# Supplementary material for: Common and specific gene regulatory programs in zebrafish caudal fin regeneration at single-cell resolution
Source: HighWire-hosted journal article supplement (doi:10.1101/gr.279372.124), 2025-01-01
Supplement: Supplemental_Table_S1.xlsx [file Supplemental_Table_S1.xlsx]

## Sheet: Supplementary Table S1A
Supplementary Table S1. Basic QC and cell type differentially expressed features
A. Basic quality control metrics for samples
SampleName	Total raw reads RNA	Total raw reads ATAC	Valid barcode percentage RNA	Valid barcode percentage ATAC	median UMI/nucleus	Total genes detected	median gene counts/nucleus	median ATAC fragments/nucleus	median Feature peaks (peak with at least one fragment)/nucleus	median TSS enrichment score/nucleus	median reads in peak ratio	mediean RNA mitochondria percentage	median ATAC mitochondria percentage	Cell number after quality control
0dpa1	534M	389M	0.93	0.98	3394	24264	1264	3547	3133	5.18948	0.788909	5.48627	0.330781	5356
0dpa2	528M	532M	0.94	0.98	3450	24469	1362	5839	4996	4.61561	0.80137	6.18627	0.00252736	8593
1dpa1	457M	504M	0.93	0.98	3867	24757	1595	4233	3778	4.66521	0.786665	6.75529	0.330718	11681
1dpa2	475M	589M	0.94	0.98	5298	24198	1950	9750	7957	4.12652	0.754666	5.92117	0	3875
2dpa1	523M	390M	0.93	0.98	2826	25314	1365	4752.5	4410	4.15365	0.688561	7.11376	0.0443336	13204
2dpa2	477M	471M	0.94	0.98	5360.5	24755	2009.5	6473.5	5643.5	4.26311	0.719138	6.97532	0.325037	4588
4dpa1	590M	437M	0.93	0.98	3773.5	25602	1628	5104	4618	4.37502	0.728195	6.15108	0.0690876	14744
4dpa2	564M	502M	0.93	0.98	4032	25172	1652	7012	6057	4.20773	0.711496	6.24818	0.246175	7059
6dpa1	598M	350M	0.94	0.98	3917	25227	1631	6113	5311	4.60698	0.765937	6.07559	0.23382	10033
6dpa2	499M	402M	0.94	0.98	4746.5	24982	1815	8155	6770.5	4.40877	0.757332	2.67781	1.69203	4148
Number of cells after quality control
	0dpa1	0dpa2	1dpa1	1dpa2	2dpa1	2dpa2	4dpa1	4dpa2	6dpa1	6dpa2
Superficial_Epithelial	1194	3268	1301	784	486	254	1445	1159	2594	1702
Intermediate_Epithelial	2379	3273	7531	2363	8557	3031	7948	3499	4540	1323
Basal_Epithelial	952	1389	2285	525	3182	944	3047	1333	1667	442
Epidermal_Mucous_1	131	135	101	21	36	24	94	69	134	36
Epidermal_Mucous_2	63	50	38	4	23	9	40	18	59	24
Metaphocyte	14	22	21	11	52	3	54	25	42	10
Hematopoietic_1	53	74	158	66	142	66	135	106	235	187
Hematopoietic_2	79	50	39	17	18	11	34	16	74	101
Mesenchymal_1	273	123	61	30	442	133	1153	434	377	165
Mesenchymal_2	151	78	54	31	128	64	458	256	123	96
Endothelial	4	5	13	3	24	4	79	33	8	9
Pigment	22	22	5	1	14	4	63	26	22	12
Unknown_1	25	64	67	14	85	33	171	82	149	39
Unknown_2	16	40	7	5	15	8	23	3	9	2
Number of fish pooled for each sample
Sample	0dpa1	0dpa2	1dpa1	1dpa2	2dpa1	2dpa2	4dpa1	4dpa2	6dpa1	6dpa2
Fish number	22	22	33	33	20	20	15	15	12	12

## Sheet: Supplementary Table S1B
Supplementary Table S1. Basic QC and cell type differentially expressed features
B Cell type marker genes and listerature reference
WNN clusters	Cell type	Marker gene used	Literature reference title
1, 10	Superficial epithelial cells	krt1-19d	1). Cellular diversity of the regenerating caudal fin 2). Claudin-23 reshapes epithelial tight junction architecture to regulate barrier function
		cldn23a
0, 3, 4, 7	Intermediate epithelial cells	cldna
		tp63
2, 5	Basal epithelial cells	cldni
		fras1	The Fraser complex interconnects tissue layers to support basal epidermis and osteoblast integrated morphogenesis underlying fin skeletal patterning
11	Epidermal mucous cells cluster 1	agr2	1).Cellular diversity of the regenerating caudal fin 2).Delta/Jagged-mediated Notch signaling induces the differentiation of agr2-positive epidermal mucous cells in zebrafish embryos
		cldnh	Cellular diversity of the regenerating caudal fin
14	Epidermal mucous cells cluster 2	pvalb8	1)Zebrafish grainyhead-like1 is a common marker of different non-keratinocyte epidermal cell lineages, which segregate from each other in a Foxi3-dependent manner 2).Delta/Jagged-mediated Notch signaling induces the differentiation of agr2-positive epidermal mucous cells in zebrafish embryos
		cldnh	Cellular diversity of the regenerating caudal fin
9	Hematopoietic cells cluster1	ptprc (human orth. CD45)	Protein tyrosine phosphatase receptor type C (PTPRC or CD45)
		mpeg1.1	2).Cellular diversity of the regenerating caudal fin
13	Hematopoietic cells cluster2	ptprc (human orth. CD45)	Protein tyrosine phosphatase receptor type C (PTPRC or CD45)
		tnfrsf9b (human orth. TNFRSF9/CD137/4-1BB)	1).cDNA sequences of two inducible T-cell genes (human 4-1BB) 2).A new member of the tumor necrosis factor/nerve growth factor receptor family inhibits T cell receptor-induced apoptosis (mouse ILA)
6	Mesenchymal cells cluster 1	tnfaip6	Cellular diversity of the regenerating caudal fin
		msx1b	1).Differential induction of four msx homeobox genes during fin development and regeneration in zebrafish. 2).Cellular diversity of the regenerating caudal fin
		prrx1b	Prrx1b restricts fibrosis and promotes Nrg1-dependent cardiomyocyte proliferation during zebrafish heart regeneration.
		twist1a	1).Twist controls skeletal development and dorsoventral patterning by regulating runx2 in zebrafish 2).Cellular diversity of the regenerating caudal fin
8	Mesenchymal cells cluster 2	tnfaip6	Cellular diversity of the regenerating caudal fin
		msx1b	1).Differential induction of four msx homeobox genes during fin development and regeneration in zebrafish. 2).Cellular diversity of the regenerating caudal fin
		cdh11	1). Single-cell resolution of MET- and EMT-like programs in osteoblasts during zebrafish fin regeneration 2).Insulin-like growth factor receptor / mTOR signaling elevates global translation to accelerate zebraﬁsh ﬁn regenerative outgrowth
17	Vascular Endothelium	kdrl	1).In Vivo Imaging of Embryonic Vascular Development Using Transgenic Zebrafish 2).The growth of endothelial-like cells in zebrafish embryoid body culture
		fli1a
16	Pigment cell	trpm1b	Single-cell RNA analysis identifies pre-migratory neural crest cells expressing markers of differentiated derivatives
		gpr143
15	Metaphocyte cell	grn2	1). Endoderm-Derived Myeloid-like Metaphocytes in Zebrafish Gill Mediate Soluble Antigen-Induced Immunity 2). Metaphocytes are IL-22BP-producing cells regulated by ETS transcription factor Spic and essential for zebrafish barrier immunity
		cdh28
		mpeg1.1
		cldnh	1).The macrophage-expressed gene (mpeg) 1 identifies a subpopulation of B cells in the adult zebrafish 2). Zebrafish macrophage developmental arrest underlies depletion of microglia and reveals Csf1r-independent metaphocytes
12	Unknown-1	si:ch211-213d14.1 (Orthologous to human C11orf53)	1).OCA-T1 and OCA-T2 are coactivators of POU2F3 in the tuft cell lineage 2).POU2AF2/C11orf53 functions as a coactivator of POU2F3 by maintaining chromatin accessibility and enhancer activity
		gng13a	1).Tuft Cells Increase Following Ovine Intestinal Parasite Infections and Define Evolutionarily Conserved and Divergent Responses 2).A cell atlas of microbe-responsive processes in the zebrafish intestine
18	Unknown-2	fndc7a	Dynamic gene expression by putative hair-cell progenitors during regeneration in the zebrafish lateral line
		stm	Epithelial Planar Bipolarity Emerges from Notch-Mediated Asymmetric Inhibition of Emx2

## Sheet: Supplementary Table S1C
Supplementary Table S1. Basic QC and cell type differentially expressed features
C Cell type DEGs (top200)
p_val	avg_log2FC	pct.1	pct.2	p_val_adj	cell types	gene
0	4.03259	0.872	0.244	0	Superficial_Epithelial	ugt5f1
0	3.924	0.896	0.134	0	Superficial_Epithelial	abcb5
0	3.9107	0.955	0.169	0	Superficial_Epithelial	si:dkey-7c18.24
0	3.90151	0.975	0.408	0	Superficial_Epithelial	si:dkey-247k7.2
0	3.87119	0.968	0.331	0	Superficial_Epithelial	si:ch211-207n23.2
0	3.83183	0.857	0.19	0	Superficial_Epithelial	si:ch211-217k17.9
0	3.51859	0.523	0.134	0	Superficial_Epithelial	sult2st3
0	3.46131	0.853	0.08	0	Superficial_Epithelial	si:dkey-239b22.1
0	3.37806	0.909	0.222	0	Superficial_Epithelial	krt1-19d
0	3.33921	0.966	0.257	0	Superficial_Epithelial	si:ch211-125o16.4
0	3.15364	0.972	0.382	0	Superficial_Epithelial	dhrs13a.2
0	3.14704	0.583	0.149	0	Superficial_Epithelial	CR926130.2
0	3.11622	0.984	0.377	0	Superficial_Epithelial	cldne
0	3.08733	0.923	0.192	0	Superficial_Epithelial	specc1
0	3.04213	0.997	0.681	0	Superficial_Epithelial	zgc:111983
0	2.98571	0.927	0.293	0	Superficial_Epithelial	mid1ip1a
0	2.8333	0.961	0.262	0	Superficial_Epithelial	CR388047.3
0	2.81912	0.562	0.205	0	Superficial_Epithelial	ogfrl2
0	2.81268	0.533	0.249	0	Superficial_Epithelial	gig2l
0	2.76675	0.797	0.038	0	Superficial_Epithelial	atp10b
0	2.72351	0.517	0.102	0	Superficial_Epithelial	nos2a
0	2.66975	0.85	0.081	0	Superficial_Epithelial	niban1a
0	2.62212	0.784	0.176	0	Superficial_Epithelial	CABZ01048956.1
0	2.61776	0.98	0.503	0	Superficial_Epithelial	si:ch211-157c3.4
0	2.59135	0.995	0.773	0	Superficial_Epithelial	zgc:193505
0	2.58904	0.787	0.117	0	Superficial_Epithelial	si:dkeyp-1h4.6
0	2.57422	0.625	0.265	0	Superficial_Epithelial	hsp90aa1.2
0	2.55829	0.671	0.073	0	Superficial_Epithelial	si:ch73-338o16.4
0	2.49512	0.679	0.042	0	Superficial_Epithelial	FP236157.7
0	2.47776	0.462	0.059	0	Superficial_Epithelial	zgc:152670
0	2.44814	0.98	0.653	0	Superficial_Epithelial	si:ch211-69b7.6
0	2.42781	0.619	0.043	0	Superficial_Epithelial	si:dkey-223p19.1
0	2.40233	0.576	0.077	0	Superficial_Epithelial	si:ch211-217k17.10
0	2.40193	0.837	0.117	0	Superficial_Epithelial	si:ch211-232i5.1
0	2.39065	0.877	0.225	0	Superficial_Epithelial	si:dkey-30j22.1
0	2.38191	0.757	0.095	0	Superficial_Epithelial	cldn23a
0	2.37062	0.75	0.108	0	Superficial_Epithelial	si:dkey-221j11.3
0	2.361	0.932	0.338	0	Superficial_Epithelial	stard14
0	2.35807	0.973	0.514	0	Superficial_Epithelial	FO681323.1
0	2.34695	0.543	0.159	0	Superficial_Epithelial	hsp70.3
0	2.33213	0.762	0.076	0	Superficial_Epithelial	soul2
0	2.32389	0.561	0.067	0	Superficial_Epithelial	FO834828.1
0	2.30295	0.511	0.043	0	Superficial_Epithelial	zgc:163079
0	2.28809	0.846	0.237	0	Superficial_Epithelial	pard6a
0	2.27666	0.554	0.066	0	Superficial_Epithelial	CABZ01068842.1
0	2.27533	0.964	0.427	0	Superficial_Epithelial	si:dkey-56e3.2
0	2.24928	0.933	0.261	0	Superficial_Epithelial	si:ch211-98n17.5
0	2.23276	0.954	0.474	0	Superficial_Epithelial	CABZ01072532.1
0	2.21677	0.928	0.516	0	Superficial_Epithelial	chac1
0	2.20889	0.992	0.679	0	Superficial_Epithelial	ppl
0	2.19568	0.5	0.031	0	Superficial_Epithelial	zgc:100868
0	2.1905	0.78	0.178	0	Superficial_Epithelial	bicdl2l
0	2.17296	0.97	0.706	0	Superficial_Epithelial	selenow1
0	2.15126	0.627	0.058	0	Superficial_Epithelial	lgals3bpa
0	2.14843	0.549	0.032	0	Superficial_Epithelial	CT030129.1
0	2.1379	0.681	0.182	0	Superficial_Epithelial	sik1
0	2.09874	0.668	0.056	0	Superficial_Epithelial	ponzr2
0	2.06356	0.891	0.237	0	Superficial_Epithelial	paqr5b
0	2.06174	0.652	0.347	0	Superficial_Epithelial	krt17
0	2.05721	0.802	0.18	0	Superficial_Epithelial	hip1rb
0	2.03456	0.679	0.126	0	Superficial_Epithelial	CU914622.2
0	2.00825	0.66	0.124	0	Superficial_Epithelial	nkx3-1
0	1.99418	0.686	0.253	0	Superficial_Epithelial	ampd3b
0	1.99218	0.959	0.549	0	Superficial_Epithelial	tnks1bp1
0	1.99047	0.683	0.063	0	Superficial_Epithelial	stx11b.1
0	1.97461	0.48	0.022	0	Superficial_Epithelial	si:ch211-226h7.5
0	1.97459	0.554	0.045	0	Superficial_Epithelial	si:ch211-217k17.8
0	1.97128	0.89	0.468	0	Superficial_Epithelial	sec23b
0	1.96332	0.549	0.022	0	Superficial_Epithelial	tmprss13a
0	1.9568	0.975	0.584	0	Superficial_Epithelial	rhpn2
0	1.9453	0.903	0.461	0	Superficial_Epithelial	tgm5l
0	1.93941	0.395	0.084	0	Superficial_Epithelial	hsp70.2
0	1.93094	0.791	0.18	0	Superficial_Epithelial	eps8l1a
0	1.92836	0.812	0.295	0	Superficial_Epithelial	ftr83
0	1.92476	0.572	0.054	0	Superficial_Epithelial	apodb
0	1.91949	0.811	0.291	0	Superficial_Epithelial	FO834828.2
0	1.91892	0.565	0.168	0	Superficial_Epithelial	papss2a
0	1.91412	0.622	0.089	0	Superficial_Epithelial	si:ch73-329n5.1
0	1.90611	0.773	0.219	0	Superficial_Epithelial	hopx
0	1.90475	0.378	0.096	0	Superficial_Epithelial	si:ch211-153b23.5
0	1.90003	0.91	0.372	0	Superficial_Epithelial	si:ch211-79k12.1
0	1.89324	0.626	0.043	0	Superficial_Epithelial	abca12
0	1.88943	0.984	0.703	0	Superficial_Epithelial	cd74a
0	1.8818	0.896	0.37	0	Superficial_Epithelial	agr1
0	1.87719	0.834	0.324	0	Superficial_Epithelial	CU856539.2
0	1.86675	0.593	0.027	0	Superficial_Epithelial	CU571315.3
0	1.86579	0.994	0.711	0	Superficial_Epithelial	lmo7a
0	1.86377	0.85	0.478	0	Superficial_Epithelial	dnajb1b
0	1.8605	0.96	0.661	0	Superficial_Epithelial	tob1b
0	1.85588	0.749	0.134	0	Superficial_Epithelial	si:dkey-33i11.9
0	1.85388	0.602	0.047	0	Superficial_Epithelial	zmp:0000000845
0	1.8523	0.998	0.839	0	Superficial_Epithelial	evpla
0	1.81806	0.77	0.204	0	Superficial_Epithelial	styk1a
0	1.80098	0.975	0.526	0	Superficial_Epithelial	hsd17b12a
0	1.79634	0.955	0.626	0	Superficial_Epithelial	ptpn13
0	1.79573	0.666	0.107	0	Superficial_Epithelial	si:dkey-165e24.1
0	1.77857	0.707	0.207	0	Superficial_Epithelial	usp54a
0	1.77726	0.825	0.333	0	Superficial_Epithelial	evi5b
0	1.77102	0.749	0.155	0	Superficial_Epithelial	zgc:110333
0	1.76728	0.551	0.048	0	Superficial_Epithelial	muc13a
0	1.76481	0.828	0.464	0	Superficial_Epithelial	mhc2dab
0	1.76329	0.992	0.929	0	Superficial_Epithelial	b2ml
0	1.74682	0.661	0.104	0	Superficial_Epithelial	adgrf6
0	1.74158	0.648	0.134	0	Superficial_Epithelial	ftr14l
0	1.73986	0.985	0.788	0	Superficial_Epithelial	cd74b
0	1.73711	0.823	0.338	0	Superficial_Epithelial	zgc:152791
0	1.6943	0.985	0.779	0	Superficial_Epithelial	ezrb
0	1.67785	0.629	0.183	0	Superficial_Epithelial	foxo1b
0	1.66974	0.71	0.244	0	Superficial_Epithelial	rasgef1ba
0	1.65579	0.496	0.022	0	Superficial_Epithelial	cyldb
0	1.6413	0.313	0.049	0	Superficial_Epithelial	entpd8
0	1.63542	0.667	0.168	0	Superficial_Epithelial	magi3b
0	1.6314	0.785	0.305	0	Superficial_Epithelial	si:ch211-202f5.3
0	1.6292	0.513	0.086	0	Superficial_Epithelial	cgas
0	1.61848	0.39	0.079	0	Superficial_Epithelial	eps8l2
0	1.61756	0.589	0.273	0	Superficial_Epithelial	atf3
0	1.61659	0.86	0.454	0	Superficial_Epithelial	etnk1
0	1.58649	0.882	0.482	0	Superficial_Epithelial	kif26ab
0	1.58549	0.48	0.024	0	Superficial_Epithelial	adgrf8
0	1.57954	0.765	0.224	0	Superficial_Epithelial	si:dkey-87o1.2
0	1.57293	0.545	0.065	0	Superficial_Epithelial	si:ch211-232i5.3
0	1.57046	0.595	0.225	0	Superficial_Epithelial	klf4
0	1.56252	0.858	0.451	0	Superficial_Epithelial	anxa1b
0	1.56083	0.653	0.147	0	Superficial_Epithelial	elovl6l
0	1.56023	0.694	0.272	0	Superficial_Epithelial	arhgdig
0	1.54634	0.695	0.253	0	Superficial_Epithelial	stk17al
0	1.54135	0.921	0.613	0	Superficial_Epithelial	frmd4ba
0	1.53908	0.809	0.332	0	Superficial_Epithelial	cxadr
0	1.53558	0.733	0.25	0	Superficial_Epithelial	slc37a1
0	1.53187	0.896	0.663	0	Superficial_Epithelial	macrod2
0	1.52682	0.406	0.03	0	Superficial_Epithelial	zgc:113625
0	1.5248	0.5	0.063	0	Superficial_Epithelial	zgc:113229
0	1.51052	0.8	0.302	0	Superficial_Epithelial	si:ch73-204p21.2
0	1.50596	0.506	0.124	0	Superficial_Epithelial	aacs
0	1.50128	0.763	0.327	0	Superficial_Epithelial	si:ch211-197e7.1
0	1.49852	0.895	0.485	0	Superficial_Epithelial	magi1b
0	1.49828	0.919	0.43	0	Superficial_Epithelial	pcdh1b
0	1.49646	0.987	0.892	0	Superficial_Epithelial	ubb
0	1.48898	0.475	0.031	0	Superficial_Epithelial	si:ch73-329n5.2
0	1.48523	0.598	0.131	0	Superficial_Epithelial	vamp8
0	1.48453	0.85	0.432	0	Superficial_Epithelial	sh3d21
0	1.48088	0.677	0.173	0	Superficial_Epithelial	igsf5a
0	1.47431	0.499	0.12	0	Superficial_Epithelial	si:dkeyp-97a10.1
0	1.45475	0.756	0.37	0	Superficial_Epithelial	jun
0	1.45356	0.44	0.054	0	Superficial_Epithelial	slc46a2
0	1.45198	0.473	0.037	0	Superficial_Epithelial	rarres3
0	1.44895	0.907	0.556	0	Superficial_Epithelial	csnk1da
0	1.44587	0.973	0.688	0	Superficial_Epithelial	znf185
0	1.4419	0.855	0.507	0	Superficial_Epithelial	sqstm1
0	1.44181	0.44	0.045	0	Superficial_Epithelial	si:dkeyp-86h10.3
0	1.44049	0.931	0.559	0	Superficial_Epithelial	gmds
0	1.43482	0.535	0.264	0	Superficial_Epithelial	mhc2b
0	1.43263	0.996	0.948	0	Superficial_Epithelial	mhc1zba
0	1.43061	0.588	0.159	0	Superficial_Epithelial	si:dkey-188i13.6
0	1.42998	0.683	0.306	0	Superficial_Epithelial	cdc42ep5
0	1.42479	0.969	0.704	0	Superficial_Epithelial	zgc:92242
0	1.42177	0.545	0.118	0	Superficial_Epithelial	CU693379.1
0	1.42104	0.498	0.048	0	Superficial_Epithelial	si:dkey-175d9.2
0	1.42083	0.993	0.96	0	Superficial_Epithelial	b2m
0	1.4178	0.29	0.024	0	Superficial_Epithelial	si:ch211-153b23.4
0	1.41649	0.437	0.022	0	Superficial_Epithelial	noxo1a
0	1.41541	0.332	0.087	0	Superficial_Epithelial	slc26a2
0	1.41361	0.777	0.326	0	Superficial_Epithelial	myzap
0	1.41165	0.885	0.462	0	Superficial_Epithelial	elovl1a
0	1.39754	0.731	0.298	0	Superficial_Epithelial	kras
0	1.39255	0.436	0.045	0	Superficial_Epithelial	nox1
0	1.38863	0.656	0.274	0	Superficial_Epithelial	ifi45
0	1.38527	0.646	0.283	0	Superficial_Epithelial	tuft1a
0	1.38196	0.834	0.358	0	Superficial_Epithelial	si:ch73-170d6.2
0	1.37909	0.751	0.372	0	Superficial_Epithelial	sdf4
0	1.37577	0.643	0.218	0	Superficial_Epithelial	cadm4
0	1.36107	0.684	0.263	0	Superficial_Epithelial	myo1ea
0	1.35872	0.883	0.473	0	Superficial_Epithelial	osbpl7
0	1.35664	0.468	0.057	0	Superficial_Epithelial	BX901923.2
0	1.34808	0.885	0.527	0	Superficial_Epithelial	pdlim2
0	1.34142	0.403	0.03	0	Superficial_Epithelial	AL929237.1
0	1.33887	0.746	0.337	0	Superficial_Epithelial	card14
0	1.32627	0.418	0.047	0	Superficial_Epithelial	FO904966.2
0	1.32295	0.451	0.059	0	Superficial_Epithelial	si:dkeyp-51b9.3
0	1.30706	0.329	0.072	0	Superficial_Epithelial	hsp70l
0	1.30562	0.723	0.342	0	Superficial_Epithelial	tmprss13b
0	1.29448	0.447	0.073	0	Superficial_Epithelial	iqsec2b
0	1.29235	0.581	0.211	0	Superficial_Epithelial	si:ch73-248e21.1
0	1.28762	0.433	0.032	0	Superficial_Epithelial	zgc:172075
0	1.28633	0.529	0.091	0	Superficial_Epithelial	si:dkey-228d14.5
0	1.28275	0.427	0.053	0	Superficial_Epithelial	si:ch73-329n5.6
0	1.2813	0.366	0.02	0	Superficial_Epithelial	si:ch211-209n20.1
0	1.28114	0.427	0.118	0	Superficial_Epithelial	dnajb2
0	1.27414	0.501	0.131	0	Superficial_Epithelial	sox3
0	1.27352	0.88	0.538	0	Superficial_Epithelial	galnt7
0	1.26971	0.388	0.016	0	Superficial_Epithelial	FP236157.4
0	1.26658	0.634	0.309	0	Superficial_Epithelial	fhod1
0	1.25472	0.546	0.182	0	Superficial_Epithelial	chmp4c
0	1.25058	0.556	0.222	0	Superficial_Epithelial	helz2
0	1.24941	0.359	0.016	0	Superficial_Epithelial	CU207269.2
0	1.24888	0.327	0.023	0	Superficial_Epithelial	si:ch211-163c2.1
0	1.24675	0.825	0.443	0	Superficial_Epithelial	ngef
0	1.24521	0.849	0.547	0	Superficial_Epithelial	glulb
0	1.24473	0.356	0.018	0	Superficial_Epithelial	unm-sa1506
0	1.24466	0.859	0.454	0	Superficial_Epithelial	oclnb
0	2.31986	0.97	0.512	0	Intermediate_Epithelial	cldna
0	1.94069	0.591	0.271	0	Intermediate_Epithelial	malb
0	1.78635	0.893	0.769	0	Intermediate_Epithelial	krt94
0	1.74142	0.564	0.2	0	Intermediate_Epithelial	f5
0	1.6633	0.776	0.308	0	Intermediate_Epithelial	notch3
0	1.61651	0.677	0.228	0	Intermediate_Epithelial	grhl2a
0	1.56631	0.975	0.671	0	Intermediate_Epithelial	si:dkey-262k9.2
0	1.56156	0.711	0.263	0	Intermediate_Epithelial	zgc:194948
0	1.5522	0.955	0.626	0	Intermediate_Epithelial	aqp3a
0	1.54324	0.884	0.538	0	Intermediate_Epithelial	tp63
0	1.50652	0.717	0.273	0	Intermediate_Epithelial	entpd2a.1
0	1.48862	0.827	0.409	0	Intermediate_Epithelial	abtb2b
0	1.47934	0.794	0.414	0	Intermediate_Epithelial	serpinb1l4
0	1.45808	0.391	0.219	0	Intermediate_Epithelial	cxcl8b.1
0	1.41115	0.915	0.517	0	Intermediate_Epithelial	nectin4a
0	1.39578	0.998	0.901	0	Intermediate_Epithelial	cldnb
0	1.36752	1	0.996	0	Intermediate_Epithelial	krt5
0	1.36656	0.96	0.823	0	Intermediate_Epithelial	eppk1
0	1.36642	0.817	0.478	0	Intermediate_Epithelial	ccl27a
0	1.34819	0.646	0.294	0	Intermediate_Epithelial	zgc:173729
0	1.31789	0.682	0.334	0	Intermediate_Epithelial	srd5a2a
0	1.30577	0.803	0.432	0	Intermediate_Epithelial	myh14
0	1.29613	0.668	0.322	0	Intermediate_Epithelial	adka
0	1.28864	0.618	0.272	0	Intermediate_Epithelial	nrarpa
0	1.24366	0.75	0.427	0	Intermediate_Epithelial	chl1a
0	1.23376	0.546	0.216	0	Intermediate_Epithelial	btbd11a
0	1.23332	0.693	0.326	0	Intermediate_Epithelial	vgll4l
0	1.23074	0.695	0.396	0	Intermediate_Epithelial	cst14b.1
0	1.22993	0.656	0.315	0	Intermediate_Epithelial	asap3
0	1.21397	0.527	0.174	0	Intermediate_Epithelial	upk1a
0	1.19314	0.434	0.166	0	Intermediate_Epithelial	zgc:154093
0	1.18589	0.654	0.505	0	Intermediate_Epithelial	krt93
0	1.17638	0.319	0.101	0	Intermediate_Epithelial	ggt1a
0	1.16244	0.647	0.301	0	Intermediate_Epithelial	ugt8
0	1.15339	0.488	0.172	0	Intermediate_Epithelial	myb
0	1.15227	0.538	0.245	0	Intermediate_Epithelial	myo10
0	1.14976	0.5	0.224	0	Intermediate_Epithelial	amot
0	1.14271	0.695	0.402	0	Intermediate_Epithelial	jag1b
0	1.13931	0.879	0.549	0	Intermediate_Epithelial	nectin1b
0	1.12179	0.994	0.907	0	Intermediate_Epithelial	dsc2l
0	1.11273	0.481	0.189	0	Intermediate_Epithelial	tspan35
0	1.11164	0.555	0.313	0	Intermediate_Epithelial	enah
0	1.10722	0.88	0.616	0	Intermediate_Epithelial	tnika
0	1.10522	0.741	0.439	0	Intermediate_Epithelial	rhov
0	1.07602	0.542	0.216	0	Intermediate_Epithelial	gprc5c
0	1.06176	0.848	0.63	0	Intermediate_Epithelial	myo1cb
0	1.04749	0.596	0.296	0	Intermediate_Epithelial	gdpd3a
0	1.04298	0.521	0.243	0	Intermediate_Epithelial	rpz5
0	1.04181	0.997	0.945	0	Intermediate_Epithelial	dspa
0	1.03767	0.998	0.959	0	Intermediate_Epithelial	perp
0	1.03745	0.996	0.975	0	Intermediate_Epithelial	krt91
0	1.02691	0.909	0.74	0	Intermediate_Epithelial	pkp1b
0	1.02116	0.581	0.341	0	Intermediate_Epithelial	jag1a
0	1.00054	0.672	0.365	0	Intermediate_Epithelial	CU179643.1
0	0.998016	0.758	0.497	0	Intermediate_Epithelial	llgl2
0	0.995383	0.526	0.282	0	Intermediate_Epithelial	cep85l
0	0.992993	0.773	0.678	0	Intermediate_Epithelial	krt97
0	0.97527	0.738	0.518	0	Intermediate_Epithelial	relt
0	0.975197	0.907	0.694	0	Intermediate_Epithelial	tmem176l.4
0	0.965481	0.339	0.144	0	Intermediate_Epithelial	cxcl14
0	0.957288	0.192	0.102	0	Intermediate_Epithelial	saa
0	0.945257	0.442	0.197	0	Intermediate_Epithelial	si:dkey-266f7.5
0	0.939348	0.456	0.193	0	Intermediate_Epithelial	fam83fa
0	0.939315	0.579	0.299	0	Intermediate_Epithelial	mfge8b
0	0.933749	0.816	0.53	0	Intermediate_Epithelial	lrp1ab
0	0.929651	0.788	0.627	0	Intermediate_Epithelial	si:busm1-57f23.1
0	0.929174	0.729	0.412	0	Intermediate_Epithelial	arhgef10lb
0	0.927302	0.677	0.597	0	Intermediate_Epithelial	krt18a.1
0	0.919354	0.632	0.373	0	Intermediate_Epithelial	chn2
0	0.912119	0.733	0.482	0	Intermediate_Epithelial	lifrb
0	0.911358	0.731	0.451	0	Intermediate_Epithelial	erbb3a
0	0.90905	0.556	0.301	0	Intermediate_Epithelial	pla2g7
0	0.901756	0.617	0.369	0	Intermediate_Epithelial	ppfibp2b
0	0.897383	0.739	0.493	0	Intermediate_Epithelial	fam83b
0	0.89483	0.609	0.446	0	Intermediate_Epithelial	vmp1
0	0.891408	0.48	0.241	0	Intermediate_Epithelial	slc16a1b
0	0.886614	0.355	0.164	0	Intermediate_Epithelial	pdzd2
0	0.88487	0.578	0.294	0	Intermediate_Epithelial	ltb4r2a
0	0.882842	0.706	0.495	0	Intermediate_Epithelial	ptgis
0	0.879421	0.904	0.731	0	Intermediate_Epithelial	cd44a
0	0.879021	0.614	0.337	0	Intermediate_Epithelial	zgc:173709
0	0.876921	0.967	0.836	0	Intermediate_Epithelial	tmsb1
0	0.875933	0.958	0.74	0	Intermediate_Epithelial	cldn7b
0	0.873561	0.677	0.45	0	Intermediate_Epithelial	ppp1r14bb
0	0.867751	0.563	0.317	0	Intermediate_Epithelial	trpm4b.2
0	0.86625	0.248	0.091	0	Intermediate_Epithelial	arhgap32a
0	0.865676	0.846	0.622	0	Intermediate_Epithelial	oclna
0	0.864488	0.853	0.521	0	Intermediate_Epithelial	fat2
0	0.862889	0.282	0.173	0	Intermediate_Epithelial	nppc
0	0.861719	0.751	0.555	0	Intermediate_Epithelial	irs2b
0	0.852893	0.681	0.477	0	Intermediate_Epithelial	plekhn1
0	0.847805	0.459	0.233	0	Intermediate_Epithelial	plk2a
0	0.832738	0.893	0.759	0	Intermediate_Epithelial	tnfrsfa
0	0.827013	0.455	0.23	0	Intermediate_Epithelial	atp1a1b
0	0.824914	0.605	0.502	0	Intermediate_Epithelial	tcnbb
0	0.823795	0.866	0.681	0	Intermediate_Epithelial	yap1
0	0.821956	0.754	0.655	0	Intermediate_Epithelial	fn1b
0	0.821543	0.283	0.184	0	Intermediate_Epithelial	cxcl18b
0	0.820729	0.531	0.348	0	Intermediate_Epithelial	cxl34c
0	0.813664	0.295	0.108	0	Intermediate_Epithelial	upk3b
0	0.813408	0.82	0.58	0	Intermediate_Epithelial	arhgef4
0	0.813032	0.993	0.909	0	Intermediate_Epithelial	ptprfb
0	0.809776	0.403	0.204	0	Intermediate_Epithelial	homer3b
0	0.809346	0.478	0.251	0	Intermediate_Epithelial	zmp:0000000936
0	0.806067	0.614	0.418	0	Intermediate_Epithelial	bnipl
0	0.805859	0.35	0.148	0	Intermediate_Epithelial	neurl1aa
0	0.798385	0.394	0.268	0	Intermediate_Epithelial	ppap2d
0	0.797651	0.882	0.746	0	Intermediate_Epithelial	ywhaz
0	0.7966	0.816	0.631	0	Intermediate_Epithelial	cyth1a.1
0	0.790978	0.75	0.569	0	Intermediate_Epithelial	pld1a
0	0.790502	0.485	0.305	0	Intermediate_Epithelial	triob
0	0.788335	0.529	0.338	0	Intermediate_Epithelial	ephb6
0	0.788076	0.549	0.355	0	Intermediate_Epithelial	efr3a
0	0.774552	0.325	0.186	0	Intermediate_Epithelial	pdlim4
0	0.773694	0.618	0.399	0	Intermediate_Epithelial	tspan9a
0	0.770837	0.341	0.134	0	Intermediate_Epithelial	si:ch211-132g1.7
0	0.766133	0.32	0.135	0	Intermediate_Epithelial	wu:fj05g07
0	0.764848	0.521	0.309	0	Intermediate_Epithelial	kidins220a
0	0.763326	0.525	0.319	0	Intermediate_Epithelial	ms4a17a.4
0	0.76049	0.891	0.729	0	Intermediate_Epithelial	si:ch211-207i1.2
0	0.758674	0.893	0.751	0	Intermediate_Epithelial	pof1b
0	0.757252	0.502	0.328	0	Intermediate_Epithelial	kifc3
0	0.756334	0.773	0.562	0	Intermediate_Epithelial	CU467961.1
0	0.755723	0.891	0.746	0	Intermediate_Epithelial	si:ch211-166a6.5
0	0.754856	0.641	0.406	0	Intermediate_Epithelial	plekhg2
0	0.754713	0.416	0.245	0	Intermediate_Epithelial	lzts1
0	0.748485	0.339	0.154	0	Intermediate_Epithelial	cttnbp2nlb
0	0.746924	0.742	0.54	0	Intermediate_Epithelial	gpa33a
0	0.744652	0.488	0.296	0	Intermediate_Epithelial	gstp1
0	0.743232	0.72	0.479	0	Intermediate_Epithelial	tmprss4a
0	0.742185	0.661	0.467	0	Intermediate_Epithelial	cst3
0	0.741622	0.461	0.252	0	Intermediate_Epithelial	ezra
0	0.736343	0.466	0.279	0	Intermediate_Epithelial	tmem154
0	0.735839	0.496	0.326	0	Intermediate_Epithelial	ptpn3
0	0.730652	0.749	0.482	0	Intermediate_Epithelial	lsp1b
0	0.728471	0.377	0.189	0	Intermediate_Epithelial	znf750
0	0.724434	0.192	0.086	0	Intermediate_Epithelial	ly6m2
0	0.721908	0.639	0.421	0	Intermediate_Epithelial	sema4ba
0	0.719748	0.725	0.583	0	Intermediate_Epithelial	rtn3
0	0.71889	0.319	0.134	0	Intermediate_Epithelial	fbxl3a
0	0.718327	0.986	0.885	0	Intermediate_Epithelial	baiap2a
0	0.718157	0.566	0.421	0	Intermediate_Epithelial	abca1a
0	0.713288	0.579	0.418	0	Intermediate_Epithelial	ptgs2a
0	0.711468	0.547	0.364	0	Intermediate_Epithelial	si:ch211-207d6.2
0	0.710571	0.687	0.505	0	Intermediate_Epithelial	wnk1b
0	0.708336	0.688	0.447	0	Intermediate_Epithelial	lnx1
0	0.704511	0.584	0.438	0	Intermediate_Epithelial	rin2
0	0.703673	0.975	0.842	0	Intermediate_Epithelial	zgc:153665
0	0.701345	0.72	0.565	0	Intermediate_Epithelial	slc20a2
0	0.699753	0.581	0.407	0	Intermediate_Epithelial	ENSDARG00000098374
0	0.69861	0.837	0.68	0	Intermediate_Epithelial	FAM83G
0	0.698503	0.315	0.136	0	Intermediate_Epithelial	hey1
0	0.698442	0.453	0.257	0	Intermediate_Epithelial	rapgefl1
0	0.697345	0.762	0.559	0	Intermediate_Epithelial	tiam1a
0	0.696295	0.351	0.166	0	Intermediate_Epithelial	itgb3b
0	0.685409	0.409	0.246	0	Intermediate_Epithelial	ndrg2
0	0.682767	0.292	0.125	0	Intermediate_Epithelial	s100z
0	0.682359	0.763	0.608	0	Intermediate_Epithelial	pawr
0	0.681984	0.833	0.674	0	Intermediate_Epithelial	egfra
0	0.681255	0.923	0.765	0	Intermediate_Epithelial	hivep2a
0	0.680907	0.846	0.718	0	Intermediate_Epithelial	ywhaqb
0	0.680878	0.555	0.431	0	Intermediate_Epithelial	lsp1a
0	0.680156	0.297	0.122	0	Intermediate_Epithelial	nrarpb
0	0.67991	0.834	0.565	0	Intermediate_Epithelial	myo5b
0	0.679217	0.557	0.366	0	Intermediate_Epithelial	mpzl2b
0	0.678667	0.365	0.208	0	Intermediate_Epithelial	sox4a
0	0.676494	0.409	0.211	0	Intermediate_Epithelial	slc22a23
0	0.675088	0.387	0.201	0	Intermediate_Epithelial	slitrk6
0	0.674189	0.997	0.958	0	Intermediate_Epithelial	epcam
0	0.671724	0.6	0.383	0	Intermediate_Epithelial	dennd2b
0	0.671512	0.804	0.643	0	Intermediate_Epithelial	abi1a
0	0.664409	0.262	0.097	0	Intermediate_Epithelial	zbtb7c
0	0.654207	0.291	0.144	0	Intermediate_Epithelial	rap1gap2a
0	0.652253	0.833	0.696	0	Intermediate_Epithelial	adipor2
0	0.64856	0.773	0.602	0	Intermediate_Epithelial	pcxa
0	0.646264	0.265	0.115	0	Intermediate_Epithelial	LO017965.1
0	0.644144	0.339	0.176	0	Intermediate_Epithelial	dop1b
0	0.642808	0.533	0.339	0	Intermediate_Epithelial	ralgps2
0	0.640926	0.644	0.486	0	Intermediate_Epithelial	tnikb
0	0.636871	0.768	0.619	0	Intermediate_Epithelial	sema6e
0	0.636338	0.364	0.215	0	Intermediate_Epithelial	prkceb
0	0.633735	0.641	0.485	0	Intermediate_Epithelial	anxa1c
0	0.626558	0.606	0.436	0	Intermediate_Epithelial	si:ch211-105c13.3
0	0.626328	0.341	0.171	0	Intermediate_Epithelial	arpc5lb
0	0.624274	0.754	0.589	0	Intermediate_Epithelial	st14a
0	0.615133	0.468	0.329	0	Intermediate_Epithelial	rflna
0	0.61233	0.525	0.341	0	Intermediate_Epithelial	ano9b
0	0.611825	0.741	0.588	0	Intermediate_Epithelial	SGMS1
0	0.611425	0.551	0.351	0	Intermediate_Epithelial	FRMD1
0	0.609207	0.999	0.993	0	Intermediate_Epithelial	si:dkey-248g15.3
0	0.606539	0.85	0.717	0	Intermediate_Epithelial	baz2ba
0	0.605994	0.477	0.321	0	Intermediate_Epithelial	acvr1ba
0	0.605384	0.462	0.309	0	Intermediate_Epithelial	zgc:195173
0	0.604651	0.393	0.254	0	Intermediate_Epithelial	sc:d0202.1
0	0.600469	0.997	0.946	0	Intermediate_Epithelial	cdh1
0	0.598307	0.67	0.539	0	Intermediate_Epithelial	arhgap17a
0	0.597085	0.782	0.614	0	Intermediate_Epithelial	ctsla
0	0.596368	0.854	0.727	0	Intermediate_Epithelial	dip2ba
0	0.593972	0.261	0.134	0	Intermediate_Epithelial	inka1a
0	0.592461	0.792	0.648	0	Intermediate_Epithelial	ext1b
0	3.91968	0.97	0.27	0	Basal_Epithelial	itgb4
0	3.74708	0.96	0.259	0	Basal_Epithelial	itga6b
0	3.46128	0.978	0.357	0	Basal_Epithelial	col17a1b
0	3.18107	0.864	0.135	0	Basal_Epithelial	lamc2
0	3.08276	0.845	0.249	0	Basal_Epithelial	col7a1
0	3.03965	0.646	0.17	0	Basal_Epithelial	fn1a
0	3.03668	0.958	0.501	0	Basal_Epithelial	sparc
0	2.99698	0.99	0.571	0	Basal_Epithelial	si:ch211-241e1.3
0	2.99203	0.982	0.37	0	Basal_Epithelial	cldni
0	2.9145	0.984	0.586	0	Basal_Epithelial	apoeb
0	2.85385	0.369	0.134	0	Basal_Epithelial	ptgdsb.1
0	2.80495	0.636	0.133	0	Basal_Epithelial	alpi.1
0	2.75596	0.859	0.148	0	Basal_Epithelial	hspg2
0	2.73709	0.844	0.167	0	Basal_Epithelial	bcam
0	2.71975	0.743	0.09	0	Basal_Epithelial	fras1
0	2.70928	0.306	0.062	0	Basal_Epithelial	si:ch211-76l23.4
0	2.67963	0.93	0.386	0	Basal_Epithelial	postnb
0	2.5555	0.902	0.3	0	Basal_Epithelial	col1a1b
0	2.54271	0.903	0.139	0	Basal_Epithelial	appa
0	2.49752	0.777	0.12	0	Basal_Epithelial	lama5
0	2.41231	0.914	0.316	0	Basal_Epithelial	col1a2
0	2.40619	0.515	0.169	0	Basal_Epithelial	ecm2
0	2.26564	0.417	0.082	0	Basal_Epithelial	col14a1a
0	2.25127	0.708	0.11	0	Basal_Epithelial	col18a1a
0	2.22449	0.786	0.226	0	Basal_Epithelial	frem2b
0	2.15133	0.416	0.049	0	Basal_Epithelial	thsd7ba
0	2.13432	0.789	0.169	0	Basal_Epithelial	agrn
0	2.11727	0.568	0.287	0	Basal_Epithelial	and1
0	2.09422	0.747	0.156	0	Basal_Epithelial	col4a6
0	2.0881	0.882	0.206	0	Basal_Epithelial	col5a1
0	2.03515	0.62	0.175	0	Basal_Epithelial	epgn
0	2.01585	0.375	0.072	0	Basal_Epithelial	frem3
0	2.01219	0.929	0.412	0	Basal_Epithelial	col1a1a
0	2.00252	0.802	0.11	0	Basal_Epithelial	fat1a
0	1.97461	0.353	0.103	0	Basal_Epithelial	rbp4
0	1.94516	0.851	0.294	0	Basal_Epithelial	si:ch211-222l21.1
0	1.93026	0.905	0.414	0	Basal_Epithelial	myh9a
0	1.90825	0.721	0.127	0	Basal_Epithelial	myo10l3
0	1.88816	0.628	0.075	0	Basal_Epithelial	ptprfa
0	1.885	0.627	0.107	0	Basal_Epithelial	col11a1a
0	1.86659	0.773	0.29	0	Basal_Epithelial	itga5
0	1.84076	0.595	0.082	0	Basal_Epithelial	met
0	1.83478	0.55	0.164	0	Basal_Epithelial	frem2a
0	1.82921	0.233	0.039	0	Basal_Epithelial	si:dkey-183i3.5
0	1.82492	0.807	0.239	0	Basal_Epithelial	htra1b
0	1.79906	0.497	0.058	0	Basal_Epithelial	jag2b
0	1.76553	0.311	0.057	0	Basal_Epithelial	fstl1a
0	1.74291	0.685	0.185	0	Basal_Epithelial	col4a5
0	1.74047	0.847	0.407	0	Basal_Epithelial	tfpia
0	1.72925	0.567	0.138	0	Basal_Epithelial	serpinh1b
0	1.72217	0.755	0.354	0	Basal_Epithelial	mdka
0	1.71909	0.417	0.084	0	Basal_Epithelial	si:ch211-198c19.3
0	1.71438	0.931	0.702	0	Basal_Epithelial	hbegfa
0	1.70639	0.867	0.341	0	Basal_Epithelial	si:ch211-285f17.1
0	1.69532	0.319	0.066	0	Basal_Epithelial	inhbaa
0	1.68476	0.542	0.091	0	Basal_Epithelial	igfbp5b
0	1.68103	0.666	0.222	0	Basal_Epithelial	chsy1
0	1.67055	0.173	0.039	0	Basal_Epithelial	hce2l2
0	1.65565	0.548	0.214	0	Basal_Epithelial	tnfrsf9a
0	1.64899	0.665	0.127	0	Basal_Epithelial	nrg2a
0	1.64599	0.39	0.079	0	Basal_Epithelial	si:ch211-117l17.6
0	1.64219	0.531	0.042	0	Basal_Epithelial	plek2
0	1.63817	0.629	0.168	0	Basal_Epithelial	nbn
0	1.62895	0.367	0.045	0	Basal_Epithelial	mmp30
0	1.62651	0.368	0.157	0	Basal_Epithelial	ccl25b
0	1.60332	0.384	0.07	0	Basal_Epithelial	thbs1b
0	1.59607	0.932	0.525	0	Basal_Epithelial	tanc1b
0	1.5945	0.801	0.352	0	Basal_Epithelial	si:dkey-102c8.3
0	1.5939	0.751	0.387	0	Basal_Epithelial	pfn1
0	1.58598	0.571	0.06	0	Basal_Epithelial	si:ch1073-15f12.3
0	1.57895	0.51	0.062	0	Basal_Epithelial	slit2
0	1.56685	0.685	0.127	0	Basal_Epithelial	bcar1
0	1.54956	0.663	0.198	0	Basal_Epithelial	LO018188.1
0	1.54224	0.557	0.049	0	Basal_Epithelial	itga3a
0	1.51793	0.319	0.099	0	Basal_Epithelial	clu
0	1.51626	0.59	0.107	0	Basal_Epithelial	lamc1
0	1.5138	0.323	0.048	0	Basal_Epithelial	prss35
0	1.51064	0.451	0.086	0	Basal_Epithelial	adamts17
0	1.50922	0.585	0.104	0	Basal_Epithelial	fndc3ba
0	1.5077	0.66	0.398	0	Basal_Epithelial	adam8a
0	1.50232	0.485	0.069	0	Basal_Epithelial	mxra5a
0	1.48891	0.317	0.036	0	Basal_Epithelial	ca10a
0	1.47225	0.7	0.16	0	Basal_Epithelial	col12a1b
0	1.46975	0.469	0.101	0	Basal_Epithelial	sox11a
0	1.46768	0.767	0.264	0	Basal_Epithelial	abca1b
0	1.45787	0.587	0.151	0	Basal_Epithelial	tmem132e
0	1.45654	0.833	0.419	0	Basal_Epithelial	flna
0	1.45652	0.6	0.083	0	Basal_Epithelial	ppfibp1b
0	1.44196	0.575	0.241	0	Basal_Epithelial	kremen1
0	1.42838	0.528	0.046	0	Basal_Epithelial	paplna
0	1.41806	0.402	0.098	0	Basal_Epithelial	ogna
0	1.40599	0.676	0.146	0	Basal_Epithelial	mmp2
0	1.40217	0.657	0.261	0	Basal_Epithelial	tiam2a
0	1.39934	0.6	0.196	0	Basal_Epithelial	gpc1b
0	1.39614	0.361	0.165	0	Basal_Epithelial	vcana
0	1.3836	0.679	0.178	0	Basal_Epithelial	igf1rb
0	1.38238	0.417	0.057	0	Basal_Epithelial	ptgir
0	1.38053	0.447	0.075	0	Basal_Epithelial	tubb5
0	1.37415	0.322	0.036	0	Basal_Epithelial	ca16b
0	1.3693	0.987	0.857	0	Basal_Epithelial	tmsb4x
0	1.3669	0.443	0.055	0	Basal_Epithelial	egfl6
0	1.36031	0.749	0.233	0	Basal_Epithelial	tln1
0	1.35827	0.844	0.449	0	Basal_Epithelial	vwa1
0	1.35624	0.533	0.112	0	Basal_Epithelial	tp73
0	1.35349	0.366	0.085	0	Basal_Epithelial	slc43a3b
0	1.34781	0.333	0.046	0	Basal_Epithelial	LO018644.1
0	1.3405	0.476	0.069	0	Basal_Epithelial	cavin1b
0	1.33932	0.604	0.202	0	Basal_Epithelial	sema5a
0	1.3193	0.58	0.228	0	Basal_Epithelial	col12a1a
0	1.31822	0.478	0.132	0	Basal_Epithelial	wnt5b
0	1.31815	0.506	0.069	0	Basal_Epithelial	psd2
0	1.31759	0.483	0.217	0	Basal_Epithelial	sorcs2
0	1.30693	0.229	0.029	0	Basal_Epithelial	sema5ba
0	1.2982	0.463	0.041	0	Basal_Epithelial	cldn1
0	1.29236	0.346	0.084	0	Basal_Epithelial	dcn
0	1.28906	0.443	0.074	0	Basal_Epithelial	si:ch211-250c4.4
0	1.28342	0.437	0.105	0	Basal_Epithelial	ror2
0	1.27084	0.547	0.195	0	Basal_Epithelial	mxra8a
0	1.26983	0.68	0.161	0	Basal_Epithelial	col5a2a
0	1.25786	0.532	0.093	0	Basal_Epithelial	tns1b
0	1.25308	0.638	0.214	0	Basal_Epithelial	scinla
0	1.24897	0.323	0.027	0	Basal_Epithelial	pdlim3b
0	1.24361	0.574	0.137	0	Basal_Epithelial	fstl1b
0	1.24112	0.156	0.021	0	Basal_Epithelial	zgc:136930
0	1.23099	0.726	0.259	0	Basal_Epithelial	cd81a
0	1.23012	0.649	0.275	0	Basal_Epithelial	gstm.3
0	1.22713	0.502	0.19	0	Basal_Epithelial	cav1
0	1.22637	0.251	0.068	0	Basal_Epithelial	kcnma1a
0	1.22371	0.272	0.037	0	Basal_Epithelial	myoc
0	1.22056	0.39	0.046	0	Basal_Epithelial	phldb2b
0	1.2058	0.493	0.133	0	Basal_Epithelial	bnc2
0	1.19807	0.341	0.039	0	Basal_Epithelial	sulf1
0	1.1968	0.405	0.065	0	Basal_Epithelial	dachc
0	1.19343	0.246	0.037	0	Basal_Epithelial	lef1
0	1.18276	0.733	0.349	0	Basal_Epithelial	fgfr2
0	1.18071	0.231	0.028	0	Basal_Epithelial	col17a1a
0	1.17705	0.305	0.06	0	Basal_Epithelial	rasgrp4
0	1.17692	0.677	0.251	0	Basal_Epithelial	actn1
0	1.17105	0.483	0.135	0	Basal_Epithelial	limch1b
0	1.16864	0.489	0.112	0	Basal_Epithelial	fkbp9
0	1.16657	0.874	0.577	0	Basal_Epithelial	epha7
0	1.1624	0.244	0.041	0	Basal_Epithelial	apoc1
0	1.1607	0.402	0.042	0	Basal_Epithelial	si:dkey-193c22.2
0	1.16021	0.292	0.045	0	Basal_Epithelial	cdh29
0	1.15847	0.93	0.642	0	Basal_Epithelial	thy1
0	1.15733	0.535	0.127	0	Basal_Epithelial	dock5
0	1.1569	0.285	0.037	0	Basal_Epithelial	gpc5a
0	1.15543	0.564	0.167	0	Basal_Epithelial	irs1
0	1.15462	0.592	0.107	0	Basal_Epithelial	col16a1
0	1.15219	0.628	0.214	0	Basal_Epithelial	pak2a
0	1.14585	0.868	0.488	0	Basal_Epithelial	igf1ra
0	1.13146	0.842	0.6	0	Basal_Epithelial	ppib
0	1.12842	0.586	0.127	0	Basal_Epithelial	mmp14a
0	1.12629	0.499	0.13	0	Basal_Epithelial	rps6ka1
0	1.12082	0.733	0.341	0	Basal_Epithelial	src
0	1.11415	0.34	0.067	0	Basal_Epithelial	kif26ba
0	1.11244	0.423	0.058	0	Basal_Epithelial	phldb1b
0	1.11078	0.429	0.088	0	Basal_Epithelial	ackr3b
0	1.10813	0.541	0.181	0	Basal_Epithelial	CR387919.1
0	1.10497	0.472	0.113	0	Basal_Epithelial	srgap1a
0	1.10128	0.486	0.106	0	Basal_Epithelial	bmp1a
0	1.10031	0.608	0.208	0	Basal_Epithelial	itgav
0	1.09365	0.391	0.061	0	Basal_Epithelial	nedd9
0	1.09247	0.613	0.239	0	Basal_Epithelial	anks1b
0	1.08472	0.582	0.263	0	Basal_Epithelial	cblb
0	1.08225	0.558	0.261	0	Basal_Epithelial	bcl2l10
0	1.07867	0.359	0.083	0	Basal_Epithelial	dapk2b
0	1.07728	0.445	0.079	0	Basal_Epithelial	serpinh1a
0	1.07545	0.873	0.641	0	Basal_Epithelial	tuba8l4
0	1.07004	0.67	0.27	0	Basal_Epithelial	si:ch1073-303k11.2
0	1.05826	0.331	0.067	0	Basal_Epithelial	prickle2b
0	1.05743	0.633	0.308	0	Basal_Epithelial	sb:cb1058
0	1.05727	0.379	0.038	0	Basal_Epithelial	snai2
0	1.05308	0.522	0.148	0	Basal_Epithelial	ehd2b
0	1.05139	0.317	0.056	0	Basal_Epithelial	mamdc2a
0	1.04875	0.39	0.053	0	Basal_Epithelial	CABZ01044099.1
0	1.04816	0.339	0.074	0	Basal_Epithelial	prickle1b
0	1.04812	0.422	0.1	0	Basal_Epithelial	rcn3
0	1.04699	0.579	0.209	0	Basal_Epithelial	dag1
0	1.04465	0.214	0.044	0	Basal_Epithelial	gfra4a
0	1.03594	0.526	0.182	0	Basal_Epithelial	cotl1
0	1.03087	0.783	0.472	0	Basal_Epithelial	aopep
0	1.02531	0.609	0.271	0	Basal_Epithelial	tgfbr3
0	1.01836	0.223	0.024	0	Basal_Epithelial	vipr1b
0	1.00665	0.169	0.031	0	Basal_Epithelial	krtt1c19e
0	1.00598	0.442	0.065	0	Basal_Epithelial	itgb1b
0	0.998414	0.492	0.128	0	Basal_Epithelial	map7d1b
0	0.990715	0.412	0.084	0	Basal_Epithelial	entpd1
0	0.987271	0.326	0.047	0	Basal_Epithelial	ror1
0	0.984867	0.394	0.043	0	Basal_Epithelial	fermt1
0	0.983032	0.3	0.076	0	Basal_Epithelial	tinagl1
0	0.973795	0.356	0.083	0	Basal_Epithelial	CR381618.1
0	0.967654	0.853	0.648	0	Basal_Epithelial	plch2a
0	0.967646	0.459	0.218	0	Basal_Epithelial	errfi1a
0	0.963293	0.307	0.062	0	Basal_Epithelial	grip1
0	0.956944	0.463	0.132	0	Basal_Epithelial	slc35c2
0	0.956425	0.461	0.123	0	Basal_Epithelial	wdfy3
0	0.955379	0.382	0.067	0	Basal_Epithelial	sema3fb
0	0.951642	0.317	0.091	0	Basal_Epithelial	lhfpl6
0	0.951042	0.505	0.196	0	Basal_Epithelial	il17rd
0	4.05101	0.784	0.03	0	Epidermal_Mucous	cldnh
0	3.31885	0.642	0.008	0	Epidermal_Mucous	adgrf3a
0	2.75062	0.5	0.017	0	Epidermal_Mucous	pcdh11
0	2.6831	0.643	0.023	0	Epidermal_Mucous	pou2f3
0	2.6066	0.139	0.004	0	Epidermal_Mucous	grp
0	2.50506	0.667	0.013	0	Epidermal_Mucous	hepacam2
0	2.38038	0.52	0.012	0	Epidermal_Mucous	prkg1a
0	2.3795	0.589	0.09	0	Epidermal_Mucous	pde3b
0	2.30949	0.538	0.134	0	Epidermal_Mucous	prcp
0	2.30619	0.628	0.157	0	Epidermal_Mucous	tnfrsf11b
0	2.30191	0.539	0.027	0	Epidermal_Mucous	mctp1a
0	2.28929	0.444	0.031	0	Epidermal_Mucous	tnfrsf11a
0	2.2482	0.495	0.019	0	Epidermal_Mucous	rgs13
0	2.18818	0.575	0.093	0	Epidermal_Mucous	shroom3
0	2.11737	0.451	0.004	0	Epidermal_Mucous	si:ch73-22a13.3
0	1.93073	0.412	0.016	0	Epidermal_Mucous	adgrg3
0	1.92483	0.589	0.129	0	Epidermal_Mucous	grasp
0	1.91869	0.455	0.106	0	Epidermal_Mucous	bcl3
0	1.90587	0.347	0.002	0	Epidermal_Mucous	si:ch211-63p21.4
0	1.86427	0.583	0.16	0	Epidermal_Mucous	il11ra
0	1.85158	0.529	0.099	0	Epidermal_Mucous	dab2ipb
0	1.76488	0.498	0.057	0	Epidermal_Mucous	zgc:92380
0	1.73367	0.347	0.021	0	Epidermal_Mucous	pcdh11.1
0	1.70671	0.478	0.07	0	Epidermal_Mucous	prkcea
0	1.69452	0.349	0.001	0	Epidermal_Mucous	CABZ01056052.1
0	1.60143	0.284	0.014	0	Epidermal_Mucous	si:ch73-359m17.5
0	1.57975	0.413	0.047	0	Epidermal_Mucous	fnbp1b
0	1.57805	0.333	0.018	0	Epidermal_Mucous	lyn
0	1.5211	0.314	0.017	0	Epidermal_Mucous	ak5
0	1.51833	0.315	0.01	0	Epidermal_Mucous	CABZ01056054.1
0	1.51792	0.32	0.008	0	Epidermal_Mucous	prox1a
0	1.50996	0.279	0.003	0	Epidermal_Mucous	adgrg11
0	1.50743	0.318	0.012	0	Epidermal_Mucous	myo6b
0	1.48605	0.197	0.009	0	Epidermal_Mucous	rgs5a
0	1.48487	0.309	0.002	0	Epidermal_Mucous	ccr6b
0	1.47957	0.356	0.018	0	Epidermal_Mucous	agr2
0	1.4795	0.317	0.008	0	Epidermal_Mucous	avil
0	1.4665	0.385	0.056	0	Epidermal_Mucous	cldn17
0	1.35593	0.282	0.002	0	Epidermal_Mucous	ANKRD66
0	1.3522	0.294	0.026	0	Epidermal_Mucous	cremb
0	1.32032	0.25	0.011	0	Epidermal_Mucous	inpp5d
0	1.31039	0.331	0.035	0	Epidermal_Mucous	nfatc2a
0	1.30735	0.307	0.005	0	Epidermal_Mucous	arhgef7a
0	1.30207	0.271	0.02	0	Epidermal_Mucous	UNC13B
0	1.28494	0.272	0.01	0	Epidermal_Mucous	gramd4a
0	1.27928	0.276	0.001	0	Epidermal_Mucous	si:ch73-208h1.1
0	1.26216	0.337	0.035	0	Epidermal_Mucous	plcg2
0	1.23531	0.209	0.002	0	Epidermal_Mucous	crp6
0	1.23163	0.154	0.004	0	Epidermal_Mucous	srrm4
0	1.21813	0.298	0.021	0	Epidermal_Mucous	fybb
0	1.19489	0.274	0.016	0	Epidermal_Mucous	CR396595.3
0	1.19178	0.242	0.009	0	Epidermal_Mucous	si:dkeyp-117b11.1
0	1.18264	0.178	0.008	0	Epidermal_Mucous	nol4la
0	1.17932	0.234	0.006	0	Epidermal_Mucous	fhdc1
0	1.16392	0.186	0.008	0	Epidermal_Mucous	pcbp3
0	1.16149	0.217	0.021	0	Epidermal_Mucous	tmc5
0	1.16096	0.237	0.018	0	Epidermal_Mucous	si:ch211-147k10.5
0	1.15164	0.121	0.003	0	Epidermal_Mucous	pvalb8
0	1.13222	0.236	0.004	0	Epidermal_Mucous	rgs4
0	1.13197	0.261	0.02	0	Epidermal_Mucous	camk1db
0	1.12605	0.258	0.01	0	Epidermal_Mucous	dnase1l4.1
0	1.10829	0.253	0.019	0	Epidermal_Mucous	spry2
0	1.10032	0.252	0.021	0	Epidermal_Mucous	kcnh6a
0	1.09785	0.261	0.026	0	Epidermal_Mucous	cd83
0	1.09239	0.234	0.01	0	Epidermal_Mucous	bzw2
0	1.07647	0.244	0.012	0	Epidermal_Mucous	itpr1a
0	1.07556	0.212	0.011	0	Epidermal_Mucous	gpx1b
0	1.06673	0.146	0.002	0	Epidermal_Mucous	gfral
0	1.0653	0.234	0.011	0	Epidermal_Mucous	btk
0	1.05929	0.272	0.032	0	Epidermal_Mucous	abca2
0	1.04138	0.232	0.01	0	Epidermal_Mucous	espn
0	1.0337	0.147	0.01	0	Epidermal_Mucous	stxbp5a
0	1.03331	0.153	0.007	0	Epidermal_Mucous	itpk1a
0	1.02477	0.23	0.029	0	Epidermal_Mucous	adgrl3.1
0	0.990944	0.27	0.035	0	Epidermal_Mucous	stx2b
0	0.977858	0.179	0.012	0	Epidermal_Mucous	cadpsa
0	0.975581	0.201	0.001	0	Epidermal_Mucous	gata2b
0	0.974791	0.229	0.012	0	Epidermal_Mucous	mctp2b
0	0.968156	0.192	0.007	0	Epidermal_Mucous	pik3r5
0	0.958234	0.141	0.004	0	Epidermal_Mucous	dkk2
0	0.950598	0.1	0.002	0	Epidermal_Mucous	ponzr5
0	0.94496	0.112	0.005	0	Epidermal_Mucous	vill
0	0.938978	0.215	0.006	0	Epidermal_Mucous	capn8
0	0.93725	0.211	0.009	0	Epidermal_Mucous	pik3cg
0	0.931709	0.106	0.001	0	Epidermal_Mucous	si:ch211-256e16.7
0	0.927643	0.179	0.001	0	Epidermal_Mucous	si:ch211-272h9.3
0	0.915461	0.19	0.002	0	Epidermal_Mucous	LO018605.2
0	0.90628	0.112	0.006	0	Epidermal_Mucous	bean1
0	0.901113	0.18	0.003	0	Epidermal_Mucous	si:dkey-28d5.14.1
0	0.900037	0.11	0.002	0	Epidermal_Mucous	myo15aa
0	0.891511	0.231	0.029	0	Epidermal_Mucous	dapp1
0	0.880051	0.114	0.007	0	Epidermal_Mucous	kcnab1a
0	0.844256	0.179	0.005	0	Epidermal_Mucous	si:ch211-282j17.10
0	0.827153	0.149	0.001	0	Epidermal_Mucous	BX293991.2
0	0.826689	0.188	0.016	0	Epidermal_Mucous	adgre9
0	0.819095	0.133	0.007	0	Epidermal_Mucous	apln
0	0.80453	0.155	0.003	0	Epidermal_Mucous	aff3
0	0.797685	0.19	0.021	0	Epidermal_Mucous	tox
0	0.791026	0.159	0.004	0	Epidermal_Mucous	cers6
0	0.789658	0.17	0.006	0	Epidermal_Mucous	si:dkey-83f18.4
0	0.787653	0.167	0.009	0	Epidermal_Mucous	zgc:194930
0	0.754829	0.156	0.013	0	Epidermal_Mucous	igsf9a
0	0.738262	0.139	0.002	0	Epidermal_Mucous	slc29a4
0	0.736086	0.152	0.004	0	Epidermal_Mucous	cers4b
0	0.725436	0.136	0.007	0	Epidermal_Mucous	si:dkey-14d8.20
0	0.71839	0.151	0.006	0	Epidermal_Mucous	CU914776.2
0	0.703401	0.136	0.003	0	Epidermal_Mucous	si:dkey-28d5.13
0	0.694942	0.119	0.004	0	Epidermal_Mucous	alox5a
0	0.676856	0.131	0.006	0	Epidermal_Mucous	gpr174
0	0.666698	0.106	0.004	0	Epidermal_Mucous	ppp3ca
0	0.655709	0.156	0.012	0	Epidermal_Mucous	cbarpb
0	0.644696	0.142	0.006	0	Epidermal_Mucous	prr15la
0	0.623944	0.166	0.015	0	Epidermal_Mucous	zgc:152774
0	0.622952	0.117	0.001	0	Epidermal_Mucous	si:ch211-189e2.3
0	0.617068	0.121	0.001	0	Epidermal_Mucous	si:ch211-270g19.5
0	0.614533	0.121	0.006	0	Epidermal_Mucous	FO681314.1
0	0.597839	0.12	0.008	0	Epidermal_Mucous	gng10
0	0.586492	0.116	0.002	0	Epidermal_Mucous	gna14a
0	0.574784	0.124	0.005	0	Epidermal_Mucous	tor4ab
0	0.560853	0.118	0.006	0	Epidermal_Mucous	CR354549.3
0	0.559747	0.124	0.007	0	Epidermal_Mucous	ftr87
0	0.559417	0.121	0.007	0	Epidermal_Mucous	si:ch211-112g6.4
0	0.542703	0.144	0.008	0	Epidermal_Mucous	mrvi1
0	0.539925	0.138	0.007	0	Epidermal_Mucous	pip5k1ba
0	0.537833	0.109	0.006	0	Epidermal_Mucous	arhgap12b
0	0.51638	0.105	0.002	0	Epidermal_Mucous	si:dkey-197j19.6
0	0.506754	0.106	0.004	0	Epidermal_Mucous	si:dkey-61f9.1.1
0	0.45121	0.111	0.002	0	Epidermal_Mucous	si:dkeyp-122a9.2
0	0.448987	0.101	0.001	0	Epidermal_Mucous	CABZ01063203.1
0	0.383632	0.1	0.003	0	Epidermal_Mucous	si:dkey-90l8.3
1.38477e-301	0.871823	0.197	0.023	3.37606e-297	Epidermal_Mucous	zgc:66473
1.42378e-299	1.36313	0.423	0.095	3.47117e-295	Epidermal_Mucous	plekha7a
3.18674e-295	1.86858	0.151	0.014	7.76928e-291	Epidermal_Mucous	CR759836.1
4.03121e-294	0.770491	0.166	0.017	9.82808e-290	Epidermal_Mucous	adcy5
2.02255e-289	0.727833	0.157	0.015	4.93097e-285	Epidermal_Mucous	si:ch211-225k7.3
4.4675e-287	0.818931	0.109	0.007	1.08918e-282	Epidermal_Mucous	ccl20a.3
2.9042e-283	1.7171	0.535	0.156	7.08043e-279	Epidermal_Mucous	mast2
8.81602e-280	1.61215	0.636	0.22	2.14934e-275	Epidermal_Mucous	camk2g2
1.67578e-279	0.459969	0.117	0.009	4.08555e-275	Epidermal_Mucous	mcf2lb
5.30011e-279	1.86315	0.149	0.014	1.29217e-274	Epidermal_Mucous	kcnd2
6.0722e-278	1.59297	0.447	0.112	1.4804e-273	Epidermal_Mucous	ABCA7
2.31421e-275	1.21415	0.291	0.051	5.64205e-271	Epidermal_Mucous	tp53bp2b
1.30363e-273	0.854026	0.147	0.014	3.17824e-269	Epidermal_Mucous	si:ch211-130m23.2
9.4077e-272	1.11638	0.15	0.015	2.2936e-267	Epidermal_Mucous	GNG12
8.77133e-267	0.515656	0.109	0.008	2.13845e-262	Epidermal_Mucous	zgc:158868
9.78616e-266	0.844087	0.143	0.014	2.38586e-261	Epidermal_Mucous	syt7a
1.89434e-264	0.981734	0.238	0.036	4.61839e-260	Epidermal_Mucous	grk5l
3.70187e-261	1.05965	0.308	0.058	9.02516e-257	Epidermal_Mucous	fnbp1b.1
4.47595e-255	1.09498	0.297	0.056	1.09124e-250	Epidermal_Mucous	pde10a
7.67267e-252	1.03418	0.293	0.055	1.8706e-247	Epidermal_Mucous	zbtb46
4.21294e-250	0.682702	0.161	0.018	1.02711e-245	Epidermal_Mucous	skap2
2.07842e-244	1.45455	0.613	0.211	5.06718e-240	Epidermal_Mucous	SEMA4F
6.58179e-240	0.607773	0.161	0.019	1.60464e-235	Epidermal_Mucous	frya
1.53008e-235	1.31398	0.398	0.1	3.73034e-231	Epidermal_Mucous	kalrnb
9.40204e-235	1.3315	0.367	0.087	2.29222e-230	Epidermal_Mucous	bcl2a
2.84982e-226	1.09075	0.357	0.083	6.94785e-222	Epidermal_Mucous	arhgef38
1.19865e-216	1.11295	0.136	0.015	2.92231e-212	Epidermal_Mucous	PIEZO2
2.96475e-216	0.765772	0.206	0.033	7.22805e-212	Epidermal_Mucous	fscn1a
2.60937e-214	0.964942	0.289	0.06	6.36164e-210	Epidermal_Mucous	lrch1
1.28701e-213	1.36646	0.556	0.197	3.13773e-209	Epidermal_Mucous	baiap2l1b
5.62402e-212	0.487194	0.124	0.013	1.37114e-207	Epidermal_Mucous	si:ch211-153b23.7
4.96401e-210	1.39999	0.835	0.472	1.21023e-205	Epidermal_Mucous	ralgapa2
2.05256e-207	0.826553	0.159	0.021	5.00413e-203	Epidermal_Mucous	RIMS2
6.75257e-207	1.53065	0.543	0.195	1.64628e-202	Epidermal_Mucous	camk2d1
3.48124e-205	1.05277	0.324	0.077	8.48726e-201	Epidermal_Mucous	spsb4a
2.74023e-203	1.23108	0.396	0.11	6.68067e-199	Epidermal_Mucous	mical2b
1.07201e-201	0.4997	0.103	0.009	2.61357e-197	Epidermal_Mucous	zgc:123295
2.83167e-198	0.901895	0.276	0.059	6.9036e-194	Epidermal_Mucous	rhogb
4.91262e-198	0.863266	0.262	0.054	1.1977e-193	Epidermal_Mucous	calm1b
6.83162e-198	1.50225	0.653	0.285	1.66555e-193	Epidermal_Mucous	add3a
8.83069e-197	0.687158	0.156	0.021	2.15292e-192	Epidermal_Mucous	traf1
1.14124e-195	0.593142	0.142	0.018	2.78234e-191	Epidermal_Mucous	dachb
2.21807e-189	0.976579	0.233	0.045	5.40766e-185	Epidermal_Mucous	eda
2.59284e-189	0.726618	0.178	0.028	6.32134e-185	Epidermal_Mucous	slc4a11
2.82046e-188	0.909763	0.265	0.057	6.87628e-184	Epidermal_Mucous	marcksl1b
3.36179e-187	0.541979	0.106	0.011	8.19605e-183	Epidermal_Mucous	npdc1a
1.43158e-186	1.73239	0.744	0.398	3.49019e-182	Epidermal_Mucous	il13ra1
2.4667e-179	0.804858	0.179	0.029	6.01381e-175	Epidermal_Mucous	pde9a
2.67426e-179	0.987969	0.277	0.063	6.51984e-175	Epidermal_Mucous	adgre10
2.2388e-178	1.65335	0.755	0.427	5.45819e-174	Epidermal_Mucous	stat3
1.00048e-177	1.23977	0.411	0.129	2.43917e-173	Epidermal_Mucous	cabin1
8.76431e-176	0.5473	0.151	0.022	2.13674e-171	Epidermal_Mucous	foxc1b
1.18547e-170	0.67783	0.141	0.02	2.89017e-166	Epidermal_Mucous	cdc42ep4a
5.67295e-168	1.59332	0.83	0.532	1.38307e-163	Epidermal_Mucous	mef2d
5.85131e-168	1.13882	0.408	0.124	1.42655e-163	Epidermal_Mucous	zgc:152670
2.17556e-166	0.608662	0.137	0.019	5.30401e-162	Epidermal_Mucous	pip5k1bb
2.04003e-165	0.724595	0.185	0.033	4.9736e-161	Epidermal_Mucous	alox12
2.32773e-160	0.597833	0.139	0.02	5.67501e-156	Epidermal_Mucous	scg3
7.61293e-159	0.760465	0.133	0.019	1.85603e-154	Epidermal_Mucous	rasgrp3
2.49742e-158	0.669413	0.177	0.032	6.08872e-154	Epidermal_Mucous	rasa3
3.56054e-157	1.09358	0.347	0.104	8.68059e-153	Epidermal_Mucous	grk4
1.6386e-156	1.22027	0.769	0.409	3.9949e-152	Epidermal_Mucous	cxadr
7.46534e-154	0.906769	0.216	0.047	1.82005e-149	Epidermal_Mucous	zfpm1
6.41595e-153	0.754523	0.252	0.06	1.56421e-148	Epidermal_Mucous	cacna1aa
1.63917e-152	0.494093	0.11	0.014	3.99631e-148	Epidermal_Mucous	LO017877.2
3.31938e-150	1.33153	0.432	0.156	8.09265e-146	Epidermal_Mucous	elovl6
2.55173e-149	1.19022	0.608	0.278	6.22112e-145	Epidermal_Mucous	gpatch8
7.14742e-149	1.0864	0.38	0.124	1.74254e-144	Epidermal_Mucous	abcc3
1.06694e-148	1.18992	0.491	0.192	2.6012e-144	Epidermal_Mucous	gpd2
1.60353e-147	0.628707	0.11	0.014	3.9094e-143	Epidermal_Mucous	cacna1bb
0	3.96544	0.813	0.388	0	Hematopoietic	lgmn
0	3.79823	0.389	0.025	0	Hematopoietic	cxcl19
0	3.39901	0.7	0.162	0	Hematopoietic	runx3
0	3.31663	0.516	0.034	0	Hematopoietic	grn1
0	3.30896	0.579	0.051	0	Hematopoietic	tfeb
0	3.27647	0.433	0.022	0	Hematopoietic	tppp
0	3.26918	0.8	0.483	0	Hematopoietic	ctsd
0	3.26098	0.666	0.16	0	Hematopoietic	enpp1
0	3.23018	0.666	0.011	0	Hematopoietic	slc7a7
0	3.19481	0.807	0.105	0	Hematopoietic	gnao1a
0	3.17079	0.76	0.01	0	Hematopoietic	ptprc
0	3.09589	0.547	0.015	0	Hematopoietic	mpeg1.1
0	3.04867	0.759	0.117	0	Hematopoietic	rarab
0	3.04476	0.898	0.69	0	Hematopoietic	ctsba
0	2.9988	0.635	0.007	0	Hematopoietic	spi1b
0	2.97844	0.791	0.279	0	Hematopoietic	slc15a4
0	2.97696	0.506	0.017	0	Hematopoietic	si:dkeyp-23e4.3
0	2.87909	0.777	0.399	0	Hematopoietic	ctsz
0	2.86956	0.479	0.021	0	Hematopoietic	si:dkey-5n18.1
0	2.83753	0.712	0.123	0	Hematopoietic	tcirg1b
0	2.79125	0.505	0.082	0	Hematopoietic	bcl2a
0	2.74938	0.758	0.307	0	Hematopoietic	ctsc
0	2.7222	0.557	0.012	0	Hematopoietic	OSBP2
0	2.64105	0.268	0.016	0	Hematopoietic	si:ch211-194m7.4
0	2.57066	0.613	0.085	0	Hematopoietic	cyth1b
0	2.56547	0.671	0.154	0	Hematopoietic	slc36a1
0	2.52224	0.552	0.089	0	Hematopoietic	sept9b
0	2.46514	0.603	0.252	0	Hematopoietic	btbd11b
0	2.46435	0.535	0.01	0	Hematopoietic	si:cabz01074946.1
0	2.46385	0.731	0.311	0	Hematopoietic	ctss2.2
0	2.45266	0.517	0.094	0	Hematopoietic	ctss2.1
0	2.39887	0.589	0.097	0	Hematopoietic	tmem104
0	2.38286	0.559	0.011	0	Hematopoietic	adgrg3
0	2.37965	0.608	0.104	0	Hematopoietic	krt18b
0	2.34929	0.52	0.01	0	Hematopoietic	ccr9a
0	2.34018	0.593	0.087	0	Hematopoietic	slc30a1a
0	2.33961	0.509	0.05	0	Hematopoietic	pde10a
0	2.33615	0.473	0.007	0	Hematopoietic	FNIP2
0	2.32541	0.548	0.074	0	Hematopoietic	si:ch73-383g2.1
0	2.32196	0.433	0.009	0	Hematopoietic	si:ch211-194m7.3
0	2.3135	0.811	0.419	0	Hematopoietic	galnt1
0	2.31243	0.207	0.006	0	Hematopoietic	ccl35.1
0	2.30172	0.568	0.073	0	Hematopoietic	parp8
0	2.26304	0.588	0.179	0	Hematopoietic	slc4a2b
0	2.25201	0.545	0.039	0	Hematopoietic	eno1a
0	2.24115	0.353	0.039	0	Hematopoietic	slc7a11
0	2.21241	0.455	0.011	0	Hematopoietic	c1qc
0	2.2089	0.851	0.565	0	Hematopoietic	psap
0	2.19593	0.407	0.021	0	Hematopoietic	prkcab
0	2.18129	0.5	0.006	0	Hematopoietic	trpv1
0	2.17442	0.55	0.004	0	Hematopoietic	itgae.2
0	2.16712	0.6	0.09	0	Hematopoietic	celf2
0	2.1562	0.568	0.147	0	Hematopoietic	rc3h2
0	2.14985	0.358	0.012	0	Hematopoietic	si:ch211-276a23.5
0	2.14774	0.571	0.146	0	Hematopoietic	arrb2b
0	2.14505	0.471	0.016	0	Hematopoietic	myo1g
0	2.14232	0.745	0.337	0	Hematopoietic	si:ch211-212k18.7
0	2.13732	0.516	0.062	0	Hematopoietic	gpr137c
0	2.10418	0.582	0.116	0	Hematopoietic	cxcr4b
0	2.10026	0.706	0.278	0	Hematopoietic	grna
0	2.0893	0.505	0.009	0	Hematopoietic	slc3a2a
0	2.07003	0.234	0.011	0	Hematopoietic	lgals3bpb
0	2.04883	0.396	0.008	0	Hematopoietic	slc43a2b
0	2.04862	0.455	0.062	0	Hematopoietic	arhgap24
0	2.04684	0.466	0.121	0	Hematopoietic	si:ch211-241b2.5
0	2.03151	0.482	0.026	0	Hematopoietic	dock10
0	2.02625	0.523	0.058	0	Hematopoietic	cbl
0	2.02235	0.508	0.075	0	Hematopoietic	pepd
0	2.00152	0.597	0.14	0	Hematopoietic	taok3a
0	2.00031	0.456	0.045	0	Hematopoietic	syne1b
0	1.99796	0.614	0.231	0	Hematopoietic	abhd12
0	1.99517	0.394	0.004	0	Hematopoietic	CU019662.1
0	1.99351	0.362	0.014	0	Hematopoietic	NPC2
0	1.97222	0.56	0.127	0	Hematopoietic	si:dkey-172h23.2
0	1.94715	0.651	0.244	0	Hematopoietic	slc49a4
0	1.94525	0.529	0.052	0	Hematopoietic	mpp1
0	1.93435	0.422	0.005	0	Hematopoietic	itgae.1
0	1.92968	0.647	0.2	0	Hematopoietic	abcc5
0	1.91855	0.47	0.009	0	Hematopoietic	zgc:64051
0	1.90769	0.491	0.026	0	Hematopoietic	ccdc88b
0	1.90605	0.464	0.078	0	Hematopoietic	si:dkey-32e23.4
0	1.88725	0.672	0.251	0	Hematopoietic	sgpl1
0	1.88625	0.373	0.007	0	Hematopoietic	smpd2a
0	1.88163	0.703	0.305	0	Hematopoietic	atp6v1ba
0	1.87943	0.636	0.224	0	Hematopoietic	bmp2k
0	1.87439	0.394	0.106	0	Hematopoietic	rasa4
0	1.86939	0.494	0.111	0	Hematopoietic	zgc:110239
0	1.86844	0.403	0.017	0	Hematopoietic	csf1ra
0	1.85233	0.416	0.007	0	Hematopoietic	lcp2a
0	1.85123	0.551	0.141	0	Hematopoietic	epb41l3b
0	1.84854	0.441	0.04	0	Hematopoietic	ncf4
0	1.83842	0.296	0.011	0	Hematopoietic	sftpbb
0	1.82966	0.439	0.015	0	Hematopoietic	prex1
0	1.82684	0.518	0.117	0	Hematopoietic	scpep1
0	1.82572	0.359	0.005	0	Hematopoietic	marco
0	1.81902	0.462	0.014	0	Hematopoietic	laptm5
0	1.81548	0.416	0.017	0	Hematopoietic	fybb
0	1.81197	0.286	0.052	0	Hematopoietic	vcanb
0	1.80549	0.505	0.153	0	Hematopoietic	rab32a
0	1.80054	0.508	0.112	0	Hematopoietic	plekho1b
0	1.78349	0.369	0.007	0	Hematopoietic	c1qb
0	1.76598	0.479	0.12	0	Hematopoietic	atp11c
0	1.75957	0.62	0.233	0	Hematopoietic	igf2r
0	1.7589	0.356	0.034	0	Hematopoietic	rgl1
0	1.75046	0.309	0.022	0	Hematopoietic	kcnab2a
0	1.7398	0.368	0.049	0	Hematopoietic	CR936442.1
0	1.72735	0.373	0.005	0	Hematopoietic	si:dkey-27i16.2
0	1.72735	0.312	0.002	0	Hematopoietic	slc2a6
0	1.72412	0.311	0.012	0	Hematopoietic	me1
0	1.71845	0.55	0.17	0	Hematopoietic	ptprea
0	1.70054	0.346	0.006	0	Hematopoietic	stoml3b
0	1.69924	0.143	0.007	0	Hematopoietic	nol4la
0	1.6951	0.39	0.003	0	Hematopoietic	cx32.2
0	1.69358	0.361	0.05	0	Hematopoietic	zeb2a
0	1.6929	0.429	0.056	0	Hematopoietic	srgn
0	1.68523	0.446	0.072	0	Hematopoietic	trim105
0	1.68487	0.381	0.007	0	Hematopoietic	CABZ01056054.1
0	1.68245	0.246	0.006	0	Hematopoietic	ncf1
0	1.67814	0.364	0.063	0	Hematopoietic	tns3.2
0	1.67349	0.51	0.148	0	Hematopoietic	znrf2b
0	1.66112	0.402	0.055	0	Hematopoietic	fnbp1b.1
0	1.65849	0.309	0.008	0	Hematopoietic	acp5a
0	1.65371	0.733	0.352	0	Hematopoietic	abca1b
0	1.6452	0.255	0.005	0	Hematopoietic	BX511128.3
0	1.63573	0.595	0.241	0	Hematopoietic	psd3l
0	1.63565	0.396	0.073	0	Hematopoietic	tns3.1
0	1.63514	0.482	0.117	0	Hematopoietic	dnase2
0	1.62381	0.241	0.003	0	Hematopoietic	dipk1ab
0	1.6204	0.329	0.068	0	Hematopoietic	si:dkey-28k24.2.2
0	1.6092	0.52	0.156	0	Hematopoietic	fam53b
0	1.60218	0.294	0.002	0	Hematopoietic	rab38b
0	1.5947	0.444	0.133	0	Hematopoietic	prcp
0	1.59067	0.387	0.002	0	Hematopoietic	itgb7
0	1.5896	0.322	0.004	0	Hematopoietic	si:ch211-147m6.1
0	1.58035	0.333	0.005	0	Hematopoietic	fermt3b
0	1.57548	0.231	0.005	0	Hematopoietic	tnfrsf9b
0	1.5705	0.328	0.004	0	Hematopoietic	havcr1
0	1.56914	0.323	0.034	0	Hematopoietic	mertka
0	1.56825	0.368	0.007	0	Hematopoietic	si:ch211-153b23.7
0	1.56633	0.367	0.011	0	Hematopoietic	fcer1gl
0	1.55858	0.331	0.018	0	Hematopoietic	sdr16c5b
0	1.55253	0.353	0.044	0	Hematopoietic	abcb6b
0	1.55048	0.284	0.002	0	Hematopoietic	FQ311879.1
0	1.54172	0.321	0.004	0	Hematopoietic	c1qa
0	1.53985	0.284	0.037	0	Hematopoietic	mcf2la
0	1.53301	0.387	0.09	0	Hematopoietic	pde3b
0	1.5251	0.633	0.277	0	Hematopoietic	atp6ap1b
0	1.51941	0.379	0.011	0	Hematopoietic	mitfb
0	1.51759	0.527	0.179	0	Hematopoietic	ctsh
0	1.51722	0.346	0.02	0	Hematopoietic	qkib
0	1.5051	0.561	0.192	0	Hematopoietic	atp6v1h
0	1.50351	0.376	0.049	0	Hematopoietic	adgrg1.1
0	1.50157	0.591	0.211	0	Hematopoietic	slc6a6b
0	1.49887	0.399	0.098	0	Hematopoietic	si:dkeyp-19e1.3
0	1.48951	0.329	0.003	0	Hematopoietic	cmklr1
0	1.47403	0.602	0.241	0	Hematopoietic	atp6ap2
0	1.46445	0.24	0.037	0	Hematopoietic	zeb1b
0	1.46293	0.331	0.038	0	Hematopoietic	zgc:153184
0	1.46093	0.302	0.047	0	Hematopoietic	fnbp1b
0	1.45845	0.352	0.052	0	Hematopoietic	zbtb46
0	1.45311	0.329	0.037	0	Hematopoietic	pld3
0	1.45299	0.248	0.005	0	Hematopoietic	mfap4
0	1.44672	0.347	0.06	0	Hematopoietic	eepd1
0	1.43763	0.43	0.088	0	Hematopoietic	elmo1
0	1.43673	0.285	0.041	0	Hematopoietic	FO704661.1
0	1.43088	0.405	0.074	0	Hematopoietic	slc12a9
0	1.42977	0.281	0.008	0	Hematopoietic	arhgap22
0	1.42248	0.412	0.079	0	Hematopoietic	pip4k2aa
0	1.42122	0.309	0.024	0	Hematopoietic	cd83
0	1.4187	0.3	0.01	0	Hematopoietic	spi1a
0	1.41854	0.474	0.105	0	Hematopoietic	scarb2a
0	1.40275	0.33	0.004	0	Hematopoietic	fermt3a
0	1.40253	0.341	0.03	0	Hematopoietic	dock4b
0	1.40112	0.342	0.009	0	Hematopoietic	si:dkey-262k9.4
0	1.40079	0.436	0.099	0	Hematopoietic	tpp1
0	1.39766	0.429	0.117	0	Hematopoietic	tnfrsf1b
0	1.37323	0.429	0.094	0	Hematopoietic	dock11
0	1.36796	0.3	0.027	0	Hematopoietic	si:ch73-92i20.1
0	1.35636	0.326	0.016	0	Hematopoietic	disc1
0	1.34551	0.344	0.028	0	Hematopoietic	BX890572.2
0	1.33866	0.321	0.016	0	Hematopoietic	lyn
0	1.33794	0.306	0.028	0	Hematopoietic	vsir
0	1.32993	0.223	0.008	0	Hematopoietic	nol4lb
0	1.32941	0.244	0.003	0	Hematopoietic	cd4-1
0	1.32474	0.305	0.003	0	Hematopoietic	fcer1g
0	1.31128	0.281	0.009	0	Hematopoietic	ptk2ba
0	1.30691	0.258	0.005	0	Hematopoietic	dok2
0	1.30214	0.285	0.006	0	Hematopoietic	csf2rb
0	1.30164	0.299	0.002	0	Hematopoietic	il10ra
0	1.30087	0.305	0.012	0	Hematopoietic	FP085398.1
0	1.29221	0.385	0.088	0	Hematopoietic	slc44a2
0	1.2865	0.225	0.007	0	Hematopoietic	zgc:174904
0	1.27754	0.291	0.029	0	Hematopoietic	unm-hu7910
0	1.27712	0.306	0.043	0	Hematopoietic	slc26a11
0	1.27088	0.249	0.009	0	Hematopoietic	fgl2a
0	1.26728	0.276	0.004	0	Hematopoietic	syk
0	1.26624	0.173	0.001	0	Hematopoietic	cxcr1
0	1.25491	0.235	0.003	0	Hematopoietic	cfbl
0	1.25186	0.29	0.019	0	Hematopoietic	ano5a
0	1.24661	0.228	0.003	0	Hematopoietic	ENSDARG00000043475
0	4.56211	0.971	0.103	0	Mesenchymal	col6a3.1
0	4.23223	0.928	0.053	0	Mesenchymal	col6a1
0	4.05269	0.58	0.12	0	Mesenchymal	and2
0	3.91604	0.711	0.073	0	Mesenchymal	tnc
0	3.55691	0.873	0.034	0	Mesenchymal	col6a2
0	3.48084	0.761	0.037	0	Mesenchymal	DAB2
0	3.4521	0.954	0.222	0	Mesenchymal	col12a1b
0	3.26412	0.97	0.483	0	Mesenchymal	col1a1a
0	3.09003	0.544	0.094	0	Mesenchymal	abi3bpb
0	3.07236	0.943	0.256	0	Mesenchymal	col12a1a
0	3.02697	0.209	0.011	0	Mesenchymal	si:ch211-106h4.12
0	3.00142	0.785	0.057	0	Mesenchymal	col11a1b
0	2.97627	0.616	0.067	0	Mesenchymal	ecrg4a
0	2.93339	0.651	0.084	0	Mesenchymal	f3b
0	2.9205	0.741	0.186	0	Mesenchymal	serpine1
0	2.91372	0.915	0.221	0	Mesenchymal	col5a2a
0	2.91326	0.974	0.296	0	Mesenchymal	col5a1
0	2.84334	0.924	0.179	0	Mesenchymal	fstl1b
0	2.80208	0.726	0.034	0	Mesenchymal	itga9
0	2.77063	0.955	0.399	0	Mesenchymal	col1a2
0	2.73661	0.563	0.182	0	Mesenchymal	cygb1
0	2.61146	0.619	0.191	0	Mesenchymal	ccn1
0	2.55916	0.937	0.383	0	Mesenchymal	col1a1b
0	2.55571	0.684	0.015	0	Mesenchymal	dchs1a
0	2.53076	0.753	0.013	0	Mesenchymal	pdgfrb
0	2.46082	0.805	0.088	0	Mesenchymal	antxr1c
0	2.45268	0.672	0.031	0	Mesenchymal	slit3
0	2.44657	0.615	0.056	0	Mesenchymal	c1qtnf5
0	2.37258	0.827	0.162	0	Mesenchymal	col16a1
0	2.35515	0.517	0.025	0	Mesenchymal	robo3
0	2.34273	0.801	0.038	0	Mesenchymal	lrp1aa
0	2.33757	0.618	0.02	0	Mesenchymal	thbs4b
0	2.29933	0.729	0.042	0	Mesenchymal	cacna1g
0	2.2942	0.655	0.021	0	Mesenchymal	zcchc24
0	2.29346	0.866	0.175	0	Mesenchymal	mmp14a
0	2.26825	0.861	0.21	0	Mesenchymal	mmp2
0	2.22894	0.614	0.044	0	Mesenchymal	tnfaip6
0	2.21406	0.716	0.318	0	Mesenchymal	and1
0	2.1948	0.608	0.061	0	Mesenchymal	lum
0	2.18008	0.953	0.312	0	Mesenchymal	cd81a
0	2.17944	0.542	0.006	0	Mesenchymal	si:ch211-263k4.2
0	2.16541	0.417	0.025	0	Mesenchymal	kirrel3a
0	2.13545	0.707	0.138	0	Mesenchymal	dkk3b
0	2.09985	0.532	0.085	0	Mesenchymal	aspn
0	2.08111	0.733	0.042	0	Mesenchymal	gpm6bb
0	2.07484	0.762	0.187	0	Mesenchymal	serpinh1b
0	2.05746	0.699	0.038	0	Mesenchymal	loxl2b
0	2.04817	0.748	0.173	0	Mesenchymal	col11a1a
0	2.03984	0.556	0.019	0	Mesenchymal	npr1a
0	2.03696	0.768	0.176	0	Mesenchymal	plpp3
0	2.03487	0.846	0.303	0	Mesenchymal	mmp14b
0	2.03121	0.249	0.01	0	Mesenchymal	si:ch211-67e16.11
0	2.02346	0.886	0.466	0	Mesenchymal	postnb
0	2.01742	0.748	0.077	0	Mesenchymal	krt18b
0	1.99859	0.393	0.01	0	Mesenchymal	cyp26b1
0	1.97624	0.697	0.041	0	Mesenchymal	pmp22a
0	1.96577	0.69	0.074	0	Mesenchymal	hmcn2.1
0	1.95343	0.57	0.012	0	Mesenchymal	col27a1b
0	1.9291	0.512	0.038	0	Mesenchymal	slc38a3a
0	1.92835	0.507	0.036	0	Mesenchymal	cspg4
0	1.91748	0.822	0.164	0	Mesenchymal	antxr2a
0	1.90944	0.333	0.047	0	Mesenchymal	cntfr
0	1.90449	0.492	0.006	0	Mesenchymal	glis1b
0	1.90157	0.477	0.022	0	Mesenchymal	si:dkey-12l12.1
0	1.89884	0.312	0.016	0	Mesenchymal	TNC
0	1.88945	0.66	0.042	0	Mesenchymal	pdgfra
0	1.87867	0.341	0.011	0	Mesenchymal	hapln1a
0	1.86692	0.655	0.031	0	Mesenchymal	loxl3b
0	1.84725	0.604	0.087	0	Mesenchymal	plxna3
0	1.84578	0.541	0.039	0	Mesenchymal	adamts3
0	1.8457	0.79	0.164	0	Mesenchymal	msna
0	1.84189	0.631	0.084	0	Mesenchymal	nfatc1
0	1.83121	0.352	0.039	0	Mesenchymal	angptl7
0	1.82205	0.516	0.012	0	Mesenchymal	fgfrl1a
0	1.8142	0.718	0.213	0	Mesenchymal	gli2a
0	1.80465	0.577	0.086	0	Mesenchymal	edil3a
0	1.80234	0.607	0.068	0	Mesenchymal	tenm3
0	1.7984	0.733	0.144	0	Mesenchymal	tns1b
0	1.79702	0.481	0.019	0	Mesenchymal	tns2a
0	1.79281	0.424	0.142	0	Mesenchymal	runx2a
0	1.77584	0.324	0.016	0	Mesenchymal	dacha
0	1.77372	0.549	0.024	0	Mesenchymal	f13a1b
0	1.77134	0.624	0.069	0	Mesenchymal	thbs3a
0	1.75777	0.604	0.022	0	Mesenchymal	mfap2
0	1.75168	0.636	0.133	0	Mesenchymal	rcn3
0	1.75072	0.676	0.086	0	Mesenchymal	FP102018.1
0	1.74818	0.679	0.102	0	Mesenchymal	lpar1
0	1.74797	0.684	0.113	0	Mesenchymal	pard3bb
0	1.72438	0.62	0.048	0	Mesenchymal	mxra8b
0	1.72411	0.262	0.009	0	Mesenchymal	col6a4a
0	1.72162	0.263	0.01	0	Mesenchymal	cdh11
0	1.71901	0.124	0.025	0	Mesenchymal	ifitm5
0	1.70776	0.448	0.007	0	Mesenchymal	thbs2b
0	1.70166	0.816	0.407	0	Mesenchymal	mdka
0	1.69639	0.751	0.157	0	Mesenchymal	serinc5
0	1.67444	0.575	0.013	0	Mesenchymal	bicc1a
0	1.66429	0.76	0.325	0	Mesenchymal	arhgef1b
0	1.64846	0.495	0.067	0	Mesenchymal	klhl29
0	1.64244	0.608	0.103	0	Mesenchymal	plod1a
0	1.64127	0.539	0.012	0	Mesenchymal	aebp1
0	1.63775	0.391	0.011	0	Mesenchymal	igf2b
0	1.63335	0.476	0.018	0	Mesenchymal	cx43
0	1.62314	0.584	0.089	0	Mesenchymal	angptl2b
0	1.62025	0.567	0.019	0	Mesenchymal	cdh2
0	1.6162	0.443	0.032	0	Mesenchymal	CR936442.1
0	1.60634	0.762	0.194	0	Mesenchymal	ptprga
0	1.60131	0.567	0.035	0	Mesenchymal	fbn2b
0	1.60097	0.704	0.176	0	Mesenchymal	cfl1
0	1.58568	0.243	0.009	0	Mesenchymal	postna
0	1.58539	0.609	0.068	0	Mesenchymal	cpe
0	1.58504	0.684	0.162	0	Mesenchymal	p3h4
0	1.57635	0.534	0.028	0	Mesenchymal	adgra2
0	1.5755	0.556	0.013	0	Mesenchymal	colec12
0	1.57093	0.683	0.154	0	Mesenchymal	fkbp9
0	1.55815	0.671	0.102	0	Mesenchymal	dcn
0	1.55206	0.712	0.146	0	Mesenchymal	bmp1a
0	1.54984	0.47	0.011	0	Mesenchymal	ptx3a
0	1.54926	0.274	0.016	0	Mesenchymal	mfap5
0	1.54642	0.575	0.055	0	Mesenchymal	sema4c
0	1.53069	0.327	0.033	0	Mesenchymal	cxcl12a
0	1.5191	0.603	0.08	0	Mesenchymal	ece2b
0	1.51196	0.419	0.007	0	Mesenchymal	CR848833.1
0	1.50539	0.665	0.124	0	Mesenchymal	myo1b
0	1.50012	0.337	0.018	0	Mesenchymal	si:ch1073-459j12.1
0	1.4986	0.434	0.014	0	Mesenchymal	sfrp1b
0	1.49151	0.498	0.006	0	Mesenchymal	ednraa
0	1.48811	0.737	0.256	0	Mesenchymal	tcf7l1a
0	1.48542	0.696	0.193	0	Mesenchymal	myo18ab
0	1.4798	0.468	0.031	0	Mesenchymal	CR848683.2
0	1.47718	0.337	0.023	0	Mesenchymal	lepb
0	1.4757	0.461	0.05	0	Mesenchymal	si:dkey-28k24.2.2
0	1.47409	0.496	0.054	0	Mesenchymal	phldb1a
0	1.47282	0.404	0.051	0	Mesenchymal	TMEM132C
0	1.46851	0.732	0.203	0	Mesenchymal	bcar1
0	1.46446	0.204	0.007	0	Mesenchymal	tnn
0	1.46359	0.503	0.017	0	Mesenchymal	efemp2a
0	1.45985	0.632	0.099	0	Mesenchymal	tcf12
0	1.45655	0.581	0.069	0	Mesenchymal	tshz3b
0	1.45235	0.466	0.01	0	Mesenchymal	sgcd
0	1.44551	0.444	0.029	0	Mesenchymal	fibinb
0	1.43555	0.536	0.02	0	Mesenchymal	gulp1a
0	1.4335	0.522	0.183	0	Mesenchymal	vcana
0	1.43052	0.595	0.044	0	Mesenchymal	pcdh2g28
0	1.42518	0.589	0.069	0	Mesenchymal	gli3
0	1.42189	0.405	0.054	0	Mesenchymal	timp2b
0	1.41145	0.517	0.064	0	Mesenchymal	zgc:154058
0	1.39788	0.526	0.036	0	Mesenchymal	nrp2a
0	1.39706	0.537	0.03	0	Mesenchymal	si:ch211-133n4.4
0	1.39025	0.526	0.009	0	Mesenchymal	lama4
0	1.38949	0.568	0.103	0	Mesenchymal	col2a1b
0	1.38905	0.484	0.038	0	Mesenchymal	dbn1
0	1.3888	0.802	0.32	0	Mesenchymal	htra1b
0	1.38855	0.522	0.052	0	Mesenchymal	osbpl10b
0	1.38786	0.742	0.281	0	Mesenchymal	iqsec1b
0	1.37847	0.476	0.086	0	Mesenchymal	efnb3b
0	1.37502	0.594	0.093	0	Mesenchymal	rrbp1b
0	1.3715	0.475	0.016	0	Mesenchymal	xirp2a
0	1.36999	0.306	0.025	0	Mesenchymal	fgl1
0	1.36791	0.7	0.165	0	Mesenchymal	fndc3ba
0	1.36308	0.507	0.037	0	Mesenchymal	serpinf1
0	1.35782	0.391	0.032	0	Mesenchymal	pdzrn3b
0	1.3553	0.666	0.205	0	Mesenchymal	rbms3
0	1.35246	0.639	0.159	0	Mesenchymal	cd82a
0	1.3511	0.58	0.098	0	Mesenchymal	prickle1b
0	1.34791	0.717	0.28	0	Mesenchymal	crim1
0	1.34639	0.305	0.029	0	Mesenchymal	IGLON5
0	1.34579	0.407	0.016	0	Mesenchymal	fgfr1b
0	1.34039	0.233	0.037	0	Mesenchymal	ncam1a
0	1.33893	0.746	0.339	0	Mesenchymal	gse1
0	1.33876	0.76	0.244	0	Mesenchymal	igf1rb
0	1.33424	0.43	0.06	0	Mesenchymal	ltbp1
0	1.32853	0.531	0.093	0	Mesenchymal	prickle2b
0	1.32155	0.393	0.028	0	Mesenchymal	nid1a
0	1.32151	0.307	0.029	0	Mesenchymal	tgfbi
0	1.31537	0.376	0.007	0	Mesenchymal	loxl2a
0	1.30855	0.894	0.513	0	Mesenchymal	krt8
0	1.29871	0.527	0.085	0	Mesenchymal	dip2ca
0	1.29773	0.873	0.633	0	Mesenchymal	ppib
0	1.29583	0.469	0.016	0	Mesenchymal	SCARF2
0	1.29316	0.413	0.035	0	Mesenchymal	vcanb
0	1.29216	0.331	0.006	0	Mesenchymal	bhmt
0	1.29118	0.36	0.076	0	Mesenchymal	spon1b
0	1.29035	0.404	0.014	0	Mesenchymal	lrrc15
0	1.28658	0.224	0.019	0	Mesenchymal	ntn1a
0	1.28197	0.849	0.47	0	Mesenchymal	neo1a
0	1.27228	0.386	0.02	0	Mesenchymal	ARHGEF25
0	1.27133	0.394	0.048	0	Mesenchymal	pappaa
0	1.26932	0.53	0.036	0	Mesenchymal	selenon
0	1.26507	0.603	0.175	0	Mesenchymal	prkd3
0	1.26435	0.433	0.011	0	Mesenchymal	CT476811.1
0	1.26213	0.403	0.011	0	Mesenchymal	fam110b
0	1.25878	0.472	0.009	0	Mesenchymal	col6a3
0	1.25703	0.272	0.014	0	Mesenchymal	itga11b
0	1.25583	0.462	0.079	0	Mesenchymal	celf2
0	1.24966	0.162	0.013	0	Mesenchymal	ebf3a
0	1.24891	0.589	0.119	0	Mesenchymal	atrnl1b
0	1.24776	0.487	0.137	0	Mesenchymal	ogna
0	1.24299	0.264	0.025	0	Mesenchymal	nrxn2a
0	1.24279	0.838	0.623	0	Mesenchymal	cux1a
0	1.23966	0.963	0.697	0	Mesenchymal	pleca
0	7.27121	0.707	0.034	0	Pigment	CABZ01021592.1
0	4.24735	0.885	0.003	0	Pigment	trpm1b
0	3.92033	0.592	0.014	0	Pigment	si:dkey-251i10.2
0	3.78572	0.586	0.005	0	Pigment	plin6
0	3.72815	0.859	0.004	0	Pigment	mlpha
0	3.62997	0.738	0.028	0	Pigment	CR848833.1
0	3.62148	0.843	0.021	0	Pigment	pcbp4
0	3.60039	0.618	0.002	0	Pigment	bscl2l
0	3.58066	0.503	0.013	0	Pigment	si:ch211-251b21.1
0	3.46483	0.88	0.106	0	Pigment	myo5aa
0	3.14912	0.838	0.061	0	Pigment	cspg4
0	3.12489	0.728	0.005	0	Pigment	slc2a11b
0	3.10645	0.623	0.028	0	Pigment	scarb1
0	3.03204	0.749	0.013	0	Pigment	il16
0	3.00777	0.455	0.002	0	Pigment	bco2b
0	2.88231	0.859	0.078	0	Pigment	gpm6bb
0	2.86842	0.534	0.003	0	Pigment	gch2
0	2.84136	0.461	0.002	0	Pigment	pax7b
0	2.81719	0.482	0.008	0	Pigment	itpk1a
0	2.80356	0.56	0.003	0	Pigment	aox5
0	2.78447	0.429	0.011	0	Pigment	asip2b
0	2.77355	0.482	0.001	0	Pigment	mc5ra
0	2.72735	0.455	0.001	0	Pigment	slc22a7a
0	2.68954	0.644	0.012	0	Pigment	ank2b
0	2.61632	0.696	0.059	0	Pigment	plxdc2
0	2.60503	0.728	0.051	0	Pigment	CU138533.1
0	2.59764	0.696	0.028	0	Pigment	ppfia2
0	2.59072	0.686	0.017	0	Pigment	pttg1ipb
0	2.57537	0.576	0.023	0	Pigment	csf1ra
0	2.56985	0.686	0.003	0	Pigment	gpm6ab
0	2.54348	0.44	0.003	0	Pigment	CABZ01030033.1
0	2.50551	0.623	0.02	0	Pigment	uraha
0	2.48673	0.487	0.007	0	Pigment	tmeff2b
0	2.47791	0.775	0.071	0	Pigment	sptbn1
0	2.46035	0.749	0.043	0	Pigment	tns2a
0	2.45627	0.45	0.003	0	Pigment	pax7a
0	2.43474	0.555	0.001	0	Pigment	slc2a15a
0	2.41148	0.613	0.02	0	Pigment	prtfdc1
0	2.39468	0.602	0.007	0	Pigment	ablim3
0	2.38903	0.665	0.011	0	Pigment	syngr1a
0	2.38074	0.639	0.003	0	Pigment	arhgef33
0	2.3665	0.513	0.024	0	Pigment	bco1
0	2.32497	0.597	0.001	0	Pigment	pcdh10a
0	2.31905	0.66	0.004	0	Pigment	fmn2a
0	2.27936	0.545	0.015	0	Pigment	yjefn3
0	2.2411	0.471	0.005	0	Pigment	CDK18
0	2.23688	0.581	0.038	0	Pigment	si:ch211-286o17.1
0	2.23175	0.55	0.001	0	Pigment	slc2a15b
0	2.20503	0.602	0.035	0	Pigment	rtn1b
0	2.18705	0.623	0.001	0	Pigment	ednrba
0	2.18159	0.634	0.014	0	Pigment	trpv1
0	2.14923	0.675	0.005	0	Pigment	rab34b
0	2.12497	0.482	0.001	0	Pigment	cax1
0	2.12362	0.518	0.017	0	Pigment	adcy5
0	2.10816	0.466	0	0	Pigment	si:ch73-389b16.1
0	2.09228	0.461	0.002	0	Pigment	tmem130
0	2.07778	0.518	0.006	0	Pigment	pcdh9
0	2.03427	0.618	0.029	0	Pigment	bace2
0	2.02644	0.246	0.004	0	Pigment	oacyl
0	1.98098	0.487	0.003	0	Pigment	prnpb
0	1.90153	0.597	0.036	0	Pigment	arhgap31
0	1.87466	0.267	0.001	0	Pigment	dgat2
0	1.73967	0.513	0.001	0	Pigment	gja5b
0	1.73864	0.555	0.03	0	Pigment	lamb1b
0	1.73267	0.534	0.003	0	Pigment	si:dkey-24c2.9
0	1.71819	0.508	0.001	0	Pigment	tfap2e
0	1.66812	0.476	0.009	0	Pigment	itga1
0	1.66109	0.419	0.002	0	Pigment	sncga
0	1.63688	0.33	0.006	0	Pigment	CHST8
0	1.62312	0.429	0.001	0	Pigment	pax3a
0	1.60977	0.524	0.028	0	Pigment	sash1b
0	1.60375	0.34	0.008	0	Pigment	tnfaip2a
0	1.59413	0.445	0.003	0	Pigment	kif26aa
0	1.56484	0.414	0.016	0	Pigment	MYADM.1
0	1.56348	0.482	0.007	0	Pigment	agtrap
0	1.52723	0.518	0.023	0	Pigment	kank2
0	1.52637	0.325	0	0	Pigment	mlphb
0	1.5067	0.194	0.003	0	Pigment	zgc:91968
0	1.4795	0.319	0.003	0	Pigment	si:dkey-73n8.3
0	1.47792	0.408	0.005	0	Pigment	syt11a
0	1.46916	0.372	0.009	0	Pigment	adgrb3
0	1.45486	0.382	0.014	0	Pigment	col4a2
0	1.44458	0.298	0.003	0	Pigment	bcl11ab
0	1.42591	0.33	0.004	0	Pigment	pnp4a
0	1.41479	0.429	0.021	0	Pigment	disc1
0	1.41084	0.408	0.012	0	Pigment	si:dkey-106n21.1
0	1.40324	0.466	0.001	0	Pigment	sox10
0	1.37928	0.372	0.013	0	Pigment	sox5
0	1.37608	0.44	0.015	0	Pigment	FNIP2
0	1.37048	0.414	0.01	0	Pigment	col4a1
0	1.36835	0.414	0.002	0	Pigment	cdk15
0	1.36596	0.178	0.002	0	Pigment	dct
0	1.36073	0.466	0.015	0	Pigment	rtn1a
0	1.35472	0.387	0.011	0	Pigment	slc4a10a
0	1.35059	0.393	0.017	0	Pigment	neurl1b
0	1.35017	0.366	0.003	0	Pigment	zgc:110789
0	1.33085	0.283	0.005	0	Pigment	shisa8b
0	1.3275	0.293	0.006	0	Pigment	slc24a4a
0	1.31357	0.241	0.007	0	Pigment	dram2a
0	1.30434	0.204	0.003	0	Pigment	slc45a2
0	1.27495	0.356	0.002	0	Pigment	gpx3
0	1.27151	0.346	0.013	0	Pigment	CABZ01026153.1
0	1.25127	0.429	0.017	0	Pigment	FP085398.1
0	1.23666	0.346	0.001	0	Pigment	FP236542.1
0	1.23493	0.387	0.011	0	Pigment	CABZ01043952.1
0	1.22341	0.141	0.001	0	Pigment	tyrp1a
0	1.22008	0.403	0.011	0	Pigment	CPNE8
0	1.21551	0.262	0.003	0	Pigment	rasef
0	1.20805	0.366	0.015	0	Pigment	BX957346.1
0	1.1951	0.361	0.007	0	Pigment	gpr143
0	1.16047	0.288	0.01	0	Pigment	flncb
0	1.05882	0.11	0.001	0	Pigment	entpd3
0	1.01844	0.335	0.005	0	Pigment	gramd2aa
0	1.01366	0.298	0.003	0	Pigment	ttyh2l
0	0.979001	0.272	0.002	0	Pigment	tyr
0	0.974216	0.272	0.007	0	Pigment	GNAZ
0	0.948801	0.267	0.008	0	Pigment	phyhd1
0	0.939406	0.272	0.002	0	Pigment	mitfa
0	0.929186	0.288	0.006	0	Pigment	palm1b
0	0.921978	0.267	0.008	0	Pigment	BX005154.1
0	0.848687	0.293	0	0	Pigment	mon1ba
0	0.787198	0.251	0.007	0	Pigment	mmp15b
0	0.777991	0.251	0.007	0	Pigment	spns3
0	0.77748	0.22	0.003	0	Pigment	si:dkey-238d18.4
0	0.760777	0.215	0.004	0	Pigment	CABZ01087415.1
0	0.753617	0.22	0	0	Pigment	opn7c
0	0.751332	0.157	0	0	Pigment	foxd3
0	0.750986	0.152	0.002	0	Pigment	slc30a8
0	0.750355	0.194	0.004	0	Pigment	cyb561a3b
0	0.721879	0.188	0.001	0	Pigment	tspan10
0	0.71963	0.178	0.002	0	Pigment	gnb5b
0	0.673436	0.199	0.004	0	Pigment	si:ch211-241f5.3
0	0.627903	0.152	0.001	0	Pigment	NPFFR2
0	0.591361	0.126	0.001	0	Pigment	mkxb
0	0.590688	0.215	0.001	0	Pigment	rpe65c
0	0.587728	0.225	0.001	0	Pigment	gal3st1a
0	0.566634	0.188	0.001	0	Pigment	rab27b
0	0.498747	0.11	0.001	0	Pigment	CSDC2
0	0.497256	0.204	0.002	0	Pigment	syngr2b
0	0.482747	0.141	0.001	0	Pigment	lim2.2
0	0.415155	0.105	0.001	0	Pigment	rassf2b
0	0.379457	0.11	0.001	0	Pigment	myh7bb
0	0.354058	0.115	0	0	Pigment	BX510657.1
0	0.268652	0.115	0.001	0	Pigment	emp3b
7.96584e-299	0.363222	0.141	0.002	1.94207e-294	Pigment	sez6a
6.01528e-297	1.28783	0.403	0.02	1.46652e-292	Pigment	fam102aa
1.86532e-293	0.755817	0.126	0.002	4.54765e-289	Pigment	tm4sf18
2.71938e-288	0.866065	0.293	0.011	6.62985e-284	Pigment	st8sia6
5.10242e-287	0.513618	0.162	0.003	1.24397e-282	Pigment	cilp2
1.4064e-284	1.90781	0.555	0.04	3.42881e-280	Pigment	zeb1b
1.43109e-282	1.22596	0.471	0.029	3.48899e-278	Pigment	prnprs3
1.94025e-276	1.82587	0.366	0.018	4.73033e-272	Pigment	ahrrb
1.80176e-274	1.44688	0.382	0.02	4.39268e-270	Pigment	soga1
1.18096e-268	1.09439	0.283	0.011	2.87918e-264	Pigment	pxdc1b
1.37286e-265	2.17281	0.623	0.055	3.34703e-261	Pigment	zeb2a
1.87191e-265	1.47241	0.429	0.026	4.56371e-261	Pigment	qkib
1.26844e-264	1.08479	0.257	0.009	3.09246e-260	Pigment	zdhhc2
9.89711e-264	0.382398	0.115	0.002	2.41292e-259	Pigment	fez1
1.43529e-263	2.04764	0.23	0.008	3.49923e-259	Pigment	mtbl
1.00432e-262	1.21765	0.325	0.015	2.44853e-258	Pigment	si:ch73-366l1.5
1.44226e-259	1.92373	0.623	0.056	3.51623e-255	Pigment	plxna1a
9.38395e-258	1.36685	0.351	0.018	2.28781e-253	Pigment	lrch2
4.39104e-256	1.04546	0.283	0.012	1.07054e-251	Pigment	rhoq
1.60936e-254	0.511139	0.173	0.004	3.92362e-250	Pigment	ppfibp1a
2.45373e-254	1.46758	0.419	0.026	5.98219e-250	Pigment	lrrfip1b
1.66204e-253	0.707072	0.22	0.007	4.05206e-249	Pigment	lgals2a
7.73926e-250	1.41294	0.419	0.026	1.88683e-245	Pigment	zgc:92161
1.64709e-247	1.21949	0.408	0.025	4.0156e-243	Pigment	acap3a
8.31418e-247	1.71482	0.508	0.039	2.027e-242	Pigment	tcirg1a
2.31819e-245	0.702718	0.162	0.004	5.65176e-241	Pigment	hs3st1l2
4.5256e-245	1.69825	0.55	0.046	1.10334e-240	Pigment	pik3c3
1.80731e-243	0.699666	0.188	0.005	4.40622e-239	Pigment	dixdc1b
1.35422e-242	0.392448	0.105	0.002	3.3016e-238	Pigment	FO704721.3
1.27916e-240	0.706989	0.225	0.008	3.1186e-236	Pigment	dpyda.1
1.59025e-239	0.652922	0.162	0.004	3.87704e-235	Pigment	nsfa
1.83615e-238	1.03716	0.325	0.016	4.47654e-234	Pigment	mocs1
1.65928e-236	1.13323	0.346	0.019	4.04532e-232	Pigment	prom1a
6.1188e-235	2.90401	0.817	0.113	1.49176e-230	Pigment	krt18b
1.5377e-233	0.69263	0.293	0.014	3.7489e-229	Pigment	atp6v0cb
2.51112e-233	1.03683	0.377	0.022	6.12211e-229	Pigment	cd151
3.02843e-229	1.82577	0.555	0.05	7.3833e-225	Pigment	sh3pxd2aa
3.10837e-227	0.755437	0.199	0.006	7.57821e-223	Pigment	gypc
5.07916e-227	0.926174	0.225	0.008	1.2383e-222	Pigment	syngap1b
7.47897e-226	1.22114	0.34	0.019	1.82337e-221	Pigment	stard13a
5.10378e-225	0.63671	0.173	0.005	1.2443e-220	Pigment	aatkb
2.7433e-219	0.950583	0.277	0.013	6.68816e-215	Pigment	rapgef3
4.27252e-218	1.40911	0.503	0.043	1.04164e-213	Pigment	zgc:153184
6.68836e-218	2.41442	0.717	0.093	1.63062e-213	Pigment	jam3b
1.02752e-216	1.14644	0.372	0.023	2.5051e-212	Pigment	palm2akap2.1
9.1922e-216	1.5507	0.555	0.053	2.24106e-211	Pigment	kalrna
5.2327e-215	0.737493	0.209	0.008	1.27573e-210	Pigment	ptprz1b
3.70932e-214	1.13068	0.34	0.02	9.04333e-210	Pigment	pfas
4.15699e-211	0.677779	0.194	0.007	1.01347e-206	Pigment	si:ch211-253b8.5
3.75133e-210	1.26283	0.351	0.022	9.14574e-206	Pigment	dpyda.3
2.03353e-208	1.43791	0.366	0.024	4.95774e-204	Pigment	pald1a
2.77333e-208	1.21959	0.408	0.029	6.76139e-204	Pigment	si:zfos-2326c3.2
3.16191e-208	2.83405	0.827	0.135	7.70873e-204	Pigment	igsf11
7.90129e-206	1.17899	0.435	0.033	1.92633e-201	Pigment	itga4
1.44568e-205	1.21758	0.335	0.02	3.52457e-201	Pigment	inka1b
2.65396e-205	1.36807	0.33	0.02	6.47035e-201	Pigment	myo16
0	6.33994	0.665	0.024	0	Endothelial	aqp8a.1
0	4.4515	0.731	0.007	0	Endothelial	plvapb
0	3.98041	0.747	0.004	0	Endothelial	cdh6
0	3.33781	0.747	0.01	0	Endothelial	mcamb
0	3.22112	0.648	0.004	0	Endothelial	CABZ01030107.1
0	3.15559	0.703	0.005	0	Endothelial	ebf3a.1
0	3.07029	0.725	0.009	0	Endothelial	esama
0	2.93865	0.731	0.011	0	Endothelial	dysf
0	2.93017	0.687	0.01	0	Endothelial	col4a1
0	2.87625	0.687	0.004	0	Endothelial	tie1
0	2.80135	0.687	0.001	0	Endothelial	fgd5a
0	2.62913	0.648	0.003	0	Endothelial	cldn5b
0	2.58924	0.709	0.002	0	Endothelial	kdrl
0	2.54654	0.621	0.004	0	Endothelial	flt4
0	2.53211	0.687	0.015	0	Endothelial	podxl
0	2.49481	0.429	0.002	0	Endothelial	sele
0	2.48776	0.659	0.014	0	Endothelial	col4a2
0	2.46931	0.681	0.003	0	Endothelial	tmem108
0	2.46244	0.577	0.021	0	Endothelial	slco2a1
0	2.3248	0.516	0.01	0	Endothelial	rca2.2
0	2.2925	0.643	0.035	0	Endothelial	ldb2a
0	2.28457	0.643	0.005	0	Endothelial	si:ch211-145b13.6
0	2.26418	0.604	0.039	0	Endothelial	clic2
0	2.22938	0.692	0.012	0	Endothelial	fli1a
0	2.19227	0.637	0.042	0	Endothelial	cx43
0	2.1639	0.637	0.015	0	Endothelial	prex2
0	2.08919	0.665	0.032	0	Endothelial	asap1b
0	2.08588	0.687	0.055	0	Endothelial	kank3
0	2.05868	0.654	0.005	0	Endothelial	egfl7
0	2.04708	0.709	0.049	0	Endothelial	plekhg5a
0	2.04673	0.615	0.001	0	Endothelial	micall2a
0	2.00726	0.582	0.011	0	Endothelial	pcdh17
0	1.89125	0.566	0.023	0	Endothelial	si:dkey-261h17.1
0	1.88449	0.621	0.018	0	Endothelial	si:ch211-156j16.1
0	1.84112	0.643	0.038	0	Endothelial	pknox2
0	1.84081	0.577	0.018	0	Endothelial	mef2cb
0	1.81668	0.61	0.002	0	Endothelial	kdr
0	1.81539	0.566	0.001	0	Endothelial	clec14a
0	1.78481	0.577	0.001	0	Endothelial	ecscr
0	1.78328	0.588	0.001	0	Endothelial	adgrl4
0	1.78224	0.467	0.005	0	Endothelial	ntsr1
0	1.73742	0.17	0.002	0	Endothelial	lyve1a
0	1.71265	0.593	0.004	0	Endothelial	arhgef9b
0	1.69869	0.511	0.016	0	Endothelial	arid3c
0	1.69116	0.61	0.036	0	Endothelial	arhgap31
0	1.68594	0.505	0.004	0	Endothelial	pdgfbb
0	1.66854	0.495	0.024	0	Endothelial	dll4
0	1.65591	0.429	0.016	0	Endothelial	stab2
0	1.629	0.484	0.002	0	Endothelial	nr5a2
0	1.59495	0.637	0.036	0	Endothelial	yrk
0	1.59309	0.632	0.044	0	Endothelial	lrrc8db
0	1.57447	0.571	0.004	0	Endothelial	rasip1
0	1.56758	0.588	0.001	0	Endothelial	pecam1
0	1.55775	0.555	0.009	0	Endothelial	etv2
0	1.54299	0.538	0.001	0	Endothelial	shank3b
0	1.54078	0.473	0.025	0	Endothelial	dchs1b
0	1.5112	0.473	0.01	0	Endothelial	itga1
0	1.47389	0.39	0.001	0	Endothelial	angpt2a
0	1.44901	0.56	0.033	0	Endothelial	tspan4b
0	1.44561	0.39	0.005	0	Endothelial	kirrel3l
0	1.44478	0.484	0.015	0	Endothelial	nova2
0	1.41119	0.451	0.02	0	Endothelial	prkcz
0	1.3972	0.418	0.005	0	Endothelial	iqsec2a
0	1.39355	0.544	0.009	0	Endothelial	robo4
0	1.38081	0.467	0.001	0	Endothelial	myct1a
0	1.37302	0.478	0.007	0	Endothelial	stab1
0	1.37248	0.319	0.001	0	Endothelial	BX936342.1
0	1.35686	0.324	0.003	0	Endothelial	CR751227.2
0	1.35477	0.516	0.015	0	Endothelial	shroom4
0	1.32363	0.44	0.001	0	Endothelial	gig2j
0	1.31347	0.478	0.018	0	Endothelial	adam12
0	1.2658	0.467	0.008	0	Endothelial	calcrlb
0	1.26429	0.489	0.017	0	Endothelial	adcy2b
0	1.25806	0.467	0.02	0	Endothelial	frem1b
0	1.24277	0.44	0.02	0	Endothelial	ebf3a
0	1.23723	0.462	0.002	0	Endothelial	fli1b
0	1.22672	0.396	0.01	0	Endothelial	rgs3b
0	1.21326	0.511	0.019	0	Endothelial	tpte
0	1.20404	0.401	0.007	0	Endothelial	gpm6aa
0	1.20178	0.396	0.001	0	Endothelial	tm4sf18
0	1.18701	0.352	0.001	0	Endothelial	col18a1b
0	1.18295	0.456	0.016	0	Endothelial	neurl1b
0	1.1742	0.434	0.013	0	Endothelial	CABZ01026153.1
0	1.16286	0.44	0.006	0	Endothelial	ptprb
0	1.15191	0.44	0.011	0	Endothelial	ildr2
0	1.14189	0.451	0.003	0	Endothelial	scarf1
0	1.13986	0.467	0.013	0	Endothelial	afap1l1b
0	1.12962	0.423	0.018	0	Endothelial	si:ch211-248e11.2
0	1.12799	0.44	0.009	0	Endothelial	mpp2b
0	1.1052	0.385	0.002	0	Endothelial	bcl6b
0	1.09028	0.484	0.021	0	Endothelial	lrrc8c
0	1.09009	0.385	0.013	0	Endothelial	rapgef3
0	1.08397	0.302	0.009	0	Endothelial	edn2
0	1.0745	0.445	0.022	0	Endothelial	prex1
0	1.02769	0.385	0.008	0	Endothelial	rnf144ab
0	1.0276	0.423	0.01	0	Endothelial	wasf3b
0	1.02169	0.456	0.008	0	Endothelial	CU927890.1
0	1.01824	0.396	0.002	0	Endothelial	exoc3l2b
0	1.01019	0.407	0.014	0	Endothelial	arap3
0	1.00319	0.313	0.002	0	Endothelial	tnfaip2b
0	0.988496	0.165	0	0	Endothelial	esm1
0	0.983475	0.396	0.009	0	Endothelial	tmem47
0	0.968944	0.352	0.008	0	Endothelial	ppp1r13ba
0	0.960243	0.33	0.001	0	Endothelial	CT033796.2
0	0.95798	0.352	0.014	0	Endothelial	adamts9
0	0.954331	0.396	0.005	0	Endothelial	notchl
0	0.94489	0.352	0.007	0	Endothelial	vwf
0	0.934754	0.401	0.012	0	Endothelial	efnb2b
0	0.931222	0.429	0.016	0	Endothelial	anxa13
0	0.925121	0.445	0.015	0	Endothelial	myo6b
0	0.89639	0.396	0.004	0	Endothelial	anks1ab
0	0.883294	0.385	0.012	0	Endothelial	s1pr1
0	0.87621	0.313	0.001	0	Endothelial	lmo2
0	0.864478	0.335	0.001	0	Endothelial	si:dkey-126g1.9
0	0.86373	0.39	0.014	0	Endothelial	gng2
0	0.860682	0.352	0.007	0	Endothelial	hpn
0	0.853647	0.324	0.004	0	Endothelial	b3gnt3.4
0	0.851564	0.346	0.011	0	Endothelial	si:ch211-14k19.8
0	0.849673	0.319	0.006	0	Endothelial	rnd1b
0	0.814558	0.346	0.001	0	Endothelial	si:dkey-237i9.8
0	0.800205	0.335	0.005	0	Endothelial	mmrn2a
0	0.794366	0.275	0.006	0	Endothelial	hspa12b
0	0.767129	0.379	0.001	0	Endothelial	she
0	0.7637	0.385	0.016	0	Endothelial	parvab
0	0.758	0.247	0.002	0	Endothelial	mrc1a
0	0.754996	0.264	0.001	0	Endothelial	zgc:153311
0	0.744327	0.341	0.01	0	Endothelial	reep1
0	0.739727	0.335	0.006	0	Endothelial	si:ch211-130m23.3
0	0.738506	0.231	0.005	0	Endothelial	slc41a1
0	0.728589	0.396	0.005	0	Endothelial	tgfb1b
0	0.721045	0.269	0.008	0	Endothelial	kank4
0	0.716935	0.313	0.009	0	Endothelial	grapa
0	0.703406	0.264	0	0	Endothelial	lbx2
0	0.69519	0.319	0	0	Endothelial	tmem88a
0	0.676083	0.275	0.004	0	Endothelial	si:ch211-66e2.3
0	0.669109	0.313	0.009	0	Endothelial	itgb2
0	0.665538	0.275	0.006	0	Endothelial	arhgap20b
0	0.659851	0.297	0.002	0	Endothelial	si:ch211-106h4.9
0	0.615205	0.33	0.005	0	Endothelial	fam174b
0	0.606186	0.264	0.006	0	Endothelial	celsr1b
0	0.603509	0.275	0.006	0	Endothelial	gypc
0	0.580112	0.143	0.002	0	Endothelial	sorbs2b
0	0.575069	0.225	0.005	0	Endothelial	kcnq2a
0	0.571205	0.258	0	0	Endothelial	meox1
0	0.565427	0.231	0.002	0	Endothelial	rbpms2b
0	0.555454	0.231	0.001	0	Endothelial	aplnrb
0	0.540892	0.231	0.001	0	Endothelial	ccm2l
0	0.533078	0.214	0	0	Endothelial	exoc3l2a
0	0.528706	0.253	0	0	Endothelial	myct1b
0	0.514816	0.253	0.007	0	Endothelial	slc4a2a
0	0.500521	0.247	0.005	0	Endothelial	fkbp1ab
0	0.497113	0.181	0.001	0	Endothelial	igfbp7
0	0.492143	0.247	0.002	0	Endothelial	itga6a
0	0.474213	0.236	0.001	0	Endothelial	gask1b
0	0.473142	0.225	0.002	0	Endothelial	gpr182
0	0.455589	0.11	0	0	Endothelial	cdh5
0	0.436186	0.209	0.004	0	Endothelial	cxcl20
0	0.426182	0.187	0.001	0	Endothelial	hoxb3a
0	0.416591	0.231	0.003	0	Endothelial	exoc3l1
0	0.385923	0.214	0.004	0	Endothelial	hif1aa
0	0.378948	0.187	0.003	0	Endothelial	abcc2
0	0.377435	0.187	0	0	Endothelial	tspan11
0	0.360589	0.154	0	0	Endothelial	ccn1l2
0	0.359749	0.17	0.001	0	Endothelial	CABZ01075125.1
0	0.352698	0.132	0.001	0	Endothelial	plvapa
0	0.345982	0.137	0.001	0	Endothelial	tek
0	0.342221	0.187	0.003	0	Endothelial	CR384089.1
0	0.34095	0.187	0.003	0	Endothelial	ushbp1
0	0.332728	0.143	0.002	0	Endothelial	ptn
0	0.330718	0.137	0	0	Endothelial	sox18
0	0.30054	0.165	0.001	0	Endothelial	si:ch211-33e4.2
0	0.293332	0.165	0	0	Endothelial	hoxd3a
0	0.29169	0.126	0.001	0	Endothelial	gata2a
0	0.269607	0.126	0.002	0	Endothelial	tulp4b
0	0.264997	0.17	0	0	Endothelial	CU463231.2
0	0.260499	0.115	0.001	0	Endothelial	hoxd11a
0	0.251215	0.121	0	0	Endothelial	hoxd12a
3.38954e-307	1.47851	0.571	0.038	8.2637e-303	Endothelial	fmnl3
3.95776e-298	1.26063	0.467	0.026	9.64903e-294	Endothelial	pear1
2.19565e-295	0.806963	0.357	0.015	5.35299e-291	Endothelial	abhd15a
8.97323e-293	0.920561	0.297	0.011	2.18767e-288	Endothelial	znf804a
2.23617e-291	0.325667	0.192	0.004	5.45178e-287	Endothelial	si:ch211-241f5.3
1.53901e-286	0.634222	0.33	0.013	3.7521e-282	Endothelial	dnase1l4.2
1.19888e-283	0.48706	0.154	0.003	2.92288e-279	Endothelial	vegfc
1.03435e-282	0.262284	0.137	0.002	2.52173e-278	Endothelial	gtpbp3
7.08447e-279	0.648056	0.313	0.012	1.72719e-274	Endothelial	tmem204
1.12721e-278	1.16633	0.445	0.025	2.74814e-274	Endothelial	xylt1
2.74172e-277	0.380352	0.148	0.003	6.68432e-273	Endothelial	sema6d
3.16026e-272	1.09039	0.451	0.026	7.70471e-268	Endothelial	rbpms2a
6.50415e-271	1.60477	0.56	0.041	1.58571e-266	Endothelial	tbx1
4.15697e-270	0.600272	0.236	0.007	1.01347e-265	Endothelial	rem1
1.23918e-260	0.873417	0.313	0.013	3.02113e-256	Endothelial	aplnra
2.94025e-257	0.842721	0.418	0.024	7.16833e-253	Endothelial	sorbs1
1.07605e-254	0.499655	0.225	0.007	2.62342e-250	Endothelial	hyal2a
9.89096e-254	0.458246	0.269	0.01	2.41141e-249	Endothelial	ugt1b5
1.72795e-253	0.989345	0.462	0.029	4.21275e-249	Endothelial	si:zfos-2326c3.2
1.24651e-251	2.20474	0.654	0.062	3.03898e-247	Endothelial	srgn
1.41039e-250	0.310165	0.176	0.004	3.43854e-246	Endothelial	ppfibp1a
1.32344e-249	1.59664	0.516	0.038	3.22654e-245	Endothelial	nfatc2a
1.72183e-245	1.52151	0.555	0.044	4.19782e-241	Endothelial	tns2a
0	5.7778	0.665	0.019	0	Metaphocyte	grn2
0	3.57289	0.693	0.017	0	Metaphocyte	CR396595.3
0	3.40948	0.642	0.002	0	Metaphocyte	si:ch73-359m17.9
0	3.13209	0.642	0.038	0	Metaphocyte	cldnh
0	3.03868	0.646	0.025	0	Metaphocyte	si:dkeyp-23e4.3
0	3.02655	0.74	0.019	0	Metaphocyte	ptprja
0	2.99159	0.654	0.006	0	Metaphocyte	si:ch211-198m17.1
0	2.82737	0.685	0.003	0	Metaphocyte	chia.6
0	2.8089	0.543	0.031	0	Metaphocyte	BRSK2
0	2.6485	0.681	0.053	0	Metaphocyte	CR936442.1
0	2.62023	0.575	0.001	0	Metaphocyte	si:ch73-343g19.4
0	2.60438	0.602	0.009	0	Metaphocyte	il12bb
0	2.49378	0.689	0.052	0	Metaphocyte	tp53bp2b
0	2.44435	0.661	0.071	0	Metaphocyte	si:dkey-28k24.2.2
0	2.39675	0.661	0.014	0	Metaphocyte	spi1a
0	2.39351	0.591	0.009	0	Metaphocyte	ncf1
0	2.37211	0.591	0.019	0	Metaphocyte	ccr9a
0	2.34006	0.555	0.003	0	Metaphocyte	si:ch73-359m17.7
0	2.19813	0.65	0.013	0	Metaphocyte	mctp2b
0	2.0823	0.567	0.028	0	Metaphocyte	cyb561a3a
0	2.04586	0.575	0.019	0	Metaphocyte	prkcz
0	2.02511	0.594	0.023	0	Metaphocyte	rgs13
0	2.00262	0.508	0.006	0	Metaphocyte	CR354549.3
0	1.96082	0.606	0.013	0	Metaphocyte	lcp2a
0	1.95412	0.587	0.006	0	Metaphocyte	CU914776.2
0	1.9262	0.63	0.054	0	Metaphocyte	prkcbb
0	1.90175	0.543	0.01	0	Metaphocyte	SIPA1
0	1.89733	0.594	0.039	0	Metaphocyte	nipal4
0	1.86619	0.425	0.007	0	Metaphocyte	ccl20a.3
0	1.84675	0.602	0.024	0	Metaphocyte	mpeg1.1
0	1.82744	0.543	0.016	0	Metaphocyte	si:dkey-33c9.6
0	1.81222	0.559	0.022	0	Metaphocyte	laptm5
0	1.80121	0.307	0.009	0	Metaphocyte	ccl35.1
0	1.78862	0.472	0.01	0	Metaphocyte	efr3ba
0	1.77101	0.469	0.009	0	Metaphocyte	dok2
0	1.73844	0.504	0.009	0	Metaphocyte	itgb2
0	1.73534	0.524	0.017	0	Metaphocyte	unm-sa1614
0	1.72412	0.543	0.017	0	Metaphocyte	prkg1a
0	1.72053	0.445	0.001	0	Metaphocyte	itgam
0	1.69541	0.551	0.036	0	Metaphocyte	yrk
0	1.69524	0.508	0.036	0	Metaphocyte	svila
0	1.65715	0.528	0.03	0	Metaphocyte	pou2f3
0	1.65326	0.531	0.005	0	Metaphocyte	crfb15
0	1.65187	0.543	0.032	0	Metaphocyte	vsir
0	1.63479	0.531	0.003	0	Metaphocyte	wasa
0	1.62749	0.52	0.021	0	Metaphocyte	lyn
0	1.59124	0.539	0.033	0	Metaphocyte	CABZ01064472.1
0	1.57432	0.484	0.014	0	Metaphocyte	si:dkey-262k9.4
0	1.57243	0.528	0.009	0	Metaphocyte	pik3ap1
0	1.54545	0.295	0.001	0	Metaphocyte	il22ra2
0	1.54352	0.508	0.005	0	Metaphocyte	si:dkey-27j5.10.1
0	1.53032	0.516	0.033	0	Metaphocyte	mctp1a
0	1.52692	0.469	0.006	0	Metaphocyte	spns3
0	1.49536	0.433	0.009	0	Metaphocyte	pik3r5
0	1.48502	0.437	0.001	0	Metaphocyte	CABZ01087025.3
0	1.47108	0.528	0.019	0	Metaphocyte	skap2
0	1.46638	0.449	0.006	0	Metaphocyte	evi5a
0	1.46589	0.508	0.017	0	Metaphocyte	zgc:64051
0	1.43877	0.504	0.022	0	Metaphocyte	hck
0	1.43384	0.476	0.003	0	Metaphocyte	cdh28
0	1.40134	0.496	0.024	0	Metaphocyte	fybb
0	1.39604	0.472	0.022	0	Metaphocyte	plekho2
0	1.33882	0.339	0.007	0	Metaphocyte	ENSDARG00000043475
0	1.28418	0.374	0.002	0	Metaphocyte	si:dkey-83f18.10
0	1.2761	0.311	0.005	0	Metaphocyte	kansl1l
0	1.27114	0.386	0.003	0	Metaphocyte	si:ch211-156b7.5
0	1.27059	0.35	0.016	0	Metaphocyte	si:ch73-359m17.5
0	1.24334	0.488	0.033	0	Metaphocyte	ccdc88b
0	1.23454	0.409	0.007	0	Metaphocyte	si:dkey-83f18.4
0	1.23189	0.429	0.028	0	Metaphocyte	dock9b
0	1.22854	0.433	0.027	0	Metaphocyte	kif21b
0	1.21744	0.429	0.01	0	Metaphocyte	fermt3b
0	1.21635	0.425	0.003	0	Metaphocyte	BX248410.4
0	1.20539	0.421	0.007	0	Metaphocyte	elovl5
0	1.19668	0.429	0.013	0	Metaphocyte	si:ch211-153b23.7
0	1.18716	0.437	0.018	0	Metaphocyte	arhgap4a
0	1.1726	0.358	0.013	0	Metaphocyte	inpp5d
0	1.16042	0.386	0.021	0	Metaphocyte	afap1l2
0	1.15848	0.382	0.011	0	Metaphocyte	lcp1
0	1.14274	0.295	0.007	0	Metaphocyte	FO681314.1
0	1.13009	0.331	0.003	0	Metaphocyte	ptprjb.1
0	1.09562	0.35	0.001	0	Metaphocyte	pigrl4.2
0	1.09308	0.378	0.02	0	Metaphocyte	inka1b
0	1.08268	0.358	0.015	0	Metaphocyte	BX004816.1
0	1.07208	0.315	0.004	0	Metaphocyte	klhl6
0	1.06561	0.319	0.015	0	Metaphocyte	tnfb
0	1.03099	0.413	0.015	0	Metaphocyte	coro1a
0	1.00168	0.354	0.001	0	Metaphocyte	si:dkeyp-82a1.4
0	0.98406	0.35	0.011	0	Metaphocyte	prox1a
0	0.956347	0.256	0.001	0	Metaphocyte	xcr1a.1
0	0.94503	0.307	0.008	0	Metaphocyte	pip5k1ba
0	0.923444	0.315	0.004	0	Metaphocyte	LO018605.2
0	0.919806	0.236	0.006	0	Metaphocyte	sash3
0	0.878077	0.268	0.001	0	Metaphocyte	CR396595.4
0	0.865072	0.295	0.001	0	Metaphocyte	CR354549.9
0	0.862298	0.299	0.002	0	Metaphocyte	il1fma
0	0.849656	0.244	0.005	0	Metaphocyte	ftr66
0	0.843698	0.307	0.009	0	Metaphocyte	si:ch73-248e21.5
0	0.823986	0.256	0.006	0	Metaphocyte	parvg
0	0.813684	0.287	0.009	0	Metaphocyte	mfng
0	0.792913	0.244	0.005	0	Metaphocyte	ptpn18
0	0.774446	0.26	0.006	0	Metaphocyte	pstpip1a
0	0.759009	0.276	0.005	0	Metaphocyte	pstpip1b
0	0.751949	0.276	0.009	0	Metaphocyte	fmnl1a
0	0.743769	0.181	0	0	Metaphocyte	si:dkey-1c7.2
0	0.739803	0.252	0.009	0	Metaphocyte	zgc:158868
0	0.735679	0.205	0.001	0	Metaphocyte	nme2b.2
0	0.722923	0.228	0.005	0	Metaphocyte	cdh30
0	0.720646	0.256	0.002	0	Metaphocyte	CABZ01109481.1
0	0.703374	0.244	0.001	0	Metaphocyte	CR354549.6
0	0.697075	0.256	0.001	0	Metaphocyte	opn1sw2
0	0.694478	0.24	0.001	0	Metaphocyte	lrmp
0	0.694206	0.244	0.002	0	Metaphocyte	si:ch73-264p11.1
0	0.684327	0.169	0.004	0	Metaphocyte	BX120005.2
0	0.682727	0.26	0.002	0	Metaphocyte	grtp1b
0	0.667011	0.217	0.002	0	Metaphocyte	gucy2c
0	0.666446	0.228	0.004	0	Metaphocyte	plek
0	0.653096	0.181	0.001	0	Metaphocyte	slc35g2a
0	0.638581	0.22	0.005	0	Metaphocyte	si:ch211-114l13.12
0	0.634534	0.209	0.002	0	Metaphocyte	vaspa
0	0.626143	0.276	0.002	0	Metaphocyte	cd180
0	0.589095	0.213	0.001	0	Metaphocyte	CR354549.7
0	0.57851	0.173	0.001	0	Metaphocyte	tlr1
0	0.563433	0.244	0.008	0	Metaphocyte	si:dkey-83k24.5
0	0.558529	0.154	0.001	0	Metaphocyte	CT583723.2
0	0.555351	0.169	0.001	0	Metaphocyte	zgc:56622
0	0.55314	0.169	0	0	Metaphocyte	pik3r6b
0	0.551995	0.185	0.001	0	Metaphocyte	si:busm1-228j01.6
0	0.5489	0.189	0.004	0	Metaphocyte	gpr183a
0	0.548649	0.205	0.004	0	Metaphocyte	vwa10.1
0	0.544057	0.169	0.003	0	Metaphocyte	sla1a
0	0.542164	0.205	0.003	0	Metaphocyte	si:rp71-68n21.9
0	0.540084	0.193	0.004	0	Metaphocyte	card9
0	0.493776	0.169	0.004	0	Metaphocyte	plekho1a
0	0.47983	0.161	0.004	0	Metaphocyte	F2RL3
0	0.459909	0.165	0.003	0	Metaphocyte	ppp1r18
0	0.456573	0.185	0.001	0	Metaphocyte	CR354549.12
0	0.450702	0.165	0	0	Metaphocyte	spic
0	0.448479	0.165	0	0	Metaphocyte	si:ch211-71m22.3
0	0.447066	0.138	0	0	Metaphocyte	tlr4bb
0	0.445743	0.146	0	0	Metaphocyte	CR354549.8
0	0.409595	0.146	0.002	0	Metaphocyte	p2ry10
0	0.396544	0.142	0.001	0	Metaphocyte	si:dkey-82k12.13
0	0.390336	0.138	0.001	0	Metaphocyte	CR354549.11
0	0.38367	0.134	0.002	0	Metaphocyte	lpar5a
0	0.355979	0.13	0.001	0	Metaphocyte	adap2
0	0.347499	0.118	0.001	0	Metaphocyte	ly86
0	0.345588	0.13	0.001	0	Metaphocyte	si:dkey-183p4.10
0	0.342839	0.114	0	0	Metaphocyte	si:ch211-11c3.12
0	0.306663	0.106	0	0	Metaphocyte	tlr4al
0	0.29308	0.114	0.002	0	Metaphocyte	AL590149.1
2.27707e-298	0.756166	0.24	0.009	5.55149e-294	Metaphocyte	nol4la
3.8077e-293	0.508889	0.197	0.006	9.28317e-289	Metaphocyte	stard10
4.20535e-293	0.493397	0.15	0.004	1.02526e-288	Metaphocyte	arhgef15
2.1601e-283	0.723863	0.28	0.013	5.26634e-279	Metaphocyte	ptk2ba
2.1183e-281	1.21394	0.472	0.038	5.16441e-277	Metaphocyte	plcg2
3.68048e-281	0.858396	0.264	0.012	8.973e-277	Metaphocyte	stoml3b
8.96946e-280	0.600266	0.201	0.007	2.18675e-275	Metaphocyte	myh11a
1.58638e-279	0.589594	0.177	0.005	3.8676e-275	Metaphocyte	alox5a
4.5144e-278	0.90779	0.331	0.019	1.10061e-273	Metaphocyte	ptpn6
8.70169e-278	0.271921	0.11	0.002	2.12147e-273	Metaphocyte	tnfaip8l2a
1.85326e-273	0.755969	0.264	0.012	4.51824e-269	Metaphocyte	si:ch73-211l2.3
9.28779e-271	0.493535	0.205	0.007	2.26436e-266	Metaphocyte	cybb
9.8402e-271	1.40802	0.512	0.046	2.39904e-266	Metaphocyte	arhgap45a
1.68339e-266	1.66467	0.492	0.044	4.1041e-262	Metaphocyte	akt3a
5.48999e-265	1.64486	0.543	0.054	1.33846e-260	Metaphocyte	prom2
7.02969e-264	0.453293	0.118	0.002	1.71384e-259	Metaphocyte	BX323062.1
1.02311e-260	0.932796	0.374	0.026	2.49434e-256	Metaphocyte	wipf1b
4.75719e-258	1.1067	0.331	0.02	1.1598e-253	Metaphocyte	fam102aa
1.19494e-255	0.58128	0.189	0.007	2.91326e-251	Metaphocyte	GNAZ
2.96178e-246	0.610682	0.272	0.014	7.22082e-242	Metaphocyte	il16
4.47005e-244	0.444766	0.15	0.004	1.0898e-239	Metaphocyte	si:dkey-33b17.3
1.29342e-240	1.85553	0.622	0.078	3.15337e-236	Metaphocyte	camk1b
1.7464e-236	0.631833	0.283	0.016	4.25773e-232	Metaphocyte	parm1
1.56038e-227	0.803449	0.272	0.016	3.80421e-223	Metaphocyte	unc5db
5.83015e-227	0.301498	0.114	0.003	1.42139e-222	Metaphocyte	cmtm8a
5.94967e-223	0.549204	0.252	0.014	1.45053e-218	Metaphocyte	gng2
7.86513e-222	0.398373	0.146	0.005	1.91752e-217	Metaphocyte	tmprss2
3.95648e-220	3.08249	0.768	0.146	9.6459e-216	Metaphocyte	pag1
7.06609e-220	0.603167	0.244	0.013	1.72271e-215	Metaphocyte	kctd12.2
4.19926e-219	2.23419	0.65	0.093	1.02378e-214	Metaphocyte	elmo1
4.32899e-219	1.78083	0.677	0.098	1.05541e-214	Metaphocyte	celf2
3.60995e-218	0.990724	0.37	0.029	8.80106e-214	Metaphocyte	cbln4
5.48724e-218	1.1908	0.437	0.041	1.33779e-213	Metaphocyte	mcf2la
1.56442e-217	0.539714	0.201	0.009	3.81406e-213	Metaphocyte	arhgef7a
6.86122e-216	1.16184	0.421	0.038	1.67277e-211	Metaphocyte	pknox2
1.50021e-210	1.67123	0.535	0.064	3.65751e-206	Metaphocyte	tiam1b
2.59742e-210	0.784809	0.252	0.014	6.33252e-206	Metaphocyte	dok1b
1.81031e-209	0.882711	0.327	0.024	4.41353e-205	Metaphocyte	smap2
7.82145e-208	0.297036	0.102	0.002	1.90687e-203	Metaphocyte	cnr2
1.63976e-207	0.308712	0.134	0.004	3.99775e-203	Metaphocyte	arid5a
6.62633e-206	1.39525	0.413	0.039	1.6155e-201	Metaphocyte	ptpn22
1.60832e-200	0.76924	0.236	0.013	3.92109e-196	Metaphocyte	btk
1.75651e-199	0.597585	0.224	0.012	4.28237e-195	Metaphocyte	kcnk1b
5.23961e-192	0.760853	0.295	0.021	1.27742e-187	Metaphocyte	hepacam2
2.34851e-189	0.575868	0.193	0.009	5.72567e-185	Metaphocyte	plxnc1
3.99333e-188	0.500822	0.189	0.009	9.73573e-184	Metaphocyte	syk
1.09873e-186	0.383275	0.114	0.003	2.67871e-182	Metaphocyte	tlr8b
5.57722e-185	1.63537	0.606	0.091	1.35973e-180	Metaphocyte	si:ch73-158p21.3
4.41796e-184	0.956256	0.366	0.034	1.0771e-179	Metaphocyte	dock10
0	5.34712	0.941	0.019	0	Unknown-1	aldh1a3
0	4.42376	0.951	0.032	0	Unknown-1	cldnh
0	4.11804	0.893	0.019	0	Unknown-1	alk
0	3.88809	0.793	0.003	0	Unknown-1	stra6
0	3.53142	0.888	0.013	0	Unknown-1	ptprja
0	3.34471	0.824	0.004	0	Unknown-1	si:ch211-152c2.3
0	3.23892	0.708	0.009	0	Unknown-1	cyp27c1
0	3.1883	0.82	0.133	0	Unknown-1	prcp
0	3.17209	0.602	0.043	0	Unknown-1	eda
0	3.07265	0.87	0.145	0	Unknown-1	foxp1b
0	2.9752	0.621	0.015	0	Unknown-1	CABZ01027646.1
0	2.87566	0.739	0.032	0	Unknown-1	adgrg6
0	2.81135	0.678	0.028	0	Unknown-1	mctp1a
0	2.80082	0.654	0.015	0	Unknown-1	pip5k1bb
0	2.78097	0.75	0.099	0	Unknown-1	dab2ipb
0	2.77232	0.715	0.026	0	Unknown-1	adgrl3.1
0	2.72528	0.701	0.008	0	Unknown-1	btk
0	2.6636	0.709	0.015	0	Unknown-1	si:ch211-147k10.5
0	2.65021	0.815	0.178	0	Unknown-1	gab2
0	2.64732	0.588	0.012	0	Unknown-1	si:ch73-359m17.5
0	2.61598	0.443	0.005	0	Unknown-1	edn2
0	2.60948	0.737	0.025	0	Unknown-1	pou2f3
0	2.5996	0.674	0.024	0	Unknown-1	ppfia2
0	2.49478	0.705	0.057	0	Unknown-1	zgc:92380
0	2.47182	0.645	0.018	0	Unknown-1	tmc5
0	2.42831	0.564	0.005	0	Unknown-1	vil1
0	2.39986	0.372	0.026	0	Unknown-1	stc1
0	2.30977	0.671	0.069	0	Unknown-1	eml2
0	2.28671	0.702	0.095	0	Unknown-1	shroom3
0	2.24625	0.294	0.006	0	Unknown-1	rdh10a
0	2.19531	0.668	0.034	0	Unknown-1	plcg2
0	2.12012	0.527	0.002	0	Unknown-1	gata1b
0	2.09376	0.687	0.162	0	Unknown-1	lgr4
0	2.06461	0.626	0.055	0	Unknown-1	ehf
0	2.04947	0.534	0.041	0	Unknown-1	tpd52l1
0	2.04598	0.438	0.013	0	Unknown-1	si:ch211-225k7.3
0	2.03394	0.402	0.035	0	Unknown-1	rdh10b
0	2.02864	0.669	0.136	0	Unknown-1	ralbp1
0	2.00013	0.61	0.109	0	Unknown-1	mical2b
0	1.99194	0.546	0.004	0	Unknown-1	si:ch211-112g6.4
0	1.98818	0.551	0.007	0	Unknown-1	si:dkeyp-117b11.1
0	1.9793	0.576	0.019	0	Unknown-1	hck
0	1.97895	0.624	0.113	0	Unknown-1	gnal
0	1.93318	0.578	0.02	0	Unknown-1	fybb
0	1.91759	0.204	0.002	0	Unknown-1	cuzd1.1
0	1.84071	0.446	0.006	0	Unknown-1	unc13d
0	1.82539	0.438	0.005	0	Unknown-1	gng13a
0	1.79589	0.565	0.097	0	Unknown-1	vav2
0	1.78656	0.505	0.035	0	Unknown-1	nfatc2a
0	1.78523	0.398	0.007	0	Unknown-1	rasgrf2b
0	1.77122	0.601	0.136	0	Unknown-1	pbxip1b
0	1.76968	0.476	0.005	0	Unknown-1	mrvi1
0	1.7537	0.444	0.008	0	Unknown-1	zgc:194930
0	1.74231	0.477	0.006	0	Unknown-1	mcf2lb
0	1.68421	0.527	0.092	0	Unknown-1	pde3b
0	1.684	0.51	0.05	0	Unknown-1	tp53bp2b
0	1.6746	0.374	0.003	0	Unknown-1	si:dkey-61f9.1.1
0	1.66682	0.388	0.039	0	Unknown-1	nr3c2
0	1.65046	0.753	0.193	0	Unknown-1	si:ch211-1a19.3
0	1.64505	0.422	0.017	0	Unknown-1	tuba1a
0	1.62426	0.455	0.019	0	Unknown-1	lyn
0	1.61253	0.35	0.016	0	Unknown-1	TENM2.1
0	1.61135	0.461	0.021	0	Unknown-1	rgs13
0	1.60857	0.41	0.012	0	Unknown-1	igsf9a
0	1.59436	0.578	0.117	0	Unknown-1	kif5ba.1
0	1.58861	0.449	0.021	0	Unknown-1	kcnh6a
0	1.56956	0.35	0.002	0	Unknown-1	si:ch211-213d14.1
0	1.52675	0.429	0.01	0	Unknown-1	gramd4a
0	1.52437	0.472	0.075	0	Unknown-1	BX284638.2
0	1.51855	0.407	0.004	0	Unknown-1	prr15la
0	1.50607	0.376	0.003	0	Unknown-1	FO905027.1
0	1.48973	0.373	0.009	0	Unknown-1	prox1a
0	1.48621	0.514	0.074	0	Unknown-1	ikbke
0	1.47335	0.273	0.02	0	Unknown-1	b4galnt4a
0	1.47013	0.421	0.012	0	Unknown-1	itpr1a
0	1.45673	0.263	0	0	Unknown-1	ostn
0	1.45406	0.428	0.056	0	Unknown-1	desi2
0	1.44728	0.248	0.006	0	Unknown-1	fsta
0	1.43504	0.461	0.077	0	Unknown-1	spsb4a
0	1.40052	0.372	0.027	0	Unknown-1	slc4a11
0	1.36492	0.303	0.002	0	Unknown-1	artnb
0	1.36138	0.351	0.002	0	Unknown-1	skap1
0	1.33339	0.263	0.004	0	Unknown-1	syt6a
0	1.32686	0.324	0.012	0	Unknown-1	lad1
0	1.31949	0.305	0.02	0	Unknown-1	zgc:103755
0	1.28824	0.346	0.014	0	Unknown-1	rbp5
0	1.26718	0.406	0.057	0	Unknown-1	cldn17
0	1.26316	0.413	0.062	0	Unknown-1	rab11fip3
0	1.24714	0.317	0.005	0	Unknown-1	FO681314.1
0	1.23277	0.306	0.021	0	Unknown-1	clmn
0	1.22365	0.355	0.019	0	Unknown-1	hepacam2
0	1.22058	0.288	0.013	0	Unknown-1	sorbs2a
0	1.21695	0.288	0.017	0	Unknown-1	cyth3a
0	1.20793	0.237	0.006	0	Unknown-1	znf385c
0	1.20498	0.274	0.019	0	Unknown-1	ak5
0	1.17592	0.306	0.014	0	Unknown-1	BX004780.1
0	1.17577	0.266	0.016	0	Unknown-1	myh11b
0	1.13787	0.321	0.004	0	Unknown-1	pstpip1a
0	1.10976	0.276	0.014	0	Unknown-1	myo6b
0	1.1043	0.289	0.004	0	Unknown-1	vill
0	1.04731	0.263	0.001	0	Unknown-1	si:dkeyp-82a1.8
0	1.03057	0.263	0.004	0	Unknown-1	ftr66
0	1.01281	0.21	0.003	0	Unknown-1	si:ch73-364h19.1
0	1.00432	0.236	0.017	0	Unknown-1	lrch2
0	0.965289	0.239	0.003	0	Unknown-1	vwa10.1
0	0.961746	0.235	0.014	0	Unknown-1	adgrf3a
0	0.955817	0.284	0.024	0	Unknown-1	depdc7a
0	0.951299	0.276	0.016	0	Unknown-1	prkg1a
0	0.930963	0.224	0.013	0	Unknown-1	mctp2b
0	0.922386	0.254	0.014	0	Unknown-1	si:ch211-130m23.2
0	0.910711	0.21	0.009	0	Unknown-1	anos1a
0	0.897191	0.222	0.004	0	Unknown-1	zgc:152891
0	0.884094	0.203	0.004	0	Unknown-1	si:dkeyp-72h1.1
0	0.871536	0.214	0.006	0	Unknown-1	igdcc4
0	0.851176	0.215	0.01	0	Unknown-1	ncaldb
0	0.844766	0.251	0.015	0	Unknown-1	tbc1d10ab
0	0.839429	0.214	0.004	0	Unknown-1	ptpn18
0	0.82715	0.199	0.002	0	Unknown-1	fat1b
0	0.799338	0.176	0.007	0	Unknown-1	capn8
0	0.791426	0.219	0.017	0	Unknown-1	slc3a2a
0	0.786144	0.166	0.008	0	Unknown-1	crhbp
0	0.775066	0.2	0.007	0	Unknown-1	si:dkey-83f18.4
0	0.769583	0.188	0.001	0	Unknown-1	si:ch211-121j5.4
0	0.761508	0.196	0.014	0	Unknown-1	dok1b
0	0.75276	0.165	0.002	0	Unknown-1	gpr171
0	0.7497	0.159	0.006	0	Unknown-1	nr4a2b
0	0.746774	0.167	0.002	0	Unknown-1	tuba1c
0	0.746743	0.211	0.01	0	Unknown-1	pik3cg
0	0.739134	0.165	0	0	Unknown-1	gata1a
0	0.726409	0.17	0.002	0	Unknown-1	CAMK2N1
0	0.724279	0.148	0.004	0	Unknown-1	creb3l3b
0	0.724039	0.165	0.008	0	Unknown-1	arhgef7a
0	0.711688	0.185	0.007	0	Unknown-1	ftr87
0	0.705592	0.189	0	0	Unknown-1	btr33
0	0.688594	0.158	0.004	0	Unknown-1	tmprss2
0	0.688281	0.118	0.004	0	Unknown-1	BX510306.1
0	0.678138	0.155	0.001	0	Unknown-1	si:dkeyp-93a5.2.1
0	0.6613	0.15	0.006	0	Unknown-1	map3k10
0	0.656071	0.162	0.006	0	Unknown-1	CR812470.1
0	0.655202	0.17	0.004	0	Unknown-1	ponzr6
0	0.654582	0.134	0.004	0	Unknown-1	gpr153
0	0.649619	0.15	0.008	0	Unknown-1	nrcama
0	0.646363	0.141	0.008	0	Unknown-1	ccser2a
0	0.63603	0.159	0.007	0	Unknown-1	ric8a
0	0.628981	0.155	0.006	0	Unknown-1	dapk2a
0	0.613896	0.169	0.007	0	Unknown-1	pip5k1ba
0	0.602772	0.141	0.001	0	Unknown-1	si:dkey-61f9.1
0	0.602006	0.145	0.001	0	Unknown-1	si:dkeyp-82a1.3
0	0.577861	0.134	0.002	0	Unknown-1	si:dkey-197j19.6
0	0.575804	0.139	0.001	0	Unknown-1	zgc:158412
0	0.572159	0.11	0.003	0	Unknown-1	tspeara
0	0.565064	0.133	0.006	0	Unknown-1	spns3
0	0.563076	0.122	0.001	0	Unknown-1	si:dkey-85k7.11
0	0.529868	0.117	0.004	0	Unknown-1	si:ch211-282j17.8
0	0.528168	0.123	0.002	0	Unknown-1	si:dkey-83f18.2
0	0.494074	0.119	0.006	0	Unknown-1	nfatc2b
0	0.489356	0.118	0.002	0	Unknown-1	sox8b
0	0.485046	0.128	0.006	0	Unknown-1	arhgap12b
0	0.481037	0.117	0.003	0	Unknown-1	si:dkey-28d5.13
0	0.406513	0.107	0.004	0	Unknown-1	OTUD7A
1.68229e-303	1.6522	0.111	0.005	4.10143e-299	Unknown-1	dkk2
4.82008e-300	1.44166	0.593	0.128	1.17514e-295	Unknown-1	eps8l2
1.86065e-299	0.828689	0.163	0.011	4.53628e-295	Unknown-1	otog
3.23037e-297	0.335149	0.1	0.004	7.87563e-293	Unknown-1	znf831
1.60961e-295	1.40163	0.509	0.1	3.92424e-291	Unknown-1	kalrnb
5.53316e-293	1.12267	0.317	0.041	1.34899e-288	Unknown-1	tnfsf13b
7.31899e-290	0.940615	0.206	0.018	1.78437e-285	Unknown-1	ptpn6
2.51505e-289	1.50077	0.583	0.131	6.1317e-285	Unknown-1	grasp
5.14853e-289	1.54466	0.558	0.123	1.25521e-284	Unknown-1	atp11c
3.86885e-288	0.772301	0.2	0.017	9.43226e-284	Unknown-1	pttg1ipb
2.53498e-287	0.734984	0.188	0.015	6.18028e-283	Unknown-1	zgc:158403
4.51615e-278	1.4224	0.401	0.068	1.10104e-273	Unknown-1	ppm1e
5.15705e-265	1.22399	0.37	0.061	1.25729e-260	Unknown-1	lrch1
4.33457e-261	1.19544	0.333	0.05	1.05677e-256	Unknown-1	fnbp1b
3.11764e-256	0.971693	0.267	0.033	7.60079e-252	Unknown-1	abca2
2.59515e-251	1.40976	0.314	0.046	6.32698e-247	Unknown-1	zfpm1
1.95327e-245	0.42024	0.119	0.007	4.76206e-241	Unknown-1	grap2b
2.11251e-240	0.498856	0.111	0.006	5.1503e-236	Unknown-1	si:ch211-282j17.10
3.9363e-239	1.40514	0.538	0.132	9.59671e-235	Unknown-1	si:dkey-172h23.2
6.98592e-239	0.941751	0.285	0.04	1.70317e-234	Unknown-1	mcf2la
1.06237e-235	0.68677	0.15	0.012	2.59005e-231	Unknown-1	espn
2.22064e-232	1.2786	0.501	0.116	5.41392e-228	Unknown-1	gnao1a
8.61794e-232	1.02866	0.24	0.03	2.10105e-227	Unknown-1	id2b
2.62542e-230	0.898365	0.169	0.015	6.40078e-226	Unknown-1	dachd
2.27066e-226	0.950772	0.302	0.046	5.53588e-222	Unknown-1	map4k6
8.39442e-225	0.812306	0.23	0.028	2.04656e-220	Unknown-1	BX546453.1
5.81854e-213	1.67952	0.743	0.286	1.41856e-208	Unknown-1	add3a
7.38544e-212	0.693316	0.126	0.009	1.80057e-207	Unknown-1	serpini1
2.17798e-210	0.976918	0.261	0.038	5.30991e-206	Unknown-1	FOXN2
5.17186e-210	1.07762	0.236	0.031	1.2609e-205	Unknown-1	si:ch211-161h7.5
2.96796e-209	1.10658	0.248	0.035	7.2359e-205	Unknown-1	cacna2d2a
2.6297e-208	0.654167	0.222	0.028	6.4112e-204	Unknown-1	ADGRL3
7.47765e-207	0.700992	0.188	0.021	1.82305e-202	Unknown-1	agr2
2.99717e-205	0.820872	0.199	0.023	7.3071e-201	Unknown-1	chn1
4.31892e-205	0.889107	0.278	0.043	1.05295e-200	Unknown-1	rgl2
2.9159e-204	0.756225	0.191	0.022	7.10897e-200	Unknown-1	tox
3.93209e-204	0.919916	0.291	0.047	9.58643e-200	Unknown-1	slc4a4b
[truncated: 203 more rows]

## Sheet: Supplementary Table S1D
Supplementary Table S1. Basic QC and cell type differentially expressed features
D Cell type DARs
p_val	avg_log2FC	pct.1	pct.2	p_val_adj	cell types	peaks
0	0.879928	0.362	0.046	0	Superficial_Epithelial	chr10-6952149-6953505
0	0.803947	0.258	0.02	0	Superficial_Epithelial	chr17-24860747-24861572
0	0.802614	0.364	0.062	0	Superficial_Epithelial	chr7-19831516-19832723
0	0.797261	0.365	0.063	0	Superficial_Epithelial	chr3-62165405-62166596
0	0.795873	0.243	0.016	0	Superficial_Epithelial	chr1-19424294-19425249
0	0.795239	0.247	0.018	0	Superficial_Epithelial	chr24-36854007-36854784
0	0.776605	0.374	0.075	0	Superficial_Epithelial	chr25-32874546-32875476
0	0.75106	0.424	0.107	0	Superficial_Epithelial	chr4-58666938-58669542
0	0.750847	0.293	0.044	0	Superficial_Epithelial	chr7-19221541-19222290
0	0.74984	0.341	0.067	0	Superficial_Epithelial	chr15-9471074-9472161
0	0.748233	0.248	0.026	0	Superficial_Epithelial	chr18-47390514-47391383
0	0.747738	0.424	0.106	0	Superficial_Epithelial	chr20-27405252-27408036
0	0.745431	0.241	0.024	0	Superficial_Epithelial	chr7-32555424-32556596
0	0.744139	0.219	0.016	0	Superficial_Epithelial	chr21-22808050-22809370
0	0.732974	0.219	0.017	0	Superficial_Epithelial	chr3-8822896-8823497
0	0.732882	0.257	0.033	0	Superficial_Epithelial	chr10-35360640-35361517
0	0.732717	0.267	0.036	0	Superficial_Epithelial	chr5-55583657-55585431
0	0.732712	0.357	0.078	0	Superficial_Epithelial	chr5-62979162-62980553
0	0.727281	0.246	0.028	0	Superficial_Epithelial	chr20-54851057-54853257
0	0.726353	0.23	0.022	0	Superficial_Epithelial	chr7-56891027-56892236
0	0.724713	0.203	0.011	0	Superficial_Epithelial	chr15-12350569-12353222
0	0.723411	0.238	0.026	0	Superficial_Epithelial	chr23-2140303-2141067
0	0.721383	0.29	0.049	0	Superficial_Epithelial	chr4-20261379-20263426
0	0.717684	0.192	0.01	0	Superficial_Epithelial	chr5-12571058-12571862
0	0.704662	0.368	0.091	0	Superficial_Epithelial	chr3-27698142-27700099
0	0.702764	0.219	0.022	0	Superficial_Epithelial	chr15-2736166-2737509
0	0.699479	0.236	0.028	0	Superficial_Epithelial	chr5-15287734-15289322
0	0.691823	0.232	0.029	0	Superficial_Epithelial	chr20-27400868-27401775
0	0.691636	0.426	0.137	0	Superficial_Epithelial	chr20-28268545-28271326
0	0.686367	0.189	0.012	0	Superficial_Epithelial	chr3-19495693-19496723
0	0.686197	0.191	0.014	0	Superficial_Epithelial	chr20-2603696-2604707
0	0.684931	0.294	0.053	0	Superficial_Epithelial	chr1-45171642-45173427
0	0.684426	0.266	0.044	0	Superficial_Epithelial	chr3-5470894-5472148
0	0.673823	0.184	0.013	0	Superficial_Epithelial	chr20-21376291-21377304
0	0.670053	0.226	0.031	0	Superficial_Epithelial	chr2-55650423-55651419
0	0.667856	0.211	0.024	0	Superficial_Epithelial	chr7-19217738-19218604
0	0.667462	0.234	0.037	0	Superficial_Epithelial	chr8-30955911-30956832
0	0.666316	0.363	0.105	0	Superficial_Epithelial	chr3-54623707-54625857
0	0.665937	0.247	0.041	0	Superficial_Epithelial	chr13-22679251-22681350
0	0.664237	0.236	0.035	0	Superficial_Epithelial	chr7-32492796-32493757
0	0.664189	0.245	0.041	0	Superficial_Epithelial	chr16-50949470-50950544
0	0.664121	0.572	0.242	0	Superficial_Epithelial	chr25-273477-275862
0	0.661786	0.222	0.03	0	Superficial_Epithelial	chr7-29686460-29687134
0	0.66168	0.305	0.07	0	Superficial_Epithelial	chr1-54698477-54699726
0	0.661633	0.188	0.016	0	Superficial_Epithelial	chr6-39108477-39109841
0	0.659416	0.205	0.024	0	Superficial_Epithelial	chr3-36828687-36829293
0	0.657475	0.237	0.037	0	Superficial_Epithelial	chr20-34409908-34410880
0	0.65481	0.2	0.022	0	Superficial_Epithelial	chr23-9529455-9530612
0	0.65455	0.238	0.039	0	Superficial_Epithelial	chr19-8835723-8837039
0	0.654225	0.327	0.081	0	Superficial_Epithelial	chr15-2640151-2641268
0	0.653576	0.253	0.045	0	Superficial_Epithelial	chr8-50248664-50249566
0	0.65288	0.383	0.116	0	Superficial_Epithelial	chr20-26682573-26685129
0	0.652542	0.275	0.058	0	Superficial_Epithelial	chr16-11038661-11040190
0	0.65193	0.215	0.03	0	Superficial_Epithelial	chr2-27437270-27438284
0	0.650267	0.317	0.076	0	Superficial_Epithelial	chr3-36487704-36488949
0	0.64958	0.326	0.081	0	Superficial_Epithelial	chr1-26411309-26413538
0	0.649552	0.17	0.011	0	Superficial_Epithelial	chr6-15195651-15196280
0	0.648242	0.264	0.053	0	Superficial_Epithelial	chr4-11598205-11599432
0	0.64787	0.157	0.007	0	Superficial_Epithelial	chr1-19422528-19422974
0	0.64537	0.165	0.01	0	Superficial_Epithelial	chr6-19550127-19550841
0	0.6447	0.207	0.028	0	Superficial_Epithelial	chr6-25359541-25360341
0	0.642215	0.187	0.019	0	Superficial_Epithelial	chr1-52414767-52415620
0	0.640469	0.199	0.025	0	Superficial_Epithelial	chr4-10626474-10627156
0	0.63974	0.174	0.014	0	Superficial_Epithelial	chr18-7528560-7529050
0	0.638613	0.183	0.018	0	Superficial_Epithelial	chr14-11411019-11411888
0	0.635265	0.215	0.032	0	Superficial_Epithelial	chr1-52317364-52319134
0	0.631252	0.287	0.069	0	Superficial_Epithelial	chr5-63146923-63147816
0	0.631151	0.167	0.013	0	Superficial_Epithelial	chr7-32558372-32559463
0	0.626326	0.178	0.019	0	Superficial_Epithelial	chr10-36783493-36784893
0	0.625853	0.223	0.038	0	Superficial_Epithelial	chr2-59234959-59236184
0	0.624823	0.24	0.045	0	Superficial_Epithelial	chr10-40791750-40792966
0	0.624652	0.182	0.019	0	Superficial_Epithelial	chr3-62160882-62161332
0	0.624275	0.323	0.09	0	Superficial_Epithelial	chr4-21329753-21331859
0	0.62395	0.222	0.036	0	Superficial_Epithelial	chr25-34855624-34856721
0	0.623788	0.229	0.041	0	Superficial_Epithelial	chr1-38387808-38388863
0	0.623686	0.192	0.023	0	Superficial_Epithelial	chr13-32207675-32209021
0	0.623493	0.409	0.136	0	Superficial_Epithelial	chr12-44077140-44078116
0	0.622903	0.218	0.037	0	Superficial_Epithelial	chr20-26304894-26306121
0	0.622867	0.238	0.045	0	Superficial_Epithelial	chr1-52400488-52403111
0	0.622821	0.243	0.048	0	Superficial_Epithelial	chr12-18447215-18448835
0	0.62258	0.197	0.026	0	Superficial_Epithelial	chr20-8106489-8107752
0	0.621513	0.208	0.031	0	Superficial_Epithelial	chr22-36584712-36585998
0	0.621244	0.25	0.051	0	Superficial_Epithelial	chr14-48898886-48900291
0	0.621204	0.165	0.014	0	Superficial_Epithelial	chr14-11416602-11417274
0	0.62052	0.246	0.049	0	Superficial_Epithelial	chr1-38460040-38460979
0	0.618986	0.18	0.02	0	Superficial_Epithelial	chr20-3407055-3407476
0	0.618733	0.174	0.018	0	Superficial_Epithelial	chr23-27044041-27044806
0	0.616694	0.226	0.041	0	Superficial_Epithelial	chr8-53281518-53282583
0	0.614081	0.18	0.021	0	Superficial_Epithelial	chr7-56926106-56927014
0	0.613958	0.289	0.073	0	Superficial_Epithelial	chr5-57473833-57474657
0	0.613856	0.182	0.021	0	Superficial_Epithelial	chr10-40800545-40801947
0	0.613555	0.247	0.05	0	Superficial_Epithelial	chr1-45195251-45196434
0	0.613379	0.212	0.036	0	Superficial_Epithelial	chr4-14208653-14209906
0	0.613364	0.155	0.011	0	Superficial_Epithelial	chr21-40632135-40633275
0	0.61313	0.38	0.131	0	Superficial_Epithelial	chr5-9813382-9814237
0	0.61305	0.16	0.013	0	Superficial_Epithelial	chr23-31994125-31994947
0	0.613004	0.378	0.122	0	Superficial_Epithelial	chr1-52390833-52392524
0	0.612971	0.215	0.036	0	Superficial_Epithelial	chr5-16172208-16172978
0	0.612384	0.263	0.061	0	Superficial_Epithelial	chr23-293987-295766
0	0.611937	0.206	0.031	0	Superficial_Epithelial	chr6-15200008-15201425
0	0.611742	0.201	0.03	0	Superficial_Epithelial	chr11-40119497-40120180
0	0.611536	0.277	0.067	0	Superficial_Epithelial	chr13-5842991-5844448
0	0.610936	0.193	0.026	0	Superficial_Epithelial	chr8-22301603-22302613
0	0.609337	0.178	0.019	0	Superficial_Epithelial	chr8-20895584-20897307
0	0.608984	0.186	0.024	0	Superficial_Epithelial	chr2-22860280-22861035
0	0.608569	0.181	0.022	0	Superficial_Epithelial	chr18-383864-384570
0	0.607413	0.202	0.032	0	Superficial_Epithelial	chr2-58768148-58769004
0	0.606777	0.198	0.029	0	Superficial_Epithelial	chr13-37598225-37599173
0	0.604202	0.156	0.011	0	Superficial_Epithelial	chr20-34407697-34408524
0	0.603841	0.197	0.028	0	Superficial_Epithelial	chr22-27584229-27586173
0	0.603297	0.153	0.01	0	Superficial_Epithelial	chr12-38930891-38932312
0	0.60318	0.244	0.052	0	Superficial_Epithelial	chr3-46289245-46290601
0	0.602952	0.286	0.077	0	Superficial_Epithelial	chr1-59518799-59519834
0	0.601439	0.181	0.023	0	Superficial_Epithelial	chr9-17330993-17332036
0	0.601332	0.166	0.016	0	Superficial_Epithelial	chr20-34419962-34421134
0	0.601256	0.241	0.052	0	Superficial_Epithelial	chr14-41344853-41345577
0	0.601017	0.3	0.082	0	Superficial_Epithelial	chr17-37751344-37752917
0	0.599513	0.234	0.049	0	Superficial_Epithelial	chr2-27474035-27475204
0	0.599434	0.289	0.076	0	Superficial_Epithelial	chr4-2225500-2226875
0	0.598671	0.216	0.039	0	Superficial_Epithelial	chr8-7713900-7714572
0	0.598589	0.172	0.02	0	Superficial_Epithelial	chr24-38688234-38689115
0	0.597941	0.154	0.012	0	Superficial_Epithelial	chr4-38550340-38551443
0	0.597324	0.17	0.019	0	Superficial_Epithelial	chr20-2592169-2592619
0	0.596489	0.16	0.014	0	Superficial_Epithelial	chr24-21771394-21772242
0	0.596082	0.247	0.056	0	Superficial_Epithelial	chr1-53215274-53217358
0	0.594353	0.152	0.012	0	Superficial_Epithelial	chr1-54649560-54650281
0	0.593621	0.222	0.043	0	Superficial_Epithelial	chr12-44071677-44073117
0	0.593257	0.18	0.024	0	Superficial_Epithelial	chr14-22296600-22297573
0	0.591985	0.163	0.017	0	Superficial_Epithelial	chr3-12426919-12427733
0	0.5914	0.163	0.017	0	Superficial_Epithelial	chr12-26477863-26478850
0	0.590643	0.154	0.013	0	Superficial_Epithelial	chr12-44000259-44001084
0	0.590436	0.15	0.012	0	Superficial_Epithelial	chr6-28011388-28012195
0	0.590013	0.286	0.081	0	Superficial_Epithelial	chr24-4082827-4083643
0	0.58977	0.271	0.069	0	Superficial_Epithelial	chr23-32207708-32208473
0	0.589262	0.237	0.051	0	Superficial_Epithelial	chr11-5787372-5788457
0	0.588453	0.162	0.017	0	Superficial_Epithelial	chr3-16830152-16831381
0	0.587648	0.34	0.11	0	Superficial_Epithelial	chr6-55342379-55343672
0	0.586893	0.162	0.018	0	Superficial_Epithelial	chr17-23460175-23460889
0	0.586504	0.172	0.022	0	Superficial_Epithelial	chr7-38578917-38579501
0	0.586449	0.215	0.042	0	Superficial_Epithelial	chr9-56445917-56447572
0	0.584647	0.232	0.052	0	Superficial_Epithelial	chr2-774383-775088
0	0.584449	0.247	0.057	0	Superficial_Epithelial	chr22-665558-666612
0	0.583655	0.164	0.019	0	Superficial_Epithelial	chr11-25284733-25285315
0	0.582894	0.176	0.024	0	Superficial_Epithelial	chr13-32341995-32342911
0	0.582669	0.169	0.021	0	Superficial_Epithelial	chr6-30908699-30909628
0	0.581656	0.226	0.047	0	Superficial_Epithelial	chr25-35177848-35178630
0	0.577618	0.278	0.077	0	Superficial_Epithelial	chr15-43380563-43381230
0	0.577508	0.336	0.11	0	Superficial_Epithelial	chr18-44311825-44312900
0	0.577495	0.158	0.016	0	Superficial_Epithelial	chr19-7690581-7692313
0	0.576726	0.235	0.055	0	Superficial_Epithelial	chr6-52516522-52518243
0	0.576478	0.174	0.025	0	Superficial_Epithelial	chr5-13583737-13585106
0	0.575939	0.291	0.086	0	Superficial_Epithelial	chr14-21067285-21067968
0	0.575639	0.208	0.042	0	Superficial_Epithelial	chr1-56751044-56751865
0	0.575637	0.195	0.033	0	Superficial_Epithelial	chr20-33662909-33663707
0	0.5747	0.308	0.096	0	Superficial_Epithelial	chr1-2051545-2052275
0	0.574233	0.25	0.062	0	Superficial_Epithelial	chr12-844833-846168
0	0.574202	0.18	0.027	0	Superficial_Epithelial	chr16-23345983-23346731
0	0.574188	0.347	0.117	0	Superficial_Epithelial	chr14-34903659-34905567
0	0.573731	0.217	0.046	0	Superficial_Epithelial	chr18-43983880-43984297
0	0.573715	0.203	0.039	0	Superficial_Epithelial	chr19-35215962-35216930
0	0.573356	0.158	0.018	0	Superficial_Epithelial	chr3-57711193-57712112
0	0.573224	0.18	0.027	0	Superficial_Epithelial	chr12-46058671-46059226
0	0.572454	0.198	0.036	0	Superficial_Epithelial	chr12-43774794-43777315
0	0.571756	0.18	0.028	0	Superficial_Epithelial	chr8-13586412-13587119
0	0.571697	0.216	0.044	0	Superficial_Epithelial	chr8-18650171-18651344
0	0.571491	0.169	0.022	0	Superficial_Epithelial	chr20-36704227-36705084
0	0.571073	0.198	0.036	0	Superficial_Epithelial	chr10-2721493-2722399
0	0.570856	0.185	0.029	0	Superficial_Epithelial	chr5-38028579-38030164
0	0.5707	0.176	0.025	0	Superficial_Epithelial	chr17-16065502-16066414
0	0.568458	0.192	0.032	0	Superficial_Epithelial	chr22-27636680-27638008
0	0.568391	0.259	0.068	0	Superficial_Epithelial	chr3-16809360-16811107
0	0.568016	0.256	0.067	0	Superficial_Epithelial	chr25-19703248-19705320
0	0.567147	0.294	0.089	0	Superficial_Epithelial	chr2-37564529-37566723
0	0.565654	0.391	0.154	0	Superficial_Epithelial	chr5-68248093-68249095
0	0.565357	0.17	0.024	0	Superficial_Epithelial	chr11-25282262-25283375
0	0.564959	0.207	0.042	0	Superficial_Epithelial	chr9-9108737-9109244
0	0.564199	0.243	0.059	0	Superficial_Epithelial	chr7-19194427-19195276
0	0.563499	0.266	0.075	0	Superficial_Epithelial	chr7-20283693-20284530
0	0.56318	0.158	0.019	0	Superficial_Epithelial	chr6-4164281-4164940
0	0.562899	0.197	0.037	0	Superficial_Epithelial	chr6-47777641-47779118
0	0.56258	0.146	0.013	0	Superficial_Epithelial	chr1-52324219-52324963
0	0.562039	0.232	0.057	0	Superficial_Epithelial	chr1-18652435-18653215
0	0.561937	0.259	0.069	0	Superficial_Epithelial	chr21-25261166-25262122
0	0.561828	0.151	0.016	0	Superficial_Epithelial	chr5-42013189-42013668
0	0.561818	0.204	0.041	0	Superficial_Epithelial	chr9-30254686-30255533
0	0.560909	0.137	0.011	0	Superficial_Epithelial	chr21-12016451-12017882
0	0.560736	0.144	0.013	0	Superficial_Epithelial	chr19-24866437-24867166
0	0.560268	0.187	0.033	0	Superficial_Epithelial	chr14-21939395-21940064
0	0.559307	0.164	0.023	0	Superficial_Epithelial	chr21-30122335-30123313
0	0.559303	0.131	0.008	0	Superficial_Epithelial	chr2-16170996-16171366
0	0.558835	0.228	0.055	0	Superficial_Epithelial	chr18-23151070-23151837
0	0.557753	0.227	0.054	0	Superficial_Epithelial	chr25-32839689-32841016
0	0.557146	0.161	0.021	0	Superficial_Epithelial	chr15-30969601-30970276
0	0.55666	0.164	0.022	0	Superficial_Epithelial	chr9-51567996-51568493
0	0.556612	0.152	0.018	0	Superficial_Epithelial	chr16-41127104-41127674
0	0.55623	0.141	0.013	0	Superficial_Epithelial	chr16-20052417-20052943
0	0.556015	0.181	0.029	0	Superficial_Epithelial	chr7-32525602-32526949
0	0.554996	0.348	0.126	0	Superficial_Epithelial	chr18-45705156-45706466
0	0.554947	0.172	0.025	0	Superficial_Epithelial	chr7-999086-1000712
0	0.554942	0.251	0.067	0	Superficial_Epithelial	chr2-37848842-37850661
0	0.55424	0.34	0.114	0	Superficial_Epithelial	chr1-45177080-45178720
0	0.554088	0.223	0.052	0	Superficial_Epithelial	chr21-36538451-36539394
0	0.553381	0.204	0.043	0	Superficial_Epithelial	chr17-38137900-38138700
0	0.553248	0.343	0.12	0	Superficial_Epithelial	chr25-7572107-7573656
0	0.552452	0.313	0.104	0	Superficial_Epithelial	chr14-32701752-32702557
0	0.551316	0.177	0.028	0	Superficial_Epithelial	chr5-38430620-38431555
0	0.551109	0.322	0.11	0	Superficial_Epithelial	chr7-50612947-50614390
0	0.551068	0.128	0.008	0	Superficial_Epithelial	chr19-26830919-26831723
0	0.550889	0.157	0.02	0	Superficial_Epithelial	chr20-34400426-34401189
0	0.550407	0.123	0.007	0	Superficial_Epithelial	chr22-36578460-36579060
0	0.549789	0.351	0.133	0	Superficial_Epithelial	chr4-59251306-59253518
0	0.549639	0.157	0.021	0	Superficial_Epithelial	chr14-8868823-8869573
0	0.54893	0.123	0.007	0	Superficial_Epithelial	chr3-5096289-5097303
0	0.548918	0.195	0.039	0	Superficial_Epithelial	chr25-5288054-5288869
0	0.54852	0.186	0.034	0	Superficial_Epithelial	chr17-43928589-43929495
0	0.547691	0.122	0.007	0	Superficial_Epithelial	chr19-24786645-24787513
0	0.547565	0.263	0.074	0	Superficial_Epithelial	chr12-38975797-38977803
0	0.54746	0.218	0.051	0	Superficial_Epithelial	chr20-21542395-21543515
0	0.547459	0.181	0.033	0	Superficial_Epithelial	chr11-30392416-30393298
0	0.547172	0.144	0.016	0	Superficial_Epithelial	chr24-5831022-5831902
0	0.547041	0.206	0.045	0	Superficial_Epithelial	chr13-17037687-17039105
0	0.546476	0.139	0.012	0	Superficial_Epithelial	chr3-8823701-8824796
0	0.546261	0.148	0.016	0	Superficial_Epithelial	chr14-4310233-4311170
0	0.546073	0.235	0.06	0	Superficial_Epithelial	chr3-27678239-27679849
0	0.545998	0.27	0.084	0	Superficial_Epithelial	chr3-832354-834253
0	0.545268	0.272	0.081	0	Superficial_Epithelial	chr14-41361962-41362838
0	0.544473	0.169	0.026	0	Superficial_Epithelial	chr6-28246113-28247346
0	0.544364	0.181	0.032	0	Superficial_Epithelial	chr1-59399138-59400123
0	0.544304	0.324	0.111	0	Superficial_Epithelial	chr13-7341923-7343910
0	0.544291	0.134	0.012	0	Superficial_Epithelial	chr7-66042117-66042895
0	0.543293	0.158	0.022	0	Superficial_Epithelial	chr16-20312020-20312609
0	0.54329	0.375	0.152	0	Superficial_Epithelial	chr17-26910791-26912333
0	0.5427	0.23	0.059	0	Superficial_Epithelial	chr18-23390031-23391784
0	0.542441	0.195	0.039	0	Superficial_Epithelial	chr11-30550556-30551397
0	0.542354	0.136	0.013	0	Superficial_Epithelial	chr3-48305587-48305973
0	0.542045	0.181	0.033	0	Superficial_Epithelial	chr19-5335119-5335911
0	0.541825	0.252	0.071	0	Superficial_Epithelial	chr10-28815134-28817379
0	0.539996	0.199	0.042	0	Superficial_Epithelial	chr1-34674306-34675274
0	0.539611	0.185	0.034	0	Superficial_Epithelial	chr14-37681242-37683031
0	0.538942	0.19	0.038	0	Superficial_Epithelial	chr3-47157022-47157986
0	0.538934	0.163	0.026	0	Superficial_Epithelial	chr19-3355004-3355532
0	0.538287	0.176	0.03	0	Superficial_Epithelial	chr8-20871170-20873452
0	0.537487	0.211	0.049	0	Superficial_Epithelial	chr24-21894494-21895755
0	0.537275	0.135	0.013	0	Superficial_Epithelial	chr15-12125509-12126415
0	0.536819	0.193	0.04	0	Superficial_Epithelial	chr7-67215586-67216813
0	0.536228	0.138	0.014	0	Superficial_Epithelial	chr14-31870371-31870980
0	0.536055	0.267	0.08	0	Superficial_Epithelial	chr23-5062616-5064023
0	0.535921	0.262	0.082	0	Superficial_Epithelial	chr3-36158638-36160062
0	0.535861	0.13	0.011	0	Superficial_Epithelial	chr6-45926216-45927431
0	0.535845	0.193	0.042	0	Superficial_Epithelial	chr5-20506468-20508158
0	0.535121	0.224	0.057	0	Superficial_Epithelial	chr19-4738499-4739842
0	0.535063	0.15	0.02	0	Superficial_Epithelial	chr19-31890614-31891605
0	0.534908	0.222	0.056	0	Superficial_Epithelial	chr18-22099333-22100159
0	0.533969	0.223	0.057	0	Superficial_Epithelial	chr15-17852347-17853542
0	0.533594	0.198	0.043	0	Superficial_Epithelial	chr21-29064650-29065718
0	0.533288	0.219	0.056	0	Superficial_Epithelial	chr12-34209147-34210240
0	0.532925	0.338	0.128	0	Superficial_Epithelial	chr7-33700099-33701363
0	0.532779	0.236	0.063	0	Superficial_Epithelial	chr18-44316586-44317454
0	0.532633	0.19	0.038	0	Superficial_Epithelial	chr20-27403337-27403746
0	0.532117	0.245	0.071	0	Superficial_Epithelial	chr4-16509152-16510735
0	0.531857	0.126	0.011	0	Superficial_Epithelial	chr25-14183941-14184617
0	0.5317	0.305	0.107	0	Superficial_Epithelial	chr15-20720853-20722106
0	0.531685	0.176	0.033	0	Superficial_Epithelial	chr25-16073910-16074751
0	0.531666	0.277	0.088	0	Superficial_Epithelial	chr11-13146407-13147129
0	0.531361	0.377	0.149	0	Superficial_Epithelial	chr7-34263975-34266457
0	0.531121	0.187	0.038	0	Superficial_Epithelial	chr2-32587392-32588968
0	0.530869	0.257	0.076	0	Superficial_Epithelial	chr19-34094740-34096046
0	0.530699	0.209	0.049	0	Superficial_Epithelial	chr20-8085000-8085938
0	0.530315	0.125	0.009	0	Superficial_Epithelial	chr2-38722723-38723681
0	0.529462	0.166	0.029	0	Superficial_Epithelial	chr11-21096105-21097198
0	0.529365	0.133	0.013	0	Superficial_Epithelial	chr2-57224781-57225346
0	0.529263	0.19	0.04	0	Superficial_Epithelial	chr1-2030183-2032335
0	0.528691	0.13	0.012	0	Superficial_Epithelial	chr3-43979742-43980385
0	0.528667	0.14	0.016	0	Superficial_Epithelial	chr9-23754653-23755124
0	0.528527	0.178	0.033	0	Superficial_Epithelial	chr12-44123867-44125144
0	0.528416	0.125	0.01	0	Superficial_Epithelial	chr9-24246004-24246462
0	0.52784	0.148	0.02	0	Superficial_Epithelial	chr4-11486747-11487691
0	0.527679	0.2	0.045	0	Superficial_Epithelial	chr24-31900782-31901433
0	0.526984	0.171	0.031	0	Superficial_Epithelial	chr10-7274841-7276446
0	0.526855	0.143	0.019	0	Superficial_Epithelial	chr2-35681907-35682580
0	0.526713	0.265	0.081	0	Superficial_Epithelial	chr17-22551400-22553770
0	0.526669	0.174	0.032	0	Superficial_Epithelial	chr16-4087242-4088320
0	0.526473	0.15	0.021	0	Superficial_Epithelial	chr5-51046239-51047200
0	0.526473	0.189	0.04	0	Superficial_Epithelial	chr7-914128-914905
0	0.525925	0.116	0.006	0	Superficial_Epithelial	chr9-21369328-21369750
0	0.525106	0.184	0.038	0	Superficial_Epithelial	chr6-25291364-25293042
0	0.524956	0.168	0.03	0	Superficial_Epithelial	chr6-41514445-41515428
0	0.524751	0.185	0.037	0	Superficial_Epithelial	chr19-5338853-5339972
0	0.524471	0.149	0.021	0	Superficial_Epithelial	chr14-21937101-21937623
0	0.524376	0.15	0.021	0	Superficial_Epithelial	chr10-35355186-35356135
0	0.524321	0.162	0.028	0	Superficial_Epithelial	chr3-5120494-5121150
0	0.524266	0.275	0.091	0	Superficial_Epithelial	chr22-10525088-10525989
0	0.523287	0.179	0.035	0	Superficial_Epithelial	chr10-37053444-37054407
0	0.522609	0.215	0.054	0	Superficial_Epithelial	chr24-26309980-26311312
0	0.522231	0.15	0.021	0	Superficial_Epithelial	chr8-53273166-53273660
0	0.521079	0.252	0.076	0	Superficial_Epithelial	chr8-16740331-16741111
0	0.520988	0.133	0.014	0	Superficial_Epithelial	chr6-39094228-39095127
0	0.520689	0.308	0.107	0	Superficial_Epithelial	chr8-50245335-50246518
0	0.520325	0.208	0.051	0	Superficial_Epithelial	chr21-35276552-35278026
0	0.519748	0.221	0.058	0	Superficial_Epithelial	chr24-3485030-3486063
0	0.519666	0.211	0.053	0	Superficial_Epithelial	chr15-29597932-29599252
0	0.519153	0.166	0.03	0	Superficial_Epithelial	chr19-7579251-7580544
0	0.519052	0.167	0.03	0	Superficial_Epithelial	chr4-20253321-20253784
0	0.518626	0.283	0.093	0	Superficial_Epithelial	chr5-22392098-22394330
0	0.518593	0.258	0.082	0	Superficial_Epithelial	chr18-31064654-31065886
0	0.518278	0.155	0.025	0	Superficial_Epithelial	chr7-56902616-56903394
0	0.518156	0.234	0.065	0	Superficial_Epithelial	chr20-34402267-34403145
0	0.517938	0.178	0.036	0	Superficial_Epithelial	chr14-22292617-22294101
0	0.517724	0.169	0.031	0	Superficial_Epithelial	chr22-6463935-6466487
0	0.51765	0.217	0.056	0	Superficial_Epithelial	chr1-6072325-6073031
0	0.517158	0.26	0.082	0	Superficial_Epithelial	chr22-16228627-16229652
0	0.517005	0.401	0.171	0	Superficial_Epithelial	chr12-43687969-43689999
0	0.515929	0.13	0.013	0	Superficial_Epithelial	chr19-18752242-18753523
0	0.515897	0.23	0.068	0	Superficial_Epithelial	chr3-31935543-31936193
0	0.515868	0.229	0.063	0	Superficial_Epithelial	chr2-58063318-58065695
0	0.515659	0.224	0.062	0	Superficial_Epithelial	chr12-17162577-17164652
0	0.515247	0.143	0.02	0	Superficial_Epithelial	chr14-14663943-14665056
0	0.514593	0.116	0.008	0	Superficial_Epithelial	chr20-15746193-15746823
0	0.51452	0.205	0.052	0	Superficial_Epithelial	chr22-13119387-13120599
0	0.514237	0.199	0.047	0	Superficial_Epithelial	chr12-44265582-44267239
0	0.514053	0.14	0.018	0	Superficial_Epithelial	chr3-39488314-39489165
0	0.513826	0.171	0.034	0	Superficial_Epithelial	chr17-38141182-38142086
0	0.513798	0.25	0.076	0	Superficial_Epithelial	chr25-5248554-5250585
0	0.513422	0.362	0.156	0	Superficial_Epithelial	chr5-42096109-42098761
0	0.513029	0.148	0.022	0	Superficial_Epithelial	chr23-33373931-33374733
0	0.512595	0.123	0.011	0	Superficial_Epithelial	chr1-54666417-54666817
0	0.512283	0.355	0.146	0	Superficial_Epithelial	chr12-17336467-17337411
0	0.512257	0.168	0.031	0	Superficial_Epithelial	chr10-26677436-26678516
0	0.511972	0.203	0.051	0	Superficial_Epithelial	chr10-44419588-44420253
0	0.511692	0.238	0.068	0	Superficial_Epithelial	chr16-10673884-10675116
0	0.511683	0.124	0.011	0	Superficial_Epithelial	chr8-26287005-26287947
0	0.511185	0.245	0.075	0	Superficial_Epithelial	chr2-763294-764335
0	0.510476	0.227	0.065	0	Superficial_Epithelial	chr6-60236407-60237124
0	0.510431	0.136	0.017	0	Superficial_Epithelial	chr22-4704712-4705498
0	0.510122	0.257	0.084	0	Superficial_Epithelial	chr22-11745148-11746201
0	0.50986	0.204	0.051	0	Superficial_Epithelial	chr7-15754292-15755407
0	0.509763	0.135	0.017	0	Superficial_Epithelial	chr5-38037578-38038670
0	0.509433	0.159	0.028	0	Superficial_Epithelial	chr19-25007434-25008207
0	0.509406	0.123	0.011	0	Superficial_Epithelial	chr16-55206429-55206976
0	0.509207	0.15	0.024	0	Superficial_Epithelial	chr21-38522286-38523183
0	0.50869	0.205	0.051	0	Superficial_Epithelial	chr8-47187671-47189668
0	0.508067	0.151	0.025	0	Superficial_Epithelial	chr8-41612803-41614261
0	0.507821	0.389	0.166	0	Superficial_Epithelial	chr17-45807442-45811182
0	0.507733	0.232	0.065	0	Superficial_Epithelial	chr15-42994107-42995740
0	0.507526	0.123	0.011	0	Superficial_Epithelial	chr19-7657044-7658332
0	0.507396	0.215	0.059	0	Superficial_Epithelial	chr20-1261845-1263390
0	0.507311	0.131	0.015	0	Superficial_Epithelial	chr12-46112256-46113147
0	0.506389	0.112	0.007	0	Superficial_Epithelial	chr15-30905374-30906320
0	0.506	0.196	0.049	0	Superficial_Epithelial	chr25-4009557-4010681
0	0.505709	0.158	0.029	0	Superficial_Epithelial	chr8-32821314-32822160
0	0.50562	0.2	0.05	0	Superficial_Epithelial	chr16-16502647-16503776
0	0.505553	0.118	0.01	0	Superficial_Epithelial	chr3-19523291-19524063
0	0.505386	0.2	0.051	0	Superficial_Epithelial	chr13-24243665-24245595
0	0.504901	0.118	0.01	0	Superficial_Epithelial	chr9-40828087-40828585
0	0.504261	0.18	0.04	0	Superficial_Epithelial	chr19-15204887-15206205
0	0.504213	0.28	0.099	0	Superficial_Epithelial	chr3-5546696-5548428
0	0.503869	0.299	0.111	0	Superficial_Epithelial	chr2-22864519-22865749
0	0.503618	0.128	0.014	0	Superficial_Epithelial	chr1-52333471-52334244
0	0.503222	0.189	0.043	0	Superficial_Epithelial	chr3-3948545-3949844
0	0.501993	0.119	0.01	0	Superficial_Epithelial	chr9-7652409-7652818
0	0.501663	0.301	0.113	0	Superficial_Epithelial	chr12-43698386-43700314
0	0.501485	0.14	0.02	0	Superficial_Epithelial	chr18-22102287-22102734
0	0.501411	0.106	0.005	0	Superficial_Epithelial	chr12-38978435-38978784
0	0.500571	0.112	0.008	0	Superficial_Epithelial	chr16-45728956-45729808
0	0.500557	0.141	0.021	0	Superficial_Epithelial	chr4-3373861-3374746
0	0.500437	0.218	0.063	0	Superficial_Epithelial	chr22-21949958-21951684
0	0.500342	0.2	0.051	0	Superficial_Epithelial	chr11-21134273-21135677
0	0.500256	0.261	0.087	0	Superficial_Epithelial	chr2-266110-268144
0	0.500247	0.312	0.118	0	Superficial_Epithelial	chr15-42573672-42575742
0	0.500158	0.255	0.083	0	Superficial_Epithelial	chr24-24276133-24276826
0	0.499951	0.29	0.104	0	Superficial_Epithelial	chr14-8440580-8441650
0	0.499296	0.166	0.032	0	Superficial_Epithelial	chr3-6211437-6212443
0	0.498895	0.131	0.017	0	Superficial_Epithelial	chr21-22956769-22957355
0	0.498878	0.28	0.102	0	Superficial_Epithelial	chr3-48279905-48280867
0	0.498749	0.143	0.022	0	Superficial_Epithelial	chr9-4384412-4385525
0	0.498581	0.179	0.04	0	Superficial_Epithelial	chr16-22307586-22308386
0	0.498516	0.157	0.029	0	Superficial_Epithelial	chr10-22127669-22128520
0	0.498412	0.152	0.027	0	Superficial_Epithelial	chr7-10711890-10713327
0	0.498358	0.289	0.107	0	Superficial_Epithelial	chr4-21444528-21447197
0	0.498282	0.16	0.031	0	Superficial_Epithelial	chr3-43876008-43876678
0	0.498194	0.206	0.056	0	Superficial_Epithelial	chr15-21766920-21768070
0	0.498148	0.131	0.017	0	Superficial_Epithelial	chr6-44071453-44072280
0	0.49771	0.148	0.024	0	Superficial_Epithelial	chr10-35121844-35122708
0	0.497687	0.22	0.062	0	Superficial_Epithelial	chr24-41774793-41775710
0	0.497196	0.136	0.02	0	Superficial_Epithelial	chr24-33370047-33370580
0	0.497117	0.196	0.05	0	Superficial_Epithelial	chr11-18205896-18206222
0	0.497105	0.247	0.08	0	Superficial_Epithelial	chr7-38906055-38907141
0	0.497084	0.239	0.074	0	Superficial_Epithelial	chr11-30555293-30555830
0	0.497027	0.229	0.067	0	Superficial_Epithelial	chr3-5117109-5117838
0	0.496855	0.146	0.024	0	Superficial_Epithelial	chr7-59412224-59413513
0	0.4966	0.252	0.085	0	Superficial_Epithelial	chr23-369279-371660
0	0.496333	0.196	0.049	0	Superficial_Epithelial	chr15-22025506-22026703
0	0.495724	0.153	0.027	0	Superficial_Epithelial	chr5-51035300-51036340
0	0.495669	0.173	0.038	0	Superficial_Epithelial	chr14-8607926-8608937
0	0.495264	0.114	0.009	0	Superficial_Epithelial	chr3-33239400-33240035
0	0.494761	0.108	0.007	0	Superficial_Epithelial	chr22-25832024-25832629
0	0.494642	0.326	0.131	0	Superficial_Epithelial	chr21-456478-457305
0	0.494215	0.132	0.017	0	Superficial_Epithelial	chr25-23550044-23550958
0	0.494184	0.143	0.022	0	Superficial_Epithelial	chr3-26792243-26792869
0	0.494168	0.133	0.017	0	Superficial_Epithelial	chr6-23684318-23685843
0	0.493679	0.197	0.05	0	Superficial_Epithelial	chr23-25164960-25166716
0	0.493605	0.223	0.066	0	Superficial_Epithelial	chr14-17136169-17138121
0	0.493049	0.21	0.059	0	Superficial_Epithelial	chr7-54571675-54573603
0	0.49212	0.187	0.047	0	Superficial_Epithelial	chr12-43626384-43627312
0	0.491885	0.11	0.009	0	Superficial_Epithelial	chr3-8093692-8094314
0	0.49151	0.199	0.052	0	Superficial_Epithelial	chr13-32245864-32247357
0	0.491379	0.214	0.062	0	Superficial_Epithelial	chr15-34886778-34887449
0	0.490987	0.245	0.08	0	Superficial_Epithelial	chr9-39754997-39756276
0	0.490552	0.251	0.086	0	Superficial_Epithelial	chr13-24895155-24895916
0	0.490533	0.313	0.122	0	Superficial_Epithelial	chr21-5703921-5705428
0	0.490422	0.277	0.103	0	Superficial_Epithelial	chr8-39977783-39979007
0	0.490284	0.216	0.062	0	Superficial_Epithelial	chr9-17298488-17300059
0	0.489534	0.236	0.073	0	Superficial_Epithelial	chr19-10944382-10946089
0	0.488827	0.174	0.039	0	Superficial_Epithelial	chr5-59566304-59567680
0	0.488692	0.168	0.036	0	Superficial_Epithelial	chr7-931428-932175
0	0.488633	0.144	0.023	0	Superficial_Epithelial	chr16-48753066-48753846
0	0.487815	0.21	0.059	0	Superficial_Epithelial	chr25-22024096-22025663
0	0.487422	0.187	0.047	0	Superficial_Epithelial	chr15-15472279-15473635
0	0.487157	0.275	0.101	0	Superficial_Epithelial	chr5-37363595-37365355
0	0.486988	0.137	0.02	0	Superficial_Epithelial	chr12-22369114-22370106
0	0.486925	0.177	0.041	0	Superficial_Epithelial	chr6-8013529-8014165
0	0.48673	0.295	0.113	0	Superficial_Epithelial	chr18-22106166-22108118
0	0.486369	0.146	0.025	0	Superficial_Epithelial	chr7-73704335-73705161
0	0.486213	0.123	0.014	0	Superficial_Epithelial	chr21-5695668-5696589
0	0.486116	0.184	0.044	0	Superficial_Epithelial	chr3-25245955-25247044
0	0.485682	0.174	0.039	0	Superficial_Epithelial	chr15-7086575-7087584
0	0.485356	0.257	0.089	0	Superficial_Epithelial	chr13-33330776-33332254
0	0.48528	0.293	0.114	0	Superficial_Epithelial	chr21-45653236-45653945
0	0.485231	0.215	0.063	0	Superficial_Epithelial	chr11-37823876-37824707
0	0.483574	0.179	0.042	0	Superficial_Epithelial	chr7-885173-886456
0	0.483428	0.156	0.031	0	Superficial_Epithelial	chr19-20731067-20731948
0	0.483361	0.422	0.201	0	Superficial_Epithelial	chr12-35722975-35724814
0	0.483029	0.108	0.008	0	Superficial_Epithelial	chr21-7754177-7755005
0	0.482743	0.141	0.024	0	Superficial_Epithelial	chr18-15893716-15894560
0	0.482661	0.177	0.041	0	Superficial_Epithelial	chr8-50482537-50483964
0	0.482456	0.213	0.063	0	Superficial_Epithelial	chr15-23748022-23748812
0	0.482396	0.108	0.008	0	Superficial_Epithelial	chr16-45730699-45731567
0	0.481982	0.122	0.015	0	Superficial_Epithelial	chr23-17355892-17356484
0	0.481863	0.2	0.055	0	Superficial_Epithelial	chr7-34733761-34734505
0	0.481801	0.191	0.052	0	Superficial_Epithelial	chr25-4586692-4587832
0	0.481766	0.206	0.06	0	Superficial_Epithelial	chr25-5272453-5274018
0	0.481282	0.105	0.008	0	Superficial_Epithelial	chr9-45627349-45628028
0	0.481276	0.19	0.05	0	Superficial_Epithelial	chr12-33409280-33409845
0	0.481238	0.456	0.226	0	Superficial_Epithelial	chr6-23055087-23057535
0	0.481205	0.198	0.053	0	Superficial_Epithelial	chr15-30234851-30235792
0	0.481186	0.29	0.112	0	Superficial_Epithelial	chr9-21943360-21944230
0	0.481054	0.208	0.061	0	Superficial_Epithelial	chr5-34730945-34731767
0	0.480922	0.279	0.104	0	Superficial_Epithelial	chr13-35973034-35974600
0	0.480848	0.196	0.053	0	Superficial_Epithelial	chr16-10709208-10710501
0	0.48078	0.109	0.009	0	Superficial_Epithelial	chr10-7277510-7278220
0	0.480178	0.124	0.015	0	Superficial_Epithelial	chr6-42494681-42495681
0	0.480172	0.121	0.014	0	Superficial_Epithelial	chr10-15039332-15039818
0	0.479925	0.135	0.021	0	Superficial_Epithelial	chr15-11902149-11904406
0	0.479921	0.228	0.073	0	Superficial_Epithelial	chr14-32872449-32873314
0	0.479815	0.411	0.197	0	Superficial_Epithelial	chr9-9103344-9104573
0	0.479614	0.23	0.074	0	Superficial_Epithelial	chr7-38921334-38922242
0	0.479435	0.184	0.046	0	Superficial_Epithelial	chr25-12792229-12793225
0	0.479206	0.261	0.092	0	Superficial_Epithelial	chr20-35756976-35758742
0	0.47892	0.239	0.08	0	Superficial_Epithelial	chr9-30266819-30267703
0	0.478756	0.335	0.141	0	Superficial_Epithelial	chr24-25318306-25319643
0	0.47841	0.1	0.006	0	Superficial_Epithelial	chr20-22108170-22108940
0	0.478297	0.126	0.018	0	Superficial_Epithelial	chr6-57424886-57425925
0	0.477888	0.13	0.019	0	Superficial_Epithelial	chr5-43434079-43434708
0	0.477346	0.21	0.062	0	Superficial_Epithelial	chr25-34306602-34307421
0	0.47734	0.283	0.107	0	Superficial_Epithelial	chr12-22923772-22925041
0	0.476994	0.221	0.07	0	Superficial_Epithelial	chr19-24872032-24872658
0	0.476922	0.239	0.082	0	Superficial_Epithelial	chr23-18421196-18422240
0	0.476601	0.154	0.031	0	Superficial_Epithelial	chr16-13414996-13416331
0	0.476481	0.229	0.076	0	Superficial_Epithelial	chr13-591169-592675
0	0.476341	0.114	0.011	0	Superficial_Epithelial	chr4-2227864-2228766
0	0.476084	0.219	0.068	0	Superficial_Epithelial	chr13-31947107-31948557
0	0.47567	0.122	0.016	0	Superficial_Epithelial	chr8-14597767-14598639
0	0.475353	0.172	0.04	0	Superficial_Epithelial	chr7-60232119-60233012
0	0.475116	0.259	0.095	0	Superficial_Epithelial	chr15-31141472-31143392
0	0.475091	0.127	0.017	0	Superficial_Epithelial	chr9-21956203-21957006
0	0.474856	0.151	0.03	0	Superficial_Epithelial	chr19-24835297-24835972
0	0.474746	0.338	0.145	0	Superficial_Epithelial	chr6-6780169-6781251
0	0.47461	0.151	0.029	0	Superficial_Epithelial	chr11-20350684-20351828
0	0.474515	0.143	0.026	0	Superficial_Epithelial	chr22-3129338-3130439
0	0.47438	0.185	0.049	0	Superficial_Epithelial	chr7-17688229-17689581
0	0.474104	0.247	0.086	0	Superficial_Epithelial	chr17-30635307-30636349
0	0.472759	0.324	0.137	0	Superficial_Epithelial	chr17-22599162-22601254
0	0.472657	0.301	0.121	0	Superficial_Epithelial	chr19-19456334-19457750
0	0.472621	0.338	0.149	0	Superficial_Epithelial	chr7-36115397-36116261
0	0.472602	0.129	0.019	0	Superficial_Epithelial	chr1-45099497-45100542
0	0.471858	0.165	0.037	0	Superficial_Epithelial	chr7-23710270-23711397
0	0.471499	0.236	0.077	0	Superficial_Epithelial	chr4-51546627-51548774
0	0.471403	0.138	0.024	0	Superficial_Epithelial	chr11-37261689-37262919
0	0.471206	0.187	0.049	0	Superficial_Epithelial	chr16-23366514-23368070
0	0.470926	0.171	0.042	0	Superficial_Epithelial	chr21-45426200-45427662
0	0.470884	0.208	0.064	0	Superficial_Epithelial	chr15-28304722-28305906
0	0.470576	0.355	0.161	0	Superficial_Epithelial	chr9-33942548-33943812
0	0.47053	0.193	0.054	0	Superficial_Epithelial	chr13-27042234-27043155
0	0.470412	0.146	0.03	0	Superficial_Epithelial	chr8-41627121-41628124
0	0.47009	0.122	0.016	0	Superficial_Epithelial	chr2-33385856-33386701
0	0.47007	0.133	0.021	0	Superficial_Epithelial	chr12-44238497-44239091
0	0.470007	0.158	0.034	0	Superficial_Epithelial	chr5-31763436-31764755
0	0.469832	0.266	0.098	0	Superficial_Epithelial	chr2-10495931-10497610
0	0.469637	0.144	0.026	0	Superficial_Epithelial	chr3-39525682-39526984
0	0.469613	0.122	0.016	0	Superficial_Epithelial	chr16-8080921-8081735
0	0.4691	0.105	0.008	0	Superficial_Epithelial	chr10-15012090-15012574
0	0.469059	0.12	0.015	0	Superficial_Epithelial	chr4-9924845-9925248
0	0.469058	0.105	0.009	0	Superficial_Epithelial	chr8-16492849-16493129
0	0.46902	0.111	0.011	0	Superficial_Epithelial	chr1-41552333-41553129
0	0.468958	0.125	0.017	0	Superficial_Epithelial	chr14-11443588-11444404
0	0.468919	0.118	0.014	0	Superficial_Epithelial	chr13-5792419-5793553
0	0.468904	0.195	0.056	0	Superficial_Epithelial	chr25-11212150-11213333
0	0.468876	0.151	0.031	0	Superficial_Epithelial	chr1-8156609-8158050
0	0.468734	0.169	0.041	0	Superficial_Epithelial	chr19-25975647-25976499
0	0.46848	0.193	0.054	0	Superficial_Epithelial	chr5-23689248-23690698
0	0.468234	0.211	0.064	0	Superficial_Epithelial	chr6-41517937-41518783
0	0.467633	0.139	0.025	0	Superficial_Epithelial	chr8-48970535-48971098
0	0.467446	0.105	0.01	0	Superficial_Epithelial	chr1-58135959-58137371
0	0.467266	0.275	0.103	0	Superficial_Epithelial	chr11-40451081-40452180
0	0.46722	0.173	0.044	0	Superficial_Epithelial	chr13-13040281-13042073
0	0.467207	0.118	0.015	0	Superficial_Epithelial	chr12-22361172-22362586
0	0.466913	0.114	0.012	0	Superficial_Epithelial	chr7-19265235-19266063
0	0.466778	0.141	0.026	0	Superficial_Epithelial	chr3-14886306-14887074
0	0.466501	0.21	0.066	0	Superficial_Epithelial	chr3-27682107-27682639
0	0.466387	0.179	0.046	0	Superficial_Epithelial	chr10-2606324-2607233
0	0.466069	0.336	0.151	0	Superficial_Epithelial	chr6-1851187-1852188
0	0.465583	0.134	0.023	0	Superficial_Epithelial	chr12-27247793-27248679
0	0.465515	0.116	0.014	0	Superficial_Epithelial	chr3-4492354-4493936
0	0.465317	0.145	0.029	0	Superficial_Epithelial	chr17-22562012-22562496
0	0.46529	0.137	0.025	0	Superficial_Epithelial	chr3-41552235-41552978
0	0.464844	0.216	0.071	0	Superficial_Epithelial	chr13-41951965-41952665
0	0.464785	0.224	0.074	0	Superficial_Epithelial	chr13-41978531-41979623
0	0.464441	0.181	0.049	0	Superficial_Epithelial	chr8-50761560-50762108
0	0.464302	0.122	0.018	0	Superficial_Epithelial	chr16-22966152-22966836
0	0.464301	0.149	0.03	0	Superficial_Epithelial	chr18-1259695-1261704
0	0.4642	0.145	0.029	0	Superficial_Epithelial	chr16-16872759-16873395
0	0.463839	0.195	0.056	0	Superficial_Epithelial	chr1-51390328-51391123
0	0.463627	0.298	0.123	0	Superficial_Epithelial	chr9-25425275-25426470
0	0.463249	0.156	0.034	0	Superficial_Epithelial	chr16-19568042-19568700
0	0.463249	0.168	0.04	0	Superficial_Epithelial	chr3-39461748-39462532
0	0.463093	0.28	0.111	0	Superficial_Epithelial	chr15-2651875-2652879
0	0.463075	0.116	0.015	0	Superficial_Epithelial	chr14-50475154-50476164
0	0.462711	0.288	0.115	0	Superficial_Epithelial	chr14-28004111-28005366
0	0.462639	0.155	0.034	0	Superficial_Epithelial	chr24-35280436-35280907
0	0.462571	0.139	0.026	0	Superficial_Epithelial	chr24-21148221-21148855
0	0.462515	0.163	0.039	0	Superficial_Epithelial	chr14-16767846-16768537
0	0.462473	0.14	0.025	0	Superficial_Epithelial	chr19-4777305-4778147
0	0.462327	0.161	0.037	0	Superficial_Epithelial	chr2-33308990-33309737
0	0.46209	0.155	0.034	0	Superficial_Epithelial	chr21-45434535-45435370
0	0.46201	0.237	0.082	0	Superficial_Epithelial	chr8-10232511-10233521
0	0.461942	0.171	0.042	0	Superficial_Epithelial	chr10-22131240-22132837
0	0.461897	0.204	0.063	0	Superficial_Epithelial	chr16-32132581-32133605
0	0.461581	0.192	0.055	0	Superficial_Epithelial	chr2-49424817-49425522
0	0.460861	0.169	0.042	0	Superficial_Epithelial	chr17-30901069-30901957
0	0.460762	0.138	0.025	0	Superficial_Epithelial	chr2-10291355-10292406
0	0.460714	0.244	0.089	0	Superficial_Epithelial	chr16-28753853-28755159
0	0.460697	0.133	0.023	0	Superficial_Epithelial	chr23-3985201-3985623
0	0.460693	0.341	0.152	0	Superficial_Epithelial	chr1-46830539-46831538
0	0.460645	0.222	0.075	0	Superficial_Epithelial	chr1-41543319-41544522
0	0.460635	0.188	0.056	0	Superficial_Epithelial	chr13-4827033-4829164
0	0.460526	0.214	0.07	0	Superficial_Epithelial	chr6-35044213-35045558
0	0.460382	0.144	0.03	0	Superficial_Epithelial	chr13-33706483-33707324
0	0.459951	0.173	0.044	0	Superficial_Epithelial	chr6-11078959-11080264
0	0.459818	0.195	0.056	0	Superficial_Epithelial	chr4-2087663-2088389
0	0.459344	0.118	0.016	0	Superficial_Epithelial	chr14-7895448-7896309
0	0.459177	0.301	0.125	0	Superficial_Epithelial	chr24-9537044-9538393
0	0.459177	0.146	0.029	0	Superficial_Epithelial	chr9-9133614-9135147
0	0.459111	0.136	0.025	0	Superficial_Epithelial	chr9-41387405-41388074
0	0.458775	0.201	0.061	0	Superficial_Epithelial	chr10-15056766-15057371
0	0.458452	0.377	0.182	0	Superficial_Epithelial	chr15-28549920-28552569
0	0.45805	0.168	0.042	0	Superficial_Epithelial	chr4-4246576-4247491
0	0.457809	0.233	0.08	0	Superficial_Epithelial	chr3-57708415-57709620
0	0.45763	0.123	0.018	0	Superficial_Epithelial	chr3-62159663-62160297
0	0.457525	0.218	0.071	0	Superficial_Epithelial	chr16-39515165-39516221
0	0.457442	0.105	0.01	0	Superficial_Epithelial	chr25-21004698-21005587
0	0.457423	0.209	0.068	0	Superficial_Epithelial	chr7-34730901-34732507
0	0.457265	0.251	0.094	0	Superficial_Epithelial	chr13-22770793-22772134
0	0.457206	0.148	0.031	0	Superficial_Epithelial	chr7-920268-920916
0	0.457014	0.202	0.061	0	Superficial_Epithelial	chr13-25276385-25277240
0	0.456969	0.264	0.1	0	Superficial_Epithelial	chr11-6658374-6659521
0	0.456944	0.213	0.068	0	Superficial_Epithelial	chr18-37106299-37107291
0	0.456852	0.252	0.097	0	Superficial_Epithelial	chr19-10892997-10893964
0	0.456849	0.224	0.075	0	Superficial_Epithelial	chr13-13633462-13634901
0	0.456053	0.113	0.014	0	Superficial_Epithelial	chr5-30856184-30857014
0	0.456045	0.152	0.035	0	Superficial_Epithelial	chr13-49832198-49833044
0	0.456011	0.138	0.026	0	Superficial_Epithelial	chr2-6112214-6112893
0	0.455767	0.297	0.123	0	Superficial_Epithelial	chr25-31110098-31111865
0	0.455709	0.108	0.011	0	Superficial_Epithelial	chr1-47168054-47168825
0	0.455424	0.286	0.116	0	Superficial_Epithelial	chr7-19840074-19841317
0	0.455418	0.176	0.048	0	Superficial_Epithelial	chr3-27802149-27803327
0	0.455287	0.174	0.045	0	Superficial_Epithelial	chr21-45437825-45438772
0	0.455191	0.136	0.026	0	Superficial_Epithelial	chr3-532231-533484
0	0.45516	0.253	0.099	0	Superficial_Epithelial	chr8-20917111-20918661
0	0.454992	0.22	0.074	0	Superficial_Epithelial	chr12-25727595-25728972
0	0.454852	0.118	0.016	0	Superficial_Epithelial	chr17-50305392-50306355
0	0.454687	0.147	0.032	0	Superficial_Epithelial	chr19-6238650-6239378
0	0.454649	0.196	0.06	0	Superficial_Epithelial	chr9-39791993-39792895
0	0.454615	0.145	0.03	0	Superficial_Epithelial	chr5-29132674-29134398
0	0.454521	0.12	0.017	0	Superficial_Epithelial	chr23-13547935-13548785
0	0.454408	0.296	0.125	0	Superficial_Epithelial	chr8-8949852-8950802
0	0.454339	0.153	0.033	0	Superficial_Epithelial	chr11-30543894-30545179
0	0.454331	0.127	0.02	0	Superficial_Epithelial	chr6-58655850-58656784
0	0.454072	0.121	0.018	0	Superficial_Epithelial	chr6-7475278-7476000
0	0.453573	0.257	0.097	0	Superficial_Epithelial	chr17-2627104-2628213
0	0.453353	0.255	0.094	0	Superficial_Epithelial	chr8-14091062-14092173
0	0.452964	0.235	0.085	0	Superficial_Epithelial	chr5-22795939-22798001
0	0.452952	0.144	0.029	0	Superficial_Epithelial	chr1-11603608-11604767
0	0.452757	0.274	0.108	0	Superficial_Epithelial	chr14-1168979-1169850
0	0.452491	0.306	0.13	0	Superficial_Epithelial	chr1-85717-86804
0	0.452345	0.271	0.107	0	Superficial_Epithelial	chr19-48241115-48241847
0	0.452122	0.256	0.097	0	Superficial_Epithelial	chr11-30629268-30630823
0	0.4521	0.182	0.052	0	Superficial_Epithelial	chr8-53277765-53278953
0	0.452096	0.174	0.047	0	Superficial_Epithelial	chr5-15117463-15118237
0	0.452023	0.344	0.157	0	Superficial_Epithelial	chr16-16413276-16414559
0	0.451738	0.142	0.029	0	Superficial_Epithelial	chr12-5784773-5785347
0	0.451341	0.115	0.016	0	Superficial_Epithelial	chr2-11497215-11498012
0	0.451121	0.115	0.016	0	Superficial_Epithelial	chr6-9142119-9143127
0	0.450245	0.143	0.03	0	Superficial_Epithelial	chr20-35699078-35700650
0	0.450164	0.112	0.014	0	Superficial_Epithelial	chr21-22925505-22926238
0	0.450098	0.108	0.013	0	Superficial_Epithelial	chr18-5726552-5727496
0	0.449626	0.14	0.029	0	Superficial_Epithelial	chr11-231638-232071
0	0.449325	0.279	0.115	0	Superficial_Epithelial	chr17-27732074-27733319
0	0.449209	0.184	0.054	0	Superficial_Epithelial	chr4-4553858-4554348
0	0.44916	0.146	0.032	0	Superficial_Epithelial	chr8-50238595-50240600
0	0.449136	0.319	0.142	0	Superficial_Epithelial	chr21-32434995-32437279
0	0.449042	0.123	0.019	0	Superficial_Epithelial	chr11-44667306-44667966
0	0.448969	0.31	0.138	0	Superficial_Epithelial	chr23-26457399-26458740
0	0.448719	0.17	0.045	0	Superficial_Epithelial	chr15-18295282-18296106
0	0.448388	0.174	0.047	0	Superficial_Epithelial	chr12-838182-838666
0	0.448363	0.104	0.011	0	Superficial_Epithelial	chr3-19499998-19500706
0	0.448318	0.149	0.034	0	Superficial_Epithelial	chr18-35442474-35443805
0	0.44825	0.206	0.068	0	Superficial_Epithelial	chr7-33864505-33865485
0	0.448094	0.174	0.048	0	Superficial_Epithelial	chr9-18031857-18032920
0	0.44807	0.261	0.103	0	Superficial_Epithelial	chr19-48243417-48244296
0	0.447955	0.141	0.03	0	Superficial_Epithelial	chr6-40655014-40655424
0	0.447845	0.152	0.034	0	Superficial_Epithelial	chr18-539623-541236
0	0.447669	0.127	0.022	0	Superficial_Epithelial	chr5-41936988-41937856
0	0.447666	0.183	0.054	0	Superficial_Epithelial	chr7-16506957-16507641
0	0.447611	0.102	0.009	0	Superficial_Epithelial	chr18-5731985-5732675
0	0.447527	0.309	0.136	0	Superficial_Epithelial	chr4-16887667-16888365
0	0.447516	0.226	0.079	0	Superficial_Epithelial	chr22-29782273-29782960
0	0.447502	0.161	0.039	0	Superficial_Epithelial	chr14-21227763-21228705
0	0.447459	0.352	0.167	0	Superficial_Epithelial	chr1-18635505-18636797
0	0.447316	0.287	0.118	0	Superficial_Epithelial	chr17-32423371-32424584
0	0.447206	0.137	0.026	0	Superficial_Epithelial	chr7-983861-985074
0	0.446948	0.117	0.018	0	Superficial_Epithelial	chr20-26792777-26793243
0	0.446641	0.101	0.01	0	Superficial_Epithelial	chr11-14757460-14758490
0	0.44644	0.206	0.067	0	Superficial_Epithelial	chr12-8680984-8681900
0	0.446429	0.285	0.116	0	Superficial_Epithelial	chr20-46034522-46036227
0	0.446429	0.119	0.018	0	Superficial_Epithelial	chr2-9757192-9757676
0	0.446259	0.24	0.089	0	Superficial_Epithelial	chr24-31134136-31135191
0	0.445865	0.127	0.022	0	Superficial_Epithelial	chr23-34120942-34121388
0	0.445798	0.133	0.025	0	Superficial_Epithelial	chr5-52183966-52186291
0	0.445753	0.166	0.043	0	Superficial_Epithelial	chr12-46116553-46117422
0	0.445714	0.122	0.02	0	Superficial_Epithelial	chr3-39635916-39637111
0	0.445541	0.272	0.112	0	Superficial_Epithelial	chr7-56953287-56954345
0	0.445095	0.367	0.176	0	Superficial_Epithelial	chr6-23034171-23037746
0	0.445012	0.168	0.045	0	Superficial_Epithelial	chr3-18533249-18534130
0	0.444856	0.15	0.036	0	Superficial_Epithelial	chr13-33039965-33041492
0	0.444677	0.15	0.034	0	Superficial_Epithelial	chr18-7590943-7592491
0	0.444675	0.264	0.107	0	Superficial_Epithelial	chr20-36470232-36471113
0	0.444637	0.109	0.014	0	Superficial_Epithelial	chr5-62933233-62933898
0	0.444624	0.144	0.031	0	Superficial_Epithelial	chr23-4529219-4530383
0	0.444438	0.268	0.109	0	Superficial_Epithelial	chr21-393766-394925
0	0.444406	0.111	0.014	0	Superficial_Epithelial	chr11-11573241-11573970
0	0.443297	0.13	0.024	0	Superficial_Epithelial	chr14-17586068-17586757
0	0.443289	0.181	0.054	0	Superficial_Epithelial	chr11-10885882-10886600
0	0.443086	0.194	0.062	0	Superficial_Epithelial	chr1-26632143-26632860
0	0.443051	0.214	0.074	0	Superficial_Epithelial	chr12-4033376-4034802
0	0.442851	0.193	0.062	0	Superficial_Epithelial	chr14-33320613-33322146
0	0.442779	0.271	0.115	0	Superficial_Epithelial	chr19-2541462-2542108
0	0.442163	0.128	0.023	0	Superficial_Epithelial	chr22-5801139-5801711
0	0.442041	0.207	0.069	0	Superficial_Epithelial	chr2-44346114-44347453
0	0.441971	0.17	0.048	0	Superficial_Epithelial	chr11-40809747-40810772
0	0.441934	0.15	0.035	0	Superficial_Epithelial	chr12-43696120-43696911
0	0.441828	0.141	0.03	0	Superficial_Epithelial	chr6-39330593-39331065
0	0.441523	0.183	0.055	0	Superficial_Epithelial	chr8-14083317-14084284
0	0.441516	0.358	0.169	0	Superficial_Epithelial	chr8-50231668-50232811
0	0.441414	0.231	0.084	0	Superficial_Epithelial	chr19-24510414-24511939
0	0.441285	0.234	0.086	0	Superficial_Epithelial	chr6-48409967-48411541
0	0.440905	0.253	0.099	0	Superficial_Epithelial	chr10-26665834-26667814
0	0.440866	0.164	0.043	0	Superficial_Epithelial	chr16-12228138-12229045
0	0.440853	0.146	0.032	0	Superficial_Epithelial	chr10-39052056-39053133
0	0.44081	0.148	0.034	0	Superficial_Epithelial	chr7-26578047-26580823
0	0.440729	0.124	0.021	0	Superficial_Epithelial	chr17-50668652-50669911
0	0.440637	0.176	0.051	0	Superficial_Epithelial	chr19-22495901-22496580
0	0.440483	0.139	0.029	0	Superficial_Epithelial	chr12-35639759-35640315
0	0.440471	0.193	0.06	0	Superficial_Epithelial	chr11-25004077-25005880
0	0.44033	0.23	0.082	0	Superficial_Epithelial	chr25-30229638-30231541
0	0.44008	0.282	0.119	0	Superficial_Epithelial	chr2-7575987-7577828
0	0.439993	0.2	0.065	0	Superficial_Epithelial	chr18-50602086-50603012
0	0.439741	0.274	0.116	0	Superficial_Epithelial	chr5-24340534-24341119
0	0.439645	0.251	0.096	0	Superficial_Epithelial	chr22-30676945-30678754
0	0.439642	0.13	0.025	0	Superficial_Epithelial	chr24-21892197-21892685
0	0.439379	0.157	0.039	0	Superficial_Epithelial	chr16-45738639-45740200
0	0.439353	0.179	0.052	0	Superficial_Epithelial	chr14-22314058-22314958
0	0.439329	0.205	0.069	0	Superficial_Epithelial	chr5-58805581-58807730
0	0.439327	0.131	0.026	0	Superficial_Epithelial	chr11-34316213-34316722
0	0.439282	0.167	0.046	0	Superficial_Epithelial	chr10-28796221-28797453
0	0.439259	0.27	0.109	0	Superficial_Epithelial	chr11-18355423-18357455
0	0.439178	0.105	0.012	0	Superficial_Epithelial	chr22-27684999-27685715
0	0.439117	0.114	0.017	0	Superficial_Epithelial	chr2-24529358-24529786
0	0.439087	0.115	0.017	0	Superficial_Epithelial	chr13-25272022-25272763
0	0.439051	0.149	0.035	0	Superficial_Epithelial	chr24-41784819-41785799
0	0.438888	0.14	0.031	0	Superficial_Epithelial	chr24-35666978-35667673
0	0.438828	0.396	0.204	0	Superficial_Epithelial	chr2-59389123-59391170
0	0.438718	0.27	0.114	0	Superficial_Epithelial	chr8-30972319-30972942
0	0.438663	0.242	0.091	0	Superficial_Epithelial	chr3-37066518-37067859
0	0.438497	0.278	0.116	0	Superficial_Epithelial	chr6-33547672-33548775
0	0.438421	0.16	0.042	0	Superficial_Epithelial	chr1-26645201-26646381
0	0.43831	0.167	0.044	0	Superficial_Epithelial	chr7-934896-936456
0	0.438263	0.1	0.011	0	Superficial_Epithelial	chr3-8092395-8093049
0	0.438226	0.246	0.099	0	Superficial_Epithelial	chr10-17395226-17395986
0	0.438002	0.194	0.061	0	Superficial_Epithelial	chr24-31872185-31873053
0	0.437934	0.202	0.066	0	Superficial_Epithelial	chr1-52421133-52421794
0	0.437894	0.145	0.033	0	Superficial_Epithelial	chr22-27162801-27164078
0	0.437658	0.15	0.037	0	Superficial_Epithelial	chr13-49438614-49439280
0	0.437621	0.178	0.055	0	Superficial_Epithelial	chr14-15129863-15131871
0	0.437355	0.377	0.185	0	Superficial_Epithelial	chr20-28388055-28389474
0	0.437337	0.244	0.094	0	Superficial_Epithelial	chr7-38373481-38375110
0	0.43722	0.252	0.102	0	Superficial_Epithelial	chr5-44935596-44937216
0	0.436864	0.253	0.099	0	Superficial_Epithelial	chr22-6147391-6148784
0	0.436676	0.189	0.06	0	Superficial_Epithelial	chr6-52681964-52682876
0	0.436498	0.154	0.039	0	Superficial_Epithelial	chr3-39678814-39679578
0	0.436129	0.212	0.072	0	Superficial_Epithelial	chr8-16755091-16756843
0	0.436075	0.134	0.027	0	Superficial_Epithelial	chr16-55188430-55189517
0	0.435963	0.129	0.025	0	Superficial_Epithelial	chr12-44259870-44261023
0	0.435933	0.395	0.198	0	Superficial_Epithelial	chr9-46458032-46460733
0	0.435642	0.106	0.013	0	Superficial_Epithelial	chr20-21382904-21383766
0	0.435388	0.105	0.013	0	Superficial_Epithelial	chr19-29645787-29646515
0	0.435327	0.324	0.153	0	Superficial_Epithelial	chr18-34791709-34792594
0	0.435232	0.121	0.021	0	Superficial_Epithelial	chr19-9676174-9676899
0	0.435139	0.209	0.074	0	Superficial_Epithelial	chr22-10800795-10802077
0	0.434829	0.274	0.119	0	Superficial_Epithelial	chr23-10290489-10291729
0	0.434784	0.137	0.029	0	Superficial_Epithelial	chr3-27653312-27654128
0	0.434744	0.115	0.017	0	Superficial_Epithelial	chr11-10471768-10472846
0	0.434725	0.268	0.111	0	Superficial_Epithelial	chr8-43510758-43511749
0	0.434591	0.321	0.147	0	Superficial_Epithelial	chr3-49587654-49589347
0	0.434483	0.288	0.125	0	Superficial_Epithelial	chr12-37438582-37439363
0	0.43442	0.171	0.049	0	Superficial_Epithelial	chr10-17427444-17429328
0	0.434033	0.29	0.129	0	Superficial_Epithelial	chr17-28034389-28035896
0	0.433934	0.233	0.088	0	Superficial_Epithelial	chr15-25625090-25625970
0	0.433554	0.318	0.144	0	Superficial_Epithelial	chr23-29556771-29558098
0	0.433355	0.251	0.1	0	Superficial_Epithelial	chr12-45260728-45261768
0	0.433321	0.127	0.023	0	Superficial_Epithelial	chr23-41634259-41635701
0	0.43332	0.15	0.038	0	Superficial_Epithelial	chr2-33881630-33882588
0	0.433201	0.235	0.088	0	Superficial_Epithelial	chr1-59343251-59344700
0	0.433095	0.126	0.024	0	Superficial_Epithelial	chr1-19407332-19407925
0	0.432979	0.148	0.034	0	Superficial_Epithelial	chr20-35739843-35740612
0	0.432486	0.188	0.061	0	Superficial_Epithelial	chr2-349584-350373
0	0.432432	0.384	0.21	0	Superficial_Epithelial	chr1-8646567-8650289
0	0.432179	0.14	0.031	0	Superficial_Epithelial	chr22-728970-730849
0	0.431984	0.193	0.064	0	Superficial_Epithelial	chr16-20836284-20837647
0	0.4318	0.269	0.112	0	Superficial_Epithelial	chr1-44955987-44956880
0	0.431188	0.272	0.114	0	Superficial_Epithelial	chr5-69490259-69492154
0	0.430994	0.204	0.071	0	Superficial_Epithelial	chr5-54929005-54930309
0	0.430975	0.166	0.046	0	Superficial_Epithelial	chr20-21297091-21297967
0	0.430923	0.124	0.023	0	Superficial_Epithelial	chr6-43262090-43262967
0	0.430824	0.196	0.065	0	Superficial_Epithelial	chr5-43781562-43782393
0	0.430631	0.247	0.099	0	Superficial_Epithelial	chr10-3204553-3205249
0	0.430452	0.261	0.107	0	Superficial_Epithelial	chr22-25837249-25838446
0	0.430372	0.243	0.094	0	Superficial_Epithelial	chr23-26775323-26776009
0	0.430299	0.119	0.02	0	Superficial_Epithelial	chr21-15283475-15284380
0	0.430249	0.104	0.012	0	Superficial_Epithelial	chr16-19564832-19565703
0	0.429931	0.131	0.026	0	Superficial_Epithelial	chr24-40514898-40515574
0	0.429523	0.105	0.013	0	Superficial_Epithelial	chr25-34846514-34846988
0	0.429301	0.113	0.018	0	Superficial_Epithelial	chr22-671402-671748
0	0.429003	0.117	0.02	0	Superficial_Epithelial	chr3-39621866-39622421
0	0.428973	0.332	0.16	0	Superficial_Epithelial	chr24-14212197-14213232
0	0.42881	0.174	0.051	0	Superficial_Epithelial	chr24-41891089-41891852
0	0.428719	0.116	0.019	0	Superficial_Epithelial	chr24-20274429-20275149
0	0.428621	0.128	0.026	0	Superficial_Epithelial	chr1-53221964-53222962
0	0.428613	0.173	0.051	0	Superficial_Epithelial	chr13-24822854-24823804
0	0.428452	0.201	0.067	0	Superficial_Epithelial	chr5-30883385-30884554
0	0.428251	0.346	0.166	0	Superficial_Epithelial	chr13-21666885-21667793
0	0.428116	0.299	0.135	0	Superficial_Epithelial	chr22-22024544-22025501
0	0.428037	0.21	0.074	0	Superficial_Epithelial	chr5-62021763-62022946
0	0.428006	0.195	0.066	0	Superficial_Epithelial	chr16-11004084-11005666
0	0.427969	0.287	0.126	0	Superficial_Epithelial	chr10-10750619-10751597
0	0.427882	0.102	0.012	0	Superficial_Epithelial	chr23-33417306-33418096
0	0.427793	0.115	0.019	0	Superficial_Epithelial	chr19-35090467-35091513
0	0.42779	0.118	0.02	0	Superficial_Epithelial	chr3-3950948-3951946
0	0.427788	0.106	0.015	0	Superficial_Epithelial	chr8-17460716-17461261
0	0.427658	0.107	0.015	0	Superficial_Epithelial	chr11-6472279-6473273
0	0.427543	0.207	0.072	0	Superficial_Epithelial	chr10-44489744-44491128
0	0.427227	0.325	0.152	0	Superficial_Epithelial	chr24-21874319-21875468
0	0.427206	0.107	0.016	0	Superficial_Epithelial	chr7-2042233-2043057
0	0.427156	0.207	0.072	0	Superficial_Epithelial	chr11-34528575-34529423
0	0.427068	0.132	0.028	0	Superficial_Epithelial	chr5-30874853-30876001
0	0.426883	0.161	0.044	0	Superficial_Epithelial	chr2-41841739-41842573
0	0.426849	0.108	0.015	0	Superficial_Epithelial	chr1-25340084-25340661
0	0.426409	0.179	0.056	0	Superficial_Epithelial	chr23-29097943-29099758
0	0.426404	0.182	0.057	0	Superficial_Epithelial	chr5-4082553-4083812
0	0.426312	0.235	0.092	0	Superficial_Epithelial	chr2-43770662-43771606
0	0.426137	0.201	0.068	0	Superficial_Epithelial	chr7-2174600-2175539
0	0.426112	0.11	0.017	0	Superficial_Epithelial	chr13-23655368-23656945
0	0.42609	0.259	0.109	0	Superficial_Epithelial	chr5-31781958-31782961
0	0.426086	0.198	0.068	0	Superficial_Epithelial	chr1-31916750-31918505
0	0.425794	0.233	0.088	0	Superficial_Epithelial	chr1-45183203-45184536
0	0.425739	0.15	0.038	0	Superficial_Epithelial	chr5-65026149-65027135
0	0.42565	0.211	0.075	0	Superficial_Epithelial	chr16-41091597-41093259
0	0.425598	0.228	0.087	0	Superficial_Epithelial	chr3-27650396-27651279
0	0.425271	0.238	0.095	0	Superficial_Epithelial	chr11-18910049-18911245
0	0.425136	0.284	0.127	0	Superficial_Epithelial	chr4-11501121-11502591
0	0.425118	0.362	0.188	0	Superficial_Epithelial	chr8-17018420-17020339
0	0.425111	0.22	0.081	0	Superficial_Epithelial	chr7-60340621-60341655
0	0.425038	0.111	0.017	0	Superficial_Epithelial	chr3-31938370-31939041
0	0.425007	0.2	0.068	0	Superficial_Epithelial	chr6-7483825-7485001
0	0.424958	0.369	0.189	0	Superficial_Epithelial	chr19-19460315-19461672
0	0.42492	0.167	0.048	0	Superficial_Epithelial	chr5-30918901-30920095
0	0.424893	0.109	0.017	0	Superficial_Epithelial	chr10-36785783-36786696
0	0.424778	0.199	0.068	0	Superficial_Epithelial	chr17-5623530-5624369
0	0.424708	0.106	0.014	0	Superficial_Epithelial	chr3-5118801-5120070
0	0.424687	0.186	0.059	0	Superficial_Epithelial	chr12-28786409-28787576
0	0.424163	0.109	0.016	0	Superficial_Epithelial	chr2-43237173-43237591
0	0.424128	0.282	0.13	0	Superficial_Epithelial	chr3-54919194-54920286
0	0.42411	0.263	0.111	0	Superficial_Epithelial	chr16-22309419-22310538
0	0.423893	0.157	0.043	0	Superficial_Epithelial	chr23-32180547-32181780
0	0.423819	0.286	0.125	0	Superficial_Epithelial	chr3-16536540-16537599
0	0.423734	0.219	0.082	0	Superficial_Epithelial	chr11-44670319-44670799
0	0.423729	0.132	0.03	0	Superficial_Epithelial	chr18-47418757-47419740
0	0.423425	0.188	0.064	0	Superficial_Epithelial	chr9-51571444-51572451
0	0.42342	0.175	0.055	0	Superficial_Epithelial	chr18-49950063-49950803
0	0.423085	0.257	0.106	0	Superficial_Epithelial	chr6-48383360-48384966
0	0.423029	0.15	0.039	0	Superficial_Epithelial	chr13-25826222-25827036
0	0.422924	0.151	0.04	0	Superficial_Epithelial	chr1-9934171-9935469
0	0.42275	0.141	0.034	0	Superficial_Epithelial	chr3-27637579-27639761
0	0.422592	0.102	0.013	0	Superficial_Epithelial	chr12-44224168-44224922
0	0.422537	0.134	0.03	0	Superficial_Epithelial	chr21-22953201-22954921
0	0.422478	0.212	0.078	0	Superficial_Epithelial	chr19-24516080-24516928
0	0.42247	0.147	0.039	0	Superficial_Epithelial	chr8-38316414-38317020
0	0.422062	0.143	0.035	0	Superficial_Epithelial	chr15-516011-516798
0	0.421875	0.104	0.015	0	Superficial_Epithelial	chr21-41348109-41348741
0	0.421758	0.241	0.098	0	Superficial_Epithelial	chr21-2814566-2815076
0	0.421364	0.161	0.046	0	Superficial_Epithelial	chr25-11133052-11133900
0	0.421261	0.164	0.048	0	Superficial_Epithelial	chr21-40465024-40466165
0	0.421179	0.176	0.054	0	Superficial_Epithelial	chr6-8226640-8227238
0	0.42114	0.159	0.045	0	Superficial_Epithelial	chr17-26909471-26910103
0	0.421107	0.148	0.038	0	Superficial_Epithelial	chr1-40685649-40686899
0	0.420752	0.438	0.241	0	Superficial_Epithelial	chr9-21951563-21952743
0	0.420614	0.373	0.192	0	Superficial_Epithelial	chr16-29161096-29163204
0	0.420595	0.195	0.068	0	Superficial_Epithelial	chr13-7466616-7468547
0	0.420564	0.276	0.118	0	Superficial_Epithelial	chr5-43439675-43440940
0	0.420516	0.168	0.049	0	Superficial_Epithelial	chr12-17817083-17817971
0	0.420448	0.372	0.192	0	Superficial_Epithelial	chr25-23563317-23564691
0	0.420213	0.152	0.041	0	Superficial_Epithelial	chr7-34651401-34652748
0	0.420207	0.276	0.12	0	Superficial_Epithelial	chr20-8110272-8111198
0	0.420114	0.101	0.013	0	Superficial_Epithelial	chr13-21666021-21666518
0	0.420081	0.139	0.032	0	Superficial_Epithelial	chr5-30735527-30736551
0	0.419663	0.324	0.158	0	Superficial_Epithelial	chr6-4271597-4272613
0	0.419551	0.14	0.034	0	Superficial_Epithelial	chr11-3484895-3485581
0	0.419444	0.106	0.016	0	Superficial_Epithelial	chr13-39198564-39199605
0	0.419305	0.14	0.033	0	Superficial_Epithelial	chr1-16570933-16571824
0	0.419163	0.14	0.034	0	Superficial_Epithelial	chr5-56367305-56368384
0	0.418944	0.274	0.123	0	Superficial_Epithelial	chr21-17057685-17059265
0	0.418911	0.276	0.12	0	Superficial_Epithelial	chr3-53346353-53347194
0	0.418816	0.19	0.064	0	Superficial_Epithelial	chr18-18934390-18935044
0	0.418764	0.106	0.016	0	Superficial_Epithelial	chr2-59359844-59361331
0	0.418381	0.156	0.043	0	Superficial_Epithelial	chr8-36931007-36932327
0	0.418371	0.113	0.019	0	Superficial_Epithelial	chr22-684782-685053
0	0.41837	0.171	0.053	0	Superficial_Epithelial	chr22-30354396-30355088
0	0.418351	0.239	0.095	0	Superficial_Epithelial	chr7-49668096-49668938
0	0.418244	0.47	0.266	0	Superficial_Epithelial	chr3-36491650-36493532
0	0.418137	0.182	0.061	0	Superficial_Epithelial	chr25-18515275-18516835
0	0.417718	0.188	0.064	0	Superficial_Epithelial	chr3-27718552-27719831
0	0.417706	0.104	0.015	0	Superficial_Epithelial	chr3-18741351-18742191
0	0.417157	0.231	0.088	0	Superficial_Epithelial	chr8-2478501-2479620
0	0.416913	0.126	0.027	0	Superficial_Epithelial	chr10-36782067-36782724
0	0.416667	0.187	0.06	0	Superficial_Epithelial	chr12-15208066-15210124
0	0.416494	0.273	0.118	0	Superficial_Epithelial	chr16-52365320-52366456
0	0.41616	0.147	0.038	0	Superficial_Epithelial	chr19-19471488-19472101
0	0.416009	0.147	0.04	0	Superficial_Epithelial	chr21-3275675-3276510
0	0.415846	0.246	0.099	0	Superficial_Epithelial	chr25-34838297-34839506
0	0.415811	0.134	0.03	0	Superficial_Epithelial	chr1-18654733-18655070
0	0.415783	0.308	0.149	0	Superficial_Epithelial	chr23-24698041-24699617
0	0.415524	0.148	0.041	0	Superficial_Epithelial	chr5-27460011-27461247
0	0.415423	0.252	0.108	0	Superficial_Epithelial	chr3-60702915-60703975
0	0.415354	0.106	0.016	0	Superficial_Epithelial	chr12-2592793-2593967
0	0.415276	0.172	0.056	0	Superficial_Epithelial	chr9-23053453-23053999
0	0.415224	0.241	0.095	0	Superficial_Epithelial	chr14-33270956-33272041
0	0.415029	0.219	0.083	0	Superficial_Epithelial	chr4-25775439-25775950
0	0.414836	0.216	0.083	0	Superficial_Epithelial	chr6-179071-180072
0	0.414708	0.154	0.044	0	Superficial_Epithelial	chr14-21100522-21101364
0	0.414705	0.112	0.019	0	Superficial_Epithelial	chr12-46056966-46057578
0	0.414684	0.283	0.13	0	Superficial_Epithelial	chr4-18570546-18571909
0	0.414561	0.38	0.202	0	Superficial_Epithelial	chr13-5208701-5211067
0	0.414283	0.176	0.054	0	Superficial_Epithelial	chr21-38852671-38854782
0	0.414104	0.126	0.028	0	Superficial_Epithelial	chr18-31015018-31016436
0	0.413952	0.2	0.072	0	Superficial_Epithelial	chr7-32597501-32599976
0	0.413728	0.19	0.065	0	Superficial_Epithelial	chr14-21224357-21225655
0	0.413712	0.125	0.026	0	Superficial_Epithelial	chr18-13321958-13322830
0	0.413492	0.102	0.015	0	Superficial_Epithelial	chr23-27187584-27188564
0	0.413379	0.196	0.07	0	Superficial_Epithelial	chr13-52123220-52123865
0	0.413339	0.15	0.041	0	Superficial_Epithelial	chr6-38622422-38623051
0	0.413014	0.264	0.117	0	Superficial_Epithelial	chr11-6496152-6497588
0	0.412801	0.298	0.136	0	Superficial_Epithelial	chr6-47761221-47762358
0	0.412754	0.166	0.051	0	Superficial_Epithelial	chr19-48226463-48226970
0	0.412623	0.179	0.06	0	Superficial_Epithelial	chr8-32374281-32375517
0	0.412596	0.301	0.143	0	Superficial_Epithelial	chr11-10936407-10937544
0	0.412488	0.253	0.106	0	Superficial_Epithelial	chr1-45187744-45188617
0	0.412	0.111	0.019	0	Superficial_Epithelial	chr10-17952249-17953043
0	0.411663	0.133	0.031	0	Superficial_Epithelial	chr21-41345737-41346777
0	0.411646	0.15	0.04	0	Superficial_Epithelial	chr23-26141958-26143400
0	0.411601	0.15	0.041	0	Superficial_Epithelial	chr7-39682407-39683497
0	0.411564	0.234	0.095	0	Superficial_Epithelial	chr2-55520119-55520792
0	0.411408	0.166	0.049	0	Superficial_Epithelial	chr6-36391105-36392195
0	0.411277	0.241	0.099	0	Superficial_Epithelial	chr6-50397176-50398187
0	0.411143	0.172	0.054	0	Superficial_Epithelial	chr6-52448457-52450047
0	0.411085	0.184	0.063	0	Superficial_Epithelial	chr5-42052967-42055040
0	0.410985	0.122	0.024	0	Superficial_Epithelial	chr24-3331555-3332259
0	0.410527	0.149	0.042	0	Superficial_Epithelial	chr14-44911965-44913745
0	0.410322	0.143	0.039	0	Superficial_Epithelial	chr5-41983964-41984537
0	0.409995	0.129	0.03	0	Superficial_Epithelial	chr23-1207390-1207994
0	0.409915	0.331	0.163	0	Superficial_Epithelial	chr2-36896018-36897002
0	0.409885	0.102	0.015	0	Superficial_Epithelial	chr23-33345397-33346471
0	0.409628	0.248	0.105	0	Superficial_Epithelial	chr13-33275569-33276601
0	0.409615	0.114	0.02	0	Superficial_Epithelial	chr8-20166343-20167028
0	0.409594	0.208	0.077	0	Superficial_Epithelial	chr16-29099696-29100517
0	0.409557	0.307	0.145	0	Superficial_Epithelial	chr5-57704027-57705526
0	0.409355	0.202	0.073	0	Superficial_Epithelial	chr6-48325468-48326278
0	0.409346	0.248	0.108	0	Superficial_Epithelial	chr25-18524971-18526836
0	0.409226	0.215	0.085	0	Superficial_Epithelial	chr7-21715394-21716386
0	0.409111	0.214	0.081	0	Superficial_Epithelial	chr8-20245463-20246178
0	0.409086	0.22	0.085	0	Superficial_Epithelial	chr15-25423696-25424525
0	0.408973	0.187	0.064	0	Superficial_Epithelial	chr17-20885438-20886298
0	0.408937	0.152	0.042	0	Superficial_Epithelial	chr19-335076-335778
0	0.408684	0.146	0.04	0	Superficial_Epithelial	chr21-1075221-1076234
0	0.408368	0.124	0.028	0	Superficial_Epithelial	chr4-16873862-16874733
0	0.408367	0.223	0.086	0	Superficial_Epithelial	chr10-39054722-39056134
0	0.408208	0.108	0.018	0	Superficial_Epithelial	chr10-27152362-27153446
0	0.408129	0.209	0.078	0	Superficial_Epithelial	chr7-59365086-59366388
0	0.408067	0.269	0.12	0	Superficial_Epithelial	chr18-47386528-47387521
0	0.407864	0.132	0.032	0	Superficial_Epithelial	chr7-20053599-20055008
0	0.407823	0.182	0.065	0	Superficial_Epithelial	chr1-55743245-55745589
0	0.407625	0.229	0.092	0	Superficial_Epithelial	chr16-30717304-30718763
0	0.407545	0.288	0.134	0	Superficial_Epithelial	chr4-18923155-18923985
0	0.407394	0.153	0.044	0	Superficial_Epithelial	chr21-25695239-25696976
0	0.406804	0.187	0.066	0	Superficial_Epithelial	chr6-2018607-2020113
0	0.406748	0.184	0.064	0	Superficial_Epithelial	chr7-18113825-18114692
0	0.40673	0.169	0.052	0	Superficial_Epithelial	chr3-18506282-18507477
0	0.406674	0.269	0.122	0	Superficial_Epithelial	chr20-33701699-33702971
0	0.406672	0.201	0.074	0	Superficial_Epithelial	chr5-23680313-23680861
0	0.406511	0.116	0.023	0	Superficial_Epithelial	chr2-42462017-42462499
0	0.406209	0.209	0.077	0	Superficial_Epithelial	chr4-13503172-13504361
0	0.406185	0.132	0.033	0	Superficial_Epithelial	chr23-9213781-9214686
0	0.405947	0.233	0.095	0	Superficial_Epithelial	chr17-26853162-26854724
0	0.405692	0.139	0.037	0	Superficial_Epithelial	chr12-48486891-48487608
0	0.405582	0.147	0.04	0	Superficial_Epithelial	chr21-15293160-15295897
0	0.405465	0.372	0.196	0	Superficial_Epithelial	chr17-45836290-45837303
0	0.405429	0.117	0.023	0	Superficial_Epithelial	chr2-49466686-49467351
0	0.405367	0.175	0.058	0	Superficial_Epithelial	chr24-21149815-21150210
0	0.405271	0.142	0.038	0	Superficial_Epithelial	chr16-10640782-10641737
0	0.405142	0.107	0.019	0	Superficial_Epithelial	chr1-58156785-58158459
0	0.404945	0.1	0.015	0	Superficial_Epithelial	chr2-38721440-38722369
0	0.404913	0.2	0.073	0	Superficial_Epithelial	chr17-24456252-24457318
0	0.404749	0.143	0.037	0	Superficial_Epithelial	chr4-847004-848045
0	0.404552	0.141	0.036	0	Superficial_Epithelial	chr7-21641811-21643051
0	0.404113	0.116	0.023	0	Superficial_Epithelial	chr16-45743959-45744806
0	0.403944	0.104	0.018	0	Superficial_Epithelial	chr3-56776388-56777521
0	0.403595	0.311	0.151	0	Superficial_Epithelial	chr13-33621157-33622375
0	0.403252	0.177	0.059	0	Superficial_Epithelial	chr16-27234690-27236202
0	0.403143	0.109	0.019	0	Superficial_Epithelial	chr13-23660615-23661129
0	0.402968	0.328	0.169	0	Superficial_Epithelial	chr9-8448374-8449525
0	0.402902	0.164	0.052	0	Superficial_Epithelial	chr24-31305938-31306802
0	0.402771	0.101	0.015	0	Superficial_Epithelial	chr3-42108749-42109328
0	0.402732	0.214	0.081	0	Superficial_Epithelial	chr14-37652284-37653486
0	0.402613	0.279	0.128	0	Superficial_Epithelial	chr24-20370029-20370904
0	0.402309	0.336	0.176	0	Superficial_Epithelial	chr23-4051090-4052846
0	0.402186	0.102	0.016	0	Superficial_Epithelial	chr16-29657974-29658834
0	0.402029	0.172	0.055	0	Superficial_Epithelial	chr19-48222842-48224053
0	0.401774	0.265	0.117	0	Superficial_Epithelial	chr1-53901100-53902054
0	0.401735	0.231	0.096	0	Superficial_Epithelial	chr17-24557266-24558366
0	0.401696	0.366	0.194	0	Superficial_Epithelial	chr22-25588371-25590596
0	0.401247	0.22	0.087	0	Superficial_Epithelial	chr1-59517344-59518104
0	0.401088	0.193	0.071	0	Superficial_Epithelial	chr8-16494851-16496396
0	0.400902	0.136	0.036	0	Superficial_Epithelial	chr16-5384868-5385963
0	0.400886	0.173	0.057	0	Superficial_Epithelial	chr11-37821057-37821812
0	0.400751	0.207	0.078	0	Superficial_Epithelial	chr5-23908885-23910668
0	0.400715	0.312	0.154	0	Superficial_Epithelial	chr14-32704048-32705230
0	0.400593	0.203	0.075	0	Superficial_Epithelial	chr5-55560603-55561649
0	0.400534	0.188	0.066	0	Superficial_Epithelial	chr21-11253157-11254706
0	0.400488	0.225	0.092	0	Superficial_Epithelial	chr19-1721108-1722224
0	0.4004	0.234	0.098	0	Superficial_Epithelial	chr4-14612366-14613773
0	0.400344	0.13	0.032	0	Superficial_Epithelial	chr13-12456058-12457443
0	0.400268	0.261	0.119	0	Superficial_Epithelial	chr23-22787794-22789097
0	0.400104	0.104	0.017	0	Superficial_Epithelial	chr23-12462875-12463897
0	0.400095	0.198	0.073	0	Superficial_Epithelial	chr6-18109814-18110851
0	0.400085	0.143	0.038	0	Superficial_Epithelial	chr3-39472717-39473556
0	0.399969	0.261	0.118	0	Superficial_Epithelial	chr13-45145431-45146861
0	0.399577	0.222	0.09	0	Superficial_Epithelial	chr22-12003482-12004531
0	0.399531	0.101	0.015	0	Superficial_Epithelial	chr22-30670830-30672469
0	0.399258	0.14	0.038	0	Superficial_Epithelial	chr1-41559261-41560481
0	0.399234	0.147	0.043	0	Superficial_Epithelial	chr13-12447491-12448347
0	0.399027	0.24	0.103	0	Superficial_Epithelial	chr17-33743208-33744408
0	0.399009	0.175	0.059	0	Superficial_Epithelial	chr15-2634071-2634710
0	0.398865	0.29	0.142	0	Superficial_Epithelial	chr16-7434986-7435979
0	0.398825	0.116	0.025	0	Superficial_Epithelial	chr19-3367908-3368618
0	0.398691	0.277	0.129	0	Superficial_Epithelial	chr18-15912697-15914133
0	0.398659	0.183	0.065	0	Superficial_Epithelial	chr9-26258107-26259481
0	0.398597	0.221	0.087	0	Superficial_Epithelial	chr4-71989256-71990131
0	0.398525	0.307	0.149	0	Superficial_Epithelial	chr21-30808620-30809902
0	0.398469	0.183	0.064	0	Superficial_Epithelial	chr9-41695986-41697042
0	0.398461	0.163	0.052	0	Superficial_Epithelial	chr13-27040326-27041185
0	0.398441	0.332	0.169	0	Superficial_Epithelial	chr7-17723049-17724105
0	0.39837	0.24	0.103	0	Superficial_Epithelial	chr7-52387769-52389638
0	0.442471	0.271	0.084	0	Intermediate_Epithelial	chr11-35080802-35083282
0	0.40922	0.325	0.132	0	Intermediate_Epithelial	chr15-2656857-2657909
0	0.353087	0.317	0.156	0	Intermediate_Epithelial	chr7-18593407-18594810
0	0.353018	0.19	0.063	0	Intermediate_Epithelial	chr3-53661029-53662778
0	0.336423	0.214	0.086	0	Intermediate_Epithelial	chr10-44314220-44315424
0	0.331943	0.322	0.169	0	Intermediate_Epithelial	chr25-28408965-28410120
0	0.330872	0.167	0.058	0	Intermediate_Epithelial	chr23-46201460-46202698
0	0.330424	0.162	0.055	0	Intermediate_Epithelial	chr25-25606671-25607621
0	0.324579	0.174	0.062	0	Intermediate_Epithelial	chr20-32758783-32761046
0	0.32169	0.25	0.117	0	Intermediate_Epithelial	chr18-26000747-26002024
0	0.320464	0.203	0.081	0	Intermediate_Epithelial	chr19-8392333-8393770
0	0.320369	0.27	0.135	0	Intermediate_Epithelial	chr12-35998662-35999530
0	0.318055	0.291	0.149	0	Intermediate_Epithelial	chr20-54826002-54827428
0	0.311057	0.218	0.1	0	Intermediate_Epithelial	chr4-11898413-11899373
0	0.308695	0.2	0.084	0	Intermediate_Epithelial	chr23-5981028-5981809
0	0.30857	0.367	0.212	0	Intermediate_Epithelial	chr3-53655204-53656437
0	0.307638	0.154	0.054	0	Intermediate_Epithelial	chr7-55148228-55149415
0	0.306719	0.161	0.059	0	Intermediate_Epithelial	chr18-43105991-43107138
0	0.305929	0.245	0.118	0	Intermediate_Epithelial	chr20-15692963-15694264
0	0.305732	0.14	0.048	0	Intermediate_Epithelial	chr6-55616030-55616904
0	0.304174	0.157	0.059	0	Intermediate_Epithelial	chr3-55801490-55802758
0	0.302099	0.137	0.047	0	Intermediate_Epithelial	chr23-40221856-40223009
0	0.302092	0.246	0.122	0	Intermediate_Epithelial	chr11-13451871-13453342
0	0.301264	0.13	0.04	0	Intermediate_Epithelial	chr20-35219409-35220747
0	0.299626	0.23	0.109	0	Intermediate_Epithelial	chr20-10850919-10851878
0	0.299356	0.198	0.084	0	Intermediate_Epithelial	chr6-28823080-28823993
0	0.29934	0.212	0.102	0	Intermediate_Epithelial	chr4-17309857-17312092
0	0.299074	0.196	0.087	0	Intermediate_Epithelial	chr20-54792155-54793650
0	0.298418	0.131	0.044	0	Intermediate_Epithelial	chr14-367881-369070
0	0.294452	0.149	0.054	0	Intermediate_Epithelial	chr15-2666482-2667697
0	0.290998	0.18	0.08	0	Intermediate_Epithelial	chr17-37021240-37022229
0	0.290697	0.137	0.048	0	Intermediate_Epithelial	chr3-28007651-28008882
0	0.2897	0.207	0.097	0	Intermediate_Epithelial	chr18-29153-30479
0	0.289283	0.186	0.085	0	Intermediate_Epithelial	chr20-23818707-23819939
0	0.288014	0.221	0.109	0	Intermediate_Epithelial	chr12-24324865-24326551
0	0.287987	0.193	0.088	0	Intermediate_Epithelial	chr12-4781395-4782941
0	0.286904	0.159	0.063	0	Intermediate_Epithelial	chr17-22090750-22091935
0	0.286766	0.159	0.066	0	Intermediate_Epithelial	chr14-27452-28491
0	0.286299	0.223	0.114	0	Intermediate_Epithelial	chr7-30254875-30256897
0	0.286163	0.264	0.143	0	Intermediate_Epithelial	chr16-51287296-51289012
0	0.285014	0.211	0.105	0	Intermediate_Epithelial	chr3-14585138-14586128
0	0.284959	0.215	0.107	0	Intermediate_Epithelial	chr18-39421058-39422193
0	0.284882	0.117	0.038	0	Intermediate_Epithelial	chr9-34129582-34130467
0	0.284231	0.19	0.091	0	Intermediate_Epithelial	chr8-40071488-40073404
0	0.283408	0.215	0.109	0	Intermediate_Epithelial	chr13-33579059-33580293
0	0.283184	0.341	0.205	0	Intermediate_Epithelial	chr1-1984380-1985726
0	0.283015	0.353	0.208	0	Intermediate_Epithelial	chr8-31104546-31105511
0	0.2829	0.239	0.125	0	Intermediate_Epithelial	chr23-31884442-31885615
0	0.281609	0.162	0.071	0	Intermediate_Epithelial	chr18-15030955-15032243
0	0.280786	0.263	0.143	0	Intermediate_Epithelial	chr12-20202624-20205102
0	0.280678	0.149	0.058	0	Intermediate_Epithelial	chr21-37514695-37516652
0	0.280501	0.252	0.138	0	Intermediate_Epithelial	chr18-15572980-15574029
0	0.280469	0.249	0.135	0	Intermediate_Epithelial	chr16-46481280-46482696
0	0.277737	0.13	0.045	0	Intermediate_Epithelial	chr10-4226903-4228147
0	0.276997	0.284	0.163	0	Intermediate_Epithelial	chr17-1089514-1090558
0	0.27602	0.24	0.129	0	Intermediate_Epithelial	chr5-42998577-43000166
0	0.275674	0.134	0.05	0	Intermediate_Epithelial	chr1-50227704-50228718
0	0.27498	0.176	0.078	0	Intermediate_Epithelial	chr5-59251874-59252954
0	0.274083	0.204	0.104	0	Intermediate_Epithelial	chr7-41815881-41817230
0	0.272719	0.147	0.061	0	Intermediate_Epithelial	chr23-36422910-36423741
0	0.272357	0.194	0.097	0	Intermediate_Epithelial	chr19-29122084-29123254
0	0.272292	0.133	0.05	0	Intermediate_Epithelial	chr6-24427861-24428483
0	0.272198	0.436	0.29	0	Intermediate_Epithelial	chr7-33644746-33646508
0	0.271292	0.145	0.058	0	Intermediate_Epithelial	chr10-5706331-5707365
0	0.270895	0.284	0.165	0	Intermediate_Epithelial	chr23-33253392-33254828
0	0.27032	0.196	0.101	0	Intermediate_Epithelial	chr2-17468722-17469597
0	0.269685	0.213	0.111	0	Intermediate_Epithelial	chr7-7872786-7873739
0	0.269597	0.126	0.048	0	Intermediate_Epithelial	chr14-2563268-2564143
0	0.269565	0.34	0.199	0	Intermediate_Epithelial	chr18-22257-23584
0	0.268777	0.192	0.094	0	Intermediate_Epithelial	chr3-24579789-24581277
0	0.268214	0.162	0.073	0	Intermediate_Epithelial	chr5-26889875-26890801
0	0.267037	0.103	0.031	0	Intermediate_Epithelial	chr6-25071675-25073557
0	0.26666	0.151	0.065	0	Intermediate_Epithelial	chr15-47675359-47676831
0	0.266036	0.169	0.076	0	Intermediate_Epithelial	chr5-66125518-66126816
0	0.265956	0.134	0.053	0	Intermediate_Epithelial	chr24-37748916-37749900
0	0.265811	0.12	0.044	0	Intermediate_Epithelial	chr19-35603341-35604586
0	0.265602	0.223	0.123	0	Intermediate_Epithelial	chr18-24236655-24237962
0	0.265096	0.15	0.061	0	Intermediate_Epithelial	chr2-2044027-2045845
0	0.265023	0.141	0.057	0	Intermediate_Epithelial	chr23-31881586-31882207
0	0.264733	0.216	0.116	0	Intermediate_Epithelial	chr23-31878705-31879700
0	0.264281	0.127	0.048	0	Intermediate_Epithelial	chr21-13641751-13642937
0	0.26395	0.151	0.067	0	Intermediate_Epithelial	chr13-27107403-27108398
0	0.260473	0.105	0.035	0	Intermediate_Epithelial	chr18-7310060-7311034
0	0.257732	0.161	0.078	0	Intermediate_Epithelial	chr7-19405666-19406593
0	0.256728	0.11	0.039	0	Intermediate_Epithelial	chr7-29251705-29252884
0	0.256126	0.247	0.145	0	Intermediate_Epithelial	chr5-5082528-5083356
0	0.256049	0.177	0.088	0	Intermediate_Epithelial	chr1-49252054-49253626
0	0.25583	0.144	0.065	0	Intermediate_Epithelial	chr6-43033853-43034837
0	0.25523	0.171	0.084	0	Intermediate_Epithelial	chr19-21767026-21768666
0	0.254942	0.147	0.068	0	Intermediate_Epithelial	chr21-16343205-16344413
0	0.254783	0.102	0.033	0	Intermediate_Epithelial	chr13-44868727-44870014
0	0.254542	0.197	0.103	0	Intermediate_Epithelial	chr23-31893133-31894557
0	0.254528	0.252	0.146	0	Intermediate_Epithelial	chr7-24066338-24068499
0	0.2545	0.149	0.07	0	Intermediate_Epithelial	chr1-5555832-5557385
0	0.254324	0.17	0.079	0	Intermediate_Epithelial	chr3-14590484-14591719
0	0.254129	0.14	0.059	0	Intermediate_Epithelial	chr20-19053950-19055249
0	0.253971	0.153	0.072	0	Intermediate_Epithelial	chr18-50963616-50965256
0	0.252984	0.131	0.055	0	Intermediate_Epithelial	chr23-2287481-2288703
0	0.252298	0.139	0.06	0	Intermediate_Epithelial	chr3-33394809-33396190
0	0.252074	0.105	0.037	0	Intermediate_Epithelial	chr17-19722149-19722791
0	0.251756	0.143	0.062	0	Intermediate_Epithelial	chr13-24043019-24044087
0	0.251714	0.186	0.097	0	Intermediate_Epithelial	chr19-21698121-21699361
0	0.251379	0.167	0.083	0	Intermediate_Epithelial	chr12-4556788-4558057
0	0.250361	0.168	0.08	0	Intermediate_Epithelial	chr9-38045395-38046871
6.60195e-308	0.251632	0.146	0.067	1.35823e-302	Intermediate_Epithelial	chr3-45254004-45254853
0	0.656809	0.284	0.037	0	Basal_Epithelial	chr1-15159362-15160508
0	0.648696	0.281	0.037	0	Basal_Epithelial	chr3-30920448-30921590
0	0.609222	0.261	0.04	0	Basal_Epithelial	chr8-13106318-13107213
0	0.592645	0.349	0.08	0	Basal_Epithelial	chr10-40251070-40252822
0	0.585353	0.361	0.086	0	Basal_Epithelial	chr19-41681747-41683983
0	0.584738	0.238	0.035	0	Basal_Epithelial	chr14-30291396-30292083
0	0.582138	0.181	0.014	0	Basal_Epithelial	chr5-60346361-60347231
0	0.562141	0.555	0.214	0	Basal_Epithelial	chr10-220070-221906
0	0.56057	0.212	0.029	0	Basal_Epithelial	chr9-37704827-37705933
0	0.549535	0.283	0.063	0	Basal_Epithelial	chr17-31151281-31153435
0	0.549502	0.194	0.023	0	Basal_Epithelial	chr23-28293833-28295287
0	0.543515	0.321	0.079	0	Basal_Epithelial	chr21-6466172-6467181
0	0.541394	0.197	0.027	0	Basal_Epithelial	chr19-32903943-32904757
0	0.538408	0.229	0.041	0	Basal_Epithelial	chr2-68470-69390
0	0.538081	0.241	0.045	0	Basal_Epithelial	chr7-71930269-71931729
0	0.532197	0.272	0.061	0	Basal_Epithelial	chr20-22998158-22999457
0	0.529664	0.189	0.025	0	Basal_Epithelial	chr11-40695611-40696549
0	0.523293	0.165	0.016	0	Basal_Epithelial	chr1-15137862-15139160
0	0.521201	0.171	0.019	0	Basal_Epithelial	chr23-26714923-26715757
0	0.51901	0.225	0.042	0	Basal_Epithelial	chr16-24133565-24135799
0	0.514808	0.159	0.017	0	Basal_Epithelial	chr14-26940885-26941711
0	0.509391	0.26	0.06	0	Basal_Epithelial	chr23-46113490-46114887
0	0.5045	0.203	0.036	0	Basal_Epithelial	chr4-13950232-13951364
0	0.503762	0.141	0.01	0	Basal_Epithelial	chr23-9703768-9704629
0	0.497408	0.168	0.023	0	Basal_Epithelial	chr8-13091187-13092054
0	0.497383	0.213	0.042	0	Basal_Epithelial	chr1-17400998-17402002
0	0.490632	0.285	0.074	0	Basal_Epithelial	chr24-41656240-41657699
0	0.48959	0.178	0.027	0	Basal_Epithelial	chr19-40941333-40941820
0	0.488682	0.132	0.011	0	Basal_Epithelial	chr7-30975005-30975683
0	0.488606	0.225	0.049	0	Basal_Epithelial	chr13-22558966-22559834
0	0.488054	0.225	0.048	0	Basal_Epithelial	chr1-31016208-31017118
0	0.486998	0.143	0.013	0	Basal_Epithelial	chr23-28279292-28280154
0	0.486093	0.385	0.134	0	Basal_Epithelial	chr7-34876568-34878390
0	0.485821	0.311	0.091	0	Basal_Epithelial	chr1-46493412-46494278
0	0.484865	0.142	0.013	0	Basal_Epithelial	chr24-35424339-35425442
0	0.483491	0.251	0.062	0	Basal_Epithelial	chr4-15842724-15843733
0	0.48152	0.184	0.031	0	Basal_Epithelial	chr12-5629163-5630729
0	0.481416	0.161	0.021	0	Basal_Epithelial	chr22-21298557-21299815
0	0.48038	0.157	0.019	0	Basal_Epithelial	chr5-38847001-38848985
0	0.478585	0.293	0.083	0	Basal_Epithelial	chr1-16343441-16344431
0	0.474552	0.164	0.024	0	Basal_Epithelial	chr3-12263782-12264656
0	0.473167	0.237	0.057	0	Basal_Epithelial	chr19-38634724-38636217
0	0.472752	0.17	0.028	0	Basal_Epithelial	chr6-36742590-36743813
0	0.472679	0.22	0.051	0	Basal_Epithelial	chr9-53820451-53821098
0	0.472272	0.203	0.042	0	Basal_Epithelial	chr8-13000165-13001697
0	0.470819	0.242	0.061	0	Basal_Epithelial	chr1-27052614-27054392
0	0.469293	0.292	0.086	0	Basal_Epithelial	chr7-39129776-39131284
0	0.468807	0.278	0.079	0	Basal_Epithelial	chr10-9092646-9094225
0	0.467195	0.188	0.037	0	Basal_Epithelial	chr17-51561696-51562656
0	0.466786	0.173	0.03	0	Basal_Epithelial	chr14-29799756-29800551
0	0.465844	0.257	0.072	0	Basal_Epithelial	chr18-37167007-37168323
0	0.465107	0.157	0.024	0	Basal_Epithelial	chr8-693755-694540
0	0.464311	0.134	0.013	0	Basal_Epithelial	chr1-17410182-17411190
0	0.463331	0.15	0.021	0	Basal_Epithelial	chr18-50132853-50133568
0	0.463298	0.202	0.043	0	Basal_Epithelial	chr21-18205634-18206837
0	0.462837	0.221	0.053	0	Basal_Epithelial	chr20-49667291-49669698
0	0.462448	0.174	0.032	0	Basal_Epithelial	chr5-6104585-6105460
0	0.462139	0.2	0.042	0	Basal_Epithelial	chr7-35417615-35419119
0	0.462046	0.323	0.103	0	Basal_Epithelial	chr18-22605830-22607123
0	0.461404	0.163	0.026	0	Basal_Epithelial	chr9-46763220-46764209
0	0.460676	0.274	0.081	0	Basal_Epithelial	chr13-51639209-51640055
0	0.46057	0.137	0.016	0	Basal_Epithelial	chr9-41886016-41886903
0	0.460043	0.169	0.027	0	Basal_Epithelial	chr1-17376629-17377884
0	0.458503	0.294	0.089	0	Basal_Epithelial	chr9-47817417-47818707
0	0.458213	0.164	0.027	0	Basal_Epithelial	chr9-15505322-15506372
0	0.45755	0.168	0.029	0	Basal_Epithelial	chr17-20831351-20832281
0	0.456886	0.194	0.041	0	Basal_Epithelial	chr3-23182381-23183450
0	0.456755	0.182	0.035	0	Basal_Epithelial	chr21-6526831-6527651
0	0.456197	0.299	0.095	0	Basal_Epithelial	chr14-8177779-8178900
0	0.454609	0.199	0.043	0	Basal_Epithelial	chr14-9511845-9512760
0	0.454536	0.138	0.017	0	Basal_Epithelial	chr16-7898232-7899703
0	0.454415	0.155	0.023	0	Basal_Epithelial	chr5-38857436-38858963
0	0.453396	0.195	0.042	0	Basal_Epithelial	chr14-34609538-34610209
0	0.452906	0.263	0.076	0	Basal_Epithelial	chr21-6779192-6781247
0	0.452816	0.224	0.056	0	Basal_Epithelial	chr3-39454368-39455405
0	0.452218	0.228	0.06	0	Basal_Epithelial	chr11-302659-304260
0	0.451504	0.144	0.019	0	Basal_Epithelial	chr20-48252939-48253873
0	0.451437	0.189	0.039	0	Basal_Epithelial	chr18-44114304-44116449
0	0.450932	0.35	0.121	0	Basal_Epithelial	chr6-57696392-57697861
0	0.450158	0.228	0.058	0	Basal_Epithelial	chr14-49566747-49568206
0	0.448077	0.14	0.017	0	Basal_Epithelial	chr22-1067667-1069686
0	0.447892	0.18	0.035	0	Basal_Epithelial	chr8-26669561-26670595
0	0.447791	0.212	0.052	0	Basal_Epithelial	chr13-382037-383503
0	0.447477	0.302	0.097	0	Basal_Epithelial	chr3-23126838-23128742
0	0.446786	0.358	0.129	0	Basal_Epithelial	chr18-48313892-48315724
0	0.445957	0.171	0.032	0	Basal_Epithelial	chr25-18619600-18620467
0	0.445918	0.13	0.014	0	Basal_Epithelial	chr23-9682758-9683765
0	0.444787	0.141	0.019	0	Basal_Epithelial	chr1-15354405-15355236
0	0.443874	0.29	0.093	0	Basal_Epithelial	chr7-34858342-34859577
0	0.442785	0.204	0.048	0	Basal_Epithelial	chr11-40686766-40687996
0	0.442183	0.189	0.042	0	Basal_Epithelial	chr14-16316138-16317000
0	0.440941	0.143	0.02	0	Basal_Epithelial	chr19-33167827-33168837
0	0.440636	0.182	0.039	0	Basal_Epithelial	chr16-1358243-1359078
0	0.440046	0.164	0.03	0	Basal_Epithelial	chr8-26641642-26642723
0	0.439739	0.225	0.058	0	Basal_Epithelial	chr16-24100993-24102281
0	0.437337	0.195	0.046	0	Basal_Epithelial	chr13-33591632-33592880
0	0.437141	0.26	0.078	0	Basal_Epithelial	chr11-35147831-35148697
0	0.437028	0.393	0.158	0	Basal_Epithelial	chr7-24108571-24109992
0	0.436854	0.145	0.022	0	Basal_Epithelial	chr13-31321190-31321972
0	0.436493	0.215	0.055	0	Basal_Epithelial	chr15-30117192-30117964
0	0.436355	0.154	0.026	0	Basal_Epithelial	chr12-5650041-5650917
0	0.436247	0.214	0.055	0	Basal_Epithelial	chr19-36505857-36506952
0	0.436023	0.301	0.099	0	Basal_Epithelial	chr21-4195222-4196789
0	0.435997	0.14	0.02	0	Basal_Epithelial	chr14-29791424-29792261
0	0.435266	0.145	0.023	0	Basal_Epithelial	chr13-43260935-43261985
0	0.434573	0.197	0.046	0	Basal_Epithelial	chr24-7636938-7637955
0	0.434336	0.251	0.074	0	Basal_Epithelial	chr20-21516315-21517737
0	0.434202	0.167	0.034	0	Basal_Epithelial	chr17-35311144-35312190
0	0.43357	0.24	0.068	0	Basal_Epithelial	chr12-3131843-3133749
0	0.433544	0.144	0.022	0	Basal_Epithelial	chr23-20306475-20307137
0	0.433235	0.14	0.021	0	Basal_Epithelial	chr24-14054055-14055284
0	0.432637	0.206	0.05	0	Basal_Epithelial	chr15-32482340-32483342
0	0.432043	0.354	0.131	0	Basal_Epithelial	chr10-7345935-7348120
0	0.431961	0.127	0.015	0	Basal_Epithelial	chr19-38445113-38446232
0	0.4308	0.169	0.033	0	Basal_Epithelial	chr13-30304396-30305408
0	0.430344	0.153	0.027	0	Basal_Epithelial	chr17-22978476-22979234
0	0.429668	0.201	0.049	0	Basal_Epithelial	chr5-9163204-9163987
0	0.427729	0.3	0.101	0	Basal_Epithelial	chr3-2163811-2166174
0	0.42753	0.216	0.057	0	Basal_Epithelial	chr13-18831508-18832516
0	0.427398	0.15	0.027	0	Basal_Epithelial	chr5-64068345-64069104
0	0.426974	0.152	0.026	0	Basal_Epithelial	chr23-30835042-30836231
0	0.426449	0.128	0.016	0	Basal_Epithelial	chr24-13924259-13925313
0	0.426122	0.153	0.027	0	Basal_Epithelial	chr12-32388431-32389963
0	0.425059	0.173	0.038	0	Basal_Epithelial	chr1-49892099-49893161
0	0.424434	0.167	0.034	0	Basal_Epithelial	chr23-46102419-46104481
0	0.424401	0.109	0.01	0	Basal_Epithelial	chr12-2286366-2287098
0	0.423213	0.129	0.017	0	Basal_Epithelial	chr2-25340567-25341113
0	0.421558	0.159	0.031	0	Basal_Epithelial	chr5-4331808-4332606
0	0.421421	0.283	0.093	0	Basal_Epithelial	chr1-655386-656909
0	0.421374	0.149	0.027	0	Basal_Epithelial	chr16-53125453-53127647
0	0.421148	0.219	0.06	0	Basal_Epithelial	chr15-35905930-35907147
0	0.421125	0.11	0.011	0	Basal_Epithelial	chr19-33915279-33916597
0	0.421122	0.21	0.056	0	Basal_Epithelial	chr6-2905169-2906250
0	0.421067	0.134	0.02	0	Basal_Epithelial	chr16-24111203-24112330
0	0.420747	0.242	0.072	0	Basal_Epithelial	chr23-2036815-2037897
0	0.420225	0.202	0.052	0	Basal_Epithelial	chr13-5170989-5172051
0	0.419485	0.235	0.07	0	Basal_Epithelial	chr22-22848921-22850846
0	0.419411	0.114	0.012	0	Basal_Epithelial	chr8-9936296-9937133
0	0.41935	0.199	0.05	0	Basal_Epithelial	chr11-22006693-22008513
0	0.419284	0.107	0.008	0	Basal_Epithelial	chr9-15469648-15470382
0	0.419233	0.139	0.023	0	Basal_Epithelial	chr13-27687462-27688610
0	0.41852	0.165	0.034	0	Basal_Epithelial	chr23-9784599-9786135
0	0.41847	0.193	0.048	0	Basal_Epithelial	chr4-13254561-13256439
0	0.418461	0.111	0.01	0	Basal_Epithelial	chr15-33628372-33629379
0	0.417277	0.17	0.038	0	Basal_Epithelial	chr11-27483829-27485647
0	0.416949	0.238	0.075	0	Basal_Epithelial	chr14-52550701-52553038
0	0.415297	0.16	0.033	0	Basal_Epithelial	chr17-52060824-52062426
0	0.414834	0.132	0.02	0	Basal_Epithelial	chr20-47638570-47639572
0	0.414829	0.147	0.027	0	Basal_Epithelial	chr24-19518098-19519617
0	0.414496	0.157	0.031	0	Basal_Epithelial	chr25-18594753-18595852
0	0.414283	0.247	0.077	0	Basal_Epithelial	chr2-43570596-43571770
0	0.414106	0.186	0.046	0	Basal_Epithelial	chr1-30993652-30995379
0	0.413279	0.156	0.031	0	Basal_Epithelial	chr9-48369905-48371024
0	0.412779	0.153	0.03	0	Basal_Epithelial	chr24-35444975-35445573
0	0.412158	0.132	0.021	0	Basal_Epithelial	chr20-45074996-45075908
0	0.41193	0.224	0.066	0	Basal_Epithelial	chr8-15565630-15566525
0	0.41158	0.231	0.07	0	Basal_Epithelial	chr7-15470914-15471752
0	0.411578	0.131	0.02	0	Basal_Epithelial	chr12-37484008-37484694
0	0.411269	0.152	0.031	0	Basal_Epithelial	chr18-7923011-7923964
0	0.410285	0.151	0.031	0	Basal_Epithelial	chr5-11928585-11929535
0	0.4099	0.137	0.023	0	Basal_Epithelial	chr1-31018906-31019580
0	0.40874	0.179	0.042	0	Basal_Epithelial	chr10-24746940-24747857
0	0.40842	0.164	0.036	0	Basal_Epithelial	chr2-25357430-25359329
0	0.408393	0.185	0.047	0	Basal_Epithelial	chr20-15017929-15018955
0	0.408353	0.222	0.066	0	Basal_Epithelial	chr18-17830536-17832278
0	0.408181	0.179	0.043	0	Basal_Epithelial	chr2-37803394-37804937
0	0.408138	0.105	0.01	0	Basal_Epithelial	chr7-32341626-32342344
0	0.408084	0.193	0.05	0	Basal_Epithelial	chr17-49672342-49673146
0	0.408056	0.293	0.104	0	Basal_Epithelial	chr6-59487517-59488593
0	0.407921	0.139	0.024	0	Basal_Epithelial	chr1-49855352-49856024
0	0.406752	0.172	0.039	0	Basal_Epithelial	chr9-47654023-47654982
0	0.406364	0.25	0.08	0	Basal_Epithelial	chr5-37784369-37786042
0	0.406044	0.155	0.034	0	Basal_Epithelial	chr20-34242067-34243484
0	0.405972	0.321	0.122	0	Basal_Epithelial	chr9-28383180-28385487
0	0.405735	0.308	0.113	0	Basal_Epithelial	chr20-29084221-29085731
0	0.405565	0.156	0.033	0	Basal_Epithelial	chr21-20192062-20193176
0	0.405485	0.163	0.036	0	Basal_Epithelial	chr11-23641224-23642105
0	0.405363	0.185	0.047	0	Basal_Epithelial	chr23-24166750-24168289
0	0.405328	0.219	0.064	0	Basal_Epithelial	chr3-30921985-30922949
0	0.405314	0.243	0.077	0	Basal_Epithelial	chr19-40965863-40966679
0	0.4051	0.136	0.023	0	Basal_Epithelial	chr3-28556807-28557852
0	0.403991	0.135	0.023	0	Basal_Epithelial	chr24-41563296-41564210
0	0.403854	0.194	0.051	0	Basal_Epithelial	chr21-24631156-24633097
0	0.403431	0.233	0.073	0	Basal_Epithelial	chr24-9386674-9388492
0	0.403082	0.207	0.059	0	Basal_Epithelial	chr23-5363889-5366180
0	0.403058	0.193	0.051	0	Basal_Epithelial	chr15-18066768-18067714
0	0.402477	0.14	0.025	0	Basal_Epithelial	chr15-9107719-9108652
0	0.402383	0.208	0.059	0	Basal_Epithelial	chr21-6585447-6587482
0	0.401314	0.234	0.071	0	Basal_Epithelial	chr20-45546358-45547279
0	0.400783	0.151	0.031	0	Basal_Epithelial	chr5-37555107-37556487
0	0.400605	0.267	0.093	0	Basal_Epithelial	chr24-3048123-3049990
0	0.400584	0.109	0.012	0	Basal_Epithelial	chr18-44110479-44111324
0	0.40033	0.273	0.096	0	Basal_Epithelial	chr1-679416-682623
0	0.399944	0.227	0.072	0	Basal_Epithelial	chr22-26535508-26536653
0	0.399498	0.123	0.018	0	Basal_Epithelial	chr21-22163853-22164822
0	0.399445	0.256	0.086	0	Basal_Epithelial	chr9-12811469-12812194
0	0.399364	0.189	0.05	0	Basal_Epithelial	chr18-9268499-9270083
0	0.399335	0.237	0.075	0	Basal_Epithelial	chr19-22202273-22203715
0	0.399257	0.14	0.026	0	Basal_Epithelial	chr1-2109186-2109811
0	0.398268	0.141	0.028	0	Basal_Epithelial	chr12-7548127-7548800
0	0.398095	0.194	0.053	0	Basal_Epithelial	chr14-8794563-8796531
0	0.398022	0.131	0.022	0	Basal_Epithelial	chr5-65786376-65787203
0	0.39769	0.15	0.032	0	Basal_Epithelial	chr12-22258343-22259813
0	0.397546	0.155	0.033	0	Basal_Epithelial	chr24-35417330-35418164
0	0.397532	0.158	0.036	0	Basal_Epithelial	chr7-15252068-15252945
0	0.397328	0.13	0.021	0	Basal_Epithelial	chr13-22012299-22013115
0	0.397198	0.175	0.043	0	Basal_Epithelial	chr23-36561894-36563119
0	0.396999	0.251	0.082	0	Basal_Epithelial	chr6-36548874-36550419
0	0.396686	0.196	0.055	0	Basal_Epithelial	chr13-33125230-33126546
0	0.396466	0.253	0.085	0	Basal_Epithelial	chr25-5871792-5872942
0	0.396385	0.155	0.034	0	Basal_Epithelial	chr7-47117564-47118329
0	0.396327	0.166	0.039	0	Basal_Epithelial	chr18-2987988-2988672
0	0.39622	0.161	0.037	0	Basal_Epithelial	chr9-47511053-47512243
0	0.396102	0.276	0.098	0	Basal_Epithelial	chr19-40982738-40984444
0	0.395841	0.155	0.034	0	Basal_Epithelial	chr15-32562693-32563666
0	0.395804	0.155	0.034	0	Basal_Epithelial	chr12-21713304-21714600
0	0.395764	0.216	0.068	0	Basal_Epithelial	chr13-24841592-24843146
0	0.39541	0.15	0.033	0	Basal_Epithelial	chr7-73666226-73666837
0	0.395267	0.314	0.118	0	Basal_Epithelial	chr5-52844351-52846009
0	0.394654	0.198	0.056	0	Basal_Epithelial	chr20-45597181-45597900
0	0.393539	0.146	0.029	0	Basal_Epithelial	chr22-19935675-19936572
0	0.393214	0.291	0.108	0	Basal_Epithelial	chr25-35998638-35999432
0	0.392776	0.168	0.039	0	Basal_Epithelial	chr18-17856191-17858121
0	0.39216	0.142	0.029	0	Basal_Epithelial	chr19-2710539-2711475
0	0.392069	0.267	0.096	0	Basal_Epithelial	chr8-15212600-15213724
0	0.391249	0.201	0.058	0	Basal_Epithelial	chr6-2951124-2952412
0	0.39102	0.197	0.057	0	Basal_Epithelial	chr7-26348136-26350451
0	0.390027	0.125	0.021	0	Basal_Epithelial	chr9-34493772-34495179
0	0.38968	0.186	0.05	0	Basal_Epithelial	chr10-24758830-24759753
0	0.389254	0.154	0.035	0	Basal_Epithelial	chr17-35176729-35177395
0	0.388596	0.11	0.015	0	Basal_Epithelial	chr14-37133886-37134888
0	0.388312	0.32	0.127	0	Basal_Epithelial	chr2-59510-60975
0	0.388139	0.368	0.158	0	Basal_Epithelial	chr15-1397221-1398122
0	0.388094	0.121	0.019	0	Basal_Epithelial	chr13-6883553-6884465
0	0.387943	0.334	0.136	0	Basal_Epithelial	chr7-35502307-35503423
0	0.387833	0.331	0.136	0	Basal_Epithelial	chr11-822731-824622
0	0.38775	0.156	0.036	0	Basal_Epithelial	chr8-30013805-30014555
0	0.387496	0.118	0.018	0	Basal_Epithelial	chr17-21934764-21935826
0	0.386938	0.112	0.016	0	Basal_Epithelial	chr5-6689373-6690119
0	0.38675	0.193	0.055	0	Basal_Epithelial	chr9-9775907-9777625
0	0.386471	0.168	0.042	0	Basal_Epithelial	chr2-37097364-37099347
0	0.386244	0.171	0.044	0	Basal_Epithelial	chr2-62245-62836
0	0.385931	0.176	0.046	0	Basal_Epithelial	chr3-29522123-29523086
0	0.385863	0.248	0.085	0	Basal_Epithelial	chr9-54664707-54666013
0	0.385711	0.117	0.018	0	Basal_Epithelial	chr24-7634370-7635219
0	0.385688	0.136	0.027	0	Basal_Epithelial	chr11-33066019-33066899
0	0.385626	0.215	0.066	0	Basal_Epithelial	chr7-46688310-46689784
0	0.385588	0.215	0.067	0	Basal_Epithelial	chr18-2837245-2838493
0	0.385061	0.104	0.013	0	Basal_Epithelial	chr12-153893-155099
0	0.385004	0.147	0.033	0	Basal_Epithelial	chr9-54624709-54625680
0	0.384694	0.182	0.05	0	Basal_Epithelial	chr18-23061670-23062582
0	0.38447	0.136	0.027	0	Basal_Epithelial	chr13-31296264-31298209
0	0.384308	0.18	0.049	0	Basal_Epithelial	chr7-41560010-41561027
0	0.384291	0.174	0.045	0	Basal_Epithelial	chr15-18001273-18002547
0	0.384221	0.124	0.021	0	Basal_Epithelial	chr9-41943959-41944838
0	0.383919	0.133	0.025	0	Basal_Epithelial	chr20-49681460-49682885
0	0.383848	0.152	0.032	0	Basal_Epithelial	chr1-17373917-17375382
0	0.38372	0.113	0.017	0	Basal_Epithelial	chr3-42777213-42778294
0	0.383342	0.124	0.021	0	Basal_Epithelial	chr21-25156732-25157746
0	0.383299	0.123	0.023	0	Basal_Epithelial	chr22-20393282-20394247
0	0.383178	0.339	0.137	0	Basal_Epithelial	chr21-28668819-28670718
0	0.382552	0.154	0.035	0	Basal_Epithelial	chr12-20699756-20701803
0	0.382385	0.132	0.026	0	Basal_Epithelial	chr17-51155385-51156268
0	0.382139	0.129	0.023	0	Basal_Epithelial	chr25-19500611-19501783
0	0.381956	0.164	0.041	0	Basal_Epithelial	chr15-9117202-9117995
0	0.381839	0.13	0.024	0	Basal_Epithelial	chr15-33640442-33641254
0	0.381282	0.12	0.02	0	Basal_Epithelial	chr23-9767616-9769011
0	0.381071	0.164	0.042	0	Basal_Epithelial	chr18-17865995-17868136
0	0.380869	0.114	0.017	0	Basal_Epithelial	chr22-15260385-15261533
0	0.380681	0.117	0.019	0	Basal_Epithelial	chr22-38983350-38984132
0	0.380548	0.109	0.015	0	Basal_Epithelial	chr20-30512882-30513881
0	0.380428	0.148	0.033	0	Basal_Epithelial	chr9-15424080-15425036
0	0.379831	0.142	0.031	0	Basal_Epithelial	chr21-16555553-16556671
0	0.379684	0.121	0.021	0	Basal_Epithelial	chr19-35049477-35050752
0	0.379016	0.119	0.021	0	Basal_Epithelial	chr24-41629245-41630164
0	0.378306	0.12	0.021	0	Basal_Epithelial	chr21-18122015-18122852
0	0.37786	0.115	0.017	0	Basal_Epithelial	chr17-53010002-53011039
0	0.377758	0.128	0.024	0	Basal_Epithelial	chr22-38762507-38763682
0	0.377568	0.255	0.093	0	Basal_Epithelial	chr12-26849050-26852282
0	0.377257	0.178	0.049	0	Basal_Epithelial	chr18-22611295-22612189
0	0.377183	0.176	0.051	0	Basal_Epithelial	chr15-29241342-29242689
0	0.377094	0.111	0.017	0	Basal_Epithelial	chr8-12958673-12959669
0	0.377051	0.218	0.07	0	Basal_Epithelial	chr3-39800331-39801426
0	0.37694	0.184	0.051	0	Basal_Epithelial	chr12-48042639-48043854
0	0.376787	0.206	0.062	0	Basal_Epithelial	chr1-16394139-16395360
0	0.376352	0.147	0.033	0	Basal_Epithelial	chr14-25955857-25957446
0	0.376214	0.135	0.027	0	Basal_Epithelial	chr15-29386611-29388031
0	0.376185	0.135	0.027	0	Basal_Epithelial	chr14-8174451-8175163
0	0.37618	0.261	0.097	0	Basal_Epithelial	chr16-5857622-5858388
0	0.376113	0.288	0.111	0	Basal_Epithelial	chr1-36075905-36077028
0	0.375846	0.113	0.017	0	Basal_Epithelial	chr1-15136123-15136774
0	0.375829	0.11	0.016	0	Basal_Epithelial	chr8-4944490-4945405
0	0.37527	0.185	0.053	0	Basal_Epithelial	chr9-12788425-12789541
0	0.375177	0.182	0.053	0	Basal_Epithelial	chr21-45305242-45306349
0	0.375058	0.115	0.018	0	Basal_Epithelial	chr21-36942281-36943223
0	0.375026	0.206	0.065	0	Basal_Epithelial	chr21-20200366-20201382
0	0.374204	0.264	0.097	0	Basal_Epithelial	chr21-15668200-15669981
0	0.374119	0.263	0.097	0	Basal_Epithelial	chr16-215415-216774
0	0.374084	0.11	0.017	0	Basal_Epithelial	chr7-32289101-32290139
0	0.373996	0.104	0.014	0	Basal_Epithelial	chr18-42462132-42463099
0	0.373752	0.196	0.059	0	Basal_Epithelial	chr18-50999191-51000606
0	0.373611	0.141	0.03	0	Basal_Epithelial	chr20-23005082-23006495
0	0.373578	0.164	0.042	0	Basal_Epithelial	chr9-56121451-56122743
0	0.372809	0.132	0.026	0	Basal_Epithelial	chr24-35398086-35399368
0	0.372665	0.118	0.021	0	Basal_Epithelial	chr8-29124240-29125296
0	0.372503	0.26	0.098	0	Basal_Epithelial	chr5-11223102-11224086
0	0.372424	0.139	0.029	0	Basal_Epithelial	chr9-42679092-42680498
0	0.372354	0.171	0.047	0	Basal_Epithelial	chr9-56149011-56149979
0	0.372332	0.144	0.032	0	Basal_Epithelial	chr10-38854898-38855569
0	0.371748	0.163	0.043	0	Basal_Epithelial	chr23-17293713-17294733
0	0.371222	0.117	0.02	0	Basal_Epithelial	chr1-30962705-30963838
0	0.370988	0.107	0.015	0	Basal_Epithelial	chr2-18227547-18228684
0	0.370891	0.112	0.019	0	Basal_Epithelial	chr13-33532882-33533666
0	0.370878	0.233	0.08	0	Basal_Epithelial	chr3-5963455-5964730
0	0.370435	0.16	0.041	0	Basal_Epithelial	chr2-56737167-56738288
0	0.370432	0.162	0.043	0	Basal_Epithelial	chr10-38511607-38513030
0	0.370375	0.127	0.025	0	Basal_Epithelial	chr6-18079143-18080076
0	0.370326	0.254	0.093	0	Basal_Epithelial	chr1-23783387-23785025
0	0.370098	0.307	0.124	0	Basal_Epithelial	chr21-28665213-28666955
0	0.369651	0.114	0.019	0	Basal_Epithelial	chr13-43739573-43740053
0	0.369597	0.262	0.098	0	Basal_Epithelial	chr7-35312786-35314939
0	0.369467	0.111	0.017	0	Basal_Epithelial	chr22-12232568-12233529
0	0.368988	0.11	0.018	0	Basal_Epithelial	chr13-32765093-32765852
0	0.368982	0.117	0.022	0	Basal_Epithelial	chr8-15181651-15182648
0	0.368838	0.184	0.055	0	Basal_Epithelial	chr15-8884401-8885475
0	0.368779	0.12	0.021	0	Basal_Epithelial	chr23-28291546-28292361
0	0.368755	0.118	0.021	0	Basal_Epithelial	chr19-5072514-5074141
0	0.368266	0.128	0.025	0	Basal_Epithelial	chr14-32586786-32588136
0	0.36803	0.112	0.018	0	Basal_Epithelial	chr7-48177893-48178826
0	0.36798	0.231	0.08	0	Basal_Epithelial	chr3-12977591-12978760
0	0.367596	0.112	0.019	0	Basal_Epithelial	chr9-47054954-47056049
0	0.367563	0.133	0.029	0	Basal_Epithelial	chr8-19081884-19082770
0	0.367151	0.237	0.084	0	Basal_Epithelial	chr5-21484516-21486440
0	0.367111	0.184	0.054	0	Basal_Epithelial	chr7-50509115-50510367
0	0.366879	0.232	0.082	0	Basal_Epithelial	chr6-28860593-28861544
0	0.366721	0.164	0.044	0	Basal_Epithelial	chr20-22977545-22978619
0	0.366713	0.117	0.021	0	Basal_Epithelial	chr2-35914117-35915106
0	0.366495	0.153	0.039	0	Basal_Epithelial	chr23-35426164-35427501
0	0.366398	0.112	0.019	0	Basal_Epithelial	chr2-18515169-18516160
0	0.366177	0.1	0.013	0	Basal_Epithelial	chr13-41961783-41962520
0	0.365679	0.108	0.017	0	Basal_Epithelial	chr14-1612410-1613215
0	0.365648	0.108	0.016	0	Basal_Epithelial	chr19-38627188-38628695
0	0.365529	0.126	0.025	0	Basal_Epithelial	chr14-25264915-25265966
0	0.36538	0.118	0.022	0	Basal_Epithelial	chr9-13855510-13857116
0	0.365356	0.137	0.031	0	Basal_Epithelial	chr6-44361675-44363265
0	0.365201	0.127	0.026	0	Basal_Epithelial	chr22-16768313-16769383
0	0.364908	0.159	0.043	0	Basal_Epithelial	chr22-21625375-21627438
0	0.364794	0.219	0.073	0	Basal_Epithelial	chr24-3109950-3110581
0	0.36471	0.158	0.042	0	Basal_Epithelial	chr17-25460516-25461238
0	0.364644	0.132	0.028	0	Basal_Epithelial	chr18-42031584-42032610
0	0.364345	0.115	0.02	0	Basal_Epithelial	chr22-32882259-32883458
0	0.364022	0.124	0.025	0	Basal_Epithelial	chr23-3141779-3142550
0	0.363777	0.281	0.111	0	Basal_Epithelial	chr13-37506076-37508094
0	0.36346	0.125	0.026	0	Basal_Epithelial	chr3-62117063-62117867
0	0.363398	0.238	0.089	0	Basal_Epithelial	chr15-47296631-47297514
0	0.362789	0.133	0.029	0	Basal_Epithelial	chr1-16365808-16366973
0	0.362753	0.189	0.056	0	Basal_Epithelial	chr18-30156907-30160171
0	0.362718	0.155	0.041	0	Basal_Epithelial	chr20-11430765-11432094
0	0.362662	0.115	0.02	0	Basal_Epithelial	chr11-40705431-40706253
0	0.362373	0.114	0.02	0	Basal_Epithelial	chr23-26716734-26717504
0	0.362138	0.196	0.063	0	Basal_Epithelial	chr6-14661624-14662848
0	0.361879	0.152	0.038	0	Basal_Epithelial	chr18-22503391-22506001
0	0.361724	0.163	0.044	0	Basal_Epithelial	chr13-24749784-24750452
0	0.361689	0.237	0.087	0	Basal_Epithelial	chr24-268592-271452
0	0.361652	0.111	0.019	0	Basal_Epithelial	chr9-41890775-41891437
0	0.361167	0.167	0.046	0	Basal_Epithelial	chr18-11040040-11041058
0	0.361121	0.199	0.063	0	Basal_Epithelial	chr1-31006026-31008941
0	0.360451	0.149	0.039	0	Basal_Epithelial	chr9-17556665-17558029
0	0.360372	0.12	0.022	0	Basal_Epithelial	chr3-28524232-28526055
0	0.360261	0.176	0.051	0	Basal_Epithelial	chr17-20300811-20301614
0	0.360199	0.205	0.067	0	Basal_Epithelial	chr12-30775984-30778243
0	0.35977	0.198	0.064	0	Basal_Epithelial	chr6-7781935-7782733
0	0.359687	0.125	0.026	0	Basal_Epithelial	chr5-58974162-58974805
0	0.359666	0.12	0.023	0	Basal_Epithelial	chr18-29340842-29341820
0	0.359549	0.25	0.094	0	Basal_Epithelial	chr15-1371836-1373580
0	0.359452	0.327	0.143	0	Basal_Epithelial	chr14-960309-962520
0	0.359384	0.113	0.019	0	Basal_Epithelial	chr10-30618058-30618866
0	0.359321	0.233	0.083	0	Basal_Epithelial	chr18-1179757-1180499
0	0.359258	0.149	0.039	0	Basal_Epithelial	chr3-27985668-27986838
0	0.358956	0.385	0.181	0	Basal_Epithelial	chr15-1389110-1390457
0	0.358733	0.186	0.06	0	Basal_Epithelial	chr21-13402702-13404024
0	0.358691	0.161	0.043	0	Basal_Epithelial	chr13-30448419-30449780
0	0.358343	0.198	0.064	0	Basal_Epithelial	chr9-25816887-25818020
0	0.358288	0.116	0.022	0	Basal_Epithelial	chr1-643620-645228
0	0.358098	0.2	0.065	0	Basal_Epithelial	chr9-42695144-42696937
0	0.358083	0.211	0.074	0	Basal_Epithelial	chr24-9255818-9256815
0	0.357939	0.2	0.065	0	Basal_Epithelial	chr12-32408447-32409529
0	0.357817	0.292	0.119	0	Basal_Epithelial	chr9-12808902-12810227
0	0.356873	0.187	0.058	0	Basal_Epithelial	chr18-19684761-19686038
0	0.356496	0.152	0.04	0	Basal_Epithelial	chr8-33019436-33021214
0	0.356464	0.12	0.024	0	Basal_Epithelial	chr12-29762437-29764408
0	0.356389	0.174	0.052	0	Basal_Epithelial	chr17-52821521-52824097
0	0.356327	0.112	0.02	0	Basal_Epithelial	chr13-599560-600240
0	0.356327	0.125	0.027	0	Basal_Epithelial	chr6-48211775-48212728
0	0.356272	0.155	0.041	0	Basal_Epithelial	chr20-38011702-38012853
0	0.356209	0.222	0.08	0	Basal_Epithelial	chr3-5892067-5893126
0	0.35619	0.163	0.046	0	Basal_Epithelial	chr22-29406899-29407622
0	0.356168	0.114	0.021	0	Basal_Epithelial	chr17-40219223-40220454
0	0.356002	0.144	0.036	0	Basal_Epithelial	chr21-39057998-39058900
0	0.355582	0.324	0.14	0	Basal_Epithelial	chr20-45811822-45812754
0	0.355561	0.157	0.043	0	Basal_Epithelial	chr18-4083747-4084343
0	0.355557	0.245	0.091	0	Basal_Epithelial	chr8-48891031-48892206
0	0.355504	0.136	0.032	0	Basal_Epithelial	chr1-712629-714989
0	0.355495	0.116	0.023	0	Basal_Epithelial	chr25-20377585-20378894
0	0.355266	0.301	0.125	0	Basal_Epithelial	chr8-48876860-48878073
0	0.355233	0.104	0.016	0	Basal_Epithelial	chr4-15862327-15863552
0	0.355214	0.104	0.017	0	Basal_Epithelial	chr7-70864748-70865533
0	0.355074	0.14	0.034	0	Basal_Epithelial	chr20-38032090-38032886
0	0.355017	0.142	0.034	0	Basal_Epithelial	chr24-7639783-7640674
0	0.355016	0.355	0.16	0	Basal_Epithelial	chr19-1784849-1787095
0	0.354975	0.151	0.041	0	Basal_Epithelial	chr13-24474460-24475353
0	0.354954	0.21	0.071	0	Basal_Epithelial	chr24-9371209-9372583
0	0.354882	0.156	0.043	0	Basal_Epithelial	chr25-30859301-30860254
0	0.354877	0.104	0.016	0	Basal_Epithelial	chr16-24012759-24013702
0	0.354823	0.102	0.015	0	Basal_Epithelial	chr18-22548069-22548976
0	0.354605	0.12	0.026	0	Basal_Epithelial	chr13-1528627-1530170
0	0.354593	0.145	0.036	0	Basal_Epithelial	chr12-35832655-35833482
0	0.354502	0.106	0.017	0	Basal_Epithelial	chr8-13089080-13089588
0	0.354362	0.228	0.083	0	Basal_Epithelial	chr7-17927994-17929158
0	0.354254	0.248	0.094	0	Basal_Epithelial	chr18-44128649-44129527
0	0.354248	0.242	0.091	0	Basal_Epithelial	chr22-38738616-38740758
0	0.354205	0.153	0.041	0	Basal_Epithelial	chr9-47678539-47679337
0	0.354197	0.111	0.019	0	Basal_Epithelial	chr7-10079720-10080713
0	0.354107	0.105	0.017	0	Basal_Epithelial	chr2-35918828-35919413
0	0.354092	0.111	0.02	0	Basal_Epithelial	chr18-47656897-47658096
0	0.354014	0.158	0.044	0	Basal_Epithelial	chr5-31219565-31220228
0	0.353995	0.143	0.036	0	Basal_Epithelial	chr6-7785868-7787120
0	0.353989	0.164	0.047	0	Basal_Epithelial	chr7-39082667-39084320
0	0.353977	0.192	0.062	0	Basal_Epithelial	chr5-9654423-9655486
0	0.353942	0.166	0.048	0	Basal_Epithelial	chr15-18064816-18065348
0	0.353682	0.113	0.021	0	Basal_Epithelial	chr6-27599117-27600012
0	0.353505	0.135	0.031	0	Basal_Epithelial	chr15-45293751-45294855
0	0.35343	0.1	0.015	0	Basal_Epithelial	chr22-32890627-32891473
0	0.353392	0.129	0.03	0	Basal_Epithelial	chr25-11341770-11342365
0	0.353346	0.129	0.029	0	Basal_Epithelial	chr9-47047852-47049173
0	0.353174	0.198	0.066	0	Basal_Epithelial	chr21-42657843-42659181
0	0.352878	0.11	0.02	0	Basal_Epithelial	chr8-1351861-1352931
0	0.352769	0.182	0.057	0	Basal_Epithelial	chr3-12968020-12969396
0	0.352408	0.141	0.035	0	Basal_Epithelial	chr20-40958424-40959187
0	0.352311	0.142	0.036	0	Basal_Epithelial	chr13-19686639-19687329
0	0.352293	0.153	0.043	0	Basal_Epithelial	chr2-21746351-21747704
0	0.351821	0.102	0.016	0	Basal_Epithelial	chr17-37880584-37881757
0	0.351578	0.21	0.073	0	Basal_Epithelial	chr20-29061424-29062576
0	0.351487	0.145	0.037	0	Basal_Epithelial	chr13-29078848-29080083
0	0.351389	0.11	0.02	0	Basal_Epithelial	chr23-26688522-26689665
0	0.351328	0.231	0.084	0	Basal_Epithelial	chr10-3728869-3731407
0	0.351174	0.151	0.041	0	Basal_Epithelial	chr17-43366555-43367602
0	0.350989	0.116	0.023	0	Basal_Epithelial	chr15-43840638-43841789
0	0.350885	0.118	0.023	0	Basal_Epithelial	chr15-30112001-30112872
0	0.350858	0.122	0.027	0	Basal_Epithelial	chr14-39861755-39862771
0	0.350853	0.209	0.072	0	Basal_Epithelial	chr3-31640435-31641418
0	0.350625	0.103	0.017	0	Basal_Epithelial	chr9-11308163-11309025
0	0.35058	0.135	0.032	0	Basal_Epithelial	chr17-23018642-23020235
0	0.350449	0.183	0.06	0	Basal_Epithelial	chr16-26726218-26727234
0	0.350401	0.116	0.024	0	Basal_Epithelial	chr12-479122-479861
0	0.350383	0.14	0.035	0	Basal_Epithelial	chr10-6224166-6225380
0	0.350352	0.188	0.061	0	Basal_Epithelial	chr8-13080254-13081278
0	0.350319	0.177	0.054	0	Basal_Epithelial	chr25-18534091-18535301
0	0.350267	0.19	0.062	0	Basal_Epithelial	chr7-51033103-51034184
0	0.350077	0.14	0.034	0	Basal_Epithelial	chr6-21001179-21002771
0	0.350054	0.273	0.111	0	Basal_Epithelial	chr8-40270258-40271502
0	0.34999	0.126	0.028	0	Basal_Epithelial	chr19-9402056-9403164
0	0.349893	0.102	0.018	0	Basal_Epithelial	chr24-25428008-25428761
0	0.349873	0.184	0.059	0	Basal_Epithelial	chr17-51519529-51521316
0	0.349379	0.135	0.033	0	Basal_Epithelial	chr22-3620957-3621953
0	0.349208	0.396	0.195	0	Basal_Epithelial	chr19-47973454-47974979
0	0.349196	0.149	0.041	0	Basal_Epithelial	chr11-43193590-43194527
0	0.348942	0.111	0.02	0	Basal_Epithelial	chr3-39784342-39785901
0	0.348657	0.17	0.052	0	Basal_Epithelial	chr8-30819840-30821089
0	0.348552	0.132	0.032	0	Basal_Epithelial	chr15-36109806-36110712
0	0.348454	0.153	0.043	0	Basal_Epithelial	chr4-21671793-21672892
0	0.348354	0.137	0.035	0	Basal_Epithelial	chr13-1616104-1616933
0	0.348124	0.109	0.021	0	Basal_Epithelial	chr24-20807576-20808772
0	0.348101	0.154	0.043	0	Basal_Epithelial	chr8-19312844-19313825
0	0.348012	0.156	0.044	0	Basal_Epithelial	chr18-23965669-23966832
0	0.347756	0.193	0.064	0	Basal_Epithelial	chr3-31873900-31875580
0	0.347694	0.203	0.068	0	Basal_Epithelial	chr13-4202463-4203323
0	0.347624	0.16	0.046	0	Basal_Epithelial	chr12-13907509-13909190
0	0.347596	0.118	0.025	0	Basal_Epithelial	chr16-1375020-1375740
0	0.347417	0.131	0.031	0	Basal_Epithelial	chr1-30990425-30990981
0	0.347409	0.194	0.065	0	Basal_Epithelial	chr15-42396909-42397790
0	0.347257	0.133	0.033	0	Basal_Epithelial	chr23-23286081-23287052
0	0.347212	0.125	0.028	0	Basal_Epithelial	chr24-1339103-1340191
0	0.346676	0.112	0.021	0	Basal_Epithelial	chr6-2954826-2955632
0	0.3466	0.176	0.055	0	Basal_Epithelial	chr13-42709673-42710498
0	0.346598	0.181	0.058	0	Basal_Epithelial	chr20-29880429-29882092
0	0.346378	0.118	0.025	0	Basal_Epithelial	chr8-36769478-36770419
0	0.346161	0.145	0.039	0	Basal_Epithelial	chr12-24637426-24638279
0	0.345935	0.131	0.031	0	Basal_Epithelial	chr2-35923444-35924929
0	0.345906	0.112	0.021	0	Basal_Epithelial	chr18-4072965-4073843
0	0.345692	0.166	0.05	0	Basal_Epithelial	chr6-36820998-36822551
0	0.34551	0.174	0.054	0	Basal_Epithelial	chr25-1021019-1022154
0	0.345474	0.107	0.019	0	Basal_Epithelial	chr4-23776495-23777615
0	0.345238	0.172	0.052	0	Basal_Epithelial	chr9-15426553-15427631
0	0.345141	0.148	0.04	0	Basal_Epithelial	chr1-54406656-54407928
0	0.344939	0.114	0.022	0	Basal_Epithelial	chr22-33069640-33070873
0	0.344911	0.215	0.078	0	Basal_Epithelial	chr20-6589484-6590848
0	0.344904	0.108	0.021	0	Basal_Epithelial	chr6-42547649-42548738
0	0.344514	0.158	0.045	0	Basal_Epithelial	chr19-47401989-47402675
0	0.344514	0.226	0.085	0	Basal_Epithelial	chr2-21784534-21785562
0	0.344352	0.112	0.022	0	Basal_Epithelial	chr12-20769909-20770655
0	0.344236	0.167	0.051	0	Basal_Epithelial	chr22-21407218-21407922
0	0.34411	0.193	0.065	0	Basal_Epithelial	chr21-10969469-10971014
0	0.344035	0.165	0.049	0	Basal_Epithelial	chr12-25849884-25850758
0	0.343873	0.207	0.074	0	Basal_Epithelial	chr5-49620875-49621878
0	0.343716	0.155	0.044	0	Basal_Epithelial	chr15-1821248-1822352
0	0.343098	0.419	0.21	0	Basal_Epithelial	chr5-32545671-32547086
0	0.343049	0.104	0.018	0	Basal_Epithelial	chr20-28176561-28177559
0	0.342953	0.253	0.102	0	Basal_Epithelial	chr6-13823599-13825212
0	0.342856	0.1	0.016	0	Basal_Epithelial	chr1-46508531-46509408
0	0.342469	0.154	0.044	0	Basal_Epithelial	chr21-9765278-9766129
0	0.342259	0.106	0.02	0	Basal_Epithelial	chr19-22276087-22276775
0	0.341901	0.127	0.029	0	Basal_Epithelial	chr21-6460635-6461465
0	0.341857	0.1	0.017	0	Basal_Epithelial	chr8-11700649-11701646
0	0.341802	0.104	0.018	0	Basal_Epithelial	chr10-35686555-35687811
0	0.341743	0.309	0.137	0	Basal_Epithelial	chr6-36880728-36882563
0	0.341622	0.176	0.055	0	Basal_Epithelial	chr16-30818900-30820214
0	0.341597	0.205	0.073	0	Basal_Epithelial	chr8-33003534-33004441
0	0.341506	0.206	0.074	0	Basal_Epithelial	chr24-1906476-1907300
0	0.34148	0.145	0.039	0	Basal_Epithelial	chr3-12298009-12299225
0	0.341459	0.169	0.053	0	Basal_Epithelial	chr16-12565554-12567006
0	0.341204	0.226	0.083	0	Basal_Epithelial	chr20-48437254-48438470
0	0.340944	0.243	0.096	0	Basal_Epithelial	chr11-34838448-34839551
0	0.340911	0.126	0.03	0	Basal_Epithelial	chr7-33673120-33674354
0	0.340888	0.147	0.041	0	Basal_Epithelial	chr5-35052339-35053446
0	0.340709	0.167	0.051	0	Basal_Epithelial	chr7-39934542-39935972
0	0.340632	0.157	0.046	0	Basal_Epithelial	chr9-53797204-53798051
0	0.340337	0.114	0.023	0	Basal_Epithelial	chr15-21412385-21414099
0	0.340079	0.129	0.031	0	Basal_Epithelial	chr23-36545250-36546244
0	0.339901	0.147	0.04	0	Basal_Epithelial	chr18-22608306-22608754
0	0.339826	0.131	0.032	0	Basal_Epithelial	chr20-31637885-31638627
0	0.339034	0.153	0.043	0	Basal_Epithelial	chr5-37245814-37247859
0	0.338997	0.217	0.081	0	Basal_Epithelial	chr7-73593457-73595640
0	0.338901	0.122	0.029	0	Basal_Epithelial	chr25-9348529-9349797
0	0.338597	0.117	0.025	0	Basal_Epithelial	chr1-41276386-41277467
0	0.338525	0.142	0.038	0	Basal_Epithelial	chr6-55884023-55885461
0	0.338326	0.1	0.017	0	Basal_Epithelial	chr21-25005174-25005944
0	0.338295	0.15	0.042	0	Basal_Epithelial	chr9-17500441-17501980
0	0.338131	0.168	0.053	0	Basal_Epithelial	chr7-33005752-33007117
0	0.337889	0.12	0.027	0	Basal_Epithelial	chr18-27515145-27516180
0	0.337784	0.198	0.07	0	Basal_Epithelial	chr15-25680815-25681607
0	0.337494	0.13	0.032	0	Basal_Epithelial	chr21-24961402-24962199
0	0.337462	0.109	0.022	0	Basal_Epithelial	chr6-40261353-40262221
0	0.337289	0.133	0.034	0	Basal_Epithelial	chr12-33038056-33040302
0	0.337116	0.105	0.02	0	Basal_Epithelial	chr15-6461162-6462258
0	0.33711	0.147	0.041	0	Basal_Epithelial	chr21-26898678-26899730
0	0.337064	0.208	0.076	0	Basal_Epithelial	chr17-28084626-28085874
0	0.336801	0.116	0.026	0	Basal_Epithelial	chr7-68999883-69000974
0	0.336793	0.106	0.021	0	Basal_Epithelial	chr14-5562681-5563591
0	0.336724	0.118	0.026	0	Basal_Epithelial	chr9-22734358-22735114
0	0.33664	0.136	0.035	0	Basal_Epithelial	chr14-34605353-34606025
0	0.336628	0.151	0.043	0	Basal_Epithelial	chr11-42656031-42657083
0	0.336524	0.111	0.024	0	Basal_Epithelial	chr8-24281316-24282384
0	0.336185	0.101	0.019	0	Basal_Epithelial	chr8-34119460-34120485
0	0.336181	0.133	0.034	0	Basal_Epithelial	chr1-58024538-58025601
0	0.336056	0.14	0.038	0	Basal_Epithelial	chr14-5529967-5531161
0	0.335909	0.168	0.054	0	Basal_Epithelial	chr15-22342861-22343936
0	0.335808	0.107	0.022	0	Basal_Epithelial	chr18-37082441-37083297
0	0.335785	0.154	0.046	0	Basal_Epithelial	chr9-56088319-56088907
0	0.335636	0.18	0.061	0	Basal_Epithelial	chr16-51578578-51579810
0	0.33534	0.101	0.018	0	Basal_Epithelial	chr18-2772440-2773305
0	0.33531	0.256	0.105	0	Basal_Epithelial	chr18-46829205-46830982
0	0.335278	0.188	0.064	0	Basal_Epithelial	chr1-19943373-19944643
0	0.335267	0.217	0.082	0	Basal_Epithelial	chr22-21246161-21247495
0	0.33502	0.103	0.019	0	Basal_Epithelial	chr4-8536828-8537801
0	0.33487	0.122	0.028	0	Basal_Epithelial	chr17-18514649-18515664
0	0.334796	0.172	0.055	0	Basal_Epithelial	chr24-3107071-3107850
0	0.334617	0.181	0.06	0	Basal_Epithelial	chr25-31586215-31587231
0	0.334481	0.288	0.125	0	Basal_Epithelial	chr19-18490740-18494183
0	0.334478	0.154	0.045	0	Basal_Epithelial	chr5-6480731-6481444
0	0.334423	0.1	0.018	0	Basal_Epithelial	chr4-7754514-7755079
0	0.334228	0.131	0.035	0	Basal_Epithelial	chr21-13565764-13566559
0	0.334182	0.107	0.022	0	Basal_Epithelial	chr1-51365219-51366343
0	0.334152	0.122	0.028	0	Basal_Epithelial	chr21-6577101-6578048
0	0.334078	0.127	0.032	0	Basal_Epithelial	chr11-24191720-24192274
0	0.334047	0.168	0.053	0	Basal_Epithelial	chr23-23042537-23043982
0	0.333951	0.103	0.02	0	Basal_Epithelial	chr8-31301690-31302435
0	0.333881	0.166	0.051	0	Basal_Epithelial	chr3-25606204-25606988
0	0.333831	0.165	0.051	0	Basal_Epithelial	chr2-21923758-21925068
0	0.333814	0.195	0.067	0	Basal_Epithelial	chr15-8909896-8911056
0	0.333774	0.108	0.021	0	Basal_Epithelial	chr5-44415325-44416165
0	0.333605	0.137	0.036	0	Basal_Epithelial	chr8-38841318-38842815
0	0.333485	0.213	0.08	0	Basal_Epithelial	chr9-636027-637363
0	0.333402	0.135	0.035	0	Basal_Epithelial	chr18-14032320-14033310
0	0.333366	0.121	0.028	0	Basal_Epithelial	chr24-35447856-35448834
0	0.333328	0.135	0.036	0	Basal_Epithelial	chr19-29064264-29065043
0	0.333161	0.111	0.023	0	Basal_Epithelial	chr6-11154690-11155618
0	0.333115	0.149	0.043	0	Basal_Epithelial	chr21-889992-890471
0	0.332876	0.142	0.039	0	Basal_Epithelial	chr22-22847689-22848446
0	0.332827	0.111	0.023	0	Basal_Epithelial	chr15-18045969-18046757
0	0.332826	0.163	0.051	0	Basal_Epithelial	chr16-33974789-33975824
0	0.332672	0.229	0.09	0	Basal_Epithelial	chr1-325833-326661
0	0.332634	0.132	0.035	0	Basal_Epithelial	chr22-15863772-15864475
0	0.332519	0.119	0.027	0	Basal_Epithelial	chr3-34845908-34846674
0	0.332456	0.129	0.032	0	Basal_Epithelial	chr9-10632134-10633941
0	0.332431	0.139	0.037	0	Basal_Epithelial	chr24-7644927-7645817
0	0.332375	0.163	0.052	0	Basal_Epithelial	chr25-24261357-24262866
0	0.332215	0.234	0.091	0	Basal_Epithelial	chr24-26844348-26846118
0	0.332032	0.186	0.066	0	Basal_Epithelial	chr6-59442728-59443638
0	0.331961	0.26	0.108	0	Basal_Epithelial	chr14-7207055-7208519
0	0.331953	0.206	0.076	0	Basal_Epithelial	chr3-57112922-57114321
0	0.331796	0.121	0.029	0	Basal_Epithelial	chr13-20628241-20629415
0	0.331732	0.1	0.019	0	Basal_Epithelial	chr11-25346179-25347457
0	0.331556	0.228	0.09	0	Basal_Epithelial	chr6-28792919-28794990
0	0.331496	0.169	0.054	0	Basal_Epithelial	chr15-30095059-30096265
0	0.331473	0.135	0.035	0	Basal_Epithelial	chr23-27911080-27912733
0	0.331355	0.103	0.019	0	Basal_Epithelial	chr7-68909402-68910457
0	0.331111	0.119	0.028	0	Basal_Epithelial	chr12-37934705-37935573
0	0.330988	0.159	0.05	0	Basal_Epithelial	chr19-4006645-4007532
0	0.330969	0.119	0.028	0	Basal_Epithelial	chr19-42889442-42890212
0	0.330867	0.11	0.023	0	Basal_Epithelial	chr16-35648484-35649491
0	0.330856	0.136	0.037	0	Basal_Epithelial	chr23-1900324-1901471
0	0.330689	0.125	0.031	0	Basal_Epithelial	chr17-52862177-52863343
0	0.330639	0.107	0.022	0	Basal_Epithelial	chr16-34506865-34507859
0	0.330521	0.145	0.041	0	Basal_Epithelial	chr2-71350-72026
0	0.330507	0.152	0.047	0	Basal_Epithelial	chr7-60395188-60395978
0	0.330311	0.135	0.038	0	Basal_Epithelial	chr7-26724368-26725215
0	0.330124	0.176	0.059	0	Basal_Epithelial	chr18-43084736-43085656
0	0.329919	0.112	0.024	0	Basal_Epithelial	chr3-37637246-37637884
0	0.329878	0.14	0.039	0	Basal_Epithelial	chr2-46069886-46070643
0	0.329798	0.113	0.025	0	Basal_Epithelial	chr7-9506962-9508041
0	0.329773	0.134	0.036	0	Basal_Epithelial	chr11-41876712-41877335
0	0.329667	0.257	0.106	0	Basal_Epithelial	chr7-33022325-33024099
0	0.329588	0.113	0.026	0	Basal_Epithelial	chr23-23691643-23692411
0	0.32957	0.193	0.069	0	Basal_Epithelial	chr11-24510496-24511476
0	0.329569	0.133	0.035	0	Basal_Epithelial	chr4-7449222-7450189
0	0.329559	0.112	0.024	0	Basal_Epithelial	chr3-5897468-5898303
0	0.329541	0.148	0.044	0	Basal_Epithelial	chr13-44983234-44984290
0	0.329477	0.175	0.057	0	Basal_Epithelial	chr8-54208149-54209362
0	0.329417	0.17	0.056	0	Basal_Epithelial	chr15-32710405-32711742
0	0.329326	0.122	0.029	0	Basal_Epithelial	chr21-6604053-6605196
0	0.329266	0.104	0.02	0	Basal_Epithelial	chr6-37238233-37239599
0	0.329024	0.135	0.036	0	Basal_Epithelial	chr11-27886773-27887688
0	0.329008	0.128	0.032	0	Basal_Epithelial	chr19-29067244-29068420
0	0.328983	0.11	0.024	0	Basal_Epithelial	chr9-27487437-27488700
0	0.328837	0.115	0.026	0	Basal_Epithelial	chr10-11761591-11762746
0	0.328807	0.202	0.073	0	Basal_Epithelial	chr19-3670229-3671297
0	0.32877	0.135	0.036	0	Basal_Epithelial	chr6-46018060-46018802
0	0.328765	0.183	0.063	0	Basal_Epithelial	chr11-25594167-25594976
0	0.328574	0.141	0.039	0	Basal_Epithelial	chr12-22835534-22836818
0	0.328403	0.122	0.03	0	Basal_Epithelial	chr11-28796503-28797520
0	0.328385	0.145	0.041	0	Basal_Epithelial	chr8-40404798-40405993
0	0.32824	0.146	0.042	0	Basal_Epithelial	chr6-7249108-7250131
0	0.328217	0.114	0.026	0	Basal_Epithelial	chr25-31626243-31627425
0	0.328162	0.14	0.039	0	Basal_Epithelial	chr25-2406667-2407569
0	0.328126	0.257	0.109	0	Basal_Epithelial	chr24-35387072-35387857
0	0.327663	0.178	0.061	0	Basal_Epithelial	chr5-14864726-14865438
0	0.327601	0.114	0.026	0	Basal_Epithelial	chr15-16302679-16303512
0	0.327574	0.166	0.053	0	Basal_Epithelial	chr17-22531570-22532443
0	0.327567	0.159	0.051	0	Basal_Epithelial	chr12-48066844-48067994
0	0.327419	0.136	0.037	0	Basal_Epithelial	chr17-23150147-23150978
0	0.327393	0.126	0.032	0	Basal_Epithelial	chr12-48075779-48076745
0	0.327293	0.2	0.074	0	Basal_Epithelial	chr1-58035004-58035802
0	0.326863	0.133	0.035	0	Basal_Epithelial	chr9-17843127-17844357
0	0.326853	0.222	0.085	0	Basal_Epithelial	chr5-22132952-22134188
0	0.326439	0.125	0.031	0	Basal_Epithelial	chr7-50460287-50461572
0	0.326388	0.14	0.039	0	Basal_Epithelial	chr19-41310028-41310780
0	0.326255	0.116	0.028	0	Basal_Epithelial	chr12-7764953-7766054
0	0.326252	0.109	0.024	0	Basal_Epithelial	chr14-5590346-5591116
0	0.326164	0.172	0.057	0	Basal_Epithelial	chr3-40576160-40579291
0	0.326155	0.116	0.027	0	Basal_Epithelial	chr17-23011789-23013183
0	0.326083	0.208	0.079	0	Basal_Epithelial	chr7-5416331-5417536
0	0.325987	0.249	0.104	0	Basal_Epithelial	chr2-5753255-5754498
0	0.325836	0.156	0.05	0	Basal_Epithelial	chr12-35061047-35062351
0	0.325828	0.119	0.029	0	Basal_Epithelial	chr15-40665141-40666443
0	0.32579	0.26	0.108	0	Basal_Epithelial	chr20-45598639-45599555
0	0.325714	0.137	0.038	0	Basal_Epithelial	chr7-38870476-38871418
0	0.325611	0.144	0.043	0	Basal_Epithelial	chr5-70166036-70166976
0	0.325563	0.187	0.066	0	Basal_Epithelial	chr1-23819989-23820764
0	0.325515	0.25	0.104	0	Basal_Epithelial	chr14-8803135-8804644
0	0.325416	0.227	0.09	0	Basal_Epithelial	chr24-2108063-2109416
0	0.325123	0.191	0.068	0	Basal_Epithelial	chr11-23210868-23212309
0	0.324934	0.101	0.019	0	Basal_Epithelial	chr7-51047837-51049005
0	0.324822	0.107	0.022	0	Basal_Epithelial	chr13-21287375-21288606
0	0.324672	0.104	0.022	0	Basal_Epithelial	chr11-26567768-26569478
0	0.324568	0.148	0.046	0	Basal_Epithelial	chr16-39061541-39062789
0	0.324511	0.175	0.059	0	Basal_Epithelial	chr18-469788-470690
0	0.324417	0.106	0.023	0	Basal_Epithelial	chr14-48587397-48589072
0	0.324364	0.166	0.054	0	Basal_Epithelial	chr19-6462437-6463854
0	0.324244	0.322	0.153	0	Basal_Epithelial	chr11-257137-258572
0	0.323902	0.102	0.021	0	Basal_Epithelial	chr23-22499605-22500600
0	0.323567	0.171	0.057	0	Basal_Epithelial	chr25-12608076-12608942
0	0.323529	0.118	0.028	0	Basal_Epithelial	chr23-35421158-35421906
0	0.323486	0.166	0.054	0	Basal_Epithelial	chr15-29774766-29775700
0	0.323356	0.193	0.071	0	Basal_Epithelial	chr2-21485615-21487584
0	0.323254	0.137	0.039	0	Basal_Epithelial	chr19-3848976-3849585
0	0.322986	0.224	0.089	0	Basal_Epithelial	chr9-9606391-9607337
0	0.322765	0.141	0.042	0	Basal_Epithelial	chr14-6444212-6445364
0	0.322566	0.136	0.038	0	Basal_Epithelial	chr13-45687683-45688700
0	0.32255	0.205	0.078	0	Basal_Epithelial	chr19-41998057-41999641
0	0.322527	0.13	0.036	0	Basal_Epithelial	chr12-10842826-10843900
0	0.322346	0.148	0.045	0	Basal_Epithelial	chr1-40101963-40103115
0	0.322178	0.147	0.044	0	Basal_Epithelial	chr21-30139176-30140080
0	0.321893	0.139	0.039	0	Basal_Epithelial	chr5-36438612-36440027
0	0.321732	0.2	0.074	0	Basal_Epithelial	chr17-27107666-27108623
0	0.321136	0.138	0.039	0	Basal_Epithelial	chr15-31641607-31643435
0	0.320999	0.126	0.033	0	Basal_Epithelial	chr1-16396871-16397865
0	0.320861	0.167	0.056	0	Basal_Epithelial	chr23-36371526-36372360
0	0.320848	0.203	0.077	0	Basal_Epithelial	chr20-34906717-34908090
0	0.320775	0.149	0.045	0	Basal_Epithelial	chr14-5545405-5546891
0	0.320682	0.315	0.146	0	Basal_Epithelial	chr16-20631914-20632966
0	0.320625	0.166	0.054	0	Basal_Epithelial	chr3-31620901-31623915
0	0.320548	0.128	0.034	0	Basal_Epithelial	chr2-35953336-35953931
0	0.320521	0.148	0.044	0	Basal_Epithelial	chr7-67996630-67997809
0	0.320519	0.164	0.054	0	Basal_Epithelial	chr18-45199938-45201329
0	0.320437	0.218	0.087	0	Basal_Epithelial	chr6-36494265-36495534
0	0.320408	0.152	0.046	0	Basal_Epithelial	chr15-32713210-32715968
0	0.320284	0.166	0.055	0	Basal_Epithelial	chr5-37517340-37518503
0	0.320125	0.302	0.139	0	Basal_Epithelial	chr13-33133195-33135127
0	0.320102	0.144	0.043	0	Basal_Epithelial	chr9-17785805-17786685
0	0.32004	0.133	0.036	0	Basal_Epithelial	chr19-41328617-41329622
0	0.319991	0.127	0.034	0	Basal_Epithelial	chr2-35885674-35886469
0	0.319931	0.202	0.076	0	Basal_Epithelial	chr21-6470507-6471382
0	0.319791	0.18	0.064	0	Basal_Epithelial	chr10-30579159-30580304
0	0.319778	0.168	0.056	0	Basal_Epithelial	chr1-12924142-12925045
0	0.319474	0.174	0.06	0	Basal_Epithelial	chr18-298388-299440
0	0.319351	0.105	0.023	0	Basal_Epithelial	chr3-32460444-32460986
0	0.319275	0.125	0.033	0	Basal_Epithelial	chr17-51722804-51724428
0	0.319238	0.238	0.099	0	Basal_Epithelial	chr10-13378847-13380609
0	0.319029	0.111	0.026	0	Basal_Epithelial	chr16-20703137-20703879
0	0.318958	0.155	0.05	0	Basal_Epithelial	chr3-1174552-1175648
0	0.318896	0.107	0.024	0	Basal_Epithelial	chr9-47027726-47028750
0	0.318729	0.115	0.027	0	Basal_Epithelial	chr24-28888452-28890203
0	0.318666	0.143	0.043	0	Basal_Epithelial	chr20-48260285-48261098
0	0.318655	0.249	0.107	0	Basal_Epithelial	chr1-36144483-36145417
0	0.318518	0.113	0.026	0	Basal_Epithelial	chr13-14515662-14516536
0	0.318498	0.1	0.02	0	Basal_Epithelial	chr5-6627481-6628268
0	0.318241	0.213	0.084	0	Basal_Epithelial	chr16-17347616-17348239
0	0.317983	0.137	0.039	0	Basal_Epithelial	chr23-46140812-46141799
0	0.317934	0.156	0.051	0	Basal_Epithelial	chr17-23050061-23051208
0	0.317829	0.119	0.03	0	Basal_Epithelial	chr18-4040193-4040921
0	0.317538	0.201	0.074	0	Basal_Epithelial	chr18-22569227-22570126
0	0.317305	0.106	0.024	0	Basal_Epithelial	chr7-35412179-35412907
0	0.317129	0.113	0.027	0	Basal_Epithelial	chr2-43634857-43636766
0	0.317014	0.124	0.033	0	Basal_Epithelial	chr12-40534425-40535408
0	0.316921	0.13	0.037	0	Basal_Epithelial	chr12-1604886-1606052
0	0.316889	0.127	0.035	0	Basal_Epithelial	chr1-46550391-46551371
0	0.316821	0.141	0.042	0	Basal_Epithelial	chr11-22160133-22161017
0	0.316744	0.147	0.045	0	Basal_Epithelial	chr3-33755195-33755919
0	0.316598	0.492	0.271	0	Basal_Epithelial	chr13-36388751-36391872
0	0.316249	0.136	0.04	0	Basal_Epithelial	chr22-21003848-21005596
0	0.316211	0.153	0.049	0	Basal_Epithelial	chr24-41707225-41708134
0	0.316191	0.248	0.105	0	Basal_Epithelial	chr8-16989653-16990664
0	0.316092	0.27	0.118	0	Basal_Epithelial	chr2-39674451-39676338
0	0.315929	0.236	0.096	0	Basal_Epithelial	chr3-28074292-28076006
0	0.315528	0.118	0.031	0	Basal_Epithelial	chr5-54815602-54816963
0	0.315405	0.143	0.044	0	Basal_Epithelial	chr15-32315806-32316779
0	0.315212	0.13	0.037	0	Basal_Epithelial	chr7-12252378-12253464
0	0.315161	0.109	0.025	0	Basal_Epithelial	chr20-29049944-29050817
0	0.315116	0.132	0.038	0	Basal_Epithelial	chr7-65783702-65784721
0	0.315054	0.149	0.047	0	Basal_Epithelial	chr7-31109561-31110717
0	0.31482	0.132	0.037	0	Basal_Epithelial	chr22-38447608-38448490
0	0.314729	0.148	0.046	0	Basal_Epithelial	chr21-45280466-45281314
0	0.314666	0.123	0.034	0	Basal_Epithelial	chr7-37339919-37341212
0	0.314583	0.181	0.065	0	Basal_Epithelial	chr12-37511937-37513176
0	0.314521	0.112	0.027	0	Basal_Epithelial	chr12-9079496-9080284
0	0.314496	0.11	0.026	0	Basal_Epithelial	chr8-23459604-23460736
0	0.314453	0.13	0.036	0	Basal_Epithelial	chr14-48555467-48556218
0	0.314282	0.107	0.024	0	Basal_Epithelial	chr17-42706397-42707408
0	0.314118	0.179	0.064	0	Basal_Epithelial	chr22-16913715-16914985
0	0.314007	0.151	0.046	0	Basal_Epithelial	chr7-9903985-9905005
0	0.31399	0.113	0.028	0	Basal_Epithelial	chr24-13852878-13853847
0	0.31395	0.106	0.024	0	Basal_Epithelial	chr1-17440483-17441415
0	0.3138	0.138	0.041	0	Basal_Epithelial	chr15-35609383-35610248
0	0.313752	0.154	0.05	0	Basal_Epithelial	chr5-32801275-32801867
0	0.313724	0.221	0.09	0	Basal_Epithelial	chr23-2404525-2405550
0	0.313277	0.121	0.033	0	Basal_Epithelial	chr16-42345688-42346435
0	0.313055	0.101	0.021	0	Basal_Epithelial	chr7-36744371-36745448
0	0.312992	0.258	0.114	0	Basal_Epithelial	chr19-6502521-6504106
0	0.312856	0.117	0.03	0	Basal_Epithelial	chr13-42707786-42708609
0	0.312795	0.183	0.066	0	Basal_Epithelial	chr19-3586180-3587005
0	0.312779	0.137	0.04	0	Basal_Epithelial	chr10-38643093-38644058
0	0.312662	0.189	0.071	0	Basal_Epithelial	chr13-19761300-19762298
0	0.312632	0.101	0.022	0	Basal_Epithelial	chr25-30918004-30919743
0	0.312594	0.126	0.035	0	Basal_Epithelial	chr7-46415646-46416822
0	0.312483	0.107	0.025	0	Basal_Epithelial	chr23-27870607-27871266
0	0.312453	0.117	0.028	0	Basal_Epithelial	chr9-41840287-41841879
0	0.31226	0.11	0.026	0	Basal_Epithelial	chr24-21256409-21257616
0	0.312192	0.157	0.052	0	Basal_Epithelial	chr15-30091708-30092501
0	0.311946	0.234	0.097	0	Basal_Epithelial	chr18-22793057-22794524
0	0.311923	0.117	0.031	0	Basal_Epithelial	chr13-42659124-42660177
0	0.311751	0.159	0.053	0	Basal_Epithelial	chr17-35161509-35163226
0	0.311662	0.126	0.035	0	Basal_Epithelial	chr19-42017741-42019038
0	0.311658	0.162	0.055	0	Basal_Epithelial	chr19-40951331-40952208
0	0.311529	0.174	0.063	0	Basal_Epithelial	chr3-28112479-28113512
0	0.311501	0.125	0.034	0	Basal_Epithelial	chr8-51502874-51503747
0	0.311489	0.146	0.045	0	Basal_Epithelial	chr22-5274489-5275393
0	0.311469	0.187	0.07	0	Basal_Epithelial	chr25-29664321-29664974
0	0.311392	0.188	0.07	0	Basal_Epithelial	chr7-15512114-15513206
0	0.311388	0.167	0.057	0	Basal_Epithelial	chr5-25432725-25433497
0	0.311381	0.112	0.028	0	Basal_Epithelial	chr3-12969721-12970683
0	0.311081	0.16	0.053	0	Basal_Epithelial	chr19-41659762-41660929
0	0.311078	0.126	0.035	0	Basal_Epithelial	chr17-50170380-50172507
0	0.311052	0.122	0.033	0	Basal_Epithelial	chr8-15226930-15227735
0	0.31084	0.106	0.024	0	Basal_Epithelial	chr18-44120570-44121590
0	0.310736	0.162	0.055	0	Basal_Epithelial	chr21-6422185-6424185
0	0.310718	0.109	0.026	0	Basal_Epithelial	chr9-26145311-26146570
0	0.310371	0.108	0.026	0	Basal_Epithelial	chr7-15517543-15518452
0	0.310262	0.113	0.029	0	Basal_Epithelial	chr16-38725241-38725941
0	0.310185	0.16	0.053	0	Basal_Epithelial	chr3-28535346-28536899
0	0.31009	0.112	0.027	0	Basal_Epithelial	chr18-19712666-19713426
0	0.310045	0.117	0.03	0	Basal_Epithelial	chr20-2095570-2097801
0	0.309866	0.22	0.089	0	Basal_Epithelial	chr20-31904988-31906419
0	0.309857	0.104	0.024	0	Basal_Epithelial	chr17-11770081-11771074
0	0.309796	0.134	0.04	0	Basal_Epithelial	chr11-22123677-22125841
0	0.30978	0.178	0.063	0	Basal_Epithelial	chr16-24006159-24007677
0	0.309751	0.168	0.058	0	Basal_Epithelial	chr7-50513478-50514479
0	0.309672	0.103	0.023	0	Basal_Epithelial	chr20-34713906-34714676
0	0.30967	0.148	0.048	0	Basal_Epithelial	chr8-14933425-14935489
0	0.309448	0.257	0.11	0	Basal_Epithelial	chr1-43543935-43545019
0	0.309386	0.253	0.112	0	Basal_Epithelial	chr2-820030-821822
0	0.309311	0.166	0.057	0	Basal_Epithelial	chr12-32405101-32406820
0	0.309294	0.104	0.023	0	Basal_Epithelial	chr7-36915187-36916501
0	0.309111	0.264	0.118	0	Basal_Epithelial	chr23-45479634-45481125
0	0.30892	0.186	0.071	0	Basal_Epithelial	chr11-23059308-23060427
0	0.308891	0.192	0.074	0	Basal_Epithelial	chr8-47357487-47358548
0	0.308802	0.148	0.047	0	Basal_Epithelial	chr19-47160909-47162031
0	0.308667	0.116	0.03	0	Basal_Epithelial	chr14-5116794-5118655
0	0.308644	0.101	0.022	0	Basal_Epithelial	chr18-44029546-44030547
0	0.308504	0.121	0.033	0	Basal_Epithelial	chr14-44401483-44402338
0	0.308354	0.207	0.083	0	Basal_Epithelial	chr16-27359471-27360251
0	0.308317	0.118	0.031	0	Basal_Epithelial	chr7-26427035-26428279
0	0.30822	0.112	0.027	0	Basal_Epithelial	chr12-3189694-3190478
0	0.30806	0.11	0.027	0	Basal_Epithelial	chr15-35441811-35442512
0	0.307884	0.194	0.076	0	Basal_Epithelial	chr16-39293909-39294866
0	0.307759	0.102	0.023	0	Basal_Epithelial	chr14-26580647-26581827
0	0.307734	0.123	0.034	0	Basal_Epithelial	chr14-46888594-46889461
0	0.307673	0.302	0.145	0	Basal_Epithelial	chr17-24873885-24875085
0	0.307438	0.102	0.022	0	Basal_Epithelial	chr10-25992443-25994463
0	0.307411	0.199	0.079	0	Basal_Epithelial	chr24-2984859-2985663
0	0.30721	0.131	0.039	0	Basal_Epithelial	chr9-14504211-14505073
0	0.307115	0.175	0.064	0	Basal_Epithelial	chr4-23758863-23760571
0	0.307096	0.178	0.065	0	Basal_Epithelial	chr16-22618008-22619155
0	0.307074	0.104	0.024	0	Basal_Epithelial	chr10-30329864-30330936
0	0.307025	0.118	0.032	0	Basal_Epithelial	chr3-34291472-34292355
0	0.306972	0.202	0.08	0	Basal_Epithelial	chr4-24030532-24032251
0	0.306654	0.154	0.051	0	Basal_Epithelial	chr19-2370689-2371823
0	0.30635	0.1	0.023	0	Basal_Epithelial	chr25-19394353-19395328
0	0.306161	0.2	0.077	0	Basal_Epithelial	chr23-45436349-45437217
0	0.30612	0.113	0.029	0	Basal_Epithelial	chr12-35476164-35477331
0	0.306061	0.125	0.036	0	Basal_Epithelial	chr16-35318126-35319492
0	0.306044	0.145	0.046	0	Basal_Epithelial	chr12-5119276-5120647
0	0.30604	0.138	0.043	0	Basal_Epithelial	chr14-7053183-7054266
0	0.305994	0.103	0.024	0	Basal_Epithelial	chr22-34678354-34679293
0	0.305932	0.143	0.046	0	Basal_Epithelial	chr3-8361492-8362417
0	0.305879	0.173	0.062	0	Basal_Epithelial	chr20-48221963-48223145
0	0.305805	0.135	0.041	0	Basal_Epithelial	chr16-22623275-22624317
0	0.305775	0.137	0.042	0	Basal_Epithelial	chr23-3229752-3230879
0	0.305771	0.1	0.022	0	Basal_Epithelial	chr13-51641145-51641780
0	0.305732	0.105	0.025	0	Basal_Epithelial	chr17-42635613-42636983
0	0.305689	0.113	0.031	0	Basal_Epithelial	chr19-222568-224376
0	0.305663	0.115	0.03	0	Basal_Epithelial	chr18-25616154-25617331
0	0.305661	0.193	0.076	0	Basal_Epithelial	chr5-46324294-46325107
0	0.305376	0.122	0.033	0	Basal_Epithelial	chr10-38876177-38877516
0	0.305347	0.166	0.06	0	Basal_Epithelial	chr17-1193779-1194797
0	0.305335	0.106	0.025	0	Basal_Epithelial	chr5-60480985-60482132
0	0.305038	0.106	0.025	0	Basal_Epithelial	chr11-27892088-27892924
0	0.304691	0.131	0.039	0	Basal_Epithelial	chr18-37029428-37030696
0	0.304669	0.127	0.037	0	Basal_Epithelial	chr25-15649379-15650129
0	0.304557	0.173	0.063	0	Basal_Epithelial	chr5-37750868-37752246
0	0.304323	0.142	0.046	0	Basal_Epithelial	chr25-18341983-18342883
0	0.304232	0.14	0.043	0	Basal_Epithelial	chr23-28222236-28224228
0	0.304217	0.2	0.079	0	Basal_Epithelial	chr1-15328841-15329670
0	0.304192	0.103	0.024	0	Basal_Epithelial	chr20-45460636-45461596
0	0.30387	0.304	0.146	0	Basal_Epithelial	chr13-52114271-52115964
0	0.303804	0.171	0.061	0	Basal_Epithelial	chr2-22152422-22153469
0	0.303651	0.176	0.066	0	Basal_Epithelial	chr23-8678676-8679609
0	0.303315	0.136	0.043	0	Basal_Epithelial	chr14-7091993-7092715
0	0.303282	0.231	0.099	0	Basal_Epithelial	chr8-25168179-25169888
0	0.303274	0.123	0.035	0	Basal_Epithelial	chr18-27524883-27525880
0	0.303175	0.124	0.035	0	Basal_Epithelial	chr5-15251215-15252019
0	0.303168	0.101	0.023	0	Basal_Epithelial	chr19-4201876-4203071
0	0.30306	0.156	0.053	0	Basal_Epithelial	chr2-32323077-32324145
0	0.303005	0.103	0.024	0	Basal_Epithelial	chr14-25959140-25959870
0	0.302994	0.127	0.037	0	Basal_Epithelial	chr17-21918957-21919912
0	0.302858	0.174	0.063	0	Basal_Epithelial	chr18-25105753-25107078
0	0.302686	0.108	0.027	0	Basal_Epithelial	chr20-3831553-3832649
0	0.302668	0.132	0.04	0	Basal_Epithelial	chr17-53130417-53131995
0	0.302664	0.149	0.049	0	Basal_Epithelial	chr21-619899-620647
0	0.302651	0.188	0.073	0	Basal_Epithelial	chr13-33822021-33823081
0	0.302644	0.162	0.057	0	Basal_Epithelial	chr5-39473308-39474506
0	0.302253	0.16	0.055	0	Basal_Epithelial	chr6-48001180-48002016
0	0.301991	0.171	0.062	0	Basal_Epithelial	chr12-7589528-7590825
0	0.30193	0.101	0.023	0	Basal_Epithelial	chr20-52585403-52586180
0	0.301923	0.1	0.023	0	Basal_Epithelial	chr6-6994719-6995654
0	0.301792	0.131	0.04	0	Basal_Epithelial	chr1-49868858-49869728
0	0.301518	0.149	0.05	0	Basal_Epithelial	chr3-36057800-36058691
0	0.301475	0.19	0.074	0	Basal_Epithelial	chr9-47504239-47505379
0	0.301245	0.196	0.077	0	Basal_Epithelial	chr12-20765998-20768876
0	0.301233	0.166	0.061	0	Basal_Epithelial	chr21-310444-311358
0	0.301112	0.114	0.031	0	Basal_Epithelial	chr12-3211842-3212704
0	0.300844	0.111	0.029	0	Basal_Epithelial	chr19-6166030-6166800
[truncated: 8,108 more rows]

## Sheet: Supplementary Table S1E
Supplementary Table S1. Basic QC and cell type differentially expressed features
E Cell type Differentially enriched motifs (top50)
p_val	avg_diff	pct.1	pct.2	p_val_adj	cell types	MotifID_TF
0	3.74278	0.953	0.331	0	Superficial_Epithelial	MA0808.1_TEAD3
0	3.481	0.948	0.334	0	Superficial_Epithelial	MA0809.2_TEAD4
0	3.44469	0.948	0.335	0	Superficial_Epithelial	MA1121.1_TEAD2
0	3.34381	0.947	0.334	0	Superficial_Epithelial	MA0090.3_TEAD1
0	3.22115	0.929	0.393	0	Superficial_Epithelial	MA0493.1_Klf1
0	2.87087	0.941	0.444	0	Superficial_Epithelial	MA0647.1_GRHL1
0	2.77262	0.941	0.442	0	Superficial_Epithelial	MA1105.2_GRHL2
0	2.7667	0.926	0.395	0	Superficial_Epithelial	MA1511.1_KLF10
0	2.51891	0.907	0.399	0	Superficial_Epithelial	MA1515.1_KLF2
0	2.47397	0.913	0.406	0	Superficial_Epithelial	MA1517.1_KLF6
0	2.22811	0.907	0.44	0	Superficial_Epithelial	MA0145.3_TFCP2
0	2.1041	0.896	0.394	0	Superficial_Epithelial	MA0742.1_Klf12
0	1.99041	0.837	0.352	0	Superficial_Epithelial	MA0652.1_IRF8
0	1.84557	0.815	0.359	0	Superficial_Epithelial	MA1419.1_IRF4
0	1.7539	0.813	0.36	0	Superficial_Epithelial	MA0653.1_IRF9
0	1.70881	0.856	0.402	0	Superficial_Epithelial	MA1516.1_KLF3
0	1.6782	0.869	0.41	0	Superficial_Epithelial	MA1512.1_KLF11
0	1.53964	0.88	0.546	0	Superficial_Epithelial	MA1558.1_SNAI1
0	1.5117	0.88	0.548	0	Superficial_Epithelial	MA1559.1_SNAI3
0	1.47025	0.807	0.392	0	Superficial_Epithelial	MA1420.1_IRF5
0	1.37315	0.859	0.536	0	Superficial_Epithelial	MA0745.2_SNAI2
0	1.30882	0.788	0.333	0	Superficial_Epithelial	MA0640.2_ELF3
0	1.29362	0.824	0.427	0	Superficial_Epithelial	MA0746.2_SP3
0	1.28153	0.755	0.379	0	Superficial_Epithelial	MA0051.1_IRF2
0	1.21176	0.762	0.349	0	Superficial_Epithelial	MA0136.2_ELF5
0	1.21119	0.751	0.389	0	Superficial_Epithelial	MA0772.1_IRF7
0	0.987771	0.763	0.431	0	Superficial_Epithelial	MA0774.1_MEIS2
0	0.984069	0.765	0.431	0	Superficial_Epithelial	MA0498.2_MEIS1
0	0.981138	0.782	0.451	0	Superficial_Epithelial	MA0079.4_SP1
0	0.97155	0.728	0.339	0	Superficial_Epithelial	MA0598.3_EHF
0	0.953786	0.797	0.562	0	Superficial_Epithelial	MA0103.3_ZEB1
0	0.950221	0.69	0.384	0	Superficial_Epithelial	MA1418.1_IRF3
0	0.941137	0.77	0.474	0	Superficial_Epithelial	MA0806.1_TBX4
0	0.941137	0.77	0.474	0	Superficial_Epithelial	MA0807.1_TBX5
0	0.926349	0.704	0.383	0	Superficial_Epithelial	MA0517.1_STAT1::STAT2
0	0.893665	0.737	0.443	0	Superficial_Epithelial	MA0599.1_KLF5
0	0.860348	0.744	0.429	0	Superficial_Epithelial	MA1563.1_SOX18
0	0.845402	0.765	0.529	0	Superficial_Epithelial	MA1621.1_Rbpjl
0	0.835303	0.721	0.434	0	Superficial_Epithelial	MA0039.4_KLF4
0	0.82795	0.738	0.474	0	Superficial_Epithelial	MA0801.1_MGA
0	0.82795	0.738	0.474	0	Superficial_Epithelial	MA0803.1_TBX15
0	0.789701	0.732	0.457	0	Superficial_Epithelial	MA1566.1_TBX3
0	0.784635	0.755	0.543	0	Superficial_Epithelial	MA0830.2_TCF4
0	0.777084	0.666	0.421	0	Superficial_Epithelial	MA1509.1_IRF6
0	0.77442	0.753	0.471	0	Superficial_Epithelial	MA0782.2_PKNOX1
0	0.761427	0.705	0.428	0	Superficial_Epithelial	MA0077.1_SOX9
0	0.744206	0.727	0.46	0	Superficial_Epithelial	MA0743.2_SCRT1
0	0.740688	0.707	0.435	0	Superficial_Epithelial	MA0463.2_BCL6
0	0.711037	0.676	0.352	0	Superficial_Epithelial	MA0473.3_ELF1
0	0.710329	0.741	0.548	0	Superficial_Epithelial	MA1648.1_TCF12(var.2)
0	1.98279	0.672	0.403	0	Intermediate_Epithelial	MA0861.1_TP73
0	1.77929	0.667	0.4	0	Intermediate_Epithelial	MA0106.3_TP53
0	1.7687	0.669	0.393	0	Intermediate_Epithelial	MA0525.2_TP63
0	1.08548	0.642	0.43	0	Intermediate_Epithelial	MA1130.1_FOSL2::JUN
0	1.06597	0.644	0.431	0	Intermediate_Epithelial	MA1144.1_FOSL2::JUND
0	1.05918	0.639	0.432	0	Intermediate_Epithelial	MA1141.1_FOS::JUND
0	1.04808	0.639	0.429	0	Intermediate_Epithelial	MA1128.1_FOSL1::JUN
0	1.03604	0.643	0.43	0	Intermediate_Epithelial	MA1135.1_FOSB::JUNB
0	1.0318	0.638	0.429	0	Intermediate_Epithelial	MA1138.1_FOSL2::JUNB
0	1.00992	0.637	0.419	0	Intermediate_Epithelial	MA1142.1_FOSL1::JUND
0	0.999629	0.64	0.434	0	Intermediate_Epithelial	MA1134.1_FOS::JUNB
0	0.997547	0.636	0.43	0	Intermediate_Epithelial	MA0491.2_JUND
0	0.992859	0.638	0.433	0	Intermediate_Epithelial	MA0099.3_FOS::JUN
0	0.992615	0.634	0.426	0	Intermediate_Epithelial	MA0490.2_JUNB
0	0.99076	0.634	0.43	0	Intermediate_Epithelial	MA0477.2_FOSL1
0	0.985454	0.638	0.421	0	Intermediate_Epithelial	MA1137.1_FOSL1::JUNB
0	0.974432	0.684	0.514	0	Intermediate_Epithelial	MA1559.1_SNAI3
0	0.947894	0.629	0.433	0	Intermediate_Epithelial	MA0476.1_FOS
0	0.933695	0.677	0.519	0	Intermediate_Epithelial	MA1558.1_SNAI1
0	0.932763	0.632	0.434	0	Intermediate_Epithelial	MA1622.1_Smad2::Smad3
0	0.904886	0.625	0.415	0	Intermediate_Epithelial	MA1105.2_GRHL2
0	0.903941	0.625	0.435	0	Intermediate_Epithelial	MA0478.1_FOSL2
0	0.892326	0.624	0.435	0	Intermediate_Epithelial	MA0841.1_NFE2
0	0.884767	0.632	0.431	0	Intermediate_Epithelial	MA0655.1_JDP2
0	0.88052	0.626	0.417	0	Intermediate_Epithelial	MA0647.1_GRHL1
0	0.864052	0.624	0.432	0	Intermediate_Epithelial	MA1634.1_BATF
0	0.858496	0.623	0.431	0	Intermediate_Epithelial	MA0489.1_JUN(var.2)
0	0.85218	0.624	0.433	0	Intermediate_Epithelial	MA0462.2_BATF::JUN
0	0.843332	0.663	0.533	0	Intermediate_Epithelial	MA0103.3_ZEB1
0	0.831196	0.657	0.516	0	Intermediate_Epithelial	MA0745.2_SNAI2
0	0.795638	0.619	0.431	0	Intermediate_Epithelial	MA0835.2_BATF3
0	0.735926	0.608	0.434	0	Intermediate_Epithelial	MA1633.1_BACH1
0	0.73097	0.608	0.42	0	Intermediate_Epithelial	MA0145.3_TFCP2
0	0.703128	0.618	0.442	0	Intermediate_Epithelial	MA1101.2_BACH2
0	0.700759	0.638	0.512	0	Intermediate_Epithelial	MA0830.2_TCF4
0	0.697278	0.639	0.514	0	Intermediate_Epithelial	MA1648.1_TCF12(var.2)
0	0.689466	0.613	0.436	0	Intermediate_Epithelial	MA1132.1_JUN::JUNB
0	0.658603	0.638	0.457	0	Intermediate_Epithelial	MA0522.3_TCF3
0	0.610926	0.6	0.433	0	Intermediate_Epithelial	MA0089.2_NFE2L1
0	0.576392	0.548	0.382	0	Intermediate_Epithelial	MA0838.1_CEBPG
0	0.573774	0.541	0.38	0	Intermediate_Epithelial	MA0466.2_CEBPB
0	0.570677	0.544	0.382	0	Intermediate_Epithelial	MA0837.1_CEBPE
0	0.563193	0.591	0.433	0	Intermediate_Epithelial	MA0496.3_MAFK
0	0.464909	0.584	0.439	0	Intermediate_Epithelial	MA0501.1_MAF::NFE2
1.0184e-285	0.408067	0.542	0.435	7.59726e-283	Intermediate_Epithelial	MA1517.1_KLF6
2.02727e-279	0.296373	0.549	0.451	1.51234e-276	Intermediate_Epithelial	MA0744.2_SCRT2
6.69728e-229	0.410823	0.527	0.435	4.99617e-226	Intermediate_Epithelial	MA0493.1_Klf1
6.26232e-219	0.4315	0.584	0.498	4.67169e-216	Intermediate_Epithelial	MA1631.1_ASCL1(var.2)
5.97217e-216	0.255397	0.51	0.425	4.45524e-213	Intermediate_Epithelial	MA0836.2_CEBPD
2.60794e-209	0.339476	0.528	0.436	1.94552e-206	Intermediate_Epithelial	MA1511.1_KLF10
0	3.60644	0.882	0.469	0	Basal_Epithelial	MA0861.1_TP73
0	3.17094	0.873	0.465	0	Basal_Epithelial	MA0106.3_TP53
0	2.76977	0.852	0.467	0	Basal_Epithelial	MA0525.2_TP63
0	2.5097	0.74	0.489	0	Basal_Epithelial	MA0478.1_FOSL2
0	2.12874	0.731	0.492	0	Basal_Epithelial	MA0476.1_FOS
0	2.02476	0.74	0.488	0	Basal_Epithelial	MA0841.1_NFE2
0	1.96875	0.744	0.487	0	Basal_Epithelial	MA1101.2_BACH2
0	1.95274	0.728	0.499	0	Basal_Epithelial	MA1141.1_FOS::JUND
0	1.93017	0.728	0.495	0	Basal_Epithelial	MA1622.1_Smad2::Smad3
0	1.9009	0.733	0.498	0	Basal_Epithelial	MA0099.3_FOS::JUN
0	1.87515	0.732	0.501	0	Basal_Epithelial	MA1144.1_FOSL2::JUND
0	1.85583	0.719	0.482	0	Basal_Epithelial	MA1633.1_BACH1
0	1.84218	0.747	0.301	0	Basal_Epithelial	MA1472.1_BHLHA15(var.2)
0	1.84155	0.73	0.5	0	Basal_Epithelial	MA1135.1_FOSB::JUNB
0	1.84146	0.733	0.499	0	Basal_Epithelial	MA1134.1_FOS::JUNB
0	1.83783	0.722	0.489	0	Basal_Epithelial	MA0489.1_JUN(var.2)
0	1.83208	0.724	0.501	0	Basal_Epithelial	MA1130.1_FOSL2::JUN
0	1.77814	0.721	0.497	0	Basal_Epithelial	MA0477.2_FOSL1
0	1.77052	0.727	0.497	0	Basal_Epithelial	MA1138.1_FOSL2::JUNB
0	1.75401	0.72	0.499	0	Basal_Epithelial	MA1128.1_FOSL1::JUN
0	1.67628	0.804	0.258	0	Basal_Epithelial	MA1653.1_ZNF148
0	1.66586	0.717	0.493	0	Basal_Epithelial	MA0462.2_BATF::JUN
0	1.65786	0.717	0.492	0	Basal_Epithelial	MA1634.1_BATF
0	1.65223	0.72	0.498	0	Basal_Epithelial	MA0491.2_JUND
0	1.53007	0.72	0.496	0	Basal_Epithelial	MA0655.1_JDP2
0	1.48196	0.707	0.497	0	Basal_Epithelial	MA0490.2_JUNB
0	1.41913	0.712	0.488	0	Basal_Epithelial	MA1132.1_JUN::JUNB
0	1.41851	0.72	0.454	0	Basal_Epithelial	MA0591.1_Bach1::Mafk
0	1.40523	0.706	0.49	0	Basal_Epithelial	MA0835.2_BATF3
0	1.35881	0.783	0.4	0	Basal_Epithelial	MA0810.1_TFAP2A(var.2)
0	1.34989	0.776	0.382	0	Basal_Epithelial	MA1545.1_OVOL2
0	1.34677	0.7	0.28	0	Basal_Epithelial	MA0698.1_ZBTB18
0	1.3408	0.702	0.324	0	Basal_Epithelial	MA1467.1_ATOH1(var.2)
0	1.33391	0.735	0.342	0	Basal_Epithelial	MA0500.2_MYOG
0	1.32093	0.775	0.389	0	Basal_Epithelial	MA1544.1_OVOL1
0	1.30979	0.7	0.342	0	Basal_Epithelial	MA0816.1_Ascl2
0	1.30949	0.7	0.498	0	Basal_Epithelial	MA1137.1_FOSL1::JUNB
0	1.27939	0.716	0.344	0	Basal_Epithelial	MA1641.1_MYF5
0	1.26919	0.695	0.301	0	Basal_Epithelial	MA1618.1_Ptf1a
0	1.26392	0.692	0.476	0	Basal_Epithelial	MA0496.3_MAFK
0	1.24658	0.697	0.498	0	Basal_Epithelial	MA1142.1_FOSL1::JUND
0	1.24238	0.77	0.323	0	Basal_Epithelial	MA0528.2_ZNF263
0	1.22738	0.711	0.345	0	Basal_Epithelial	MA1619.1_Ptf1a(var.2)
0	1.22674	0.743	0.294	0	Basal_Epithelial	MA1522.1_MAZ
0	1.22574	0.758	0.422	0	Basal_Epithelial	MA1569.1_TFAP2E
0	1.21206	0.682	0.347	0	Basal_Epithelial	MA0832.1_Tcf21
0	1.15656	0.76	0.411	0	Basal_Epithelial	MA0814.2_TFAP2C(var.2)
0	1.15109	0.7	0.361	0	Basal_Epithelial	MA0048.2_NHLH1
0	1.14726	0.748	0.429	0	Basal_Epithelial	MA0811.1_TFAP2B
0	1.1384	0.755	0.325	0	Basal_Epithelial	MA1627.1_Wt1
0	5.46743	0.874	0.432	0	Epidermal_Mucous	MA0627.2_POU2F3
0	5.00748	0.86	0.44	0	Epidermal_Mucous	MA1115.1_POU5F1
0	4.83091	0.863	0.435	0	Epidermal_Mucous	MA0507.1_POU2F2
0	4.5398	0.87	0.448	0	Epidermal_Mucous	MA0789.1_POU3F4
0	3.79637	0.864	0.46	0	Epidermal_Mucous	MA0792.1_POU5F1B
0	3.71884	0.874	0.447	0	Epidermal_Mucous	MA0785.1_POU2F1
0	3.32934	0.845	0.449	0	Epidermal_Mucous	MA0787.1_POU3F2
0	3.24534	0.859	0.449	0	Epidermal_Mucous	MA0786.1_POU3F1
0	3.17219	0.846	0.452	0	Epidermal_Mucous	MA0784.1_POU1F1
0	2.62385	0.854	0.449	0	Epidermal_Mucous	MA0788.1_POU3F3
2.87969e-261	2.04296	0.827	0.418	2.14825e-258	Epidermal_Mucous	MA1483.1_ELF2
9.68274e-243	1.98799	0.805	0.411	7.22333e-240	Epidermal_Mucous	MA0641.1_ELF4
1.00211e-236	1.55063	0.828	0.432	7.47571e-234	Epidermal_Mucous	MA0846.1_FOXC2
9.35333e-230	1.52211	0.818	0.434	6.97758e-227	Epidermal_Mucous	MA0847.2_FOXD2
8.01242e-228	1.40818	0.824	0.449	5.97726e-225	Epidermal_Mucous	MA1487.1_FOXE1
1.04054e-226	1.48643	0.821	0.441	7.76242e-224	Epidermal_Mucous	MA0845.1_FOXB1
2.6321e-226	1.54442	0.813	0.425	1.96355e-223	Epidermal_Mucous	MA0851.1_Foxj3
1.33299e-223	1.52512	0.816	0.428	9.94413e-221	Epidermal_Mucous	MA1607.1_Foxl2
7.83761e-220	1.48762	0.804	0.423	5.84686e-217	Epidermal_Mucous	MA1606.1_Foxf1
5.71975e-219	1.47144	0.8	0.466	4.26693e-216	Epidermal_Mucous	MA0142.1_Pou5f1::Sox2
6.55015e-219	1.30038	0.832	0.453	4.88641e-216	Epidermal_Mucous	MA1513.1_KLF15
8.77443e-216	1.50287	0.812	0.43	6.54573e-213	Epidermal_Mucous	MA0481.3_FOXP1
1.46939e-214	1.42489	0.827	0.438	1.09617e-211	Epidermal_Mucous	MA0032.2_FOXC1
1.30113e-213	1.4885	0.804	0.426	9.70645e-211	Epidermal_Mucous	MA0042.2_FOXI1
1.30113e-213	1.4885	0.804	0.426	9.70645e-211	Epidermal_Mucous	MA0848.1_FOXO4
1.30113e-213	1.4885	0.804	0.426	9.70645e-211	Epidermal_Mucous	MA0849.1_FOXO6
1.30113e-213	1.4885	0.804	0.426	9.70645e-211	Epidermal_Mucous	MA0850.1_FOXP3
5.01073e-212	1.47545	0.812	0.442	3.738e-209	Epidermal_Mucous	MA0047.3_FOXA2
5.93604e-210	1.43817	0.804	0.433	4.42828e-207	Epidermal_Mucous	MA0852.2_FOXK1
8.31534e-210	1.44647	0.808	0.438	6.20325e-207	Epidermal_Mucous	MA1103.2_FOXK2
1.59249e-205	1.80818	0.792	0.414	1.188e-202	Epidermal_Mucous	MA0748.2_YY2
8.46532e-202	1.8957	0.781	0.414	6.31513e-199	Epidermal_Mucous	MA0136.2_ELF5
9.55216e-198	1.43364	0.791	0.448	7.12591e-195	Epidermal_Mucous	MA0613.1_FOXG1
9.55216e-198	1.43364	0.791	0.448	7.12591e-195	Epidermal_Mucous	MA0157.2_FOXO3
9.55216e-198	1.43364	0.791	0.448	7.12591e-195	Epidermal_Mucous	MA1489.1_FOXN3
1.76283e-197	1.59063	0.778	0.406	1.31507e-194	Epidermal_Mucous	MA0750.2_ZBTB7A
5.76732e-194	1.13096	0.785	0.404	4.30242e-191	Epidermal_Mucous	MA0033.2_FOXL1
2.80698e-186	1.28542	0.786	0.432	2.09401e-183	Epidermal_Mucous	MA0593.1_FOXP2
3.22079e-186	1.3221	0.779	0.436	2.40271e-183	Epidermal_Mucous	MA0030.1_FOXF2
5.52768e-185	1.46812	0.769	0.402	4.12365e-182	Epidermal_Mucous	MA0765.2_ETV5
5.84295e-180	1.29565	0.782	0.441	4.35884e-177	Epidermal_Mucous	MA1683.1_FOXA3
1.84827e-179	1.52704	0.745	0.391	1.37881e-176	Epidermal_Mucous	MA0645.1_ETV6
1.66353e-172	1.3076	0.766	0.42	1.24099e-169	Epidermal_Mucous	MA0759.1_ELK3
1.03317e-170	1.4439	0.748	0.388	7.70748e-168	Epidermal_Mucous	MA0076.2_ELK4
1.08273e-167	1.23753	0.773	0.437	8.07714e-165	Epidermal_Mucous	MA0603.1_Arntl
2.11642e-166	1.01519	0.806	0.492	1.57885e-163	Epidermal_Mucous	MA0060.3_NFYA
4.85946e-161	1.36574	0.776	0.42	3.62515e-158	Epidermal_Mucous	MA0506.1_NRF1
1.20498e-158	1.1327	0.767	0.441	8.98913e-156	Epidermal_Mucous	MA0148.4_FOXA1
1.46016e-156	1.15613	0.761	0.434	1.08928e-153	Epidermal_Mucous	MA0636.1_BHLHE41
7.3964e-156	0.972764	0.801	0.495	5.51771e-153	Epidermal_Mucous	MA1644.1_NFYC
0	8.3508	0.905	0.381	0	Hematopoietic	MA0081.2_SPIB
0	8.28108	0.915	0.395	0	Hematopoietic	MA0598.3_EHF
0	7.48912	0.922	0.385	0	Hematopoietic	MA0645.1_ETV6
0	7.47235	0.912	0.4	0	Hematopoietic	MA0640.2_ELF3
0	7.3326	0.917	0.397	0	Hematopoietic	MA0473.3_ELF1
0	6.80265	0.913	0.396	0	Hematopoietic	MA0062.3_GABPA
0	6.64158	0.915	0.396	0	Hematopoietic	MA0764.2_ETV4
0	6.53097	0.913	0.409	0	Hematopoietic	MA0136.2_ELF5
0	6.50477	0.918	0.399	0	Hematopoietic	MA0761.2_ETV1
0	6.37829	0.924	0.397	0	Hematopoietic	MA0765.2_ETV5
0	6.19818	0.9	0.382	0	Hematopoietic	MA0080.5_SPI1
0	6.19365	0.907	0.406	0	Hematopoietic	MA0641.1_ELF4
0	5.99257	0.904	0.41	0	Hematopoietic	MA0687.1_SPIC
0	5.8906	0.913	0.403	0	Hematopoietic	MA1508.1_IKZF1
0	5.86389	0.921	0.382	0	Hematopoietic	MA0076.2_ELK4
0	5.60564	0.918	0.401	0	Hematopoietic	MA0750.2_ZBTB7A
0	5.21166	0.911	0.414	0	Hematopoietic	MA1483.1_ELF2
0	4.92276	0.921	0.408	0	Hematopoietic	MA1484.1_ETS2
0	4.68818	0.919	0.403	0	Hematopoietic	MA0760.1_ERF
0	4.62897	0.916	0.402	0	Hematopoietic	MA0474.2_ERG
0	4.59154	0.915	0.403	0	Hematopoietic	MA0098.3_ETS1
0	4.46742	0.914	0.404	0	Hematopoietic	MA0156.2_FEV
0	4.4493	0.908	0.409	0	Hematopoietic	MA0762.1_ETV2
0	4.35346	0.918	0.406	0	Hematopoietic	MA0475.2_FLI1
0	4.32388	0.909	0.414	0	Hematopoietic	MA0759.1_ELK3
0	3.96547	0.877	0.444	0	Hematopoietic	MA0692.1_TFEB
0	3.81777	0.903	0.423	0	Hematopoietic	MA0028.2_ELK1
0	3.80243	0.851	0.461	0	Hematopoietic	MA0526.3_USF2
0	3.65202	0.899	0.423	0	Hematopoietic	MA0763.1_ETV3
0	3.63555	0.852	0.464	0	Hematopoietic	MA0093.3_USF1
0	3.54031	0.878	0.45	0	Hematopoietic	MA0620.3_MITF
0	3.47475	0.884	0.435	0	Hematopoietic	MA0871.2_TFEC
0	3.4413	0.878	0.411	0	Hematopoietic	MA1652.1_ZKSCAN5
0	3.34281	0.884	0.437	0	Hematopoietic	MA0831.2_TFE3
0	3.04702	0.88	0.429	0	Hematopoietic	MA0636.1_BHLHE41
0	2.73037	0.87	0.436	0	Hematopoietic	MA0664.1_MLXIPL
0	2.68163	0.854	0.41	0	Hematopoietic	MA0748.2_YY2
0	2.65903	0.877	0.433	0	Hematopoietic	MA0603.1_Arntl
0	2.57885	0.88	0.432	0	Hematopoietic	MA1464.1_ARNT2
0	2.5785	0.852	0.429	0	Hematopoietic	MA0517.1_STAT1::STAT2
0	2.55442	0.864	0.447	0	Hematopoietic	MA0828.1_SREBF2(var.2)
0	2.55016	0.868	0.432	0	Hematopoietic	MA0663.1_MLX
0	2.5271	0.856	0.428	0	Hematopoietic	MA1418.1_IRF3
0	2.44858	0.864	0.435	0	Hematopoietic	MA0464.2_BHLHE40
0	2.40345	0.853	0.409	0	Hematopoietic	MA0002.2_RUNX1
0	2.36536	0.845	0.429	0	Hematopoietic	MA0653.1_IRF9
0	2.31318	0.865	0.432	0	Hematopoietic	MA0004.1_Arnt
0	2.27911	0.83	0.429	0	Hematopoietic	MA1419.1_IRF4
0	2.27251	0.854	0.417	0	Hematopoietic	MA0511.2_RUNX2
0	2.22328	0.846	0.419	0	Hematopoietic	MA0050.2_IRF1
0	6.60173	0.97	0.315	0	Mesenchymal	MA1123.2_TWIST1
0	6.37892	0.973	0.323	0	Mesenchymal	MA0698.1_ZBTB18
0	5.56378	0.965	0.33	0	Mesenchymal	MA1638.1_HAND2
0	5.51178	0.979	0.325	0	Mesenchymal	MA1653.1_ZNF148
0	5.27526	0.966	0.341	0	Mesenchymal	MA1618.1_Ptf1a
0	5.21879	0.97	0.344	0	Mesenchymal	MA1578.1_VEZF1
0	5.1378	0.965	0.351	0	Mesenchymal	MA1472.1_BHLHA15(var.2)
0	5.01794	0.963	0.346	0	Mesenchymal	MA1642.1_NEUROG2(var.2)
0	4.77248	0.96	0.353	0	Mesenchymal	MA1109.1_NEUROD1
0	4.65387	0.971	0.344	0	Mesenchymal	MA1522.1_MAZ
0	4.63954	0.958	0.355	0	Mesenchymal	MA0091.1_TAL1::TCF3
0	4.58968	0.964	0.365	0	Mesenchymal	MA0907.1_HOXC13
0	4.51278	0.97	0.364	0	Mesenchymal	MA0471.2_E2F6
0	4.32658	0.966	0.357	0	Mesenchymal	MA0149.1_EWSR1-FLI1
0	4.25007	0.963	0.363	0	Mesenchymal	MA0753.2_ZNF740
0	4.14424	0.961	0.349	0	Mesenchymal	MA0152.1_NFATC2
0	4.00403	0.951	0.363	0	Mesenchymal	MA1467.1_ATOH1(var.2)
0	3.93463	0.964	0.376	0	Mesenchymal	MA0650.2_HOXA13
0	3.76752	0.958	0.375	0	Mesenchymal	MA1635.1_BHLHE22(var.2)
0	3.71884	0.963	0.374	0	Mesenchymal	MA1627.1_Wt1
0	3.7009	0.963	0.381	0	Mesenchymal	MA0909.2_HOXD13
0	3.58924	0.948	0.389	0	Mesenchymal	MA0723.1_VAX2
0	3.58924	0.948	0.389	0	Mesenchymal	MA0893.2_GSX2
0	3.54326	0.946	0.384	0	Mesenchymal	MA0736.1_GLIS2
0	3.53586	0.954	0.384	0	Mesenchymal	MA0500.2_MYOG
0	3.5219	0.923	0.388	0	Mesenchymal	MA0002.2_RUNX1
0	3.50295	0.945	0.39	0	Mesenchymal	MA1108.2_MXI1
0	3.49881	0.941	0.393	0	Mesenchymal	MA1468.1_ATOH7
0	3.49338	0.962	0.375	0	Mesenchymal	MA0528.2_ZNF263
0	3.48028	0.944	0.383	0	Mesenchymal	MA1619.1_Ptf1a(var.2)
0	3.44454	0.945	0.373	0	Mesenchymal	MA0606.1_NFAT5
0	3.41882	0.95	0.379	0	Mesenchymal	MA1548.1_PLAGL2
0	3.41428	0.952	0.386	0	Mesenchymal	MA0508.3_PRDM1
0	3.35481	0.94	0.377	0	Mesenchymal	MA1525.1_NFATC4
0	3.34507	0.938	0.379	0	Mesenchymal	MA0816.1_Ascl2
0	3.31415	0.944	0.405	0	Mesenchymal	MA0633.1_Twist2
0	3.31067	0.978	0.334	0	Mesenchymal	MA0151.1_Arid3a
0	3.30364	0.944	0.389	0	Mesenchymal	MA0057.1_MZF1(var.2)
0	3.26479	0.937	0.384	0	Mesenchymal	MA1641.1_MYF5
0	3.25943	0.916	0.393	0	Mesenchymal	MA1491.1_GLI3
0	3.25213	0.93	0.39	0	Mesenchymal	MA1584.1_ZIC5
0	3.22694	0.944	0.384	0	Mesenchymal	MA0163.1_PLAG1
0	3.2086	0.937	0.379	0	Mesenchymal	MA0625.1_NFATC3
0	3.20507	0.963	0.377	0	Mesenchymal	MA0033.2_FOXL1
0	3.20067	0.94	0.398	0	Mesenchymal	MA0675.1_NKX6-2
0	3.1917	0.939	0.379	0	Mesenchymal	MA0832.1_Tcf21
0	3.18477	0.911	0.394	0	Mesenchymal	MA0751.1_ZIC4
0	3.18389	0.916	0.39	0	Mesenchymal	MA0697.1_ZIC3
0	3.17422	0.949	0.399	0	Mesenchymal	MA0913.2_HOXD9
0	3.14462	0.941	0.399	0	Mesenchymal	MA0873.1_HOXD12
1.0832e-59	7.52782	0.852	0.405	8.0807e-57	Endothelial	MA0764.2_ETV4
3.47909e-61	7.39075	0.857	0.409	2.5954e-58	Endothelial	MA0761.2_ETV1
4.10784e-58	6.86161	0.852	0.406	3.06445e-55	Endothelial	MA0062.3_GABPA
8.21182e-57	6.68308	0.841	0.406	6.12601e-54	Endothelial	MA0473.3_ELF1
7.85663e-61	6.32052	0.824	0.392	5.86104e-58	Endothelial	MA0076.2_ELK4
4.43509e-55	5.98837	0.835	0.404	3.30858e-52	Endothelial	MA0598.3_EHF
4.25739e-55	5.89717	0.846	0.41	3.17601e-52	Endothelial	MA0640.2_ELF3
6.63478e-55	5.68225	0.846	0.412	4.94955e-52	Endothelial	MA1508.1_IKZF1
1.99911e-56	5.50807	0.857	0.412	1.49134e-53	Endothelial	MA0098.3_ETS1
2.32477e-55	5.48145	0.83	0.417	1.73427e-52	Endothelial	MA1484.1_ETS2
1.789e-53	5.31851	0.808	0.41	1.33459e-50	Endothelial	MA0750.2_ZBTB7A
7.90345e-56	5.27541	0.841	0.418	5.89598e-53	Endothelial	MA0762.1_ETV2
2.73328e-55	5.07994	0.857	0.411	2.03903e-52	Endothelial	MA0474.2_ERG
2.19835e-55	4.93458	0.835	0.412	1.63997e-52	Endothelial	MA0760.1_ERF
1.15521e-53	4.87166	0.819	0.406	8.61789e-51	Endothelial	MA0765.2_ETV5
1.50523e-54	4.80764	0.852	0.415	1.1229e-51	Endothelial	MA0475.2_FLI1
1.13333e-53	4.74144	0.83	0.394	8.45467e-51	Endothelial	MA0645.1_ETV6
9.34512e-55	4.6447	0.841	0.414	6.97146e-52	Endothelial	MA0156.2_FEV
6.96687e-59	4.4662	0.857	0.391	5.19728e-56	Endothelial	MA0081.2_SPIB
3.25477e-45	4.01605	0.797	0.419	2.42805e-42	Endothelial	MA0136.2_ELF5
1.49695e-57	3.7218	0.868	0.392	1.11673e-54	Endothelial	MA0080.5_SPI1
2.96439e-46	3.54352	0.797	0.424	2.21144e-43	Endothelial	MA0759.1_ELK3
2.422e-48	3.51927	0.808	0.415	1.80681e-45	Endothelial	MA0641.1_ELF4
7.57827e-46	3.35104	0.813	0.39	5.65339e-43	Endothelial	MA0149.1_EWSR1-FLI1
7.57537e-47	3.25255	0.819	0.423	5.65122e-44	Endothelial	MA1483.1_ELF2
4.40253e-46	3.11136	0.802	0.419	3.28428e-43	Endothelial	MA1652.1_ZKSCAN5
4.8688e-46	3.0986	0.824	0.432	3.63212e-43	Endothelial	MA0763.1_ETV3
3.63128e-46	3.06718	0.813	0.431	2.70894e-43	Endothelial	MA0028.2_ELK1
7.03135e-45	2.80666	0.819	0.397	5.24539e-42	Endothelial	MA0471.2_E2F6
1.56702e-45	2.7489	0.802	0.419	1.169e-42	Endothelial	MA0687.1_SPIC
2.05729e-37	2.63495	0.769	0.46	1.53474e-34	Endothelial	MA0868.2_SOX8
2.12277e-45	2.55001	0.83	0.459	1.58359e-42	Endothelial	MA0515.1_Sox6
7.0876e-44	2.38487	0.808	0.454	5.28735e-41	Endothelial	MA0686.1_SPDEF
1.18714e-40	2.30759	0.813	0.474	8.85605e-38	Endothelial	MA0077.1_SOX9
1.74165e-37	2.25739	0.769	0.36	1.29927e-34	Endothelial	MA1653.1_ZNF148
6.11954e-37	2.17546	0.78	0.378	4.56518e-34	Endothelial	MA1522.1_MAZ
1.06232e-35	2.02614	0.758	0.407	7.92493e-33	Endothelial	MA0528.2_ZNF263
9.38571e-33	1.99018	0.786	0.477	7.00174e-30	Endothelial	MA1120.1_SOX13
1.69672e-29	1.96959	0.802	0.454	1.26575e-26	Endothelial	MA0139.1_CTCF
1.14557e-35	1.94115	0.775	0.45	8.54599e-33	Endothelial	MA1152.1_SOX15
5.71015e-28	1.92068	0.742	0.418	4.25977e-25	Endothelial	MA0748.2_YY2
8.87535e-35	1.88324	0.764	0.462	6.62101e-32	Endothelial	MA0867.2_SOX4
1.33782e-37	1.79522	0.786	0.45	9.98012e-35	Endothelial	MA0514.1_Sox3
2.15338e-33	1.77754	0.742	0.378	1.60642e-30	Endothelial	MA1578.1_VEZF1
2.93899e-28	1.76908	0.753	0.456	2.19249e-25	Endothelial	MA1545.1_OVOL2
2.37213e-29	1.70629	0.758	0.475	1.76961e-26	Endothelial	MA0143.4_SOX2
5.25681e-27	1.67217	0.747	0.461	3.92158e-24	Endothelial	MA1544.1_OVOL1
2.40026e-35	1.64182	0.786	0.449	1.7906e-32	Endothelial	MA0518.1_Stat4
9.39257e-34	1.55129	0.819	0.482	7.00686e-31	Endothelial	MA1563.1_SOX18
7.65206e-31	1.54972	0.753	0.396	5.70844e-28	Endothelial	MA0753.2_ZNF740
2.8169e-71	5.27972	0.811	0.394	2.10141e-68	Metaphocyte	MA0645.1_ETV6
1.9126e-63	5.01166	0.791	0.404	1.4268e-60	Metaphocyte	MA0598.3_EHF
2.1301e-66	4.75959	0.783	0.39	1.58906e-63	Metaphocyte	MA0081.2_SPIB
5.33432e-60	4.48202	0.76	0.41	3.9794e-57	Metaphocyte	MA0640.2_ELF3
3.8004e-64	4.44985	0.787	0.418	2.8351e-61	Metaphocyte	MA0136.2_ELF5
3.80487e-71	4.40069	0.807	0.415	2.83843e-68	Metaphocyte	MA0641.1_ELF4
3.56544e-60	4.26917	0.764	0.406	2.65982e-57	Metaphocyte	MA0473.3_ELF1
7.8203e-62	4.09089	0.795	0.419	5.83395e-59	Metaphocyte	MA0687.1_SPIC
1.67856e-61	4.08272	0.772	0.405	1.2522e-58	Metaphocyte	MA0764.2_ETV4
3.26192e-68	3.99034	0.827	0.406	2.4334e-65	Metaphocyte	MA0765.2_ETV5
1.0907e-69	3.81288	0.819	0.41	8.13662e-67	Metaphocyte	MA0750.2_ZBTB7A
1.61588e-57	3.76341	0.776	0.405	1.20545e-54	Metaphocyte	MA0062.3_GABPA
1.1381e-70	3.71476	0.827	0.423	8.49024e-68	Metaphocyte	MA1483.1_ELF2
1.17181e-55	3.54995	0.783	0.408	8.74169e-53	Metaphocyte	MA0761.2_ETV1
3.4096e-67	3.54523	0.815	0.392	2.54356e-64	Metaphocyte	MA0076.2_ELK4
3.71606e-60	3.4947	0.807	0.412	2.77218e-57	Metaphocyte	MA1508.1_IKZF1
2.27423e-57	3.48091	0.783	0.391	1.69658e-54	Metaphocyte	MA0080.5_SPI1
3.62318e-66	3.16631	0.878	0.454	2.70289e-63	Metaphocyte	MA0139.1_CTCF
5.92527e-69	3.0274	0.846	0.423	4.42026e-66	Metaphocyte	MA0759.1_ELK3
3.95689e-61	2.78597	0.811	0.417	2.95184e-58	Metaphocyte	MA1484.1_ETS2
1.13293e-63	2.74963	0.823	0.413	8.45163e-61	Metaphocyte	MA0156.2_FEV
2.50349e-62	2.73117	0.811	0.412	1.8676e-59	Metaphocyte	MA0760.1_ERF
9.14085e-67	2.68844	0.827	0.431	6.81907e-64	Metaphocyte	MA0028.2_ELK1
7.76877e-60	2.63198	0.807	0.411	5.7955e-57	Metaphocyte	MA0474.2_ERG
9.56284e-64	2.55706	0.811	0.432	7.13388e-61	Metaphocyte	MA0763.1_ETV3
4.33192e-56	2.54758	0.803	0.417	3.23161e-53	Metaphocyte	MA0762.1_ETV2
9.69424e-59	2.54518	0.807	0.415	7.23191e-56	Metaphocyte	MA0475.2_FLI1
1.76003e-59	2.4601	0.815	0.412	1.31298e-56	Metaphocyte	MA0098.3_ETS1
1.26879e-54	2.41884	0.78	0.418	9.46515e-52	Metaphocyte	MA0748.2_YY2
2.46238e-60	2.18788	0.862	0.448	1.83693e-57	Metaphocyte	MA0632.2_TCFL5
1.75981e-61	2.16137	0.85	0.43	1.31282e-58	Metaphocyte	MA1650.1_ZBTB14
4.52476e-52	1.90223	0.783	0.437	3.37547e-49	Metaphocyte	MA0636.1_BHLHE41
1.47359e-52	1.88041	0.815	0.419	1.0993e-49	Metaphocyte	MA1652.1_ZKSCAN5
4.13397e-55	1.87348	0.823	0.44	3.08394e-52	Metaphocyte	MA0603.1_Arntl
7.44836e-52	1.86672	0.811	0.424	5.55648e-49	Metaphocyte	MA0506.1_NRF1
1.7125e-53	1.84852	0.823	0.442	1.27753e-50	Metaphocyte	MA0464.2_BHLHE40
7.46206e-56	1.82451	0.819	0.439	5.56669e-53	Metaphocyte	MA0004.1_Arnt
1.20182e-52	1.7987	0.803	0.44	8.96556e-50	Metaphocyte	MA1464.1_ARNT2
8.27282e-52	1.73929	0.78	0.429	6.17152e-49	Metaphocyte	MA0851.1_Foxj3
1.37843e-49	1.72205	0.807	0.44	1.02831e-46	Metaphocyte	MA0663.1_MLX
1.03248e-51	1.71982	0.811	0.444	7.70233e-49	Metaphocyte	MA0664.1_MLXIPL
1.19987e-51	1.68689	0.815	0.438	8.95104e-49	Metaphocyte	MA1099.2_HES1
9.53477e-51	1.68108	0.783	0.433	7.11294e-48	Metaphocyte	MA1607.1_Foxl2
6.2222e-56	1.67132	0.827	0.45	4.64176e-53	Metaphocyte	MA0601.1_Arid3b
8.87239e-55	1.65406	0.831	0.445	6.6188e-52	Metaphocyte	MA0845.1_FOXB1
6.59559e-54	1.61635	0.835	0.445	4.92031e-51	Metaphocyte	MA0616.2_HES2
8.92056e-53	1.61357	0.811	0.438	6.65473e-50	Metaphocyte	MA0847.2_FOXD2
1.86321e-45	1.60166	0.791	0.437	1.38996e-42	Metaphocyte	MA1102.2_CTCFL
1.98448e-55	1.60134	0.835	0.442	1.48042e-52	Metaphocyte	MA0032.2_FOXC1
6.85324e-48	1.56874	0.776	0.427	5.11252e-45	Metaphocyte	MA1606.1_Foxf1
3.5973e-93	4.71815	0.942	0.468	2.68359e-90	Pigment	MA0526.3_USF2
3.29584e-92	4.5151	0.948	0.471	2.4587e-89	Pigment	MA0093.3_USF1
3.84398e-89	3.86296	0.937	0.443	2.86761e-86	Pigment	MA0871.2_TFEC
3.62696e-87	3.47529	0.948	0.457	2.70571e-84	Pigment	MA0620.3_MITF
3.68034e-92	3.43419	0.958	0.445	2.74553e-89	Pigment	MA0831.2_TFE3
9.60104e-71	3.17864	0.916	0.418	7.16237e-68	Pigment	MA0748.2_YY2
1.73986e-73	2.99464	0.948	0.36	1.29794e-70	Pigment	MA1653.1_ZNF148
1.34442e-73	2.7968	0.906	0.417	1.00294e-70	Pigment	MA0002.2_RUNX1
5.32607e-81	2.57202	0.948	0.453	3.97325e-78	Pigment	MA0442.2_SOX10
2.37949e-74	2.5158	0.948	0.378	1.7751e-71	Pigment	MA1522.1_MAZ
5.02359e-76	2.4984	0.932	0.429	3.7476e-73	Pigment	MA0851.1_Foxj3
2.05936e-58	2.4674	0.901	0.455	1.53628e-55	Pigment	MA1545.1_OVOL2
9.07826e-75	2.43548	0.921	0.462	6.77238e-72	Pigment	MA0867.2_SOX4
5.31888e-72	2.41536	0.927	0.445	3.96788e-69	Pigment	MA0681.2_PHOX2B
1.26575e-62	2.40974	0.948	0.448	9.44251e-60	Pigment	MA0632.2_TCFL5
1.56636e-57	2.37586	0.901	0.461	1.1685e-54	Pigment	MA1544.1_OVOL1
1.17762e-45	2.3403	0.89	0.454	8.78505e-43	Pigment	MA0139.1_CTCF
3.58649e-61	2.33506	0.916	0.431	2.67552e-58	Pigment	MA1650.1_ZBTB14
5.84986e-68	2.25653	0.927	0.396	4.36399e-65	Pigment	MA0471.2_E2F6
2.20036e-59	2.18786	0.895	0.44	1.64147e-56	Pigment	MA0527.1_ZBTB33
1.70301e-75	2.18284	0.927	0.408	1.27045e-72	Pigment	MA0033.2_FOXL1
4.72207e-65	2.12536	0.921	0.436	3.52267e-62	Pigment	MA0593.1_FOXP2
2.14758e-59	2.1223	0.89	0.425	1.60209e-56	Pigment	MA0511.2_RUNX2
8.05227e-61	2.10097	0.901	0.418	6.00699e-58	Pigment	MA1651.1_ZFP42
1.44573e-64	2.06659	0.911	0.48	1.07851e-61	Pigment	MA0014.3_PAX5
2.16819e-61	2.05659	0.88	0.43	1.61747e-58	Pigment	MA0042.2_FOXI1
2.16819e-61	2.05659	0.88	0.43	1.61747e-58	Pigment	MA0848.1_FOXO4
2.16819e-61	2.05659	0.88	0.43	1.61747e-58	Pigment	MA0849.1_FOXO6
2.16819e-61	2.05659	0.88	0.43	1.61747e-58	Pigment	MA0850.1_FOXP3
1.40678e-62	2.05069	0.911	0.437	1.04946e-59	Pigment	MA0852.2_FOXK1
4.05341e-64	2.04339	0.911	0.45	3.02384e-61	Pigment	MA0514.1_Sox3
2.80728e-53	1.9822	0.89	0.439	2.09423e-50	Pigment	MA0776.1_MYBL1
1.8483e-61	1.98139	0.895	0.427	1.37883e-58	Pigment	MA1606.1_Foxf1
7.12617e-60	1.96503	0.921	0.39	5.31613e-57	Pigment	MA0149.1_EWSR1-FLI1
2.9711e-56	1.95634	0.88	0.451	2.21644e-53	Pigment	MA0613.1_FOXG1
2.9711e-56	1.95634	0.88	0.451	2.21644e-53	Pigment	MA0157.2_FOXO3
2.9711e-56	1.95634	0.88	0.451	2.21644e-53	Pigment	MA1489.1_FOXN3
3.22399e-57	1.95523	0.906	0.424	2.4051e-54	Pigment	MA0095.2_YY1
3.16808e-58	1.94741	0.895	0.451	2.36339e-55	Pigment	MA0798.2_RFX3
3.67142e-61	1.94676	0.89	0.433	2.73888e-58	Pigment	MA1607.1_Foxl2
3.37967e-64	1.93918	0.911	0.458	2.52123e-61	Pigment	MA0515.1_Sox6
1.50768e-64	1.93281	0.901	0.437	1.12473e-61	Pigment	MA0614.1_Foxj2
5.83726e-64	1.92931	0.927	0.464	4.35459e-61	Pigment	MA0660.1_MEF2B
7.98077e-57	1.92746	0.895	0.447	5.95365e-54	Pigment	MA0058.3_MAX
3.77577e-53	1.92656	0.848	0.437	2.81672e-50	Pigment	MA0636.1_BHLHE41
7.47415e-60	1.92437	0.89	0.434	5.57571e-57	Pigment	MA0481.3_FOXP1
9.08888e-66	1.91779	0.921	0.436	6.7803e-63	Pigment	MA0846.1_FOXC2
1.35812e-50	1.89752	0.89	0.424	1.01316e-47	Pigment	MA0506.1_NRF1
1.94444e-57	1.89505	0.901	0.443	1.45055e-54	Pigment	MA0084.1_SRY
6.99767e-65	1.88761	0.921	0.481	5.22026e-62	Pigment	MA0502.2_NFYB
0	6.21763	0.966	0.433	0	Unknown-1	MA0627.2_POU2F3
0	5.78998	0.951	0.441	0	Unknown-1	MA1115.1_POU5F1
0	5.61313	0.962	0.436	0	Unknown-1	MA0507.1_POU2F2
0	5.08054	0.945	0.45	0	Unknown-1	MA0789.1_POU3F4
0	4.41582	0.947	0.448	0	Unknown-1	MA0785.1_POU2F1
0	4.25185	0.944	0.461	0	Unknown-1	MA0792.1_POU5F1B
0	3.84977	0.944	0.45	0	Unknown-1	MA0787.1_POU3F2
0	3.75398	0.94	0.45	0	Unknown-1	MA0786.1_POU3F1
0	3.56199	0.929	0.453	0	Unknown-1	MA0784.1_POU1F1
1.74109e-287	2.94933	0.915	0.45	1.29885e-284	Unknown-1	MA0788.1_POU3F3
1.96066e-207	2.58545	0.845	0.416	1.46265e-204	Unknown-1	MA0136.2_ELF5
9.2435e-221	2.55918	0.852	0.391	6.89565e-218	Unknown-1	MA0645.1_ETV6
4.32225e-223	2.53611	0.867	0.407	3.2244e-220	Unknown-1	MA0750.2_ZBTB7A
3.1277e-223	2.51184	0.868	0.389	2.33327e-220	Unknown-1	MA0076.2_ELK4
3.72781e-218	2.4995	0.86	0.412	2.78095e-215	Unknown-1	MA0641.1_ELF4
2.47922e-198	2.48728	0.837	0.401	1.8495e-195	Unknown-1	MA0598.3_EHF
5.20169e-216	2.36953	0.87	0.42	3.88046e-213	Unknown-1	MA1483.1_ELF2
2.49062e-219	2.35084	0.867	0.403	1.85801e-216	Unknown-1	MA0765.2_ETV5
1.25782e-178	2.33112	0.824	0.407	9.38333e-176	Unknown-1	MA0640.2_ELF3
5.45855e-195	2.29068	0.849	0.404	4.07208e-192	Unknown-1	MA0473.3_ELF1
1.7465e-151	2.22643	0.846	0.452	1.30289e-148	Unknown-1	MA0139.1_CTCF
1.51157e-183	2.21823	0.86	0.415	1.12763e-180	Unknown-1	MA0748.2_YY2
4.03142e-186	2.08395	0.87	0.428	3.00744e-183	Unknown-1	MA1650.1_ZBTB14
2.02848e-180	2.05956	0.871	0.445	1.51324e-177	Unknown-1	MA0632.2_TCFL5
2.04166e-181	1.99648	0.83	0.402	1.52308e-178	Unknown-1	MA0764.2_ETV4
5.49804e-227	1.97197	0.894	0.467	4.10154e-224	Unknown-1	MA0142.1_Pou5f1::Sox2
1.7438e-177	1.93111	0.823	0.403	1.30088e-174	Unknown-1	MA0062.3_GABPA
3.54845e-166	1.89387	0.846	0.421	2.64714e-163	Unknown-1	MA0506.1_NRF1
3.42385e-177	1.85272	0.837	0.421	2.55419e-174	Unknown-1	MA0759.1_ELK3
3.66487e-164	1.83782	0.801	0.406	2.734e-161	Unknown-1	MA0761.2_ETV1
5.96567e-170	1.74931	0.827	0.411	4.45039e-167	Unknown-1	MA0156.2_FEV
4.83932e-169	1.74644	0.834	0.429	3.61013e-166	Unknown-1	MA0028.2_ELK1
2.94113e-170	1.73072	0.85	0.408	2.19409e-167	Unknown-1	MA0474.2_ERG
3.91295e-167	1.72159	0.846	0.412	2.91906e-164	Unknown-1	MA0475.2_FLI1
9.7273e-161	1.70621	0.824	0.414	7.25657e-158	Unknown-1	MA1484.1_ETS2
1.86622e-192	1.68998	0.868	0.455	1.3922e-189	Unknown-1	MA1513.1_KLF15
1.65252e-157	1.68792	0.805	0.409	1.23278e-154	Unknown-1	MA0760.1_ERF
1.56632e-183	1.68256	0.855	0.481	1.16848e-180	Unknown-1	MA0036.3_GATA2
9.94064e-173	1.66189	0.852	0.48	7.41572e-170	Unknown-1	MA0766.2_GATA5
1.067e-158	1.57875	0.845	0.436	7.95983e-156	Unknown-1	MA1099.2_HES1
9.66099e-156	1.572	0.823	0.429	7.2071e-153	Unknown-1	MA0763.1_ETV3
2.33896e-150	1.56698	0.822	0.415	1.74487e-147	Unknown-1	MA0762.1_ETV2
2.3696e-148	1.5622	0.785	0.388	1.76773e-145	Unknown-1	MA0081.2_SPIB
1.14309e-151	1.56164	0.813	0.409	8.52743e-149	Unknown-1	MA0098.3_ETS1
3.90875e-139	1.52487	0.8	0.44	2.91593e-136	Unknown-1	MA0464.2_BHLHE40
1.39168e-143	1.51952	0.805	0.438	1.03819e-140	Unknown-1	MA0603.1_Arntl
1.45242e-156	1.50397	0.827	0.487	1.08351e-153	Unknown-1	MA0482.2_GATA4
2.69826e-154	1.50304	0.818	0.486	2.0129e-151	Unknown-1	MA0037.3_GATA3
5.83299e-167	1.50142	0.841	0.474	4.35141e-164	Unknown-1	MA1104.2_GATA6
4.32618e-135	1.49368	0.822	0.435	3.22733e-132	Unknown-1	MA1102.2_CTCFL
1.47233e-46	3.94111	0.859	0.48	1.09836e-43	Unknown-2	MA1119.1_SIX2
2.11104e-44	3.13473	0.875	0.484	1.57483e-41	Unknown-2	MA1118.1_SIX1
6.40747e-20	2.07506	0.695	0.463	4.77997e-17	Unknown-2	MA0867.2_SOX4
4.5508e-19	2.04099	0.734	0.459	3.3949e-16	Unknown-2	MA0515.1_Sox6
4.94954e-14	1.96302	0.711	0.467	3.69236e-11	Unknown-2	MA1637.1_EBF3
4.02914e-22	1.84544	0.75	0.477	3.00574e-19	Unknown-2	MA1120.1_SOX13
2.33259e-12	1.81571	0.656	0.466	1.74012e-09	Unknown-2	MA1604.1_Ebf2
1.82123e-19	1.74774	0.711	0.451	1.35864e-16	Unknown-2	MA0514.1_Sox3
9.02459e-13	1.74758	0.641	0.458	6.73235e-10	Unknown-2	MA0154.4_EBF1
1.55754e-18	1.6832	0.766	0.475	1.16192e-15	Unknown-2	MA0077.1_SOX9
9.18547e-15	1.59604	0.664	0.461	6.85236e-12	Unknown-2	MA0868.2_SOX8
2.97851e-14	1.40051	0.68	0.454	2.22197e-11	Unknown-2	MA0442.2_SOX10
3.02468e-17	1.24015	0.75	0.475	2.25641e-14	Unknown-2	MA0143.4_SOX2
6.6121e-13	1.21117	0.695	0.482	4.93263e-10	Unknown-2	MA1563.1_SOX18
2.11744e-17	1.20563	0.766	0.451	1.57961e-14	Unknown-2	MA1152.1_SOX15
5.63284e-09	1.12842	0.578	0.361	4.2021e-06	Unknown-2	MA1653.1_ZNF148
5.27445e-15	1.11596	0.703	0.476	3.93474e-12	Unknown-2	MA1150.1_RORB
1.39695e-10	1.09681	0.586	0.379	1.04212e-07	Unknown-2	MA1522.1_MAZ
2.79177e-10	1.07124	0.656	0.473	2.08266e-07	Unknown-2	MA1562.1_SOX14
1.09612e-07	1.06311	0.594	0.419	8.17708e-05	Unknown-2	MA0748.2_YY2
4.8848e-14	1.04113	0.688	0.471	3.64406e-11	Unknown-2	MA1151.1_RORC
1.37604e-10	1.03796	0.711	0.485	1.02653e-07	Unknown-2	MA1569.1_TFAP2E
2.30059e-11	1.01303	0.648	0.417	1.71624e-08	Unknown-2	MA0508.3_PRDM1
3.02353e-09	0.990804	0.641	0.472	2.25555e-06	Unknown-2	MA0810.1_TFAP2A(var.2)
1.77791e-09	0.985116	0.656	0.493	1.32632e-06	Unknown-2	MA0599.1_KLF5
1.78576e-16	0.94767	0.766	0.478	1.33217e-13	Unknown-2	MA0631.1_Six3
1.90686e-07	0.94759	0.633	0.431	0.000142252	Unknown-2	MA1650.1_ZBTB14
4.69492e-08	0.938308	0.641	0.464	3.50241e-05	Unknown-2	MA0843.1_TEF
1.33054e-08	0.913867	0.633	0.458	9.92584e-06	Unknown-2	MA1513.1_KLF15
4.81027e-11	0.904363	0.688	0.45	3.58846e-08	Unknown-2	MA1117.1_RELB
8.9308e-13	0.902246	0.742	0.437	6.66238e-10	Unknown-2	MA0653.1_IRF9
7.7985e-12	0.888415	0.68	0.456	5.81768e-09	Unknown-2	MA0087.1_Sox5
5.2872e-11	0.86607	0.688	0.461	3.94425e-08	Unknown-2	MA0732.1_EGR3
3.85578e-11	0.864708	0.711	0.471	2.87641e-08	Unknown-2	MA0799.1_RFX4
1.22978e-11	0.864123	0.703	0.444	9.17416e-09	Unknown-2	MA0871.2_TFEC
2.34537e-10	0.863228	0.727	0.494	1.74965e-07	Unknown-2	MA0746.2_SP3
1.02755e-16	0.861968	0.797	0.471	7.66555e-14	Unknown-2	MA0093.3_USF1
5.42517e-10	0.858784	0.664	0.469	4.04717e-07	Unknown-2	MA0600.2_RFX2
4.12431e-11	0.856567	0.695	0.436	3.07674e-08	Unknown-2	MA1419.1_IRF4
1.30337e-10	0.850521	0.68	0.5	9.72316e-08	Unknown-2	MA1564.1_SP9
4.93281e-07	0.847861	0.617	0.489	0.000367988	Unknown-2	MA0811.1_TFAP2B
3.24073e-14	0.842676	0.75	0.443	2.41758e-11	Unknown-2	MA0051.1_IRF2
1.1814e-12	0.839795	0.672	0.452	8.81327e-10	Unknown-2	MA0613.1_FOXG1
1.1814e-12	0.839795	0.672	0.452	8.81327e-10	Unknown-2	MA0157.2_FOXO3
1.1814e-12	0.839795	0.672	0.452	8.81327e-10	Unknown-2	MA1489.1_FOXN3
1.67908e-08	0.83929	0.648	0.455	1.2526e-05	Unknown-2	MA0105.4_NFKB1
1.45004e-06	0.837798	0.594	0.465	0.00108173	Unknown-2	MA0639.1_DBP
1.56821e-09	0.836314	0.68	0.47	1.16989e-06	Unknown-2	MA0604.1_Atf1
1.11617e-07	0.835042	0.641	0.49	8.32663e-05	Unknown-2	MA0524.2_TFAP2C
1.3801e-09	0.833938	0.641	0.441	1.02956e-06	Unknown-2	MA0663.1_MLX
