# Supplementary material for: Common and specific gene regulatory programs in zebrafish caudal fin regeneration at single-cell resolution
Source: HighWire-hosted journal article supplement (doi:10.1101/gr.279372.124), 2025-01-01
Supplement: Supplemental_Table_S2.xlsx [file Supplemental_Table_S2.xlsx]

## Sheet: Table S2A
Supplementary Table S2. Stage DEGs identified in each cell type and GO term enrichement results of shared/dynamic modules, related to Figure 2
A. Stage DEGs in SE
gene	p_val	avg_log2FC	pct.1	pct.2	p_val_adj	comparison	category
etnk1	0	1.60042	0.938	0.658	0	Superficial_Epithelial_0dpa_vs_1dpa	DEG
txn	0	-2.26534	0.064	0.666	0	Superficial_Epithelial_0dpa_vs_1dpa	DEG
rnf213a	0	-1.43297	0.899	0.988	0	Superficial_Epithelial_0dpa_vs_1dpa	DEG
si:ch211-241e1.3	0	-2.14669	0.199	0.704	0	Superficial_Epithelial_0dpa_vs_1dpa	DEG
mxb	0	-1.34587	0.05	0.43	0	Superficial_Epithelial_0dpa_vs_1dpa	DEG
fn1b	0	-3.93954	0.061	0.816	0	Superficial_Epithelial_0dpa_vs_1dpa	DEG
fn1a	0	-2.16666	0.005	0.328	0	Superficial_Epithelial_0dpa_vs_1dpa	DEG
f5	0	-1.46398	0.004	0.336	0	Superficial_Epithelial_0dpa_vs_1dpa	DEG
si:ch211-105c13.3	0	-1.62271	0.096	0.512	0	Superficial_Epithelial_0dpa_vs_1dpa	DEG
abcb5	0	1.67809	0.951	0.768	0	Superficial_Epithelial_0dpa_vs_1dpa	DEG
papss2a	0	2.10868	0.708	0.266	0	Superficial_Epithelial_0dpa_vs_1dpa	DEG
fosl1a	0	1.42565	0.941	0.687	0	Superficial_Epithelial_0dpa_vs_1dpa	DEG
adam8a	0	-2.10931	0	0.435	0	Superficial_Epithelial_0dpa_vs_1dpa	DEG
ugt5f1	0	-1.85175	0.937	0.96	0	Superficial_Epithelial_0dpa_vs_1dpa	DEG
si:dkey-193p11.2	0	1.11825	0.999	0.99	0	Superficial_Epithelial_0dpa_vs_1dpa	DEG
cxl34c	0	-1.72926	0.002	0.391	0	Superficial_Epithelial_0dpa_vs_1dpa	DEG
eppk1	0	-2.30487	0.619	0.938	0	Superficial_Epithelial_0dpa_vs_1dpa	DEG
krt18a.1	0	-4.2493	0.1	0.963	0	Superficial_Epithelial_0dpa_vs_1dpa	DEG
gig2l	0	-3.30247	0.392	0.942	0	Superficial_Epithelial_0dpa_vs_1dpa	DEG
krt93	0	-2.57024	0.342	0.957	0	Superficial_Epithelial_0dpa_vs_1dpa	DEG
krt94	0	-2.24922	0.458	0.953	0	Superficial_Epithelial_0dpa_vs_1dpa	DEG
si:ch211-69b7.6	0	1.58376	0.997	0.929	0	Superficial_Epithelial_0dpa_vs_1dpa	DEG
ogfrl2	0	-2.78397	0.37	0.856	0	Superficial_Epithelial_0dpa_vs_1dpa	DEG
si:ch211-1a19.3	0	-1.58777	0.112	0.542	0	Superficial_Epithelial_0dpa_vs_1dpa	DEG
si:busm1-57f23.1	0	-1.4704	0.523	0.855	0	Superficial_Epithelial_0dpa_vs_1dpa	DEG
CABZ01073795.1	0	-1.80403	0.094	0.571	0	Superficial_Epithelial_0dpa_vs_1dpa	DEG
dhrs13a.2	0	1.11978	0.996	0.918	0	Superficial_Epithelial_0dpa_vs_1dpa	DEG
CT583625.5	0	-1.32795	0.07	0.474	0	Superficial_Epithelial_0dpa_vs_1dpa	DEG
pdia3	4.51182e-308	-1.49099	0.236	0.659	1.09998e-303	Superficial_Epithelial_0dpa_vs_1dpa	DEG
ezrb	8.13603e-303	0.923116	0.995	0.97	1.98357e-298	Superficial_Epithelial_0dpa_vs_1dpa	DEG
CABZ01068842.1	1.8477e-297	-1.7606	0.523	0.823	4.50469e-293	Superficial_Epithelial_0dpa_vs_1dpa	DEG
sema6bb	3.54912e-290	-1.19426	0.008	0.298	8.65275e-286	Superficial_Epithelial_0dpa_vs_1dpa	DEG
gbp1	5.39871e-290	-1.44458	0.123	0.527	1.3162e-285	Superficial_Epithelial_0dpa_vs_1dpa	DEG
hsp90b1	1.26845e-288	-1.63559	0.133	0.529	3.09249e-284	Superficial_Epithelial_0dpa_vs_1dpa	DEG
rsad2	1.18713e-286	-1.76117	0.059	0.42	2.89423e-282	Superficial_Epithelial_0dpa_vs_1dpa	DEG
oat	5.12807e-281	1.69124	0.588	0.129	1.25022e-276	Superficial_Epithelial_0dpa_vs_1dpa	DEG
cast	1.65163e-277	0.729268	0.998	0.986	4.02667e-273	Superficial_Epithelial_0dpa_vs_1dpa	DEG
TCF4	1.32891e-275	1.27333	0.875	0.574	3.23988e-271	Superficial_Epithelial_0dpa_vs_1dpa	DEG
ywhaqb	2.1646e-274	-1.31279	0.532	0.83	5.27729e-270	Superficial_Epithelial_0dpa_vs_1dpa	DEG
isg15	2.24273e-271	-1.63007	0.185	0.597	5.46777e-267	Superficial_Epithelial_0dpa_vs_1dpa	DEG
actn4	2.46178e-271	0.794737	0.995	0.987	6.00181e-267	Superficial_Epithelial_0dpa_vs_1dpa	DEG
ifi45	4.9535e-269	-1.33941	0.592	0.88	1.20766e-264	Superficial_Epithelial_0dpa_vs_1dpa	DEG
hsd17b12a	1.09157e-268	0.881084	0.994	0.949	2.66124e-264	Superficial_Epithelial_0dpa_vs_1dpa	DEG
brd2a	6.90557e-266	1.3437	0.817	0.519	1.68358e-261	Superficial_Epithelial_0dpa_vs_1dpa	DEG
atf3	1.88394e-265	1.55165	0.801	0.417	4.59305e-261	Superficial_Epithelial_0dpa_vs_1dpa	DEG
zbtb16b	1.34757e-263	1.57677	0.657	0.211	3.28539e-259	Superficial_Epithelial_0dpa_vs_1dpa	DEG
vcana	2.63815e-259	-1.18865	0.001	0.247	6.43182e-255	Superficial_Epithelial_0dpa_vs_1dpa	DEG
CR926130.1	9.99093e-259	-1.63212	0.008	0.271	2.43579e-254	Superficial_Epithelial_0dpa_vs_1dpa	DEG
zbtb16a	1.31594e-255	1.60904	0.652	0.217	3.20825e-251	Superficial_Epithelial_0dpa_vs_1dpa	DEG
marcksl1a	4.66235e-255	-1.16217	0.015	0.288	1.13668e-250	Superficial_Epithelial_0dpa_vs_1dpa	DEG
anxa1c	2.39502e-254	-1.33058	0.497	0.817	5.83905e-250	Superficial_Epithelial_0dpa_vs_1dpa	DEG
psme2	2.70129e-254	-1.16177	0.332	0.718	6.58575e-250	Superficial_Epithelial_0dpa_vs_1dpa	DEG
rnf213b	4.26691e-254	-1.29241	0.274	0.674	1.04027e-249	Superficial_Epithelial_0dpa_vs_1dpa	DEG
lsp1a	1.4538e-253	-1.32256	0.026	0.314	3.54438e-249	Superficial_Epithelial_0dpa_vs_1dpa	DEG
calr3a	1.50956e-252	-1.33997	0.182	0.567	3.6803e-248	Superficial_Epithelial_0dpa_vs_1dpa	DEG
ly6m2	1.01153e-251	-1.08734	0.006	0.259	2.4661e-247	Superficial_Epithelial_0dpa_vs_1dpa	DEG
icn2	4.58325e-247	0.860027	0.987	0.905	1.1174e-242	Superficial_Epithelial_0dpa_vs_1dpa	DEG
ppib	3.79089e-246	-1.25197	0.202	0.579	9.24219e-242	Superficial_Epithelial_0dpa_vs_1dpa	DEG
dhx58	3.27661e-242	-1.35982	0.115	0.473	7.98837e-238	Superficial_Epithelial_0dpa_vs_1dpa	DEG
lrp1ab	6.53704e-239	-1.42254	0.096	0.441	1.59373e-234	Superficial_Epithelial_0dpa_vs_1dpa	DEG
lsp1b	3.76144e-237	-1.39891	0.053	0.353	9.17038e-233	Superficial_Epithelial_0dpa_vs_1dpa	DEG
ctsla	3.08172e-227	-1.5978	0.096	0.418	7.51324e-223	Superficial_Epithelial_0dpa_vs_1dpa	DEG
calr3b	3.30019e-226	-1.11653	0.063	0.369	8.04585e-222	Superficial_Epithelial_0dpa_vs_1dpa	DEG
mxi1	9.55826e-226	-1.21097	0.35	0.702	2.3303e-221	Superficial_Epithelial_0dpa_vs_1dpa	DEG
traf4a	4.91026e-222	1.38786	0.797	0.497	1.19712e-217	Superficial_Epithelial_0dpa_vs_1dpa	DEG
specc1	1.22734e-220	0.973597	0.963	0.851	2.99225e-216	Superficial_Epithelial_0dpa_vs_1dpa	DEG
fhod1	7.48752e-218	1.38975	0.72	0.378	1.82546e-213	Superficial_Epithelial_0dpa_vs_1dpa	DEG
mcl1a	2.68916e-217	0.728645	0.987	0.949	6.55618e-213	Superficial_Epithelial_0dpa_vs_1dpa	DEG
CU984600.2	8.89555e-217	-1.13799	0.451	0.784	2.16874e-212	Superficial_Epithelial_0dpa_vs_1dpa	DEG
hyou1	2.9979e-216	-1.29687	0.104	0.427	7.30888e-212	Superficial_Epithelial_0dpa_vs_1dpa	DEG
sqstm1	1.50783e-215	0.944423	0.928	0.741	3.67608e-211	Superficial_Epithelial_0dpa_vs_1dpa	DEG
spns2	2.73819e-215	-1.03484	0.758	0.937	6.67571e-211	Superficial_Epithelial_0dpa_vs_1dpa	DEG
si:ch211-153b23.5	3.64788e-213	-1.97632	0.235	0.587	8.89353e-209	Superficial_Epithelial_0dpa_vs_1dpa	DEG
pard6b	1.28189e-210	1.21856	0.732	0.383	3.12524e-206	Superficial_Epithelial_0dpa_vs_1dpa	DEG
tap1	3.58044e-210	-1.1188	0.178	0.53	8.72911e-206	Superficial_Epithelial_0dpa_vs_1dpa	DEG
si:ch211-207d6.2	6.16409e-210	-1.20353	0.377	0.708	1.50281e-205	Superficial_Epithelial_0dpa_vs_1dpa	DEG
lmo7a	1.21157e-209	0.613047	0.999	0.983	2.9538e-205	Superficial_Epithelial_0dpa_vs_1dpa	DEG
sp8a	4.3414e-209	-1.1929	0.261	0.624	1.05843e-204	Superficial_Epithelial_0dpa_vs_1dpa	DEG
zgc:152670	1.07577e-208	-1.48002	0.412	0.756	2.62274e-204	Superficial_Epithelial_0dpa_vs_1dpa	DEG
sult2st3	2.48825e-208	2.57568	0.658	0.309	6.06635e-204	Superficial_Epithelial_0dpa_vs_1dpa	DEG
psme1	3.70878e-208	-1.04282	0.171	0.522	9.042e-204	Superficial_Epithelial_0dpa_vs_1dpa	DEG
hspa5	9.91238e-208	-1.43523	0.463	0.764	2.41664e-203	Superficial_Epithelial_0dpa_vs_1dpa	DEG
nt5e	6.28587e-207	2.05449	0.402	0.036	1.5325e-202	Superficial_Epithelial_0dpa_vs_1dpa	DEG
canx	1.67044e-206	-1.09248	0.385	0.706	4.07253e-202	Superficial_Epithelial_0dpa_vs_1dpa	DEG
zgc:193505	4.89337e-206	0.678941	0.999	0.99	1.193e-201	Superficial_Epithelial_0dpa_vs_1dpa	DEG
gig2d	4.0831e-205	-0.851028	0.022	0.264	9.95459e-201	Superficial_Epithelial_0dpa_vs_1dpa	DEG
si:ch73-338o16.4	1.42133e-204	-1.36689	0.657	0.835	3.4652e-200	Superficial_Epithelial_0dpa_vs_1dpa	DEG
krt17	2.39148e-204	-1.69404	0.42	0.745	5.83043e-200	Superficial_Epithelial_0dpa_vs_1dpa	DEG
asap3	3.24945e-204	-1.13059	0.206	0.554	7.92217e-200	Superficial_Epithelial_0dpa_vs_1dpa	DEG
slc26a2	6.91717e-203	1.93482	0.524	0.156	1.68641e-198	Superficial_Epithelial_0dpa_vs_1dpa	DEG
si:dkeyp-9d4.2	1.3499e-202	-0.905712	0.021	0.259	3.29105e-198	Superficial_Epithelial_0dpa_vs_1dpa	DEG
frmd4ba	1.83398e-201	0.873318	0.949	0.852	4.47124e-197	Superficial_Epithelial_0dpa_vs_1dpa	DEG
tmem176l.4	4.60431e-201	-0.965209	0.652	0.903	1.12253e-196	Superficial_Epithelial_0dpa_vs_1dpa	DEG
pnp5a	3.49308e-200	1.11039	0.861	0.594	8.51613e-196	Superficial_Epithelial_0dpa_vs_1dpa	DEG
ggps1	9.47982e-196	1.10704	0.749	0.45	2.31118e-191	Superficial_Epithelial_0dpa_vs_1dpa	DEG
smtnb	8.8341e-195	-0.723946	0.017	0.24	2.15375e-190	Superficial_Epithelial_0dpa_vs_1dpa	DEG
mdka	1.04854e-194	-1.31171	0.023	0.255	2.55634e-190	Superficial_Epithelial_0dpa_vs_1dpa	DEG
si:ch211-232i5.1	4.43792e-194	0.891576	0.907	0.702	1.08197e-189	Superficial_Epithelial_0dpa_vs_1dpa	DEG
psmb1	2.16873e-192	-1.0046	0.268	0.61	5.28737e-188	Superficial_Epithelial_0dpa_vs_1dpa	DEG
ier2b	6.72337e-188	0.766699	0.966	0.872	1.63916e-183	Superficial_Epithelial_0dpa_vs_1dpa	DEG
dad1	1.98469e-185	-1.01514	0.22	0.549	4.83867e-181	Superficial_Epithelial_0dpa_vs_1dpa	DEG
spink2.1	2.6988e-184	1.32839	0.631	0.28	6.57966e-180	Superficial_Epithelial_0dpa_vs_1dpa	DEG
jupa	1.00858e-182	0.712396	0.991	0.98	2.45891e-178	Superficial_Epithelial_0dpa_vs_1dpa	DEG
si:ch211-209n20.1	1.90661e-182	-1.13391	0.262	0.586	4.64831e-178	Superficial_Epithelial_0dpa_vs_1dpa	DEG
gig2h	2.31262e-181	-0.824673	0.022	0.241	5.63816e-177	Superficial_Epithelial_0dpa_vs_1dpa	DEG
pdia6	2.89969e-180	-1.08079	0.111	0.407	7.06943e-176	Superficial_Epithelial_0dpa_vs_1dpa	DEG
vmp1	1.17601e-179	-1.46952	0.159	0.458	2.86712e-175	Superficial_Epithelial_0dpa_vs_1dpa	DEG
ifi46	1.40815e-179	-1.0499	0.179	0.498	3.43307e-175	Superficial_Epithelial_0dpa_vs_1dpa	DEG
arg2	2.63148e-179	1.13971	0.673	0.328	6.41555e-175	Superficial_Epithelial_0dpa_vs_1dpa	DEG
cav1	1.60518e-178	1.10691	0.533	0.168	3.91344e-174	Superficial_Epithelial_0dpa_vs_1dpa	DEG
ampd3b	7.88574e-178	1.1931	0.812	0.55	1.92254e-173	Superficial_Epithelial_0dpa_vs_1dpa	DEG
anxa11a	9.36449e-178	1.13537	0.945	0.864	2.28306e-173	Superficial_Epithelial_0dpa_vs_1dpa	DEG
actb1	1.13369e-177	0.770889	0.977	0.963	2.76394e-173	Superficial_Epithelial_0dpa_vs_1dpa	DEG
banf1	6.57867e-177	-1.03735	0.251	0.576	1.60388e-172	Superficial_Epithelial_0dpa_vs_1dpa	DEG
aldob	2.98101e-172	1.24063	0.466	0.125	7.26771e-168	Superficial_Epithelial_0dpa_vs_1dpa	DEG
s100a10b	4.56063e-172	-0.814689	0.866	0.942	1.11188e-167	Superficial_Epithelial_0dpa_vs_1dpa	DEG
sb:cb1058	1.65949e-171	-0.695391	0.005	0.183	4.04584e-167	Superficial_Epithelial_0dpa_vs_1dpa	DEG
myh14	7.38444e-171	-1.00696	0.511	0.79	1.80033e-166	Superficial_Epithelial_0dpa_vs_1dpa	DEG
rsrp1	1.01223e-170	0.734085	0.947	0.788	2.46782e-166	Superficial_Epithelial_0dpa_vs_1dpa	DEG
parp12a	2.66504e-170	-0.858595	0.055	0.305	6.49736e-166	Superficial_Epithelial_0dpa_vs_1dpa	DEG
cyldb	4.26182e-169	1.01611	0.662	0.317	1.03903e-164	Superficial_Epithelial_0dpa_vs_1dpa	DEG
cd63	1.95363e-165	-0.952437	0.55	0.79	4.76296e-161	Superficial_Epithelial_0dpa_vs_1dpa	DEG
gig2e	5.73784e-165	-0.838916	0.049	0.288	1.39889e-160	Superficial_Epithelial_0dpa_vs_1dpa	DEG
zgc:194655	8.25716e-165	-0.826101	0.028	0.24	2.0131e-160	Superficial_Epithelial_0dpa_vs_1dpa	DEG
ascl1b	1.09219e-164	-0.852351	0.105	0.391	2.66277e-160	Superficial_Epithelial_0dpa_vs_1dpa	DEG
epha7	9.0204e-164	-1.12468	0.091	0.361	2.19917e-159	Superficial_Epithelial_0dpa_vs_1dpa	DEG
pdia4	5.32374e-162	-1.03196	0.075	0.33	1.29793e-157	Superficial_Epithelial_0dpa_vs_1dpa	DEG
ptp4a2b	5.90481e-162	0.975847	0.824	0.631	1.43959e-157	Superficial_Epithelial_0dpa_vs_1dpa	DEG
nckap5l	7.1068e-161	-0.654846	0.03	0.243	1.73264e-156	Superficial_Epithelial_0dpa_vs_1dpa	DEG
cyp8b2	3.54974e-160	1.26641	0.412	0.082	8.65425e-156	Superficial_Epithelial_0dpa_vs_1dpa	DEG
usp54a	6.09204e-160	1.01174	0.81	0.593	1.48524e-155	Superficial_Epithelial_0dpa_vs_1dpa	DEG
krt15	1.68784e-159	1.64218	0.76	0.475	4.11496e-155	Superficial_Epithelial_0dpa_vs_1dpa	DEG
si:dkey-79f11.10	3.67624e-159	-0.922246	0.017	0.207	8.96268e-155	Superficial_Epithelial_0dpa_vs_1dpa	DEG
tfpia	4.37664e-157	-1.08651	0.069	0.31	1.06703e-152	Superficial_Epithelial_0dpa_vs_1dpa	DEG
fbxl3a	4.57267e-157	-0.625639	0.024	0.222	1.11482e-152	Superficial_Epithelial_0dpa_vs_1dpa	DEG
palld	5.85099e-156	-0.844546	0.026	0.224	1.42647e-151	Superficial_Epithelial_0dpa_vs_1dpa	DEG
fas	6.72452e-156	-0.806385	0.084	0.343	1.63944e-151	Superficial_Epithelial_0dpa_vs_1dpa	DEG
pkz	2.58398e-155	-0.776776	0.074	0.327	6.29975e-151	Superficial_Epithelial_0dpa_vs_1dpa	DEG
slc7a3b	3.11169e-155	1.10646	0.593	0.274	7.58631e-151	Superficial_Epithelial_0dpa_vs_1dpa	DEG
itga5	6.3606e-155	-0.875489	0.004	0.164	1.55072e-150	Superficial_Epithelial_0dpa_vs_1dpa	DEG
s1pr5b	8.18768e-155	-0.473711	0.004	0.164	1.99616e-150	Superficial_Epithelial_0dpa_vs_1dpa	DEG
ccl19a.1	1.12685e-154	-2.02155	0.063	0.3	2.74726e-150	Superficial_Epithelial_0dpa_vs_1dpa	DEG
gdpd2	2.62158e-152	1.82944	0.475	0.17	6.39141e-148	Superficial_Epithelial_0dpa_vs_1dpa	DEG
FP236157.7	8.62709e-152	1.2399	0.707	0.434	2.10328e-147	Superficial_Epithelial_0dpa_vs_1dpa	DEG
ccl27a	9.6962e-152	-1.05468	0.212	0.507	2.36393e-147	Superficial_Epithelial_0dpa_vs_1dpa	DEG
tmprss4a	1.06656e-151	-0.957822	0.587	0.832	2.60027e-147	Superficial_Epithelial_0dpa_vs_1dpa	DEG
pkp3a	1.32693e-151	0.595823	0.999	0.994	3.23506e-147	Superficial_Epithelial_0dpa_vs_1dpa	DEG
si:ch211-214p13.3	2.32001e-151	-0.933225	0.086	0.342	5.65618e-147	Superficial_Epithelial_0dpa_vs_1dpa	DEG
CABZ01079267.1	3.92329e-150	0.818433	0.861	0.661	9.56499e-146	Superficial_Epithelial_0dpa_vs_1dpa	DEG
zgc:92242	7.25318e-150	0.639516	0.985	0.917	1.76832e-145	Superficial_Epithelial_0dpa_vs_1dpa	DEG
LECT2	1.35898e-147	-0.70267	0.039	0.248	3.31319e-143	Superficial_Epithelial_0dpa_vs_1dpa	DEG
mxa	1.37309e-146	-0.84752	0.144	0.426	3.34759e-142	Superficial_Epithelial_0dpa_vs_1dpa	DEG
krt91	2.58253e-146	0.632302	0.988	0.953	6.29621e-142	Superficial_Epithelial_0dpa_vs_1dpa	DEG
sparc	8.77195e-146	-1.31181	0.065	0.293	2.1386e-141	Superficial_Epithelial_0dpa_vs_1dpa	DEG
hk2	9.38948e-146	0.71313	0.914	0.799	2.28916e-141	Superficial_Epithelial_0dpa_vs_1dpa	DEG
zgc:162944	2.58579e-144	-0.888495	0.331	0.627	6.30416e-140	Superficial_Epithelial_0dpa_vs_1dpa	DEG
tmsb4x	4.20905e-144	-1.40685	0.33	0.593	1.02617e-139	Superficial_Epithelial_0dpa_vs_1dpa	DEG
calr	5.53582e-144	-0.664954	0.032	0.231	1.34963e-139	Superficial_Epithelial_0dpa_vs_1dpa	DEG
elf1	7.31832e-143	0.708535	0.927	0.824	1.78421e-138	Superficial_Epithelial_0dpa_vs_1dpa	DEG
cnga2b	2.3769e-139	1.01081	0.528	0.211	5.79489e-135	Superficial_Epithelial_0dpa_vs_1dpa	DEG
baiap2a	5.51398e-139	0.624961	0.98	0.914	1.34431e-134	Superficial_Epithelial_0dpa_vs_1dpa	DEG
zgc:195173	8.53319e-139	-0.697513	0.036	0.233	2.08039e-134	Superficial_Epithelial_0dpa_vs_1dpa	DEG
EGFP	5.62798e-137	-0.64596	0.038	0.237	1.3721e-132	Superficial_Epithelial_0dpa_vs_1dpa	DEG
zgc:162730	6.18845e-137	0.930703	0.897	0.745	1.50874e-132	Superficial_Epithelial_0dpa_vs_1dpa	DEG
zgc:152791	8.87943e-137	-0.747514	0.851	0.941	2.1648e-132	Superficial_Epithelial_0dpa_vs_1dpa	DEG
psmb3	1.08104e-135	-0.827579	0.219	0.503	2.63558e-131	Superficial_Epithelial_0dpa_vs_1dpa	DEG
ssr3	1.6675e-135	-0.873494	0.195	0.472	4.06536e-131	Superficial_Epithelial_0dpa_vs_1dpa	DEG
postnb	4.60115e-135	-1.18884	0.041	0.237	1.12176e-130	Superficial_Epithelial_0dpa_vs_1dpa	DEG
plxna2	5.81211e-135	-0.67798	0.007	0.155	1.41699e-130	Superficial_Epithelial_0dpa_vs_1dpa	DEG
mov10b.1	7.43566e-135	-0.781359	0.099	0.347	1.81281e-130	Superficial_Epithelial_0dpa_vs_1dpa	DEG
zgc:173729	9.96392e-135	-0.87705	0.071	0.293	2.4292e-130	Superficial_Epithelial_0dpa_vs_1dpa	DEG
tpm4a	2.3605e-134	-0.668224	0.011	0.167	5.75489e-130	Superficial_Epithelial_0dpa_vs_1dpa	DEG
lifrb	1.84903e-133	-1.10806	0.052	0.256	4.50794e-129	Superficial_Epithelial_0dpa_vs_1dpa	DEG
si:dkey-28b4.7	2.13828e-133	-0.771221	0.089	0.328	5.21314e-129	Superficial_Epithelial_0dpa_vs_1dpa	DEG
vwa1	2.54637e-133	-0.9767	0.035	0.221	6.20806e-129	Superficial_Epithelial_0dpa_vs_1dpa	DEG
lipg	8.87787e-132	0.934222	0.511	0.201	2.16442e-127	Superficial_Epithelial_0dpa_vs_1dpa	DEG
rps6ka3b	9.44031e-132	-1.03308	0.29	0.566	2.30155e-127	Superficial_Epithelial_0dpa_vs_1dpa	DEG
ednrbb	1.00003e-131	-0.76124	0.021	0.19	2.43806e-127	Superficial_Epithelial_0dpa_vs_1dpa	DEG
eef1a1l1	2.40494e-131	0.510393	0.991	0.964	5.86324e-127	Superficial_Epithelial_0dpa_vs_1dpa	DEG
her9	2.14701e-130	-1.19893	0.346	0.609	5.23442e-126	Superficial_Epithelial_0dpa_vs_1dpa	DEG
nfixb	2.4526e-130	0.998549	0.634	0.357	5.97943e-126	Superficial_Epithelial_0dpa_vs_1dpa	DEG
ptgdsb.1	2.15946e-129	1.11188	0.242	0.002	5.26477e-125	Superficial_Epithelial_0dpa_vs_1dpa	DEG
elovl1b	2.77994e-129	-0.868096	0.172	0.442	6.77749e-125	Superficial_Epithelial_0dpa_vs_1dpa	DEG
dynll1	5.33987e-129	-0.912684	0.282	0.558	1.30186e-124	Superficial_Epithelial_0dpa_vs_1dpa	DEG
mt-cyb	6.25742e-128	-0.421246	0.999	1	1.52556e-123	Superficial_Epithelial_0dpa_vs_1dpa	DEG
ddost	2.04178e-127	-0.742414	0.127	0.379	4.97787e-123	Superficial_Epithelial_0dpa_vs_1dpa	DEG
tdrd7b	1.03612e-126	-0.756462	0.091	0.325	2.52607e-122	Superficial_Epithelial_0dpa_vs_1dpa	DEG
robo1	6.71172e-126	-1.03714	0.102	0.334	1.63632e-121	Superficial_Epithelial_0dpa_vs_1dpa	DEG
rasgef1bb	1.22571e-125	-0.81706	0.159	0.421	2.98829e-121	Superficial_Epithelial_0dpa_vs_1dpa	DEG
fabp11a	2.02149e-125	-0.548325	0	0.122	4.9284e-121	Superficial_Epithelial_0dpa_vs_1dpa	DEG
col7a1	8.05349e-125	-0.933648	0.013	0.161	1.96344e-120	Superficial_Epithelial_0dpa_vs_1dpa	DEG
mycbp2	1.55934e-124	0.770298	0.79	0.566	3.80167e-120	Superficial_Epithelial_0dpa_vs_1dpa	DEG
psma2	6.09333e-124	-0.671261	0.095	0.329	1.48555e-119	Superficial_Epithelial_0dpa_vs_1dpa	DEG
psma3	9.25144e-124	-0.791134	0.184	0.449	2.2555e-119	Superficial_Epithelial_0dpa_vs_1dpa	DEG
ifi35	1.2173e-123	-0.822346	0.363	0.636	2.96777e-119	Superficial_Epithelial_0dpa_vs_1dpa	DEG
si:ch211-219a4.3	1.83569e-123	-0.809523	0.508	0.74	4.47541e-119	Superficial_Epithelial_0dpa_vs_1dpa	DEG
xaf1	5.15911e-123	-0.761196	0.17	0.439	1.25779e-118	Superficial_Epithelial_0dpa_vs_1dpa	DEG
hmox1a	2.59246e-122	-0.728406	0.013	0.161	6.32043e-118	Superficial_Epithelial_0dpa_vs_1dpa	DEG
zgc:194101	4.11739e-122	-1.25477	0.095	0.32	1.00382e-117	Superficial_Epithelial_0dpa_vs_1dpa	DEG
lgals17	8.18777e-121	-0.60329	0.033	0.211	1.99618e-116	Superficial_Epithelial_0dpa_vs_1dpa	DEG
alas1	1.1986e-120	0.78578	0.795	0.582	2.9222e-116	Superficial_Epithelial_0dpa_vs_1dpa	DEG
jag1a	1.47903e-120	-0.878567	0.022	0.18	3.60586e-116	Superficial_Epithelial_0dpa_vs_1dpa	DEG
klf3	2.51661e-120	0.932159	0.691	0.437	6.1355e-116	Superficial_Epithelial_0dpa_vs_1dpa	DEG
ywhaqa	5.17621e-120	-0.814547	0.138	0.379	1.26196e-115	Superficial_Epithelial_0dpa_vs_1dpa	DEG
nppc	8.06906e-120	-0.568518	0.001	0.12	1.96724e-115	Superficial_Epithelial_0dpa_vs_1dpa	DEG
sts	1.25246e-119	1.04762	0.293	0.041	3.05349e-115	Superficial_Epithelial_0dpa_vs_1dpa	DEG
gnai2a	5.82606e-119	-0.806646	0.416	0.672	1.42039e-114	Superficial_Epithelial_0dpa_vs_1dpa	DEG
perp	1.52812e-118	-0.478334	0.998	0.997	3.72556e-114	Superficial_Epithelial_0dpa_vs_1dpa	DEG
fosl2	3.52902e-118	0.918866	0.674	0.43	8.60376e-114	Superficial_Epithelial_0dpa_vs_1dpa	DEG
egr1	4.80145e-118	1.18068	0.407	0.135	1.17059e-113	Superficial_Epithelial_0dpa_vs_1dpa	DEG
dnajc3b	4.87302e-117	-0.778038	0.146	0.393	1.18804e-112	Superficial_Epithelial_0dpa_vs_1dpa	DEG
egr2a	1.61497e-116	0.939489	0.312	0.058	3.93731e-112	Superficial_Epithelial_0dpa_vs_1dpa	DEG
dnajb11	2.71794e-116	-0.644801	0.076	0.286	6.62634e-112	Superficial_Epithelial_0dpa_vs_1dpa	DEG
manf	6.79352e-116	-0.701978	0.095	0.316	1.65626e-111	Superficial_Epithelial_0dpa_vs_1dpa	DEG
tnks1bp1	1.21197e-115	0.589816	0.973	0.935	2.95479e-111	Superficial_Epithelial_0dpa_vs_1dpa	DEG
cfl1l	2.55336e-115	-0.557892	0.92	0.961	6.2251e-111	Superficial_Epithelial_0dpa_vs_1dpa	DEG
atxn1a	2.66132e-115	0.95256	0.685	0.446	6.48829e-111	Superficial_Epithelial_0dpa_vs_1dpa	DEG
ahnak	3.07904e-115	0.384738	0.999	0.997	7.50669e-111	Superficial_Epithelial_0dpa_vs_1dpa	DEG
sorcs2	5.17628e-115	-1.06044	0.144	0.382	1.26198e-110	Superficial_Epithelial_0dpa_vs_1dpa	DEG
pomp	1.5928e-114	-0.77306	0.184	0.439	3.88325e-110	Superficial_Epithelial_0dpa_vs_1dpa	DEG
rai14	1.749e-114	-0.520862	0.014	0.155	4.26407e-110	Superficial_Epithelial_0dpa_vs_1dpa	DEG
cyp8b3	3.04225e-114	1.09896	0.297	0.05	7.417e-110	Superficial_Epithelial_0dpa_vs_1dpa	DEG
usp18	5.74039e-114	-0.642293	0.052	0.239	1.39951e-109	Superficial_Epithelial_0dpa_vs_1dpa	DEG
psmb9a	7.19116e-113	-0.635715	0.074	0.279	1.7532e-108	Superficial_Epithelial_0dpa_vs_1dpa	DEG
cpne1	2.06223e-112	-0.778786	0.241	0.499	5.02772e-108	Superficial_Epithelial_0dpa_vs_1dpa	DEG
epsti1	1.1123e-111	-0.798857	0.259	0.529	2.71179e-107	Superficial_Epithelial_0dpa_vs_1dpa	DEG
metrnla	2.37213e-111	-0.494561	0.013	0.149	5.78326e-107	Superficial_Epithelial_0dpa_vs_1dpa	DEG
bbox1	4.31486e-111	1.15027	0.496	0.232	1.05196e-106	Superficial_Epithelial_0dpa_vs_1dpa	DEG
si:ch211-153b23.3	4.44994e-111	-1.49759	0.015	0.157	1.0849e-106	Superficial_Epithelial_0dpa_vs_1dpa	DEG
afdna	8.89628e-111	0.532509	0.969	0.906	2.16891e-106	Superficial_Epithelial_0dpa_vs_1dpa	DEG
igsf3	3.63895e-110	-0.534303	0.005	0.127	8.87176e-106	Superficial_Epithelial_0dpa_vs_1dpa	DEG
slc23a2	4.40188e-110	1.04906	0.526	0.272	1.07318e-105	Superficial_Epithelial_0dpa_vs_1dpa	DEG
atp5mc1	6.14399e-110	-0.667563	0.129	0.364	1.4979e-105	Superficial_Epithelial_0dpa_vs_1dpa	DEG
ywhaz	1.1015e-109	-0.810979	0.596	0.769	2.68546e-105	Superficial_Epithelial_0dpa_vs_1dpa	DEG
kif26ab	2.7112e-109	0.633854	0.935	0.803	6.6099e-105	Superficial_Epithelial_0dpa_vs_1dpa	DEG
ftr83	8.00967e-109	0.78907	0.843	0.692	1.95276e-104	Superficial_Epithelial_0dpa_vs_1dpa	DEG
ctsba	1.48268e-108	-0.773944	0.45	0.694	3.61478e-104	Superficial_Epithelial_0dpa_vs_1dpa	DEG
ppp1r10	3.09499e-108	0.826625	0.646	0.406	7.54558e-104	Superficial_Epithelial_0dpa_vs_1dpa	DEG
nuggc.3	5.61587e-108	-0.938951	0.26	0.509	1.36915e-103	Superficial_Epithelial_0dpa_vs_1dpa	DEG
tnnt3b	1.38769e-107	-0.494188	0.012	0.142	3.38318e-103	Superficial_Epithelial_0dpa_vs_1dpa	DEG
cd81a	1.73347e-107	-0.712885	0.009	0.135	4.22621e-103	Superficial_Epithelial_0dpa_vs_1dpa	DEG
zgc:154093	2.02301e-107	-0.407325	0.006	0.126	4.9321e-103	Superficial_Epithelial_0dpa_vs_1dpa	DEG
si:dkey-79d12.5	5.99848e-107	0.869402	0.705	0.504	1.46243e-102	Superficial_Epithelial_0dpa_vs_1dpa	DEG
cmtm6	2.07238e-106	-0.751135	0.239	0.494	5.05246e-102	Superficial_Epithelial_0dpa_vs_1dpa	DEG
mat2ab	3.32336e-106	0.861738	0.369	0.117	8.10236e-102	Superficial_Epithelial_0dpa_vs_1dpa	DEG
nlrc5	3.75173e-106	-0.7115	0.071	0.264	9.14671e-102	Superficial_Epithelial_0dpa_vs_1dpa	DEG
serpinb14	6.50096e-106	0.877576	0.701	0.488	1.58493e-101	Superficial_Epithelial_0dpa_vs_1dpa	DEG
chac1	1.32382e-105	0.548719	0.969	0.906	3.22746e-101	Superficial_Epithelial_0dpa_vs_1dpa	DEG
etv4	1.32746e-105	-0.380988	0.007	0.129	3.23635e-101	Superficial_Epithelial_0dpa_vs_1dpa	DEG
c2cd2l	3.41093e-105	-0.852643	0.198	0.446	8.31586e-101	Superficial_Epithelial_0dpa_vs_1dpa	DEG
psma4	6.24479e-105	-0.695487	0.176	0.42	1.52248e-100	Superficial_Epithelial_0dpa_vs_1dpa	DEG
CABZ01072077.1	6.50764e-105	0.934113	0.287	0.053	1.58656e-100	Superficial_Epithelial_0dpa_vs_1dpa	DEG
ier2a	1.42722e-104	0.80059	0.613	0.361	3.47956e-100	Superficial_Epithelial_0dpa_vs_1dpa	DEG
cavin2a	2.27752e-104	0.760174	0.58	0.311	5.5526e-100	Superficial_Epithelial_0dpa_vs_1dpa	DEG
zmp:0000000912	5.92088e-104	-0.558325	0.041	0.209	1.44351e-99	Superficial_Epithelial_0dpa_vs_1dpa	DEG
angptl4	1.38513e-103	-0.904452	0.093	0.292	3.37695e-99	Superficial_Epithelial_0dpa_vs_1dpa	DEG
irg1l	1.89488e-103	-1.3926	0.023	0.168	4.61972e-99	Superficial_Epithelial_0dpa_vs_1dpa	DEG
casz1	2.23877e-103	0.66174	0.799	0.612	5.45812e-99	Superficial_Epithelial_0dpa_vs_1dpa	DEG
si:ch211-39f2.3	1.99193e-102	-1.20371	0.165	0.391	4.85631e-98	Superficial_Epithelial_0dpa_vs_1dpa	DEG
CR383676.2	2.66438e-102	0.387319	0.961	0.957	6.49576e-98	Superficial_Epithelial_0dpa_vs_1dpa	DEG
namptb	6.03216e-102	-0.903705	0.324	0.584	1.47064e-97	Superficial_Epithelial_0dpa_vs_1dpa	DEG
krt4	7.74167e-102	-0.624511	0.994	0.997	1.88742e-97	Superficial_Epithelial_0dpa_vs_1dpa	DEG
pfn2	1.0363e-101	-0.679095	0.492	0.708	2.52651e-97	Superficial_Epithelial_0dpa_vs_1dpa	DEG
si:ch211-244b2.4	1.02733e-100	-0.581351	0.071	0.262	2.50463e-96	Superficial_Epithelial_0dpa_vs_1dpa	DEG
ahcy	2.52693e-100	1.02284	0.362	0.122	6.16066e-96	Superficial_Epithelial_0dpa_vs_1dpa	DEG
itsn2b	4.10861e-100	0.620796	0.871	0.755	1.00168e-95	Superficial_Epithelial_0dpa_vs_1dpa	DEG
rbp4	5.85702e-100	0.77371	0.2	0.006	1.42794e-95	Superficial_Epithelial_0dpa_vs_1dpa	DEG
aak1a	1.66091e-99	0.933713	0.489	0.241	4.0493e-95	Superficial_Epithelial_0dpa_vs_1dpa	DEG
pla2g7	2.63524e-99	-0.708958	0.152	0.377	6.42471e-95	Superficial_Epithelial_0dpa_vs_1dpa	DEG
ralgapa2	3.14106e-99	0.820005	0.623	0.393	7.65791e-95	Superficial_Epithelial_0dpa_vs_1dpa	DEG
llgl2	3.58103e-99	-0.817561	0.341	0.581	8.73054e-95	Superficial_Epithelial_0dpa_vs_1dpa	DEG
sfpq	3.7643e-99	0.819086	0.631	0.405	9.17736e-95	Superficial_Epithelial_0dpa_vs_1dpa	DEG
nrp1a	6.27042e-99	-0.555737	0.035	0.19	1.52873e-94	Superficial_Epithelial_0dpa_vs_1dpa	DEG
si:dkey-85k7.12	7.09664e-99	-0.739101	0.144	0.372	1.73016e-94	Superficial_Epithelial_0dpa_vs_1dpa	DEG
ENSDARG00000098374	1.29838e-98	-0.909336	0.112	0.313	3.16546e-94	Superficial_Epithelial_0dpa_vs_1dpa	DEG
ifit8	1.3644e-98	-0.553971	0.04	0.202	3.32642e-94	Superficial_Epithelial_0dpa_vs_1dpa	DEG
shroom3	2.07497e-98	0.818243	0.304	0.071	5.05879e-94	Superficial_Epithelial_0dpa_vs_1dpa	DEG
ap1m2	2.37563e-98	0.867453	0.455	0.207	5.79179e-94	Superficial_Epithelial_0dpa_vs_1dpa	DEG
evi5b	2.42491e-98	0.609923	0.879	0.74	5.91194e-94	Superficial_Epithelial_0dpa_vs_1dpa	DEG
zmp:0000000991	3.37359e-98	0.956154	0.341	0.103	8.22482e-94	Superficial_Epithelial_0dpa_vs_1dpa	DEG
zgc:113057	7.02334e-98	-0.511736	0.028	0.174	1.71229e-93	Superficial_Epithelial_0dpa_vs_1dpa	DEG
zgc:172133	7.48554e-98	-0.681553	0.104	0.31	1.82498e-93	Superficial_Epithelial_0dpa_vs_1dpa	DEG
ctsh	9.70037e-98	-0.690923	0.103	0.307	2.36495e-93	Superficial_Epithelial_0dpa_vs_1dpa	DEG
sdf2l1	2.43694e-97	-0.461163	0.03	0.177	5.94127e-93	Superficial_Epithelial_0dpa_vs_1dpa	DEG
irf10	7.94736e-97	-0.474461	0.018	0.149	1.93757e-92	Superficial_Epithelial_0dpa_vs_1dpa	DEG
psmb8a	1.13182e-96	-0.744189	0.219	0.46	2.75937e-92	Superficial_Epithelial_0dpa_vs_1dpa	DEG
hephl1a	1.17455e-96	-0.744205	0.247	0.494	2.86354e-92	Superficial_Epithelial_0dpa_vs_1dpa	DEG
FO744833.2	1.80073e-96	-0.733963	0.509	0.721	4.39019e-92	Superficial_Epithelial_0dpa_vs_1dpa	DEG
krtcap2	4.37131e-96	-0.643741	0.102	0.306	1.06573e-91	Superficial_Epithelial_0dpa_vs_1dpa	DEG
psmb12	7.90582e-96	-0.628119	0.106	0.311	1.92744e-91	Superficial_Epithelial_0dpa_vs_1dpa	DEG
ftr86	1.11735e-95	0.904128	0.422	0.177	2.7241e-91	Superficial_Epithelial_0dpa_vs_1dpa	DEG
uba7	1.34558e-95	-0.65348	0.131	0.354	3.28053e-91	Superficial_Epithelial_0dpa_vs_1dpa	DEG
inhbaa	1.84691e-95	-0.605276	0.002	0.1	4.50276e-91	Superficial_Epithelial_0dpa_vs_1dpa	DEG
b2m	1.04217e-94	-0.422849	0.995	0.997	2.5408e-90	Superficial_Epithelial_0dpa_vs_1dpa	DEG
porb	1.33766e-94	0.873592	0.507	0.273	3.26122e-90	Superficial_Epithelial_0dpa_vs_1dpa	DEG
si:dkey-266f7.5	1.5161e-94	-0.678785	0.103	0.301	3.69624e-90	Superficial_Epithelial_0dpa_vs_1dpa	DEG
rassf7b	1.67422e-94	0.584015	0.857	0.712	4.08175e-90	Superficial_Epithelial_0dpa_vs_1dpa	DEG
si:ch73-236c18.9.1	2.11973e-94	1.69218	0.256	0.044	5.16789e-90	Superficial_Epithelial_0dpa_vs_1dpa	DEG
slc16a12b	1.22628e-93	0.777242	0.496	0.244	2.98967e-89	Superficial_Epithelial_0dpa_vs_1dpa	DEG
icn	2.77133e-93	0.47416	0.978	0.866	6.75651e-89	Superficial_Epithelial_0dpa_vs_1dpa	DEG
rasa4	3.5561e-93	-0.577958	0.035	0.183	8.66978e-89	Superficial_Epithelial_0dpa_vs_1dpa	DEG
zgc:153654	1.35846e-92	-0.355643	0.013	0.133	3.31192e-88	Superficial_Epithelial_0dpa_vs_1dpa	DEG
gstm.3	1.43576e-92	-0.46603	0.018	0.143	3.50038e-88	Superficial_Epithelial_0dpa_vs_1dpa	DEG
zgc:163079	2.61914e-92	1.14452	0.549	0.294	6.38547e-88	Superficial_Epithelial_0dpa_vs_1dpa	DEG
acsl4b	3.54134e-92	-0.78372	0.175	0.398	8.63379e-88	Superficial_Epithelial_0dpa_vs_1dpa	DEG
calcoco2	9.94875e-92	-0.729548	0.326	0.558	2.4255e-87	Superficial_Epithelial_0dpa_vs_1dpa	DEG
zgc:162184	1.05733e-91	0.761332	0.504	0.253	2.57777e-87	Superficial_Epithelial_0dpa_vs_1dpa	DEG
cst14a.2	8.56494e-91	-0.663147	0.206	0.442	2.08813e-86	Superficial_Epithelial_0dpa_vs_1dpa	DEG
noxa1	1.7466e-90	0.911731	0.418	0.179	4.25822e-86	Superficial_Epithelial_0dpa_vs_1dpa	DEG
lygl1	2.20834e-90	-0.623935	0.098	0.289	5.38392e-86	Superficial_Epithelial_0dpa_vs_1dpa	DEG
msi2b	7.06921e-90	0.932257	0.466	0.231	1.72347e-85	Superficial_Epithelial_0dpa_vs_1dpa	DEG
FQ311924.2	7.88697e-90	-0.391817	0.014	0.131	1.92284e-85	Superficial_Epithelial_0dpa_vs_1dpa	DEG
plekhg5b	1.88322e-89	-0.591667	0.059	0.224	4.5913e-85	Superficial_Epithelial_0dpa_vs_1dpa	DEG
glrx	6.3009e-89	-0.52639	0.08	0.262	1.53616e-84	Superficial_Epithelial_0dpa_vs_1dpa	DEG
reck	8.29806e-89	-0.513866	0.063	0.233	2.02307e-84	Superficial_Epithelial_0dpa_vs_1dpa	DEG
ubxn1	1.39247e-88	-0.555193	0.067	0.24	3.39485e-84	Superficial_Epithelial_0dpa_vs_1dpa	DEG
si:ch211-285c6.5	2.71239e-88	-0.676475	0.049	0.204	6.61281e-84	Superficial_Epithelial_0dpa_vs_1dpa	DEG
si:ch211-212k18.7	3.23525e-88	-0.548176	0.367	0.634	7.88754e-84	Superficial_Epithelial_0dpa_vs_1dpa	DEG
trafd1	3.9684e-88	-0.464037	0.022	0.149	9.67496e-84	Superficial_Epithelial_0dpa_vs_1dpa	DEG
mef2aa	6.53346e-88	0.656357	0.815	0.653	1.59286e-83	Superficial_Epithelial_0dpa_vs_1dpa	DEG
vgll4l	1.93714e-87	-0.715982	0.07	0.238	4.72275e-83	Superficial_Epithelial_0dpa_vs_1dpa	DEG
snx11	2.21706e-87	-0.467995	0.04	0.186	5.4052e-83	Superficial_Epithelial_0dpa_vs_1dpa	DEG
hip1rb	2.48183e-87	0.695457	0.845	0.718	6.0507e-83	Superficial_Epithelial_0dpa_vs_1dpa	DEG
cldna	2.49161e-87	-1.19874	0.29	0.502	6.07455e-83	Superficial_Epithelial_0dpa_vs_1dpa	DEG
dusp5	3.89376e-87	0.601729	0.922	0.857	9.49298e-83	Superficial_Epithelial_0dpa_vs_1dpa	DEG
insra	4.18306e-87	-0.688901	0.132	0.333	1.01983e-82	Superficial_Epithelial_0dpa_vs_1dpa	DEG
stk17al	4.67136e-87	0.607926	0.77	0.565	1.13888e-82	Superficial_Epithelial_0dpa_vs_1dpa	DEG
cxcl14	9.41851e-87	-0.533543	0.016	0.134	2.29623e-82	Superficial_Epithelial_0dpa_vs_1dpa	DEG
enc3	1.43169e-86	0.806793	0.43	0.196	3.49045e-82	Superficial_Epithelial_0dpa_vs_1dpa	DEG
GALNT3	1.6366e-86	0.823287	0.555	0.333	3.99002e-82	Superficial_Epithelial_0dpa_vs_1dpa	DEG
ssr4	3.10387e-86	-0.633365	0.152	0.36	7.56723e-82	Superficial_Epithelial_0dpa_vs_1dpa	DEG
mt-atp6	3.374e-86	-0.37382	0.998	0.998	8.22581e-82	Superficial_Epithelial_0dpa_vs_1dpa	DEG
SGMS1	6.13454e-86	-0.734363	0.307	0.547	1.4956e-81	Superficial_Epithelial_0dpa_vs_1dpa	DEG
adgrf8	7.64138e-86	-0.727042	0.359	0.586	1.86297e-81	Superficial_Epithelial_0dpa_vs_1dpa	DEG
TXN	7.77176e-86	-0.684032	0.376	0.591	1.89476e-81	Superficial_Epithelial_0dpa_vs_1dpa	DEG
ptgs2a	9.4141e-86	-0.957471	0.146	0.345	2.29516e-81	Superficial_Epithelial_0dpa_vs_1dpa	DEG
epha4a	9.92063e-86	-0.381304	0.012	0.121	2.41865e-81	Superficial_Epithelial_0dpa_vs_1dpa	DEG
entpd8	1.07004e-85	1.10099	0.54	0.308	2.60875e-81	Superficial_Epithelial_0dpa_vs_1dpa	DEG
card14	1.23518e-85	0.615082	0.831	0.675	3.01136e-81	Superficial_Epithelial_0dpa_vs_1dpa	DEG
myofl	1.43579e-85	-0.517692	0.03	0.164	3.50046e-81	Superficial_Epithelial_0dpa_vs_1dpa	DEG
btg2	6.04975e-85	0.689973	0.801	0.659	1.47493e-80	Superficial_Epithelial_0dpa_vs_1dpa	DEG
zmp:0000001138	9.00755e-85	-0.461335	0.043	0.19	2.19604e-80	Superficial_Epithelial_0dpa_vs_1dpa	DEG
timp2a	1.22085e-84	-0.812105	0.238	0.447	2.97644e-80	Superficial_Epithelial_0dpa_vs_1dpa	DEG
si:ch211-232i5.3	2.51314e-84	0.752564	0.632	0.41	6.12704e-80	Superficial_Epithelial_0dpa_vs_1dpa	DEG
si:ch211-166a6.5	4.81187e-84	0.655734	0.78	0.593	1.17313e-79	Superficial_Epithelial_0dpa_vs_1dpa	DEG
nenf	4.94633e-84	-0.600297	0.158	0.37	1.20592e-79	Superficial_Epithelial_0dpa_vs_1dpa	DEG
quo	6.26621e-84	-0.582537	0.077	0.249	1.5277e-79	Superficial_Epithelial_0dpa_vs_1dpa	DEG
stard14	7.04217e-84	0.659999	0.949	0.88	1.71688e-79	Superficial_Epithelial_0dpa_vs_1dpa	DEG
si:ch211-244b2.3	1.32983e-83	-0.55732	0.099	0.286	3.24214e-79	Superficial_Epithelial_0dpa_vs_1dpa	DEG
slc20a1b	2.7215e-83	0.72159	0.695	0.528	6.63501e-79	Superficial_Epithelial_0dpa_vs_1dpa	DEG
alcamb	3.2242e-83	-0.477046	0.025	0.151	7.86059e-79	Superficial_Epithelial_0dpa_vs_1dpa	DEG
stat1b	8.62269e-83	-0.644529	0.203	0.43	2.10221e-78	Superficial_Epithelial_0dpa_vs_1dpa	DEG
ccl25b	9.29241e-83	0.712837	0.183	0.012	2.26549e-78	Superficial_Epithelial_0dpa_vs_1dpa	DEG
tapbp.1	1.02378e-82	-0.686377	0.195	0.415	2.49597e-78	Superficial_Epithelial_0dpa_vs_1dpa	DEG
psmb4	1.2301e-82	-0.62871	0.206	0.425	2.999e-78	Superficial_Epithelial_0dpa_vs_1dpa	DEG
ube2l3b	1.62882e-82	-0.661082	0.348	0.57	3.97106e-78	Superficial_Epithelial_0dpa_vs_1dpa	DEG
daam1b	3.27314e-82	-0.874432	0.254	0.469	7.97991e-78	Superficial_Epithelial_0dpa_vs_1dpa	DEG
nuggc.1	5.30741e-82	-0.794201	0.109	0.292	1.29395e-77	Superficial_Epithelial_0dpa_vs_1dpa	DEG
eif5a2	6.58834e-82	-0.67012	0.206	0.418	1.60624e-77	Superficial_Epithelial_0dpa_vs_1dpa	DEG
si:ch211-183d5.2	6.60484e-82	-0.724	0.057	0.212	1.61026e-77	Superficial_Epithelial_0dpa_vs_1dpa	DEG
sgpl1	6.83046e-82	-0.422511	0.037	0.175	1.66527e-77	Superficial_Epithelial_0dpa_vs_1dpa	DEG
fkbp2	8.08087e-82	-0.473372	0.053	0.205	1.97012e-77	Superficial_Epithelial_0dpa_vs_1dpa	DEG
ptprz1a	1.10624e-81	-0.312434	0.01	0.114	2.69702e-77	Superficial_Epithelial_0dpa_vs_1dpa	DEG
frem2b	1.86334e-81	-0.481847	0.007	0.103	4.54281e-77	Superficial_Epithelial_0dpa_vs_1dpa	DEG
ENSDARG00000076547	1.93265e-81	-0.710511	0.284	0.513	4.71181e-77	Superficial_Epithelial_0dpa_vs_1dpa	DEG
si:ch211-71m22.1	2.08235e-81	-0.418346	0.012	0.118	5.07677e-77	Superficial_Epithelial_0dpa_vs_1dpa	DEG
ddit3	2.3046e-81	0.722033	0.591	0.382	5.61862e-77	Superficial_Epithelial_0dpa_vs_1dpa	DEG
cox8a	4.93035e-81	-0.619804	0.262	0.49	1.20202e-76	Superficial_Epithelial_0dpa_vs_1dpa	DEG
tnfrsfa	6.54674e-81	0.651175	0.824	0.672	1.5961e-76	Superficial_Epithelial_0dpa_vs_1dpa	DEG
ywhabl	8.52535e-81	-0.631056	0.257	0.481	2.07848e-76	Superficial_Epithelial_0dpa_vs_1dpa	DEG
fam83ha	1.05482e-80	-0.606628	0.166	0.374	2.57164e-76	Superficial_Epithelial_0dpa_vs_1dpa	DEG
si:ch1073-90m23.1	1.13592e-80	0.715465	0.226	0.039	2.76937e-76	Superficial_Epithelial_0dpa_vs_1dpa	DEG
arhgap29b	1.97525e-80	-0.710217	0.161	0.366	4.81566e-76	Superficial_Epithelial_0dpa_vs_1dpa	DEG
si:ch211-217k17.12	2.52614e-80	-0.57378	0.062	0.219	6.15873e-76	Superficial_Epithelial_0dpa_vs_1dpa	DEG
si:ch211-217k17.9	2.55464e-80	-0.537416	0.735	0.909	6.22822e-76	Superficial_Epithelial_0dpa_vs_1dpa	DEG
si:dkey-16l2.20	4.01978e-80	0.648661	0.839	0.745	9.80023e-76	Superficial_Epithelial_0dpa_vs_1dpa	DEG
FP236157.4	9.16611e-80	0.771916	0.409	0.186	2.2347e-75	Superficial_Epithelial_0dpa_vs_1dpa	DEG
actn1	1.04615e-79	-0.420122	0.022	0.14	2.55052e-75	Superficial_Epithelial_0dpa_vs_1dpa	DEG
pxk	1.36216e-79	-0.581751	0.078	0.245	3.32095e-75	Superficial_Epithelial_0dpa_vs_1dpa	DEG
dis3l	1.37669e-79	0.831474	0.323	0.112	3.35637e-75	Superficial_Epithelial_0dpa_vs_1dpa	DEG
erbb4b	1.48173e-79	0.845417	0.413	0.185	3.61246e-75	Superficial_Epithelial_0dpa_vs_1dpa	DEG
daam1a	3.04699e-79	0.41775	0.975	0.943	7.42857e-75	Superficial_Epithelial_0dpa_vs_1dpa	DEG
capgb	3.89199e-79	-0.573305	0.145	0.344	9.48868e-75	Superficial_Epithelial_0dpa_vs_1dpa	DEG
pof1b	7.00824e-79	0.487019	0.868	0.696	1.70861e-74	Superficial_Epithelial_0dpa_vs_1dpa	DEG
fam126a	9.06873e-79	0.663659	0.67	0.481	2.21096e-74	Superficial_Epithelial_0dpa_vs_1dpa	DEG
CU655842.1	1.5818e-78	-0.483219	0.058	0.211	3.85643e-74	Superficial_Epithelial_0dpa_vs_1dpa	DEG
hopx	1.70785e-78	0.55197	0.816	0.629	4.16374e-74	Superficial_Epithelial_0dpa_vs_1dpa	DEG
sh3rf1	4.79294e-78	-0.473909	0.034	0.164	1.16852e-73	Superficial_Epithelial_0dpa_vs_1dpa	DEG
sox4a	8.72644e-78	-0.335694	0.011	0.112	2.12751e-73	Superficial_Epithelial_0dpa_vs_1dpa	DEG
pard6a	8.77016e-78	0.679784	0.848	0.742	2.13817e-73	Superficial_Epithelial_0dpa_vs_1dpa	DEG
ehd1b	9.00103e-78	-0.684008	0.18	0.386	2.19445e-73	Superficial_Epithelial_0dpa_vs_1dpa	DEG
shtn1	1.00957e-77	-0.416947	0.026	0.146	2.46133e-73	Superficial_Epithelial_0dpa_vs_1dpa	DEG
pnrc2	1.1919e-77	0.537861	0.881	0.783	2.90585e-73	Superficial_Epithelial_0dpa_vs_1dpa	DEG
tap2a	1.19458e-77	-0.543216	0.088	0.259	2.91239e-73	Superficial_Epithelial_0dpa_vs_1dpa	DEG
krt1-19d	1.55041e-77	0.423599	0.921	0.728	3.77991e-73	Superficial_Epithelial_0dpa_vs_1dpa	DEG
col12a1a	1.61123e-77	-0.894247	0.056	0.203	3.92819e-73	Superficial_Epithelial_0dpa_vs_1dpa	DEG
ifi30	6.21393e-77	-0.651235	0.298	0.527	1.51496e-72	Superficial_Epithelial_0dpa_vs_1dpa	DEG
tmem154	9.05241e-77	-0.504023	0.056	0.203	2.20698e-72	Superficial_Epithelial_0dpa_vs_1dpa	DEG
CU929259.1	9.76296e-77	0.673731	0.578	0.373	2.38021e-72	Superficial_Epithelial_0dpa_vs_1dpa	DEG
mpeg1.3	1.08297e-76	0.619955	0.151	0.001	2.64028e-72	Superficial_Epithelial_0dpa_vs_1dpa	DEG
anxa5b	1.10697e-76	-0.508263	0.048	0.188	2.69879e-72	Superficial_Epithelial_0dpa_vs_1dpa	DEG
zgc:64106	3.11966e-76	0.722377	0.3	0.094	7.60574e-72	Superficial_Epithelial_0dpa_vs_1dpa	DEG
krt8	3.8257e-76	-0.650847	0.478	0.671	9.32705e-72	Superficial_Epithelial_0dpa_vs_1dpa	DEG
cox7b	4.22841e-76	-0.582052	0.145	0.341	1.03089e-71	Superficial_Epithelial_0dpa_vs_1dpa	DEG
si:ch211-213a13.1	4.48941e-76	-0.389055	0.032	0.158	1.09452e-71	Superficial_Epithelial_0dpa_vs_1dpa	DEG
angptl2a	4.50996e-76	-0.355529	0.016	0.124	1.09953e-71	Superficial_Epithelial_0dpa_vs_1dpa	DEG
sema6dl	4.64527e-76	-0.669802	0.047	0.185	1.13252e-71	Superficial_Epithelial_0dpa_vs_1dpa	DEG
ube2na	5.25412e-76	-0.550157	0.148	0.346	1.28095e-71	Superficial_Epithelial_0dpa_vs_1dpa	DEG
cpeb4b	6.75587e-76	0.610621	0.777	0.623	1.64708e-71	Superficial_Epithelial_0dpa_vs_1dpa	DEG
ezra	7.01865e-76	-0.452368	0.262	0.519	1.71115e-71	Superficial_Epithelial_0dpa_vs_1dpa	DEG
phlda2	7.2096e-76	0.433932	0.971	0.906	1.7577e-71	Superficial_Epithelial_0dpa_vs_1dpa	DEG
sting1	9.36938e-76	-0.62451	0.233	0.45	2.28425e-71	Superficial_Epithelial_0dpa_vs_1dpa	DEG
zgc:171506	1.05746e-75	-0.525992	0.073	0.232	2.57808e-71	Superficial_Epithelial_0dpa_vs_1dpa	DEG
kcnn4	1.13752e-75	0.827264	0.356	0.148	2.77327e-71	Superficial_Epithelial_0dpa_vs_1dpa	DEG
cavin2b	1.38802e-75	0.697997	0.604	0.41	3.384e-71	Superficial_Epithelial_0dpa_vs_1dpa	DEG
si:ch1073-181h11.2	1.99944e-75	-0.481971	0.064	0.218	4.87463e-71	Superficial_Epithelial_0dpa_vs_1dpa	DEG
zgc:162182	2.26044e-75	-0.430629	0.029	0.152	5.51094e-71	Superficial_Epithelial_0dpa_vs_1dpa	DEG
skib	3.32985e-75	-0.347384	0.024	0.14	8.11819e-71	Superficial_Epithelial_0dpa_vs_1dpa	DEG
dmrt1	3.56045e-75	1.06793	0.434	0.219	8.68039e-71	Superficial_Epithelial_0dpa_vs_1dpa	DEG
SEMA4F	5.06615e-75	0.739302	0.603	0.404	1.23513e-70	Superficial_Epithelial_0dpa_vs_1dpa	DEG
nfkb2	5.21684e-75	-0.445268	0.052	0.196	1.27186e-70	Superficial_Epithelial_0dpa_vs_1dpa	DEG
vcp	7.29926e-75	-0.581628	0.552	0.72	1.77956e-70	Superficial_Epithelial_0dpa_vs_1dpa	DEG
aplp2	7.60903e-75	-0.579028	0.528	0.699	1.85508e-70	Superficial_Epithelial_0dpa_vs_1dpa	DEG
yaf2	1.05006e-74	-0.452013	0.057	0.205	2.56005e-70	Superficial_Epithelial_0dpa_vs_1dpa	DEG
slc46a2	2.91074e-74	0.836342	0.541	0.328	7.09637e-70	Superficial_Epithelial_0dpa_vs_1dpa	DEG
si:ch211-91p5.3	4.27913e-74	-0.517489	0.103	0.279	1.04325e-69	Superficial_Epithelial_0dpa_vs_1dpa	DEG
htra1b	6.96062e-74	-0.479591	0.019	0.127	1.697e-69	Superficial_Epithelial_0dpa_vs_1dpa	DEG
scrn3	8.03985e-74	-0.416215	0.05	0.192	1.96011e-69	Superficial_Epithelial_0dpa_vs_1dpa	DEG
serpine2	8.69358e-74	-0.47205	0.264	0.505	2.11949e-69	Superficial_Epithelial_0dpa_vs_1dpa	DEG
cdc42bpb	9.79176e-74	0.556259	0.848	0.734	2.38723e-69	Superficial_Epithelial_0dpa_vs_1dpa	DEG
tnfrsf9a	9.82742e-74	-0.903691	0.057	0.199	2.39592e-69	Superficial_Epithelial_0dpa_vs_1dpa	DEG
rbm47	2.10589e-73	0.680605	0.67	0.497	5.13416e-69	Superficial_Epithelial_0dpa_vs_1dpa	DEG
si:dkeyp-30d6.2	2.42166e-73	-0.514517	0.071	0.225	5.904e-69	Superficial_Epithelial_0dpa_vs_1dpa	DEG
tgm1l1	2.99299e-73	-0.761562	0.36	0.571	7.29692e-69	Superficial_Epithelial_0dpa_vs_1dpa	DEG
nr1d4b	3.47811e-73	-0.559787	0.052	0.192	8.47962e-69	Superficial_Epithelial_0dpa_vs_1dpa	DEG
krt97	4.39263e-73	-0.583624	0.685	0.885	1.07092e-68	Superficial_Epithelial_0dpa_vs_1dpa	DEG
pard6gb	4.77875e-73	-0.527007	0.05	0.189	1.16506e-68	Superficial_Epithelial_0dpa_vs_1dpa	DEG
si:ch211-76l23.4	5.79708e-73	0.765781	0.149	0.004	1.41333e-68	Superficial_Epithelial_0dpa_vs_1dpa	DEG
sp9	6.36362e-73	-0.438913	0.042	0.176	1.55145e-68	Superficial_Epithelial_0dpa_vs_1dpa	DEG
rpz5	1.02594e-72	-0.556743	0.05	0.187	2.50124e-68	Superficial_Epithelial_0dpa_vs_1dpa	DEG
prickle1a	1.18098e-72	-0.385996	0.021	0.129	2.87924e-68	Superficial_Epithelial_0dpa_vs_1dpa	DEG
upk3b	1.4871e-72	-0.687474	0.052	0.19	3.62556e-68	Superficial_Epithelial_0dpa_vs_1dpa	DEG
tapbp.2	1.78866e-72	-0.488902	0.046	0.181	4.36074e-68	Superficial_Epithelial_0dpa_vs_1dpa	DEG
spcs1	1.95681e-72	-0.533631	0.09	0.254	4.77071e-68	Superficial_Epithelial_0dpa_vs_1dpa	DEG
rpn1	2.56298e-72	-0.509118	0.128	0.312	6.24855e-68	Superficial_Epithelial_0dpa_vs_1dpa	DEG
btg1	2.66712e-72	0.328918	0.992	0.971	6.50244e-68	Superficial_Epithelial_0dpa_vs_1dpa	DEG
tp63	2.74712e-72	-1.39121	0.153	0.323	6.69747e-68	Superficial_Epithelial_0dpa_vs_1dpa	DEG
prkcsh	3.0868e-72	-0.529019	0.132	0.317	7.52561e-68	Superficial_Epithelial_0dpa_vs_1dpa	DEG
p4hb	3.24566e-72	-0.634476	0.235	0.436	7.91292e-68	Superficial_Epithelial_0dpa_vs_1dpa	DEG
psmb2	3.86641e-72	-0.532407	0.146	0.339	9.42632e-68	Superficial_Epithelial_0dpa_vs_1dpa	DEG
usp2b	3.91143e-72	0.605784	0.227	0.047	9.53607e-68	Superficial_Epithelial_0dpa_vs_1dpa	DEG
rarres3l	3.97657e-72	-0.635176	0.138	0.324	9.69488e-68	Superficial_Epithelial_0dpa_vs_1dpa	DEG
arhgef38	4.08534e-72	0.67867	0.464	0.235	9.96006e-68	Superficial_Epithelial_0dpa_vs_1dpa	DEG
si:ch211-200p22.4	4.98295e-72	0.650665	0.675	0.497	1.21484e-67	Superficial_Epithelial_0dpa_vs_1dpa	DEG
abca1a	1.35409e-71	-0.680432	0.092	0.257	3.30128e-67	Superficial_Epithelial_0dpa_vs_1dpa	DEG
si:dkey-68o6.6	1.45093e-71	-0.42358	0.028	0.144	3.53736e-67	Superficial_Epithelial_0dpa_vs_1dpa	DEG
myo1ea	2.19826e-71	0.711823	0.728	0.562	5.35935e-67	Superficial_Epithelial_0dpa_vs_1dpa	DEG
f2rl1.1	4.07989e-71	-0.506906	0.059	0.203	9.94677e-67	Superficial_Epithelial_0dpa_vs_1dpa	DEG
emp2	6.00911e-71	0.648887	0.298	0.1	1.46502e-66	Superficial_Epithelial_0dpa_vs_1dpa	DEG
casp8	6.58337e-71	-0.535686	0.116	0.292	1.60503e-66	Superficial_Epithelial_0dpa_vs_1dpa	DEG
errfi1a	7.70287e-71	0.712925	0.533	0.326	1.87796e-66	Superficial_Epithelial_0dpa_vs_1dpa	DEG
zgc:113314	1.3609e-70	-0.566279	0.071	0.223	3.31787e-66	Superficial_Epithelial_0dpa_vs_1dpa	DEG
ATE1	1.67634e-70	-0.62391	0.317	0.531	4.08691e-66	Superficial_Epithelial_0dpa_vs_1dpa	DEG
fam169aa	2.73795e-70	0.560515	0.171	0.017	6.67513e-66	Superficial_Epithelial_0dpa_vs_1dpa	DEG
tmed10	3.93624e-70	-0.579115	0.359	0.565	9.59656e-66	Superficial_Epithelial_0dpa_vs_1dpa	DEG
nbeal2	5.76579e-70	0.700383	0.577	0.378	1.4057e-65	Superficial_Epithelial_0dpa_vs_1dpa	DEG
mid1ip1a	7.73959e-70	0.398746	0.964	0.858	1.88691e-65	Superficial_Epithelial_0dpa_vs_1dpa	DEG
cox6a1	2.15857e-69	-0.62225	0.312	0.513	5.26259e-65	Superficial_Epithelial_0dpa_vs_1dpa	DEG
trim35-3	2.36191e-69	-0.406583	0.015	0.112	5.75833e-65	Superficial_Epithelial_0dpa_vs_1dpa	DEG
psma5	3.87284e-69	-0.489167	0.1	0.268	9.44199e-65	Superficial_Epithelial_0dpa_vs_1dpa	DEG
si:ch211-125o16.4	4.73688e-69	0.398785	0.981	0.911	1.15485e-64	Superficial_Epithelial_0dpa_vs_1dpa	DEG
ankmy1	8.06585e-69	0.745408	0.204	0.039	1.96645e-64	Superficial_Epithelial_0dpa_vs_1dpa	DEG
si:ch211-281g13.4	9.56156e-69	-0.390069	0.033	0.152	2.33111e-64	Superficial_Epithelial_0dpa_vs_1dpa	DEG
tspan9a	1.69236e-68	-0.657334	0.038	0.159	4.12598e-64	Superficial_Epithelial_0dpa_vs_1dpa	DEG
rnf114	2.14672e-68	-0.535277	0.133	0.312	5.23371e-64	Superficial_Epithelial_0dpa_vs_1dpa	DEG
ywhaba	4.32616e-68	-0.57144	0.416	0.61	1.05472e-63	Superficial_Epithelial_0dpa_vs_1dpa	DEG
trib3	8.06956e-68	0.578135	0.718	0.553	1.96736e-63	Superficial_Epithelial_0dpa_vs_1dpa	DEG
atp5f1b	9.6712e-68	-0.635955	0.297	0.49	2.35784e-63	Superficial_Epithelial_0dpa_vs_1dpa	DEG
psma6l	1.30546e-67	-0.40247	0.053	0.188	3.1827e-63	Superficial_Epithelial_0dpa_vs_1dpa	DEG
vdac2	1.90514e-67	-0.562222	0.312	0.516	4.64474e-63	Superficial_Epithelial_0dpa_vs_1dpa	DEG
psmb6	2.47451e-67	-0.487199	0.104	0.272	6.03285e-63	Superficial_Epithelial_0dpa_vs_1dpa	DEG
trim105	4.22974e-67	-0.459238	0.048	0.178	1.03121e-62	Superficial_Epithelial_0dpa_vs_1dpa	DEG
ENSDARG00000115101	5.26937e-67	-0.466902	0.016	0.113	1.28467e-62	Superficial_Epithelial_0dpa_vs_1dpa	DEG
tes	6.02496e-67	-0.389708	0.036	0.155	1.46889e-62	Superficial_Epithelial_0dpa_vs_1dpa	DEG
bcam	8.5073e-67	-0.640767	0.016	0.111	2.07408e-62	Superficial_Epithelial_0dpa_vs_1dpa	DEG
uacaa	1.18552e-66	0.739175	0.368	0.175	2.8903e-62	Superficial_Epithelial_0dpa_vs_1dpa	DEG
glsb	1.35939e-66	0.787832	0.576	0.41	3.31419e-62	Superficial_Epithelial_0dpa_vs_1dpa	DEG
fasn	3.37841e-66	0.712766	0.442	0.242	8.23657e-62	Superficial_Epithelial_0dpa_vs_1dpa	DEG
emd	4.32897e-66	-0.592251	0.256	0.454	1.0554e-61	Superficial_Epithelial_0dpa_vs_1dpa	DEG
irf7	6.72222e-66	-0.664955	0.29	0.494	1.63888e-61	Superficial_Epithelial_0dpa_vs_1dpa	DEG
kifc3	7.12472e-66	-0.653836	0.267	0.47	1.73701e-61	Superficial_Epithelial_0dpa_vs_1dpa	DEG
sec23b	7.98203e-66	0.465271	0.942	0.874	1.94602e-61	Superficial_Epithelial_0dpa_vs_1dpa	DEG
tob1b	9.96441e-66	0.395244	0.98	0.935	2.42932e-61	Superficial_Epithelial_0dpa_vs_1dpa	DEG
ubc	1.26009e-65	-0.464637	0.803	0.876	3.0721e-61	Superficial_Epithelial_0dpa_vs_1dpa	DEG
tcf3a	1.32419e-65	-0.637334	0.169	0.354	3.22838e-61	Superficial_Epithelial_0dpa_vs_1dpa	DEG
csrp1a	1.61298e-65	-0.332977	0.025	0.13	3.93244e-61	Superficial_Epithelial_0dpa_vs_1dpa	DEG
col5a1	1.62456e-65	-1.0475	0.033	0.146	3.96068e-61	Superficial_Epithelial_0dpa_vs_1dpa	DEG
rhpn2	2.38543e-65	0.335749	0.987	0.962	5.81567e-61	Superficial_Epithelial_0dpa_vs_1dpa	DEG
si:dkey-45k15.1	2.75847e-65	-0.448391	0.063	0.202	6.72514e-61	Superficial_Epithelial_0dpa_vs_1dpa	DEG
chmp4ba	2.85557e-65	0.688529	0.549	0.365	6.96187e-61	Superficial_Epithelial_0dpa_vs_1dpa	DEG
enc1	3.04419e-65	0.683522	0.373	0.172	7.42175e-61	Superficial_Epithelial_0dpa_vs_1dpa	DEG
ptges3b	7.04265e-65	-0.517102	0.153	0.334	1.717e-60	Superficial_Epithelial_0dpa_vs_1dpa	DEG
si:dkey-42i9.6	1.26382e-64	-0.582608	0.255	0.45	3.08119e-60	Superficial_Epithelial_0dpa_vs_1dpa	DEG
rbms1b	2.02042e-64	0.653766	0.651	0.489	4.92579e-60	Superficial_Epithelial_0dpa_vs_1dpa	DEG
CT030129.1	2.44141e-64	0.702908	0.661	0.464	5.95216e-60	Superficial_Epithelial_0dpa_vs_1dpa	DEG
dpp3	3.68295e-64	-0.371377	0.043	0.166	8.97904e-60	Superficial_Epithelial_0dpa_vs_1dpa	DEG
zgc:162941	9.18952e-64	-0.550663	0.14	0.314	2.2404e-59	Superficial_Epithelial_0dpa_vs_1dpa	DEG
elf3	1.04294e-63	0.647824	0.582	0.373	2.54269e-59	Superficial_Epithelial_0dpa_vs_1dpa	DEG
selenof	1.05475e-63	-0.545177	0.266	0.466	2.57149e-59	Superficial_Epithelial_0dpa_vs_1dpa	DEG
col1a1a	1.05973e-63	-1.10018	0.035	0.147	2.58362e-59	Superficial_Epithelial_0dpa_vs_1dpa	DEG
ms4a17a.4	1.1951e-63	-0.513117	0.112	0.273	2.91365e-59	Superficial_Epithelial_0dpa_vs_1dpa	DEG
bcl2l11	1.37643e-63	-0.681756	0.289	0.487	3.35575e-59	Superficial_Epithelial_0dpa_vs_1dpa	DEG
arhgap32a	2.0655e-63	-0.505052	0.024	0.126	5.03568e-59	Superficial_Epithelial_0dpa_vs_1dpa	DEG
tmcc1b	2.25247e-63	0.6476	0.712	0.565	5.49152e-59	Superficial_Epithelial_0dpa_vs_1dpa	DEG
plpp2a	2.37382e-63	0.736217	0.421	0.231	5.78737e-59	Superficial_Epithelial_0dpa_vs_1dpa	DEG
ier5	3.48739e-63	0.496944	0.793	0.667	8.50226e-59	Superficial_Epithelial_0dpa_vs_1dpa	DEG
tpm3	3.67467e-63	0.506903	0.864	0.788	8.95886e-59	Superficial_Epithelial_0dpa_vs_1dpa	DEG
ar	4.11935e-63	0.784387	0.589	0.397	1.0043e-58	Superficial_Epithelial_0dpa_vs_1dpa	DEG
si:dkey-40c23.2	6.92439e-63	-0.539948	0.212	0.404	1.68817e-58	Superficial_Epithelial_0dpa_vs_1dpa	DEG
tmem176l.1	1.10675e-62	-0.261267	0.014	0.104	2.69825e-58	Superficial_Epithelial_0dpa_vs_1dpa	DEG
tgm8	1.28175e-62	-0.479118	0.117	0.284	3.12491e-58	Superficial_Epithelial_0dpa_vs_1dpa	DEG
hmga1a	1.41683e-62	-0.524567	0.163	0.344	3.45422e-58	Superficial_Epithelial_0dpa_vs_1dpa	DEG
selenow1	2.08599e-62	0.398558	0.977	0.936	5.08563e-58	Superficial_Epithelial_0dpa_vs_1dpa	DEG
cfd	2.51672e-62	0.500081	0.124	0.001	6.13575e-58	Superficial_Epithelial_0dpa_vs_1dpa	DEG
ostc	2.53138e-62	-0.53657	0.164	0.347	6.17151e-58	Superficial_Epithelial_0dpa_vs_1dpa	DEG
bpnt1	3.0894e-62	0.625271	0.374	0.175	7.53197e-58	Superficial_Epithelial_0dpa_vs_1dpa	DEG
eef2b	3.17463e-62	0.434838	0.907	0.817	7.73975e-58	Superficial_Epithelial_0dpa_vs_1dpa	DEG
tmsb1	4.25843e-62	-0.730915	0.659	0.744	1.0382e-57	Superficial_Epithelial_0dpa_vs_1dpa	DEG
cux1a	4.42987e-62	-0.609948	0.284	0.475	1.08e-57	Superficial_Epithelial_0dpa_vs_1dpa	DEG
ctnnb2	5.47478e-62	-0.577021	0.229	0.416	1.33475e-57	Superficial_Epithelial_0dpa_vs_1dpa	DEG
lasp1	6.55566e-62	-0.528093	0.219	0.411	1.59827e-57	Superficial_Epithelial_0dpa_vs_1dpa	DEG
ppap2d	6.75599e-62	-0.37967	0.023	0.122	1.64711e-57	Superficial_Epithelial_0dpa_vs_1dpa	DEG
arpc3	7.84742e-62	-0.522504	0.206	0.397	1.9132e-57	Superficial_Epithelial_0dpa_vs_1dpa	DEG
ubb	8.13145e-62	0.337799	0.991	0.983	1.98245e-57	Superficial_Epithelial_0dpa_vs_1dpa	DEG
arntl2	8.14249e-62	-0.349332	0.019	0.113	1.98514e-57	Superficial_Epithelial_0dpa_vs_1dpa	DEG
serpinb1l4	1.5812e-61	-0.729793	0.171	0.34	3.85497e-57	Superficial_Epithelial_0dpa_vs_1dpa	DEG
evpla	2.66941e-61	0.290215	0.999	0.993	6.50801e-57	Superficial_Epithelial_0dpa_vs_1dpa	DEG
pfkpa	5.9136e-61	-0.397576	0.022	0.12	1.44173e-56	Superficial_Epithelial_0dpa_vs_1dpa	DEG
fmr1	1.09107e-60	-0.483737	0.141	0.313	2.66002e-56	Superficial_Epithelial_0dpa_vs_1dpa	DEG
si:dkeyp-67a8.4.1	2.73102e-60	0.579363	0.602	0.419	6.65823e-56	Superficial_Epithelial_0dpa_vs_1dpa	DEG
spire1a	3.08783e-60	0.512256	0.799	0.666	7.52813e-56	Superficial_Epithelial_0dpa_vs_1dpa	DEG
foxp1a	3.1839e-60	-0.572876	0.186	0.366	7.76236e-56	Superficial_Epithelial_0dpa_vs_1dpa	DEG
psma1	4.7548e-60	-0.531242	0.193	0.377	1.15922e-55	Superficial_Epithelial_0dpa_vs_1dpa	DEG
btbd10b	4.8816e-60	-0.555479	0.367	0.56	1.19013e-55	Superficial_Epithelial_0dpa_vs_1dpa	DEG
sdcbp2	5.49357e-60	0.403351	0.939	0.896	1.33933e-55	Superficial_Epithelial_0dpa_vs_1dpa	DEG
hint1	6.94823e-60	-0.431024	0.056	0.182	1.69398e-55	Superficial_Epithelial_0dpa_vs_1dpa	DEG
cep85l	7.5489e-60	-0.517663	0.061	0.19	1.84042e-55	Superficial_Epithelial_0dpa_vs_1dpa	DEG
si:dkey-97a13.6	8.45476e-60	-0.353504	0.034	0.142	2.06127e-55	Superficial_Epithelial_0dpa_vs_1dpa	DEG
cers2a	9.78326e-60	0.811803	0.442	0.26	2.38516e-55	Superficial_Epithelial_0dpa_vs_1dpa	DEG
MDFI	1.08036e-59	-0.288883	0.014	0.1	2.63393e-55	Superficial_Epithelial_0dpa_vs_1dpa	DEG
parga	1.15888e-59	-0.484561	0.102	0.254	2.82535e-55	Superficial_Epithelial_0dpa_vs_1dpa	DEG
prdx2	1.42546e-59	-0.351259	0.035	0.145	3.47526e-55	Superficial_Epithelial_0dpa_vs_1dpa	DEG
sytl3	1.81786e-59	0.567927	0.184	0.037	4.43194e-55	Superficial_Epithelial_0dpa_vs_1dpa	DEG
rbx1	1.9514e-59	-0.476528	0.147	0.321	4.75752e-55	Superficial_Epithelial_0dpa_vs_1dpa	DEG
rflna	2.29557e-59	-0.519024	0.103	0.256	5.59661e-55	Superficial_Epithelial_0dpa_vs_1dpa	DEG
hmgcs1	4.01475e-59	0.718767	0.247	0.083	9.78796e-55	Superficial_Epithelial_0dpa_vs_1dpa	DEG
arpc2	4.12672e-59	-0.503381	0.236	0.425	1.00609e-54	Superficial_Epithelial_0dpa_vs_1dpa	DEG
yars1	4.20466e-59	-0.47673	0.103	0.255	1.0251e-54	Superficial_Epithelial_0dpa_vs_1dpa	DEG
scinla	4.51713e-59	-0.370237	0.029	0.132	1.10128e-54	Superficial_Epithelial_0dpa_vs_1dpa	DEG
gapdhs	4.96276e-59	-0.548208	0.337	0.529	1.20992e-54	Superficial_Epithelial_0dpa_vs_1dpa	DEG
crybb3	6.533e-59	0.643285	0.333	0.15	1.59275e-54	Superficial_Epithelial_0dpa_vs_1dpa	DEG
arrdc2	9.22085e-59	-0.64595	0.116	0.272	2.24804e-54	Superficial_Epithelial_0dpa_vs_1dpa	DEG
arhgef10lb	1.88248e-58	-0.585752	0.091	0.235	4.58948e-54	Superficial_Epithelial_0dpa_vs_1dpa	DEG
dgkza	2.4723e-58	0.715411	0.364	0.181	6.02747e-54	Superficial_Epithelial_0dpa_vs_1dpa	DEG
zgc:112964	2.55013e-58	0.753932	0.361	0.177	6.21721e-54	Superficial_Epithelial_0dpa_vs_1dpa	DEG
cnpy1	2.70486e-58	-0.545106	0.155	0.325	6.59444e-54	Superficial_Epithelial_0dpa_vs_1dpa	DEG
rhov	2.85013e-58	-0.628181	0.51	0.653	6.94861e-54	Superficial_Epithelial_0dpa_vs_1dpa	DEG
col1a2	3.87119e-58	-0.992561	0.045	0.158	9.43795e-54	Superficial_Epithelial_0dpa_vs_1dpa	DEG
tagln2	4.87261e-58	-0.632513	0.156	0.319	1.18794e-53	Superficial_Epithelial_0dpa_vs_1dpa	DEG
cxcl8b.1	5.1504e-58	0.715359	0.217	0.06	1.25567e-53	Superficial_Epithelial_0dpa_vs_1dpa	DEG
tmed2	6.59275e-58	-0.511605	0.367	0.559	1.60731e-53	Superficial_Epithelial_0dpa_vs_1dpa	DEG
impdh1a	9.81067e-58	0.592037	0.275	0.103	2.39184e-53	Superficial_Epithelial_0dpa_vs_1dpa	DEG
dsc2l	1.16784e-57	-0.366748	0.988	0.993	2.84719e-53	Superficial_Epithelial_0dpa_vs_1dpa	DEG
rbfox1l	1.21809e-57	0.617673	0.139	0.013	2.96971e-53	Superficial_Epithelial_0dpa_vs_1dpa	DEG
ccser1	1.32127e-57	0.724559	0.52	0.34	3.22125e-53	Superficial_Epithelial_0dpa_vs_1dpa	DEG
relb	1.36201e-57	-0.598132	0.21	0.391	3.32058e-53	Superficial_Epithelial_0dpa_vs_1dpa	DEG
gsna	1.36309e-57	-0.263529	0.016	0.103	3.32322e-53	Superficial_Epithelial_0dpa_vs_1dpa	DEG
nos2a	1.49916e-57	0.654784	0.556	0.339	3.65496e-53	Superficial_Epithelial_0dpa_vs_1dpa	DEG
dnajb1b	1.63521e-57	0.498498	0.896	0.797	3.98664e-53	Superficial_Epithelial_0dpa_vs_1dpa	DEG
bmpr1ba	2.30926e-57	-0.346027	0.038	0.148	5.62999e-53	Superficial_Epithelial_0dpa_vs_1dpa	DEG
psma8	2.77011e-57	-0.448253	0.136	0.301	6.75352e-53	Superficial_Epithelial_0dpa_vs_1dpa	DEG
si:dkeyp-13a3.10	3.48261e-57	-0.449267	0.047	0.164	8.49061e-53	Superficial_Epithelial_0dpa_vs_1dpa	DEG
s100v2	3.58452e-57	-0.603548	0.467	0.62	8.73906e-53	Superficial_Epithelial_0dpa_vs_1dpa	DEG
dusp7	3.94696e-57	0.578917	0.592	0.432	9.62268e-53	Superficial_Epithelial_0dpa_vs_1dpa	DEG
RTKN	4.39786e-57	-0.361308	0.032	0.138	1.0722e-52	Superficial_Epithelial_0dpa_vs_1dpa	DEG
gk5	5.84865e-57	0.64101	0.285	0.115	1.4259e-52	Superficial_Epithelial_0dpa_vs_1dpa	DEG
elovl6l	1.11941e-56	0.493546	0.738	0.593	2.72911e-52	Superficial_Epithelial_0dpa_vs_1dpa	DEG
elovl1a	1.17093e-56	0.394499	0.92	0.854	2.85474e-52	Superficial_Epithelial_0dpa_vs_1dpa	DEG
abtb2b	1.25165e-56	-0.586356	0.265	0.459	3.05153e-52	Superficial_Epithelial_0dpa_vs_1dpa	DEG
pycard	1.43563e-56	-0.3956	0.075	0.212	3.50008e-52	Superficial_Epithelial_0dpa_vs_1dpa	DEG
si:dkey-177p2.6	1.79136e-56	0.563895	0.67	0.522	4.36735e-52	Superficial_Epithelial_0dpa_vs_1dpa	DEG
zgc:113625	1.8122e-56	-0.784109	0.271	0.445	4.41815e-52	Superficial_Epithelial_0dpa_vs_1dpa	DEG
ssh2a	2.05091e-56	0.43602	0.876	0.784	5.00012e-52	Superficial_Epithelial_0dpa_vs_1dpa	DEG
aqp3a	2.19956e-56	-0.8925	0.355	0.511	5.36252e-52	Superficial_Epithelial_0dpa_vs_1dpa	DEG
atf4b	2.70244e-56	0.458036	0.815	0.695	6.58854e-52	Superficial_Epithelial_0dpa_vs_1dpa	DEG
mxe	2.98913e-56	-0.511168	0.13	0.292	7.2875e-52	Superficial_Epithelial_0dpa_vs_1dpa	DEG
si:ch211-208g24.8	3.07486e-56	-0.410477	0.049	0.167	7.4965e-52	Superficial_Epithelial_0dpa_vs_1dpa	DEG
ifrd1	3.55445e-56	0.614582	0.456	0.277	8.66574e-52	Superficial_Epithelial_0dpa_vs_1dpa	DEG
plk2a	3.59733e-56	-0.492865	0.077	0.211	8.7703e-52	Superficial_Epithelial_0dpa_vs_1dpa	DEG
si:rp71-36a1.5	3.66501e-56	-0.510042	0.584	0.734	8.93529e-52	Superficial_Epithelial_0dpa_vs_1dpa	DEG
ms4a17a.2	4.69306e-56	-0.44466	0.094	0.236	1.14417e-51	Superficial_Epithelial_0dpa_vs_1dpa	DEG
myo1cb	6.27984e-56	-0.652016	0.4	0.567	1.53103e-51	Superficial_Epithelial_0dpa_vs_1dpa	DEG
bahd1	7.63035e-56	-0.499606	0.262	0.456	1.86028e-51	Superficial_Epithelial_0dpa_vs_1dpa	DEG
sec61b	1.11631e-55	-0.536189	0.175	0.345	2.72156e-51	Superficial_Epithelial_0dpa_vs_1dpa	DEG
runx2b	1.24799e-55	0.693692	0.172	0.034	3.04259e-51	Superficial_Epithelial_0dpa_vs_1dpa	DEG
eps8l2	1.41144e-55	0.967848	0.498	0.336	3.44109e-51	Superficial_Epithelial_0dpa_vs_1dpa	DEG
fxyd6l	1.6154e-55	0.60293	0.467	0.283	3.93835e-51	Superficial_Epithelial_0dpa_vs_1dpa	DEG
tfap2c	1.709e-55	0.562057	0.587	0.408	4.16655e-51	Superficial_Epithelial_0dpa_vs_1dpa	DEG
tmprss13b	1.838e-55	0.476936	0.831	0.729	4.48104e-51	Superficial_Epithelial_0dpa_vs_1dpa	DEG
xbp1	2.16963e-55	0.467112	0.851	0.75	5.28956e-51	Superficial_Epithelial_0dpa_vs_1dpa	DEG
arhgef11	2.47151e-55	-0.512646	0.116	0.268	6.02554e-51	Superficial_Epithelial_0dpa_vs_1dpa	DEG
CABZ01048956.1	2.69811e-55	0.596643	0.882	0.811	6.57799e-51	Superficial_Epithelial_0dpa_vs_1dpa	DEG
soul2	3.13162e-55	0.521415	0.753	0.614	7.6349e-51	Superficial_Epithelial_0dpa_vs_1dpa	DEG
uqcr10	3.65698e-55	-0.466667	0.122	0.277	8.91572e-51	Superficial_Epithelial_0dpa_vs_1dpa	DEG
casp23	4.00392e-55	-0.437926	0.047	0.16	9.76156e-51	Superficial_Epithelial_0dpa_vs_1dpa	DEG
map4k5	4.37675e-55	-0.378765	0.09	0.233	1.06705e-50	Superficial_Epithelial_0dpa_vs_1dpa	DEG
ndel1b	4.6573e-55	0.580977	0.573	0.406	1.13545e-50	Superficial_Epithelial_0dpa_vs_1dpa	DEG
mtdha	6.49463e-55	-0.520644	0.426	0.609	1.58339e-50	Superficial_Epithelial_0dpa_vs_1dpa	DEG
tuft1a	7.81753e-55	0.644635	0.721	0.602	1.90591e-50	Superficial_Epithelial_0dpa_vs_1dpa	DEG
arl4cb	1.02429e-54	-0.291729	0.029	0.127	2.49723e-50	Superficial_Epithelial_0dpa_vs_1dpa	DEG
fa2h	1.1516e-54	0.554597	0.719	0.585	2.80761e-50	Superficial_Epithelial_0dpa_vs_1dpa	DEG
psmd12	1.31345e-54	-0.367013	0.077	0.212	3.2022e-50	Superficial_Epithelial_0dpa_vs_1dpa	DEG
si:ch211-129c21.1	1.50115e-54	0.592766	0.547	0.376	3.65979e-50	Superficial_Epithelial_0dpa_vs_1dpa	DEG
nuggc.2	1.97634e-54	-0.516136	0.075	0.204	4.81831e-50	Superficial_Epithelial_0dpa_vs_1dpa	DEG
slc25a55b	2.00133e-54	0.491651	0.172	0.035	4.87925e-50	Superficial_Epithelial_0dpa_vs_1dpa	DEG
cycsb	2.16399e-54	-0.538983	0.365	0.553	5.2758e-50	Superficial_Epithelial_0dpa_vs_1dpa	DEG
keap1a	2.2934e-54	-0.54626	0.382	0.574	5.59132e-50	Superficial_Epithelial_0dpa_vs_1dpa	DEG
grinab	2.46781e-54	-0.493334	0.183	0.353	6.01651e-50	Superficial_Epithelial_0dpa_vs_1dpa	DEG
pmepa1	3.2558e-54	-0.450842	0.09	0.227	7.93763e-50	Superficial_Epithelial_0dpa_vs_1dpa	DEG
ltb4r2a	3.2722e-54	-0.517903	0.079	0.21	7.97763e-50	Superficial_Epithelial_0dpa_vs_1dpa	DEG
zgc:194398	3.41123e-54	0.390875	0.123	0.007	8.31657e-50	Superficial_Epithelial_0dpa_vs_1dpa	DEG
abracl	4.63047e-54	-0.461225	0.148	0.312	1.12891e-49	Superficial_Epithelial_0dpa_vs_1dpa	DEG
b4galnt3a	4.91097e-54	0.687653	0.364	0.188	1.19729e-49	Superficial_Epithelial_0dpa_vs_1dpa	DEG
itgb6	4.98486e-54	-0.374883	0.041	0.148	1.21531e-49	Superficial_Epithelial_0dpa_vs_1dpa	DEG
blmh	5.34982e-54	-0.419857	0.109	0.258	1.30428e-49	Superficial_Epithelial_0dpa_vs_1dpa	DEG
fbxl18	6.43676e-54	0.528596	0.182	0.041	1.56928e-49	Superficial_Epithelial_0dpa_vs_1dpa	DEG
grhl2a	6.59368e-54	-0.697514	0.074	0.198	1.60754e-49	Superficial_Epithelial_0dpa_vs_1dpa	DEG
rfx2	8.89162e-54	-0.509287	0.204	0.382	2.16778e-49	Superficial_Epithelial_0dpa_vs_1dpa	DEG
traf3	9.19151e-54	-0.470324	0.068	0.195	2.24089e-49	Superficial_Epithelial_0dpa_vs_1dpa	DEG
cox7a2a	1.35995e-53	-0.46121	0.12	0.273	3.31556e-49	Superficial_Epithelial_0dpa_vs_1dpa	DEG
efr3a	1.63722e-53	-0.58234	0.228	0.404	3.99153e-49	Superficial_Epithelial_0dpa_vs_1dpa	DEG
flna	1.82043e-53	-0.626503	0.104	0.244	4.43822e-49	Superficial_Epithelial_0dpa_vs_1dpa	DEG
spcs2	2.20448e-53	-0.341668	0.052	0.168	5.37452e-49	Superficial_Epithelial_0dpa_vs_1dpa	DEG
rbck1	2.73588e-53	-0.493612	0.139	0.296	6.67007e-49	Superficial_Epithelial_0dpa_vs_1dpa	DEG
rpn2	3.04553e-53	-0.426848	0.105	0.251	7.42501e-49	Superficial_Epithelial_0dpa_vs_1dpa	DEG
nccrp1	3.91457e-53	-0.441176	0.175	0.346	9.54372e-49	Superficial_Epithelial_0dpa_vs_1dpa	DEG
dusp8a	4.26247e-53	0.638581	0.373	0.197	1.03919e-48	Superficial_Epithelial_0dpa_vs_1dpa	DEG
si:dkeyp-85e10.3	4.46001e-53	-0.605112	0.111	0.254	1.08735e-48	Superficial_Epithelial_0dpa_vs_1dpa	DEG
hivep1	4.49285e-53	-0.472415	0.624	0.762	1.09536e-48	Superficial_Epithelial_0dpa_vs_1dpa	DEG
sem1	5.88099e-53	-0.46252	0.135	0.29	1.43379e-48	Superficial_Epithelial_0dpa_vs_1dpa	DEG
b4galt5	6.04986e-53	0.597127	0.462	0.282	1.47496e-48	Superficial_Epithelial_0dpa_vs_1dpa	DEG
plpp1a	6.30764e-53	0.514113	0.743	0.605	1.5378e-48	Superficial_Epithelial_0dpa_vs_1dpa	DEG
bcl3	6.94686e-53	-0.434184	0.027	0.12	1.69364e-48	Superficial_Epithelial_0dpa_vs_1dpa	DEG
ankrd11	7.60292e-53	0.541853	0.718	0.588	1.85359e-48	Superficial_Epithelial_0dpa_vs_1dpa	DEG
cox5ab	7.83543e-53	-0.382303	0.069	0.196	1.91028e-48	Superficial_Epithelial_0dpa_vs_1dpa	DEG
klf4	9.9242e-53	0.750759	0.679	0.526	2.41952e-48	Superficial_Epithelial_0dpa_vs_1dpa	DEG
trib1	1.00819e-52	0.615139	0.38	0.202	2.45798e-48	Superficial_Epithelial_0dpa_vs_1dpa	DEG
cx30.3	2.03727e-52	-0.564068	0.443	0.628	4.96686e-48	Superficial_Epithelial_0dpa_vs_1dpa	DEG
si:ch1073-303k11.2	2.12542e-52	-0.311904	0.025	0.115	5.18178e-48	Superficial_Epithelial_0dpa_vs_1dpa	DEG
tdh	2.5291e-52	0.584384	0.439	0.263	6.16596e-48	Superficial_Epithelial_0dpa_vs_1dpa	DEG
nectin1b	3.07628e-52	-0.761881	0.152	0.304	7.49996e-48	Superficial_Epithelial_0dpa_vs_1dpa	DEG
jhy	4.81356e-52	0.679132	0.152	0.026	1.17355e-47	Superficial_Epithelial_0dpa_vs_1dpa	DEG
ube2v2	5.48096e-52	-0.512928	0.246	0.423	1.33626e-47	Superficial_Epithelial_0dpa_vs_1dpa	DEG
hsd17b7	5.67321e-52	0.545157	0.203	0.059	1.38313e-47	Superficial_Epithelial_0dpa_vs_1dpa	DEG
fkbp1aa	9.40497e-52	-0.50891	0.213	0.382	2.29293e-47	Superficial_Epithelial_0dpa_vs_1dpa	DEG
col17a1b	1.24196e-51	-0.986944	0.143	0.293	3.02791e-47	Superficial_Epithelial_0dpa_vs_1dpa	DEG
fosab	1.34178e-51	0.665114	0.817	0.66	3.27127e-47	Superficial_Epithelial_0dpa_vs_1dpa	DEG
rhcgl1	2.39394e-51	-0.428424	0.684	0.84	5.83642e-47	Superficial_Epithelial_0dpa_vs_1dpa	DEG
utrn	2.5961e-51	0.498892	0.629	0.47	6.3293e-47	Superficial_Epithelial_0dpa_vs_1dpa	DEG
serpine1	3.06291e-51	-0.395696	0.023	0.111	7.46737e-47	Superficial_Epithelial_0dpa_vs_1dpa	DEG
b3gnt5a	3.28092e-51	0.564999	0.608	0.456	7.99889e-47	Superficial_Epithelial_0dpa_vs_1dpa	DEG
cd151l	3.82416e-51	-0.440562	0.096	0.232	9.3233e-47	Superficial_Epithelial_0dpa_vs_1dpa	DEG
si:dkey-188i13.9	3.88985e-51	-0.456985	0.073	0.199	9.48345e-47	Superficial_Epithelial_0dpa_vs_1dpa	DEG
glulb	4.40496e-51	0.399551	0.896	0.813	1.07393e-46	Superficial_Epithelial_0dpa_vs_1dpa	DEG
daxx	5.8772e-51	-0.507876	0.169	0.329	1.43286e-46	Superficial_Epithelial_0dpa_vs_1dpa	DEG
si:dkey-192d15.1	6.56914e-51	0.567763	0.197	0.056	1.60156e-46	Superficial_Epithelial_0dpa_vs_1dpa	DEG
psd3l	7.83266e-51	-0.491471	0.143	0.301	1.9096e-46	Superficial_Epithelial_0dpa_vs_1dpa	DEG
BX890624.2	1.0153e-50	0.555123	0.137	0.019	2.4753e-46	Superficial_Epithelial_0dpa_vs_1dpa	DEG
FP236157.6	1.03241e-50	0.584671	0.296	0.131	2.51702e-46	Superficial_Epithelial_0dpa_vs_1dpa	DEG
march8	1.17962e-50	0.498991	0.757	0.626	2.87592e-46	Superficial_Epithelial_0dpa_vs_1dpa	DEG
tspan37	1.3194e-50	-0.426177	0.096	0.231	3.21669e-46	Superficial_Epithelial_0dpa_vs_1dpa	DEG
erp44	1.42154e-50	-0.357684	0.08	0.21	3.46572e-46	Superficial_Epithelial_0dpa_vs_1dpa	DEG
nub1	1.54591e-50	-0.389416	0.064	0.183	3.76892e-46	Superficial_Epithelial_0dpa_vs_1dpa	DEG
sri	1.74374e-50	-0.36817	0.089	0.224	4.25124e-46	Superficial_Epithelial_0dpa_vs_1dpa	DEG
tmprss13a	1.7573e-50	0.518039	0.628	0.44	4.28429e-46	Superficial_Epithelial_0dpa_vs_1dpa	DEG
notch3	2.02192e-50	-0.648707	0.075	0.196	4.92943e-46	Superficial_Epithelial_0dpa_vs_1dpa	DEG
tomm34	2.09748e-50	-0.383418	0.084	0.215	5.11365e-46	Superficial_Epithelial_0dpa_vs_1dpa	DEG
slc7a5	4.19814e-50	0.584347	0.229	0.08	1.02351e-45	Superficial_Epithelial_0dpa_vs_1dpa	DEG
snrpe	5.12947e-50	-0.318923	0.046	0.153	1.25056e-45	Superficial_Epithelial_0dpa_vs_1dpa	DEG
cox4i1	5.58773e-50	-0.523127	0.326	0.5	1.36229e-45	Superficial_Epithelial_0dpa_vs_1dpa	DEG
psmb10	7.58902e-50	-0.414649	0.127	0.276	1.8502e-45	Superficial_Epithelial_0dpa_vs_1dpa	DEG
niban2a	8.25338e-50	0.357843	0.924	0.882	2.01217e-45	Superficial_Epithelial_0dpa_vs_1dpa	DEG
calm3a	9.49588e-50	-0.520325	0.39	0.567	2.3151e-45	Superficial_Epithelial_0dpa_vs_1dpa	DEG
si:dkey-40g16.6	1.07663e-49	-0.430855	0.137	0.291	2.62481e-45	Superficial_Epithelial_0dpa_vs_1dpa	DEG
ctsk	1.08974e-49	-0.464228	0.176	0.338	2.65678e-45	Superficial_Epithelial_0dpa_vs_1dpa	DEG
hsf2	1.21341e-49	-0.359567	0.085	0.217	2.95828e-45	Superficial_Epithelial_0dpa_vs_1dpa	DEG
tmem258	1.3257e-49	-0.480063	0.284	0.462	3.23205e-45	Superficial_Epithelial_0dpa_vs_1dpa	DEG
gstp1	1.33078e-49	-0.430613	0.087	0.216	3.24445e-45	Superficial_Epithelial_0dpa_vs_1dpa	DEG
grb7	1.79554e-49	0.596453	0.71	0.594	4.37753e-45	Superficial_Epithelial_0dpa_vs_1dpa	DEG
pdlim2	2.13437e-49	0.458819	0.921	0.872	5.20359e-45	Superficial_Epithelial_0dpa_vs_1dpa	DEG
ssr2	3.14301e-49	-0.494418	0.178	0.336	7.66266e-45	Superficial_Epithelial_0dpa_vs_1dpa	DEG
chac2	3.36116e-49	0.589052	0.489	0.309	8.19451e-45	Superficial_Epithelial_0dpa_vs_1dpa	DEG
eif4g3b	3.38447e-49	-0.415879	0.147	0.304	8.25134e-45	Superficial_Epithelial_0dpa_vs_1dpa	DEG
esrp2	3.9584e-49	-0.540043	0.345	0.521	9.65058e-45	Superficial_Epithelial_0dpa_vs_1dpa	DEG
otud4	8.28077e-49	-0.283277	0.022	0.106	2.01885e-44	Superficial_Epithelial_0dpa_vs_1dpa	DEG
cox6b1	9.46289e-49	-0.433753	0.081	0.207	2.30705e-44	Superficial_Epithelial_0dpa_vs_1dpa	DEG
smap1	1.15372e-48	0.359321	0.926	0.872	2.81277e-44	Superficial_Epithelial_0dpa_vs_1dpa	DEG
sec11a	1.4429e-48	-0.332695	0.065	0.183	3.5178e-44	Superficial_Epithelial_0dpa_vs_1dpa	DEG
plp2	1.73956e-48	-0.280754	0.025	0.111	4.24105e-44	Superficial_Epithelial_0dpa_vs_1dpa	DEG
eef1da	1.83578e-48	0.561134	0.423	0.259	4.47564e-44	Superficial_Epithelial_0dpa_vs_1dpa	DEG
ginm1	2.23103e-48	-0.343852	0.049	0.155	5.43925e-44	Superficial_Epithelial_0dpa_vs_1dpa	DEG
rabgap1l	2.4752e-48	0.556532	0.548	0.388	6.03454e-44	Superficial_Epithelial_0dpa_vs_1dpa	DEG
psmd8	2.5981e-48	-0.352288	0.076	0.2	6.33418e-44	Superficial_Epithelial_0dpa_vs_1dpa	DEG
si:ch211-245h14.1	3.10761e-48	-0.339404	0.059	0.173	7.57637e-44	Superficial_Epithelial_0dpa_vs_1dpa	DEG
foxo1b	3.29517e-48	0.615104	0.654	0.505	8.03362e-44	Superficial_Epithelial_0dpa_vs_1dpa	DEG
rnf19a	4.10206e-48	0.480133	0.813	0.704	1.00008e-43	Superficial_Epithelial_0dpa_vs_1dpa	DEG
myb	4.15621e-48	-0.473359	0.075	0.194	1.01329e-43	Superficial_Epithelial_0dpa_vs_1dpa	DEG
paqr5b	4.39516e-48	0.384425	0.893	0.778	1.07154e-43	Superficial_Epithelial_0dpa_vs_1dpa	DEG
si:dkey-188i13.10	5.5248e-48	-0.351428	0.067	0.186	1.34695e-43	Superficial_Epithelial_0dpa_vs_1dpa	DEG
myh9a	7.66726e-48	-0.587197	0.078	0.196	1.86928e-43	Superficial_Epithelial_0dpa_vs_1dpa	DEG
traf4b	8.82472e-48	-0.464873	0.102	0.237	2.15147e-43	Superficial_Epithelial_0dpa_vs_1dpa	DEG
tgfbr1a	9.4405e-48	-0.276531	0.02	0.1	2.30159e-43	Superficial_Epithelial_0dpa_vs_1dpa	DEG
ran	1.18488e-47	-0.467857	0.305	0.478	2.88873e-43	Superficial_Epithelial_0dpa_vs_1dpa	DEG
calm3b	1.1945e-47	-0.473107	0.376	0.551	2.91219e-43	Superficial_Epithelial_0dpa_vs_1dpa	DEG
prdx5	1.20488e-47	-0.51115	0.595	0.72	2.9375e-43	Superficial_Epithelial_0dpa_vs_1dpa	DEG
pfkfb3	1.2493e-47	0.631532	0.242	0.095	3.04578e-43	Superficial_Epithelial_0dpa_vs_1dpa	DEG
atp6v0ca	1.34503e-47	-0.459017	0.503	0.66	3.27919e-43	Superficial_Epithelial_0dpa_vs_1dpa	DEG
si:dkey-23k10.5	1.71577e-47	-0.370743	0.08	0.206	4.18305e-43	Superficial_Epithelial_0dpa_vs_1dpa	DEG
ccl20b	3.03077e-47	0.445777	0.122	0.014	7.38902e-43	Superficial_Epithelial_0dpa_vs_1dpa	DEG
fhl3a	3.29599e-47	-0.473358	0.124	0.269	8.03563e-43	Superficial_Epithelial_0dpa_vs_1dpa	DEG
itpkcb	3.836e-47	-0.432989	0.537	0.712	9.35217e-43	Superficial_Epithelial_0dpa_vs_1dpa	DEG
sema4ba	4.70257e-47	-0.513344	0.067	0.18	1.14649e-42	Superficial_Epithelial_0dpa_vs_1dpa	DEG
pdlim4	6.29832e-47	-0.376322	0.021	0.101	1.53553e-42	Superficial_Epithelial_0dpa_vs_1dpa	DEG
rhoab	7.1182e-47	-0.532516	0.461	0.621	1.73542e-42	Superficial_Epithelial_0dpa_vs_1dpa	DEG
id1	7.6898e-47	-0.521995	0.084	0.206	1.87477e-42	Superficial_Epithelial_0dpa_vs_1dpa	DEG
BX842240.1	8.13514e-47	-0.451418	0.119	0.258	1.98335e-42	Superficial_Epithelial_0dpa_vs_1dpa	DEG
slc43a1a	8.22204e-47	0.56588	0.483	0.324	2.00453e-42	Superficial_Epithelial_0dpa_vs_1dpa	DEG
reep3b	8.87701e-47	0.34217	0.954	0.914	2.16421e-42	Superficial_Epithelial_0dpa_vs_1dpa	DEG
si:ch73-236c18.8	1.4852e-46	0.505588	0.287	0.123	3.62091e-42	Superficial_Epithelial_0dpa_vs_1dpa	DEG
fam43a	1.49243e-46	0.458481	0.236	0.087	3.63853e-42	Superficial_Epithelial_0dpa_vs_1dpa	DEG
psmf1	1.56239e-46	-0.385812	0.078	0.2	3.80912e-42	Superficial_Epithelial_0dpa_vs_1dpa	DEG
mcm3	1.83539e-46	0.514011	0.264	0.113	4.47469e-42	Superficial_Epithelial_0dpa_vs_1dpa	DEG
sema4ab	1.94053e-46	-0.361137	0.038	0.132	4.73102e-42	Superficial_Epithelial_0dpa_vs_1dpa	DEG
sh3bp5la	2.14512e-46	0.561503	0.367	0.201	5.22981e-42	Superficial_Epithelial_0dpa_vs_1dpa	DEG
mical1	2.54798e-46	-0.468025	0.191	0.352	6.21198e-42	Superficial_Epithelial_0dpa_vs_1dpa	DEG
gpsm2	2.67194e-46	-0.312437	0.045	0.145	6.51418e-42	Superficial_Epithelial_0dpa_vs_1dpa	DEG
tnfrsf1a	2.71847e-46	-0.418602	0.192	0.353	6.62764e-42	Superficial_Epithelial_0dpa_vs_1dpa	DEG
gadd45ba	3.55266e-46	0.433116	0.565	0.374	8.66139e-42	Superficial_Epithelial_0dpa_vs_1dpa	DEG
slc30a7	3.77556e-46	-0.43641	0.146	0.294	9.2048e-42	Superficial_Epithelial_0dpa_vs_1dpa	DEG
serpinb1l3	4.50168e-46	0.489471	0.291	0.135	1.09751e-41	Superficial_Epithelial_0dpa_vs_1dpa	DEG
gosr2	5.51416e-46	-0.462983	0.142	0.285	1.34435e-41	Superficial_Epithelial_0dpa_vs_1dpa	DEG
bcas3	5.63302e-46	0.682537	0.393	0.236	1.37333e-41	Superficial_Epithelial_0dpa_vs_1dpa	DEG
si:ch211-214b16.4	7.34361e-46	-0.420907	0.067	0.181	1.79037e-41	Superficial_Epithelial_0dpa_vs_1dpa	DEG
fat2	8.56513e-46	-0.726732	0.105	0.228	2.08818e-41	Superficial_Epithelial_0dpa_vs_1dpa	DEG
uggt1	9.74668e-46	-0.443727	0.129	0.271	2.37624e-41	Superficial_Epithelial_0dpa_vs_1dpa	DEG
cnp	1.18618e-45	-0.257508	0.022	0.103	2.89191e-41	Superficial_Epithelial_0dpa_vs_1dpa	DEG
amd1	1.27303e-45	0.556554	0.392	0.233	3.10364e-41	Superficial_Epithelial_0dpa_vs_1dpa	DEG
furina	1.36977e-45	0.424649	0.875	0.802	3.33949e-41	Superficial_Epithelial_0dpa_vs_1dpa	DEG
tgm5l	1.49253e-45	0.356887	0.933	0.866	3.63878e-41	Superficial_Epithelial_0dpa_vs_1dpa	DEG
mrtfba	1.69857e-45	-0.366818	0.083	0.207	4.14113e-41	Superficial_Epithelial_0dpa_vs_1dpa	DEG
nabp1a	3.7116e-45	0.527233	0.228	0.09	9.04887e-41	Superficial_Epithelial_0dpa_vs_1dpa	DEG
tnk1	3.9897e-45	-0.513196	0.597	0.745	9.7269e-41	Superficial_Epithelial_0dpa_vs_1dpa	DEG
ENSDARG00000035679	3.99161e-45	-0.400054	0.128	0.269	9.73153e-41	Superficial_Epithelial_0dpa_vs_1dpa	DEG
si:dkey-102c8.3	4.13824e-45	-0.334171	0.039	0.133	1.0089e-40	Superficial_Epithelial_0dpa_vs_1dpa	DEG
slc4a2b	6.8539e-45	0.61077	0.297	0.147	1.67098e-40	Superficial_Epithelial_0dpa_vs_1dpa	DEG
zgc:113229	7.41737e-45	0.525878	0.494	0.32	1.80836e-40	Superficial_Epithelial_0dpa_vs_1dpa	DEG
runx3	1.05585e-44	0.563769	0.411	0.247	2.57417e-40	Superficial_Epithelial_0dpa_vs_1dpa	DEG
si:dkey-19a16.4	1.07575e-44	-0.524235	0.434	0.587	2.62268e-40	Superficial_Epithelial_0dpa_vs_1dpa	DEG
RAPH1	1.12326e-44	-0.418198	0.039	0.132	2.7385e-40	Superficial_Epithelial_0dpa_vs_1dpa	DEG
guk1a	1.30703e-44	0.553775	0.425	0.266	3.18653e-40	Superficial_Epithelial_0dpa_vs_1dpa	DEG
plekhg2	1.38312e-44	-0.364058	0.066	0.18	3.37206e-40	Superficial_Epithelial_0dpa_vs_1dpa	DEG
nkx3-1	1.50383e-44	0.517432	0.737	0.616	3.66633e-40	Superficial_Epithelial_0dpa_vs_1dpa	DEG
slc25a25a	1.63057e-44	0.502334	0.446	0.287	3.97534e-40	Superficial_Epithelial_0dpa_vs_1dpa	DEG
CU693379.1	1.72434e-44	0.495548	0.558	0.386	4.20394e-40	Superficial_Epithelial_0dpa_vs_1dpa	DEG
ms4a17a.5.1	2.9995e-44	-0.419819	0.123	0.258	7.31277e-40	Superficial_Epithelial_0dpa_vs_1dpa	DEG
ftr56	3.7578e-44	-0.357827	0.065	0.177	9.16152e-40	Superficial_Epithelial_0dpa_vs_1dpa	DEG
man2b1	3.93316e-44	-0.437851	0.128	0.266	9.58903e-40	Superficial_Epithelial_0dpa_vs_1dpa	DEG
cox6c	4.94273e-44	-0.456334	0.196	0.352	1.20504e-39	Superficial_Epithelial_0dpa_vs_1dpa	DEG
atp5mc3a	5.07474e-44	-0.387864	0.118	0.253	1.23722e-39	Superficial_Epithelial_0dpa_vs_1dpa	DEG
esyt2a	7.28589e-44	0.349871	0.925	0.879	1.7763e-39	Superficial_Epithelial_0dpa_vs_1dpa	DEG
rsl24d1	7.33842e-44	0.511919	0.306	0.155	1.78911e-39	Superficial_Epithelial_0dpa_vs_1dpa	DEG
zdhhc5a	7.99217e-44	-0.485697	0.315	0.486	1.94849e-39	Superficial_Epithelial_0dpa_vs_1dpa	DEG
tyk2	8.14501e-44	-0.503615	0.362	0.526	1.98575e-39	Superficial_Epithelial_0dpa_vs_1dpa	DEG
psmb13a	8.9217e-44	-0.37579	0.093	0.218	2.17511e-39	Superficial_Epithelial_0dpa_vs_1dpa	DEG
mpzl2b	9.58208e-44	-0.462491	0.271	0.434	2.33611e-39	Superficial_Epithelial_0dpa_vs_1dpa	DEG
rab5if	9.6039e-44	-0.254124	0.032	0.119	2.34143e-39	Superficial_Epithelial_0dpa_vs_1dpa	DEG
tnfrsf11b	1.04175e-43	0.634188	0.276	0.121	2.53978e-39	Superficial_Epithelial_0dpa_vs_1dpa	DEG
ndufa4l	1.29407e-43	-0.51849	0.446	0.582	3.15494e-39	Superficial_Epithelial_0dpa_vs_1dpa	DEG
gorasp2	1.54564e-43	-0.399926	0.174	0.327	3.76827e-39	Superficial_Epithelial_0dpa_vs_1dpa	DEG
LO018605.3	1.79495e-43	0.416248	0.114	0.013	4.3761e-39	Superficial_Epithelial_0dpa_vs_1dpa	DEG
nuak2	2.05275e-43	-0.548212	0.316	0.477	5.0046e-39	Superficial_Epithelial_0dpa_vs_1dpa	DEG
igf2bp2b	2.25137e-43	-0.388259	0.618	0.766	5.48883e-39	Superficial_Epithelial_0dpa_vs_1dpa	DEG
spag1a	2.473e-43	0.520112	0.576	0.433	6.02916e-39	Superficial_Epithelial_0dpa_vs_1dpa	DEG
fxr1	4.45694e-43	-0.378536	0.087	0.207	1.0866e-38	Superficial_Epithelial_0dpa_vs_1dpa	DEG
mt-nd3	5.68088e-43	0.259895	0.986	0.957	1.385e-38	Superficial_Epithelial_0dpa_vs_1dpa	DEG
si:dkey-247k7.2	6.68291e-43	-0.507234	0.987	0.958	1.62929e-38	Superficial_Epithelial_0dpa_vs_1dpa	DEG
acp6	6.99286e-43	-0.28389	0.042	0.137	1.70486e-38	Superficial_Epithelial_0dpa_vs_1dpa	DEG
pik3c2b	9.05481e-43	-0.319713	0.039	0.13	2.20756e-38	Superficial_Epithelial_0dpa_vs_1dpa	DEG
niban1a	1.07563e-42	0.313061	0.894	0.769	2.62239e-38	Superficial_Epithelial_0dpa_vs_1dpa	DEG
FO904966.2	1.17985e-42	0.547473	0.521	0.363	2.87648e-38	Superficial_Epithelial_0dpa_vs_1dpa	DEG
micall2b	1.19135e-42	-0.37473	0.068	0.178	2.90451e-38	Superficial_Epithelial_0dpa_vs_1dpa	DEG
junbb	1.57046e-42	0.513545	0.462	0.3	3.82877e-38	Superficial_Epithelial_0dpa_vs_1dpa	DEG
thrap3b	1.95687e-42	-0.409303	0.173	0.323	4.77086e-38	Superficial_Epithelial_0dpa_vs_1dpa	DEG
ube2h	2.1143e-42	-0.422903	0.149	0.29	5.15466e-38	Superficial_Epithelial_0dpa_vs_1dpa	DEG
psmd7	2.27559e-42	-0.368143	0.109	0.238	5.54789e-38	Superficial_Epithelial_0dpa_vs_1dpa	DEG
triob	2.51333e-42	-0.369169	0.116	0.251	6.12751e-38	Superficial_Epithelial_0dpa_vs_1dpa	DEG
CABZ01087224.1	2.79485e-42	0.516466	0.466	0.314	6.81384e-38	Superficial_Epithelial_0dpa_vs_1dpa	DEG
mob2a	3.03245e-42	-0.515343	0.339	0.502	7.39312e-38	Superficial_Epithelial_0dpa_vs_1dpa	DEG
mhc1uba	3.24306e-42	-0.350368	0.985	0.989	7.90659e-38	Superficial_Epithelial_0dpa_vs_1dpa	DEG
prkar2aa	3.30672e-42	-0.392616	0.108	0.235	8.06178e-38	Superficial_Epithelial_0dpa_vs_1dpa	DEG
ppp2r5eb	3.99788e-42	-0.432453	0.176	0.327	9.74684e-38	Superficial_Epithelial_0dpa_vs_1dpa	DEG
plscr3b	4.29699e-42	-0.4658	0.379	0.542	1.04761e-37	Superficial_Epithelial_0dpa_vs_1dpa	DEG
CR388207.1	5.35981e-42	-0.437219	0.118	0.249	1.30672e-37	Superficial_Epithelial_0dpa_vs_1dpa	DEG
vta1	6.12673e-42	-0.432775	0.393	0.566	1.4937e-37	Superficial_Epithelial_0dpa_vs_1dpa	DEG
ubr4	6.28547e-42	-0.454432	0.312	0.475	1.5324e-37	Superficial_Epithelial_0dpa_vs_1dpa	DEG
entpd6	6.74836e-42	0.49958	0.503	0.345	1.64525e-37	Superficial_Epithelial_0dpa_vs_1dpa	DEG
FP236157.5	7.94365e-42	0.456181	0.227	0.089	1.93666e-37	Superficial_Epithelial_0dpa_vs_1dpa	DEG
mhc2b	8.46466e-42	-0.713597	0.408	0.552	2.06368e-37	Superficial_Epithelial_0dpa_vs_1dpa	DEG
ppp5c	8.49274e-42	-0.352016	0.098	0.224	2.07053e-37	Superficial_Epithelial_0dpa_vs_1dpa	DEG
hsh2d	8.71425e-42	0.471264	0.277	0.129	2.12453e-37	Superficial_Epithelial_0dpa_vs_1dpa	DEG
tspan33a	9.37406e-42	-0.315269	0.047	0.143	2.2854e-37	Superficial_Epithelial_0dpa_vs_1dpa	DEG
zgc:152658	1.25753e-41	-0.453437	0.21	0.362	3.06585e-37	Superficial_Epithelial_0dpa_vs_1dpa	DEG
tmco1	1.70403e-41	-0.312124	0.059	0.163	4.15442e-37	Superficial_Epithelial_0dpa_vs_1dpa	DEG
map7d1a	1.81186e-41	-0.474312	0.205	0.353	4.41733e-37	Superficial_Epithelial_0dpa_vs_1dpa	DEG
atp5pb	1.82821e-41	-0.4287	0.166	0.309	4.45718e-37	Superficial_Epithelial_0dpa_vs_1dpa	DEG
s100u	1.93821e-41	-0.467939	0.247	0.403	4.72535e-37	Superficial_Epithelial_0dpa_vs_1dpa	DEG
pcp4a	2.52303e-41	0.633544	0.224	0.09	6.15115e-37	Superficial_Epithelial_0dpa_vs_1dpa	DEG
mat2aa	2.68706e-41	0.551699	0.43	0.282	6.55106e-37	Superficial_Epithelial_0dpa_vs_1dpa	DEG
pard3ba.1	3.10864e-41	0.428256	0.736	0.612	7.57887e-37	Superficial_Epithelial_0dpa_vs_1dpa	DEG
slco3a1	3.15443e-41	-0.437418	0.164	0.308	7.69049e-37	Superficial_Epithelial_0dpa_vs_1dpa	DEG
chmp4c	3.4511e-41	0.521401	0.586	0.44	8.41377e-37	Superficial_Epithelial_0dpa_vs_1dpa	DEG
bcl2l10	3.46794e-41	-0.279001	0.034	0.118	8.45484e-37	Superficial_Epithelial_0dpa_vs_1dpa	DEG
arhgdia	3.82934e-41	-0.389649	0.162	0.308	9.33593e-37	Superficial_Epithelial_0dpa_vs_1dpa	DEG
efna1b	3.91791e-41	-0.538051	0.288	0.442	9.55187e-37	Superficial_Epithelial_0dpa_vs_1dpa	DEG
aacs	4.36916e-41	0.650661	0.587	0.468	1.0652e-36	Superficial_Epithelial_0dpa_vs_1dpa	DEG
ppdpfb	4.54422e-41	-0.325806	0.063	0.168	1.10788e-36	Superficial_Epithelial_0dpa_vs_1dpa	DEG
ncalda	4.69541e-41	-0.317436	0.052	0.151	1.14474e-36	Superficial_Epithelial_0dpa_vs_1dpa	DEG
irf9	5.11458e-41	-0.450104	0.183	0.326	1.24694e-36	Superficial_Epithelial_0dpa_vs_1dpa	DEG
vasna	5.43197e-41	0.458939	0.215	0.083	1.32431e-36	Superficial_Epithelial_0dpa_vs_1dpa	DEG
erh	6.78486e-41	-0.38989	0.149	0.289	1.65415e-36	Superficial_Epithelial_0dpa_vs_1dpa	DEG
psmc5	6.90479e-41	-0.384955	0.152	0.295	1.68339e-36	Superficial_Epithelial_0dpa_vs_1dpa	DEG
usp11	8.48942e-41	-0.382984	0.117	0.247	2.06972e-36	Superficial_Epithelial_0dpa_vs_1dpa	DEG
homer3b	8.52502e-41	-0.317808	0.038	0.125	2.0784e-36	Superficial_Epithelial_0dpa_vs_1dpa	DEG
psip1b	9.96266e-41	0.501684	0.406	0.254	2.4289e-36	Superficial_Epithelial_0dpa_vs_1dpa	DEG
ppp1r13l	1.04478e-40	-0.47762	0.321	0.476	2.54718e-36	Superficial_Epithelial_0dpa_vs_1dpa	DEG
nfixa	1.11913e-40	0.558878	0.425	0.273	2.72844e-36	Superficial_Epithelial_0dpa_vs_1dpa	DEG
cacybp	1.20588e-40	-0.365371	0.111	0.239	2.93995e-36	Superficial_Epithelial_0dpa_vs_1dpa	DEG
cox6b2	2.06065e-40	-0.457358	0.267	0.423	5.02387e-36	Superficial_Epithelial_0dpa_vs_1dpa	DEG
ndufb6	2.41502e-40	-0.266841	0.041	0.131	5.88782e-36	Superficial_Epithelial_0dpa_vs_1dpa	DEG
psma6a	2.86279e-40	-0.259773	0.05	0.147	6.97947e-36	Superficial_Epithelial_0dpa_vs_1dpa	DEG
mpc1	2.90249e-40	-0.377441	0.129	0.262	7.07627e-36	Superficial_Epithelial_0dpa_vs_1dpa	DEG
psmd13	3.10404e-40	-0.314293	0.093	0.214	7.56764e-36	Superficial_Epithelial_0dpa_vs_1dpa	DEG
slc39a7	3.1355e-40	-0.289626	0.047	0.141	7.64436e-36	Superficial_Epithelial_0dpa_vs_1dpa	DEG
cert1a	3.17661e-40	-0.423568	0.105	0.226	7.74459e-36	Superficial_Epithelial_0dpa_vs_1dpa	DEG
smox	4.46084e-40	-0.547843	0.343	0.5	1.08755e-35	Superficial_Epithelial_0dpa_vs_1dpa	DEG
cgas	5.54019e-40	-0.577169	0.444	0.591	1.3507e-35	Superficial_Epithelial_0dpa_vs_1dpa	DEG
btbd11a	5.94727e-40	-0.469363	0.07	0.174	1.44994e-35	Superficial_Epithelial_0dpa_vs_1dpa	DEG
gcnt4a	6.80172e-40	0.46071	0.599	0.456	1.65826e-35	Superficial_Epithelial_0dpa_vs_1dpa	DEG
chmp1b	7.87168e-40	0.371371	0.851	0.778	1.91912e-35	Superficial_Epithelial_0dpa_vs_1dpa	DEG
atp5mf	9.054e-40	-0.397949	0.141	0.274	2.20736e-35	Superficial_Epithelial_0dpa_vs_1dpa	DEG
CABZ01055347.1	1.00509e-39	0.529656	0.305	0.16	2.45042e-35	Superficial_Epithelial_0dpa_vs_1dpa	DEG
gprc5c	1.02056e-39	-0.325453	0.044	0.134	2.48814e-35	Superficial_Epithelial_0dpa_vs_1dpa	DEG
FRMD1	1.17858e-39	-0.335926	0.052	0.147	2.87338e-35	Superficial_Epithelial_0dpa_vs_1dpa	DEG
COX5B.1	1.37004e-39	-0.454647	0.285	0.441	3.34015e-35	Superficial_Epithelial_0dpa_vs_1dpa	DEG
cldnk	1.38179e-39	0.508632	0.266	0.129	3.3688e-35	Superficial_Epithelial_0dpa_vs_1dpa	DEG
cnn3a	1.43174e-39	-0.423709	0.364	0.531	3.49059e-35	Superficial_Epithelial_0dpa_vs_1dpa	DEG
atp10b	1.45009e-39	0.380592	0.822	0.689	3.53531e-35	Superficial_Epithelial_0dpa_vs_1dpa	DEG
pik3r3b	1.61099e-39	0.513362	0.439	0.288	3.92759e-35	Superficial_Epithelial_0dpa_vs_1dpa	DEG
cldn23b	1.71818e-39	-0.44522	0.149	0.283	4.18891e-35	Superficial_Epithelial_0dpa_vs_1dpa	DEG
dhrs11a	1.72037e-39	0.578151	0.582	0.459	4.19425e-35	Superficial_Epithelial_0dpa_vs_1dpa	DEG
degs2	2.13623e-39	0.440255	0.631	0.492	5.20812e-35	Superficial_Epithelial_0dpa_vs_1dpa	DEG
abca1b	2.61702e-39	-0.283285	0.032	0.113	6.38031e-35	Superficial_Epithelial_0dpa_vs_1dpa	DEG
si:ch73-252p3.1	3.58453e-39	-0.30555	0.074	0.183	8.73908e-35	Superficial_Epithelial_0dpa_vs_1dpa	DEG
psmd14	3.68745e-39	-0.32418	0.093	0.211	8.99e-35	Superficial_Epithelial_0dpa_vs_1dpa	DEG
dusp1	4.60109e-39	0.559179	0.497	0.353	1.12175e-34	Superficial_Epithelial_0dpa_vs_1dpa	DEG
ppp1r15b	5.02195e-39	0.415641	0.134	0.03	1.22435e-34	Superficial_Epithelial_0dpa_vs_1dpa	DEG
irf2	5.3473e-39	-0.460996	0.268	0.422	1.30367e-34	Superficial_Epithelial_0dpa_vs_1dpa	DEG
nmt1a	6.0417e-39	-0.253579	0.054	0.152	1.47297e-34	Superficial_Epithelial_0dpa_vs_1dpa	DEG
ptbp1b	6.12508e-39	-0.406317	0.139	0.269	1.49329e-34	Superficial_Epithelial_0dpa_vs_1dpa	DEG
tbx3a	6.22773e-39	-0.601653	0.091	0.202	1.51832e-34	Superficial_Epithelial_0dpa_vs_1dpa	DEG
ms4a17a.1	6.71287e-39	-0.367044	0.11	0.234	1.6366e-34	Superficial_Epithelial_0dpa_vs_1dpa	DEG
erfl3	7.27076e-39	-0.435518	0.371	0.535	1.77261e-34	Superficial_Epithelial_0dpa_vs_1dpa	DEG
CU571315.3	7.3161e-39	0.429894	0.601	0.44	1.78367e-34	Superficial_Epithelial_0dpa_vs_1dpa	DEG
s100w	8.71558e-39	0.454494	0.549	0.392	2.12486e-34	Superficial_Epithelial_0dpa_vs_1dpa	DEG
anxa1a	8.75721e-39	-0.405349	0.883	0.911	2.13501e-34	Superficial_Epithelial_0dpa_vs_1dpa	DEG
mov10a	1.11895e-38	-0.359903	0.17	0.315	2.728e-34	Superficial_Epithelial_0dpa_vs_1dpa	DEG
ifih1	1.47721e-38	-0.35775	0.077	0.185	3.60144e-34	Superficial_Epithelial_0dpa_vs_1dpa	DEG
zgc:194948	1.52928e-38	-0.496617	0.105	0.221	3.72839e-34	Superficial_Epithelial_0dpa_vs_1dpa	DEG
zfand5a	2.20497e-38	0.40378	0.832	0.774	5.37572e-34	Superficial_Epithelial_0dpa_vs_1dpa	DEG
SMIM22	2.45502e-38	-0.35898	0.117	0.241	5.98535e-34	Superficial_Epithelial_0dpa_vs_1dpa	DEG
nucb1	2.4833e-38	-0.408381	0.238	0.388	6.05428e-34	Superficial_Epithelial_0dpa_vs_1dpa	DEG
adipor2	3.13953e-38	0.387056	0.843	0.751	7.65418e-34	Superficial_Epithelial_0dpa_vs_1dpa	DEG
per2	4.15825e-38	0.416663	0.75	0.636	1.01378e-33	Superficial_Epithelial_0dpa_vs_1dpa	DEG
junba	4.65682e-38	0.385094	0.804	0.686	1.13533e-33	Superficial_Epithelial_0dpa_vs_1dpa	DEG
hnrnph1l	4.93821e-38	-0.366288	0.11	0.232	1.20394e-33	Superficial_Epithelial_0dpa_vs_1dpa	DEG
cyp51	4.94527e-38	0.403884	0.146	0.039	1.20566e-33	Superficial_Epithelial_0dpa_vs_1dpa	DEG
col1a1b	4.98889e-38	-0.850894	0.052	0.142	1.21629e-33	Superficial_Epithelial_0dpa_vs_1dpa	DEG
klf2b	5.08042e-38	0.495794	0.593	0.45	1.23861e-33	Superficial_Epithelial_0dpa_vs_1dpa	DEG
si:busm1-194e12.11	5.89533e-38	-0.723398	0.398	0.524	1.43728e-33	Superficial_Epithelial_0dpa_vs_1dpa	DEG
myo3b	7.07614e-38	-0.378422	0.074	0.181	1.72516e-33	Superficial_Epithelial_0dpa_vs_1dpa	DEG
si:dkey-151g10.6	7.08603e-38	0.337529	0.83	0.719	1.72757e-33	Superficial_Epithelial_0dpa_vs_1dpa	DEG
PLEKHH3	7.8009e-38	0.43448	0.705	0.594	1.90186e-33	Superficial_Epithelial_0dpa_vs_1dpa	DEG
atp1b1a	1.0309e-37	-0.37782	0.655	0.765	2.51334e-33	Superficial_Epithelial_0dpa_vs_1dpa	DEG
ascc3	1.05537e-37	0.492639	0.295	0.157	2.57299e-33	Superficial_Epithelial_0dpa_vs_1dpa	DEG
atp6v0b	1.10638e-37	-0.325232	0.094	0.208	2.69735e-33	Superficial_Epithelial_0dpa_vs_1dpa	DEG
si:dkeyp-69e1.8	1.11763e-37	-0.254634	0.051	0.144	2.72477e-33	Superficial_Epithelial_0dpa_vs_1dpa	DEG
si:ch211-175f11.5	1.28402e-37	0.394403	0.142	0.037	3.13044e-33	Superficial_Epithelial_0dpa_vs_1dpa	DEG
zgc:92140	1.31309e-37	-0.430441	0.118	0.239	3.20131e-33	Superficial_Epithelial_0dpa_vs_1dpa	DEG
herc4	1.56139e-37	0.762797	0.319	0.18	3.80666e-33	Superficial_Epithelial_0dpa_vs_1dpa	DEG
mid2	1.62656e-37	-0.385025	0.077	0.182	3.96555e-33	Superficial_Epithelial_0dpa_vs_1dpa	DEG
si:ch73-24k9.2	1.67228e-37	0.409567	0.149	0.042	4.07702e-33	Superficial_Epithelial_0dpa_vs_1dpa	DEG
march5l	2.25653e-37	-0.281468	0.053	0.147	5.50143e-33	Superficial_Epithelial_0dpa_vs_1dpa	DEG
top2b	2.44695e-37	-0.430712	0.245	0.396	5.96567e-33	Superficial_Epithelial_0dpa_vs_1dpa	DEG
gabbr1a	2.68276e-37	0.455629	0.149	0.042	6.54057e-33	Superficial_Epithelial_0dpa_vs_1dpa	DEG
atp5pf	2.76188e-37	-0.410389	0.192	0.333	6.73347e-33	Superficial_Epithelial_0dpa_vs_1dpa	DEG
TANC2	2.80496e-37	0.494121	0.533	0.392	6.83848e-33	Superficial_Epithelial_0dpa_vs_1dpa	DEG
si:ch211-156p11.1.1	2.82715e-37	-0.477567	0.312	0.46	6.8926e-33	Superficial_Epithelial_0dpa_vs_1dpa	DEG
tbca	2.91854e-37	-0.263546	0.053	0.147	7.11541e-33	Superficial_Epithelial_0dpa_vs_1dpa	DEG
fam162a	3.06559e-37	-0.388078	0.18	0.321	7.47391e-33	Superficial_Epithelial_0dpa_vs_1dpa	DEG
gab2	3.1282e-37	0.55568	0.457	0.306	7.62654e-33	Superficial_Epithelial_0dpa_vs_1dpa	DEG
si:ch211-188p14.4	3.94858e-37	0.404516	0.187	0.068	9.62665e-33	Superficial_Epithelial_0dpa_vs_1dpa	DEG
si:ch73-335l21.4	4.19212e-37	0.611793	0.671	0.541	1.02204e-32	Superficial_Epithelial_0dpa_vs_1dpa	DEG
prkn	4.29364e-37	0.406382	0.128	0.029	1.04679e-32	Superficial_Epithelial_0dpa_vs_1dpa	DEG
atg9a	4.53349e-37	-0.373729	0.142	0.273	1.10526e-32	Superficial_Epithelial_0dpa_vs_1dpa	DEG
creb3l1	5.15995e-37	0.485875	0.565	0.431	1.258e-32	Superficial_Epithelial_0dpa_vs_1dpa	DEG
dusp19b	5.44896e-37	0.497708	0.262	0.128	1.32846e-32	Superficial_Epithelial_0dpa_vs_1dpa	DEG
slc25a33	5.49032e-37	0.475412	0.443	0.301	1.33854e-32	Superficial_Epithelial_0dpa_vs_1dpa	DEG
tmem54a	6.31705e-37	-0.416988	0.231	0.376	1.5401e-32	Superficial_Epithelial_0dpa_vs_1dpa	DEG
cd40	6.49721e-37	-0.340473	0.055	0.149	1.58402e-32	Superficial_Epithelial_0dpa_vs_1dpa	DEG
macc1	7.39068e-37	0.301424	0.959	0.919	1.80185e-32	Superficial_Epithelial_0dpa_vs_1dpa	DEG
inpp4ab	7.4904e-37	-0.3446	0.062	0.16	1.82616e-32	Superficial_Epithelial_0dpa_vs_1dpa	DEG
zgc:91890	7.61797e-37	0.423619	0.213	0.089	1.85726e-32	Superficial_Epithelial_0dpa_vs_1dpa	DEG
cnsta	7.79419e-37	-0.328657	0.061	0.159	1.90022e-32	Superficial_Epithelial_0dpa_vs_1dpa	DEG
chl1a	8.13016e-37	-0.498479	0.251	0.39	1.98213e-32	Superficial_Epithelial_0dpa_vs_1dpa	DEG
capn2b	8.65001e-37	0.472119	0.542	0.412	2.10887e-32	Superficial_Epithelial_0dpa_vs_1dpa	DEG
asph	8.8113e-37	-0.367572	0.09	0.2	2.14819e-32	Superficial_Epithelial_0dpa_vs_1dpa	DEG
fuca2	9.40031e-37	-0.439186	0.45	0.599	2.2918e-32	Superficial_Epithelial_0dpa_vs_1dpa	DEG
acvr1bb	1.10557e-36	-0.459849	0.122	0.241	2.69538e-32	Superficial_Epithelial_0dpa_vs_1dpa	DEG
slc9a5	1.38701e-36	0.472659	0.143	0.04	3.38152e-32	Superficial_Epithelial_0dpa_vs_1dpa	DEG
ehd1a	1.50769e-36	-0.450275	0.317	0.467	3.67576e-32	Superficial_Epithelial_0dpa_vs_1dpa	DEG
glod5	1.72403e-36	-0.252353	0.039	0.123	4.20318e-32	Superficial_Epithelial_0dpa_vs_1dpa	DEG
crb3a	1.7857e-36	0.518863	0.426	0.292	4.35353e-32	Superficial_Epithelial_0dpa_vs_1dpa	DEG
spcs3	1.82318e-36	-0.293832	0.061	0.158	4.44491e-32	Superficial_Epithelial_0dpa_vs_1dpa	DEG
ikzf2	1.98963e-36	0.551018	0.372	0.235	4.85073e-32	Superficial_Epithelial_0dpa_vs_1dpa	DEG
edem1	2.79566e-36	-0.409407	0.351	0.509	6.81583e-32	Superficial_Epithelial_0dpa_vs_1dpa	DEG
cdaa	2.90167e-36	-0.425277	0.114	0.232	7.07428e-32	Superficial_Epithelial_0dpa_vs_1dpa	DEG
psmd3	3.16974e-36	-0.334116	0.118	0.241	7.72782e-32	Superficial_Epithelial_0dpa_vs_1dpa	DEG
srebf2	3.24208e-36	0.484921	0.331	0.194	7.9042e-32	Superficial_Epithelial_0dpa_vs_1dpa	DEG
trarg1b	3.25609e-36	0.45136	0.173	0.06	7.93835e-32	Superficial_Epithelial_0dpa_vs_1dpa	DEG
dennd2b	3.30495e-36	-0.345432	0.056	0.148	8.05748e-32	Superficial_Epithelial_0dpa_vs_1dpa	DEG
ptpn3	3.41576e-36	-0.406596	0.168	0.302	8.32762e-32	Superficial_Epithelial_0dpa_vs_1dpa	DEG
anxa4	3.9426e-36	-0.306226	0.066	0.165	9.61206e-32	Superficial_Epithelial_0dpa_vs_1dpa	DEG
brd4	4.44646e-36	0.399114	0.702	0.588	1.08405e-31	Superficial_Epithelial_0dpa_vs_1dpa	DEG
trim35-24	4.70382e-36	-0.268265	0.028	0.102	1.14679e-31	Superficial_Epithelial_0dpa_vs_1dpa	DEG
tspan14	4.7833e-36	-0.347705	0.116	0.235	1.16617e-31	Superficial_Epithelial_0dpa_vs_1dpa	DEG
psmc6	4.91356e-36	-0.293897	0.093	0.207	1.19793e-31	Superficial_Epithelial_0dpa_vs_1dpa	DEG
tnrc18	5.51041e-36	0.493603	0.307	0.175	1.34344e-31	Superficial_Epithelial_0dpa_vs_1dpa	DEG
scinlb	6.21373e-36	0.374265	0.771	0.657	1.51491e-31	Superficial_Epithelial_0dpa_vs_1dpa	DEG
CU062645.1	6.35231e-36	0.458158	0.263	0.13	1.54869e-31	Superficial_Epithelial_0dpa_vs_1dpa	DEG
tanc1b	6.94399e-36	-0.663579	0.122	0.234	1.69294e-31	Superficial_Epithelial_0dpa_vs_1dpa	DEG
atp5fa1	9.42033e-36	-0.375269	0.228	0.376	2.29668e-31	Superficial_Epithelial_0dpa_vs_1dpa	DEG
atp5f1d	9.51622e-36	-0.347915	0.115	0.235	2.32006e-31	Superficial_Epithelial_0dpa_vs_1dpa	DEG
BX901923.2	9.62694e-36	0.44274	0.494	0.341	2.34705e-31	Superficial_Epithelial_0dpa_vs_1dpa	DEG
magi3b	1.11002e-35	0.448152	0.651	0.522	2.70624e-31	Superficial_Epithelial_0dpa_vs_1dpa	DEG
fth1a	1.28851e-35	-0.451536	0.737	0.796	3.14138e-31	Superficial_Epithelial_0dpa_vs_1dpa	DEG
ddi2	1.83071e-35	-0.298105	0.052	0.141	4.46327e-31	Superficial_Epithelial_0dpa_vs_1dpa	DEG
smarca1	2.39455e-35	0.340392	0.127	0.031	5.83791e-31	Superficial_Epithelial_0dpa_vs_1dpa	DEG
ywhah	2.44277e-35	-0.256669	0.052	0.142	5.95547e-31	Superficial_Epithelial_0dpa_vs_1dpa	DEG
stat2	3.07963e-35	-0.425895	0.506	0.637	7.50813e-31	Superficial_Epithelial_0dpa_vs_1dpa	DEG
adrb2a	3.14914e-35	0.478983	0.593	0.461	7.67759e-31	Superficial_Epithelial_0dpa_vs_1dpa	DEG
zgc:100868	3.80385e-35	0.654966	0.494	0.349	9.27379e-31	Superficial_Epithelial_0dpa_vs_1dpa	DEG
nox1	3.84375e-35	0.420851	0.47	0.317	9.37106e-31	Superficial_Epithelial_0dpa_vs_1dpa	DEG
psmc1a	5.58717e-35	-0.279101	0.069	0.168	1.36215e-30	Superficial_Epithelial_0dpa_vs_1dpa	DEG
chst11	9.87861e-35	-0.295673	0.044	0.127	2.40841e-30	Superficial_Epithelial_0dpa_vs_1dpa	DEG
erlec1	1.35966e-34	-0.262756	0.067	0.164	3.31486e-30	Superficial_Epithelial_0dpa_vs_1dpa	DEG
pparab	1.40446e-34	0.441652	0.29	0.156	3.42407e-30	Superficial_Epithelial_0dpa_vs_1dpa	DEG
smg1	1.44201e-34	-0.309984	0.094	0.204	3.51563e-30	Superficial_Epithelial_0dpa_vs_1dpa	DEG
raph1b	2.10457e-34	-0.286722	0.08	0.184	5.13095e-30	Superficial_Epithelial_0dpa_vs_1dpa	DEG
skp1	2.62376e-34	-0.389546	0.216	0.356	6.39673e-30	Superficial_Epithelial_0dpa_vs_1dpa	DEG
si:dkey-223p19.2	2.8233e-34	0.446904	0.155	0.051	6.8832e-30	Superficial_Epithelial_0dpa_vs_1dpa	DEG
slc1a5	4.20041e-34	0.436618	0.686	0.589	1.02406e-29	Superficial_Epithelial_0dpa_vs_1dpa	DEG
uba1	4.82689e-34	-0.390224	0.218	0.356	1.17679e-29	Superficial_Epithelial_0dpa_vs_1dpa	DEG
mfsd6a	5.00722e-34	0.396774	0.597	0.473	1.22076e-29	Superficial_Epithelial_0dpa_vs_1dpa	DEG
rab14	5.24745e-34	-0.370693	0.213	0.354	1.27933e-29	Superficial_Epithelial_0dpa_vs_1dpa	DEG
hrc.1	5.7317e-34	-0.471248	0.458	0.584	1.39739e-29	Superficial_Epithelial_0dpa_vs_1dpa	DEG
zfyve9a	5.83806e-34	0.617323	0.448	0.324	1.42332e-29	Superficial_Epithelial_0dpa_vs_1dpa	DEG
si:dkey-188i13.6	6.77797e-34	-0.422518	0.537	0.66	1.65247e-29	Superficial_Epithelial_0dpa_vs_1dpa	DEG
rac1a	7.00245e-34	-0.364181	0.278	0.433	1.7072e-29	Superficial_Epithelial_0dpa_vs_1dpa	DEG
cdipt	7.61077e-34	-0.309317	0.091	0.198	1.85551e-29	Superficial_Epithelial_0dpa_vs_1dpa	DEG
PKN2	8.69965e-34	-0.484726	0.34	0.484	2.12098e-29	Superficial_Epithelial_0dpa_vs_1dpa	DEG
BX927317.3	9.55676e-34	0.36477	0.202	0.082	2.32994e-29	Superficial_Epithelial_0dpa_vs_1dpa	DEG
klf11b	1.10235e-33	-0.380752	0.11	0.223	2.68753e-29	Superficial_Epithelial_0dpa_vs_1dpa	DEG
slc16a1b	1.19436e-33	-0.290941	0.065	0.159	2.91184e-29	Superficial_Epithelial_0dpa_vs_1dpa	DEG
cth	1.27837e-33	-0.308767	0.071	0.169	3.11668e-29	Superficial_Epithelial_0dpa_vs_1dpa	DEG
iqgap1	1.32098e-33	-0.404748	0.408	0.553	3.22054e-29	Superficial_Epithelial_0dpa_vs_1dpa	DEG
ptprfb	1.40532e-33	-0.277367	0.93	0.962	3.42618e-29	Superficial_Epithelial_0dpa_vs_1dpa	DEG
si:dkey-27n6.4	1.55061e-33	-0.449957	0.312	0.45	3.78039e-29	Superficial_Epithelial_0dpa_vs_1dpa	DEG
dspa	1.57381e-33	-0.254475	0.996	0.996	3.83696e-29	Superficial_Epithelial_0dpa_vs_1dpa	DEG
GCA	1.71073e-33	-0.382423	0.197	0.332	4.17077e-29	Superficial_Epithelial_0dpa_vs_1dpa	DEG
si:dkey-261l7.2	1.77566e-33	-0.319672	0.055	0.143	4.32905e-29	Superficial_Epithelial_0dpa_vs_1dpa	DEG
ece2b	2.1656e-33	0.440336	0.175	0.067	5.27972e-29	Superficial_Epithelial_0dpa_vs_1dpa	DEG
fam49a	2.44966e-33	-0.275673	0.048	0.131	5.97228e-29	Superficial_Epithelial_0dpa_vs_1dpa	DEG
kdm6ba	2.47385e-33	0.298891	0.94	0.889	6.03124e-29	Superficial_Epithelial_0dpa_vs_1dpa	DEG
gnpnat1	2.58592e-33	0.409133	0.631	0.515	6.30448e-29	Superficial_Epithelial_0dpa_vs_1dpa	DEG
bzw1b	2.6974e-33	0.412634	0.611	0.477	6.57627e-29	Superficial_Epithelial_0dpa_vs_1dpa	DEG
si:ch211-222l21.1	2.95575e-33	-0.51102	0.081	0.177	7.20613e-29	Superficial_Epithelial_0dpa_vs_1dpa	DEG
ufm1	3.07029e-33	-0.253177	0.053	0.141	7.48536e-29	Superficial_Epithelial_0dpa_vs_1dpa	DEG
tapbpl	3.09939e-33	-0.310074	0.112	0.226	7.55631e-29	Superficial_Epithelial_0dpa_vs_1dpa	DEG
ptpmt1	3.78568e-33	0.454422	0.403	0.262	9.2295e-29	Superficial_Epithelial_0dpa_vs_1dpa	DEG
suco	3.83901e-33	0.55237	0.508	0.393	9.35952e-29	Superficial_Epithelial_0dpa_vs_1dpa	DEG
fbxw7	4.17851e-33	-0.481778	0.555	0.681	1.01872e-28	Superficial_Epithelial_0dpa_vs_1dpa	DEG
urgcp	4.43466e-33	-0.341103	0.05	0.134	1.08117e-28	Superficial_Epithelial_0dpa_vs_1dpa	DEG
prr14	5.04642e-33	0.46815	0.235	0.116	1.23032e-28	Superficial_Epithelial_0dpa_vs_1dpa	DEG
snx9b	5.08591e-33	-0.338751	0.145	0.269	1.23995e-28	Superficial_Epithelial_0dpa_vs_1dpa	DEG
si:rp71-62i8.1	5.54369e-33	0.441078	0.357	0.222	1.35155e-28	Superficial_Epithelial_0dpa_vs_1dpa	DEG
tet1	5.83919e-33	-0.300291	0.095	0.202	1.4236e-28	Superficial_Epithelial_0dpa_vs_1dpa	DEG
egfra	6.62278e-33	-0.381126	0.662	0.767	1.61463e-28	Superficial_Epithelial_0dpa_vs_1dpa	DEG
sec24d	6.877e-33	0.459269	0.37	0.236	1.67661e-28	Superficial_Epithelial_0dpa_vs_1dpa	DEG
atp5l	7.12142e-33	-0.392916	0.219	0.354	1.7362e-28	Superficial_Epithelial_0dpa_vs_1dpa	DEG
fthl27	7.43447e-33	0.339712	0.794	0.676	1.81252e-28	Superficial_Epithelial_0dpa_vs_1dpa	DEG
rpl36a	7.44465e-33	0.333775	0.777	0.667	1.815e-28	Superficial_Epithelial_0dpa_vs_1dpa	DEG
tprn	1.14853e-32	0.479217	0.443	0.306	2.80012e-28	Superficial_Epithelial_0dpa_vs_1dpa	DEG
vti1a	1.3082e-32	0.413298	0.537	0.401	3.18938e-28	Superficial_Epithelial_0dpa_vs_1dpa	DEG
slf2	1.4863e-32	-0.272873	0.05	0.134	3.6236e-28	Superficial_Epithelial_0dpa_vs_1dpa	DEG
derl2	1.61356e-32	-0.26462	0.068	0.163	3.93386e-28	Superficial_Epithelial_0dpa_vs_1dpa	DEG
cdc6	1.66611e-32	0.436619	0.27	0.144	4.06199e-28	Superficial_Epithelial_0dpa_vs_1dpa	DEG
vasnb	1.80006e-32	-0.415439	0.116	0.227	4.38854e-28	Superficial_Epithelial_0dpa_vs_1dpa	DEG
si:ch73-181m17.1	1.92833e-32	0.390725	0.141	0.044	4.70126e-28	Superficial_Epithelial_0dpa_vs_1dpa	DEG
kif1b	1.93314e-32	-0.303394	0.068	0.162	4.713e-28	Superficial_Epithelial_0dpa_vs_1dpa	DEG
lrrc17	1.96734e-32	-0.34921	0.064	0.153	4.79638e-28	Superficial_Epithelial_0dpa_vs_1dpa	DEG
rab25a	2.00842e-32	-0.387761	0.36	0.506	4.89653e-28	Superficial_Epithelial_0dpa_vs_1dpa	DEG
alk	2.02283e-32	-0.328133	0.045	0.126	4.93166e-28	Superficial_Epithelial_0dpa_vs_1dpa	DEG
atp6v1ba	2.4174e-32	-0.32506	0.102	0.211	5.89363e-28	Superficial_Epithelial_0dpa_vs_1dpa	DEG
il15	2.64694e-32	0.379626	0.152	0.05	6.45323e-28	Superficial_Epithelial_0dpa_vs_1dpa	DEG
scube1	2.67219e-32	0.303194	0.1	0.018	6.5148e-28	Superficial_Epithelial_0dpa_vs_1dpa	DEG
rps28	2.73139e-32	0.379883	0.694	0.573	6.65914e-28	Superficial_Epithelial_0dpa_vs_1dpa	DEG
hif1ab	2.84923e-32	-0.405892	0.297	0.437	6.94643e-28	Superficial_Epithelial_0dpa_vs_1dpa	DEG
cd2bp2	3.52878e-32	-0.25614	0.062	0.153	8.60317e-28	Superficial_Epithelial_0dpa_vs_1dpa	DEG
mboat1	4.50867e-32	0.42923	0.63	0.52	1.09921e-27	Superficial_Epithelial_0dpa_vs_1dpa	DEG
arhgap5	5.42238e-32	-0.353805	0.174	0.301	1.32198e-27	Superficial_Epithelial_0dpa_vs_1dpa	DEG
ptpn13	5.88636e-32	0.293439	0.963	0.932	1.43509e-27	Superficial_Epithelial_0dpa_vs_1dpa	DEG
smdt1b	6.23605e-32	-0.378999	0.194	0.325	1.52035e-27	Superficial_Epithelial_0dpa_vs_1dpa	DEG
CR854839.1	6.26358e-32	0.450167	0.51	0.375	1.52706e-27	Superficial_Epithelial_0dpa_vs_1dpa	DEG
uqcrh	6.49039e-32	-0.264405	0.084	0.185	1.58236e-27	Superficial_Epithelial_0dpa_vs_1dpa	DEG
abi1a	6.71004e-32	-0.40085	0.542	0.655	1.63591e-27	Superficial_Epithelial_0dpa_vs_1dpa	DEG
ctss2.2	6.80112e-32	-0.425066	0.435	0.565	1.65811e-27	Superficial_Epithelial_0dpa_vs_1dpa	DEG
stk38a	6.99327e-32	-0.252674	0.054	0.139	1.70496e-27	Superficial_Epithelial_0dpa_vs_1dpa	DEG
atf6	7.62189e-32	-0.388511	0.195	0.325	1.85822e-27	Superficial_Epithelial_0dpa_vs_1dpa	DEG
tbc1d1	7.76925e-32	-0.309937	0.107	0.215	1.89414e-27	Superficial_Epithelial_0dpa_vs_1dpa	DEG
cxadr	7.85713e-32	-0.359571	0.788	0.873	1.91557e-27	Superficial_Epithelial_0dpa_vs_1dpa	DEG
MYO1D	7.90335e-32	0.668877	0.212	0.095	1.92684e-27	Superficial_Epithelial_0dpa_vs_1dpa	DEG
siah1	8.13835e-32	-0.346028	0.097	0.2	1.98413e-27	Superficial_Epithelial_0dpa_vs_1dpa	DEG
niban2b	8.27752e-32	-0.402811	0.098	0.2	2.01806e-27	Superficial_Epithelial_0dpa_vs_1dpa	DEG
ly75	8.88845e-32	-0.372258	0.315	0.462	2.167e-27	Superficial_Epithelial_0dpa_vs_1dpa	DEG
MDFIC	8.96283e-32	-0.373525	0.334	0.488	2.18514e-27	Superficial_Epithelial_0dpa_vs_1dpa	DEG
ptprub	1.06274e-31	-0.576417	0.109	0.214	2.59095e-27	Superficial_Epithelial_0dpa_vs_1dpa	DEG
psmd1	1.23551e-31	-0.356769	0.224	0.362	3.01218e-27	Superficial_Epithelial_0dpa_vs_1dpa	DEG
SLC35G1	1.62303e-31	0.376661	0.191	0.081	3.95695e-27	Superficial_Epithelial_0dpa_vs_1dpa	DEG
jmjd1cb	1.64946e-31	-0.349374	0.811	0.871	4.02139e-27	Superficial_Epithelial_0dpa_vs_1dpa	DEG
wu:fj29h11	1.77214e-31	-0.351914	0.644	0.744	4.32047e-27	Superficial_Epithelial_0dpa_vs_1dpa	DEG
pvrl2l	2.19361e-31	0.526961	0.641	0.553	5.34803e-27	Superficial_Epithelial_0dpa_vs_1dpa	DEG
pmm2	2.23856e-31	-0.332478	0.123	0.236	5.45761e-27	Superficial_Epithelial_0dpa_vs_1dpa	DEG
plcd1a	2.57795e-31	0.338763	0.86	0.79	6.28504e-27	Superficial_Epithelial_0dpa_vs_1dpa	DEG
nectin4a	2.58434e-31	-0.326591	0.765	0.837	6.30062e-27	Superficial_Epithelial_0dpa_vs_1dpa	DEG
ganab	2.6288e-31	-0.256614	0.079	0.178	6.40901e-27	Superficial_Epithelial_0dpa_vs_1dpa	DEG
itgb4	2.68903e-31	0.2876	0.354	0.196	6.55586e-27	Superficial_Epithelial_0dpa_vs_1dpa	DEG
snrpg	2.91456e-31	-0.25783	0.053	0.137	7.10569e-27	Superficial_Epithelial_0dpa_vs_1dpa	DEG
actr1	2.9301e-31	-0.261884	0.065	0.155	7.14359e-27	Superficial_Epithelial_0dpa_vs_1dpa	DEG
si:dkey-157l19.2	2.98523e-31	-0.365054	0.283	0.431	7.278e-27	Superficial_Epithelial_0dpa_vs_1dpa	DEG
erap1b	3.20034e-31	-0.332618	0.133	0.249	7.80244e-27	Superficial_Epithelial_0dpa_vs_1dpa	DEG
si:cabz01007812.1	3.33114e-31	-0.450666	0.268	0.401	8.12132e-27	Superficial_Epithelial_0dpa_vs_1dpa	DEG
hsbp1b	3.42392e-31	-0.285214	0.089	0.191	8.34751e-27	Superficial_Epithelial_0dpa_vs_1dpa	DEG
si:cabz01030277.1	3.54904e-31	-0.287594	0.074	0.167	8.65257e-27	Superficial_Epithelial_0dpa_vs_1dpa	DEG
kdelr2b	3.73382e-31	-0.331154	0.122	0.234	9.10306e-27	Superficial_Epithelial_0dpa_vs_1dpa	DEG
si:ch1073-340i21.2	3.92125e-31	-0.361882	0.101	0.205	9.56001e-27	Superficial_Epithelial_0dpa_vs_1dpa	DEG
atp5pd	4.39054e-31	-0.326681	0.118	0.229	1.07041e-26	Superficial_Epithelial_0dpa_vs_1dpa	DEG
copz2	5.92156e-31	0.479889	0.337	0.214	1.44368e-26	Superficial_Epithelial_0dpa_vs_1dpa	DEG
mfsd6b	6.49224e-31	0.581808	0.334	0.212	1.58281e-26	Superficial_Epithelial_0dpa_vs_1dpa	DEG
eif4h	7.54127e-31	-0.253834	0.075	0.17	1.83856e-26	Superficial_Epithelial_0dpa_vs_1dpa	DEG
pla2g4f.1	8.319e-31	0.439123	0.4	0.269	2.02817e-26	Superficial_Epithelial_0dpa_vs_1dpa	DEG
cdc42se1	8.35695e-31	-0.357595	0.151	0.269	2.03742e-26	Superficial_Epithelial_0dpa_vs_1dpa	DEG
casp6b.1	8.7104e-31	-0.33625	0.149	0.268	2.1236e-26	Superficial_Epithelial_0dpa_vs_1dpa	DEG
pla2g4f.2	8.71073e-31	0.561628	0.292	0.167	2.12368e-26	Superficial_Epithelial_0dpa_vs_1dpa	DEG
crhr1	9.99717e-31	0.347258	0.118	0.03	2.43731e-26	Superficial_Epithelial_0dpa_vs_1dpa	DEG
selenos	1.01054e-30	-0.378556	0.255	0.393	2.4637e-26	Superficial_Epithelial_0dpa_vs_1dpa	DEG
psmc3	1.06532e-30	-0.29655	0.114	0.224	2.59725e-26	Superficial_Epithelial_0dpa_vs_1dpa	DEG
asah1b	1.07897e-30	-0.323894	0.141	0.258	2.63053e-26	Superficial_Epithelial_0dpa_vs_1dpa	DEG
stat6	1.1307e-30	-0.363893	0.158	0.279	2.75665e-26	Superficial_Epithelial_0dpa_vs_1dpa	DEG
gpa33a	1.28244e-30	-0.389615	0.404	0.533	3.12659e-26	Superficial_Epithelial_0dpa_vs_1dpa	DEG
btr02	1.80072e-30	0.403833	0.62	0.504	4.39015e-26	Superficial_Epithelial_0dpa_vs_1dpa	DEG
ndfip2	2.26762e-30	-0.277406	0.062	0.148	5.52845e-26	Superficial_Epithelial_0dpa_vs_1dpa	DEG
uqcrc1	2.29005e-30	-0.314231	0.109	0.214	5.58314e-26	Superficial_Epithelial_0dpa_vs_1dpa	DEG
CABZ01015815.1	2.46287e-30	-0.419443	0.279	0.411	6.00447e-26	Superficial_Epithelial_0dpa_vs_1dpa	DEG
foxq1a	2.49426e-30	-0.515122	0.2	0.322	6.081e-26	Superficial_Epithelial_0dpa_vs_1dpa	DEG
vamp8	3.64067e-30	-0.44255	0.505	0.622	8.87594e-26	Superficial_Epithelial_0dpa_vs_1dpa	DEG
si:ch211-188p14.3	4.18064e-30	0.378682	0.194	0.086	1.01924e-25	Superficial_Epithelial_0dpa_vs_1dpa	DEG
psmc4	4.6776e-30	-0.303784	0.124	0.236	1.1404e-25	Superficial_Epithelial_0dpa_vs_1dpa	DEG
RPL37A	5.35416e-30	0.321897	0.764	0.65	1.30534e-25	Superficial_Epithelial_0dpa_vs_1dpa	DEG
txndc5	5.5085e-30	-0.275758	0.075	0.167	1.34297e-25	Superficial_Epithelial_0dpa_vs_1dpa	DEG
prelid3b	5.6812e-30	0.342137	0.681	0.578	1.38508e-25	Superficial_Epithelial_0dpa_vs_1dpa	DEG
plekha6	5.71588e-30	0.46322	0.603	0.48	1.39353e-25	Superficial_Epithelial_0dpa_vs_1dpa	DEG
rps29	5.98904e-30	0.340774	0.751	0.637	1.46013e-25	Superficial_Epithelial_0dpa_vs_1dpa	DEG
zfhx3	6.07417e-30	-0.462261	0.171	0.286	1.48088e-25	Superficial_Epithelial_0dpa_vs_1dpa	DEG
als2b	6.07783e-30	-0.302577	0.057	0.14	1.48177e-25	Superficial_Epithelial_0dpa_vs_1dpa	DEG
cblb	6.20882e-30	-0.303759	0.057	0.139	1.51371e-25	Superficial_Epithelial_0dpa_vs_1dpa	DEG
cxcl18a.1	6.28345e-30	-0.303395	0.073	0.164	1.53191e-25	Superficial_Epithelial_0dpa_vs_1dpa	DEG
hhla2a.2	6.85444e-30	0.397685	0.263	0.142	1.67111e-25	Superficial_Epithelial_0dpa_vs_1dpa	DEG
prkaa2	7.57691e-30	0.339859	0.123	0.035	1.84725e-25	Superficial_Epithelial_0dpa_vs_1dpa	DEG
atp5meb	7.71982e-30	-0.302047	0.104	0.208	1.88209e-25	Superficial_Epithelial_0dpa_vs_1dpa	DEG
txlna	8.69356e-30	-0.289973	0.103	0.207	2.11949e-25	Superficial_Epithelial_0dpa_vs_1dpa	DEG
si:dkey-23k10.2	8.82564e-30	-0.329435	0.104	0.207	2.15169e-25	Superficial_Epithelial_0dpa_vs_1dpa	DEG
cox5aa	9.78728e-30	-0.391019	0.258	0.39	2.38614e-25	Superficial_Epithelial_0dpa_vs_1dpa	DEG
klhl4	9.97138e-30	0.550713	0.265	0.149	2.43102e-25	Superficial_Epithelial_0dpa_vs_1dpa	DEG
sept8a	1.12118e-29	-0.383077	0.279	0.415	2.73343e-25	Superficial_Epithelial_0dpa_vs_1dpa	DEG
kank1a	1.13839e-29	0.544967	0.524	0.415	2.77539e-25	Superficial_Epithelial_0dpa_vs_1dpa	DEG
galnt6	1.43246e-29	-0.378391	0.446	0.586	3.49234e-25	Superficial_Epithelial_0dpa_vs_1dpa	DEG
si:ch211-160o17.4	1.55965e-29	-0.371914	0.27	0.405	3.80242e-25	Superficial_Epithelial_0dpa_vs_1dpa	DEG
syvn1	1.63099e-29	-0.290977	0.077	0.17	3.97635e-25	Superficial_Epithelial_0dpa_vs_1dpa	DEG
dusp22b	1.65543e-29	-0.27872	0.069	0.158	4.03594e-25	Superficial_Epithelial_0dpa_vs_1dpa	DEG
ube4b	1.66616e-29	-0.364981	0.188	0.313	4.06209e-25	Superficial_Epithelial_0dpa_vs_1dpa	DEG
adssl	1.8418e-29	-0.309671	0.132	0.246	4.49031e-25	Superficial_Epithelial_0dpa_vs_1dpa	DEG
dclk1a	1.94083e-29	0.444881	0.132	0.042	4.73174e-25	Superficial_Epithelial_0dpa_vs_1dpa	DEG
lpp	1.96631e-29	0.478103	0.428	0.3	4.79386e-25	Superficial_Epithelial_0dpa_vs_1dpa	DEG
klf6a	2.11181e-29	-0.429279	0.629	0.726	5.1486e-25	Superficial_Epithelial_0dpa_vs_1dpa	DEG
si:dkey-27o4.1	2.51377e-29	0.402256	0.258	0.14	6.12857e-25	Superficial_Epithelial_0dpa_vs_1dpa	DEG
psmc2	2.60256e-29	-0.279843	0.124	0.236	6.34504e-25	Superficial_Epithelial_0dpa_vs_1dpa	DEG
rgl3a	2.77977e-29	0.382379	0.572	0.438	6.77707e-25	Superficial_Epithelial_0dpa_vs_1dpa	DEG
si:dkey-87o1.2	3.60351e-29	-0.399759	0.724	0.783	8.78535e-25	Superficial_Epithelial_0dpa_vs_1dpa	DEG
neurl1aa	3.67788e-29	-0.355416	0.107	0.209	8.96667e-25	Superficial_Epithelial_0dpa_vs_1dpa	DEG
ncoa2	3.74029e-29	0.468754	0.491	0.379	9.11882e-25	Superficial_Epithelial_0dpa_vs_1dpa	DEG
nucb2b	3.87418e-29	-0.361855	0.13	0.237	9.44526e-25	Superficial_Epithelial_0dpa_vs_1dpa	DEG
CR382370.2	3.93014e-29	-0.340808	0.411	0.558	9.58167e-25	Superficial_Epithelial_0dpa_vs_1dpa	DEG
man1a1	4.70001e-29	0.371862	0.715	0.63	1.14586e-24	Superficial_Epithelial_0dpa_vs_1dpa	DEG
usp9	4.75506e-29	-0.37076	0.342	0.481	1.15928e-24	Superficial_Epithelial_0dpa_vs_1dpa	DEG
pnpla7a	4.83178e-29	0.502261	0.279	0.163	1.17799e-24	Superficial_Epithelial_0dpa_vs_1dpa	DEG
syncrip	6.41001e-29	-0.354211	0.236	0.368	1.56276e-24	Superficial_Epithelial_0dpa_vs_1dpa	DEG
arpc5a	6.51216e-29	-0.343614	0.264	0.403	1.58767e-24	Superficial_Epithelial_0dpa_vs_1dpa	DEG
deptor	7.286e-29	0.444158	0.286	0.167	1.77633e-24	Superficial_Epithelial_0dpa_vs_1dpa	DEG
epdl1	8.13807e-29	0.360595	0.184	0.081	1.98406e-24	Superficial_Epithelial_0dpa_vs_1dpa	DEG
naga	8.80882e-29	-0.396412	0.19	0.313	2.14759e-24	Superficial_Epithelial_0dpa_vs_1dpa	DEG
slc25a55a	9.28463e-29	0.342232	0.72	0.631	2.26359e-24	Superficial_Epithelial_0dpa_vs_1dpa	DEG
zgc:193541	9.41466e-29	-0.289097	0.134	0.247	2.29529e-24	Superficial_Epithelial_0dpa_vs_1dpa	DEG
CR788236.1	9.75259e-29	0.513815	0.324	0.201	2.37768e-24	Superficial_Epithelial_0dpa_vs_1dpa	DEG
arhgap17a	1.05103e-28	-0.461374	0.325	0.449	2.56241e-24	Superficial_Epithelial_0dpa_vs_1dpa	DEG
vps37b	1.06129e-28	-0.357419	0.169	0.29	2.58742e-24	Superficial_Epithelial_0dpa_vs_1dpa	DEG
ipo11	1.07337e-28	0.451681	0.243	0.131	2.61688e-24	Superficial_Epithelial_0dpa_vs_1dpa	DEG
sc:d0202.1	1.1137e-28	-0.278641	0.093	0.192	2.7152e-24	Superficial_Epithelial_0dpa_vs_1dpa	DEG
capn15	1.20252e-28	-0.402495	0.387	0.528	2.93173e-24	Superficial_Epithelial_0dpa_vs_1dpa	DEG
hhla2a.1	1.27635e-28	0.409421	0.618	0.528	3.11174e-24	Superficial_Epithelial_0dpa_vs_1dpa	DEG
fam172a	1.37506e-28	0.512919	0.283	0.168	3.3524e-24	Superficial_Epithelial_0dpa_vs_1dpa	DEG
gdi2	1.38398e-28	-0.361342	0.48	0.608	3.37415e-24	Superficial_Epithelial_0dpa_vs_1dpa	DEG
styk1a	1.39531e-28	0.367476	0.763	0.663	3.40178e-24	Superficial_Epithelial_0dpa_vs_1dpa	DEG
tmco6	1.7316e-28	0.443157	0.196	0.091	4.22163e-24	Superficial_Epithelial_0dpa_vs_1dpa	DEG
mindy3	1.78948e-28	0.631219	0.452	0.341	4.36276e-24	Superficial_Epithelial_0dpa_vs_1dpa	DEG
cd82a	1.84241e-28	-0.385122	0.286	0.418	4.4918e-24	Superficial_Epithelial_0dpa_vs_1dpa	DEG
bcl9l	1.86471e-28	0.474799	0.405	0.284	4.54617e-24	Superficial_Epithelial_0dpa_vs_1dpa	DEG
myo18aa	1.94165e-28	-0.37082	0.177	0.296	4.73373e-24	Superficial_Epithelial_0dpa_vs_1dpa	DEG
dicp1.1	2.14183e-28	0.329291	0.121	0.036	5.22178e-24	Superficial_Epithelial_0dpa_vs_1dpa	DEG
ppiaa	2.46905e-28	0.332583	0.829	0.736	6.01955e-24	Superficial_Epithelial_0dpa_vs_1dpa	DEG
pdzd11	2.80646e-28	0.344163	0.122	0.038	6.84215e-24	Superficial_Epithelial_0dpa_vs_1dpa	DEG
tubb4b	2.89402e-28	-0.436229	0.397	0.507	7.05562e-24	Superficial_Epithelial_0dpa_vs_1dpa	DEG
bsdc1	3.04312e-28	-0.283139	0.12	0.227	7.41913e-24	Superficial_Epithelial_0dpa_vs_1dpa	DEG
si:ch73-22o12.1	3.10285e-28	0.27185	0.975	0.965	7.56474e-24	Superficial_Epithelial_0dpa_vs_1dpa	DEG
si:dkey-242g16.2	3.1184e-28	0.345682	0.409	0.271	7.60266e-24	Superficial_Epithelial_0dpa_vs_1dpa	DEG
zgc:56525	3.26499e-28	-0.265852	0.118	0.225	7.96004e-24	Superficial_Epithelial_0dpa_vs_1dpa	DEG
atp5f1c	4.85056e-28	-0.273773	0.086	0.18	1.18257e-23	Superficial_Epithelial_0dpa_vs_1dpa	DEG
nfe2l1a	4.98038e-28	0.41105	0.461	0.343	1.21422e-23	Superficial_Epithelial_0dpa_vs_1dpa	DEG
jarid2b	5.97807e-28	0.41523	0.705	0.602	1.45745e-23	Superficial_Epithelial_0dpa_vs_1dpa	DEG
copb2	6.2642e-28	-0.345598	0.317	0.452	1.52721e-23	Superficial_Epithelial_0dpa_vs_1dpa	DEG
oclna	6.38996e-28	-0.351654	0.631	0.731	1.55787e-23	Superficial_Epithelial_0dpa_vs_1dpa	DEG
CR926130.2	6.43987e-28	-0.389931	0.378	0.531	1.57004e-23	Superficial_Epithelial_0dpa_vs_1dpa	DEG
unm-sa1506	8.11462e-28	0.34466	0.305	0.174	1.97835e-23	Superficial_Epithelial_0dpa_vs_1dpa	DEG
pargl	9.8459e-28	-0.334061	0.168	0.285	2.40043e-23	Superficial_Epithelial_0dpa_vs_1dpa	DEG
nfkbib	1.08394e-27	-0.257293	0.06	0.142	2.64266e-23	Superficial_Epithelial_0dpa_vs_1dpa	DEG
eif2ak2	1.23955e-27	-0.322182	0.101	0.199	3.02203e-23	Superficial_Epithelial_0dpa_vs_1dpa	DEG
tra2a	1.31543e-27	-0.324144	0.151	0.263	3.20701e-23	Superficial_Epithelial_0dpa_vs_1dpa	DEG
zgc:92313	1.38207e-27	-0.388278	0.332	0.464	3.36949e-23	Superficial_Epithelial_0dpa_vs_1dpa	DEG
igfbp1a	1.43597e-27	-0.544415	0.229	0.352	3.50088e-23	Superficial_Epithelial_0dpa_vs_1dpa	DEG
cav2	1.77368e-27	0.288033	0.106	0.028	4.32423e-23	Superficial_Epithelial_0dpa_vs_1dpa	DEG
arhgdig	1.85859e-27	-0.430519	0.561	0.663	4.53125e-23	Superficial_Epithelial_0dpa_vs_1dpa	DEG
wnt7ab	2.03777e-27	0.345481	0.146	0.055	4.96808e-23	Superficial_Epithelial_0dpa_vs_1dpa	DEG
capns1b	2.34265e-27	-0.334685	0.644	0.741	5.71138e-23	Superficial_Epithelial_0dpa_vs_1dpa	DEG
creb5a	2.37765e-27	0.413421	0.445	0.317	5.79671e-23	Superficial_Epithelial_0dpa_vs_1dpa	DEG
capza1a	2.47619e-27	-0.329948	0.237	0.365	6.03695e-23	Superficial_Epithelial_0dpa_vs_1dpa	DEG
nedd4a	2.99072e-27	0.374731	0.202	0.097	7.29138e-23	Superficial_Epithelial_0dpa_vs_1dpa	DEG
wnk1a	3.03334e-27	0.399665	0.64	0.552	7.39528e-23	Superficial_Epithelial_0dpa_vs_1dpa	DEG
itm2bb	3.05786e-27	-0.299369	0.659	0.766	7.45507e-23	Superficial_Epithelial_0dpa_vs_1dpa	DEG
ecm1b	3.33604e-27	0.677417	0.311	0.202	8.13327e-23	Superficial_Epithelial_0dpa_vs_1dpa	DEG
adgrf7	3.48026e-27	0.350823	0.259	0.141	8.48487e-23	Superficial_Epithelial_0dpa_vs_1dpa	DEG
abl2	3.92798e-27	-0.319028	0.125	0.23	9.57641e-23	Superficial_Epithelial_0dpa_vs_1dpa	DEG
vps35	3.93297e-27	-0.255636	0.102	0.2	9.58857e-23	Superficial_Epithelial_0dpa_vs_1dpa	DEG
dgat1b	5.37204e-27	-0.252204	0.043	0.112	1.3097e-22	Superficial_Epithelial_0dpa_vs_1dpa	DEG
anxa11b	5.61143e-27	-0.328536	0.284	0.42	1.36807e-22	Superficial_Epithelial_0dpa_vs_1dpa	DEG
prkcdb	5.84509e-27	0.292023	0.859	0.798	1.42503e-22	Superficial_Epithelial_0dpa_vs_1dpa	DEG
AL732488.2	6.03244e-27	0.387517	0.297	0.181	1.47071e-22	Superficial_Epithelial_0dpa_vs_1dpa	DEG
plekha5	6.12458e-27	-0.262008	0.082	0.172	1.49317e-22	Superficial_Epithelial_0dpa_vs_1dpa	DEG
kras	6.55613e-27	0.331079	0.753	0.66	1.59838e-22	Superficial_Epithelial_0dpa_vs_1dpa	DEG
nfil3-6	7.76593e-27	0.390826	0.186	0.086	1.89333e-22	Superficial_Epithelial_0dpa_vs_1dpa	DEG
rtn4a	8.49357e-27	-0.313714	0.112	0.211	2.07073e-22	Superficial_Epithelial_0dpa_vs_1dpa	DEG
gnpda2	8.92766e-27	-0.287871	0.08	0.167	2.17656e-22	Superficial_Epithelial_0dpa_vs_1dpa	DEG
ndufb8	1.00597e-26	-0.316494	0.152	0.265	2.45256e-22	Superficial_Epithelial_0dpa_vs_1dpa	DEG
pmaip1	1.24112e-26	-0.555078	0.263	0.385	3.02586e-22	Superficial_Epithelial_0dpa_vs_1dpa	DEG
saa	1.25384e-26	-0.295454	0.036	0.102	3.05686e-22	Superficial_Epithelial_0dpa_vs_1dpa	DEG
cntn1a	1.30507e-26	0.456986	0.338	0.223	3.18176e-22	Superficial_Epithelial_0dpa_vs_1dpa	DEG
lepr	1.54953e-26	0.464019	0.29	0.179	3.77776e-22	Superficial_Epithelial_0dpa_vs_1dpa	DEG
gfpt1	1.63739e-26	-0.352321	0.284	0.414	3.99195e-22	Superficial_Epithelial_0dpa_vs_1dpa	DEG
tmem39b	1.76193e-26	0.300272	0.126	0.042	4.29558e-22	Superficial_Epithelial_0dpa_vs_1dpa	DEG
rab1ab	1.77484e-26	-0.321093	0.386	0.521	4.32705e-22	Superficial_Epithelial_0dpa_vs_1dpa	DEG
bach2b	1.80957e-26	-0.288548	0.07	0.154	4.41173e-22	Superficial_Epithelial_0dpa_vs_1dpa	DEG
BX908797.1	2.18622e-26	0.332201	0.695	0.59	5.33e-22	Superficial_Epithelial_0dpa_vs_1dpa	DEG
osbpl3b	2.27867e-26	-0.291696	0.063	0.143	5.55539e-22	Superficial_Epithelial_0dpa_vs_1dpa	DEG
copb1	2.30117e-26	-0.315084	0.324	0.461	5.61025e-22	Superficial_Epithelial_0dpa_vs_1dpa	DEG
atrx	2.34603e-26	-0.349673	0.251	0.375	5.71962e-22	Superficial_Epithelial_0dpa_vs_1dpa	DEG
rnaseka	2.53537e-26	-0.254483	0.105	0.205	6.18124e-22	Superficial_Epithelial_0dpa_vs_1dpa	DEG
cdc42ep5	2.95858e-26	0.380263	0.708	0.611	7.21301e-22	Superficial_Epithelial_0dpa_vs_1dpa	DEG
rarres3	2.98341e-26	-0.429411	0.417	0.534	7.27356e-22	Superficial_Epithelial_0dpa_vs_1dpa	DEG
ikbkb	2.98673e-26	-0.279944	0.095	0.188	7.28165e-22	Superficial_Epithelial_0dpa_vs_1dpa	DEG
ddx3xa	3.25445e-26	0.34391	0.593	0.485	7.93434e-22	Superficial_Epithelial_0dpa_vs_1dpa	DEG
ube2l3a	3.3006e-26	-0.265491	0.103	0.2	8.04687e-22	Superficial_Epithelial_0dpa_vs_1dpa	DEG
si:dkey-16p6.1.12	3.34315e-26	0.310479	0.14	0.052	8.15059e-22	Superficial_Epithelial_0dpa_vs_1dpa	DEG
cyp3c3	4.24449e-26	0.475317	0.119	0.038	1.03481e-21	Superficial_Epithelial_0dpa_vs_1dpa	DEG
atf4a	4.37936e-26	0.365355	0.69	0.603	1.06769e-21	Superficial_Epithelial_0dpa_vs_1dpa	DEG
FO834828.2	6.21946e-26	0.264822	0.875	0.805	1.5163e-21	Superficial_Epithelial_0dpa_vs_1dpa	DEG
limk2	6.85269e-26	0.322955	0.72	0.621	1.67069e-21	Superficial_Epithelial_0dpa_vs_1dpa	DEG
osbpl3a	7.24773e-26	0.605974	0.803	0.753	1.767e-21	Superficial_Epithelial_0dpa_vs_1dpa	DEG
tmed7	9.11445e-26	-0.307337	0.155	0.265	2.2221e-21	Superficial_Epithelial_0dpa_vs_1dpa	DEG
galnt7	1.09497e-25	0.282663	0.902	0.862	2.66953e-21	Superficial_Epithelial_0dpa_vs_1dpa	DEG
cul3a	1.46449e-25	-0.290687	0.163	0.276	3.57044e-21	Superficial_Epithelial_0dpa_vs_1dpa	DEG
qkia	1.50614e-25	0.315662	0.753	0.655	3.67197e-21	Superficial_Epithelial_0dpa_vs_1dpa	DEG
fut8a	1.63045e-25	-0.383154	0.342	0.483	3.97503e-21	Superficial_Epithelial_0dpa_vs_1dpa	DEG
pcnx3	1.72298e-25	-0.296609	0.093	0.184	4.20063e-21	Superficial_Epithelial_0dpa_vs_1dpa	DEG
si:ch211-188p14.2	1.72882e-25	0.278639	0.13	0.046	4.21485e-21	Superficial_Epithelial_0dpa_vs_1dpa	DEG
CR589947.1	1.75813e-25	-0.334185	0.102	0.194	4.28633e-21	Superficial_Epithelial_0dpa_vs_1dpa	DEG
pak2a	1.76061e-25	-0.263455	0.092	0.182	4.29236e-21	Superficial_Epithelial_0dpa_vs_1dpa	DEG
noxo1a	1.76648e-25	0.338688	0.47	0.334	4.30669e-21	Superficial_Epithelial_0dpa_vs_1dpa	DEG
prrg2	2.01495e-25	-0.305252	0.229	0.352	4.91245e-21	Superficial_Epithelial_0dpa_vs_1dpa	DEG
psmd6	2.07389e-25	-0.265868	0.099	0.192	5.05614e-21	Superficial_Epithelial_0dpa_vs_1dpa	DEG
grasp	2.08653e-25	0.416965	0.336	0.217	5.08696e-21	Superficial_Epithelial_0dpa_vs_1dpa	DEG
slc20a2	2.45684e-25	0.438708	0.489	0.366	5.98978e-21	Superficial_Epithelial_0dpa_vs_1dpa	DEG
ndufc2	2.66675e-25	-0.278694	0.114	0.212	6.50153e-21	Superficial_Epithelial_0dpa_vs_1dpa	DEG
ctnnb1	2.80846e-25	-0.356964	0.282	0.399	6.84703e-21	Superficial_Epithelial_0dpa_vs_1dpa	DEG
GPR180	2.997e-25	0.341194	0.198	0.098	7.30669e-21	Superficial_Epithelial_0dpa_vs_1dpa	DEG
RPS17	3.29444e-25	0.310754	0.768	0.667	8.03185e-21	Superficial_Epithelial_0dpa_vs_1dpa	DEG
nab1b	4.18944e-25	0.439891	0.333	0.216	1.02139e-20	Superficial_Epithelial_0dpa_vs_1dpa	DEG
atp2a3	4.42709e-25	-0.294651	0.11	0.205	1.07932e-20	Superficial_Epithelial_0dpa_vs_1dpa	DEG
adgrg2a	4.55095e-25	0.369497	0.333	0.215	1.10952e-20	Superficial_Epithelial_0dpa_vs_1dpa	DEG
eif3jb	5.61794e-25	-0.303529	0.14	0.245	1.36965e-20	Superficial_Epithelial_0dpa_vs_1dpa	DEG
ndufa1	7.18197e-25	-0.282271	0.12	0.218	1.75096e-20	Superficial_Epithelial_0dpa_vs_1dpa	DEG
ywhae1	7.64159e-25	-0.270749	0.132	0.234	1.86302e-20	Superficial_Epithelial_0dpa_vs_1dpa	DEG
khnyn	7.94043e-25	-0.300931	0.122	0.221	1.93588e-20	Superficial_Epithelial_0dpa_vs_1dpa	DEG
ip6k2b	8.18032e-25	0.38468	0.462	0.352	1.99436e-20	Superficial_Epithelial_0dpa_vs_1dpa	DEG
tegt	8.30783e-25	-0.262556	0.124	0.225	2.02545e-20	Superficial_Epithelial_0dpa_vs_1dpa	DEG
zmp:0000000606	9.16944e-25	-0.360112	0.149	0.252	2.23551e-20	Superficial_Epithelial_0dpa_vs_1dpa	DEG
fuca1.1	9.82752e-25	-0.37174	0.185	0.294	2.39595e-20	Superficial_Epithelial_0dpa_vs_1dpa	DEG
kidins220a	1.08163e-24	0.434462	0.37	0.259	2.63701e-20	Superficial_Epithelial_0dpa_vs_1dpa	DEG
itpka	1.09418e-24	-0.389771	0.331	0.455	2.66761e-20	Superficial_Epithelial_0dpa_vs_1dpa	DEG
tspan36	1.10604e-24	-0.431235	0.37	0.494	2.69651e-20	Superficial_Epithelial_0dpa_vs_1dpa	DEG
CU856539.2	1.18509e-24	0.332727	0.864	0.8	2.88926e-20	Superficial_Epithelial_0dpa_vs_1dpa	DEG
stt3b	1.1947e-24	-0.28849	0.17	0.283	2.91268e-20	Superficial_Epithelial_0dpa_vs_1dpa	DEG
opn5	1.32091e-24	0.298384	0.102	0.029	3.22037e-20	Superficial_Epithelial_0dpa_vs_1dpa	DEG
psmd4a	1.39029e-24	-0.250044	0.081	0.166	3.38953e-20	Superficial_Epithelial_0dpa_vs_1dpa	DEG
SRMS	1.44802e-24	-0.371385	0.294	0.418	3.53028e-20	Superficial_Epithelial_0dpa_vs_1dpa	DEG
plcb3	1.48501e-24	-0.328328	0.45	0.581	3.62045e-20	Superficial_Epithelial_0dpa_vs_1dpa	DEG
anxa2a	1.52603e-24	-0.299334	0.863	0.888	3.72046e-20	Superficial_Epithelial_0dpa_vs_1dpa	DEG
srp68	1.58116e-24	0.308951	0.642	0.536	3.85486e-20	Superficial_Epithelial_0dpa_vs_1dpa	DEG
sfswap	1.59885e-24	0.395949	0.494	0.384	3.898e-20	Superficial_Epithelial_0dpa_vs_1dpa	DEG
ncor2	1.63693e-24	0.35881	0.605	0.519	3.99084e-20	Superficial_Epithelial_0dpa_vs_1dpa	DEG
si:ch211-15b10.6	1.77899e-24	-0.272283	0.06	0.135	4.33717e-20	Superficial_Epithelial_0dpa_vs_1dpa	DEG
ism1	1.81957e-24	0.338904	0.127	0.047	4.43612e-20	Superficial_Epithelial_0dpa_vs_1dpa	DEG
plekha7b	1.86101e-24	0.377378	0.246	0.138	4.53715e-20	Superficial_Epithelial_0dpa_vs_1dpa	DEG
cry2	1.87064e-24	-0.279138	0.136	0.238	4.56062e-20	Superficial_Epithelial_0dpa_vs_1dpa	DEG
ppiab	1.94194e-24	-0.32826	0.555	0.66	4.73444e-20	Superficial_Epithelial_0dpa_vs_1dpa	DEG
nr4a3	2.0136e-24	0.49744	0.434	0.324	4.90917e-20	Superficial_Epithelial_0dpa_vs_1dpa	DEG
dbpb	2.15385e-24	-0.403574	0.324	0.44	5.25108e-20	Superficial_Epithelial_0dpa_vs_1dpa	DEG
si:ch211-207n23.2	2.22269e-24	-0.413335	0.981	0.936	5.41892e-20	Superficial_Epithelial_0dpa_vs_1dpa	DEG
csnk1a1	2.29365e-24	-0.264452	0.708	0.792	5.59191e-20	Superficial_Epithelial_0dpa_vs_1dpa	DEG
tjp2a	2.49688e-24	-0.302704	0.221	0.34	6.08738e-20	Superficial_Epithelial_0dpa_vs_1dpa	DEG
jund	2.66276e-24	0.299659	0.842	0.764	6.49182e-20	Superficial_Epithelial_0dpa_vs_1dpa	DEG
kdelr2a	2.76132e-24	-0.31213	0.222	0.341	6.7321e-20	Superficial_Epithelial_0dpa_vs_1dpa	DEG
adka	2.8226e-24	-0.316053	0.091	0.177	6.88149e-20	Superficial_Epithelial_0dpa_vs_1dpa	DEG
lman2	3.13311e-24	-0.28142	0.159	0.267	7.63853e-20	Superficial_Epithelial_0dpa_vs_1dpa	DEG
mapk14a	3.25975e-24	-0.251215	0.067	0.144	7.94726e-20	Superficial_Epithelial_0dpa_vs_1dpa	DEG
CR848749.1	3.57013e-24	0.31957	0.835	0.777	8.70397e-20	Superficial_Epithelial_0dpa_vs_1dpa	DEG
zgc:158343	3.59325e-24	0.472592	0.662	0.559	8.76034e-20	Superficial_Epithelial_0dpa_vs_1dpa	DEG
lmna	4.06683e-24	0.300904	0.872	0.812	9.91492e-20	Superficial_Epithelial_0dpa_vs_1dpa	DEG
si:ch73-56d11.5	4.08486e-24	-0.327183	0.266	0.388	9.95889e-20	Superficial_Epithelial_0dpa_vs_1dpa	DEG
BX248521.1	4.38908e-24	-0.336977	0.161	0.266	1.07006e-19	Superficial_Epithelial_0dpa_vs_1dpa	DEG
mid1ip1b	4.95042e-24	0.361703	0.31	0.199	1.20691e-19	Superficial_Epithelial_0dpa_vs_1dpa	DEG
mcu	6.03343e-24	0.447552	0.405	0.299	1.47095e-19	Superficial_Epithelial_0dpa_vs_1dpa	DEG
rer1	6.35701e-24	-0.310222	0.294	0.422	1.54984e-19	Superficial_Epithelial_0dpa_vs_1dpa	DEG
rps6ka3a	6.65817e-24	-0.255827	0.113	0.207	1.62326e-19	Superficial_Epithelial_0dpa_vs_1dpa	DEG
SLC5A10	7.11461e-24	0.348091	0.224	0.124	1.73454e-19	Superficial_Epithelial_0dpa_vs_1dpa	DEG
csrnp1b	7.11778e-24	0.362797	0.357	0.242	1.73532e-19	Superficial_Epithelial_0dpa_vs_1dpa	DEG
CR855318.1	7.93592e-24	0.261272	0.114	0.038	1.93478e-19	Superficial_Epithelial_0dpa_vs_1dpa	DEG
rpl36	9.08293e-24	0.30031	0.723	0.624	2.21442e-19	Superficial_Epithelial_0dpa_vs_1dpa	DEG
tia1l	1.08147e-23	-0.273427	0.162	0.271	2.63661e-19	Superficial_Epithelial_0dpa_vs_1dpa	DEG
CABZ01046954.1	1.15416e-23	0.36886	0.264	0.156	2.81385e-19	Superficial_Epithelial_0dpa_vs_1dpa	DEG
gdpd3a	1.18765e-23	-0.330843	0.225	0.339	2.89549e-19	Superficial_Epithelial_0dpa_vs_1dpa	DEG
rab11fip4b	1.23237e-23	0.372163	0.169	0.08	3.00451e-19	Superficial_Epithelial_0dpa_vs_1dpa	DEG
max	1.26363e-23	-0.300565	0.212	0.328	3.08072e-19	Superficial_Epithelial_0dpa_vs_1dpa	DEG
fbp1a	1.29042e-23	0.302723	0.183	0.088	3.14605e-19	Superficial_Epithelial_0dpa_vs_1dpa	DEG
pde3b	1.69549e-23	0.364084	0.15	0.064	4.13359e-19	Superficial_Epithelial_0dpa_vs_1dpa	DEG
pkp2	1.69613e-23	0.366914	0.439	0.327	4.13517e-19	Superficial_Epithelial_0dpa_vs_1dpa	DEG
rtn3	1.71452e-23	-0.318088	0.669	0.737	4.18e-19	Superficial_Epithelial_0dpa_vs_1dpa	DEG
ano9b	2.10113e-23	-0.357793	0.358	0.477	5.12256e-19	Superficial_Epithelial_0dpa_vs_1dpa	DEG
usp47	2.28602e-23	-0.268841	0.118	0.212	5.57333e-19	Superficial_Epithelial_0dpa_vs_1dpa	DEG
anxa1b	2.38322e-23	-0.387861	0.783	0.817	5.81029e-19	Superficial_Epithelial_0dpa_vs_1dpa	DEG
jag2b	2.55487e-23	0.409674	0.129	0.051	6.22877e-19	Superficial_Epithelial_0dpa_vs_1dpa	DEG
lamc2	2.6196e-23	-0.467578	0.075	0.152	6.38658e-19	Superficial_Epithelial_0dpa_vs_1dpa	DEG
ccl27b	2.64363e-23	0.257748	0.102	0.031	6.44516e-19	Superficial_Epithelial_0dpa_vs_1dpa	DEG
si:ch211-132g1.3	3.0697e-23	-0.33645	0.188	0.294	7.48394e-19	Superficial_Epithelial_0dpa_vs_1dpa	DEG
slc17a9b	3.09657e-23	-0.265758	0.072	0.15	7.54943e-19	Superficial_Epithelial_0dpa_vs_1dpa	DEG
efnb2a	3.29118e-23	0.503411	0.368	0.266	8.02391e-19	Superficial_Epithelial_0dpa_vs_1dpa	DEG
ptgs2b	3.54409e-23	-0.321891	0.383	0.528	8.6405e-19	Superficial_Epithelial_0dpa_vs_1dpa	DEG
atp10a	3.80661e-23	0.397157	0.397	0.289	9.28053e-19	Superficial_Epithelial_0dpa_vs_1dpa	DEG
zbtb7a	3.83672e-23	0.379984	0.319	0.213	9.35392e-19	Superficial_Epithelial_0dpa_vs_1dpa	DEG
zgc:173737	4.09711e-23	-0.284551	0.155	0.259	9.98875e-19	Superficial_Epithelial_0dpa_vs_1dpa	DEG
dnajb6b	4.39304e-23	0.56598	0.383	0.284	1.07102e-18	Superficial_Epithelial_0dpa_vs_1dpa	DEG
si:ch211-158d24.4	4.42279e-23	0.630501	0.302	0.196	1.07828e-18	Superficial_Epithelial_0dpa_vs_1dpa	DEG
thrab	4.4283e-23	0.430322	0.17	0.082	1.07962e-18	Superficial_Epithelial_0dpa_vs_1dpa	DEG
si:dkey-74k8.3	4.69237e-23	0.339934	0.398	0.282	1.144e-18	Superficial_Epithelial_0dpa_vs_1dpa	DEG
hnrnpd	4.79471e-23	-0.298746	0.186	0.295	1.16895e-18	Superficial_Epithelial_0dpa_vs_1dpa	DEG
add3a	4.8067e-23	-0.289201	0.119	0.213	1.17187e-18	Superficial_Epithelial_0dpa_vs_1dpa	DEG
mbd2	5.29227e-23	0.346481	0.527	0.429	1.29026e-18	Superficial_Epithelial_0dpa_vs_1dpa	DEG
stap2a	6.11053e-23	0.350009	0.117	0.042	1.48975e-18	Superficial_Epithelial_0dpa_vs_1dpa	DEG
slc6a9	6.2347e-23	0.447032	0.46	0.344	1.52002e-18	Superficial_Epithelial_0dpa_vs_1dpa	DEG
FAM83G	6.54301e-23	0.360646	0.609	0.505	1.59519e-18	Superficial_Epithelial_0dpa_vs_1dpa	DEG
egr3	6.58812e-23	0.367303	0.249	0.145	1.60618e-18	Superficial_Epithelial_0dpa_vs_1dpa	DEG
zgc:162698	7.15559e-23	-0.302925	0.186	0.294	1.74453e-18	Superficial_Epithelial_0dpa_vs_1dpa	DEG
BX322574.1	7.36481e-23	-0.266137	0.121	0.216	1.79554e-18	Superficial_Epithelial_0dpa_vs_1dpa	DEG
si:dkey-33c12.4	7.49792e-23	-0.274898	0.152	0.257	1.82799e-18	Superficial_Epithelial_0dpa_vs_1dpa	DEG
hlfa	7.93781e-23	0.378299	0.351	0.24	1.93524e-18	Superficial_Epithelial_0dpa_vs_1dpa	DEG
ccdc171	9.1047e-23	0.363178	0.447	0.337	2.21973e-18	Superficial_Epithelial_0dpa_vs_1dpa	DEG
atp6ap1b	9.33301e-23	-0.281939	0.126	0.22	2.27539e-18	Superficial_Epithelial_0dpa_vs_1dpa	DEG
pir	1.13564e-22	0.319399	0.126	0.049	2.7687e-18	Superficial_Epithelial_0dpa_vs_1dpa	DEG
fxyd1	1.25614e-22	-0.316562	0.527	0.612	3.06247e-18	Superficial_Epithelial_0dpa_vs_1dpa	DEG
cx43.4	1.26217e-22	0.386825	0.642	0.55	3.07716e-18	Superficial_Epithelial_0dpa_vs_1dpa	DEG
dcaf12	1.45321e-22	0.377857	0.224	0.128	3.54292e-18	Superficial_Epithelial_0dpa_vs_1dpa	DEG
rab11al	1.57299e-22	0.394643	0.46	0.354	3.83494e-18	Superficial_Epithelial_0dpa_vs_1dpa	DEG
zgc:136963	1.59694e-22	-0.382238	0.391	0.499	3.89334e-18	Superficial_Epithelial_0dpa_vs_1dpa	DEG
ctsc	1.79852e-22	-0.323151	0.205	0.315	4.3848e-18	Superficial_Epithelial_0dpa_vs_1dpa	DEG
creb3l2	1.99251e-22	0.363048	0.29	0.186	4.85773e-18	Superficial_Epithelial_0dpa_vs_1dpa	DEG
slc2a1b	2.00071e-22	0.369381	0.572	0.473	4.87773e-18	Superficial_Epithelial_0dpa_vs_1dpa	DEG
si:ch211-153b23.4	2.01241e-22	-0.676248	0.279	0.378	4.90626e-18	Superficial_Epithelial_0dpa_vs_1dpa	DEG
dspb	2.12202e-22	0.353517	0.625	0.537	5.17348e-18	Superficial_Epithelial_0dpa_vs_1dpa	DEG
ptpn21	2.33213e-22	0.252822	0.756	0.651	5.68575e-18	Superficial_Epithelial_0dpa_vs_1dpa	DEG
zgc:100829	2.35871e-22	0.362529	0.625	0.545	5.75053e-18	Superficial_Epithelial_0dpa_vs_1dpa	DEG
mafk	2.4998e-22	0.318496	0.419	0.302	6.0945e-18	Superficial_Epithelial_0dpa_vs_1dpa	DEG
selenot2	2.53619e-22	-0.33214	0.306	0.425	6.18324e-18	Superficial_Epithelial_0dpa_vs_1dpa	DEG
chd4a	2.68199e-22	-0.28908	0.198	0.308	6.53868e-18	Superficial_Epithelial_0dpa_vs_1dpa	DEG
rabgap1l2	2.83262e-22	0.362062	0.379	0.269	6.90593e-18	Superficial_Epithelial_0dpa_vs_1dpa	DEG
cavin1a	2.94821e-22	0.317859	0.126	0.049	7.18774e-18	Superficial_Epithelial_0dpa_vs_1dpa	DEG
stam2	3.22651e-22	-0.293263	0.173	0.278	7.86623e-18	Superficial_Epithelial_0dpa_vs_1dpa	DEG
zmiz2	3.36969e-22	-0.321179	0.165	0.267	8.21531e-18	Superficial_Epithelial_0dpa_vs_1dpa	DEG
znf750	3.4196e-22	-0.297121	0.142	0.239	8.33698e-18	Superficial_Epithelial_0dpa_vs_1dpa	DEG
mcoln3a	3.55837e-22	0.277708	0.109	0.038	8.6753e-18	Superficial_Epithelial_0dpa_vs_1dpa	DEG
arnt2	3.98942e-22	0.362892	0.385	0.277	9.72621e-18	Superficial_Epithelial_0dpa_vs_1dpa	DEG
aff2	4.26355e-22	-0.264823	0.066	0.139	1.03945e-17	Superficial_Epithelial_0dpa_vs_1dpa	DEG
macf1a	4.30729e-22	0.35332	0.587	0.491	1.05012e-17	Superficial_Epithelial_0dpa_vs_1dpa	DEG
si:ch211-105j21.9	4.48227e-22	-0.305949	0.218	0.331	1.09278e-17	Superficial_Epithelial_0dpa_vs_1dpa	DEG
ube2d2	4.5125e-22	-0.321322	0.382	0.498	1.10015e-17	Superficial_Epithelial_0dpa_vs_1dpa	DEG
msmo1	4.59919e-22	0.337332	0.145	0.065	1.12128e-17	Superficial_Epithelial_0dpa_vs_1dpa	DEG
mknk1	4.63134e-22	0.364384	0.238	0.14	1.12912e-17	Superficial_Epithelial_0dpa_vs_1dpa	DEG
eif2s2	4.91399e-22	-0.275021	0.185	0.294	1.19803e-17	Superficial_Epithelial_0dpa_vs_1dpa	DEG
zgc:172075	5.26292e-22	0.352099	0.441	0.326	1.2831e-17	Superficial_Epithelial_0dpa_vs_1dpa	DEG
si:dkey-7j14.6	5.40483e-22	-0.340497	0.224	0.329	1.3177e-17	Superficial_Epithelial_0dpa_vs_1dpa	DEG
snrpb	5.42917e-22	-0.255585	0.111	0.201	1.32363e-17	Superficial_Epithelial_0dpa_vs_1dpa	DEG
cyfip1	5.47451e-22	-0.319656	0.363	0.481	1.33469e-17	Superficial_Epithelial_0dpa_vs_1dpa	DEG
il13ra1	5.62764e-22	-0.395029	0.518	0.625	1.37202e-17	Superficial_Epithelial_0dpa_vs_1dpa	DEG
fam83b	6.10711e-22	-0.33488	0.457	0.569	1.48891e-17	Superficial_Epithelial_0dpa_vs_1dpa	DEG
mgll	6.60247e-22	-0.317615	0.041	0.101	1.60968e-17	Superficial_Epithelial_0dpa_vs_1dpa	DEG
agap3	7.34154e-22	0.346138	0.648	0.553	1.78987e-17	Superficial_Epithelial_0dpa_vs_1dpa	DEG
krt96	8.33766e-22	-0.341198	0.233	0.352	2.03272e-17	Superficial_Epithelial_0dpa_vs_1dpa	DEG
fkbp4	8.76797e-22	-0.312333	0.175	0.278	2.13763e-17	Superficial_Epithelial_0dpa_vs_1dpa	DEG
CR936518.1	1.04357e-21	0.407122	0.208	0.115	2.54421e-17	Superficial_Epithelial_0dpa_vs_1dpa	DEG
acap3b	1.23177e-21	-0.364167	0.451	0.57	3.00305e-17	Superficial_Epithelial_0dpa_vs_1dpa	DEG
pawr	1.23856e-21	0.380746	0.616	0.521	3.01961e-17	Superficial_Epithelial_0dpa_vs_1dpa	DEG
si:ch211-195b13.1	1.49518e-21	-0.375212	0.18	0.278	3.64525e-17	Superficial_Epithelial_0dpa_vs_1dpa	DEG
rpl4	1.49776e-21	0.287357	0.687	0.59	3.65155e-17	Superficial_Epithelial_0dpa_vs_1dpa	DEG
ms4a17a.12	1.74759e-21	-0.268032	0.154	0.254	4.26064e-17	Superficial_Epithelial_0dpa_vs_1dpa	DEG
si:ch211-161h7.5	1.80954e-21	0.39178	0.164	0.079	4.41167e-17	Superficial_Epithelial_0dpa_vs_1dpa	DEG
tuba8l2	2.10572e-21	-0.318283	0.426	0.54	5.13374e-17	Superficial_Epithelial_0dpa_vs_1dpa	DEG
rpl22	2.36432e-21	0.304608	0.676	0.595	5.76422e-17	Superficial_Epithelial_0dpa_vs_1dpa	DEG
mctp2a	2.52489e-21	0.319627	0.534	0.429	6.15569e-17	Superficial_Epithelial_0dpa_vs_1dpa	DEG
casp9	2.57862e-21	-0.259173	0.073	0.147	6.28667e-17	Superficial_Epithelial_0dpa_vs_1dpa	DEG
n4bp1	2.635e-21	-0.344235	0.303	0.418	6.42412e-17	Superficial_Epithelial_0dpa_vs_1dpa	DEG
rel	2.68793e-21	0.37397	0.306	0.202	6.55317e-17	Superficial_Epithelial_0dpa_vs_1dpa	DEG
trpm4b.2	2.76388e-21	-0.317685	0.307	0.419	6.73835e-17	Superficial_Epithelial_0dpa_vs_1dpa	DEG
hexb	3.19547e-21	-0.309012	0.191	0.294	7.79056e-17	Superficial_Epithelial_0dpa_vs_1dpa	DEG
atp5if1b	3.23048e-21	-0.333081	0.238	0.346	7.87592e-17	Superficial_Epithelial_0dpa_vs_1dpa	DEG
rbms1a	3.30601e-21	-0.363556	0.446	0.559	8.06006e-17	Superficial_Epithelial_0dpa_vs_1dpa	DEG
uqcrfs1	3.63922e-21	-0.259386	0.137	0.233	8.87241e-17	Superficial_Epithelial_0dpa_vs_1dpa	DEG
ddx21	3.86487e-21	0.320629	0.203	0.113	9.42254e-17	Superficial_Epithelial_0dpa_vs_1dpa	DEG
rab7b	3.94688e-21	-0.254237	0.063	0.132	9.62248e-17	Superficial_Epithelial_0dpa_vs_1dpa	DEG
tcf7l1b	4.6811e-21	0.359419	0.181	0.095	1.14125e-16	Superficial_Epithelial_0dpa_vs_1dpa	DEG
usp7	4.76193e-21	0.370027	0.323	0.223	1.16096e-16	Superficial_Epithelial_0dpa_vs_1dpa	DEG
fryl	4.76752e-21	0.284003	0.809	0.766	1.16232e-16	Superficial_Epithelial_0dpa_vs_1dpa	DEG
tead3a	5.12713e-21	-0.254131	0.121	0.212	1.24999e-16	Superficial_Epithelial_0dpa_vs_1dpa	DEG
huwe1	5.72767e-21	-0.298926	0.313	0.43	1.39641e-16	Superficial_Epithelial_0dpa_vs_1dpa	DEG
srgap2	5.77605e-21	-0.280482	0.159	0.259	1.4082e-16	Superficial_Epithelial_0dpa_vs_1dpa	DEG
actr2a	6.02829e-21	-0.266022	0.18	0.285	1.4697e-16	Superficial_Epithelial_0dpa_vs_1dpa	DEG
rnasekb	6.04307e-21	-0.297046	0.162	0.258	1.4733e-16	Superficial_Epithelial_0dpa_vs_1dpa	DEG
mcf2l2	6.49512e-21	0.324509	0.169	0.085	1.58351e-16	Superficial_Epithelial_0dpa_vs_1dpa	DEG
thrap3a	6.9481e-21	0.397725	0.291	0.188	1.69395e-16	Superficial_Epithelial_0dpa_vs_1dpa	DEG
f3b	8.30039e-21	0.442697	0.125	0.051	2.02364e-16	Superficial_Epithelial_0dpa_vs_1dpa	DEG
elocb	8.87666e-21	-0.285274	0.189	0.292	2.16413e-16	Superficial_Epithelial_0dpa_vs_1dpa	DEG
BX465862.4	8.89505e-21	0.372911	0.383	0.275	2.16861e-16	Superficial_Epithelial_0dpa_vs_1dpa	DEG
tjp3	9.79511e-21	0.268299	0.889	0.868	2.38805e-16	Superficial_Epithelial_0dpa_vs_1dpa	DEG
ciarta	1.04854e-20	-0.252201	0.16	0.259	2.55633e-16	Superficial_Epithelial_0dpa_vs_1dpa	DEG
sgms2b	1.16024e-20	0.337098	0.283	0.183	2.82867e-16	Superficial_Epithelial_0dpa_vs_1dpa	DEG
actr2b	1.18904e-20	-0.28268	0.221	0.328	2.89888e-16	Superficial_Epithelial_0dpa_vs_1dpa	DEG
ankk1	1.32476e-20	0.27385	0.18	0.092	3.22976e-16	Superficial_Epithelial_0dpa_vs_1dpa	DEG
si:ch73-347e22.8	1.41319e-20	-0.3284	0.553	0.641	3.44535e-16	Superficial_Epithelial_0dpa_vs_1dpa	DEG
CR556713.1	1.46219e-20	0.372593	0.295	0.195	3.56481e-16	Superficial_Epithelial_0dpa_vs_1dpa	DEG
grhl1	1.56841e-20	-0.353453	0.401	0.512	3.82377e-16	Superficial_Epithelial_0dpa_vs_1dpa	DEG
rpl39	1.71907e-20	0.259329	0.771	0.671	4.19108e-16	Superficial_Epithelial_0dpa_vs_1dpa	DEG
rhbdf1a	1.96875e-20	-0.277566	0.295	0.413	4.79982e-16	Superficial_Epithelial_0dpa_vs_1dpa	DEG
strbp	2.05639e-20	0.322808	0.625	0.522	5.01348e-16	Superficial_Epithelial_0dpa_vs_1dpa	DEG
nt5c2b	2.46061e-20	0.337052	0.447	0.337	5.99897e-16	Superficial_Epithelial_0dpa_vs_1dpa	DEG
rhof	2.58215e-20	-0.319685	0.267	0.381	6.29528e-16	Superficial_Epithelial_0dpa_vs_1dpa	DEG
CABZ01068358.1	2.84818e-20	-0.382926	0.084	0.157	6.94385e-16	Superficial_Epithelial_0dpa_vs_1dpa	DEG
morc3a	2.89411e-20	-0.33045	0.323	0.436	7.05583e-16	Superficial_Epithelial_0dpa_vs_1dpa	DEG
slc35e4	2.96354e-20	-0.297008	0.203	0.307	7.22512e-16	Superficial_Epithelial_0dpa_vs_1dpa	DEG
tiam1a	3.32315e-20	0.254674	0.797	0.729	8.10185e-16	Superficial_Epithelial_0dpa_vs_1dpa	DEG
CU914622.2	3.36966e-20	-0.250326	0.633	0.739	8.21524e-16	Superficial_Epithelial_0dpa_vs_1dpa	DEG
uap1	3.78438e-20	-0.309543	0.291	0.406	9.22632e-16	Superficial_Epithelial_0dpa_vs_1dpa	DEG
zdhhc16a	3.96619e-20	0.338988	0.38	0.275	9.66958e-16	Superficial_Epithelial_0dpa_vs_1dpa	DEG
pcdh1b	4.21544e-20	0.25106	0.929	0.89	1.02772e-15	Superficial_Epithelial_0dpa_vs_1dpa	DEG
qrfpr4	4.65843e-20	0.289581	0.113	0.044	1.13572e-15	Superficial_Epithelial_0dpa_vs_1dpa	DEG
mrnip	5.18124e-20	0.350408	0.316	0.214	1.26319e-15	Superficial_Epithelial_0dpa_vs_1dpa	DEG
tm9sf2	5.39082e-20	-0.301427	0.505	0.612	1.31428e-15	Superficial_Epithelial_0dpa_vs_1dpa	DEG
rpl5a	5.59881e-20	-0.342188	0.394	0.494	1.36499e-15	Superficial_Epithelial_0dpa_vs_1dpa	DEG
mtmr3	5.66952e-20	-0.277286	0.15	0.244	1.38223e-15	Superficial_Epithelial_0dpa_vs_1dpa	DEG
tmed9	5.82431e-20	-0.273093	0.261	0.373	1.41997e-15	Superficial_Epithelial_0dpa_vs_1dpa	DEG
pptc7a	6.42149e-20	0.394721	0.506	0.42	1.56556e-15	Superficial_Epithelial_0dpa_vs_1dpa	DEG
cd74a	6.47359e-20	0.267412	0.987	0.968	1.57826e-15	Superficial_Epithelial_0dpa_vs_1dpa	DEG
pik3cb	6.63766e-20	0.319659	0.496	0.396	1.61826e-15	Superficial_Epithelial_0dpa_vs_1dpa	DEG
ldlra	7.18383e-20	0.39126	0.174	0.093	1.75142e-15	Superficial_Epithelial_0dpa_vs_1dpa	DEG
zgc:77486.1	7.90548e-20	0.301261	0.723	0.662	1.92736e-15	Superficial_Epithelial_0dpa_vs_1dpa	DEG
efl1	8.10688e-20	0.3361	0.161	0.081	1.97646e-15	Superficial_Epithelial_0dpa_vs_1dpa	DEG
ddx5	8.5332e-20	0.26663	0.797	0.731	2.08039e-15	Superficial_Epithelial_0dpa_vs_1dpa	DEG
cyp3c1	9.23314e-20	-0.274456	0.187	0.288	2.25104e-15	Superficial_Epithelial_0dpa_vs_1dpa	DEG
atp13a3	1.03121e-19	0.376958	0.434	0.342	2.5141e-15	Superficial_Epithelial_0dpa_vs_1dpa	DEG
rplp2	1.16952e-19	0.273162	0.827	0.766	2.85129e-15	Superficial_Epithelial_0dpa_vs_1dpa	DEG
camsap3	1.20472e-19	0.456709	0.424	0.335	2.93711e-15	Superficial_Epithelial_0dpa_vs_1dpa	DEG
hnrnpub	1.50958e-19	-0.308039	0.356	0.466	3.68035e-15	Superficial_Epithelial_0dpa_vs_1dpa	DEG
znfx1	1.57849e-19	-0.280071	0.307	0.424	3.84835e-15	Superficial_Epithelial_0dpa_vs_1dpa	DEG
pttg1ipa	1.83597e-19	-0.34414	0.369	0.472	4.4761e-15	Superficial_Epithelial_0dpa_vs_1dpa	DEG
tiparp	1.90868e-19	-0.341975	0.446	0.559	4.65336e-15	Superficial_Epithelial_0dpa_vs_1dpa	DEG
klf2a	1.97168e-19	-0.347895	0.251	0.359	4.80694e-15	Superficial_Epithelial_0dpa_vs_1dpa	DEG
si:dkey-217l24.1	2.36181e-19	0.279876	0.116	0.047	5.7581e-15	Superficial_Epithelial_0dpa_vs_1dpa	DEG
prodha	2.58652e-19	0.443077	0.44	0.348	6.30593e-15	Superficial_Epithelial_0dpa_vs_1dpa	DEG
ppp1r12a	2.9258e-19	-0.353411	0.308	0.415	7.1331e-15	Superficial_Epithelial_0dpa_vs_1dpa	DEG
st14a	3.12556e-19	-0.273381	0.542	0.653	7.62011e-15	Superficial_Epithelial_0dpa_vs_1dpa	DEG
ahr2	3.23832e-19	0.314343	0.566	0.479	7.89503e-15	Superficial_Epithelial_0dpa_vs_1dpa	DEG
csnk2b	3.32045e-19	-0.252971	0.157	0.25	8.09525e-15	Superficial_Epithelial_0dpa_vs_1dpa	DEG
nsa2	3.35142e-19	0.314107	0.242	0.15	8.17077e-15	Superficial_Epithelial_0dpa_vs_1dpa	DEG
ttll10	3.55296e-19	0.317206	0.161	0.081	8.66212e-15	Superficial_Epithelial_0dpa_vs_1dpa	DEG
MAGI3	3.55748e-19	0.314247	0.666	0.583	8.67314e-15	Superficial_Epithelial_0dpa_vs_1dpa	DEG
nrarpa	3.73123e-19	-0.421414	0.143	0.227	9.09674e-15	Superficial_Epithelial_0dpa_vs_1dpa	DEG
sik1	3.93926e-19	0.302512	0.79	0.71	9.60392e-15	Superficial_Epithelial_0dpa_vs_1dpa	DEG
ttc22	4.14612e-19	0.341554	0.318	0.222	1.01082e-14	Superficial_Epithelial_0dpa_vs_1dpa	DEG
si:ch1073-185p12.2	4.19274e-19	0.28107	0.126	0.055	1.02219e-14	Superficial_Epithelial_0dpa_vs_1dpa	DEG
per3	4.79011e-19	0.250207	0.713	0.617	1.16783e-14	Superficial_Epithelial_0dpa_vs_1dpa	DEG
mta1	5.35048e-19	0.312219	0.162	0.083	1.30445e-14	Superficial_Epithelial_0dpa_vs_1dpa	DEG
pkp1b	5.41564e-19	-0.286619	0.822	0.866	1.32033e-14	Superficial_Epithelial_0dpa_vs_1dpa	DEG
h2az2b	5.62457e-19	-0.250805	0.156	0.25	1.37127e-14	Superficial_Epithelial_0dpa_vs_1dpa	DEG
gsnb	6.15682e-19	-0.294665	0.366	0.474	1.50103e-14	Superficial_Epithelial_0dpa_vs_1dpa	DEG
bicdl2l	6.64626e-19	0.271819	0.798	0.73	1.62036e-14	Superficial_Epithelial_0dpa_vs_1dpa	DEG
mgat5	6.87785e-19	0.314223	0.592	0.512	1.67682e-14	Superficial_Epithelial_0dpa_vs_1dpa	DEG
bzw1a	8.0017e-19	-0.261814	0.192	0.291	1.95082e-14	Superficial_Epithelial_0dpa_vs_1dpa	DEG
si:ch211-223g7.2	8.61085e-19	-0.330367	0.223	0.322	2.09933e-14	Superficial_Epithelial_0dpa_vs_1dpa	DEG
dnaja2a	8.81905e-19	-0.275422	0.246	0.351	2.15009e-14	Superficial_Epithelial_0dpa_vs_1dpa	DEG
epn3a	1.02223e-18	-0.301294	0.18	0.275	2.4922e-14	Superficial_Epithelial_0dpa_vs_1dpa	DEG
ywhabb	1.10433e-18	-0.278798	0.339	0.454	2.69235e-14	Superficial_Epithelial_0dpa_vs_1dpa	DEG
trim8b	1.19453e-18	-0.273637	0.133	0.219	2.91228e-14	Superficial_Epithelial_0dpa_vs_1dpa	DEG
si:ch73-329n5.6	1.275e-18	0.31197	0.451	0.346	3.10845e-14	Superficial_Epithelial_0dpa_vs_1dpa	DEG
slc35a2	1.33289e-18	0.329602	0.257	0.166	3.24958e-14	Superficial_Epithelial_0dpa_vs_1dpa	DEG
ivns1abpb	1.40544e-18	0.251866	0.128	0.058	3.42645e-14	Superficial_Epithelial_0dpa_vs_1dpa	DEG
prdx1	1.53814e-18	0.343469	0.286	0.193	3.74998e-14	Superficial_Epithelial_0dpa_vs_1dpa	DEG
tubb2b	1.60683e-18	-0.254503	0.237	0.343	3.91745e-14	Superficial_Epithelial_0dpa_vs_1dpa	DEG
rab5c	1.65822e-18	-0.285843	0.446	0.553	4.04273e-14	Superficial_Epithelial_0dpa_vs_1dpa	DEG
cxcl18b	1.77792e-18	-0.403329	0.067	0.131	4.33457e-14	Superficial_Epithelial_0dpa_vs_1dpa	DEG
lonrf1l	1.99426e-18	-0.280702	0.208	0.308	4.86199e-14	Superficial_Epithelial_0dpa_vs_1dpa	DEG
zgc:174935	2.07386e-18	-0.328434	0.267	0.37	5.05607e-14	Superficial_Epithelial_0dpa_vs_1dpa	DEG
si:ch211-202h22.7	2.3625e-18	0.345955	0.297	0.202	5.75977e-14	Superficial_Epithelial_0dpa_vs_1dpa	DEG
si:ch73-340m8.2	2.47205e-18	-0.297135	0.188	0.283	6.02685e-14	Superficial_Epithelial_0dpa_vs_1dpa	DEG
irf1b	2.54992e-18	-0.497764	0.223	0.317	6.2167e-14	Superficial_Epithelial_0dpa_vs_1dpa	DEG
vps72b	2.8533e-18	0.252382	0.11	0.045	6.95636e-14	Superficial_Epithelial_0dpa_vs_1dpa	DEG
fdps	2.94684e-18	0.328867	0.113	0.048	7.18438e-14	Superficial_Epithelial_0dpa_vs_1dpa	DEG
eif1	3.04428e-18	0.253646	0.72	0.637	7.42196e-14	Superficial_Epithelial_0dpa_vs_1dpa	DEG
lats1	3.14947e-18	0.310993	0.235	0.148	7.6784e-14	Superficial_Epithelial_0dpa_vs_1dpa	DEG
tuba8l4	3.31915e-18	-0.319294	0.611	0.687	8.09209e-14	Superficial_Epithelial_0dpa_vs_1dpa	DEG
CR788311.1	3.42239e-18	0.258136	0.135	0.064	8.3438e-14	Superficial_Epithelial_0dpa_vs_1dpa	DEG
barx2	3.6103e-18	0.314796	0.355	0.252	8.8019e-14	Superficial_Epithelial_0dpa_vs_1dpa	DEG
mars1	3.66593e-18	0.375	0.375	0.284	8.93754e-14	Superficial_Epithelial_0dpa_vs_1dpa	DEG
sypl1	3.80949e-18	0.284696	0.122	0.054	9.28753e-14	Superficial_Epithelial_0dpa_vs_1dpa	DEG
lrba	3.89522e-18	0.28759	0.708	0.649	9.49655e-14	Superficial_Epithelial_0dpa_vs_1dpa	DEG
cope	3.92429e-18	-0.321412	0.279	0.384	9.56742e-14	Superficial_Epithelial_0dpa_vs_1dpa	DEG
ppp1caa	4.04772e-18	-0.274363	0.222	0.325	9.86834e-14	Superficial_Epithelial_0dpa_vs_1dpa	DEG
tmem45b	4.05206e-18	0.276292	0.515	0.416	9.87893e-14	Superficial_Epithelial_0dpa_vs_1dpa	DEG
uacab	4.79472e-18	0.347405	0.463	0.37	1.16895e-13	Superficial_Epithelial_0dpa_vs_1dpa	DEG
si:dkey-79f11.7	4.80736e-18	-0.337789	0.136	0.216	1.17203e-13	Superficial_Epithelial_0dpa_vs_1dpa	DEG
fam20ca	5.02119e-18	0.252211	0.132	0.061	1.22417e-13	Superficial_Epithelial_0dpa_vs_1dpa	DEG
hectd1	5.13021e-18	-0.275168	0.32	0.429	1.25075e-13	Superficial_Epithelial_0dpa_vs_1dpa	DEG
sun1	5.47262e-18	0.374426	0.345	0.253	1.33422e-13	Superficial_Epithelial_0dpa_vs_1dpa	DEG
avl9	6.14044e-18	0.356493	0.277	0.187	1.49704e-13	Superficial_Epithelial_0dpa_vs_1dpa	DEG
nfkbiab	6.69291e-18	0.331368	0.736	0.664	1.63173e-13	Superficial_Epithelial_0dpa_vs_1dpa	DEG
ankib1b	6.90164e-18	-0.261392	0.12	0.2	1.68262e-13	Superficial_Epithelial_0dpa_vs_1dpa	DEG
ank3b	7.15545e-18	0.358985	0.288	0.193	1.7445e-13	Superficial_Epithelial_0dpa_vs_1dpa	DEG
nocta	7.61752e-18	0.415363	0.571	0.501	1.85715e-13	Superficial_Epithelial_0dpa_vs_1dpa	DEG
sox6	9.25093e-18	0.347756	0.165	0.09	2.25538e-13	Superficial_Epithelial_0dpa_vs_1dpa	DEG
sec63	1.03447e-17	-0.262572	0.134	0.217	2.52204e-13	Superficial_Epithelial_0dpa_vs_1dpa	DEG
anxa1d	1.06144e-17	-0.285454	0.16	0.247	2.5878e-13	Superficial_Epithelial_0dpa_vs_1dpa	DEG
si:ch211-226h7.6	1.07006e-17	0.331791	0.122	0.055	2.6088e-13	Superficial_Epithelial_0dpa_vs_1dpa	DEG
srpra	1.09121e-17	0.347956	0.314	0.225	2.66036e-13	Superficial_Epithelial_0dpa_vs_1dpa	DEG
sik2b	1.10848e-17	0.345001	0.426	0.334	2.70246e-13	Superficial_Epithelial_0dpa_vs_1dpa	DEG
lrmda	1.11524e-17	0.416362	0.639	0.577	2.71896e-13	Superficial_Epithelial_0dpa_vs_1dpa	DEG
rps21	1.20552e-17	0.251316	0.778	0.711	2.93905e-13	Superficial_Epithelial_0dpa_vs_1dpa	DEG
cobll1b	1.24775e-17	-0.333204	0.421	0.53	3.04202e-13	Superficial_Epithelial_0dpa_vs_1dpa	DEG
per1b	1.58536e-17	-0.311555	0.333	0.433	3.8651e-13	Superficial_Epithelial_0dpa_vs_1dpa	DEG
mark2b	2.05085e-17	0.255381	0.787	0.741	4.99997e-13	Superficial_Epithelial_0dpa_vs_1dpa	DEG
chmp6b	2.095e-17	0.478751	0.292	0.207	5.10762e-13	Superficial_Epithelial_0dpa_vs_1dpa	DEG
cdc34a	2.47589e-17	0.39122	0.443	0.362	6.03622e-13	Superficial_Epithelial_0dpa_vs_1dpa	DEG
crfb12	2.74918e-17	0.274293	0.298	0.204	6.70251e-13	Superficial_Epithelial_0dpa_vs_1dpa	DEG
grb10b	2.86178e-17	-0.308207	0.162	0.249	6.97703e-13	Superficial_Epithelial_0dpa_vs_1dpa	DEG
si:ch211-264f5.6	2.90791e-17	0.33397	0.74	0.694	7.08949e-13	Superficial_Epithelial_0dpa_vs_1dpa	DEG
rbbp6	2.97276e-17	0.346744	0.48	0.399	7.24758e-13	Superficial_Epithelial_0dpa_vs_1dpa	DEG
maff	3.22028e-17	0.34822	0.352	0.266	7.85105e-13	Superficial_Epithelial_0dpa_vs_1dpa	DEG
nr4a1	3.48721e-17	0.369295	0.314	0.224	8.50183e-13	Superficial_Epithelial_0dpa_vs_1dpa	DEG
fndc3bb	3.76618e-17	-0.274077	0.299	0.411	9.18195e-13	Superficial_Epithelial_0dpa_vs_1dpa	DEG
mvp	3.77649e-17	0.384565	0.467	0.388	9.20708e-13	Superficial_Epithelial_0dpa_vs_1dpa	DEG
slc35f3a	4.01701e-17	0.336741	0.222	0.136	9.79346e-13	Superficial_Epithelial_0dpa_vs_1dpa	DEG
rab11fip1a	5.59693e-17	0.283141	0.659	0.579	1.36453e-12	Superficial_Epithelial_0dpa_vs_1dpa	DEG
tuba8l	6.73937e-17	-0.333576	0.419	0.516	1.64306e-12	Superficial_Epithelial_0dpa_vs_1dpa	DEG
capn2l	8.20527e-17	0.379685	0.413	0.319	2.00044e-12	Superficial_Epithelial_0dpa_vs_1dpa	DEG
kcnk5b	8.61306e-17	0.297216	0.192	0.112	2.09986e-12	Superficial_Epithelial_0dpa_vs_1dpa	DEG
klf13	9.02211e-17	-0.297383	0.177	0.267	2.19959e-12	Superficial_Epithelial_0dpa_vs_1dpa	DEG
ppt1	9.88133e-17	-0.260502	0.255	0.357	2.40907e-12	Superficial_Epithelial_0dpa_vs_1dpa	DEG
lgmn	1.04606e-16	-0.26874	0.173	0.262	2.55029e-12	Superficial_Epithelial_0dpa_vs_1dpa	DEG
chmp5b	1.07594e-16	-0.267704	0.676	0.748	2.62314e-12	Superficial_Epithelial_0dpa_vs_1dpa	DEG
camk2d1	1.11831e-16	0.373222	0.182	0.107	2.72644e-12	Superficial_Epithelial_0dpa_vs_1dpa	DEG
zgc:158263	1.23447e-16	-0.374194	0.276	0.369	3.00964e-12	Superficial_Epithelial_0dpa_vs_1dpa	DEG
slmapa	1.35575e-16	0.295596	0.542	0.469	3.30531e-12	Superficial_Epithelial_0dpa_vs_1dpa	DEG
calm1b	1.46333e-16	-0.295897	0.117	0.192	3.56759e-12	Superficial_Epithelial_0dpa_vs_1dpa	DEG
rpl38	1.62718e-16	0.261583	0.652	0.581	3.96707e-12	Superficial_Epithelial_0dpa_vs_1dpa	DEG
si:ch73-233k15.2	1.67675e-16	-0.25047	0.17	0.259	4.08792e-12	Superficial_Epithelial_0dpa_vs_1dpa	DEG
plekhn1	1.91999e-16	0.298473	0.562	0.49	4.68094e-12	Superficial_Epithelial_0dpa_vs_1dpa	DEG
si:dkeyp-1h4.6	2.11671e-16	-0.319122	0.793	0.803	5.16053e-12	Superficial_Epithelial_0dpa_vs_1dpa	DEG
tgfbr2b	2.18569e-16	0.345448	0.231	0.147	5.3287e-12	Superficial_Epithelial_0dpa_vs_1dpa	DEG
si:dkey-11o15.5	2.30692e-16	0.272789	0.108	0.047	5.62426e-12	Superficial_Epithelial_0dpa_vs_1dpa	DEG
ppp2r5a	2.43887e-16	0.384738	0.253	0.167	5.94597e-12	Superficial_Epithelial_0dpa_vs_1dpa	DEG
si:ch211-226h7.8	2.56677e-16	0.261573	0.119	0.055	6.25778e-12	Superficial_Epithelial_0dpa_vs_1dpa	DEG
plce1	2.68501e-16	0.351859	0.264	0.179	6.54606e-12	Superficial_Epithelial_0dpa_vs_1dpa	DEG
vwa5a	3.04931e-16	0.279983	0.329	0.239	7.43421e-12	Superficial_Epithelial_0dpa_vs_1dpa	DEG
igf1ra	4.6993e-16	-0.31351	0.102	0.17	1.14569e-11	Superficial_Epithelial_0dpa_vs_1dpa	DEG
cirbpb	4.96111e-16	0.265445	0.546	0.459	1.20952e-11	Superficial_Epithelial_0dpa_vs_1dpa	DEG
vdrb	5.18889e-16	0.330387	0.27	0.184	1.26505e-11	Superficial_Epithelial_0dpa_vs_1dpa	DEG
si:ch211-121a2.4	5.1944e-16	0.312049	0.565	0.479	1.2664e-11	Superficial_Epithelial_0dpa_vs_1dpa	DEG
mmd	5.49374e-16	0.3239	0.26	0.177	1.33937e-11	Superficial_Epithelial_0dpa_vs_1dpa	DEG
tns3.1	5.64602e-16	0.30716	0.206	0.126	1.3765e-11	Superficial_Epithelial_0dpa_vs_1dpa	DEG
nr1i2	6.26205e-16	0.29841	0.457	0.364	1.52669e-11	Superficial_Epithelial_0dpa_vs_1dpa	DEG
rpz2	6.37524e-16	0.315273	0.238	0.157	1.55428e-11	Superficial_Epithelial_0dpa_vs_1dpa	DEG
appa	7.27706e-16	0.29043	0.205	0.123	1.77415e-11	Superficial_Epithelial_0dpa_vs_1dpa	DEG
nos1apa	8.7225e-16	-0.268504	0.21	0.302	2.12655e-11	Superficial_Epithelial_0dpa_vs_1dpa	DEG
si:ch211-284f22.3	1.02629e-15	0.257031	0.141	0.073	2.50209e-11	Superficial_Epithelial_0dpa_vs_1dpa	DEG
enah	1.03797e-15	-0.392554	0.248	0.337	2.53056e-11	Superficial_Epithelial_0dpa_vs_1dpa	DEG
pkn1a	1.08389e-15	0.319583	0.487	0.404	2.64253e-11	Superficial_Epithelial_0dpa_vs_1dpa	DEG
rplp1	1.20146e-15	-0.357654	0.896	0.886	2.92916e-11	Superficial_Epithelial_0dpa_vs_1dpa	DEG
zgc:101731	1.24574e-15	0.289775	0.117	0.056	3.0371e-11	Superficial_Epithelial_0dpa_vs_1dpa	DEG
si:ch211-207e14.4	1.34094e-15	0.31097	0.238	0.16	3.26922e-11	Superficial_Epithelial_0dpa_vs_1dpa	DEG
si:dkey-182g1.2	1.52208e-15	-0.284371	0.392	0.487	3.71083e-11	Superficial_Epithelial_0dpa_vs_1dpa	DEG
BX936337.1	1.77567e-15	0.293641	0.424	0.336	4.32909e-11	Superficial_Epithelial_0dpa_vs_1dpa	DEG
epha2a	2.04787e-15	0.288542	0.555	0.468	4.9927e-11	Superficial_Epithelial_0dpa_vs_1dpa	DEG
creb1a	2.51064e-15	0.300383	0.147	0.081	6.12094e-11	Superficial_Epithelial_0dpa_vs_1dpa	DEG
pdcd6	2.60983e-15	0.405011	0.621	0.575	6.36276e-11	Superficial_Epithelial_0dpa_vs_1dpa	DEG
chn2	2.77194e-15	0.32386	0.392	0.301	6.75799e-11	Superficial_Epithelial_0dpa_vs_1dpa	DEG
si:dkey-20i20.15	2.88398e-15	0.317828	0.163	0.094	7.03113e-11	Superficial_Epithelial_0dpa_vs_1dpa	DEG
dlg1	2.91811e-15	0.297628	0.625	0.548	7.11435e-11	Superficial_Epithelial_0dpa_vs_1dpa	DEG
insrb	3.0283e-15	-0.259966	0.168	0.249	7.383e-11	Superficial_Epithelial_0dpa_vs_1dpa	DEG
zgc:162183	3.04617e-15	0.27954	0.349	0.263	7.42655e-11	Superficial_Epithelial_0dpa_vs_1dpa	DEG
csgalnact1a	3.05602e-15	0.253867	0.13	0.066	7.45058e-11	Superficial_Epithelial_0dpa_vs_1dpa	DEG
traf2b	3.51899e-15	-0.276883	0.31	0.409	8.5793e-11	Superficial_Epithelial_0dpa_vs_1dpa	DEG
lmbrd1	3.76701e-15	0.335692	0.352	0.269	9.18398e-11	Superficial_Epithelial_0dpa_vs_1dpa	DEG
zgc:92107	4.2869e-15	0.296977	0.304	0.218	1.04515e-10	Superficial_Epithelial_0dpa_vs_1dpa	DEG
rps7	5.2025e-15	-0.297635	0.772	0.788	1.26837e-10	Superficial_Epithelial_0dpa_vs_1dpa	DEG
ivns1abpa	5.33421e-15	0.27925	0.187	0.115	1.30048e-10	Superficial_Epithelial_0dpa_vs_1dpa	DEG
txnipa	5.45012e-15	-0.290593	0.116	0.187	1.32874e-10	Superficial_Epithelial_0dpa_vs_1dpa	DEG
peli1b	6.0168e-15	-0.274736	0.243	0.339	1.4669e-10	Superficial_Epithelial_0dpa_vs_1dpa	DEG
syngr2a	6.92781e-15	-0.264008	0.314	0.409	1.689e-10	Superficial_Epithelial_0dpa_vs_1dpa	DEG
coro2a	7.99971e-15	-0.287667	0.22	0.311	1.95033e-10	Superficial_Epithelial_0dpa_vs_1dpa	DEG
si:rp71-1h20.9	8.30237e-15	0.283728	0.259	0.177	2.02412e-10	Superficial_Epithelial_0dpa_vs_1dpa	DEG
si:ch211-282j22.3	9.13321e-15	0.30481	0.162	0.093	2.22668e-10	Superficial_Epithelial_0dpa_vs_1dpa	DEG
si:dkey-11o15.7	9.93072e-15	0.262258	0.328	0.234	2.42111e-10	Superficial_Epithelial_0dpa_vs_1dpa	DEG
bsg	1.17683e-14	-0.257385	0.34	0.432	2.86911e-10	Superficial_Epithelial_0dpa_vs_1dpa	DEG
shroom1	1.25165e-14	0.301456	0.407	0.324	3.05152e-10	Superficial_Epithelial_0dpa_vs_1dpa	DEG
rrbp1a	1.32322e-14	0.250369	0.74	0.68	3.226e-10	Superficial_Epithelial_0dpa_vs_1dpa	DEG
CU639469.1	1.33661e-14	0.292239	0.176	0.107	3.25865e-10	Superficial_Epithelial_0dpa_vs_1dpa	DEG
slc38a5b	1.44255e-14	0.295237	0.447	0.366	3.51694e-10	Superficial_Epithelial_0dpa_vs_1dpa	DEG
bada	1.53443e-14	0.252896	0.197	0.123	3.74093e-10	Superficial_Epithelial_0dpa_vs_1dpa	DEG
rbpjb	1.73136e-14	0.29312	0.131	0.07	4.22106e-10	Superficial_Epithelial_0dpa_vs_1dpa	DEG
tmprss4b	1.99807e-14	0.262709	0.165	0.096	4.8713e-10	Superficial_Epithelial_0dpa_vs_1dpa	DEG
rhoca	2.19324e-14	-0.255616	0.654	0.729	5.34712e-10	Superficial_Epithelial_0dpa_vs_1dpa	DEG
znf1148	2.22402e-14	0.252242	0.158	0.091	5.42216e-10	Superficial_Epithelial_0dpa_vs_1dpa	DEG
si:dkey-111e8.5	2.53058e-14	-0.25409	0.129	0.2	6.16956e-10	Superficial_Epithelial_0dpa_vs_1dpa	DEG
ano9a	2.53154e-14	0.31533	0.368	0.279	6.1719e-10	Superficial_Epithelial_0dpa_vs_1dpa	DEG
rps17	2.73469e-14	-0.289395	0.468	0.553	6.66718e-10	Superficial_Epithelial_0dpa_vs_1dpa	DEG
tsc22d3	2.84773e-14	-0.273128	0.157	0.233	6.94277e-10	Superficial_Epithelial_0dpa_vs_1dpa	DEG
pnp5b	3.1832e-14	0.292655	0.375	0.294	7.76064e-10	Superficial_Epithelial_0dpa_vs_1dpa	DEG
FO834828.1	3.19854e-14	0.364182	0.731	0.699	7.79804e-10	Superficial_Epithelial_0dpa_vs_1dpa	DEG
bcar3	3.31369e-14	0.288883	0.605	0.552	8.07877e-10	Superficial_Epithelial_0dpa_vs_1dpa	DEG
atp6v0a1a	3.43816e-14	0.265807	0.451	0.371	8.38222e-10	Superficial_Epithelial_0dpa_vs_1dpa	DEG
stx5a	4.02415e-14	0.268185	0.468	0.392	9.81087e-10	Superficial_Epithelial_0dpa_vs_1dpa	DEG
btr01	4.27842e-14	-0.265279	0.207	0.292	1.04308e-09	Superficial_Epithelial_0dpa_vs_1dpa	DEG
cdkn1bb	4.8468e-14	-0.270568	0.502	0.59	1.18165e-09	Superficial_Epithelial_0dpa_vs_1dpa	DEG
ccdc187	5.25822e-14	0.291939	0.379	0.3	1.28195e-09	Superficial_Epithelial_0dpa_vs_1dpa	DEG
ftr82	5.6463e-14	0.329922	0.462	0.388	1.37657e-09	Superficial_Epithelial_0dpa_vs_1dpa	DEG
bcl10	5.93837e-14	0.278008	0.241	0.165	1.44777e-09	Superficial_Epithelial_0dpa_vs_1dpa	DEG
hdac4	6.71204e-14	0.343572	0.638	0.569	1.6364e-09	Superficial_Epithelial_0dpa_vs_1dpa	DEG
myh9b	6.76448e-14	0.336798	0.784	0.762	1.64918e-09	Superficial_Epithelial_0dpa_vs_1dpa	DEG
rassf2a	7.01098e-14	0.321009	0.105	0.05	1.70928e-09	Superficial_Epithelial_0dpa_vs_1dpa	DEG
srfa	9.64269e-14	0.281811	0.176	0.108	2.35089e-09	Superficial_Epithelial_0dpa_vs_1dpa	DEG
slc6a16b	1.04411e-13	0.273078	0.159	0.094	2.54554e-09	Superficial_Epithelial_0dpa_vs_1dpa	DEG
rhobtb4	1.25319e-13	0.436331	0.274	0.198	3.05528e-09	Superficial_Epithelial_0dpa_vs_1dpa	DEG
rcan3	1.40105e-13	0.267852	0.317	0.232	3.41576e-09	Superficial_Epithelial_0dpa_vs_1dpa	DEG
snx29	1.72803e-13	0.281281	0.339	0.257	4.21293e-09	Superficial_Epithelial_0dpa_vs_1dpa	DEG
CR394535.1	1.82709e-13	0.278537	0.231	0.156	4.45443e-09	Superficial_Epithelial_0dpa_vs_1dpa	DEG
enosf1	1.84312e-13	-0.25833	0.11	0.174	4.49352e-09	Superficial_Epithelial_0dpa_vs_1dpa	DEG
si:ch73-50f9.4	1.86056e-13	-0.254975	0.166	0.241	4.53605e-09	Superficial_Epithelial_0dpa_vs_1dpa	DEG
arap1a	1.91629e-13	-0.26028	0.167	0.243	4.67191e-09	Superficial_Epithelial_0dpa_vs_1dpa	DEG
sox9b	2.08002e-13	0.259106	0.162	0.097	5.07108e-09	Superficial_Epithelial_0dpa_vs_1dpa	DEG
akap10	2.09655e-13	0.274928	0.126	0.068	5.11139e-09	Superficial_Epithelial_0dpa_vs_1dpa	DEG
supt3h	2.27582e-13	0.278143	0.163	0.1	5.54845e-09	Superficial_Epithelial_0dpa_vs_1dpa	DEG
slc9a2	2.4157e-13	0.252183	0.179	0.112	5.88948e-09	Superficial_Epithelial_0dpa_vs_1dpa	DEG
LO018166.1	2.645e-13	0.250869	0.271	0.19	6.4485e-09	Superficial_Epithelial_0dpa_vs_1dpa	DEG
klhl24b	2.78866e-13	0.281668	0.294	0.215	6.79875e-09	Superficial_Epithelial_0dpa_vs_1dpa	DEG
rpl11	3.49626e-13	-0.256915	0.714	0.739	8.52389e-09	Superficial_Epithelial_0dpa_vs_1dpa	DEG
esyt3	4.06079e-13	0.262242	0.518	0.441	9.9002e-09	Superficial_Epithelial_0dpa_vs_1dpa	DEG
parp11	5.11942e-13	-0.281357	0.264	0.348	1.24811e-08	Superficial_Epithelial_0dpa_vs_1dpa	DEG
inavab	5.24575e-13	-0.274993	0.349	0.44	1.27892e-08	Superficial_Epithelial_0dpa_vs_1dpa	DEG
cecr2	6.04801e-13	0.268235	0.438	0.366	1.47451e-08	Superficial_Epithelial_0dpa_vs_1dpa	DEG
sox19a	6.08199e-13	-0.270769	0.093	0.151	1.48279e-08	Superficial_Epithelial_0dpa_vs_1dpa	DEG
ddx61	6.72836e-13	-0.2583	0.387	0.471	1.64037e-08	Superficial_Epithelial_0dpa_vs_1dpa	DEG
si:dkey-100n23.3	6.93873e-13	0.274728	0.201	0.132	1.69166e-08	Superficial_Epithelial_0dpa_vs_1dpa	DEG
si:ch211-233a24.2	7.11909e-13	-0.270465	0.443	0.528	1.73563e-08	Superficial_Epithelial_0dpa_vs_1dpa	DEG
clcn3	7.61798e-13	0.277122	0.413	0.338	1.85726e-08	Superficial_Epithelial_0dpa_vs_1dpa	DEG
nr1d1	9.77104e-13	-0.322101	0.252	0.331	2.38218e-08	Superficial_Epithelial_0dpa_vs_1dpa	DEG
uvssa	1.11345e-12	0.266352	0.156	0.094	2.7146e-08	Superficial_Epithelial_0dpa_vs_1dpa	DEG
klc1a	1.13166e-12	0.285477	0.329	0.254	2.75899e-08	Superficial_Epithelial_0dpa_vs_1dpa	DEG
cd44a	1.26331e-12	-0.32334	0.697	0.727	3.07996e-08	Superficial_Epithelial_0dpa_vs_1dpa	DEG
cirbpa	1.4908e-12	0.259531	0.537	0.469	3.63457e-08	Superficial_Epithelial_0dpa_vs_1dpa	DEG
tax1bp3	2.40966e-12	0.272161	0.53	0.464	5.87476e-08	Superficial_Epithelial_0dpa_vs_1dpa	DEG
ppfibp2b	2.60049e-12	-0.252914	0.25	0.33	6.33999e-08	Superficial_Epithelial_0dpa_vs_1dpa	DEG
tpst1	3.348e-12	0.325845	0.22	0.155	8.16243e-08	Superficial_Epithelial_0dpa_vs_1dpa	DEG
ccnd2a	3.86247e-12	0.383424	0.233	0.165	9.4167e-08	Superficial_Epithelial_0dpa_vs_1dpa	DEG
kansl1a	4.36657e-12	0.271107	0.249	0.18	1.06457e-07	Superficial_Epithelial_0dpa_vs_1dpa	DEG
AL954191.2	4.69238e-12	-0.365206	0.117	0.178	1.144e-07	Superficial_Epithelial_0dpa_vs_1dpa	DEG
zfand2a	4.92129e-12	0.420816	0.507	0.452	1.19981e-07	Superficial_Epithelial_0dpa_vs_1dpa	DEG
nfic	5.04688e-12	0.367019	0.169	0.109	1.23043e-07	Superficial_Epithelial_0dpa_vs_1dpa	DEG
adck1	6.74093e-12	0.292879	0.259	0.189	1.64344e-07	Superficial_Epithelial_0dpa_vs_1dpa	DEG
zswim5	6.85496e-12	0.296794	0.548	0.493	1.67124e-07	Superficial_Epithelial_0dpa_vs_1dpa	DEG
klf8	6.89576e-12	0.308656	0.596	0.532	1.68119e-07	Superficial_Epithelial_0dpa_vs_1dpa	DEG
immp2l	7.1239e-12	0.325686	0.244	0.173	1.73681e-07	Superficial_Epithelial_0dpa_vs_1dpa	DEG
camk2g1	8.37489e-12	0.258246	0.157	0.098	2.0418e-07	Superficial_Epithelial_0dpa_vs_1dpa	DEG
gsk3bb	8.49404e-12	0.250456	0.148	0.09	2.07085e-07	Superficial_Epithelial_0dpa_vs_1dpa	DEG
numb	8.65934e-12	0.270901	0.361	0.295	2.11115e-07	Superficial_Epithelial_0dpa_vs_1dpa	DEG
zgc:194839	1.06282e-11	-0.271342	0.304	0.389	2.59115e-07	Superficial_Epithelial_0dpa_vs_1dpa	DEG
f2rl1.2	1.18966e-11	0.258982	0.524	0.466	2.90039e-07	Superficial_Epithelial_0dpa_vs_1dpa	DEG
rarab	1.22865e-11	0.290628	0.183	0.12	2.99545e-07	Superficial_Epithelial_0dpa_vs_1dpa	DEG
scrib	1.39014e-11	0.299006	0.269	0.202	3.38916e-07	Superficial_Epithelial_0dpa_vs_1dpa	DEG
foxo1a	1.41881e-11	0.267978	0.753	0.706	3.45905e-07	Superficial_Epithelial_0dpa_vs_1dpa	DEG
zbtb20	1.4885e-11	0.356833	0.394	0.329	3.62897e-07	Superficial_Epithelial_0dpa_vs_1dpa	DEG
exoc6b	1.65432e-11	0.255248	0.347	0.277	4.03323e-07	Superficial_Epithelial_0dpa_vs_1dpa	DEG
tle3b	1.69931e-11	0.302136	0.571	0.518	4.14291e-07	Superficial_Epithelial_0dpa_vs_1dpa	DEG
srgap3	2.31088e-11	0.281698	0.202	0.138	5.63393e-07	Superficial_Epithelial_0dpa_vs_1dpa	DEG
net1	2.38676e-11	-0.273597	0.584	0.647	5.81892e-07	Superficial_Epithelial_0dpa_vs_1dpa	DEG
rorcb	3.30258e-11	0.288487	0.283	0.209	8.0517e-07	Superficial_Epithelial_0dpa_vs_1dpa	DEG
si:dkey-147f3.8	3.88988e-11	0.264331	0.16	0.104	9.48352e-07	Superficial_Epithelial_0dpa_vs_1dpa	DEG
jag1b	8.35727e-11	-0.340926	0.303	0.369	2.0375e-06	Superficial_Epithelial_0dpa_vs_1dpa	DEG
brdt	1.07386e-10	0.298566	0.195	0.137	2.61806e-06	Superficial_Epithelial_0dpa_vs_1dpa	DEG
cldnf	2.24154e-10	-0.261931	0.373	0.441	5.46488e-06	Superficial_Epithelial_0dpa_vs_1dpa	DEG
rbm4.2	5.25478e-10	0.286089	0.271	0.211	1.28112e-05	Superficial_Epithelial_0dpa_vs_1dpa	DEG
ubash3ba	5.57994e-10	0.267905	0.154	0.102	1.36039e-05	Superficial_Epithelial_0dpa_vs_1dpa	DEG
fbxo32	8.22181e-10	0.2539	0.177	0.121	2.00448e-05	Superficial_Epithelial_0dpa_vs_1dpa	DEG
si:ch211-217k17.10	9.60085e-10	-0.336843	0.571	0.613	2.34069e-05	Superficial_Epithelial_0dpa_vs_1dpa	DEG
ank3a	1.19778e-09	0.305896	0.143	0.091	2.9202e-05	Superficial_Epithelial_0dpa_vs_1dpa	DEG
alcama	1.41556e-09	0.305979	0.469	0.411	3.45113e-05	Superficial_Epithelial_0dpa_vs_1dpa	DEG
lgals3bpa	1.57231e-09	-0.428734	0.641	0.646	3.8333e-05	Superficial_Epithelial_0dpa_vs_1dpa	DEG
peli1a	4.85804e-09	0.268693	0.132	0.085	0.000118439	Superficial_Epithelial_0dpa_vs_1dpa	DEG
CU467961.1	9.58442e-09	0.31158	0.685	0.672	0.000233668	Superficial_Epithelial_0dpa_vs_1dpa	DEG
cldni	1.36037e-08	-0.580851	0.215	0.262	0.000331658	Superficial_Epithelial_0dpa_vs_1dpa	DEG
hspa4a	1.61932e-08	0.260909	0.629	0.591	0.00039479	Superficial_Epithelial_0dpa_vs_1dpa	DEG
wwc1	1.67106e-08	0.251513	0.396	0.341	0.000407405	Superficial_Epithelial_0dpa_vs_1dpa	DEG
si:ch1073-440b2.1	5.06225e-08	0.272844	0.572	0.521	0.00123418	Superficial_Epithelial_0dpa_vs_1dpa	DEG
trps1	8.22382e-08	0.264721	0.364	0.309	0.00200497	Superficial_Epithelial_0dpa_vs_1dpa	DEG
ttc39a	8.7233e-08	0.251612	0.331	0.274	0.00212674	Superficial_Epithelial_0dpa_vs_1dpa	DEG
ndst1b	9.22594e-08	0.281947	0.391	0.341	0.00224929	Superficial_Epithelial_0dpa_vs_1dpa	DEG
wu:fb18f06	2.10762e-07	0.294188	0.377	0.329	0.00513838	Superficial_Epithelial_0dpa_vs_1dpa	DEG
hsp70.1	2.39484e-07	0.266911	0.288	0.233	0.00583863	Superficial_Epithelial_0dpa_vs_1dpa	DEG
hsp70.3	2.72676e-07	0.281914	0.602	0.559	0.00664783	Superficial_Epithelial_0dpa_vs_1dpa	DEG
sb:cb1058	0	-1.42226	0.005	0.345	0	Superficial_Epithelial_0dpa_vs_2dpa	DEG
col1a1a	0	-3.14808	0.035	0.478	0	Superficial_Epithelial_0dpa_vs_2dpa	DEG
col7a1	0	-2.22316	0.013	0.409	0	Superficial_Epithelial_0dpa_vs_2dpa	DEG
fn1b	0	-3.88654	0.061	0.755	0	Superficial_Epithelial_0dpa_vs_2dpa	DEG
f5	0	-1.65789	0.004	0.404	0	Superficial_Epithelial_0dpa_vs_2dpa	DEG
sparc	0	-3.39832	0.065	0.715	0	Superficial_Epithelial_0dpa_vs_2dpa	DEG
adam8a	0	-2.39173	0	0.508	0	Superficial_Epithelial_0dpa_vs_2dpa	DEG
cxl34c	0	-1.95104	0.002	0.422	0	Superficial_Epithelial_0dpa_vs_2dpa	DEG
frem2b	0	-1.92952	0.007	0.42	0	Superficial_Epithelial_0dpa_vs_2dpa	DEG
postnb	0	-2.92417	0.041	0.611	0	Superficial_Epithelial_0dpa_vs_2dpa	DEG
krt18a.1	0	-3.0058	0.1	0.814	0	Superficial_Epithelial_0dpa_vs_2dpa	DEG
frem2a	0	-2.19821	0.001	0.368	0	Superficial_Epithelial_0dpa_vs_2dpa	DEG
ecm2	0	-1.96821	0.008	0.392	0	Superficial_Epithelial_0dpa_vs_2dpa	DEG
and1	0	-2.49714	0	0.484	0	Superficial_Epithelial_0dpa_vs_2dpa	DEG
enam	1.68712e-301	-2.01296	0	0.296	4.11319e-297	Superficial_Epithelial_0dpa_vs_2dpa	DEG
abca1a	2.78108e-297	-1.98224	0.092	0.611	6.78028e-293	Superficial_Epithelial_0dpa_vs_2dpa	DEG
alpi.1	6.76584e-294	-1.76919	0.004	0.312	1.64951e-289	Superficial_Epithelial_0dpa_vs_2dpa	DEG
jag1a	4.25957e-292	-1.77667	0.022	0.399	1.03848e-287	Superficial_Epithelial_0dpa_vs_2dpa	DEG
ctsla	3.99759e-286	-2.21093	0.096	0.596	9.74613e-282	Superficial_Epithelial_0dpa_vs_2dpa	DEG
ptprz1a	5.18425e-286	-1.31875	0.01	0.343	1.26392e-281	Superficial_Epithelial_0dpa_vs_2dpa	DEG
etv4	1.5063e-282	-1.0778	0.007	0.326	3.67236e-278	Superficial_Epithelial_0dpa_vs_2dpa	DEG
nppc	4.57498e-272	-1.41076	0.001	0.274	1.11538e-267	Superficial_Epithelial_0dpa_vs_2dpa	DEG
apoeb	7.72608e-261	-3.00663	0.266	0.8	1.88362e-256	Superficial_Epithelial_0dpa_vs_2dpa	DEG
mxra8a	3.61578e-260	-1.18159	0.002	0.269	8.81528e-256	Superficial_Epithelial_0dpa_vs_2dpa	DEG
txn	5.16138e-257	-1.53237	0.064	0.504	1.25834e-252	Superficial_Epithelial_0dpa_vs_2dpa	DEG
mdka	5.16003e-250	-1.50929	0.023	0.366	1.25801e-245	Superficial_Epithelial_0dpa_vs_2dpa	DEG
robo1	1.09114e-244	-1.901	0.102	0.573	2.66021e-240	Superficial_Epithelial_0dpa_vs_2dpa	DEG
frem3	5.15535e-244	-1.44053	0.003	0.262	1.25687e-239	Superficial_Epithelial_0dpa_vs_2dpa	DEG
itga5	9.97349e-244	-1.18536	0.004	0.266	2.43154e-239	Superficial_Epithelial_0dpa_vs_2dpa	DEG
lifrb	2.13442e-237	-1.65608	0.052	0.446	5.20373e-233	Superficial_Epithelial_0dpa_vs_2dpa	DEG
eppk1	7.43843e-237	-2.00232	0.619	0.951	1.81349e-232	Superficial_Epithelial_0dpa_vs_2dpa	DEG
sema5a	1.68348e-232	-1.24488	0.008	0.28	4.10433e-228	Superficial_Epithelial_0dpa_vs_2dpa	DEG
tmsb4x	1.43099e-231	-2.23388	0.33	0.816	3.48875e-227	Superficial_Epithelial_0dpa_vs_2dpa	DEG
rai14	1.76887e-230	-1.17736	0.014	0.305	4.31252e-226	Superficial_Epithelial_0dpa_vs_2dpa	DEG
epha7	9.47035e-229	-1.73934	0.091	0.539	2.30887e-224	Superficial_Epithelial_0dpa_vs_2dpa	DEG
hsp90b1	5.13541e-224	-1.93385	0.133	0.596	1.25201e-219	Superficial_Epithelial_0dpa_vs_2dpa	DEG
chl1a	6.54419e-221	-1.8698	0.251	0.741	1.59547e-216	Superficial_Epithelial_0dpa_vs_2dpa	DEG
lrp1ab	6.69931e-220	-1.82289	0.096	0.532	1.63329e-215	Superficial_Epithelial_0dpa_vs_2dpa	DEG
plxna2	4.16385e-215	-1.05343	0.007	0.257	1.01515e-210	Superficial_Epithelial_0dpa_vs_2dpa	DEG
ccl27a	3.71598e-214	-1.9219	0.212	0.686	9.05955e-210	Superficial_Epithelial_0dpa_vs_2dpa	DEG
abcb5	1.04943e-213	2.17813	0.951	0.757	2.55852e-209	Superficial_Epithelial_0dpa_vs_2dpa	DEG
epha4a	1.21083e-210	-0.978972	0.012	0.277	2.952e-206	Superficial_Epithelial_0dpa_vs_2dpa	DEG
si:ch211-241e1.3	1.37577e-210	-1.97747	0.199	0.689	3.35413e-206	Superficial_Epithelial_0dpa_vs_2dpa	DEG
vcana	2.06931e-210	-1.00976	0.001	0.214	5.04497e-206	Superficial_Epithelial_0dpa_vs_2dpa	DEG
col10a1a	5.30386e-210	-1.28198	0	0.208	1.29308e-205	Superficial_Epithelial_0dpa_vs_2dpa	DEG
RAPH1	1.48084e-208	-1.57476	0.039	0.376	3.61029e-204	Superficial_Epithelial_0dpa_vs_2dpa	DEG
calr3b	2.25557e-205	-1.42509	0.063	0.442	5.49908e-201	Superficial_Epithelial_0dpa_vs_2dpa	DEG
fam171a2a	6.41431e-205	-0.970942	0.005	0.238	1.56381e-200	Superficial_Epithelial_0dpa_vs_2dpa	DEG
lsp1b	7.76138e-205	-1.49479	0.053	0.411	1.89222e-200	Superficial_Epithelial_0dpa_vs_2dpa	DEG
tnnt3b	3.52332e-204	-0.961105	0.012	0.269	8.58985e-200	Superficial_Epithelial_0dpa_vs_2dpa	DEG
zgc:154093	1.08143e-203	-1.03678	0.006	0.241	2.63653e-199	Superficial_Epithelial_0dpa_vs_2dpa	DEG
tspan9a	9.03854e-203	-1.36296	0.038	0.368	2.2036e-198	Superficial_Epithelial_0dpa_vs_2dpa	DEG
actn4	7.93357e-202	1.13957	0.995	0.976	1.9342e-197	Superficial_Epithelial_0dpa_vs_2dpa	DEG
FO834828.1	2.60359e-201	2.72894	0.731	0.089	6.34755e-197	Superficial_Epithelial_0dpa_vs_2dpa	DEG
ggt1a	1.03932e-199	-0.944109	0	0.201	2.53386e-195	Superficial_Epithelial_0dpa_vs_2dpa	DEG
vwa1	9.66503e-197	-1.34668	0.035	0.35	2.35633e-192	Superficial_Epithelial_0dpa_vs_2dpa	DEG
btbd11b	3.99187e-195	-1.19656	0.009	0.249	9.73218e-191	Superficial_Epithelial_0dpa_vs_2dpa	DEG
dhrs13a.2	6.99931e-194	1.35408	0.996	0.892	1.70643e-189	Superficial_Epithelial_0dpa_vs_2dpa	DEG
ogna	2.91185e-192	-0.87426	0.001	0.197	7.09909e-188	Superficial_Epithelial_0dpa_vs_2dpa	DEG
krt94	5.24503e-191	-1.93363	0.458	0.938	1.27874e-186	Superficial_Epithelial_0dpa_vs_2dpa	DEG
plxnb1a	1.69378e-190	-0.686038	0.004	0.219	4.12944e-186	Superficial_Epithelial_0dpa_vs_2dpa	DEG
krt93	4.65462e-190	-1.80324	0.342	0.838	1.1348e-185	Superficial_Epithelial_0dpa_vs_2dpa	DEG
ezrb	1.03029e-188	1.16016	0.995	0.954	2.51185e-184	Superficial_Epithelial_0dpa_vs_2dpa	DEG
bcam	1.22047e-186	-1.4997	0.016	0.27	2.9755e-182	Superficial_Epithelial_0dpa_vs_2dpa	DEG
fat2	1.30189e-181	-1.8204	0.105	0.491	3.174e-177	Superficial_Epithelial_0dpa_vs_2dpa	DEG
clu	8.22853e-180	-0.921251	0.003	0.199	2.00612e-175	Superficial_Epithelial_0dpa_vs_2dpa	DEG
fhod3b	5.56569e-178	-1.19656	0.012	0.245	1.35692e-173	Superficial_Epithelial_0dpa_vs_2dpa	DEG
metrnla	7.89593e-177	-0.879767	0.013	0.247	1.92503e-172	Superficial_Epithelial_0dpa_vs_2dpa	DEG
serpinh1b	4.80393e-176	-1.08059	0.002	0.189	1.1712e-171	Superficial_Epithelial_0dpa_vs_2dpa	DEG
atf3	2.30698e-175	2.15273	0.801	0.296	5.62441e-171	Superficial_Epithelial_0dpa_vs_2dpa	DEG
hspa5	2.43658e-174	-1.87112	0.463	0.843	5.94038e-170	Superficial_Epithelial_0dpa_vs_2dpa	DEG
cd81a	1.70176e-172	-0.92874	0.009	0.226	4.14889e-168	Superficial_Epithelial_0dpa_vs_2dpa	DEG
notch3	2.03199e-172	-1.62647	0.075	0.423	4.954e-168	Superficial_Epithelial_0dpa_vs_2dpa	DEG
tfpia	2.09038e-172	-1.54209	0.069	0.411	5.09635e-168	Superficial_Epithelial_0dpa_vs_2dpa	DEG
cygb1	3.66897e-171	-0.933024	0.004	0.195	8.94496e-167	Superficial_Epithelial_0dpa_vs_2dpa	DEG
fstl1b	1.7004e-170	-1.00052	0.005	0.204	4.14559e-166	Superficial_Epithelial_0dpa_vs_2dpa	DEG
lsp1a	7.98202e-170	-1.18627	0.026	0.293	1.94602e-165	Superficial_Epithelial_0dpa_vs_2dpa	DEG
col1a2	8.39484e-170	-2.13769	0.045	0.35	2.04666e-165	Superficial_Epithelial_0dpa_vs_2dpa	DEG
si:dkey-223p19.1	8.8645e-168	2.07775	0.737	0.208	2.16116e-163	Superficial_Epithelial_0dpa_vs_2dpa	DEG
zfhx3	1.13394e-167	-1.49483	0.171	0.592	2.76455e-163	Superficial_Epithelial_0dpa_vs_2dpa	DEG
igsf3	2.68375e-167	-0.86075	0.005	0.201	6.54297e-163	Superficial_Epithelial_0dpa_vs_2dpa	DEG
marcksl1a	1.0571e-166	-0.886761	0.015	0.249	2.5772e-162	Superficial_Epithelial_0dpa_vs_2dpa	DEG
mmp14b	2.72081e-163	-0.936874	0.019	0.261	6.63334e-159	Superficial_Epithelial_0dpa_vs_2dpa	DEG
tmem176l.1	2.79478e-163	-0.79874	0.014	0.241	6.81367e-159	Superficial_Epithelial_0dpa_vs_2dpa	DEG
ppap2d	1.03481e-161	-1.33693	0.023	0.27	2.52286e-157	Superficial_Epithelial_0dpa_vs_2dpa	DEG
cxcl14	1.2592e-160	-1.02248	0.016	0.246	3.06993e-156	Superficial_Epithelial_0dpa_vs_2dpa	DEG
calr	2.41063e-160	-0.957365	0.032	0.305	5.87713e-156	Superficial_Epithelial_0dpa_vs_2dpa	DEG
si:dkey-239b22.1	7.83402e-157	1.46534	0.946	0.65	1.90994e-152	Superficial_Epithelial_0dpa_vs_2dpa	DEG
nectin1b	3.95986e-156	-1.91895	0.152	0.542	9.65414e-152	Superficial_Epithelial_0dpa_vs_2dpa	DEG
ptprub	1.73428e-154	-1.68389	0.109	0.472	4.22818e-150	Superficial_Epithelial_0dpa_vs_2dpa	DEG
hsd17b12a	1.85877e-154	1.05324	0.994	0.916	4.53169e-150	Superficial_Epithelial_0dpa_vs_2dpa	DEG
col1a1b	2.47578e-154	-2.22872	0.052	0.35	6.03594e-150	Superficial_Epithelial_0dpa_vs_2dpa	DEG
fosl1a	1.79482e-153	1.30429	0.941	0.719	4.37578e-149	Superficial_Epithelial_0dpa_vs_2dpa	DEG
tp63	1.77446e-152	-2.23835	0.153	0.524	4.32614e-148	Superficial_Epithelial_0dpa_vs_2dpa	DEG
fstl1a	2.76342e-151	-0.89656	0.002	0.168	6.73722e-147	Superficial_Epithelial_0dpa_vs_2dpa	DEG
gstm.3	1.11341e-150	-0.75338	0.018	0.242	2.71449e-146	Superficial_Epithelial_0dpa_vs_2dpa	DEG
alcamb	4.01074e-150	-0.915389	0.025	0.268	9.77819e-146	Superficial_Epithelial_0dpa_vs_2dpa	DEG
tmem176l.4	4.40093e-149	-1.32234	0.652	0.928	1.07295e-144	Superficial_Epithelial_0dpa_vs_2dpa	DEG
mt-cyb	1.72562e-147	-0.646518	0.999	0.999	4.20706e-143	Superficial_Epithelial_0dpa_vs_2dpa	DEG
enpp1	7.72678e-147	-0.624996	0.004	0.174	1.88379e-142	Superficial_Epithelial_0dpa_vs_2dpa	DEG
hyou1	1.7619e-145	-1.33252	0.104	0.454	4.29551e-141	Superficial_Epithelial_0dpa_vs_2dpa	DEG
calr3a	2.73873e-145	-1.42022	0.182	0.576	6.67702e-141	Superficial_Epithelial_0dpa_vs_2dpa	DEG
zgc:173729	3.77309e-144	-1.18258	0.071	0.385	9.19879e-140	Superficial_Epithelial_0dpa_vs_2dpa	DEG
sema6dl	3.92687e-143	-1.12061	0.047	0.326	9.5737e-139	Superficial_Epithelial_0dpa_vs_2dpa	DEG
cldna	5.82307e-143	-2.35102	0.29	0.662	1.41966e-138	Superficial_Epithelial_0dpa_vs_2dpa	DEG
mt-atp6	1.98805e-142	-0.798985	0.998	0.996	4.84687e-138	Superficial_Epithelial_0dpa_vs_2dpa	DEG
etnk1	4.18411e-141	1.32266	0.938	0.742	1.02009e-136	Superficial_Epithelial_0dpa_vs_2dpa	DEG
TCF4	5.84516e-141	1.42552	0.875	0.573	1.42505e-136	Superficial_Epithelial_0dpa_vs_2dpa	DEG
myofl	8.75129e-141	-0.855646	0.03	0.273	2.13356e-136	Superficial_Epithelial_0dpa_vs_2dpa	DEG
bcl2l10	4.53349e-140	-1.01582	0.034	0.284	1.10527e-135	Superficial_Epithelial_0dpa_vs_2dpa	DEG
arhgef1a	9.33128e-140	-0.602194	0.008	0.185	2.27497e-135	Superficial_Epithelial_0dpa_vs_2dpa	DEG
unc5b	2.58064e-139	-0.798498	0.008	0.188	6.29161e-135	Superficial_Epithelial_0dpa_vs_2dpa	DEG
cast	3.08837e-139	0.784537	0.998	0.985	7.52944e-135	Superficial_Epithelial_0dpa_vs_2dpa	DEG
CABZ01048956.1	7.10339e-139	1.55494	0.882	0.534	1.73181e-134	Superficial_Epithelial_0dpa_vs_2dpa	DEG
si:ch211-69b7.6	4.40049e-137	1.16883	0.997	0.962	1.07284e-132	Superficial_Epithelial_0dpa_vs_2dpa	DEG
ppib	6.33564e-137	-1.37711	0.202	0.585	1.54463e-132	Superficial_Epithelial_0dpa_vs_2dpa	DEG
pdia3	4.14034e-136	-1.30735	0.236	0.626	1.00942e-131	Superficial_Epithelial_0dpa_vs_2dpa	DEG
tnks1bp1	1.38671e-135	1.06723	0.973	0.859	3.3808e-131	Superficial_Epithelial_0dpa_vs_2dpa	DEG
mmp2	2.36542e-135	-0.858583	0.011	0.197	5.7669e-131	Superficial_Epithelial_0dpa_vs_2dpa	DEG
oat	1.11533e-134	1.85848	0.588	0.081	2.71916e-130	Superficial_Epithelial_0dpa_vs_2dpa	DEG
cacna1ia	7.99319e-134	-1.20017	0.042	0.301	1.94874e-129	Superficial_Epithelial_0dpa_vs_2dpa	DEG
lmo7a	1.1265e-133	0.770763	0.999	0.978	2.7464e-129	Superficial_Epithelial_0dpa_vs_2dpa	DEG
zbtb16a	4.00144e-133	1.91538	0.652	0.159	9.75552e-129	Superficial_Epithelial_0dpa_vs_2dpa	DEG
zgc:56095	3.75984e-132	-0.566675	0.005	0.164	9.16649e-128	Superficial_Epithelial_0dpa_vs_2dpa	DEG
si:ch211-105c13.3	2.24666e-131	-1.25198	0.096	0.419	5.47735e-127	Superficial_Epithelial_0dpa_vs_2dpa	DEG
col14a1a	6.8543e-131	-1.48164	0.017	0.216	1.67108e-126	Superficial_Epithelial_0dpa_vs_2dpa	DEG
thy1	2.24204e-130	-1.66091	0.206	0.565	5.4661e-126	Superficial_Epithelial_0dpa_vs_2dpa	DEG
htra1b	4.50346e-130	-0.969085	0.019	0.223	1.09794e-125	Superficial_Epithelial_0dpa_vs_2dpa	DEG
sox4a	8.18834e-130	-0.664318	0.011	0.192	1.99632e-125	Superficial_Epithelial_0dpa_vs_2dpa	DEG
vmp1	9.45714e-130	-1.42707	0.159	0.515	2.30565e-125	Superficial_Epithelial_0dpa_vs_2dpa	DEG
anxa1c	1.95168e-129	-1.28693	0.497	0.835	4.75819e-125	Superficial_Epithelial_0dpa_vs_2dpa	DEG
angptl4	3.00607e-129	-1.19081	0.093	0.409	7.3288e-125	Superficial_Epithelial_0dpa_vs_2dpa	DEG
hspg2	2.01976e-128	-1.06232	0.012	0.193	4.92416e-124	Superficial_Epithelial_0dpa_vs_2dpa	DEG
FRMD1	2.23989e-128	-1.01941	0.052	0.319	5.46085e-124	Superficial_Epithelial_0dpa_vs_2dpa	DEG
sall1a	4.15073e-128	-0.653793	0.009	0.181	1.01195e-123	Superficial_Epithelial_0dpa_vs_2dpa	DEG
macrod2	6.16195e-128	1.42506	0.933	0.745	1.50228e-123	Superficial_Epithelial_0dpa_vs_2dpa	DEG
arhgef10lb	1.44007e-127	-1.28463	0.091	0.404	3.51089e-123	Superficial_Epithelial_0dpa_vs_2dpa	DEG
rpz5	2.09555e-127	-0.986545	0.05	0.314	5.10895e-123	Superficial_Epithelial_0dpa_vs_2dpa	DEG
papss2a	4.60326e-127	2.00989	0.708	0.301	1.12227e-122	Superficial_Epithelial_0dpa_vs_2dpa	DEG
anxa11a	3.35628e-126	1.49982	0.945	0.819	8.18261e-122	Superficial_Epithelial_0dpa_vs_2dpa	DEG
zgc:193505	4.56282e-126	0.836778	0.999	0.966	1.11242e-121	Superficial_Epithelial_0dpa_vs_2dpa	DEG
si:dkey-102c8.3	2.02809e-125	-0.935162	0.039	0.281	4.94448e-121	Superficial_Epithelial_0dpa_vs_2dpa	DEG
pdia6	4.47078e-125	-1.23534	0.111	0.432	1.08998e-120	Superficial_Epithelial_0dpa_vs_2dpa	DEG
sema6bb	7.63165e-125	-0.651702	0.008	0.173	1.8606e-120	Superficial_Epithelial_0dpa_vs_2dpa	DEG
LO018188.1	1.84393e-124	-0.607899	0.008	0.17	4.4955e-120	Superficial_Epithelial_0dpa_vs_2dpa	DEG
ier2b	2.51558e-124	1.00607	0.966	0.795	6.13298e-120	Superficial_Epithelial_0dpa_vs_2dpa	DEG
igf1ra	1.65973e-122	-1.36596	0.102	0.412	4.04643e-118	Superficial_Epithelial_0dpa_vs_2dpa	DEG
mcl1a	4.34098e-122	0.847085	0.987	0.919	1.05833e-117	Superficial_Epithelial_0dpa_vs_2dpa	DEG
zgc:195173	7.34023e-122	-0.807635	0.036	0.27	1.78955e-117	Superficial_Epithelial_0dpa_vs_2dpa	DEG
srgap1a	1.52153e-120	-0.631494	0.005	0.154	3.70948e-116	Superficial_Epithelial_0dpa_vs_2dpa	DEG
sp6	2.23636e-120	-0.658761	0.015	0.197	5.45226e-116	Superficial_Epithelial_0dpa_vs_2dpa	DEG
lzts1	2.94798e-120	-1.00125	0.039	0.273	7.18716e-116	Superficial_Epithelial_0dpa_vs_2dpa	DEG
ror2	8.58315e-119	-0.717144	0.004	0.143	2.09257e-114	Superficial_Epithelial_0dpa_vs_2dpa	DEG
sema4ab	4.52415e-116	-0.922816	0.038	0.266	1.10299e-111	Superficial_Epithelial_0dpa_vs_2dpa	DEG
si:dkey-248g15.3	1.22163e-115	-0.913399	0.995	1	2.97833e-111	Superficial_Epithelial_0dpa_vs_2dpa	DEG
sec23b	1.47658e-115	1.05745	0.942	0.747	3.59989e-111	Superficial_Epithelial_0dpa_vs_2dpa	DEG
sema4ba	7.04321e-115	-1.08126	0.067	0.336	1.71714e-110	Superficial_Epithelial_0dpa_vs_2dpa	DEG
prss35	2.35368e-114	-0.668385	0.001	0.119	5.73828e-110	Superficial_Epithelial_0dpa_vs_2dpa	DEG
cyldb	9.75133e-114	1.32637	0.662	0.197	2.37737e-109	Superficial_Epithelial_0dpa_vs_2dpa	DEG
pcdh7b	1.45916e-113	-0.786601	0.019	0.207	3.55744e-109	Superficial_Epithelial_0dpa_vs_2dpa	DEG
vgll4l	1.91971e-113	-1.08231	0.07	0.341	4.68026e-109	Superficial_Epithelial_0dpa_vs_2dpa	DEG
hrh3	9.86194e-113	-0.42194	0.001	0.119	2.40434e-108	Superficial_Epithelial_0dpa_vs_2dpa	DEG
sqstm1	1.4036e-112	1.05952	0.928	0.722	3.42198e-108	Superficial_Epithelial_0dpa_vs_2dpa	DEG
chac1	2.15272e-112	0.932072	0.969	0.807	5.24832e-108	Superficial_Epithelial_0dpa_vs_2dpa	DEG
sult2st3	1.96193e-111	3.20711	0.658	0.255	4.7832e-107	Superficial_Epithelial_0dpa_vs_2dpa	DEG
zgc:153911	9.1799e-111	1.01032	0.969	0.842	2.23806e-106	Superficial_Epithelial_0dpa_vs_2dpa	DEG
fkbp9	1.11616e-110	-0.502745	0.002	0.126	2.7212e-106	Superficial_Epithelial_0dpa_vs_2dpa	DEG
myh9a	1.18599e-110	-1.12774	0.078	0.35	2.89145e-106	Superficial_Epithelial_0dpa_vs_2dpa	DEG
fras1	1.37212e-110	-1.25966	0.022	0.211	3.34522e-106	Superficial_Epithelial_0dpa_vs_2dpa	DEG
si:ch211-232i5.1	1.62726e-110	1.01815	0.907	0.604	3.96726e-106	Superficial_Epithelial_0dpa_vs_2dpa	DEG
dennd2b	6.21833e-110	-0.897744	0.056	0.305	1.51603e-105	Superficial_Epithelial_0dpa_vs_2dpa	DEG
gpc1b	6.80617e-110	-0.774556	0.019	0.203	1.65935e-105	Superficial_Epithelial_0dpa_vs_2dpa	DEG
snx11	8.96899e-110	-0.809851	0.04	0.264	2.18664e-105	Superficial_Epithelial_0dpa_vs_2dpa	DEG
ctsk	4.45943e-109	-1.11103	0.176	0.519	1.08721e-104	Superficial_Epithelial_0dpa_vs_2dpa	DEG
plekhg5b	7.5388e-109	-0.995243	0.059	0.311	1.83796e-104	Superficial_Epithelial_0dpa_vs_2dpa	DEG
gsna	4.44429e-108	-0.579187	0.016	0.188	1.08352e-103	Superficial_Epithelial_0dpa_vs_2dpa	DEG
pdzd2	6.10807e-108	-0.736696	0.016	0.185	1.48915e-103	Superficial_Epithelial_0dpa_vs_2dpa	DEG
ndrg1a	7.27539e-108	-0.543594	0.002	0.122	1.77374e-103	Superficial_Epithelial_0dpa_vs_2dpa	DEG
itgb3b	7.67819e-108	-0.550151	0.011	0.169	1.87194e-103	Superficial_Epithelial_0dpa_vs_2dpa	DEG
gnai2a	2.52442e-107	-1.17793	0.416	0.746	6.15453e-103	Superficial_Epithelial_0dpa_vs_2dpa	DEG
her9	1.37021e-106	-1.34639	0.346	0.688	3.34057e-102	Superficial_Epithelial_0dpa_vs_2dpa	DEG
f3a	1.72713e-106	-0.97453	0.065	0.322	4.21075e-102	Superficial_Epithelial_0dpa_vs_2dpa	DEG
grhl2a	5.65662e-106	-1.17553	0.074	0.334	1.37908e-101	Superficial_Epithelial_0dpa_vs_2dpa	DEG
hmox1a	1.57914e-105	-0.85107	0.013	0.173	3.84994e-101	Superficial_Epithelial_0dpa_vs_2dpa	DEG
nupr1b	2.81705e-105	-0.463936	0.004	0.128	6.86796e-101	Superficial_Epithelial_0dpa_vs_2dpa	DEG
FO834828.2	1.21469e-104	1.09084	0.875	0.582	2.9614e-100	Superficial_Epithelial_0dpa_vs_2dpa	DEG
card14	1.30537e-104	1.17274	0.831	0.522	3.18249e-100	Superficial_Epithelial_0dpa_vs_2dpa	DEG
entpd8	1.7371e-104	2.22619	0.54	0.115	4.23505e-100	Superficial_Epithelial_0dpa_vs_2dpa	DEG
elovl1b	1.0435e-103	-1.17505	0.172	0.503	2.54406e-99	Superficial_Epithelial_0dpa_vs_2dpa	DEG
timp2a	1.21335e-103	-1.26695	0.238	0.562	2.95814e-99	Superficial_Epithelial_0dpa_vs_2dpa	DEG
col12a1b	2.78033e-103	-0.96523	0.014	0.176	6.77845e-99	Superficial_Epithelial_0dpa_vs_2dpa	DEG
thsd7ba	5.09887e-103	-1.15464	0.006	0.138	1.2431e-98	Superficial_Epithelial_0dpa_vs_2dpa	DEG
si:ch211-107n13.1	1.46913e-102	-0.49942	0.007	0.142	3.58174e-98	Superficial_Epithelial_0dpa_vs_2dpa	DEG
pdia4	3.14556e-102	-0.908718	0.075	0.338	7.66888e-98	Superficial_Epithelial_0dpa_vs_2dpa	DEG
si:dkey-262k9.2	4.54638e-102	-1.93539	0.481	0.724	1.10841e-97	Superficial_Epithelial_0dpa_vs_2dpa	DEG
dcn	4.58202e-102	-0.636329	0.005	0.134	1.1171e-97	Superficial_Epithelial_0dpa_vs_2dpa	DEG
lrrc17	2.84485e-101	-0.980483	0.064	0.308	6.93574e-97	Superficial_Epithelial_0dpa_vs_2dpa	DEG
si:busm1-57f23.1	3.53658e-101	-1.17892	0.523	0.8	8.62218e-97	Superficial_Epithelial_0dpa_vs_2dpa	DEG
mmp13b	2.04214e-100	-0.502799	0	0.1	4.97875e-96	Superficial_Epithelial_0dpa_vs_2dpa	DEG
reck	8.97102e-100	-0.800124	0.063	0.309	2.18714e-95	Superficial_Epithelial_0dpa_vs_2dpa	DEG
dkk3b	1.16545e-99	-0.540178	0.007	0.141	2.84136e-95	Superficial_Epithelial_0dpa_vs_2dpa	DEG
tuft1a	1.19271e-99	1.47317	0.721	0.359	2.90783e-95	Superficial_Epithelial_0dpa_vs_2dpa	DEG
CR926130.2	1.66661e-99	-1.09341	0.378	0.801	4.06318e-95	Superficial_Epithelial_0dpa_vs_2dpa	DEG
usp54a	5.53172e-99	1.2237	0.81	0.503	1.34863e-94	Superficial_Epithelial_0dpa_vs_2dpa	DEG
evpla	6.70918e-99	0.629618	0.999	0.989	1.6357e-94	Superficial_Epithelial_0dpa_vs_2dpa	DEG
actn1	3.04175e-98	-0.661209	0.022	0.197	7.4158e-94	Superficial_Epithelial_0dpa_vs_2dpa	DEG
tnc	3.82802e-98	-0.484908	0.001	0.103	9.33272e-94	Superficial_Epithelial_0dpa_vs_2dpa	DEG
wnt5b	4.67614e-98	-0.589255	0.007	0.141	1.14004e-93	Superficial_Epithelial_0dpa_vs_2dpa	DEG
sik1	7.23086e-98	1.33236	0.79	0.426	1.76288e-93	Superficial_Epithelial_0dpa_vs_2dpa	DEG
mmp14a	8.71643e-98	-0.552907	0.006	0.134	2.12507e-93	Superficial_Epithelial_0dpa_vs_2dpa	DEG
pdzrn3a	2.39515e-97	-0.546535	0.009	0.147	5.83937e-93	Superficial_Epithelial_0dpa_vs_2dpa	DEG
arg2	4.00526e-97	1.2825	0.673	0.254	9.76483e-93	Superficial_Epithelial_0dpa_vs_2dpa	DEG
tnfrsf19	1.03878e-96	-0.458307	0.01	0.153	2.53255e-92	Superficial_Epithelial_0dpa_vs_2dpa	DEG
ugt5f1	1.86236e-96	1.02219	0.937	0.638	4.54042e-92	Superficial_Epithelial_0dpa_vs_2dpa	DEG
rhpn2	3.371e-96	0.714821	0.987	0.911	8.21851e-92	Superficial_Epithelial_0dpa_vs_2dpa	DEG
ampd3b	6.71091e-96	1.4153	0.812	0.546	1.63612e-91	Superficial_Epithelial_0dpa_vs_2dpa	DEG
tmprss13b	8.05261e-96	1.1133	0.831	0.576	1.96323e-91	Superficial_Epithelial_0dpa_vs_2dpa	DEG
kcnma1a	1.09119e-95	-0.722613	0.006	0.134	2.66032e-91	Superficial_Epithelial_0dpa_vs_2dpa	DEG
slc26a2	3.98425e-95	2.03589	0.524	0.124	9.71359e-91	Superficial_Epithelial_0dpa_vs_2dpa	DEG
egfl6	4.77691e-95	-0.488644	0.006	0.131	1.16461e-90	Superficial_Epithelial_0dpa_vs_2dpa	DEG
lama5	6.96116e-95	-1.09446	0.036	0.232	1.69713e-90	Superficial_Epithelial_0dpa_vs_2dpa	DEG
si:dkey-193c22.2	1.18398e-94	-0.341907	0.002	0.105	2.88655e-90	Superficial_Epithelial_0dpa_vs_2dpa	DEG
gprc5c	1.49355e-94	-0.758373	0.044	0.254	3.64128e-90	Superficial_Epithelial_0dpa_vs_2dpa	DEG
cart3	2.1654e-94	-0.496742	0.002	0.109	5.27925e-90	Superficial_Epithelial_0dpa_vs_2dpa	DEG
klf3	2.85081e-94	1.38175	0.691	0.316	6.95028e-90	Superficial_Epithelial_0dpa_vs_2dpa	DEG
s100a10b	2.19412e-93	-0.825392	0.866	0.941	5.34925e-89	Superficial_Epithelial_0dpa_vs_2dpa	DEG
bcl2l11	4.05301e-93	-1.14577	0.289	0.622	9.88125e-89	Superficial_Epithelial_0dpa_vs_2dpa	DEG
si:ch211-250c4.4	5.29371e-93	-0.425895	0.003	0.111	1.29061e-88	Superficial_Epithelial_0dpa_vs_2dpa	DEG
FO681323.1	1.82864e-92	0.796191	0.989	0.927	4.45822e-88	Superficial_Epithelial_0dpa_vs_2dpa	DEG
palld	1.89875e-92	-0.660389	0.026	0.201	4.62914e-88	Superficial_Epithelial_0dpa_vs_2dpa	DEG
prickle1a	3.06391e-92	-0.590214	0.021	0.185	7.46981e-88	Superficial_Epithelial_0dpa_vs_2dpa	DEG
gstp1	3.17249e-92	-0.87782	0.087	0.345	7.73452e-88	Superficial_Epithelial_0dpa_vs_2dpa	DEG
lgmn	3.29305e-92	-0.984256	0.173	0.486	8.02846e-88	Superficial_Epithelial_0dpa_vs_2dpa	DEG
dnajb1b	2.1464e-91	1.06118	0.896	0.686	5.23291e-87	Superficial_Epithelial_0dpa_vs_2dpa	DEG
tmsb1	2.56164e-90	-1.05497	0.659	0.847	6.24529e-86	Superficial_Epithelial_0dpa_vs_2dpa	DEG
si:dkey-7c18.24	3.98904e-90	0.759455	0.985	0.834	9.72528e-86	Superficial_Epithelial_0dpa_vs_2dpa	DEG
tmem132e	4.62823e-90	-0.593903	0.017	0.169	1.12836e-85	Superficial_Epithelial_0dpa_vs_2dpa	DEG
tanc1b	5.35787e-90	-1.33795	0.122	0.391	1.30625e-85	Superficial_Epithelial_0dpa_vs_2dpa	DEG
inka1a	4.08424e-89	-0.486185	0.011	0.149	9.95738e-85	Superficial_Epithelial_0dpa_vs_2dpa	DEG
selenop	6.38963e-89	-0.591721	0.015	0.164	1.55779e-84	Superficial_Epithelial_0dpa_vs_2dpa	DEG
daam1b	7.06015e-89	-1.06972	0.254	0.584	1.72126e-84	Superficial_Epithelial_0dpa_vs_2dpa	DEG
FQ311924.2	9.91858e-89	-0.515319	0.014	0.158	2.41815e-84	Superficial_Epithelial_0dpa_vs_2dpa	DEG
abca1b	1.19734e-88	-0.718123	0.032	0.215	2.91911e-84	Superficial_Epithelial_0dpa_vs_2dpa	DEG
sh3rf1	1.04471e-87	-0.71061	0.034	0.219	2.54699e-83	Superficial_Epithelial_0dpa_vs_2dpa	DEG
col5a1	2.28374e-87	-1.06204	0.033	0.215	5.56775e-83	Superficial_Epithelial_0dpa_vs_2dpa	DEG
nt5e	3.12555e-87	2.15064	0.402	0.023	7.62009e-83	Superficial_Epithelial_0dpa_vs_2dpa	DEG
adka	6.84898e-87	-0.9863	0.091	0.341	1.66978e-82	Superficial_Epithelial_0dpa_vs_2dpa	DEG
dusp5	1.67821e-86	0.933661	0.922	0.8	4.09148e-82	Superficial_Epithelial_0dpa_vs_2dpa	DEG
tshz2	2.05316e-86	-0.77759	0.025	0.192	5.00559e-82	Superficial_Epithelial_0dpa_vs_2dpa	DEG
irs1	2.30999e-86	-0.494938	0.012	0.146	5.63176e-82	Superficial_Epithelial_0dpa_vs_2dpa	DEG
rflna	3.04674e-86	-0.865684	0.103	0.369	7.42795e-82	Superficial_Epithelial_0dpa_vs_2dpa	DEG
nucb2a	9.63098e-86	-0.36248	0.006	0.122	2.34803e-81	Superficial_Epithelial_0dpa_vs_2dpa	DEG
tmem154	1.02716e-85	-0.807026	0.056	0.269	2.50422e-81	Superficial_Epithelial_0dpa_vs_2dpa	DEG
zbtb16b	1.37042e-85	1.32243	0.657	0.295	3.34109e-81	Superficial_Epithelial_0dpa_vs_2dpa	DEG
rgs12a	2.15743e-85	-0.562659	0.02	0.176	5.25981e-81	Superficial_Epithelial_0dpa_vs_2dpa	DEG
MDFI	5.71481e-85	-0.531849	0.014	0.154	1.39327e-80	Superficial_Epithelial_0dpa_vs_2dpa	DEG
wu:fj29h11	8.75105e-85	1.22923	0.644	0.274	2.13351e-80	Superficial_Epithelial_0dpa_vs_2dpa	DEG
homer3b	1.1248e-84	-0.691433	0.038	0.224	2.74226e-80	Superficial_Epithelial_0dpa_vs_2dpa	DEG
tspan7	1.1775e-84	-0.349837	0.004	0.111	2.87074e-80	Superficial_Epithelial_0dpa_vs_2dpa	DEG
alas1	1.36268e-84	1.05636	0.795	0.507	3.32221e-80	Superficial_Epithelial_0dpa_vs_2dpa	DEG
ssh2a	4.13842e-84	0.936819	0.876	0.68	1.00895e-79	Superficial_Epithelial_0dpa_vs_2dpa	DEG
xpr1b	4.24538e-84	-0.747497	0.065	0.289	1.03502e-79	Superficial_Epithelial_0dpa_vs_2dpa	DEG
cyp26a1	1.48627e-83	-0.493656	0.005	0.112	3.62352e-79	Superficial_Epithelial_0dpa_vs_2dpa	DEG
lhfpl6	4.67128e-83	-0.463737	0.006	0.116	1.13886e-78	Superficial_Epithelial_0dpa_vs_2dpa	DEG
lgals3bpa	6.63256e-83	1.18832	0.641	0.266	1.61702e-78	Superficial_Epithelial_0dpa_vs_2dpa	DEG
smtnb	1.6141e-82	-0.55321	0.017	0.161	3.93518e-78	Superficial_Epithelial_0dpa_vs_2dpa	DEG
ubb	2.26106e-82	0.633546	0.991	0.974	5.51246e-78	Superficial_Epithelial_0dpa_vs_2dpa	DEG
fndc3ba	3.65369e-82	-0.565828	0.009	0.128	8.90769e-78	Superficial_Epithelial_0dpa_vs_2dpa	DEG
lima1a	4.38521e-82	-0.78345	0.088	0.341	1.06911e-77	Superficial_Epithelial_0dpa_vs_2dpa	DEG
reps2	5.87788e-82	-0.351238	0.004	0.109	1.43303e-77	Superficial_Epithelial_0dpa_vs_2dpa	DEG
ptbp1b	1.37748e-81	-0.927623	0.139	0.414	3.3583e-77	Superficial_Epithelial_0dpa_vs_2dpa	DEG
mical3a.1	1.6189e-81	-0.675006	0.039	0.226	3.94687e-77	Superficial_Epithelial_0dpa_vs_2dpa	DEG
tnfsf10l	1.63999e-81	-1.1044	0.159	0.436	3.9983e-77	Superficial_Epithelial_0dpa_vs_2dpa	DEG
calua	2.04157e-81	-0.30758	0.004	0.104	4.97736e-77	Superficial_Epithelial_0dpa_vs_2dpa	DEG
pnp5a	4.06722e-81	1.04238	0.861	0.601	9.91588e-77	Superficial_Epithelial_0dpa_vs_2dpa	DEG
fn1a	5.25138e-81	-0.511364	0.005	0.109	1.28029e-76	Superficial_Epithelial_0dpa_vs_2dpa	DEG
myo1cb	2.96857e-80	-1.10151	0.4	0.691	7.23738e-76	Superficial_Epithelial_0dpa_vs_2dpa	DEG
actb1	4.42622e-80	0.765858	0.977	0.958	1.07911e-75	Superficial_Epithelial_0dpa_vs_2dpa	DEG
CABZ01058650.1	5.4107e-80	-0.350029	0.003	0.1	1.31913e-75	Superficial_Epithelial_0dpa_vs_2dpa	DEG
btbd11a	6.02659e-80	-0.961676	0.07	0.291	1.46928e-75	Superficial_Epithelial_0dpa_vs_2dpa	DEG
SGMS1	6.22379e-80	-0.951871	0.307	0.634	1.51736e-75	Superficial_Epithelial_0dpa_vs_2dpa	DEG
gdpd5b	7.35595e-79	-0.745456	0.044	0.232	1.79338e-74	Superficial_Epithelial_0dpa_vs_2dpa	DEG
ehbp1l1b	1.18452e-78	-0.484844	0.015	0.149	2.88785e-74	Superficial_Epithelial_0dpa_vs_2dpa	DEG
scinla	1.31285e-78	-0.661559	0.029	0.193	3.20072e-74	Superficial_Epithelial_0dpa_vs_2dpa	DEG
specc1	2.04389e-78	0.793252	0.963	0.842	4.983e-74	Superficial_Epithelial_0dpa_vs_2dpa	DEG
rcn3	3.03122e-78	-0.450971	0.006	0.112	7.39011e-74	Superficial_Epithelial_0dpa_vs_2dpa	DEG
plekhg2	3.30496e-78	-0.749394	0.066	0.285	8.05749e-74	Superficial_Epithelial_0dpa_vs_2dpa	DEG
tgm5l	5.21666e-78	0.801817	0.933	0.768	1.27182e-73	Superficial_Epithelial_0dpa_vs_2dpa	DEG
BX571715.1	1.71555e-77	-0.465216	0.016	0.153	4.18251e-73	Superficial_Epithelial_0dpa_vs_2dpa	DEG
CR388047.3	3.02645e-77	0.658718	0.983	0.87	7.37848e-73	Superficial_Epithelial_0dpa_vs_2dpa	DEG
tanc2a	4.85335e-77	-0.894651	0.094	0.33	1.18325e-72	Superficial_Epithelial_0dpa_vs_2dpa	DEG
fhl3a	1.53124e-76	-0.959977	0.124	0.392	3.73316e-72	Superficial_Epithelial_0dpa_vs_2dpa	DEG
calm3a.1	2.31244e-76	-0.302721	0.004	0.101	5.63773e-72	Superficial_Epithelial_0dpa_vs_2dpa	DEG
cyp8b2	3.09818e-76	1.41552	0.412	0.057	7.55337e-72	Superficial_Epithelial_0dpa_vs_2dpa	DEG
mmp13a.1	7.5057e-76	-0.738714	0.012	0.134	1.82989e-71	Superficial_Epithelial_0dpa_vs_2dpa	DEG
fhod1	9.35212e-76	1.17102	0.72	0.434	2.28005e-71	Superficial_Epithelial_0dpa_vs_2dpa	DEG
CU207269.2	9.51994e-76	1.18106	0.444	0.084	2.32096e-71	Superficial_Epithelial_0dpa_vs_2dpa	DEG
[truncated: 11,621 more rows]

## Sheet: Table S2B
Supplementary Table S2 Stage DEGs identified in each cell type and GO term enrichement results of shared/dynamic modules
B. Stage DEGs in IE
gene	p_val	avg_log2FC	pct.1	pct.2	p_val_adj	comparison	category
ifrd1	0	0.942768	0.52	0.246	0	Intermediate_Epithelial_0dpa_vs_1dpa	DEG
hsp90b1	0	-1.09953	0.28	0.657	0	Intermediate_Epithelial_0dpa_vs_1dpa	DEG
etnk1	0	2.38243	0.838	0.327	0	Intermediate_Epithelial_0dpa_vs_1dpa	DEG
pfkfb3	0	1.20333	0.337	0.053	0	Intermediate_Epithelial_0dpa_vs_1dpa	DEG
zfhx3	0	-1.50207	0.206	0.666	0	Intermediate_Epithelial_0dpa_vs_1dpa	DEG
lsp1b	0	-0.999255	0.533	0.86	0	Intermediate_Epithelial_0dpa_vs_1dpa	DEG
rassf7b	0	0.992146	0.719	0.484	0	Intermediate_Epithelial_0dpa_vs_1dpa	DEG
dusp19b	0	1.36408	0.542	0.203	0	Intermediate_Epithelial_0dpa_vs_1dpa	DEG
pnp5a	0	1.91601	0.958	0.715	0	Intermediate_Epithelial_0dpa_vs_1dpa	DEG
cxcl8b.1	0	2.77947	0.593	0.191	0	Intermediate_Epithelial_0dpa_vs_1dpa	DEG
si:dkey-85k7.12	0	-1.20597	0.086	0.41	0	Intermediate_Epithelial_0dpa_vs_1dpa	DEG
sb:cb1058	0	-1.6204	0.028	0.488	0	Intermediate_Epithelial_0dpa_vs_1dpa	DEG
tnnt3b	0	-1.08961	0.166	0.479	0	Intermediate_Epithelial_0dpa_vs_1dpa	DEG
txn	0	-2.01728	0.251	0.899	0	Intermediate_Epithelial_0dpa_vs_1dpa	DEG
BX323855.2	0	0.820065	0.374	0.124	0	Intermediate_Epithelial_0dpa_vs_1dpa	DEG
rhpn2	0	1.67697	0.851	0.527	0	Intermediate_Epithelial_0dpa_vs_1dpa	DEG
cd81a	0	-1.48585	0.012	0.367	0	Intermediate_Epithelial_0dpa_vs_1dpa	DEG
mdka	0	-1.42021	0.025	0.375	0	Intermediate_Epithelial_0dpa_vs_1dpa	DEG
rtn3	0	-0.895661	0.623	0.916	0	Intermediate_Epithelial_0dpa_vs_1dpa	DEG
sall1a	0	-1.21324	0.018	0.378	0	Intermediate_Epithelial_0dpa_vs_1dpa	DEG
ano1	0	1.36172	0.556	0.265	0	Intermediate_Epithelial_0dpa_vs_1dpa	DEG
xbp1	0	1.24855	0.893	0.682	0	Intermediate_Epithelial_0dpa_vs_1dpa	DEG
vcana	0	-1.79137	0.001	0.341	0	Intermediate_Epithelial_0dpa_vs_1dpa	DEG
bmpr1ba	0	-1.49057	0.06	0.532	0	Intermediate_Epithelial_0dpa_vs_1dpa	DEG
ctsla	0	-1.16643	0.472	0.862	0	Intermediate_Epithelial_0dpa_vs_1dpa	DEG
zfand5a	0	1.58088	0.843	0.528	0	Intermediate_Epithelial_0dpa_vs_1dpa	DEG
anxa1c	0	-1.69099	0.25	0.729	0	Intermediate_Epithelial_0dpa_vs_1dpa	DEG
vcp	0	-0.833637	0.487	0.78	0	Intermediate_Epithelial_0dpa_vs_1dpa	DEG
nos2a	0	1.01056	0.253	0.034	0	Intermediate_Epithelial_0dpa_vs_1dpa	DEG
ar	0	1.15272	0.424	0.152	0	Intermediate_Epithelial_0dpa_vs_1dpa	DEG
isg15	0	-1.60414	0.094	0.484	0	Intermediate_Epithelial_0dpa_vs_1dpa	DEG
fam169aa	0	0.896863	0.243	0.006	0	Intermediate_Epithelial_0dpa_vs_1dpa	DEG
pappaa	0	0.861871	0.212	0.018	0	Intermediate_Epithelial_0dpa_vs_1dpa	DEG
zgc:194398	0	0.620608	0.181	0.004	0	Intermediate_Epithelial_0dpa_vs_1dpa	DEG
angptl2a	0	-1.5556	0.029	0.516	0	Intermediate_Epithelial_0dpa_vs_1dpa	DEG
hk2	0	1.25366	0.968	0.848	0	Intermediate_Epithelial_0dpa_vs_1dpa	DEG
ndufa4l	0	-0.776012	0.61	0.843	0	Intermediate_Epithelial_0dpa_vs_1dpa	DEG
nfixb	0	1.48633	0.732	0.355	0	Intermediate_Epithelial_0dpa_vs_1dpa	DEG
ddx5	0	0.851751	0.845	0.725	0	Intermediate_Epithelial_0dpa_vs_1dpa	DEG
atp5mc1	0	-0.944017	0.143	0.468	0	Intermediate_Epithelial_0dpa_vs_1dpa	DEG
stk17al	0	1.128	0.514	0.195	0	Intermediate_Epithelial_0dpa_vs_1dpa	DEG
mvp	0	1.58926	0.686	0.418	0	Intermediate_Epithelial_0dpa_vs_1dpa	DEG
stat3	0	1.05837	0.556	0.317	0	Intermediate_Epithelial_0dpa_vs_1dpa	DEG
cygb1	0	-1.20933	0.002	0.258	0	Intermediate_Epithelial_0dpa_vs_1dpa	DEG
si:ch211-76l23.4	0	0.894929	0.219	0.003	0	Intermediate_Epithelial_0dpa_vs_1dpa	DEG
junbb	0	1.27415	0.62	0.287	0	Intermediate_Epithelial_0dpa_vs_1dpa	DEG
mafk	0	1.17381	0.464	0.143	0	Intermediate_Epithelial_0dpa_vs_1dpa	DEG
gdpd3a	0	-0.906625	0.371	0.702	0	Intermediate_Epithelial_0dpa_vs_1dpa	DEG
prkcsh	0	-0.958705	0.18	0.532	0	Intermediate_Epithelial_0dpa_vs_1dpa	DEG
brd4	0	1.13026	0.851	0.646	0	Intermediate_Epithelial_0dpa_vs_1dpa	DEG
notch3	0	-0.81036	0.643	0.85	0	Intermediate_Epithelial_0dpa_vs_1dpa	DEG
sc:d0202.1	0	-1.01056	0.17	0.508	0	Intermediate_Epithelial_0dpa_vs_1dpa	DEG
csnk1da	0	0.991668	0.724	0.503	0	Intermediate_Epithelial_0dpa_vs_1dpa	DEG
dhx58	0	-1.36267	0.081	0.408	0	Intermediate_Epithelial_0dpa_vs_1dpa	DEG
rnf213a	0	-1.4062	0.763	0.94	0	Intermediate_Epithelial_0dpa_vs_1dpa	DEG
ndel1b	0	1.10809	0.606	0.31	0	Intermediate_Epithelial_0dpa_vs_1dpa	DEG
ppap2d	0	-1.25586	0.107	0.434	0	Intermediate_Epithelial_0dpa_vs_1dpa	DEG
crb3a	0	0.961734	0.637	0.385	0	Intermediate_Epithelial_0dpa_vs_1dpa	DEG
metrnla	0	-1.20425	0.105	0.499	0	Intermediate_Epithelial_0dpa_vs_1dpa	DEG
BX908797.1	0	1.35775	0.625	0.257	0	Intermediate_Epithelial_0dpa_vs_1dpa	DEG
krt4	0	-4.7021	0.531	0.999	0	Intermediate_Epithelial_0dpa_vs_1dpa	DEG
sdc4	0	0.909454	0.881	0.81	0	Intermediate_Epithelial_0dpa_vs_1dpa	DEG
tp63	0	-1.55307	0.669	0.948	0	Intermediate_Epithelial_0dpa_vs_1dpa	DEG
hsd17b7	0	2.2579	0.574	0.076	0	Intermediate_Epithelial_0dpa_vs_1dpa	DEG
glulb	0	0.926166	0.743	0.54	0	Intermediate_Epithelial_0dpa_vs_1dpa	DEG
card14	0	1.01623	0.634	0.385	0	Intermediate_Epithelial_0dpa_vs_1dpa	DEG
scinla	0	-0.976419	0.062	0.334	0	Intermediate_Epithelial_0dpa_vs_1dpa	DEG
rhcgl1	0	-0.970159	0.342	0.643	0	Intermediate_Epithelial_0dpa_vs_1dpa	DEG
tnfrsf18	0	2.0444	0.345	0.109	0	Intermediate_Epithelial_0dpa_vs_1dpa	DEG
entpd8	0	0.947781	0.213	0.022	0	Intermediate_Epithelial_0dpa_vs_1dpa	DEG
ddit3	0	1.03518	0.541	0.287	0	Intermediate_Epithelial_0dpa_vs_1dpa	DEG
col7a1	0	-0.890314	0.035	0.283	0	Intermediate_Epithelial_0dpa_vs_1dpa	DEG
prelid3b	0	1.08042	0.743	0.483	0	Intermediate_Epithelial_0dpa_vs_1dpa	DEG
psmb3	0	-0.900327	0.188	0.505	0	Intermediate_Epithelial_0dpa_vs_1dpa	DEG
stat2	0	-0.928101	0.366	0.676	0	Intermediate_Epithelial_0dpa_vs_1dpa	DEG
ptgis	0	1.64524	0.795	0.626	0	Intermediate_Epithelial_0dpa_vs_1dpa	DEG
ahcy	0	1.07281	0.518	0.26	0	Intermediate_Epithelial_0dpa_vs_1dpa	DEG
chmp4ba	0	1.24805	0.742	0.465	0	Intermediate_Epithelial_0dpa_vs_1dpa	DEG
slc2a1b	0	1.19592	0.651	0.347	0	Intermediate_Epithelial_0dpa_vs_1dpa	DEG
cx44.2	0	-1.14604	0.046	0.298	0	Intermediate_Epithelial_0dpa_vs_1dpa	DEG
CABZ01079267.1	0	0.86957	0.783	0.573	0	Intermediate_Epithelial_0dpa_vs_1dpa	DEG
angptl4	0	-1.09734	0.43	0.741	0	Intermediate_Epithelial_0dpa_vs_1dpa	DEG
eef2b	0	0.702694	0.957	0.904	0	Intermediate_Epithelial_0dpa_vs_1dpa	DEG
mycb	0	0.877944	0.29	0.071	0	Intermediate_Epithelial_0dpa_vs_1dpa	DEG
zgc:153654	0	-0.832202	0.06	0.337	0	Intermediate_Epithelial_0dpa_vs_1dpa	DEG
si:ch211-207d6.2	0	-1.01842	0.401	0.691	0	Intermediate_Epithelial_0dpa_vs_1dpa	DEG
cyp8b3	0	0.83699	0.157	0.003	0	Intermediate_Epithelial_0dpa_vs_1dpa	DEG
si:ch211-241e1.3	0	-1.46453	0.301	0.762	0	Intermediate_Epithelial_0dpa_vs_1dpa	DEG
gbp1	0	-0.845082	0.07	0.343	0	Intermediate_Epithelial_0dpa_vs_1dpa	DEG
dad1	0	-1.10912	0.279	0.665	0	Intermediate_Epithelial_0dpa_vs_1dpa	DEG
dspa	0	-1.09677	0.989	1	0	Intermediate_Epithelial_0dpa_vs_1dpa	DEG
eif5a2	0	-0.904671	0.283	0.616	0	Intermediate_Epithelial_0dpa_vs_1dpa	DEG
gk5	0	0.876228	0.317	0.072	0	Intermediate_Epithelial_0dpa_vs_1dpa	DEG
calr3b	0	-1.37656	0.141	0.595	0	Intermediate_Epithelial_0dpa_vs_1dpa	DEG
efr3a	0	-1.28128	0.236	0.656	0	Intermediate_Epithelial_0dpa_vs_1dpa	DEG
plpp2a	0	1.22474	0.678	0.394	0	Intermediate_Epithelial_0dpa_vs_1dpa	DEG
mxb	0	-0.99006	0.033	0.282	0	Intermediate_Epithelial_0dpa_vs_1dpa	DEG
fn1b	0	-5.53415	0.137	0.986	0	Intermediate_Epithelial_0dpa_vs_1dpa	DEG
cd99	0	-0.73432	0.923	0.984	0	Intermediate_Epithelial_0dpa_vs_1dpa	DEG
dnajb1b	0	1.39419	0.597	0.331	0	Intermediate_Epithelial_0dpa_vs_1dpa	DEG
sh3d19	0	-1.2781	0.174	0.569	0	Intermediate_Epithelial_0dpa_vs_1dpa	DEG
tmem154	0	-0.871212	0.224	0.523	0	Intermediate_Epithelial_0dpa_vs_1dpa	DEG
prdx2	0	-0.792729	0.09	0.365	0	Intermediate_Epithelial_0dpa_vs_1dpa	DEG
junba	0	1.16079	0.879	0.719	0	Intermediate_Epithelial_0dpa_vs_1dpa	DEG
nfixa	0	1.32045	0.597	0.234	0	Intermediate_Epithelial_0dpa_vs_1dpa	DEG
si:dkey-56e3.2	0	1.15679	0.688	0.409	0	Intermediate_Epithelial_0dpa_vs_1dpa	DEG
kcnq5b	0	2.31086	0.552	0.02	0	Intermediate_Epithelial_0dpa_vs_1dpa	DEG
jag1a	0	-1.4572	0.293	0.739	0	Intermediate_Epithelial_0dpa_vs_1dpa	DEG
FO834828.1	0	1.07588	0.256	0.047	0	Intermediate_Epithelial_0dpa_vs_1dpa	DEG
FO834828.2	0	1.26058	0.582	0.23	0	Intermediate_Epithelial_0dpa_vs_1dpa	DEG
FO681323.1	0	1.54622	0.826	0.474	0	Intermediate_Epithelial_0dpa_vs_1dpa	DEG
fn1a	0	-1.53674	0.009	0.374	0	Intermediate_Epithelial_0dpa_vs_1dpa	DEG
glsb	0	1.14202	0.631	0.42	0	Intermediate_Epithelial_0dpa_vs_1dpa	DEG
nab1b	0	1.02968	0.444	0.174	0	Intermediate_Epithelial_0dpa_vs_1dpa	DEG
adarb1b	0	1.13969	0.721	0.49	0	Intermediate_Epithelial_0dpa_vs_1dpa	DEG
f5	0	-3.25811	0.022	0.847	0	Intermediate_Epithelial_0dpa_vs_1dpa	DEG
hdac4	0	1.44591	0.96	0.846	0	Intermediate_Epithelial_0dpa_vs_1dpa	DEG
igsf3	0	-1.83422	0.006	0.452	0	Intermediate_Epithelial_0dpa_vs_1dpa	DEG
tfpia	0	-1.01411	0.305	0.669	0	Intermediate_Epithelial_0dpa_vs_1dpa	DEG
ednrbb	0	-1.92619	0.026	0.502	0	Intermediate_Epithelial_0dpa_vs_1dpa	DEG
lmo7a	0	1.16273	0.883	0.832	0	Intermediate_Epithelial_0dpa_vs_1dpa	DEG
fam117bb	0	1.52907	0.513	0.147	0	Intermediate_Epithelial_0dpa_vs_1dpa	DEG
GALNT3	0	0.985419	0.468	0.202	0	Intermediate_Epithelial_0dpa_vs_1dpa	DEG
CU984600.2	0	-2.17237	0.275	0.792	0	Intermediate_Epithelial_0dpa_vs_1dpa	DEG
tmsb4x	0	-0.907652	0.841	0.976	0	Intermediate_Epithelial_0dpa_vs_1dpa	DEG
fbxl3a	0	-1.1088	0.078	0.458	0	Intermediate_Epithelial_0dpa_vs_1dpa	DEG
si:ch211-105c13.3	0	-1.72764	0.286	0.814	0	Intermediate_Epithelial_0dpa_vs_1dpa	DEG
slc4a7	0	1.71519	0.713	0.342	0	Intermediate_Epithelial_0dpa_vs_1dpa	DEG
si:dkey-79d12.5	0	1.06707	0.725	0.496	0	Intermediate_Epithelial_0dpa_vs_1dpa	DEG
grhl2a	0	-1.08967	0.433	0.778	0	Intermediate_Epithelial_0dpa_vs_1dpa	DEG
pnrc2	0	1.3392	0.919	0.794	0	Intermediate_Epithelial_0dpa_vs_1dpa	DEG
s100a10b	0	-1.41442	0.831	0.987	0	Intermediate_Epithelial_0dpa_vs_1dpa	DEG
ptpn3	0	-1.16797	0.262	0.626	0	Intermediate_Epithelial_0dpa_vs_1dpa	DEG
icn2	0	1.21449	0.976	0.836	0	Intermediate_Epithelial_0dpa_vs_1dpa	DEG
rpz5	0	-1.0002	0.299	0.676	0	Intermediate_Epithelial_0dpa_vs_1dpa	DEG
tmem176l.1	0	-0.881137	0.091	0.402	0	Intermediate_Epithelial_0dpa_vs_1dpa	DEG
tmem176l.4	0	-1.36053	0.656	0.958	0	Intermediate_Epithelial_0dpa_vs_1dpa	DEG
zgc:173729	0	-1.23244	0.305	0.725	0	Intermediate_Epithelial_0dpa_vs_1dpa	DEG
si:ch73-22o12.1	0	0.968883	0.953	0.912	0	Intermediate_Epithelial_0dpa_vs_1dpa	DEG
nr4a3	0	1.34921	0.36	0.082	0	Intermediate_Epithelial_0dpa_vs_1dpa	DEG
sult2st3	0	1.33906	0.362	0.015	0	Intermediate_Epithelial_0dpa_vs_1dpa	DEG
cmtm6	0	-0.912206	0.237	0.568	0	Intermediate_Epithelial_0dpa_vs_1dpa	DEG
ctsk	0	-0.871129	0.267	0.575	0	Intermediate_Epithelial_0dpa_vs_1dpa	DEG
abcb5	0	1.0857	0.3	0.055	0	Intermediate_Epithelial_0dpa_vs_1dpa	DEG
ctnnb1	0	-0.863717	0.412	0.707	0	Intermediate_Epithelial_0dpa_vs_1dpa	DEG
triob	0	-0.897415	0.192	0.516	0	Intermediate_Epithelial_0dpa_vs_1dpa	DEG
gmds	0	1.41108	0.754	0.562	0	Intermediate_Epithelial_0dpa_vs_1dpa	DEG
cep85l	0	-0.981651	0.348	0.668	0	Intermediate_Epithelial_0dpa_vs_1dpa	DEG
dsc2l	0	-0.666828	0.989	0.999	0	Intermediate_Epithelial_0dpa_vs_1dpa	DEG
daam1b	0	-1.7846	0.281	0.858	0	Intermediate_Epithelial_0dpa_vs_1dpa	DEG
ezrb	0	1.76467	0.936	0.793	0	Intermediate_Epithelial_0dpa_vs_1dpa	DEG
rhov	0	-0.987681	0.576	0.862	0	Intermediate_Epithelial_0dpa_vs_1dpa	DEG
ywhaqa	0	-1.27144	0.235	0.651	0	Intermediate_Epithelial_0dpa_vs_1dpa	DEG
palld	0	-0.628891	0.278	0.7	0	Intermediate_Epithelial_0dpa_vs_1dpa	DEG
sptlc2b	0	0.903541	0.836	0.732	0	Intermediate_Epithelial_0dpa_vs_1dpa	DEG
nkx3-1	0	0.942368	0.309	0.068	0	Intermediate_Epithelial_0dpa_vs_1dpa	DEG
nfic	0	1.17812	0.486	0.181	0	Intermediate_Epithelial_0dpa_vs_1dpa	DEG
dynll1	0	-1.52097	0.28	0.781	0	Intermediate_Epithelial_0dpa_vs_1dpa	DEG
sema6bb	0	-1.14054	0.033	0.353	0	Intermediate_Epithelial_0dpa_vs_1dpa	DEG
cox6a1	0	-0.994671	0.415	0.759	0	Intermediate_Epithelial_0dpa_vs_1dpa	DEG
slc25a25a	0	1.05948	0.496	0.2	0	Intermediate_Epithelial_0dpa_vs_1dpa	DEG
slc23a2	0	2.14913	0.746	0.261	0	Intermediate_Epithelial_0dpa_vs_1dpa	DEG
atp2a2a	0	0.887847	0.387	0.133	0	Intermediate_Epithelial_0dpa_vs_1dpa	DEG
gstm.3	0	-1.06742	0.057	0.39	0	Intermediate_Epithelial_0dpa_vs_1dpa	DEG
pptc7a	0	1.13225	0.694	0.451	0	Intermediate_Epithelial_0dpa_vs_1dpa	DEG
ggt1a	0	-1.41366	0.012	0.355	0	Intermediate_Epithelial_0dpa_vs_1dpa	DEG
csf1b	0	0.919993	0.219	0.008	0	Intermediate_Epithelial_0dpa_vs_1dpa	DEG
slc38a5a	0	0.883232	0.825	0.66	0	Intermediate_Epithelial_0dpa_vs_1dpa	DEG
calr	0	-0.782138	0.046	0.307	0	Intermediate_Epithelial_0dpa_vs_1dpa	DEG
pdlim2	0	1.24188	0.758	0.535	0	Intermediate_Epithelial_0dpa_vs_1dpa	DEG
psma3	0	-0.991543	0.148	0.502	0	Intermediate_Epithelial_0dpa_vs_1dpa	DEG
ralgapa2	0	1.17329	0.634	0.373	0	Intermediate_Epithelial_0dpa_vs_1dpa	DEG
tmem30b	0	-0.838741	0.314	0.631	0	Intermediate_Epithelial_0dpa_vs_1dpa	DEG
entpd6	0	1.02701	0.452	0.147	0	Intermediate_Epithelial_0dpa_vs_1dpa	DEG
kif13ba	0	-0.866935	0.08	0.382	0	Intermediate_Epithelial_0dpa_vs_1dpa	DEG
ywhaqb	0	-1.74165	0.692	0.975	0	Intermediate_Epithelial_0dpa_vs_1dpa	DEG
ezra	0	1.25711	0.693	0.419	0	Intermediate_Epithelial_0dpa_vs_1dpa	DEG
papss2a	0	0.818423	0.321	0.09	0	Intermediate_Epithelial_0dpa_vs_1dpa	DEG
spint1a	0	0.678621	0.922	0.871	0	Intermediate_Epithelial_0dpa_vs_1dpa	DEG
spink2.1	0	1.5936	0.493	0.076	0	Intermediate_Epithelial_0dpa_vs_1dpa	DEG
diaph2	0	1.27521	0.817	0.634	0	Intermediate_Epithelial_0dpa_vs_1dpa	DEG
aldob	0	1.21394	0.482	0.123	0	Intermediate_Epithelial_0dpa_vs_1dpa	DEG
CR383676.2	0	1.01324	0.974	0.977	0	Intermediate_Epithelial_0dpa_vs_1dpa	DEG
elf1	0	1.00643	0.927	0.835	0	Intermediate_Epithelial_0dpa_vs_1dpa	DEG
cd74a	0	1.06542	0.907	0.61	0	Intermediate_Epithelial_0dpa_vs_1dpa	DEG
egr1	0	1.57888	0.513	0.131	0	Intermediate_Epithelial_0dpa_vs_1dpa	DEG
canx	0	-0.88441	0.524	0.82	0	Intermediate_Epithelial_0dpa_vs_1dpa	DEG
slc25a5	0	0.666048	0.942	0.909	0	Intermediate_Epithelial_0dpa_vs_1dpa	DEG
fosl1a	0	2.14915	0.941	0.58	0	Intermediate_Epithelial_0dpa_vs_1dpa	DEG
LO018188.1	0	-0.838445	0.025	0.285	0	Intermediate_Epithelial_0dpa_vs_1dpa	DEG
cfd	0	1.74498	0.359	0.002	0	Intermediate_Epithelial_0dpa_vs_1dpa	DEG
syne2b	0	0.929536	0.329	0.076	0	Intermediate_Epithelial_0dpa_vs_1dpa	DEG
zgc:153911	0	0.864639	0.971	0.943	0	Intermediate_Epithelial_0dpa_vs_1dpa	DEG
si:dkey-157l19.2	0	-0.947299	0.239	0.588	0	Intermediate_Epithelial_0dpa_vs_1dpa	DEG
rsrp1	0	1.32552	0.868	0.605	0	Intermediate_Epithelial_0dpa_vs_1dpa	DEG
cfl1l	0	-0.772803	0.841	0.964	0	Intermediate_Epithelial_0dpa_vs_1dpa	DEG
ifi45	0	-1.98317	0.185	0.689	0	Intermediate_Epithelial_0dpa_vs_1dpa	DEG
psmb1	0	-1.50264	0.188	0.696	0	Intermediate_Epithelial_0dpa_vs_1dpa	DEG
perp	0	-1.09532	0.996	1	0	Intermediate_Epithelial_0dpa_vs_1dpa	DEG
zgc:152791	0	-1.39887	0.423	0.753	0	Intermediate_Epithelial_0dpa_vs_1dpa	DEG
ifi46	0	-1.58496	0.259	0.729	0	Intermediate_Epithelial_0dpa_vs_1dpa	DEG
marcksl1a	0	-2.24542	0.062	0.674	0	Intermediate_Epithelial_0dpa_vs_1dpa	DEG
actn1	0	-1.39852	0.032	0.459	0	Intermediate_Epithelial_0dpa_vs_1dpa	DEG
zgc:193505	0	1.51421	0.972	0.822	0	Intermediate_Epithelial_0dpa_vs_1dpa	DEG
arg2	0	0.964508	0.316	0.056	0	Intermediate_Epithelial_0dpa_vs_1dpa	DEG
adam8a	0	-3.48634	0.002	0.799	0	Intermediate_Epithelial_0dpa_vs_1dpa	DEG
sgpl1	0	-0.914454	0.104	0.427	0	Intermediate_Epithelial_0dpa_vs_1dpa	DEG
anxa11a	0	1.97849	0.954	0.81	0	Intermediate_Epithelial_0dpa_vs_1dpa	DEG
FRMD1	0	-0.851331	0.299	0.604	0	Intermediate_Epithelial_0dpa_vs_1dpa	DEG
zswim8	0	-1.17605	0.102	0.475	0	Intermediate_Epithelial_0dpa_vs_1dpa	DEG
ggps1	0	1.48294	0.758	0.387	0	Intermediate_Epithelial_0dpa_vs_1dpa	DEG
CABZ01072077.1	0	1.14749	0.327	0.052	0	Intermediate_Epithelial_0dpa_vs_1dpa	DEG
ppp1r13l	0	-0.877835	0.427	0.714	0	Intermediate_Epithelial_0dpa_vs_1dpa	DEG
sema6dl	0	-0.944015	0.393	0.749	0	Intermediate_Epithelial_0dpa_vs_1dpa	DEG
nedd4a	0	1.20455	0.408	0.111	0	Intermediate_Epithelial_0dpa_vs_1dpa	DEG
aplp2	0	-0.625411	0.646	0.876	0	Intermediate_Epithelial_0dpa_vs_1dpa	DEG
cd151l	0	-0.93121	0.241	0.585	0	Intermediate_Epithelial_0dpa_vs_1dpa	DEG
tspan9a	0	-1.46104	0.278	0.714	0	Intermediate_Epithelial_0dpa_vs_1dpa	DEG
pard6a	0	1.81258	0.568	0.154	0	Intermediate_Epithelial_0dpa_vs_1dpa	DEG
ssr3	0	-0.81346	0.332	0.621	0	Intermediate_Epithelial_0dpa_vs_1dpa	DEG
si:ch211-132b12.7	0	0.826247	0.364	0.119	0	Intermediate_Epithelial_0dpa_vs_1dpa	DEG
btbd11b	0	-1.58222	0.024	0.399	0	Intermediate_Epithelial_0dpa_vs_1dpa	DEG
srpra	0	1.0717	0.641	0.351	0	Intermediate_Epithelial_0dpa_vs_1dpa	DEG
ccnl1a	0	1.24904	0.686	0.419	0	Intermediate_Epithelial_0dpa_vs_1dpa	DEG
timp2a	0	-1.42565	0.501	0.883	0	Intermediate_Epithelial_0dpa_vs_1dpa	DEG
capgb	0	-0.925856	0.286	0.621	0	Intermediate_Epithelial_0dpa_vs_1dpa	DEG
reep3b	0	0.948996	0.933	0.854	0	Intermediate_Epithelial_0dpa_vs_1dpa	DEG
rbp4	0	1.07395	0.255	0.007	0	Intermediate_Epithelial_0dpa_vs_1dpa	DEG
snx11	0	-1.01279	0.156	0.523	0	Intermediate_Epithelial_0dpa_vs_1dpa	DEG
chac2	0	1.25503	0.348	0.073	0	Intermediate_Epithelial_0dpa_vs_1dpa	DEG
tob1b	0	0.912117	0.816	0.674	0	Intermediate_Epithelial_0dpa_vs_1dpa	DEG
oat	0	0.952614	0.337	0.065	0	Intermediate_Epithelial_0dpa_vs_1dpa	DEG
cxl34c	0	-3.42215	0.021	0.787	0	Intermediate_Epithelial_0dpa_vs_1dpa	DEG
etv4	0	-0.735038	0.02	0.256	0	Intermediate_Epithelial_0dpa_vs_1dpa	DEG
rnf213b	0	-1.43287	0.208	0.586	0	Intermediate_Epithelial_0dpa_vs_1dpa	DEG
arhgap17a	0	-0.911303	0.461	0.781	0	Intermediate_Epithelial_0dpa_vs_1dpa	DEG
CABZ01048956.1	0	1.23785	0.428	0.162	0	Intermediate_Epithelial_0dpa_vs_1dpa	DEG
hivep1	0	-0.678845	0.719	0.901	0	Intermediate_Epithelial_0dpa_vs_1dpa	DEG
ptp4a2b	0	1.85673	0.909	0.576	0	Intermediate_Epithelial_0dpa_vs_1dpa	DEG
arhgef1a	0	-1.19757	0.023	0.389	0	Intermediate_Epithelial_0dpa_vs_1dpa	DEG
osbpl3a	0	1.30233	0.859	0.695	0	Intermediate_Epithelial_0dpa_vs_1dpa	DEG
fabp11a	0	-1.16646	0	0.265	0	Intermediate_Epithelial_0dpa_vs_1dpa	DEG
tnfrsf11b	0	2.86211	0.548	0.046	0	Intermediate_Epithelial_0dpa_vs_1dpa	DEG
psmb4	0	-0.812749	0.146	0.438	0	Intermediate_Epithelial_0dpa_vs_1dpa	DEG
eppk1	0	-2.57029	0.814	0.998	0	Intermediate_Epithelial_0dpa_vs_1dpa	DEG
s100v2	0	-1.15631	0.51	0.844	0	Intermediate_Epithelial_0dpa_vs_1dpa	DEG
mcl1a	0	0.840257	0.966	0.918	0	Intermediate_Epithelial_0dpa_vs_1dpa	DEG
brd2a	0	1.08191	0.839	0.658	0	Intermediate_Epithelial_0dpa_vs_1dpa	DEG
ywhaz	0	-1.03534	0.837	0.981	0	Intermediate_Epithelial_0dpa_vs_1dpa	DEG
sox4a	0	-1.31673	0.07	0.485	0	Intermediate_Epithelial_0dpa_vs_1dpa	DEG
sfpq	0	0.872395	0.759	0.59	0	Intermediate_Epithelial_0dpa_vs_1dpa	DEG
eef1a1l1	0	0.737337	0.993	0.987	0	Intermediate_Epithelial_0dpa_vs_1dpa	DEG
arhgap32a	0	-1.938	0.059	0.585	0	Intermediate_Epithelial_0dpa_vs_1dpa	DEG
foxo1a	0	1.11636	0.893	0.768	0	Intermediate_Epithelial_0dpa_vs_1dpa	DEG
myo1cb	0	-1.05784	0.597	0.906	0	Intermediate_Epithelial_0dpa_vs_1dpa	DEG
relb	0	-0.802888	0.248	0.562	0	Intermediate_Epithelial_0dpa_vs_1dpa	DEG
zgc:154093	0	-1.16822	0.068	0.426	0	Intermediate_Epithelial_0dpa_vs_1dpa	DEG
ssh2a	0	1.03449	0.725	0.477	0	Intermediate_Epithelial_0dpa_vs_1dpa	DEG
vmp1	0	-3.23186	0.191	0.861	0	Intermediate_Epithelial_0dpa_vs_1dpa	DEG
traf4a	0	2.74801	0.812	0.214	0	Intermediate_Epithelial_0dpa_vs_1dpa	DEG
robo1	0	-1.43368	0.292	0.761	0	Intermediate_Epithelial_0dpa_vs_1dpa	DEG
si:dkey-262k9.2	0	-1.26694	0.937	0.992	0	Intermediate_Epithelial_0dpa_vs_1dpa	DEG
zbtb16b	0	1.88442	0.53	0.053	0	Intermediate_Epithelial_0dpa_vs_1dpa	DEG
ENSDARG00000115101	0	-1.24441	0.135	0.505	0	Intermediate_Epithelial_0dpa_vs_1dpa	DEG
zgc:162730	0	1.1137	0.872	0.666	0	Intermediate_Epithelial_0dpa_vs_1dpa	DEG
actn4	0	1.4553	0.988	0.952	0	Intermediate_Epithelial_0dpa_vs_1dpa	DEG
pdgfd	0	-0.945683	0.049	0.346	0	Intermediate_Epithelial_0dpa_vs_1dpa	DEG
vwa1	0	-2.01287	0.203	0.786	0	Intermediate_Epithelial_0dpa_vs_1dpa	DEG
ddost	0	-0.881636	0.188	0.52	0	Intermediate_Epithelial_0dpa_vs_1dpa	DEG
nr4a1	0	1.18837	0.431	0.133	0	Intermediate_Epithelial_0dpa_vs_1dpa	DEG
kif1b	0	-1.14013	0.163	0.532	0	Intermediate_Epithelial_0dpa_vs_1dpa	DEG
b4galt5	0	1.11791	0.623	0.311	0	Intermediate_Epithelial_0dpa_vs_1dpa	DEG
plxnb1a	0	-0.897883	0.036	0.326	0	Intermediate_Epithelial_0dpa_vs_1dpa	DEG
plxna2	0	-2.25235	0.02	0.621	0	Intermediate_Epithelial_0dpa_vs_1dpa	DEG
krt5	0	-0.906476	0.999	1	0	Intermediate_Epithelial_0dpa_vs_1dpa	DEG
krt8	0	-1.7754	0.189	0.732	0	Intermediate_Epithelial_0dpa_vs_1dpa	DEG
krt18a.1	0	-5.87202	0.091	0.998	0	Intermediate_Epithelial_0dpa_vs_1dpa	DEG
itga5	0	-1.84526	0.007	0.518	0	Intermediate_Epithelial_0dpa_vs_1dpa	DEG
sdcbp2	0	0.95614	0.913	0.812	0	Intermediate_Epithelial_0dpa_vs_1dpa	DEG
pard6b	0	1.61425	0.646	0.248	0	Intermediate_Epithelial_0dpa_vs_1dpa	DEG
si:dkey-126g1.7	0	-0.9081	0.004	0.306	0	Intermediate_Epithelial_0dpa_vs_1dpa	DEG
plekhn1	0	1.33499	0.85	0.681	0	Intermediate_Epithelial_0dpa_vs_1dpa	DEG
plekhg5b	0	-1.10153	0.243	0.614	0	Intermediate_Epithelial_0dpa_vs_1dpa	DEG
cox8a	0	-0.801811	0.325	0.617	0	Intermediate_Epithelial_0dpa_vs_1dpa	DEG
myo5b	0	0.849757	0.89	0.81	0	Intermediate_Epithelial_0dpa_vs_1dpa	DEG
lifrb	0	-1.30838	0.478	0.852	0	Intermediate_Epithelial_0dpa_vs_1dpa	DEG
rai14	0	-1.39248	0.086	0.487	0	Intermediate_Epithelial_0dpa_vs_1dpa	DEG
tnfrsfa	0	1.31797	0.961	0.85	0	Intermediate_Epithelial_0dpa_vs_1dpa	DEG
zbtb16a	0	2.47988	0.705	0.133	0	Intermediate_Epithelial_0dpa_vs_1dpa	DEG
cast	0	0.916853	0.987	0.975	0	Intermediate_Epithelial_0dpa_vs_1dpa	DEG
ly6m2	0	-1.86627	0.049	0.432	0	Intermediate_Epithelial_0dpa_vs_1dpa	DEG
slco2b1	0	1.44105	0.581	0.218	0	Intermediate_Epithelial_0dpa_vs_1dpa	DEG
prodha	0	1.38528	0.549	0.227	0	Intermediate_Epithelial_0dpa_vs_1dpa	DEG
niban2a	0	0.973289	0.91	0.799	0	Intermediate_Epithelial_0dpa_vs_1dpa	DEG
pof1b	0	-0.641399	0.844	0.943	0	Intermediate_Epithelial_0dpa_vs_1dpa	DEG
pomp	0	-0.878814	0.155	0.449	0	Intermediate_Epithelial_0dpa_vs_1dpa	DEG
glrx	0	-0.899071	0.112	0.433	0	Intermediate_Epithelial_0dpa_vs_1dpa	DEG
arrdc1b	0	1.13223	0.804	0.575	0	Intermediate_Epithelial_0dpa_vs_1dpa	DEG
klf4	0	1.77717	0.494	0.187	0	Intermediate_Epithelial_0dpa_vs_1dpa	DEG
cd74b	0	0.77192	0.91	0.732	0	Intermediate_Epithelial_0dpa_vs_1dpa	DEG
TCF4	0	1.81535	0.872	0.493	0	Intermediate_Epithelial_0dpa_vs_1dpa	DEG
gig2l	0	-1.5896	0.182	0.62	0	Intermediate_Epithelial_0dpa_vs_1dpa	DEG
trib3	0	1.12224	0.623	0.308	0	Intermediate_Epithelial_0dpa_vs_1dpa	DEG
krt93	0	-4.52805	0.154	0.985	0	Intermediate_Epithelial_0dpa_vs_1dpa	DEG
krt94	0	-4.29437	0.329	0.996	0	Intermediate_Epithelial_0dpa_vs_1dpa	DEG
il17rc	0	1.27001	0.721	0.382	0	Intermediate_Epithelial_0dpa_vs_1dpa	DEG
gnai2a	0	-0.797984	0.614	0.871	0	Intermediate_Epithelial_0dpa_vs_1dpa	DEG
jupa	0	0.818017	0.994	0.995	0	Intermediate_Epithelial_0dpa_vs_1dpa	DEG
atp5f1b	0	-0.915133	0.389	0.702	0	Intermediate_Epithelial_0dpa_vs_1dpa	DEG
si:ch211-69b7.6	0	2.17961	0.89	0.616	0	Intermediate_Epithelial_0dpa_vs_1dpa	DEG
alas1	0	0.958329	0.569	0.3	0	Intermediate_Epithelial_0dpa_vs_1dpa	DEG
si:ch211-1a19.3	0	-2.07953	0.121	0.599	0	Intermediate_Epithelial_0dpa_vs_1dpa	DEG
cpne1	0	-0.876591	0.287	0.603	0	Intermediate_Epithelial_0dpa_vs_1dpa	DEG
ccl25b	0	2.46331	0.465	0.048	0	Intermediate_Epithelial_0dpa_vs_1dpa	DEG
foxp4	0	-1.12207	0.407	0.7	0	Intermediate_Epithelial_0dpa_vs_1dpa	DEG
MDFI	0	-1.09958	0.054	0.367	0	Intermediate_Epithelial_0dpa_vs_1dpa	DEG
ier2b	0	1.30089	0.897	0.659	0	Intermediate_Epithelial_0dpa_vs_1dpa	DEG
ENSDARG00000098374	0	-1.0763	0.446	0.741	0	Intermediate_Epithelial_0dpa_vs_1dpa	DEG
prkcdb	0	1.66543	0.757	0.364	0	Intermediate_Epithelial_0dpa_vs_1dpa	DEG
nrarpa	0	-1.16243	0.395	0.744	0	Intermediate_Epithelial_0dpa_vs_1dpa	DEG
il6st	0	1.36168	0.746	0.585	0	Intermediate_Epithelial_0dpa_vs_1dpa	DEG
igsf5a	0	1.1627	0.373	0.12	0	Intermediate_Epithelial_0dpa_vs_1dpa	DEG
rxfp2a	0	1.21623	0.497	0.143	0	Intermediate_Epithelial_0dpa_vs_1dpa	DEG
ehbp1l1b	0	-1.33396	0.042	0.401	0	Intermediate_Epithelial_0dpa_vs_1dpa	DEG
foxo1b	0	1.18088	0.405	0.134	0	Intermediate_Epithelial_0dpa_vs_1dpa	DEG
slc20a1b	0	1.28254	0.801	0.614	0	Intermediate_Epithelial_0dpa_vs_1dpa	DEG
rassf6	0	1.07593	0.417	0.15	0	Intermediate_Epithelial_0dpa_vs_1dpa	DEG
si:busm1-57f23.1	0	-2.28212	0.432	0.951	0	Intermediate_Epithelial_0dpa_vs_1dpa	DEG
auts2a	0	1.07932	0.323	0.093	0	Intermediate_Epithelial_0dpa_vs_1dpa	DEG
ccl27b	0	0.599827	0.167	0.007	0	Intermediate_Epithelial_0dpa_vs_1dpa	DEG
CABZ01073795.1	0	-1.25135	0.064	0.411	0	Intermediate_Epithelial_0dpa_vs_1dpa	DEG
ptgdsb.1	0	1.31711	0.343	0.003	0	Intermediate_Epithelial_0dpa_vs_1dpa	DEG
zgc:56095	0	-0.960864	0.026	0.343	0	Intermediate_Epithelial_0dpa_vs_1dpa	DEG
klf6a	0	-0.893629	0.355	0.645	0	Intermediate_Epithelial_0dpa_vs_1dpa	DEG
cst14a.2	0	-0.968306	0.155	0.496	0	Intermediate_Epithelial_0dpa_vs_1dpa	DEG
pdcd6	0	1.12004	0.754	0.622	0	Intermediate_Epithelial_0dpa_vs_1dpa	DEG
nrp1a	0	-1.10466	0.193	0.579	0	Intermediate_Epithelial_0dpa_vs_1dpa	DEG
slc51a	0	1.00734	0.152	0.004	0	Intermediate_Epithelial_0dpa_vs_1dpa	DEG
fndc3bb	0	1.35071	0.584	0.284	0	Intermediate_Epithelial_0dpa_vs_1dpa	DEG
zgc:195173	0	-1.6071	0.17	0.695	0	Intermediate_Epithelial_0dpa_vs_1dpa	DEG
csrnp1b	0	1.06686	0.416	0.141	0	Intermediate_Epithelial_0dpa_vs_1dpa	DEG
dusp5	0	1.19142	0.837	0.687	0	Intermediate_Epithelial_0dpa_vs_1dpa	DEG
pfn2	0	-0.792049	0.572	0.837	0	Intermediate_Epithelial_0dpa_vs_1dpa	DEG
calr3a	0	-1.42108	0.192	0.661	0	Intermediate_Epithelial_0dpa_vs_1dpa	DEG
mxi1	0	-1.01206	0.324	0.696	0	Intermediate_Epithelial_0dpa_vs_1dpa	DEG
tjp3	0	0.843409	0.83	0.741	0	Intermediate_Epithelial_0dpa_vs_1dpa	DEG
elf3	0	1.42613	0.49	0.14	0	Intermediate_Epithelial_0dpa_vs_1dpa	DEG
SBNO2	0	1.34344	0.911	0.704	0	Intermediate_Epithelial_0dpa_vs_1dpa	DEG
nppc	0	-2.11728	0.008	0.357	0	Intermediate_Epithelial_0dpa_vs_1dpa	DEG
tpm4a	0	-1.73877	0.018	0.415	0	Intermediate_Epithelial_0dpa_vs_1dpa	DEG
krt97	0	-1.1817	0.673	0.969	0	Intermediate_Epithelial_0dpa_vs_1dpa	DEG
mgat5	0	1.13764	0.59	0.283	0	Intermediate_Epithelial_0dpa_vs_1dpa	DEG
btg2	0	1.50098	0.725	0.398	0	Intermediate_Epithelial_0dpa_vs_1dpa	DEG
lsp1a	0	-1.84122	0.19	0.807	0	Intermediate_Epithelial_0dpa_vs_1dpa	DEG
ptprz1a	0	-1.22221	0.052	0.433	0	Intermediate_Epithelial_0dpa_vs_1dpa	DEG
rsl24d1	0	1.17759	0.558	0.218	0	Intermediate_Epithelial_0dpa_vs_1dpa	DEG
pkp3a	0	0.807834	0.998	0.997	0	Intermediate_Epithelial_0dpa_vs_1dpa	DEG
tbc1d2b	0	-0.981707	0.073	0.379	0	Intermediate_Epithelial_0dpa_vs_1dpa	DEG
ppib	0	-1.27163	0.365	0.777	0	Intermediate_Epithelial_0dpa_vs_1dpa	DEG
akap13	0	-1.13244	0.306	0.687	0	Intermediate_Epithelial_0dpa_vs_1dpa	DEG
anxa2a	0	-1.10849	0.742	0.95	0	Intermediate_Epithelial_0dpa_vs_1dpa	DEG
hsd17b12a	0	1.38681	0.781	0.657	0	Intermediate_Epithelial_0dpa_vs_1dpa	DEG
nav2b	0	0.970708	0.721	0.522	0	Intermediate_Epithelial_0dpa_vs_1dpa	DEG
pdia3	0	-1.42982	0.337	0.776	0	Intermediate_Epithelial_0dpa_vs_1dpa	DEG
mt-nd1	0	-0.521463	0.964	0.992	0	Intermediate_Epithelial_0dpa_vs_1dpa	DEG
mt-atp6	0	-0.954393	0.987	0.999	0	Intermediate_Epithelial_0dpa_vs_1dpa	DEG
mt-cyb	0	-0.579912	0.996	0.999	0	Intermediate_Epithelial_0dpa_vs_1dpa	DEG
si:dkey-248g15.3	7.15509e-308	-0.643442	0.993	0.999	1.74441e-303	Intermediate_Epithelial_0dpa_vs_1dpa	DEG
bzw1b	7.57704e-308	0.831873	0.826	0.689	1.84728e-303	Intermediate_Epithelial_0dpa_vs_1dpa	DEG
slc35f6	8.47373e-308	-0.828127	0.093	0.367	2.0659e-303	Intermediate_Epithelial_0dpa_vs_1dpa	DEG
prickle1a	1.58187e-307	-0.843361	0.164	0.455	3.85661e-303	Intermediate_Epithelial_0dpa_vs_1dpa	DEG
rab11fip1a	2.59474e-307	0.954073	0.556	0.297	6.32597e-303	Intermediate_Epithelial_0dpa_vs_1dpa	DEG
zgc:174888	5.19811e-307	0.799274	0.22	0.034	1.2673e-302	Intermediate_Epithelial_0dpa_vs_1dpa	DEG
si:ch211-98n17.5	2.34589e-306	1.25638	0.466	0.202	5.71928e-302	Intermediate_Epithelial_0dpa_vs_1dpa	DEG
sec24d	4.38363e-306	0.86272	0.507	0.246	1.06873e-301	Intermediate_Epithelial_0dpa_vs_1dpa	DEG
selenof	5.79048e-306	-0.77799	0.287	0.585	1.41172e-301	Intermediate_Epithelial_0dpa_vs_1dpa	DEG
psme1	8.4217e-305	-0.831119	0.168	0.456	2.05321e-300	Intermediate_Epithelial_0dpa_vs_1dpa	DEG
pcdh1a	4.34239e-304	0.8603	0.162	0.009	1.05867e-299	Intermediate_Epithelial_0dpa_vs_1dpa	DEG
gtpbp4	6.64206e-302	0.764809	0.341	0.107	1.61933e-297	Intermediate_Epithelial_0dpa_vs_1dpa	DEG
si:ch211-125o16.4	1.24479e-300	0.925916	0.418	0.164	3.0348e-296	Intermediate_Epithelial_0dpa_vs_1dpa	DEG
scel	2.24248e-300	0.817299	0.923	0.893	5.46717e-296	Intermediate_Epithelial_0dpa_vs_1dpa	DEG
mt-nd2	3.29711e-300	-0.492054	0.927	0.981	8.03835e-296	Intermediate_Epithelial_0dpa_vs_1dpa	DEG
arhgef4	5.59562e-300	0.720593	0.893	0.819	1.36421e-295	Intermediate_Epithelial_0dpa_vs_1dpa	DEG
pparab	8.70111e-300	0.687034	0.286	0.069	2.12133e-295	Intermediate_Epithelial_0dpa_vs_1dpa	DEG
mat2ab	3.86847e-299	0.798298	0.367	0.126	9.43132e-295	Intermediate_Epithelial_0dpa_vs_1dpa	DEG
cxcl12a	1.02351e-298	0.610507	0.137	0.002	2.49532e-294	Intermediate_Epithelial_0dpa_vs_1dpa	DEG
CABZ01030282.1	1.54265e-298	0.801592	0.175	0.015	3.76099e-294	Intermediate_Epithelial_0dpa_vs_1dpa	DEG
pdlim4	2.49855e-298	-0.973915	0.186	0.482	6.09147e-294	Intermediate_Epithelial_0dpa_vs_1dpa	DEG
baiap2a	7.51833e-298	0.528236	0.99	0.975	1.83297e-293	Intermediate_Epithelial_0dpa_vs_1dpa	DEG
enah	1.11652e-297	-0.922377	0.505	0.756	2.72207e-293	Intermediate_Epithelial_0dpa_vs_1dpa	DEG
pdia6	1.90365e-297	-0.812839	0.17	0.46	4.6411e-293	Intermediate_Epithelial_0dpa_vs_1dpa	DEG
psma4	2.87881e-296	-0.774368	0.146	0.429	7.01854e-292	Intermediate_Epithelial_0dpa_vs_1dpa	DEG
fkbp1aa	1.45497e-295	-0.794677	0.205	0.493	3.54721e-291	Intermediate_Epithelial_0dpa_vs_1dpa	DEG
slc25a33	3.32445e-295	0.845855	0.462	0.208	8.10502e-291	Intermediate_Epithelial_0dpa_vs_1dpa	DEG
tubb4b	1.7163e-294	-0.652806	0.603	0.824	4.18433e-290	Intermediate_Epithelial_0dpa_vs_1dpa	DEG
bnipl	2.22837e-294	-0.775725	0.433	0.705	5.43278e-290	Intermediate_Epithelial_0dpa_vs_1dpa	DEG
elovl6l	2.29046e-294	0.836214	0.343	0.107	5.58415e-290	Intermediate_Epithelial_0dpa_vs_1dpa	DEG
rsad2	5.89217e-294	-1.36514	0.039	0.281	1.43651e-289	Intermediate_Epithelial_0dpa_vs_1dpa	DEG
fosab	2.0918e-293	1.55473	0.794	0.623	5.09982e-289	Intermediate_Epithelial_0dpa_vs_1dpa	DEG
lnx1	2.849e-293	1.08636	0.743	0.618	6.94585e-289	Intermediate_Epithelial_0dpa_vs_1dpa	DEG
myofl	3.72572e-293	-0.857888	0.199	0.482	9.08331e-289	Intermediate_Epithelial_0dpa_vs_1dpa	DEG
ascl1b	5.29246e-293	-0.810089	0.147	0.427	1.2903e-288	Intermediate_Epithelial_0dpa_vs_1dpa	DEG
hmox1a	5.35115e-293	-1.22326	0.059	0.307	1.30461e-288	Intermediate_Epithelial_0dpa_vs_1dpa	DEG
grb7	5.49689e-292	0.972605	0.669	0.457	1.34014e-287	Intermediate_Epithelial_0dpa_vs_1dpa	DEG
smtnb	6.10313e-292	-0.695198	0.012	0.23	1.48794e-287	Intermediate_Epithelial_0dpa_vs_1dpa	DEG
si:dkey-183i3.5	1.23096e-291	0.466877	0.128	0	3.00108e-287	Intermediate_Epithelial_0dpa_vs_1dpa	DEG
ctsh	1.65823e-290	-0.80619	0.051	0.296	4.04276e-286	Intermediate_Epithelial_0dpa_vs_1dpa	DEG
anxa5b	3.65957e-290	-0.758291	0.273	0.567	8.92203e-286	Intermediate_Epithelial_0dpa_vs_1dpa	DEG
si:dkey-151g10.6	1.01471e-288	0.625695	0.95	0.933	2.47387e-284	Intermediate_Epithelial_0dpa_vs_1dpa	DEG
CABZ01072532.1	1.24965e-288	1.0205	0.68	0.453	3.04666e-284	Intermediate_Epithelial_0dpa_vs_1dpa	DEG
dnajb11	9.87453e-288	-0.765282	0.135	0.411	2.40741e-283	Intermediate_Epithelial_0dpa_vs_1dpa	DEG
aoc2	1.53056e-287	0.479897	0.147	0.006	3.73151e-283	Intermediate_Epithelial_0dpa_vs_1dpa	DEG
krt1-19d	1.71001e-286	0.855881	0.289	0.074	4.169e-282	Intermediate_Epithelial_0dpa_vs_1dpa	DEG
s1pr5a	2.74055e-284	-0.694137	0.008	0.218	6.68147e-280	Intermediate_Epithelial_0dpa_vs_1dpa	DEG
zgc:162944	2.08925e-283	-0.793898	0.231	0.515	5.09359e-279	Intermediate_Epithelial_0dpa_vs_1dpa	DEG
foxn3	4.50597e-281	1.13931	0.838	0.793	1.09856e-276	Intermediate_Epithelial_0dpa_vs_1dpa	DEG
stat1b	4.12304e-280	-0.736627	0.221	0.518	1.0052e-275	Intermediate_Epithelial_0dpa_vs_1dpa	DEG
peli3	5.20162e-280	0.730039	0.285	0.075	1.26815e-275	Intermediate_Epithelial_0dpa_vs_1dpa	DEG
htra1b	4.49344e-279	-0.854024	0.042	0.273	1.0955e-274	Intermediate_Epithelial_0dpa_vs_1dpa	DEG
insra	9.4612e-279	-0.863717	0.216	0.491	2.30664e-274	Intermediate_Epithelial_0dpa_vs_1dpa	DEG
epha4a	8.52775e-278	-0.708955	0.139	0.422	2.07907e-273	Intermediate_Epithelial_0dpa_vs_1dpa	DEG
wnk4b	1.7119e-277	0.706723	0.209	0.034	4.17362e-273	Intermediate_Epithelial_0dpa_vs_1dpa	DEG
RTKN	3.76456e-277	-0.81267	0.041	0.271	9.17799e-273	Intermediate_Epithelial_0dpa_vs_1dpa	DEG
egr2a	3.08088e-276	0.603014	0.176	0.019	7.51118e-272	Intermediate_Epithelial_0dpa_vs_1dpa	DEG
sema4ab	3.74906e-276	-0.941171	0.306	0.566	9.1402e-272	Intermediate_Epithelial_0dpa_vs_1dpa	DEG
rbms1b	1.68785e-275	0.914879	0.681	0.501	4.11497e-271	Intermediate_Epithelial_0dpa_vs_1dpa	DEG
vgll4l	9.32317e-275	-0.66643	0.555	0.797	2.27299e-270	Intermediate_Epithelial_0dpa_vs_1dpa	DEG
cd63	3.53139e-274	-0.601996	0.662	0.883	8.60954e-270	Intermediate_Epithelial_0dpa_vs_1dpa	DEG
krt15	2.51757e-272	1.80842	0.829	0.681	6.13783e-268	Intermediate_Epithelial_0dpa_vs_1dpa	DEG
mical2b	1.03497e-271	0.938262	0.226	0.045	2.52326e-267	Intermediate_Epithelial_0dpa_vs_1dpa	DEG
psmd1	1.33868e-271	-0.740749	0.214	0.493	3.26369e-267	Intermediate_Epithelial_0dpa_vs_1dpa	DEG
BX465862.4	8.52681e-271	0.775386	0.339	0.115	2.07884e-266	Intermediate_Epithelial_0dpa_vs_1dpa	DEG
fas	3.23775e-270	-0.736006	0.09	0.345	7.89365e-266	Intermediate_Epithelial_0dpa_vs_1dpa	DEG
cd82b	2.06424e-268	-0.743277	0.515	0.745	5.03263e-264	Intermediate_Epithelial_0dpa_vs_1dpa	DEG
ank3a	1.6711e-267	0.866299	0.23	0.047	4.07414e-263	Intermediate_Epithelial_0dpa_vs_1dpa	DEG
myb	2.49792e-267	-0.824344	0.357	0.621	6.08994e-263	Intermediate_Epithelial_0dpa_vs_1dpa	DEG
gstp1	2.55346e-267	-0.790466	0.245	0.519	6.22534e-263	Intermediate_Epithelial_0dpa_vs_1dpa	DEG
sh3bp5la	1.2587e-266	0.783934	0.363	0.136	3.06871e-262	Intermediate_Epithelial_0dpa_vs_1dpa	DEG
itgb3b	5.91215e-266	-0.723815	0.177	0.456	1.44138e-261	Intermediate_Epithelial_0dpa_vs_1dpa	DEG
lgals17	7.53287e-265	-0.780703	0.027	0.241	1.83651e-260	Intermediate_Epithelial_0dpa_vs_1dpa	DEG
abracl	2.87975e-264	-0.716178	0.157	0.425	7.02084e-260	Intermediate_Epithelial_0dpa_vs_1dpa	DEG
npc1	5.38413e-264	-0.669285	0.519	0.762	1.31265e-259	Intermediate_Epithelial_0dpa_vs_1dpa	DEG
paqr5b	1.56147e-263	1.21285	0.355	0.131	3.80687e-259	Intermediate_Epithelial_0dpa_vs_1dpa	DEG
pkp1b	1.70742e-263	-0.412127	0.878	0.985	4.1627e-259	Intermediate_Epithelial_0dpa_vs_1dpa	DEG
slc16a1b	2.10862e-263	-0.732974	0.246	0.522	5.14081e-259	Intermediate_Epithelial_0dpa_vs_1dpa	DEG
mark2b	1.16875e-262	0.655469	0.868	0.791	2.84942e-258	Intermediate_Epithelial_0dpa_vs_1dpa	DEG
si:dkey-16l2.20	1.22942e-262	0.794779	0.785	0.667	2.99733e-258	Intermediate_Epithelial_0dpa_vs_1dpa	DEG
fhod1	7.81325e-262	0.908542	0.448	0.208	1.90487e-257	Intermediate_Epithelial_0dpa_vs_1dpa	DEG
krt96	8.47193e-262	-0.821532	0.205	0.492	2.06546e-257	Intermediate_Epithelial_0dpa_vs_1dpa	DEG
niban1a	8.66704e-262	0.748256	0.187	0.027	2.11302e-257	Intermediate_Epithelial_0dpa_vs_1dpa	DEG
si:ch211-212k18.7	1.52399e-261	-0.820489	0.256	0.525	3.71549e-257	Intermediate_Epithelial_0dpa_vs_1dpa	DEG
zgc:194839	3.05183e-261	-0.699412	0.068	0.307	7.44035e-257	Intermediate_Epithelial_0dpa_vs_1dpa	DEG
adcy8	4.16795e-261	-0.671298	0.013	0.213	1.01615e-256	Intermediate_Epithelial_0dpa_vs_1dpa	DEG
tuft1a	4.5132e-261	1.25471	0.478	0.247	1.10032e-256	Intermediate_Epithelial_0dpa_vs_1dpa	DEG
gldc	6.86082e-261	0.691895	0.209	0.038	1.67267e-256	Intermediate_Epithelial_0dpa_vs_1dpa	DEG
bbox1	1.24672e-260	0.898016	0.354	0.131	3.03949e-256	Intermediate_Epithelial_0dpa_vs_1dpa	DEG
gna14	1.37353e-259	0.874934	0.243	0.057	3.34866e-255	Intermediate_Epithelial_0dpa_vs_1dpa	DEG
errfi1a	1.92791e-259	0.622927	0.252	0.061	4.70025e-255	Intermediate_Epithelial_0dpa_vs_1dpa	DEG
ccnl1b	5.52105e-259	0.787753	0.566	0.338	1.34603e-254	Intermediate_Epithelial_0dpa_vs_1dpa	DEG
tax1bp1b	7.84983e-259	0.727074	0.766	0.621	1.91379e-254	Intermediate_Epithelial_0dpa_vs_1dpa	DEG
serpinb1l4	8.27224e-258	-0.561416	0.619	0.861	2.01677e-253	Intermediate_Epithelial_0dpa_vs_1dpa	DEG
LECT2	1.41207e-257	-0.829843	0.069	0.305	3.44263e-253	Intermediate_Epithelial_0dpa_vs_1dpa	DEG
tln2a	1.87631e-257	-0.58714	0.003	0.19	4.57445e-253	Intermediate_Epithelial_0dpa_vs_1dpa	DEG
txndc5	2.02099e-257	-0.714824	0.128	0.382	4.92718e-253	Intermediate_Epithelial_0dpa_vs_1dpa	DEG
sparc	2.57441e-257	-0.937039	0.094	0.336	6.27642e-253	Intermediate_Epithelial_0dpa_vs_1dpa	DEG
ogfrl2	2.81053e-257	-1.19809	0.147	0.402	6.85207e-253	Intermediate_Epithelial_0dpa_vs_1dpa	DEG
homer3b	1.51655e-255	-0.795542	0.251	0.517	3.69735e-251	Intermediate_Epithelial_0dpa_vs_1dpa	DEG
itgb6	1.83315e-255	-0.838407	0.246	0.511	4.46923e-251	Intermediate_Epithelial_0dpa_vs_1dpa	DEG
gig2e	2.48314e-255	-0.711971	0.027	0.236	6.05389e-251	Intermediate_Epithelial_0dpa_vs_1dpa	DEG
ago3b	3.36261e-255	0.840608	0.545	0.325	8.19805e-251	Intermediate_Epithelial_0dpa_vs_1dpa	DEG
si:ch211-232i5.1	2.18432e-254	0.903928	0.276	0.078	5.32537e-250	Intermediate_Epithelial_0dpa_vs_1dpa	DEG
mxa	8.25139e-254	-0.808589	0.15	0.403	2.01169e-249	Intermediate_Epithelial_0dpa_vs_1dpa	DEG
ppdpfb	1.0845e-253	-0.774095	0.19	0.453	2.64402e-249	Intermediate_Epithelial_0dpa_vs_1dpa	DEG
nocta	2.91655e-253	0.89509	0.601	0.395	7.11056e-249	Intermediate_Epithelial_0dpa_vs_1dpa	DEG
gpc1b	4.79181e-253	-0.796388	0.072	0.305	1.16824e-248	Intermediate_Epithelial_0dpa_vs_1dpa	DEG
cebpb	6.83325e-253	0.751534	0.883	0.794	1.66595e-248	Intermediate_Epithelial_0dpa_vs_1dpa	DEG
si:dkey-247k7.2	3.02627e-252	0.855162	0.583	0.343	7.37804e-248	Intermediate_Epithelial_0dpa_vs_1dpa	DEG
arrdc2	3.36139e-252	-0.928919	0.126	0.373	8.19507e-248	Intermediate_Epithelial_0dpa_vs_1dpa	DEG
si:ch211-195b11.3	4.29582e-252	-0.679807	0.643	0.847	1.04732e-247	Intermediate_Epithelial_0dpa_vs_1dpa	DEG
SLC35G1	1.24702e-251	0.633762	0.274	0.076	3.04024e-247	Intermediate_Epithelial_0dpa_vs_1dpa	DEG
hyou1	2.17644e-251	-0.756608	0.203	0.467	5.30615e-247	Intermediate_Epithelial_0dpa_vs_1dpa	DEG
myo9ab	2.54432e-251	-0.590783	0.017	0.214	6.20306e-247	Intermediate_Epithelial_0dpa_vs_1dpa	DEG
mhc1zba	2.7499e-251	0.430182	0.982	0.983	6.70425e-247	Intermediate_Epithelial_0dpa_vs_1dpa	DEG
upk3b	2.80992e-251	0.853901	0.441	0.202	6.8506e-247	Intermediate_Epithelial_0dpa_vs_1dpa	DEG
CABZ01056843.1	1.12811e-250	0.67419	0.209	0.04	2.75034e-246	Intermediate_Epithelial_0dpa_vs_1dpa	DEG
evi5b	1.24948e-250	1.03722	0.532	0.32	3.04624e-246	Intermediate_Epithelial_0dpa_vs_1dpa	DEG
cicb	2.23323e-250	1.00095	0.344	0.13	5.44462e-246	Intermediate_Epithelial_0dpa_vs_1dpa	DEG
baiap2l1a	1.09757e-249	0.952334	0.638	0.424	2.67588e-245	Intermediate_Epithelial_0dpa_vs_1dpa	DEG
ngef	2.56103e-249	0.843041	0.705	0.546	6.2438e-245	Intermediate_Epithelial_0dpa_vs_1dpa	DEG
tshz1	1.7755e-248	0.955594	0.401	0.178	4.32867e-244	Intermediate_Epithelial_0dpa_vs_1dpa	DEG
psmb6	2.54963e-248	-0.691132	0.112	0.356	6.21601e-244	Intermediate_Epithelial_0dpa_vs_1dpa	DEG
tmed10	4.00226e-248	-0.661739	0.412	0.666	9.75751e-244	Intermediate_Epithelial_0dpa_vs_1dpa	DEG
inka1a	4.53265e-247	-0.75835	0.078	0.31	1.10506e-242	Intermediate_Epithelial_0dpa_vs_1dpa	DEG
ngfa	4.82599e-247	0.990193	0.393	0.173	1.17658e-242	Intermediate_Epithelial_0dpa_vs_1dpa	DEG
si:ch211-219a4.3	8.72975e-247	-0.775324	0.18	0.438	2.12831e-242	Intermediate_Epithelial_0dpa_vs_1dpa	DEG
pdlim7	2.24422e-246	0.83696	0.769	0.639	5.4714e-242	Intermediate_Epithelial_0dpa_vs_1dpa	DEG
zgc:111983	2.45735e-245	0.91029	0.802	0.619	5.99102e-241	Intermediate_Epithelial_0dpa_vs_1dpa	DEG
nt5c2b	5.15028e-245	-0.779563	0.245	0.507	1.25564e-240	Intermediate_Epithelial_0dpa_vs_1dpa	DEG
abca1a	5.3263e-245	-0.994858	0.194	0.447	1.29855e-240	Intermediate_Epithelial_0dpa_vs_1dpa	DEG
plce1	3.12026e-244	0.882253	0.384	0.162	7.6072e-240	Intermediate_Epithelial_0dpa_vs_1dpa	DEG
rarga	4.16738e-244	0.681743	0.883	0.83	1.01601e-239	Intermediate_Epithelial_0dpa_vs_1dpa	DEG
luzp2	5.60168e-244	0.715305	0.139	0.01	1.36569e-239	Intermediate_Epithelial_0dpa_vs_1dpa	DEG
lzts2b	2.13401e-242	-0.640414	0.025	0.223	5.2027e-238	Intermediate_Epithelial_0dpa_vs_1dpa	DEG
ptbp1b	2.95521e-241	-0.717316	0.337	0.597	7.2048e-237	Intermediate_Epithelial_0dpa_vs_1dpa	DEG
stard14	7.04391e-241	1.10226	0.542	0.325	1.71731e-236	Intermediate_Epithelial_0dpa_vs_1dpa	DEG
twsg1a	2.38763e-240	-0.633158	0.057	0.275	5.82104e-236	Intermediate_Epithelial_0dpa_vs_1dpa	DEG
arpc3	2.65347e-240	-0.691707	0.225	0.488	6.46917e-236	Intermediate_Epithelial_0dpa_vs_1dpa	DEG
dlgap4b	2.89869e-240	-0.668441	0.191	0.457	7.06699e-236	Intermediate_Epithelial_0dpa_vs_1dpa	DEG
ptrh2	3.57432e-240	-0.560916	0.021	0.216	8.7142e-236	Intermediate_Epithelial_0dpa_vs_1dpa	DEG
itsn2b	4.20406e-240	0.904064	0.624	0.44	1.02495e-235	Intermediate_Epithelial_0dpa_vs_1dpa	DEG
col12a1a	6.98135e-240	-1.04504	0.052	0.264	1.70205e-235	Intermediate_Epithelial_0dpa_vs_1dpa	DEG
grhl1	2.53468e-239	-0.786792	0.308	0.566	6.17955e-235	Intermediate_Epithelial_0dpa_vs_1dpa	DEG
b2m	5.23824e-239	-0.433906	0.978	0.996	1.27708e-234	Intermediate_Epithelial_0dpa_vs_1dpa	DEG
ddx3xa	1.93442e-238	0.746895	0.613	0.413	4.71611e-234	Intermediate_Epithelial_0dpa_vs_1dpa	DEG
tprn	9.85301e-238	0.673536	0.211	0.044	2.40216e-233	Intermediate_Epithelial_0dpa_vs_1dpa	DEG
CR848791.3	1.13456e-237	-0.694584	0.001	0.174	2.76605e-233	Intermediate_Epithelial_0dpa_vs_1dpa	DEG
LO017845.1	1.21848e-237	-0.536147	0.004	0.18	2.97066e-233	Intermediate_Epithelial_0dpa_vs_1dpa	DEG
tnfrsf19	6.22009e-237	-0.685462	0.04	0.245	1.51646e-232	Intermediate_Epithelial_0dpa_vs_1dpa	DEG
BX323575.1	1.07929e-236	-0.695512	0.131	0.376	2.6313e-232	Intermediate_Epithelial_0dpa_vs_1dpa	DEG
RALGDS	1.31554e-236	-0.717265	0.245	0.514	3.20729e-232	Intermediate_Epithelial_0dpa_vs_1dpa	DEG
nop53	1.7169e-236	0.658964	0.32	0.113	4.1858e-232	Intermediate_Epithelial_0dpa_vs_1dpa	DEG
ccser1	4.83386e-236	0.847117	0.403	0.181	1.17849e-231	Intermediate_Epithelial_0dpa_vs_1dpa	DEG
nbeal2	5.76269e-236	0.854796	0.519	0.293	1.40494e-231	Intermediate_Epithelial_0dpa_vs_1dpa	DEG
mhc2dab	1.75488e-235	0.919735	0.679	0.46	4.2784e-231	Intermediate_Epithelial_0dpa_vs_1dpa	DEG
reps2	2.81414e-235	-0.532682	0.005	0.181	6.86089e-231	Intermediate_Epithelial_0dpa_vs_1dpa	DEG
fzd10	9.94337e-235	-0.7164	0.157	0.404	2.42419e-230	Intermediate_Epithelial_0dpa_vs_1dpa	DEG
creb5b	9.96473e-235	1.00351	0.282	0.088	2.4294e-230	Intermediate_Epithelial_0dpa_vs_1dpa	DEG
si:dkey-7j14.6	2.99694e-234	-0.646703	0.427	0.677	7.30654e-230	Intermediate_Epithelial_0dpa_vs_1dpa	DEG
rpl36a	3.20161e-234	0.600599	0.912	0.87	7.80552e-230	Intermediate_Epithelial_0dpa_vs_1dpa	DEG
fam83fa	4.79284e-234	0.820604	0.597	0.388	1.16849e-229	Intermediate_Epithelial_0dpa_vs_1dpa	DEG
fth1a	2.03687e-233	-0.546302	0.78	0.908	4.96589e-229	Intermediate_Epithelial_0dpa_vs_1dpa	DEG
bag5	2.20537e-233	-0.662574	0.048	0.257	5.3767e-229	Intermediate_Epithelial_0dpa_vs_1dpa	DEG
erbb3b	5.10542e-233	0.853316	0.514	0.301	1.2447e-228	Intermediate_Epithelial_0dpa_vs_1dpa	DEG
bach2b	8.69828e-233	0.994435	0.539	0.327	2.12064e-228	Intermediate_Epithelial_0dpa_vs_1dpa	DEG
si:dkey-7c18.24	1.14525e-232	0.874905	0.342	0.133	2.79213e-228	Intermediate_Epithelial_0dpa_vs_1dpa	DEG
shroom1	3.48276e-232	0.793007	0.49	0.266	8.49096e-228	Intermediate_Epithelial_0dpa_vs_1dpa	DEG
fosb	4.44696e-231	1.50888	0.68	0.525	1.08417e-226	Intermediate_Epithelial_0dpa_vs_1dpa	DEG
specc1	5.78446e-231	1.69219	0.333	0.137	1.41025e-226	Intermediate_Epithelial_0dpa_vs_1dpa	DEG
s100z	6.07641e-231	-0.755149	0.148	0.392	1.48143e-226	Intermediate_Epithelial_0dpa_vs_1dpa	DEG
scarb2a	6.63882e-230	0.623949	0.144	0.015	1.61854e-225	Intermediate_Epithelial_0dpa_vs_1dpa	DEG
htr2cl1	2.73651e-229	0.806817	0.334	0.124	6.67162e-225	Intermediate_Epithelial_0dpa_vs_1dpa	DEG
tagapa	5.19893e-229	0.541969	0.208	0.044	1.2675e-224	Intermediate_Epithelial_0dpa_vs_1dpa	DEG
LO017965.1	1.08875e-228	0.789357	0.406	0.186	2.65436e-224	Intermediate_Epithelial_0dpa_vs_1dpa	DEG
ell2	1.35027e-228	-0.58697	0.047	0.253	3.29195e-224	Intermediate_Epithelial_0dpa_vs_1dpa	DEG
zmynd19	1.47683e-228	0.757873	0.373	0.159	3.60052e-224	Intermediate_Epithelial_0dpa_vs_1dpa	DEG
porb	3.63692e-228	0.878827	0.518	0.311	8.86682e-224	Intermediate_Epithelial_0dpa_vs_1dpa	DEG
ndrg1a	4.85535e-228	-0.628162	0.014	0.194	1.18374e-223	Intermediate_Epithelial_0dpa_vs_1dpa	DEG
ftr83	1.825e-227	0.967862	0.509	0.299	4.44935e-223	Intermediate_Epithelial_0dpa_vs_1dpa	DEG
myh9a	1.04727e-226	-0.796635	0.325	0.563	2.55326e-222	Intermediate_Epithelial_0dpa_vs_1dpa	DEG
chac1	1.07124e-226	0.815655	0.725	0.554	2.61169e-222	Intermediate_Epithelial_0dpa_vs_1dpa	DEG
uba1	1.43416e-226	-0.64702	0.294	0.549	3.49648e-222	Intermediate_Epithelial_0dpa_vs_1dpa	DEG
mamdc2a	1.61544e-226	-0.631295	0.001	0.165	3.93845e-222	Intermediate_Epithelial_0dpa_vs_1dpa	DEG
cpeb4b	1.75196e-226	0.712828	0.755	0.628	4.27128e-222	Intermediate_Epithelial_0dpa_vs_1dpa	DEG
zfyve9a	3.63701e-226	0.953023	0.676	0.527	8.86704e-222	Intermediate_Epithelial_0dpa_vs_1dpa	DEG
ndrg3b	5.10736e-226	0.793554	0.367	0.155	1.24517e-221	Intermediate_Epithelial_0dpa_vs_1dpa	DEG
esrp2	5.56902e-226	-0.696332	0.304	0.557	1.35773e-221	Intermediate_Epithelial_0dpa_vs_1dpa	DEG
mapk14a	9.03092e-226	-0.696463	0.099	0.324	2.20174e-221	Intermediate_Epithelial_0dpa_vs_1dpa	DEG
rps6ka3b	4.0791e-225	-0.808598	0.185	0.433	9.94485e-221	Intermediate_Epithelial_0dpa_vs_1dpa	DEG
pdzd2	4.63167e-225	-0.840926	0.185	0.429	1.1292e-220	Intermediate_Epithelial_0dpa_vs_1dpa	DEG
mat2aa	1.33893e-224	0.874017	0.601	0.396	3.26432e-220	Intermediate_Epithelial_0dpa_vs_1dpa	DEG
postnb	3.15822e-224	-0.841895	0.051	0.254	7.69974e-220	Intermediate_Epithelial_0dpa_vs_1dpa	DEG
stx5a	3.64534e-224	0.704257	0.46	0.237	8.88735e-220	Intermediate_Epithelial_0dpa_vs_1dpa	DEG
krtcap2	5.65309e-224	-0.653375	0.109	0.339	1.37822e-219	Intermediate_Epithelial_0dpa_vs_1dpa	DEG
rps28	7.68306e-224	0.623483	0.859	0.79	1.87313e-219	Intermediate_Epithelial_0dpa_vs_1dpa	DEG
nav3	8.59136e-224	0.970174	0.512	0.292	2.09457e-219	Intermediate_Epithelial_0dpa_vs_1dpa	DEG
slc1a5	2.35539e-223	0.773853	0.609	0.412	5.74245e-219	Intermediate_Epithelial_0dpa_vs_1dpa	DEG
kif26ab	1.00442e-222	0.779911	0.735	0.563	2.44878e-218	Intermediate_Epithelial_0dpa_vs_1dpa	DEG
zgc:92242	1.60097e-222	0.844126	0.826	0.745	3.90317e-218	Intermediate_Epithelial_0dpa_vs_1dpa	DEG
msi2b	1.94973e-221	0.941866	0.516	0.309	4.75345e-217	Intermediate_Epithelial_0dpa_vs_1dpa	DEG
mbd2	3.93392e-221	0.721389	0.713	0.567	9.5909e-217	Intermediate_Epithelial_0dpa_vs_1dpa	DEG
CU693379.1	5.0234e-221	0.786324	0.248	0.071	1.22471e-216	Intermediate_Epithelial_0dpa_vs_1dpa	DEG
smap1	1.20776e-220	0.575728	0.883	0.832	2.94453e-216	Intermediate_Epithelial_0dpa_vs_1dpa	DEG
psmd12	1.3343e-220	-0.636278	0.097	0.32	3.25303e-216	Intermediate_Epithelial_0dpa_vs_1dpa	DEG
tead3a	1.62235e-220	-0.694631	0.109	0.335	3.95529e-216	Intermediate_Epithelial_0dpa_vs_1dpa	DEG
fnip1	2.58659e-220	0.753482	0.58	0.387	6.3061e-216	Intermediate_Epithelial_0dpa_vs_1dpa	DEG
spag1a	4.33188e-220	0.796124	0.659	0.492	1.05611e-215	Intermediate_Epithelial_0dpa_vs_1dpa	DEG
FQ311924.2	4.54675e-220	-0.588973	0.014	0.188	1.1085e-215	Intermediate_Epithelial_0dpa_vs_1dpa	DEG
ivns1abpa	8.1936e-220	0.713327	0.355	0.148	1.9976e-215	Intermediate_Epithelial_0dpa_vs_1dpa	DEG
ier5	8.53994e-220	0.731646	0.665	0.485	2.08204e-215	Intermediate_Epithelial_0dpa_vs_1dpa	DEG
spcs1	9.14495e-220	-0.650047	0.173	0.416	2.22954e-215	Intermediate_Epithelial_0dpa_vs_1dpa	DEG
ddx21	1.07558e-219	0.683981	0.38	0.167	2.62227e-215	Intermediate_Epithelial_0dpa_vs_1dpa	DEG
ppp2r5a	2.12652e-219	0.583086	0.177	0.031	5.18445e-215	Intermediate_Epithelial_0dpa_vs_1dpa	DEG
ier2a	3.08861e-219	0.738614	0.591	0.377	7.53004e-215	Intermediate_Epithelial_0dpa_vs_1dpa	DEG
foxq1a	1.1595e-218	-0.807671	0.129	0.358	2.82687e-214	Intermediate_Epithelial_0dpa_vs_1dpa	DEG
zswim5	1.22952e-218	0.839083	0.668	0.516	2.99757e-214	Intermediate_Epithelial_0dpa_vs_1dpa	DEG
rpl36	2.28321e-218	0.583484	0.881	0.833	5.56646e-214	Intermediate_Epithelial_0dpa_vs_1dpa	DEG
bin2b	4.18311e-218	0.824335	0.598	0.403	1.01984e-213	Intermediate_Epithelial_0dpa_vs_1dpa	DEG
nucb1	1.86313e-217	-0.661986	0.242	0.486	4.54231e-213	Intermediate_Epithelial_0dpa_vs_1dpa	DEG
b3gnt5a	3.63366e-217	0.850431	0.541	0.339	8.85885e-213	Intermediate_Epithelial_0dpa_vs_1dpa	DEG
cmip	6.31607e-217	0.852056	0.513	0.306	1.53986e-212	Intermediate_Epithelial_0dpa_vs_1dpa	DEG
slc24a3	2.82651e-216	-0.907388	0.14	0.374	6.89104e-212	Intermediate_Epithelial_0dpa_vs_1dpa	DEG
psmc5	5.17152e-216	-0.624082	0.102	0.324	1.26082e-211	Intermediate_Epithelial_0dpa_vs_1dpa	DEG
hopx	2.77773e-215	0.779326	0.415	0.201	6.77211e-211	Intermediate_Epithelial_0dpa_vs_1dpa	DEG
tnfrsf9a	5.50942e-215	-0.865048	0.221	0.474	1.3432e-210	Intermediate_Epithelial_0dpa_vs_1dpa	DEG
s1pr5b	8.20302e-215	-0.552547	0.038	0.228	1.9999e-210	Intermediate_Epithelial_0dpa_vs_1dpa	DEG
CR391940.1	1.82157e-214	0.56326	0.168	0.028	4.44099e-210	Intermediate_Epithelial_0dpa_vs_1dpa	DEG
si:ch73-86n18.1	3.16137e-214	0.495866	0.143	0.017	7.70742e-210	Intermediate_Epithelial_0dpa_vs_1dpa	DEG
impdh2	3.21613e-214	0.602864	0.235	0.064	7.84092e-210	Intermediate_Epithelial_0dpa_vs_1dpa	DEG
creb3l1	4.27773e-214	0.718234	0.209	0.05	1.04291e-209	Intermediate_Epithelial_0dpa_vs_1dpa	DEG
zgc:173443	1.17732e-213	0.652134	0.111	0.005	2.8703e-209	Intermediate_Epithelial_0dpa_vs_1dpa	DEG
ly6m4	5.41016e-213	0.576131	0.115	0.006	1.319e-208	Intermediate_Epithelial_0dpa_vs_1dpa	DEG
zgc:153115	8.17586e-213	0.677328	0.385	0.175	1.99327e-208	Intermediate_Epithelial_0dpa_vs_1dpa	DEG
rpl37.1	3.46919e-212	0.549968	0.923	0.887	8.45789e-208	Intermediate_Epithelial_0dpa_vs_1dpa	DEG
mtss1	7.65717e-212	-0.690705	0.529	0.747	1.86682e-207	Intermediate_Epithelial_0dpa_vs_1dpa	DEG
daam1a	8.44347e-212	0.689544	0.849	0.778	2.05852e-207	Intermediate_Epithelial_0dpa_vs_1dpa	DEG
plekha6	1.10288e-211	0.763191	0.811	0.673	2.68882e-207	Intermediate_Epithelial_0dpa_vs_1dpa	DEG
adka	3.80402e-211	-0.519195	0.429	0.698	9.27421e-207	Intermediate_Epithelial_0dpa_vs_1dpa	DEG
pitpnm3	9.7293e-211	0.706267	0.285	0.098	2.372e-206	Intermediate_Epithelial_0dpa_vs_1dpa	DEG
psme2	2.93469e-210	-0.656804	0.237	0.48	7.15478e-206	Intermediate_Epithelial_0dpa_vs_1dpa	DEG
ostc	3.14135e-210	-0.614528	0.206	0.451	7.65861e-206	Intermediate_Epithelial_0dpa_vs_1dpa	DEG
nt5e	6.43696e-209	0.734522	0.202	0.048	1.56933e-204	Intermediate_Epithelial_0dpa_vs_1dpa	DEG
ctsc	1.67665e-208	-0.689748	0.207	0.444	4.08768e-204	Intermediate_Epithelial_0dpa_vs_1dpa	DEG
ifngr1	5.04599e-208	0.684825	0.514	0.296	1.23021e-203	Intermediate_Epithelial_0dpa_vs_1dpa	DEG
frmd4ba	6.89256e-208	0.988269	0.725	0.64	1.68041e-203	Intermediate_Epithelial_0dpa_vs_1dpa	DEG
iqgap1	7.66126e-208	-0.617152	0.425	0.659	1.86781e-203	Intermediate_Epithelial_0dpa_vs_1dpa	DEG
TXN	2.4406e-207	-0.61422	0.449	0.679	5.95019e-203	Intermediate_Epithelial_0dpa_vs_1dpa	DEG
ube2h	3.46452e-207	-0.604079	0.191	0.437	8.4465e-203	Intermediate_Epithelial_0dpa_vs_1dpa	DEG
nfkbib	3.16988e-206	-0.592378	0.062	0.26	7.72816e-202	Intermediate_Epithelial_0dpa_vs_1dpa	DEG
rpn1	4.86101e-206	-0.6372	0.177	0.41	1.18511e-201	Intermediate_Epithelial_0dpa_vs_1dpa	DEG
tgm8	5.36287e-206	-0.551176	0.042	0.23	1.30747e-201	Intermediate_Epithelial_0dpa_vs_1dpa	DEG
BX571715.1	9.98596e-206	-0.623917	0.106	0.323	2.43458e-201	Intermediate_Epithelial_0dpa_vs_1dpa	DEG
si:ch211-232i5.3	2.67203e-205	0.658439	0.181	0.037	6.5144e-201	Intermediate_Epithelial_0dpa_vs_1dpa	DEG
ctnna1	5.79358e-205	0.436043	0.964	0.949	1.41247e-200	Intermediate_Epithelial_0dpa_vs_1dpa	DEG
adam8b	7.48922e-205	1.04292	0.654	0.545	1.82587e-200	Intermediate_Epithelial_0dpa_vs_1dpa	DEG
camk2d1	9.43659e-205	0.789366	0.307	0.119	2.30064e-200	Intermediate_Epithelial_0dpa_vs_1dpa	DEG
prrg2	1.09696e-204	-0.631159	0.25	0.493	2.67439e-200	Intermediate_Epithelial_0dpa_vs_1dpa	DEG
march8	1.23569e-204	0.778916	0.631	0.457	3.01261e-200	Intermediate_Epithelial_0dpa_vs_1dpa	DEG
rap1gap2a	2.2572e-204	-0.692492	0.117	0.337	5.50305e-200	Intermediate_Epithelial_0dpa_vs_1dpa	DEG
mov10b.1	3.7311e-204	-0.674665	0.094	0.303	9.09643e-200	Intermediate_Epithelial_0dpa_vs_1dpa	DEG
si:ch1073-303k11.2	2.33573e-203	-0.655202	0.159	0.389	5.69452e-199	Intermediate_Epithelial_0dpa_vs_1dpa	DEG
ybx1	3.43632e-203	0.52654	0.881	0.833	8.37776e-199	Intermediate_Epithelial_0dpa_vs_1dpa	DEG
si:ch211-157c3.4	4.59199e-203	0.868843	0.698	0.561	1.11953e-198	Intermediate_Epithelial_0dpa_vs_1dpa	DEG
PKN2	2.53575e-202	-0.609447	0.372	0.622	6.18216e-198	Intermediate_Epithelial_0dpa_vs_1dpa	DEG
nfkb2	3.13926e-202	-0.636664	0.065	0.264	7.65352e-198	Intermediate_Epithelial_0dpa_vs_1dpa	DEG
tgfbr2b	6.11001e-202	0.541939	0.188	0.041	1.48962e-197	Intermediate_Epithelial_0dpa_vs_1dpa	DEG
bcl2l10	1.25089e-201	-0.639848	0.156	0.383	3.04967e-197	Intermediate_Epithelial_0dpa_vs_1dpa	DEG
myo10	2.88571e-201	0.807897	0.688	0.536	7.03536e-197	Intermediate_Epithelial_0dpa_vs_1dpa	DEG
zmp:0000000912	8.75906e-201	-0.580118	0.031	0.206	2.13546e-196	Intermediate_Epithelial_0dpa_vs_1dpa	DEG
hif1ab	2.4852e-200	-0.620019	0.374	0.603	6.05893e-196	Intermediate_Epithelial_0dpa_vs_1dpa	DEG
tap1	4.13709e-200	-0.674977	0.16	0.388	1.00862e-195	Intermediate_Epithelial_0dpa_vs_1dpa	DEG
si:dkeyp-9d4.2	9.45129e-200	-0.575438	0.016	0.179	2.30422e-195	Intermediate_Epithelial_0dpa_vs_1dpa	DEG
lgmn	1.85224e-199	-0.691796	0.209	0.444	4.51575e-195	Intermediate_Epithelial_0dpa_vs_1dpa	DEG
map7d1a	5.25422e-199	-0.642105	0.212	0.447	1.28098e-194	Intermediate_Epithelial_0dpa_vs_1dpa	DEG
ankrd11	5.68234e-199	0.679371	0.708	0.561	1.38535e-194	Intermediate_Epithelial_0dpa_vs_1dpa	DEG
gipc2	7.13035e-199	0.657545	0.785	0.674	1.73838e-194	Intermediate_Epithelial_0dpa_vs_1dpa	DEG
ino80e.1	1.50489e-198	-0.62704	0.302	0.543	3.66892e-194	Intermediate_Epithelial_0dpa_vs_1dpa	DEG
malt3	1.72461e-198	0.484484	0.164	0.03	4.2046e-194	Intermediate_Epithelial_0dpa_vs_1dpa	DEG
epha7	7.28583e-198	-0.292834	0.621	0.854	1.77628e-193	Intermediate_Epithelial_0dpa_vs_1dpa	DEG
slc7a5	1.65758e-197	0.609893	0.201	0.05	4.04118e-193	Intermediate_Epithelial_0dpa_vs_1dpa	DEG
socs3a	1.82403e-197	1.05781	0.354	0.161	4.44698e-193	Intermediate_Epithelial_0dpa_vs_1dpa	DEG
tuba8l4	2.82105e-197	-0.613977	0.583	0.778	6.87772e-193	Intermediate_Epithelial_0dpa_vs_1dpa	DEG
calm3b	3.14944e-197	-0.61696	0.299	0.536	7.67833e-193	Intermediate_Epithelial_0dpa_vs_1dpa	DEG
wu:fj29h11	1.2511e-196	-0.840533	0.401	0.603	3.05018e-192	Intermediate_Epithelial_0dpa_vs_1dpa	DEG
pkz	1.54088e-196	-0.581562	0.051	0.238	3.75666e-192	Intermediate_Epithelial_0dpa_vs_1dpa	DEG
afdna	2.15453e-196	0.585738	0.88	0.834	5.25275e-192	Intermediate_Epithelial_0dpa_vs_1dpa	DEG
slc12a8	4.88909e-196	0.477104	0.135	0.017	1.19196e-191	Intermediate_Epithelial_0dpa_vs_1dpa	DEG
sik1	5.19762e-196	0.83532	0.414	0.211	1.26718e-191	Intermediate_Epithelial_0dpa_vs_1dpa	DEG
si:ch73-335l21.1	6.56424e-196	0.452182	0.129	0.015	1.60036e-191	Intermediate_Epithelial_0dpa_vs_1dpa	DEG
crema	6.82748e-196	0.741755	0.47	0.271	1.66454e-191	Intermediate_Epithelial_0dpa_vs_1dpa	DEG
cldni	7.22855e-196	-1.20487	0.248	0.462	1.76232e-191	Intermediate_Epithelial_0dpa_vs_1dpa	DEG
spire1a	1.75359e-195	0.886489	0.525	0.332	4.27525e-191	Intermediate_Epithelial_0dpa_vs_1dpa	DEG
psmd7	2.218e-195	-0.614971	0.136	0.353	5.40749e-191	Intermediate_Epithelial_0dpa_vs_1dpa	DEG
nr3c1	3.05047e-195	-0.675777	0.185	0.411	7.43704e-191	Intermediate_Epithelial_0dpa_vs_1dpa	DEG
cox5ab	2.87398e-194	-0.602056	0.09	0.293	7.00676e-190	Intermediate_Epithelial_0dpa_vs_1dpa	DEG
pycard	5.87688e-194	-0.601204	0.117	0.331	1.43278e-189	Intermediate_Epithelial_0dpa_vs_1dpa	DEG
osbpl2b	2.06495e-193	0.616385	0.264	0.09	5.03435e-189	Intermediate_Epithelial_0dpa_vs_1dpa	DEG
fam214a	2.89858e-193	-0.508945	0.543	0.781	7.06675e-189	Intermediate_Epithelial_0dpa_vs_1dpa	DEG
jak1	3.23805e-193	0.679148	0.733	0.605	7.89438e-189	Intermediate_Epithelial_0dpa_vs_1dpa	DEG
fryl	3.44889e-193	0.592437	0.776	0.662	8.40839e-189	Intermediate_Epithelial_0dpa_vs_1dpa	DEG
CABZ01068358.1	4.54239e-193	0.429073	0.146	0.023	1.10744e-188	Intermediate_Epithelial_0dpa_vs_1dpa	DEG
dpp3	5.92453e-192	-0.529137	0.046	0.225	1.4444e-187	Intermediate_Epithelial_0dpa_vs_1dpa	DEG
rps29	1.71456e-191	0.551093	0.876	0.823	4.18009e-187	Intermediate_Epithelial_0dpa_vs_1dpa	DEG
actr1	2.35333e-191	-0.55059	0.082	0.28	5.73741e-187	Intermediate_Epithelial_0dpa_vs_1dpa	DEG
slc9a3r1a	7.11543e-191	0.530465	0.203	0.052	1.73474e-186	Intermediate_Epithelial_0dpa_vs_1dpa	DEG
psma5	1.49694e-190	-0.579653	0.086	0.286	3.64955e-186	Intermediate_Epithelial_0dpa_vs_1dpa	DEG
sec23b	1.76635e-190	0.787995	0.62	0.454	4.30636e-186	Intermediate_Epithelial_0dpa_vs_1dpa	DEG
slc7a3b	1.00515e-189	0.772416	0.497	0.307	2.45055e-185	Intermediate_Epithelial_0dpa_vs_1dpa	DEG
il13ra1	3.52513e-189	0.672938	0.494	0.288	8.59428e-185	Intermediate_Epithelial_0dpa_vs_1dpa	DEG
jpt1b	7.62021e-189	-0.53504	0.053	0.236	1.85781e-184	Intermediate_Epithelial_0dpa_vs_1dpa	DEG
sec11a	7.67301e-189	-0.590176	0.136	0.349	1.87068e-184	Intermediate_Epithelial_0dpa_vs_1dpa	DEG
ganab	1.20714e-188	-0.559143	0.091	0.29	2.943e-184	Intermediate_Epithelial_0dpa_vs_1dpa	DEG
epsti1	2.00709e-188	-0.679314	0.118	0.325	4.89328e-184	Intermediate_Epithelial_0dpa_vs_1dpa	DEG
si:ch211-152p11.4	2.63627e-188	0.795622	0.363	0.172	6.42723e-184	Intermediate_Epithelial_0dpa_vs_1dpa	DEG
map3k1	2.88107e-188	-0.613701	0.073	0.265	7.02406e-184	Intermediate_Epithelial_0dpa_vs_1dpa	DEG
tcima	3.59591e-188	0.978485	0.279	0.105	8.76684e-184	Intermediate_Epithelial_0dpa_vs_1dpa	DEG
epb41l4a	5.97912e-188	0.632428	0.254	0.086	1.45771e-183	Intermediate_Epithelial_0dpa_vs_1dpa	DEG
psmd8	6.55156e-188	-0.545481	0.064	0.252	1.59727e-183	Intermediate_Epithelial_0dpa_vs_1dpa	DEG
ENSDARG00000035679	1.34783e-187	-0.550185	0.085	0.284	3.28601e-183	Intermediate_Epithelial_0dpa_vs_1dpa	DEG
tbc1d2	5.25839e-187	0.681704	0.377	0.182	1.282e-182	Intermediate_Epithelial_0dpa_vs_1dpa	DEG
gadd45ba	5.28474e-187	0.745283	0.342	0.149	1.28842e-182	Intermediate_Epithelial_0dpa_vs_1dpa	DEG
lima1a	6.58453e-187	1.37579	0.686	0.687	1.60531e-182	Intermediate_Epithelial_0dpa_vs_1dpa	DEG
nfe2l1b	1.04095e-186	-0.599628	0.162	0.379	2.53785e-182	Intermediate_Epithelial_0dpa_vs_1dpa	DEG
runx2b	1.41666e-186	0.594297	0.159	0.03	3.45383e-182	Intermediate_Epithelial_0dpa_vs_1dpa	DEG
tlk1b	4.34468e-186	-0.528676	0.026	0.189	1.05923e-181	Intermediate_Epithelial_0dpa_vs_1dpa	DEG
hsh2d	5.32544e-186	0.340528	0.126	0.015	1.29834e-181	Intermediate_Epithelial_0dpa_vs_1dpa	DEG
macf1a	1.61926e-185	0.748192	0.733	0.624	3.94776e-181	Intermediate_Epithelial_0dpa_vs_1dpa	DEG
ikzf2	1.63562e-185	0.905585	0.468	0.281	3.98765e-181	Intermediate_Epithelial_0dpa_vs_1dpa	DEG
hiat1b	1.84026e-185	0.625573	0.323	0.136	4.48654e-181	Intermediate_Epithelial_0dpa_vs_1dpa	DEG
znf217	2.21443e-185	-0.570402	0.092	0.292	5.39877e-181	Intermediate_Epithelial_0dpa_vs_1dpa	DEG
cadm1a	7.03228e-185	0.811516	0.201	0.054	1.71447e-180	Intermediate_Epithelial_0dpa_vs_1dpa	DEG
ptp4a3b	1.16072e-184	0.760021	0.359	0.166	2.82983e-180	Intermediate_Epithelial_0dpa_vs_1dpa	DEG
fa2h	1.1981e-184	0.847021	0.689	0.574	2.92096e-180	Intermediate_Epithelial_0dpa_vs_1dpa	DEG
cox4i1	2.86465e-184	-0.558865	0.465	0.682	6.98401e-180	Intermediate_Epithelial_0dpa_vs_1dpa	DEG
pik3c2a	2.9322e-184	-0.658663	0.158	0.369	7.1487e-180	Intermediate_Epithelial_0dpa_vs_1dpa	DEG
gpa33a	1.40315e-183	-0.519941	0.614	0.791	3.42089e-179	Intermediate_Epithelial_0dpa_vs_1dpa	DEG
CR388047.3	1.55952e-183	0.765327	0.464	0.252	3.80211e-179	Intermediate_Epithelial_0dpa_vs_1dpa	DEG
zgc:162184	4.21624e-183	0.515337	0.195	0.05	1.02792e-178	Intermediate_Epithelial_0dpa_vs_1dpa	DEG
rhof	4.29941e-183	0.783168	0.341	0.153	1.0482e-178	Intermediate_Epithelial_0dpa_vs_1dpa	DEG
mars1	5.45119e-183	0.684001	0.418	0.222	1.329e-178	Intermediate_Epithelial_0dpa_vs_1dpa	DEG
sipa1l1	9.86695e-183	-0.840188	0.116	0.314	2.40556e-178	Intermediate_Epithelial_0dpa_vs_1dpa	DEG
si:ch211-157p22.10	1.2919e-182	0.448781	0.173	0.038	3.14965e-178	Intermediate_Epithelial_0dpa_vs_1dpa	DEG
tfe3a	2.58762e-182	-0.59375	0.104	0.306	6.30861e-178	Intermediate_Epithelial_0dpa_vs_1dpa	DEG
tes	7.32054e-182	-0.561324	0.058	0.238	1.78475e-177	Intermediate_Epithelial_0dpa_vs_1dpa	DEG
slc14a2	2.39023e-181	1.06247	0.124	0.015	5.82739e-177	Intermediate_Epithelial_0dpa_vs_1dpa	DEG
rab13	4.57992e-181	-0.516858	0.065	0.248	1.11658e-176	Intermediate_Epithelial_0dpa_vs_1dpa	DEG
cyb5r1	6.61452e-181	-0.540383	0.082	0.272	1.61262e-176	Intermediate_Epithelial_0dpa_vs_1dpa	DEG
zgc:91890	9.65353e-181	0.604659	0.32	0.135	2.35353e-176	Intermediate_Epithelial_0dpa_vs_1dpa	DEG
samhd1	1.05551e-180	0.375826	0.144	0.024	2.57334e-176	Intermediate_Epithelial_0dpa_vs_1dpa	DEG
FAM83G	1.66221e-180	0.573269	0.877	0.805	4.05247e-176	Intermediate_Epithelial_0dpa_vs_1dpa	DEG
limch1b	3.01953e-180	0.577158	0.189	0.048	7.36162e-176	Intermediate_Epithelial_0dpa_vs_1dpa	DEG
nceh1a	3.283e-180	0.41569	0.152	0.028	8.00395e-176	Intermediate_Epithelial_0dpa_vs_1dpa	DEG
fam43a	6.52909e-180	0.366558	0.141	0.023	1.59179e-175	Intermediate_Epithelial_0dpa_vs_1dpa	DEG
tmcc1b	9.77964e-180	0.790198	0.499	0.311	2.38428e-175	Intermediate_Epithelial_0dpa_vs_1dpa	DEG
psmb2	1.78723e-178	-0.581623	0.143	0.352	4.35727e-174	Intermediate_Epithelial_0dpa_vs_1dpa	DEG
eps8l2	3.26891e-178	0.770498	0.175	0.041	7.96961e-174	Intermediate_Epithelial_0dpa_vs_1dpa	DEG
tnfsf10l	3.64837e-178	-0.645711	0.365	0.584	8.89472e-174	Intermediate_Epithelial_0dpa_vs_1dpa	DEG
znrf2b	4.50356e-178	0.609767	0.254	0.09	1.09797e-173	Intermediate_Epithelial_0dpa_vs_1dpa	DEG
ivns1abpb	5.6629e-178	0.480212	0.225	0.069	1.38062e-173	Intermediate_Epithelial_0dpa_vs_1dpa	DEG
erp44	1.44142e-177	-0.543601	0.102	0.3	3.51419e-173	Intermediate_Epithelial_0dpa_vs_1dpa	DEG
fuca1.1	2.76135e-177	-0.681402	0.119	0.321	6.73217e-173	Intermediate_Epithelial_0dpa_vs_1dpa	DEG
tgif1	2.77003e-177	0.754436	0.545	0.373	6.75334e-173	Intermediate_Epithelial_0dpa_vs_1dpa	DEG
zgc:153867	3.37192e-177	-0.558074	0.421	0.644	8.22074e-173	Intermediate_Epithelial_0dpa_vs_1dpa	DEG
rbx1	3.06483e-176	-0.56648	0.145	0.355	7.47205e-172	Intermediate_Epithelial_0dpa_vs_1dpa	DEG
cers3b	1.02806e-175	-0.560952	0.07	0.252	2.5064e-171	Intermediate_Epithelial_0dpa_vs_1dpa	DEG
selenot2	1.87244e-175	-0.576514	0.231	0.451	4.56502e-171	Intermediate_Epithelial_0dpa_vs_1dpa	DEG
npas2	2.36339e-175	0.622061	0.252	0.09	5.76194e-171	Intermediate_Epithelial_0dpa_vs_1dpa	DEG
si:zfos-943e10.1	3.89264e-175	0.548715	0.195	0.053	9.49026e-171	Intermediate_Epithelial_0dpa_vs_1dpa	DEG
cdc42ep4b	1.18e-174	0.748678	0.701	0.595	2.87685e-170	Intermediate_Epithelial_0dpa_vs_1dpa	DEG
gsk3bb	2.20548e-174	0.630225	0.269	0.102	5.37696e-170	Intermediate_Epithelial_0dpa_vs_1dpa	DEG
FP325130.1	2.21361e-174	-0.526279	0.038	0.199	5.39679e-170	Intermediate_Epithelial_0dpa_vs_1dpa	DEG
lrrc58b	2.39236e-174	0.464559	0.147	0.027	5.83257e-170	Intermediate_Epithelial_0dpa_vs_1dpa	DEG
casp10	6.71827e-174	0.673259	0.3	0.125	1.63791e-169	Intermediate_Epithelial_0dpa_vs_1dpa	DEG
cldne	1.01897e-173	0.985692	0.498	0.295	2.48425e-169	Intermediate_Epithelial_0dpa_vs_1dpa	DEG
slc6a17	1.68204e-173	-0.503648	0.012	0.153	4.10082e-169	Intermediate_Epithelial_0dpa_vs_1dpa	DEG
btbd10b	2.50346e-173	-0.556121	0.287	0.516	6.10344e-169	Intermediate_Epithelial_0dpa_vs_1dpa	DEG
atl3	5.89822e-173	-0.518706	0.488	0.698	1.43799e-168	Intermediate_Epithelial_0dpa_vs_1dpa	DEG
tspan35	1.35223e-172	0.626166	0.606	0.402	3.29674e-168	Intermediate_Epithelial_0dpa_vs_1dpa	DEG
psma8	1.45721e-172	-0.570099	0.141	0.344	3.55268e-168	Intermediate_Epithelial_0dpa_vs_1dpa	DEG
psmc1a	1.84275e-172	-0.514346	0.067	0.244	4.49262e-168	Intermediate_Epithelial_0dpa_vs_1dpa	DEG
mical1	2.15907e-172	-0.587575	0.092	0.28	5.26382e-168	Intermediate_Epithelial_0dpa_vs_1dpa	DEG
zgc:194948	2.41486e-172	-0.479446	0.581	0.79	5.88742e-168	Intermediate_Epithelial_0dpa_vs_1dpa	DEG
sema5a	3.03531e-172	-0.599891	0.008	0.144	7.40008e-168	Intermediate_Epithelial_0dpa_vs_1dpa	DEG
ifi35	4.45046e-172	-0.595279	0.186	0.399	1.08502e-167	Intermediate_Epithelial_0dpa_vs_1dpa	DEG
CABZ01020840.1	6.49151e-172	0.912951	0.645	0.511	1.58263e-167	Intermediate_Epithelial_0dpa_vs_1dpa	DEG
nrg1	1.02618e-171	0.764498	0.806	0.74	2.50184e-167	Intermediate_Epithelial_0dpa_vs_1dpa	DEG
gsna	1.73367e-171	-0.53272	0.111	0.307	4.22669e-167	Intermediate_Epithelial_0dpa_vs_1dpa	DEG
ppp1r15b	2.48776e-171	0.569516	0.184	0.048	6.06515e-167	Intermediate_Epithelial_0dpa_vs_1dpa	DEG
fxyd6l	3.25943e-171	0.631118	0.436	0.243	7.9465e-167	Intermediate_Epithelial_0dpa_vs_1dpa	DEG
cox7a2a	3.42473e-171	-0.587801	0.156	0.362	8.3495e-167	Intermediate_Epithelial_0dpa_vs_1dpa	DEG
cox7b	1.79155e-170	-0.601902	0.251	0.467	4.36781e-166	Intermediate_Epithelial_0dpa_vs_1dpa	DEG
mfge8b	2.54197e-170	0.729833	0.629	0.486	6.19732e-166	Intermediate_Epithelial_0dpa_vs_1dpa	DEG
CU929418.1	3.30202e-170	0.499011	0.208	0.062	8.05032e-166	Intermediate_Epithelial_0dpa_vs_1dpa	DEG
atp5fa1	4.048e-170	-0.564578	0.308	0.529	9.86902e-166	Intermediate_Epithelial_0dpa_vs_1dpa	DEG
tmsb1	7.68118e-170	-0.371514	0.935	0.979	1.87267e-165	Intermediate_Epithelial_0dpa_vs_1dpa	DEG
cavin2b	7.79855e-170	0.687828	0.541	0.359	1.90129e-165	Intermediate_Epithelial_0dpa_vs_1dpa	DEG
ncl	7.90111e-170	0.704621	0.549	0.377	1.92629e-165	Intermediate_Epithelial_0dpa_vs_1dpa	DEG
cd9b	1.99254e-169	-0.42723	0.84	0.95	4.85781e-165	Intermediate_Epithelial_0dpa_vs_1dpa	DEG
cblb	2.77176e-169	-0.651074	0.136	0.334	6.75755e-165	Intermediate_Epithelial_0dpa_vs_1dpa	DEG
irf7	4.91698e-169	-0.658767	0.145	0.346	1.19876e-164	Intermediate_Epithelial_0dpa_vs_1dpa	DEG
cav1	5.53064e-169	0.525076	0.269	0.102	1.34837e-164	Intermediate_Epithelial_0dpa_vs_1dpa	DEG
erbb4b	7.26289e-169	0.660935	0.207	0.061	1.77069e-164	Intermediate_Epithelial_0dpa_vs_1dpa	DEG
cish	7.85366e-169	0.362128	0.12	0.016	1.91472e-164	Intermediate_Epithelial_0dpa_vs_1dpa	DEG
taok1a	8.58882e-169	-0.600455	0.218	0.433	2.09395e-164	Intermediate_Epithelial_0dpa_vs_1dpa	DEG
si:ch73-329n5.1	1.02959e-168	0.519619	0.17	0.04	2.51014e-164	Intermediate_Epithelial_0dpa_vs_1dpa	DEG
lman2lb	1.24327e-168	-0.49938	0.068	0.247	3.0311e-164	Intermediate_Epithelial_0dpa_vs_1dpa	DEG
rab25a	1.31788e-168	-0.551773	0.27	0.495	3.213e-164	Intermediate_Epithelial_0dpa_vs_1dpa	DEG
psmd13	1.82971e-168	-0.51883	0.081	0.264	4.46082e-164	Intermediate_Epithelial_0dpa_vs_1dpa	DEG
edil3a	1.93892e-168	0.487503	0.102	0.009	4.7271e-164	Intermediate_Epithelial_0dpa_vs_1dpa	DEG
si:dkey-102c8.3	3.55254e-168	-0.64725	0.24	0.452	8.66109e-164	Intermediate_Epithelial_0dpa_vs_1dpa	DEG
mboat2a	7.82521e-168	-0.630958	0.475	0.68	1.90779e-163	Intermediate_Epithelial_0dpa_vs_1dpa	DEG
mid1ip1a	8.61335e-168	0.74169	0.462	0.27	2.09993e-163	Intermediate_Epithelial_0dpa_vs_1dpa	DEG
slc27a1b.1	9.88905e-168	0.515509	0.228	0.076	2.41095e-163	Intermediate_Epithelial_0dpa_vs_1dpa	DEG
ubald1a	1.52844e-167	-0.757637	0.087	0.267	3.72634e-163	Intermediate_Epithelial_0dpa_vs_1dpa	DEG
gclc	2.14961e-166	0.702487	0.296	0.128	5.24075e-162	Intermediate_Epithelial_0dpa_vs_1dpa	DEG
uqcr10	2.94216e-166	-0.56904	0.193	0.403	7.17297e-162	Intermediate_Epithelial_0dpa_vs_1dpa	DEG
dhrs13a.2	3.05976e-166	1.08842	0.56	0.394	7.45969e-162	Intermediate_Epithelial_0dpa_vs_1dpa	DEG
icn	3.48844e-166	0.466746	0.996	0.993	8.5048e-162	Intermediate_Epithelial_0dpa_vs_1dpa	DEG
si:dkey-239b22.1	6.24981e-166	0.702098	0.198	0.058	1.5237e-161	Intermediate_Epithelial_0dpa_vs_1dpa	DEG
si:dkey-228d14.5	9.6183e-166	0.655652	0.23	0.077	2.34494e-161	Intermediate_Epithelial_0dpa_vs_1dpa	DEG
tnrc18	1.39789e-165	0.650872	0.455	0.268	3.40806e-161	Intermediate_Epithelial_0dpa_vs_1dpa	DEG
mfn2	3.30744e-165	0.682075	0.423	0.239	8.06353e-161	Intermediate_Epithelial_0dpa_vs_1dpa	DEG
pls3	4.02083e-165	-0.443791	0.615	0.807	9.80278e-161	Intermediate_Epithelial_0dpa_vs_1dpa	DEG
klf5l	7.31512e-165	0.740679	0.541	0.363	1.78343e-160	Intermediate_Epithelial_0dpa_vs_1dpa	DEG
flrt2	7.51296e-165	0.658468	0.179	0.047	1.83166e-160	Intermediate_Epithelial_0dpa_vs_1dpa	DEG
plekho1b	5.00341e-164	-0.422813	0.009	0.142	1.21983e-159	Intermediate_Epithelial_0dpa_vs_1dpa	DEG
ssr4	1.69793e-163	-0.562282	0.215	0.428	4.13954e-159	Intermediate_Epithelial_0dpa_vs_1dpa	DEG
asap3	1.75426e-163	-0.53924	0.481	0.697	4.27689e-159	Intermediate_Epithelial_0dpa_vs_1dpa	DEG
xaf1	5.0251e-163	-0.527437	0.09	0.271	1.22512e-158	Intermediate_Epithelial_0dpa_vs_1dpa	DEG
snx13	1.95932e-162	-0.5743	0.202	0.41	4.77683e-158	Intermediate_Epithelial_0dpa_vs_1dpa	DEG
si:dkey-40g16.6	2.05207e-162	-0.702887	0.057	0.222	5.00294e-158	Intermediate_Epithelial_0dpa_vs_1dpa	DEG
h2az2b	2.21328e-162	-0.5269	0.132	0.331	5.39597e-158	Intermediate_Epithelial_0dpa_vs_1dpa	DEG
hexb	1.17229e-161	-0.604752	0.15	0.346	2.85804e-157	Intermediate_Epithelial_0dpa_vs_1dpa	DEG
tmem131	1.46688e-161	-0.537505	0.504	0.696	3.57625e-157	Intermediate_Epithelial_0dpa_vs_1dpa	DEG
nsa2	1.74188e-161	0.630416	0.405	0.22	4.2467e-157	Intermediate_Epithelial_0dpa_vs_1dpa	DEG
sox7	7.41041e-161	0.491473	0.182	0.049	1.80666e-156	Intermediate_Epithelial_0dpa_vs_1dpa	DEG
lygl1	8.49232e-161	-0.571901	0.213	0.423	2.07043e-156	Intermediate_Epithelial_0dpa_vs_1dpa	DEG
nfia	2.5447e-160	0.577877	0.22	0.074	6.20399e-156	Intermediate_Epithelial_0dpa_vs_1dpa	DEG
klf8	4.57151e-160	1.03098	0.555	0.403	1.11453e-155	Intermediate_Epithelial_0dpa_vs_1dpa	DEG
hmgcra	1.20047e-159	0.401586	0.109	0.013	2.92675e-155	Intermediate_Epithelial_0dpa_vs_1dpa	DEG
MAGI3	1.63008e-159	0.632504	0.599	0.409	3.97414e-155	Intermediate_Epithelial_0dpa_vs_1dpa	DEG
nectin4a	2.52187e-159	-0.373646	0.864	0.952	6.14832e-155	Intermediate_Epithelial_0dpa_vs_1dpa	DEG
macrod2	3.8547e-159	0.479375	0.815	0.701	9.39776e-155	Intermediate_Epithelial_0dpa_vs_1dpa	DEG
ccn1	5.10264e-159	0.739825	0.262	0.103	1.24402e-154	Intermediate_Epithelial_0dpa_vs_1dpa	DEG
rfng	1.04321e-158	-0.471863	0.058	0.222	2.54334e-154	Intermediate_Epithelial_0dpa_vs_1dpa	DEG
slco3a1	1.09896e-158	-0.557315	0.052	0.212	2.67927e-154	Intermediate_Epithelial_0dpa_vs_1dpa	DEG
ppan	1.30803e-158	0.382531	0.144	0.029	3.18898e-154	Intermediate_Epithelial_0dpa_vs_1dpa	DEG
mgst3b	1.38955e-158	-0.535033	0.131	0.323	3.38772e-154	Intermediate_Epithelial_0dpa_vs_1dpa	DEG
DST	1.44186e-158	-0.621249	0.169	0.363	3.51525e-154	Intermediate_Epithelial_0dpa_vs_1dpa	DEG
cad	2.43043e-158	0.602557	0.318	0.147	5.92538e-154	Intermediate_Epithelial_0dpa_vs_1dpa	DEG
sept7a	2.93245e-158	-0.580192	0.437	0.637	7.1493e-154	Intermediate_Epithelial_0dpa_vs_1dpa	DEG
CABZ01062996.1	4.40394e-158	0.582127	0.336	0.16	1.07368e-153	Intermediate_Epithelial_0dpa_vs_1dpa	DEG
si:ch211-207n23.2	4.54982e-158	0.594287	0.431	0.24	1.10925e-153	Intermediate_Epithelial_0dpa_vs_1dpa	DEG
tspan14	1.12838e-157	-0.525607	0.298	0.518	2.75098e-153	Intermediate_Epithelial_0dpa_vs_1dpa	DEG
psmc2	4.5309e-157	-0.493056	0.089	0.267	1.10463e-152	Intermediate_Epithelial_0dpa_vs_1dpa	DEG
zgc:152658	4.5596e-157	-0.546899	0.079	0.251	1.11163e-152	Intermediate_Epithelial_0dpa_vs_1dpa	DEG
slc22a23	5.36744e-157	-0.546994	0.243	0.454	1.30858e-152	Intermediate_Epithelial_0dpa_vs_1dpa	DEG
tcf7l1b	7.91104e-157	0.63834	0.31	0.142	1.92871e-152	Intermediate_Epithelial_0dpa_vs_1dpa	DEG
rpl5b	1.11886e-156	0.596448	0.724	0.63	2.72779e-152	Intermediate_Epithelial_0dpa_vs_1dpa	DEG
CT583625.5	2.4011e-156	-0.500578	0.024	0.165	5.85389e-152	Intermediate_Epithelial_0dpa_vs_1dpa	DEG
bcl3	4.81196e-156	-0.564494	0.027	0.169	1.17316e-151	Intermediate_Epithelial_0dpa_vs_1dpa	DEG
mark3b	5.38279e-156	-0.581597	0.131	0.319	1.31232e-151	Intermediate_Epithelial_0dpa_vs_1dpa	DEG
hsf2	5.88496e-156	-0.536126	0.159	0.357	1.43475e-151	Intermediate_Epithelial_0dpa_vs_1dpa	DEG
ubr4	2.51706e-155	-0.536019	0.352	0.561	6.1366e-151	Intermediate_Epithelial_0dpa_vs_1dpa	DEG
bcam	2.77997e-155	-0.841009	0.018	0.152	6.77756e-151	Intermediate_Epithelial_0dpa_vs_1dpa	DEG
hint1	6.87573e-155	-0.534763	0.11	0.294	1.6763e-150	Intermediate_Epithelial_0dpa_vs_1dpa	DEG
ttc27	1.42521e-154	0.454254	0.166	0.042	3.47466e-150	Intermediate_Epithelial_0dpa_vs_1dpa	DEG
degs2	1.57498e-154	0.845547	0.471	0.294	3.83981e-150	Intermediate_Epithelial_0dpa_vs_1dpa	DEG
tax1bp1a	2.11409e-154	-0.587944	0.084	0.254	5.15416e-150	Intermediate_Epithelial_0dpa_vs_1dpa	DEG
apnl	2.5792e-154	0.587332	0.379	0.195	6.28809e-150	Intermediate_Epithelial_0dpa_vs_1dpa	DEG
il1b	4.42978e-154	-0.746339	0.025	0.166	1.07998e-149	Intermediate_Epithelial_0dpa_vs_1dpa	DEG
calm3a.1	5.31929e-154	-0.425355	0.019	0.153	1.29684e-149	Intermediate_Epithelial_0dpa_vs_1dpa	DEG
man1a1	5.72194e-154	0.64208	0.706	0.604	1.39501e-149	Intermediate_Epithelial_0dpa_vs_1dpa	DEG
itgb4	1.33123e-153	0.84306	0.421	0.232	3.24554e-149	Intermediate_Epithelial_0dpa_vs_1dpa	DEG
pdia4	1.60326e-153	-0.521689	0.094	0.272	3.90875e-149	Intermediate_Epithelial_0dpa_vs_1dpa	DEG
psmd14	5.10599e-153	-0.482396	0.082	0.254	1.24484e-148	Intermediate_Epithelial_0dpa_vs_1dpa	DEG
suco	6.24883e-153	0.672112	0.586	0.434	1.52346e-148	Intermediate_Epithelial_0dpa_vs_1dpa	DEG
rplp2	7.56557e-153	0.45178	0.923	0.908	1.84449e-148	Intermediate_Epithelial_0dpa_vs_1dpa	DEG
agpat9l	9.12519e-153	-0.546712	0.122	0.306	2.22472e-148	Intermediate_Epithelial_0dpa_vs_1dpa	DEG
trim69	1.40266e-152	-0.47401	0.012	0.139	3.41968e-148	Intermediate_Epithelial_0dpa_vs_1dpa	DEG
zgc:77486.1	1.50989e-152	0.538542	0.818	0.774	3.6811e-148	Intermediate_Epithelial_0dpa_vs_1dpa	DEG
ABCA7	2.42886e-152	0.540217	0.204	0.066	5.92155e-148	Intermediate_Epithelial_0dpa_vs_1dpa	DEG
atp2a3	2.63297e-152	-0.576179	0.307	0.511	6.41918e-148	Intermediate_Epithelial_0dpa_vs_1dpa	DEG
si:ch211-285f17.1	3.22627e-152	-0.626963	0.186	0.381	7.86565e-148	Intermediate_Epithelial_0dpa_vs_1dpa	DEG
abhd12	3.33343e-152	-0.57002	0.188	0.386	8.12689e-148	Intermediate_Epithelial_0dpa_vs_1dpa	DEG
skila	3.81187e-152	0.65448	0.425	0.244	9.29335e-148	Intermediate_Epithelial_0dpa_vs_1dpa	DEG
spaca4l	7.1987e-152	-0.290887	0.965	0.993	1.75504e-147	Intermediate_Epithelial_0dpa_vs_1dpa	DEG
f2rl2	1.50915e-151	-0.429903	0.012	0.139	3.67931e-147	Intermediate_Epithelial_0dpa_vs_1dpa	DEG
capza1b	3.73324e-151	-0.528177	0.199	0.399	9.10163e-147	Intermediate_Epithelial_0dpa_vs_1dpa	DEG
hlfa	5.81419e-151	0.590878	0.29	0.128	1.4175e-146	Intermediate_Epithelial_0dpa_vs_1dpa	DEG
plekhf1	8.39745e-151	-0.815418	0.111	0.287	2.0473e-146	Intermediate_Epithelial_0dpa_vs_1dpa	DEG
fmr1	2.21637e-149	-0.552745	0.109	0.287	5.40352e-145	Intermediate_Epithelial_0dpa_vs_1dpa	DEG
atp1a1a.1	3.26426e-149	0.626351	0.648	0.513	7.95826e-145	Intermediate_Epithelial_0dpa_vs_1dpa	DEG
slc16a10	6.96648e-149	0.333013	0.112	0.017	1.69843e-144	Intermediate_Epithelial_0dpa_vs_1dpa	DEG
kidins220a	7.35553e-149	0.637615	0.638	0.494	1.79328e-144	Intermediate_Epithelial_0dpa_vs_1dpa	DEG
chmp1b	1.03913e-148	0.579235	0.712	0.607	2.53339e-144	Intermediate_Epithelial_0dpa_vs_1dpa	DEG
rnaseka	1.06235e-148	-0.545013	0.149	0.338	2.59002e-144	Intermediate_Epithelial_0dpa_vs_1dpa	DEG
si:dkey-238i5.2	3.30764e-148	-0.53168	0.045	0.193	8.06402e-144	Intermediate_Epithelial_0dpa_vs_1dpa	DEG
atrx	5.10227e-148	-0.538578	0.214	0.414	1.24393e-143	Intermediate_Epithelial_0dpa_vs_1dpa	DEG
dbnla	5.44414e-148	0.582409	0.446	0.259	1.32728e-143	Intermediate_Epithelial_0dpa_vs_1dpa	DEG
capza1a	6.59224e-148	-0.510537	0.292	0.501	1.60719e-143	Intermediate_Epithelial_0dpa_vs_1dpa	DEG
CT573344.1	6.8708e-148	0.444105	0.148	0.035	1.6751e-143	Intermediate_Epithelial_0dpa_vs_1dpa	DEG
tmed2	6.89133e-148	-0.483254	0.439	0.646	1.68011e-143	Intermediate_Epithelial_0dpa_vs_1dpa	DEG
slc37a1	2.49857e-147	0.695106	0.401	0.231	6.09151e-143	Intermediate_Epithelial_0dpa_vs_1dpa	DEG
syt4	3.40068e-147	-0.398202	0.008	0.127	8.29085e-143	Intermediate_Epithelial_0dpa_vs_1dpa	DEG
plp2	4.47176e-147	-0.512278	0.195	0.394	1.09021e-142	Intermediate_Epithelial_0dpa_vs_1dpa	DEG
scinlb	1.28862e-146	0.671524	0.621	0.462	3.14165e-142	Intermediate_Epithelial_0dpa_vs_1dpa	DEG
RPL37A	1.37657e-146	0.491686	0.893	0.861	3.35607e-142	Intermediate_Epithelial_0dpa_vs_1dpa	DEG
ank3b	2.42596e-146	0.509756	0.195	0.062	5.9145e-142	Intermediate_Epithelial_0dpa_vs_1dpa	DEG
col17a1b	4.5345e-146	-0.712814	0.18	0.379	1.10551e-141	Intermediate_Epithelial_0dpa_vs_1dpa	DEG
hipk2	6.1202e-146	-0.664823	0.22	0.417	1.4921e-141	Intermediate_Epithelial_0dpa_vs_1dpa	DEG
tubb2b	2.33246e-145	-0.524615	0.162	0.351	5.68653e-141	Intermediate_Epithelial_0dpa_vs_1dpa	DEG
crybg1b	2.89122e-145	-0.510818	0.295	0.502	7.04879e-141	Intermediate_Epithelial_0dpa_vs_1dpa	DEG
BX284696.1	2.90635e-145	0.415641	0.181	0.053	7.08567e-141	Intermediate_Epithelial_0dpa_vs_1dpa	DEG
tmem258	3.62337e-145	-0.516028	0.349	0.553	8.83378e-141	Intermediate_Epithelial_0dpa_vs_1dpa	DEG
jdp2b	4.55768e-145	1.12097	0.456	0.287	1.11116e-140	Intermediate_Epithelial_0dpa_vs_1dpa	DEG
thrap3a	8.63933e-145	0.499783	0.175	0.051	2.10627e-140	Intermediate_Epithelial_0dpa_vs_1dpa	DEG
timp2b	2.14089e-144	-0.824248	0.018	0.145	5.21948e-140	Intermediate_Epithelial_0dpa_vs_1dpa	DEG
srgap3	2.38072e-144	0.519791	0.225	0.082	5.8042e-140	Intermediate_Epithelial_0dpa_vs_1dpa	DEG
atf4b	4.83447e-144	0.51065	0.717	0.605	1.17864e-139	Intermediate_Epithelial_0dpa_vs_1dpa	DEG
arntl2	6.0881e-144	-0.556619	0.161	0.352	1.48428e-139	Intermediate_Epithelial_0dpa_vs_1dpa	DEG
fam171a2a	6.58426e-144	-0.499942	0.053	0.205	1.60524e-139	Intermediate_Epithelial_0dpa_vs_1dpa	DEG
hsbp1b	9.31745e-144	-0.475804	0.08	0.244	2.27159e-139	Intermediate_Epithelial_0dpa_vs_1dpa	DEG
f3a	1.84785e-143	-0.518593	0.283	0.49	4.50505e-139	Intermediate_Epithelial_0dpa_vs_1dpa	DEG
SEMA4F	2.60549e-143	0.664248	0.305	0.14	6.35219e-139	Intermediate_Epithelial_0dpa_vs_1dpa	DEG
si:dkey-188i13.10	3.09976e-143	-0.482895	0.102	0.274	7.55721e-139	Intermediate_Epithelial_0dpa_vs_1dpa	DEG
ndufc2	5.21792e-143	-0.509228	0.155	0.342	1.27213e-138	Intermediate_Epithelial_0dpa_vs_1dpa	DEG
polr1a	5.67871e-143	0.486248	0.229	0.086	1.38447e-138	Intermediate_Epithelial_0dpa_vs_1dpa	DEG
cgna	9.5564e-143	0.692034	0.539	0.382	2.32985e-138	Intermediate_Epithelial_0dpa_vs_1dpa	DEG
mmp14b	1.16254e-142	-0.54189	0.083	0.245	2.83428e-138	Intermediate_Epithelial_0dpa_vs_1dpa	DEG
bcl2l11	2.00038e-142	-0.533299	0.482	0.68	4.87694e-138	Intermediate_Epithelial_0dpa_vs_1dpa	DEG
plekhf2	2.95804e-142	0.640322	0.59	0.444	7.21171e-138	Intermediate_Epithelial_0dpa_vs_1dpa	DEG
jag1b	2.99064e-142	-0.537908	0.679	0.805	7.29118e-138	Intermediate_Epithelial_0dpa_vs_1dpa	DEG
kaznb	4.29273e-142	0.898724	0.541	0.395	1.04657e-137	Intermediate_Epithelial_0dpa_vs_1dpa	DEG
CU179643.1	4.48302e-142	0.575936	0.729	0.608	1.09296e-137	Intermediate_Epithelial_0dpa_vs_1dpa	DEG
ehbp1	6.00405e-142	0.527361	0.27	0.116	1.46379e-137	Intermediate_Epithelial_0dpa_vs_1dpa	DEG
krt17	2.10758e-141	-0.765465	0.145	0.328	5.13827e-137	Intermediate_Epithelial_0dpa_vs_1dpa	DEG
igf2bp2a	3.17937e-141	0.663708	0.142	0.034	7.7513e-137	Intermediate_Epithelial_0dpa_vs_1dpa	DEG
psmc6	1.24659e-140	-0.466914	0.077	0.237	3.0392e-136	Intermediate_Epithelial_0dpa_vs_1dpa	DEG
fam172a	1.31872e-140	0.699257	0.432	0.262	3.21503e-136	Intermediate_Epithelial_0dpa_vs_1dpa	DEG
fkbp2	1.46772e-140	-0.478726	0.086	0.249	3.57831e-136	Intermediate_Epithelial_0dpa_vs_1dpa	DEG
peli1b	3.01869e-140	-0.6086	0.307	0.506	7.35956e-136	Intermediate_Epithelial_0dpa_vs_1dpa	DEG
sox11a	3.94945e-140	-0.547418	0.038	0.176	9.62876e-136	Intermediate_Epithelial_0dpa_vs_1dpa	DEG
si:ch211-203b8.6	8.32912e-140	0.38947	0.171	0.049	2.03064e-135	Intermediate_Epithelial_0dpa_vs_1dpa	DEG
per1b	8.94765e-140	-0.485621	0.356	0.562	2.18144e-135	Intermediate_Epithelial_0dpa_vs_1dpa	DEG
zmp:0000000991	1.20475e-139	0.486824	0.211	0.075	2.93718e-135	Intermediate_Epithelial_0dpa_vs_1dpa	DEG
btf3	3.04466e-139	0.583118	0.628	0.497	7.42289e-135	Intermediate_Epithelial_0dpa_vs_1dpa	DEG
chmp4bb	3.0991e-139	0.597193	0.63	0.488	7.5556e-135	Intermediate_Epithelial_0dpa_vs_1dpa	DEG
numb	3.23623e-139	0.610308	0.468	0.299	7.88993e-135	Intermediate_Epithelial_0dpa_vs_1dpa	DEG
hspg2	3.37858e-139	-0.522523	0.025	0.154	8.23698e-135	Intermediate_Epithelial_0dpa_vs_1dpa	DEG
edem3	6.36823e-139	0.44036	0.193	0.063	1.55257e-134	Intermediate_Epithelial_0dpa_vs_1dpa	DEG
ccl19a.2	7.79789e-139	1.57022	0.149	0.038	1.90113e-134	Intermediate_Epithelial_0dpa_vs_1dpa	DEG
flna	8.0886e-139	-0.630857	0.46	0.643	1.972e-134	Intermediate_Epithelial_0dpa_vs_1dpa	DEG
bzw1a	1.39766e-138	-0.530635	0.223	0.413	3.4075e-134	Intermediate_Epithelial_0dpa_vs_1dpa	DEG
zgc:56525	3.24667e-138	-0.479677	0.138	0.319	7.91538e-134	Intermediate_Epithelial_0dpa_vs_1dpa	DEG
UBB	3.48463e-138	-0.415806	0.819	0.928	8.49552e-134	Intermediate_Epithelial_0dpa_vs_1dpa	DEG
psma2	5.91343e-138	-0.491237	0.113	0.285	1.4417e-133	Intermediate_Epithelial_0dpa_vs_1dpa	DEG
copz2	7.01764e-138	0.479888	0.191	0.063	1.7109e-133	Intermediate_Epithelial_0dpa_vs_1dpa	DEG
SGMS1	7.9717e-138	0.728563	0.74	0.692	1.9435e-133	Intermediate_Epithelial_0dpa_vs_1dpa	DEG
psmb12	8.44095e-137	-0.464618	0.071	0.225	2.0579e-132	Intermediate_Epithelial_0dpa_vs_1dpa	DEG
rgs12a	8.52708e-137	-0.625088	0.169	0.347	2.0789e-132	Intermediate_Epithelial_0dpa_vs_1dpa	DEG
myh9b	1.13171e-136	-0.363851	0.518	0.717	2.7591e-132	Intermediate_Epithelial_0dpa_vs_1dpa	DEG
gpd2	1.26868e-136	0.494802	0.249	0.102	3.09305e-132	Intermediate_Epithelial_0dpa_vs_1dpa	DEG
rpl38	1.82878e-136	0.508206	0.807	0.748	4.45856e-132	Intermediate_Epithelial_0dpa_vs_1dpa	DEG
jund	1.98519e-136	0.732623	0.694	0.586	4.8399e-132	Intermediate_Epithelial_0dpa_vs_1dpa	DEG
soul2	2.39292e-136	0.397383	0.14	0.033	5.83393e-132	Intermediate_Epithelial_0dpa_vs_1dpa	DEG
b4galnt1a	2.42247e-136	-0.578027	0.11	0.276	5.90597e-132	Intermediate_Epithelial_0dpa_vs_1dpa	DEG
raver2	2.71745e-136	0.422057	0.163	0.047	6.62514e-132	Intermediate_Epithelial_0dpa_vs_1dpa	DEG
CABZ01117607.1	3.17811e-136	0.469229	0.203	0.072	7.74824e-132	Intermediate_Epithelial_0dpa_vs_1dpa	DEG
arpc5lb	4.03033e-136	-0.493017	0.207	0.4	9.82594e-132	Intermediate_Epithelial_0dpa_vs_1dpa	DEG
sp6	5.15648e-136	-0.427724	0.052	0.197	1.25715e-131	Intermediate_Epithelial_0dpa_vs_1dpa	DEG
psmc4	8.76117e-136	-0.502478	0.157	0.336	2.13597e-131	Intermediate_Epithelial_0dpa_vs_1dpa	DEG
ywhaba	2.36418e-135	-0.473134	0.467	0.659	5.76388e-131	Intermediate_Epithelial_0dpa_vs_1dpa	DEG
nupr1b	2.36996e-135	-0.408896	0.03	0.16	5.77797e-131	Intermediate_Epithelial_0dpa_vs_1dpa	DEG
si:ch73-46j18.5	4.61497e-135	-0.434321	0.07	0.223	1.12513e-130	Intermediate_Epithelial_0dpa_vs_1dpa	DEG
ice2	4.89644e-135	-0.549967	0.092	0.252	1.19375e-130	Intermediate_Epithelial_0dpa_vs_1dpa	DEG
pcxa	9.03939e-135	0.606789	0.74	0.658	2.2038e-130	Intermediate_Epithelial_0dpa_vs_1dpa	DEG
vclb	1.82483e-134	-0.442732	0.071	0.223	4.44893e-130	Intermediate_Epithelial_0dpa_vs_1dpa	DEG
clcf1	1.97471e-134	0.993992	0.411	0.256	4.81434e-130	Intermediate_Epithelial_0dpa_vs_1dpa	DEG
si:dkey-246i14.3	2.17599e-134	0.721675	0.531	0.38	5.30505e-130	Intermediate_Epithelial_0dpa_vs_1dpa	DEG
snrpe	3.16706e-134	-0.448465	0.065	0.215	7.72128e-130	Intermediate_Epithelial_0dpa_vs_1dpa	DEG
nenf	4.56845e-134	-0.485704	0.277	0.476	1.11379e-129	Intermediate_Epithelial_0dpa_vs_1dpa	DEG
rabgap1l	6.15906e-134	0.704616	0.519	0.372	1.50158e-129	Intermediate_Epithelial_0dpa_vs_1dpa	DEG
atxn1a	8.16821e-134	0.655419	0.658	0.532	1.99141e-129	Intermediate_Epithelial_0dpa_vs_1dpa	DEG
wls	1.09588e-133	-0.523946	0.197	0.379	2.67175e-129	Intermediate_Epithelial_0dpa_vs_1dpa	DEG
ism1	1.11369e-133	0.5572	0.245	0.102	2.71518e-129	Intermediate_Epithelial_0dpa_vs_1dpa	DEG
CU467961.1	1.39286e-133	0.707519	0.753	0.703	3.39579e-129	Intermediate_Epithelial_0dpa_vs_1dpa	DEG
cnp	1.63411e-133	-0.523328	0.14	0.313	3.98395e-129	Intermediate_Epithelial_0dpa_vs_1dpa	DEG
atp5pb	1.75516e-133	-0.497173	0.21	0.396	4.27908e-129	Intermediate_Epithelial_0dpa_vs_1dpa	DEG
cox6b2	4.2691e-133	-0.482159	0.409	0.603	1.04081e-128	Intermediate_Epithelial_0dpa_vs_1dpa	DEG
bcar3	4.75795e-133	0.52513	0.719	0.598	1.15999e-128	Intermediate_Epithelial_0dpa_vs_1dpa	DEG
gig2d	5.23555e-133	-0.419238	0.011	0.124	1.27643e-128	Intermediate_Epithelial_0dpa_vs_1dpa	DEG
gnpnat1	6.78652e-133	0.574007	0.414	0.244	1.65455e-128	Intermediate_Epithelial_0dpa_vs_1dpa	DEG
hbp1	9.95731e-133	-0.460725	0.082	0.238	2.42759e-128	Intermediate_Epithelial_0dpa_vs_1dpa	DEG
ifit8	1.55712e-132	-0.4173	0.015	0.131	3.79626e-128	Intermediate_Epithelial_0dpa_vs_1dpa	DEG
pla2g7	2.53661e-132	-0.484819	0.369	0.569	6.18425e-128	Intermediate_Epithelial_0dpa_vs_1dpa	DEG
smarca4a	3.43417e-132	-0.46766	0.159	0.338	8.37251e-128	Intermediate_Epithelial_0dpa_vs_1dpa	DEG
si:ch73-289h5.4	4.35767e-132	-0.504442	0.105	0.268	1.0624e-127	Intermediate_Epithelial_0dpa_vs_1dpa	DEG
arpc5a	4.47888e-132	-0.469318	0.209	0.397	1.09195e-127	Intermediate_Epithelial_0dpa_vs_1dpa	DEG
frem2b	7.37981e-132	-0.486131	0.015	0.129	1.7992e-127	Intermediate_Epithelial_0dpa_vs_1dpa	DEG
mxra8a	1.90254e-131	-0.383462	0.003	0.106	4.63838e-127	Intermediate_Epithelial_0dpa_vs_1dpa	DEG
psmb7	1.95216e-131	-0.338526	0.005	0.111	4.75938e-127	Intermediate_Epithelial_0dpa_vs_1dpa	DEG
adamtsl7	2.05854e-131	-0.477302	0.002	0.103	5.01871e-127	Intermediate_Epithelial_0dpa_vs_1dpa	DEG
ppfibp2a	2.1116e-131	-0.397943	0.01	0.121	5.14809e-127	Intermediate_Epithelial_0dpa_vs_1dpa	DEG
arrdc1a	2.13394e-131	0.556904	0.684	0.562	5.20255e-127	Intermediate_Epithelial_0dpa_vs_1dpa	DEG
ptpmt1	2.65344e-131	0.350807	0.118	0.024	6.46908e-127	Intermediate_Epithelial_0dpa_vs_1dpa	DEG
hcar1-4	4.06242e-131	0.310753	0.12	0.025	9.90418e-127	Intermediate_Epithelial_0dpa_vs_1dpa	DEG
rps25	4.8485e-131	0.418011	0.943	0.938	1.18207e-126	Intermediate_Epithelial_0dpa_vs_1dpa	DEG
nmt1a	5.76222e-131	-0.405796	0.059	0.203	1.40483e-126	Intermediate_Epithelial_0dpa_vs_1dpa	DEG
ell	9.34773e-131	0.738099	0.351	0.194	2.27898e-126	Intermediate_Epithelial_0dpa_vs_1dpa	DEG
uggt1	1.24349e-130	-0.464365	0.148	0.324	3.03164e-126	Intermediate_Epithelial_0dpa_vs_1dpa	DEG
arhgap36	1.37865e-130	-0.533221	0.057	0.2	3.36114e-126	Intermediate_Epithelial_0dpa_vs_1dpa	DEG
tob1a	1.75451e-130	0.606293	0.482	0.32	4.27749e-126	Intermediate_Epithelial_0dpa_vs_1dpa	DEG
nop2	3.27844e-130	0.480931	0.232	0.093	7.99283e-126	Intermediate_Epithelial_0dpa_vs_1dpa	DEG
zgc:77158	5.3366e-130	0.764638	0.419	0.266	1.30106e-125	Intermediate_Epithelial_0dpa_vs_1dpa	DEG
fam102bb	6.78796e-130	-0.444642	0.068	0.217	1.65491e-125	Intermediate_Epithelial_0dpa_vs_1dpa	DEG
si:ch73-252p3.1	7.95613e-130	-0.432594	0.082	0.238	1.93971e-125	Intermediate_Epithelial_0dpa_vs_1dpa	DEG
GAN	8.27265e-130	-0.404268	0.051	0.192	2.01687e-125	Intermediate_Epithelial_0dpa_vs_1dpa	DEG
dop1b	1.00888e-129	-0.512308	0.148	0.321	2.45964e-125	Intermediate_Epithelial_0dpa_vs_1dpa	DEG
rpl34	2.84433e-129	0.440556	0.898	0.883	6.93447e-125	Intermediate_Epithelial_0dpa_vs_1dpa	DEG
castor2	3.01541e-129	-0.457731	0.095	0.255	7.35157e-125	Intermediate_Epithelial_0dpa_vs_1dpa	DEG
zgc:77439	3.28092e-129	0.31445	0.122	0.026	7.99888e-125	Intermediate_Epithelial_0dpa_vs_1dpa	DEG
gnl2	4.2428e-129	0.430582	0.217	0.083	1.03439e-124	Intermediate_Epithelial_0dpa_vs_1dpa	DEG
slc12a4	7.05803e-129	-0.373016	0.02	0.137	1.72075e-124	Intermediate_Epithelial_0dpa_vs_1dpa	DEG
reps1	1.50693e-128	-0.446163	0.092	0.249	3.6739e-124	Intermediate_Epithelial_0dpa_vs_1dpa	DEG
idh2	2.33525e-128	-0.369075	0.028	0.152	5.69333e-124	Intermediate_Epithelial_0dpa_vs_1dpa	DEG
igf1ra	2.56806e-128	-0.485091	0.333	0.532	6.26093e-124	Intermediate_Epithelial_0dpa_vs_1dpa	DEG
sox13	2.97453e-128	0.290995	0.106	0.018	7.2519e-124	Intermediate_Epithelial_0dpa_vs_1dpa	DEG
cdc42se1	3.06935e-128	-0.470289	0.36	0.556	7.48306e-124	Intermediate_Epithelial_0dpa_vs_1dpa	DEG
lrpap1	3.56618e-128	-0.42192	0.062	0.206	8.69435e-124	Intermediate_Epithelial_0dpa_vs_1dpa	DEG
ephb2b	3.59775e-128	0.427849	0.125	0.028	8.77132e-124	Intermediate_Epithelial_0dpa_vs_1dpa	DEG
kank1a	4.79764e-128	0.684429	0.406	0.246	1.16967e-123	Intermediate_Epithelial_0dpa_vs_1dpa	DEG
sall1b	6.28496e-128	-0.328299	0.003	0.103	1.53227e-123	Intermediate_Epithelial_0dpa_vs_1dpa	DEG
srgap2	9.17475e-128	-0.557719	0.316	0.506	2.2368e-123	Intermediate_Epithelial_0dpa_vs_1dpa	DEG
bicdl2l	9.91773e-128	0.660624	0.388	0.229	2.41794e-123	Intermediate_Epithelial_0dpa_vs_1dpa	DEG
arid5b	1.18762e-127	-0.551775	0.17	0.346	2.89541e-123	Intermediate_Epithelial_0dpa_vs_1dpa	DEG
selenou1a	1.86657e-127	-0.413317	0.061	0.204	4.5507e-123	Intermediate_Epithelial_0dpa_vs_1dpa	DEG
si:ch1073-15f12.3	2.23109e-127	-0.438443	0.024	0.143	5.43939e-123	Intermediate_Epithelial_0dpa_vs_1dpa	DEG
C7H16orf87	2.31202e-127	-0.393874	0.038	0.169	5.63671e-123	Intermediate_Epithelial_0dpa_vs_1dpa	DEG
insrb	3.46819e-127	-0.469985	0.373	0.57	8.45544e-123	Intermediate_Epithelial_0dpa_vs_1dpa	DEG
naga	3.53736e-127	-0.6123	0.114	0.273	8.62409e-123	Intermediate_Epithelial_0dpa_vs_1dpa	DEG
st14b	4.94752e-127	0.595087	0.553	0.395	1.20621e-122	Intermediate_Epithelial_0dpa_vs_1dpa	DEG
si:dkey-223p19.1	5.11453e-127	0.395419	0.115	0.023	1.24692e-122	Intermediate_Epithelial_0dpa_vs_1dpa	DEG
si:ch211-165e15.1	7.12938e-127	-0.482739	0.093	0.248	1.73814e-122	Intermediate_Epithelial_0dpa_vs_1dpa	DEG
oaz1b	7.55914e-127	0.536253	0.672	0.562	1.84292e-122	Intermediate_Epithelial_0dpa_vs_1dpa	DEG
adrb2a	1.0093e-126	0.602589	0.553	0.4	2.46068e-122	Intermediate_Epithelial_0dpa_vs_1dpa	DEG
psmc3	1.19874e-126	-0.457782	0.099	0.255	2.92254e-122	Intermediate_Epithelial_0dpa_vs_1dpa	DEG
sem1	1.45893e-126	-0.45502	0.154	0.33	3.55687e-122	Intermediate_Epithelial_0dpa_vs_1dpa	DEG
fat2	2.01925e-126	-0.407056	0.774	0.879	4.92293e-122	Intermediate_Epithelial_0dpa_vs_1dpa	DEG
psmf1	2.58806e-126	-0.427432	0.053	0.191	6.30968e-122	Intermediate_Epithelial_0dpa_vs_1dpa	DEG
mapk4	3.36974e-126	-0.341307	0.01	0.116	8.21543e-122	Intermediate_Epithelial_0dpa_vs_1dpa	DEG
nckap1	4.53217e-126	-0.459201	0.263	0.451	1.10494e-121	Intermediate_Epithelial_0dpa_vs_1dpa	DEG
si:ch211-284f22.3	1.4912e-125	0.536616	0.265	0.121	3.63554e-121	Intermediate_Epithelial_0dpa_vs_1dpa	DEG
dgkza	1.94826e-125	0.719318	0.377	0.221	4.74987e-121	Intermediate_Epithelial_0dpa_vs_1dpa	DEG
arpc2	2.00975e-125	-0.47459	0.268	0.456	4.89978e-121	Intermediate_Epithelial_0dpa_vs_1dpa	DEG
cdh26.2	2.40978e-125	0.30599	0.104	0.018	5.87504e-121	Intermediate_Epithelial_0dpa_vs_1dpa	DEG
col4a5	3.09172e-125	-0.429733	0.068	0.211	7.5376e-121	Intermediate_Epithelial_0dpa_vs_1dpa	DEG
manf	3.9941e-125	-0.484055	0.197	0.379	9.73762e-121	Intermediate_Epithelial_0dpa_vs_1dpa	DEG
slc16a12b	4.17923e-125	0.553297	0.314	0.158	1.0189e-120	Intermediate_Epithelial_0dpa_vs_1dpa	DEG
odc1	5.32557e-125	0.670993	0.477	0.325	1.29837e-120	Intermediate_Epithelial_0dpa_vs_1dpa	DEG
psmd3	5.83038e-125	-0.420254	0.083	0.234	1.42145e-120	Intermediate_Epithelial_0dpa_vs_1dpa	DEG
ddx18	1.03695e-124	0.543216	0.269	0.125	2.52808e-120	Intermediate_Epithelial_0dpa_vs_1dpa	DEG
ube2na	1.09839e-124	-0.449332	0.112	0.273	2.67788e-120	Intermediate_Epithelial_0dpa_vs_1dpa	DEG
mgst3a	1.65802e-124	-0.480073	0.126	0.29	4.04225e-120	Intermediate_Epithelial_0dpa_vs_1dpa	DEG
rnf38	1.82452e-124	0.698544	0.744	0.703	4.44818e-120	Intermediate_Epithelial_0dpa_vs_1dpa	DEG
hadhab	3.42781e-124	-0.384183	0.06	0.2	8.357e-120	Intermediate_Epithelial_0dpa_vs_1dpa	DEG
grhl3	1.27397e-123	0.546235	0.372	0.208	3.10594e-119	Intermediate_Epithelial_0dpa_vs_1dpa	DEG
CABZ01086293.1	1.34214e-123	-0.326249	0.02	0.134	3.27213e-119	Intermediate_Epithelial_0dpa_vs_1dpa	DEG
mov10a	1.50392e-123	-0.476525	0.243	0.428	3.66655e-119	Intermediate_Epithelial_0dpa_vs_1dpa	DEG
magi1b	5.3478e-123	0.610877	0.628	0.489	1.30379e-118	Intermediate_Epithelial_0dpa_vs_1dpa	DEG
mrtfbb	5.5791e-123	0.53009	0.413	0.244	1.36018e-118	Intermediate_Epithelial_0dpa_vs_1dpa	DEG
enc3	9.26932e-123	0.41173	0.183	0.063	2.25986e-118	Intermediate_Epithelial_0dpa_vs_1dpa	DEG
ptk6a	1.07022e-122	0.352812	0.157	0.046	2.60919e-118	Intermediate_Epithelial_0dpa_vs_1dpa	DEG
ube4b	2.04869e-122	-0.443158	0.186	0.363	4.9947e-118	Intermediate_Epithelial_0dpa_vs_1dpa	DEG
si:dkey-188i13.11	2.10237e-122	-0.342048	0.011	0.116	5.12557e-118	Intermediate_Epithelial_0dpa_vs_1dpa	DEG
zgc:172120	2.82458e-122	-0.476978	0.134	0.299	6.88633e-118	Intermediate_Epithelial_0dpa_vs_1dpa	DEG
ptk2aa	5.54004e-122	-0.365248	0.019	0.131	1.35066e-117	Intermediate_Epithelial_0dpa_vs_1dpa	DEG
h1-0	5.70004e-122	-0.482464	0.063	0.202	1.38967e-117	Intermediate_Epithelial_0dpa_vs_1dpa	DEG
rpl39	9.14512e-122	0.440345	0.896	0.868	2.22958e-117	Intermediate_Epithelial_0dpa_vs_1dpa	DEG
parp12a	1.41555e-121	-0.483298	0.054	0.189	3.45112e-117	Intermediate_Epithelial_0dpa_vs_1dpa	DEG
si:ch1073-181h11.2	2.16487e-121	-0.510996	0.161	0.329	5.27796e-117	Intermediate_Epithelial_0dpa_vs_1dpa	DEG
inhbaa	2.46336e-121	-0.527642	0.005	0.103	6.00567e-117	Intermediate_Epithelial_0dpa_vs_1dpa	DEG
ftr14l	2.56888e-121	0.586003	0.294	0.145	6.26292e-117	Intermediate_Epithelial_0dpa_vs_1dpa	DEG
lpcat1	2.64056e-121	0.412161	0.188	0.067	6.43769e-117	Intermediate_Epithelial_0dpa_vs_1dpa	DEG
PPP1CA	3.0588e-121	0.560112	0.368	0.211	7.45737e-117	Intermediate_Epithelial_0dpa_vs_1dpa	DEG
vps35	4.24056e-121	-0.445898	0.139	0.304	1.03385e-116	Intermediate_Epithelial_0dpa_vs_1dpa	DEG
mapkbp1	6.24039e-121	-0.438338	0.082	0.23	1.52141e-116	Intermediate_Epithelial_0dpa_vs_1dpa	DEG
creb5a	7.39903e-121	0.5444	0.349	0.189	1.80388e-116	Intermediate_Epithelial_0dpa_vs_1dpa	DEG
caspbl	1.11113e-120	-0.362284	0.024	0.139	2.70893e-116	Intermediate_Epithelial_0dpa_vs_1dpa	DEG
klf3	1.17541e-120	0.678279	0.52	0.37	2.86565e-116	Intermediate_Epithelial_0dpa_vs_1dpa	DEG
arhgap5	1.19329e-120	-0.481617	0.298	0.482	2.90925e-116	Intermediate_Epithelial_0dpa_vs_1dpa	DEG
rab7a	1.19507e-120	0.586985	0.576	0.444	2.91357e-116	Intermediate_Epithelial_0dpa_vs_1dpa	DEG
ptmaa	1.68264e-120	-0.522057	0.254	0.434	4.10228e-116	Intermediate_Epithelial_0dpa_vs_1dpa	DEG
psmb9a	3.04101e-120	-0.423152	0.068	0.208	7.41398e-116	Intermediate_Epithelial_0dpa_vs_1dpa	DEG
jpt2	3.5708e-120	-0.452521	0.109	0.264	8.70561e-116	Intermediate_Epithelial_0dpa_vs_1dpa	DEG
si:ch73-184c24.1	5.51274e-120	0.465881	0.214	0.084	1.34401e-115	Intermediate_Epithelial_0dpa_vs_1dpa	DEG
notch2	6.95828e-120	-0.400976	0.675	0.824	1.69643e-115	Intermediate_Epithelial_0dpa_vs_1dpa	DEG
kdm1a	1.21412e-119	-0.437268	0.195	0.372	2.96002e-115	Intermediate_Epithelial_0dpa_vs_1dpa	DEG
tbl1xr1a	1.23274e-119	-0.464239	0.317	0.502	3.00541e-115	Intermediate_Epithelial_0dpa_vs_1dpa	DEG
znf750	1.87801e-119	-0.530933	0.296	0.478	4.57858e-115	Intermediate_Epithelial_0dpa_vs_1dpa	DEG
irs1	1.9812e-119	-0.493056	0.062	0.197	4.83016e-115	Intermediate_Epithelial_0dpa_vs_1dpa	DEG
celsr1a	3.23501e-119	0.573275	0.594	0.464	7.88695e-115	Intermediate_Epithelial_0dpa_vs_1dpa	DEG
moxd1	3.36079e-119	0.384425	0.173	0.057	8.1936e-115	Intermediate_Epithelial_0dpa_vs_1dpa	DEG
pard6gb	3.53506e-119	-0.499092	0.128	0.289	8.61848e-115	Intermediate_Epithelial_0dpa_vs_1dpa	DEG
clca1	4.95592e-119	-0.345649	0.021	0.133	1.20825e-114	Intermediate_Epithelial_0dpa_vs_1dpa	DEG
traf3	5.36503e-119	-0.52029	0.122	0.282	1.30799e-114	Intermediate_Epithelial_0dpa_vs_1dpa	DEG
hs6st1b	8.49566e-119	0.544514	0.252	0.114	2.07124e-114	Intermediate_Epithelial_0dpa_vs_1dpa	DEG
arhgap29a	1.95325e-118	-0.409764	0.01	0.112	4.76202e-114	Intermediate_Epithelial_0dpa_vs_1dpa	DEG
mtdha	2.96155e-118	-0.462087	0.452	0.628	7.22025e-114	Intermediate_Epithelial_0dpa_vs_1dpa	DEG
sipa1l3	2.99218e-118	0.523063	0.629	0.506	7.29495e-114	Intermediate_Epithelial_0dpa_vs_1dpa	DEG
f2rl1.2	3.07449e-118	0.680515	0.382	0.233	7.49561e-114	Intermediate_Epithelial_0dpa_vs_1dpa	DEG
nme2b.1	4.02309e-118	-0.386847	0.725	0.853	9.8083e-114	Intermediate_Epithelial_0dpa_vs_1dpa	DEG
rasgef1bb	1.6156e-117	-0.443627	0.327	0.521	3.93883e-113	Intermediate_Epithelial_0dpa_vs_1dpa	DEG
atf7ip	1.75647e-117	-0.496274	0.118	0.274	4.28227e-113	Intermediate_Epithelial_0dpa_vs_1dpa	DEG
kcnb1	1.76649e-117	0.545267	0.189	0.069	4.3067e-113	Intermediate_Epithelial_0dpa_vs_1dpa	DEG
sh3rf1	2.70228e-117	-0.531173	0.196	0.366	6.58816e-113	Intermediate_Epithelial_0dpa_vs_1dpa	DEG
CR388207.1	3.25837e-117	-0.432665	0.044	0.168	7.94391e-113	Intermediate_Epithelial_0dpa_vs_1dpa	DEG
ncoa3	3.67411e-117	-0.498245	0.306	0.487	8.95747e-113	Intermediate_Epithelial_0dpa_vs_1dpa	DEG
cdk16	5.91195e-117	0.634856	0.535	0.395	1.44133e-112	Intermediate_Epithelial_0dpa_vs_1dpa	DEG
dapk2b	8.62076e-117	0.429319	0.121	0.029	2.10174e-112	Intermediate_Epithelial_0dpa_vs_1dpa	DEG
gsnb	1.14553e-116	-0.459687	0.414	0.597	2.7928e-112	Intermediate_Epithelial_0dpa_vs_1dpa	DEG
noc2l	1.25884e-116	0.430597	0.174	0.06	3.06905e-112	Intermediate_Epithelial_0dpa_vs_1dpa	DEG
si:ch73-335l21.4	1.2925e-116	0.907556	0.618	0.499	3.15111e-112	Intermediate_Epithelial_0dpa_vs_1dpa	DEG
spcs2	1.40938e-116	-0.412589	0.091	0.238	3.43606e-112	Intermediate_Epithelial_0dpa_vs_1dpa	DEG
arhgap42a	1.44177e-116	-0.445906	0.081	0.225	3.51503e-112	Intermediate_Epithelial_0dpa_vs_1dpa	DEG
psmd6	2.22482e-116	-0.413212	0.081	0.223	5.4241e-112	Intermediate_Epithelial_0dpa_vs_1dpa	DEG
otud7b	2.30792e-116	-0.398759	0.071	0.211	5.6267e-112	Intermediate_Epithelial_0dpa_vs_1dpa	DEG
ppt1	2.68302e-116	-0.449225	0.197	0.372	6.54121e-112	Intermediate_Epithelial_0dpa_vs_1dpa	DEG
tspan7	3.52232e-116	-0.356978	0.033	0.152	8.58743e-112	Intermediate_Epithelial_0dpa_vs_1dpa	DEG
psma1	4.04908e-116	-0.468236	0.207	0.38	9.87165e-112	Intermediate_Epithelial_0dpa_vs_1dpa	DEG
rasal2	4.51114e-116	0.604507	0.554	0.404	1.09982e-111	Intermediate_Epithelial_0dpa_vs_1dpa	DEG
ldlra	4.68747e-116	0.752352	0.357	0.209	1.14281e-111	Intermediate_Epithelial_0dpa_vs_1dpa	DEG
si:ch73-141c7.1	7.62496e-116	0.369754	0.167	0.055	1.85896e-111	Intermediate_Epithelial_0dpa_vs_1dpa	DEG
psenen	8.21631e-116	-0.429245	0.115	0.269	2.00314e-111	Intermediate_Epithelial_0dpa_vs_1dpa	DEG
pard3ba.1	1.17938e-115	0.556337	0.578	0.442	2.87533e-111	Intermediate_Epithelial_0dpa_vs_1dpa	DEG
sri	1.29464e-115	-0.403758	0.075	0.216	3.15634e-111	Intermediate_Epithelial_0dpa_vs_1dpa	DEG
si:ch211-91p5.3	2.00306e-115	-0.458761	0.093	0.239	4.88347e-111	Intermediate_Epithelial_0dpa_vs_1dpa	DEG
pafah1b1b	2.3209e-115	-0.414952	0.095	0.241	5.65837e-111	Intermediate_Epithelial_0dpa_vs_1dpa	DEG
si:dkey-12j5.1	2.87048e-115	0.496404	0.217	0.09	6.99824e-111	Intermediate_Epithelial_0dpa_vs_1dpa	DEG
fam162a	4.42977e-115	-0.450912	0.248	0.427	1.07998e-110	Intermediate_Epithelial_0dpa_vs_1dpa	DEG
arpc4	4.45579e-115	-0.447308	0.171	0.338	1.08632e-110	Intermediate_Epithelial_0dpa_vs_1dpa	DEG
si:dkey-147f3.8	7.87489e-115	0.435496	0.208	0.084	1.9199e-110	Intermediate_Epithelial_0dpa_vs_1dpa	DEG
crip2	1.27641e-114	-0.393873	0.03	0.145	3.11188e-110	Intermediate_Epithelial_0dpa_vs_1dpa	DEG
bnc2	1.50821e-114	-0.567825	0.081	0.221	3.67702e-110	Intermediate_Epithelial_0dpa_vs_1dpa	DEG
serpinb1l3	1.64146e-114	0.391102	0.198	0.076	4.00189e-110	Intermediate_Epithelial_0dpa_vs_1dpa	DEG
il1rapl2	1.79532e-114	-0.457233	0.176	0.342	4.377e-110	Intermediate_Epithelial_0dpa_vs_1dpa	DEG
sdf2l1	1.80138e-114	-0.380397	0.05	0.178	4.39175e-110	Intermediate_Epithelial_0dpa_vs_1dpa	DEG
lims1	1.94123e-114	-0.355911	0.037	0.157	4.73271e-110	Intermediate_Epithelial_0dpa_vs_1dpa	DEG
deptor	1.95555e-114	0.649512	0.471	0.321	4.76763e-110	Intermediate_Epithelial_0dpa_vs_1dpa	DEG
wnt7ab	2.12987e-114	0.354362	0.142	0.041	5.19263e-110	Intermediate_Epithelial_0dpa_vs_1dpa	DEG
maff	2.24126e-114	0.552476	0.52	0.377	5.4642e-110	Intermediate_Epithelial_0dpa_vs_1dpa	DEG
col5a1	2.85185e-114	-0.614416	0.04	0.161	6.95282e-110	Intermediate_Epithelial_0dpa_vs_1dpa	DEG
pkig	4.08273e-114	-0.374128	0.03	0.145	9.9537e-110	Intermediate_Epithelial_0dpa_vs_1dpa	DEG
usp14	4.67354e-114	-0.383213	0.056	0.186	1.13941e-109	Intermediate_Epithelial_0dpa_vs_1dpa	DEG
mxe	6.62355e-114	-0.505518	0.08	0.219	1.61482e-109	Intermediate_Epithelial_0dpa_vs_1dpa	DEG
atp5pd	6.9333e-114	-0.465958	0.144	0.303	1.69034e-109	Intermediate_Epithelial_0dpa_vs_1dpa	DEG
eef1da	7.78122e-114	0.531888	0.5	0.353	1.89706e-109	Intermediate_Epithelial_0dpa_vs_1dpa	DEG
hip1rb	8.33453e-114	0.783693	0.333	0.187	2.03196e-109	Intermediate_Epithelial_0dpa_vs_1dpa	DEG
MYADM	1.48142e-113	-0.445398	0.216	0.392	3.6117e-109	Intermediate_Epithelial_0dpa_vs_1dpa	DEG
cavin2a	1.59757e-113	0.455747	0.31	0.161	3.89488e-109	Intermediate_Epithelial_0dpa_vs_1dpa	DEG
mgat4b	1.84545e-113	0.524796	0.171	0.06	4.4992e-109	Intermediate_Epithelial_0dpa_vs_1dpa	DEG
rab40b	2.74792e-113	0.493893	0.248	0.114	6.69942e-109	Intermediate_Epithelial_0dpa_vs_1dpa	DEG
FO904966.2	2.99067e-113	0.393951	0.131	0.035	7.29125e-109	Intermediate_Epithelial_0dpa_vs_1dpa	DEG
tbca	5.31738e-113	-0.412937	0.085	0.227	1.29638e-108	Intermediate_Epithelial_0dpa_vs_1dpa	DEG
ginm1	5.9835e-113	-0.471717	0.197	0.367	1.45878e-108	Intermediate_Epithelial_0dpa_vs_1dpa	DEG
farp2	6.23832e-113	-0.436332	0.128	0.284	1.5209e-108	Intermediate_Epithelial_0dpa_vs_1dpa	DEG
atp6ap1b	6.44494e-113	-0.450019	0.186	0.353	1.57128e-108	Intermediate_Epithelial_0dpa_vs_1dpa	DEG
cndp2	8.44073e-113	-0.433428	0.135	0.293	2.05785e-108	Intermediate_Epithelial_0dpa_vs_1dpa	DEG
noxa1	1.23576e-112	0.540429	0.216	0.091	3.01277e-108	Intermediate_Epithelial_0dpa_vs_1dpa	DEG
asxl2	1.33097e-112	-0.377835	0.047	0.172	3.24492e-108	Intermediate_Epithelial_0dpa_vs_1dpa	DEG
esrp1	1.61381e-112	-0.343105	0.599	0.773	3.93447e-108	Intermediate_Epithelial_0dpa_vs_1dpa	DEG
slc49a4	1.63287e-112	-0.458572	0.114	0.264	3.98093e-108	Intermediate_Epithelial_0dpa_vs_1dpa	DEG
spcs3	1.76099e-112	-0.409354	0.109	0.26	4.29329e-108	Intermediate_Epithelial_0dpa_vs_1dpa	DEG
itpk1b	2.89543e-112	0.457165	0.161	0.054	7.05907e-108	Intermediate_Epithelial_0dpa_vs_1dpa	DEG
uck2b	3.27177e-112	0.419504	0.185	0.069	7.97657e-108	Intermediate_Epithelial_0dpa_vs_1dpa	DEG
dynlrb1	3.94249e-112	-0.378363	0.061	0.193	9.61178e-108	Intermediate_Epithelial_0dpa_vs_1dpa	DEG
si:rp71-1i20.2	5.97331e-112	-0.446529	0.173	0.339	1.45629e-107	Intermediate_Epithelial_0dpa_vs_1dpa	DEG
dap1b.1	6.03464e-112	0.427595	0.225	0.096	1.47124e-107	Intermediate_Epithelial_0dpa_vs_1dpa	DEG
psma6l	6.236e-112	-0.379752	0.061	0.192	1.52034e-107	Intermediate_Epithelial_0dpa_vs_1dpa	DEG
CABZ01055347.1	7.10524e-112	0.612454	0.265	0.131	1.73226e-107	Intermediate_Epithelial_0dpa_vs_1dpa	DEG
mesd	7.74674e-112	-0.380809	0.071	0.207	1.88865e-107	Intermediate_Epithelial_0dpa_vs_1dpa	DEG
plxnb2a.1	9.05362e-112	-0.458459	0.275	0.45	2.20727e-107	Intermediate_Epithelial_0dpa_vs_1dpa	DEG
si:dkey-23k10.5	1.07403e-111	-0.410226	0.069	0.203	2.61849e-107	Intermediate_Epithelial_0dpa_vs_1dpa	DEG
ipo11	1.12402e-111	0.567284	0.363	0.213	2.74035e-107	Intermediate_Epithelial_0dpa_vs_1dpa	DEG
btbd11a	1.40284e-111	-0.476236	0.485	0.661	3.42013e-107	Intermediate_Epithelial_0dpa_vs_1dpa	DEG
slc46a2	1.4856e-111	0.355835	0.141	0.041	3.62189e-107	Intermediate_Epithelial_0dpa_vs_1dpa	DEG
si:ch211-79k12.1	1.77958e-111	0.534792	0.507	0.34	4.33861e-107	Intermediate_Epithelial_0dpa_vs_1dpa	DEG
sqstm1	1.78116e-111	0.49998	0.672	0.537	4.34247e-107	Intermediate_Epithelial_0dpa_vs_1dpa	DEG
mep1a.1	2.29993e-111	-0.376307	0.058	0.188	5.60722e-107	Intermediate_Epithelial_0dpa_vs_1dpa	DEG
tnfrsf21	3.83816e-111	0.752686	0.486	0.352	9.35744e-107	Intermediate_Epithelial_0dpa_vs_1dpa	DEG
smdt1b	4.31866e-111	-0.451888	0.192	0.359	1.05289e-106	Intermediate_Epithelial_0dpa_vs_1dpa	DEG
plekha7b	5.82084e-111	0.397413	0.166	0.057	1.41912e-106	Intermediate_Epithelial_0dpa_vs_1dpa	DEG
si:dkey-97a13.6	6.31533e-111	-0.348667	0.021	0.127	1.53968e-106	Intermediate_Epithelial_0dpa_vs_1dpa	DEG
psmd4b	8.59381e-111	-0.419015	0.12	0.272	2.09517e-106	Intermediate_Epithelial_0dpa_vs_1dpa	DEG
psma6b	1.26928e-110	-0.389865	0.056	0.183	3.0945e-106	Intermediate_Epithelial_0dpa_vs_1dpa	DEG
gdi2	2.59229e-110	-0.453213	0.358	0.53	6.31999e-106	Intermediate_Epithelial_0dpa_vs_1dpa	DEG
calm3a	2.89081e-110	-0.415461	0.596	0.75	7.0478e-106	Intermediate_Epithelial_0dpa_vs_1dpa	DEG
amd1	4.39633e-110	0.564693	0.439	0.293	1.07182e-105	Intermediate_Epithelial_0dpa_vs_1dpa	DEG
capns1b	5.75736e-110	-0.406349	0.438	0.626	1.40364e-105	Intermediate_Epithelial_0dpa_vs_1dpa	DEG
cirbpb	1.05508e-109	0.445306	0.726	0.637	2.57228e-105	Intermediate_Epithelial_0dpa_vs_1dpa	DEG
si:dkey-188i13.6	1.33759e-109	-0.473844	0.197	0.363	3.26106e-105	Intermediate_Epithelial_0dpa_vs_1dpa	DEG
mydgf	2.26111e-109	-0.388643	0.072	0.206	5.51259e-105	Intermediate_Epithelial_0dpa_vs_1dpa	DEG
cfap57	2.29551e-109	-0.423317	0.022	0.126	5.59644e-105	Intermediate_Epithelial_0dpa_vs_1dpa	DEG
eif6	2.35507e-109	0.480742	0.342	0.192	5.74165e-105	Intermediate_Epithelial_0dpa_vs_1dpa	DEG
klf7b	3.21282e-109	-0.41364	0.048	0.169	7.83286e-105	Intermediate_Epithelial_0dpa_vs_1dpa	DEG
ctsd	3.7768e-109	-0.488767	0.335	0.514	9.20783e-105	Intermediate_Epithelial_0dpa_vs_1dpa	DEG
thrap3b	7.20532e-109	-0.418913	0.152	0.312	1.75666e-104	Intermediate_Epithelial_0dpa_vs_1dpa	DEG
col1a1a	7.66086e-109	-0.576039	0.049	0.17	1.86772e-104	Intermediate_Epithelial_0dpa_vs_1dpa	DEG
ndufs2	8.19578e-109	-0.39765	0.088	0.228	1.99813e-104	Intermediate_Epithelial_0dpa_vs_1dpa	DEG
eps8l1a	1.11051e-108	0.528519	0.249	0.115	2.70741e-104	Intermediate_Epithelial_0dpa_vs_1dpa	DEG
rab43	1.45827e-108	0.28304	0.122	0.031	3.55526e-104	Intermediate_Epithelial_0dpa_vs_1dpa	DEG
atp5mf	1.54552e-108	-0.444994	0.188	0.353	3.76798e-104	Intermediate_Epithelial_0dpa_vs_1dpa	DEG
p4hb	1.73553e-108	-0.446821	0.328	0.503	4.23121e-104	Intermediate_Epithelial_0dpa_vs_1dpa	DEG
scpep1	2.20116e-108	-0.373117	0.051	0.175	5.36642e-104	Intermediate_Epithelial_0dpa_vs_1dpa	DEG
stc2a	2.41855e-108	0.331698	0.152	0.049	5.89644e-104	Intermediate_Epithelial_0dpa_vs_1dpa	DEG
camk2g1	3.26618e-108	0.559002	0.379	0.231	7.96295e-104	Intermediate_Epithelial_0dpa_vs_1dpa	DEG
plscr3b	3.67035e-108	-0.424467	0.248	0.424	8.94832e-104	Intermediate_Epithelial_0dpa_vs_1dpa	DEG
aco2	4.08491e-108	-0.437762	0.163	0.32	9.959e-104	Intermediate_Epithelial_0dpa_vs_1dpa	DEG
higd1a	6.11461e-108	0.496305	0.647	0.535	1.49074e-103	Intermediate_Epithelial_0dpa_vs_1dpa	DEG
clocka	7.60139e-108	-0.350687	0.014	0.112	1.85322e-103	Intermediate_Epithelial_0dpa_vs_1dpa	DEG
gfpt2	1.35488e-107	0.649418	0.201	0.083	3.30321e-103	Intermediate_Epithelial_0dpa_vs_1dpa	DEG
vti1a	1.44015e-107	0.57619	0.46	0.312	3.51109e-103	Intermediate_Epithelial_0dpa_vs_1dpa	DEG
casz1	1.47926e-107	0.51467	0.677	0.574	3.60644e-103	Intermediate_Epithelial_0dpa_vs_1dpa	DEG
tp53inp1	1.92194e-107	-0.341842	0.04	0.156	4.68568e-103	Intermediate_Epithelial_0dpa_vs_1dpa	DEG
ccdc186	2.09278e-107	0.574333	0.363	0.216	5.1022e-103	Intermediate_Epithelial_0dpa_vs_1dpa	DEG
evpla	3.65248e-107	0.680318	0.936	0.944	8.90475e-103	Intermediate_Epithelial_0dpa_vs_1dpa	DEG
rab14	6.63067e-107	-0.436202	0.193	0.356	1.61656e-102	Intermediate_Epithelial_0dpa_vs_1dpa	DEG
tspan15	7.33766e-107	-0.418413	0.207	0.375	1.78892e-102	Intermediate_Epithelial_0dpa_vs_1dpa	DEG
tiparp	8.79772e-107	-0.43005	0.363	0.546	2.14488e-102	Intermediate_Epithelial_0dpa_vs_1dpa	DEG
dctn2	1.58285e-106	-0.394136	0.099	0.241	3.85899e-102	Intermediate_Epithelial_0dpa_vs_1dpa	DEG
RIN2	1.84688e-106	0.379142	0.181	0.069	4.50268e-102	Intermediate_Epithelial_0dpa_vs_1dpa	DEG
twistnb	2.26964e-106	0.333519	0.148	0.047	5.53339e-102	Intermediate_Epithelial_0dpa_vs_1dpa	DEG
psmb8a	3.28459e-106	-0.456249	0.175	0.335	8.00783e-102	Intermediate_Epithelial_0dpa_vs_1dpa	DEG
plekhg2	3.67106e-106	0.700793	0.669	0.616	8.95006e-102	Intermediate_Epithelial_0dpa_vs_1dpa	DEG
ms4a17a.2	4.59548e-106	-0.464242	0.309	0.482	1.12038e-101	Intermediate_Epithelial_0dpa_vs_1dpa	DEG
arl4cb	7.26458e-106	-0.378566	0.065	0.193	1.7711e-101	Intermediate_Epithelial_0dpa_vs_1dpa	DEG
snrpg	9.20686e-106	-0.39719	0.062	0.188	2.24463e-101	Intermediate_Epithelial_0dpa_vs_1dpa	DEG
si:ch211-232b12.5	9.28931e-106	0.412973	0.213	0.091	2.26473e-101	Intermediate_Epithelial_0dpa_vs_1dpa	DEG
ostm1	1.08457e-105	-0.364274	0.058	0.183	2.64417e-101	Intermediate_Epithelial_0dpa_vs_1dpa	DEG
CHST13	1.10005e-105	0.610238	0.304	0.166	2.68192e-101	Intermediate_Epithelial_0dpa_vs_1dpa	DEG
nkain2	1.20215e-105	-0.415611	0.014	0.109	2.93084e-101	Intermediate_Epithelial_0dpa_vs_1dpa	DEG
sgip1a	1.34137e-105	0.40397	0.12	0.032	3.27026e-101	Intermediate_Epithelial_0dpa_vs_1dpa	DEG
ddx27	1.43317e-105	0.392934	0.183	0.07	3.49406e-101	Intermediate_Epithelial_0dpa_vs_1dpa	DEG
gria4a	1.44855e-105	-0.460978	0.27	0.438	3.53158e-101	Intermediate_Epithelial_0dpa_vs_1dpa	DEG
tdrd7b	1.46748e-105	-0.401348	0.047	0.166	3.57773e-101	Intermediate_Epithelial_0dpa_vs_1dpa	DEG
pla2g4f.1	2.97353e-105	0.438587	0.242	0.112	7.24948e-101	Intermediate_Epithelial_0dpa_vs_1dpa	DEG
gstr	3.02453e-105	0.281492	0.117	0.03	7.3738e-101	Intermediate_Epithelial_0dpa_vs_1dpa	DEG
sema3aa	7.35385e-105	0.358234	0.128	0.037	1.79287e-100	Intermediate_Epithelial_0dpa_vs_1dpa	DEG
dhrs11a	7.68591e-105	-0.450773	0.114	0.261	1.87383e-100	Intermediate_Epithelial_0dpa_vs_1dpa	DEG
nsfl1c	9.68578e-105	-0.35788	0.06	0.185	2.36139e-100	Intermediate_Epithelial_0dpa_vs_1dpa	DEG
phf11	1.25593e-104	-0.375126	0.039	0.153	3.06197e-100	Intermediate_Epithelial_0dpa_vs_1dpa	DEG
slc31a1	1.89785e-104	-0.396233	0.085	0.22	4.62696e-100	Intermediate_Epithelial_0dpa_vs_1dpa	DEG
si:ch211-113j14.1	4.36135e-104	0.357674	0.133	0.039	1.0633e-99	Intermediate_Epithelial_0dpa_vs_1dpa	DEG
aif1l	4.62568e-104	-0.297385	0.01	0.1	1.12774e-99	Intermediate_Epithelial_0dpa_vs_1dpa	DEG
arhgdia	5.9077e-104	-0.424124	0.162	0.316	1.4403e-99	Intermediate_Epithelial_0dpa_vs_1dpa	DEG
prkn	6.23154e-104	0.337081	0.13	0.038	1.51925e-99	Intermediate_Epithelial_0dpa_vs_1dpa	DEG
bambia	1.39996e-103	-0.429054	0.093	0.231	3.4131e-99	Intermediate_Epithelial_0dpa_vs_1dpa	DEG
nucb2a	1.53449e-103	-0.30874	0.03	0.136	3.74109e-99	Intermediate_Epithelial_0dpa_vs_1dpa	DEG
carmil3	1.63773e-103	-0.544245	0.046	0.161	3.99278e-99	Intermediate_Epithelial_0dpa_vs_1dpa	DEG
hoxc3a	2.32076e-103	0.442219	0.19	0.076	5.65801e-99	Intermediate_Epithelial_0dpa_vs_1dpa	DEG
slc38a4	2.37674e-103	0.498567	0.263	0.13	5.79449e-99	Intermediate_Epithelial_0dpa_vs_1dpa	DEG
ppp1r12a	3.05913e-103	-0.416923	0.346	0.524	7.45816e-99	Intermediate_Epithelial_0dpa_vs_1dpa	DEG
immp2l	3.33452e-103	0.575689	0.224	0.101	8.12956e-99	Intermediate_Epithelial_0dpa_vs_1dpa	DEG
cyfip1	4.36745e-103	-0.40934	0.388	0.562	1.06478e-98	Intermediate_Epithelial_0dpa_vs_1dpa	DEG
jag2a	4.43974e-103	-0.51358	0.166	0.318	1.08241e-98	Intermediate_Epithelial_0dpa_vs_1dpa	DEG
pde7a	4.46849e-103	0.583485	0.205	0.088	1.08942e-98	Intermediate_Epithelial_0dpa_vs_1dpa	DEG
b4galt6	4.8677e-103	0.52808	0.327	0.187	1.18674e-98	Intermediate_Epithelial_0dpa_vs_1dpa	DEG
tcirg1b	4.87097e-103	-0.347879	0.053	0.174	1.18754e-98	Intermediate_Epithelial_0dpa_vs_1dpa	DEG
zgc:193541	5.37779e-103	-0.426415	0.163	0.319	1.3111e-98	Intermediate_Epithelial_0dpa_vs_1dpa	DEG
si:ch211-218g4.2	5.61681e-103	-0.48443	0.172	0.326	1.36938e-98	Intermediate_Epithelial_0dpa_vs_1dpa	DEG
ugt2a4	6.28999e-103	0.526152	0.344	0.203	1.5335e-98	Intermediate_Epithelial_0dpa_vs_1dpa	DEG
zmp:0000000735	7.93204e-103	-0.321012	0.018	0.115	1.93383e-98	Intermediate_Epithelial_0dpa_vs_1dpa	DEG
ugt8	8.86878e-103	0.688906	0.645	0.578	2.16221e-98	Intermediate_Epithelial_0dpa_vs_1dpa	DEG
btr09	9.07838e-103	-0.384097	0.06	0.184	2.21331e-98	Intermediate_Epithelial_0dpa_vs_1dpa	DEG
zgc:110333	1.66446e-102	0.562668	0.245	0.116	4.05796e-98	Intermediate_Epithelial_0dpa_vs_1dpa	DEG
dpp7	1.76812e-102	-0.427661	0.108	0.249	4.31068e-98	Intermediate_Epithelial_0dpa_vs_1dpa	DEG
si:dkey-23k10.3	2.04012e-102	-0.319415	0.02	0.119	4.9738e-98	Intermediate_Epithelial_0dpa_vs_1dpa	DEG
krt91	2.23523e-102	-0.385543	0.995	0.998	5.4495e-98	Intermediate_Epithelial_0dpa_vs_1dpa	DEG
si:rp71-36a1.5	2.37845e-102	-0.469203	0.281	0.448	5.79867e-98	Intermediate_Epithelial_0dpa_vs_1dpa	DEG
pleca	2.4222e-102	0.67829	0.513	0.381	5.90532e-98	Intermediate_Epithelial_0dpa_vs_1dpa	DEG
uqcrc1	2.91406e-102	-0.431368	0.168	0.322	7.10448e-98	Intermediate_Epithelial_0dpa_vs_1dpa	DEG
man2b1	5.96209e-102	-0.422074	0.176	0.335	1.45356e-97	Intermediate_Epithelial_0dpa_vs_1dpa	DEG
ppiaa	1.10792e-101	0.3976	0.845	0.814	2.7011e-97	Intermediate_Epithelial_0dpa_vs_1dpa	DEG
pibf1	1.43513e-101	-0.493857	0.137	0.286	3.49885e-97	Intermediate_Epithelial_0dpa_vs_1dpa	DEG
erh	2.10787e-101	-0.411689	0.132	0.278	5.139e-97	Intermediate_Epithelial_0dpa_vs_1dpa	DEG
dcbld1	2.64907e-101	-0.361118	0.293	0.477	6.45844e-97	Intermediate_Epithelial_0dpa_vs_1dpa	DEG
slc25a29	5.64805e-101	0.369378	0.187	0.075	1.37699e-96	Intermediate_Epithelial_0dpa_vs_1dpa	DEG
runx3	5.85816e-101	0.486739	0.25	0.121	1.42822e-96	Intermediate_Epithelial_0dpa_vs_1dpa	DEG
crybg1a	7.63126e-101	-0.356218	0.67	0.814	1.8605e-96	Intermediate_Epithelial_0dpa_vs_1dpa	DEG
efs	8.93396e-101	-0.335196	0.045	0.159	2.1781e-96	Intermediate_Epithelial_0dpa_vs_1dpa	DEG
CABZ01058650.1	9.86006e-101	-0.292027	0.021	0.12	2.40388e-96	Intermediate_Epithelial_0dpa_vs_1dpa	DEG
rpl22	9.89894e-101	0.442517	0.8	0.76	2.41336e-96	Intermediate_Epithelial_0dpa_vs_1dpa	DEG
brf1a	1.99525e-100	0.550352	0.298	0.163	4.86442e-96	Intermediate_Epithelial_0dpa_vs_1dpa	DEG
chl1a	2.15481e-100	-0.521083	0.606	0.735	5.25342e-96	Intermediate_Epithelial_0dpa_vs_1dpa	DEG
slc45a4b	2.26034e-100	-0.415931	0.269	0.441	5.51071e-96	Intermediate_Epithelial_0dpa_vs_1dpa	DEG
fasn	3.84143e-100	0.551909	0.298	0.163	9.3654e-96	Intermediate_Epithelial_0dpa_vs_1dpa	DEG
ppp4cb	4.67986e-100	0.496181	0.42	0.276	1.14095e-95	Intermediate_Epithelial_0dpa_vs_1dpa	DEG
usp5	6.02584e-100	-0.343215	0.062	0.184	1.4691e-95	Intermediate_Epithelial_0dpa_vs_1dpa	DEG
atp5l	7.69886e-100	-0.437858	0.278	0.445	1.87698e-95	Intermediate_Epithelial_0dpa_vs_1dpa	DEG
serpine1	1.01757e-99	-0.425583	0.05	0.166	2.48084e-95	Intermediate_Epithelial_0dpa_vs_1dpa	DEG
psmc1b	1.42991e-99	-0.352226	0.062	0.183	3.48613e-95	Intermediate_Epithelial_0dpa_vs_1dpa	DEG
dyrk3	1.94092e-99	-0.430906	0.321	0.488	4.73196e-95	Intermediate_Epithelial_0dpa_vs_1dpa	DEG
fuca2	2.36142e-99	-0.463668	0.353	0.525	5.75714e-95	Intermediate_Epithelial_0dpa_vs_1dpa	DEG
cpdp	2.56488e-99	-0.397131	0.111	0.252	6.25319e-95	Intermediate_Epithelial_0dpa_vs_1dpa	DEG
mettl17	2.82664e-99	0.299234	0.123	0.035	6.89135e-95	Intermediate_Epithelial_0dpa_vs_1dpa	DEG
FO744833.2	4.2361e-99	-0.532749	0.29	0.448	1.03276e-94	Intermediate_Epithelial_0dpa_vs_1dpa	DEG
arfgef2	4.88063e-99	0.504532	0.377	0.236	1.1899e-94	Intermediate_Epithelial_0dpa_vs_1dpa	DEG
fbxw11b	7.13793e-99	0.531793	0.482	0.347	1.74023e-94	Intermediate_Epithelial_0dpa_vs_1dpa	DEG
dhcr24	8.91044e-99	0.306656	0.101	0.023	2.17237e-94	Intermediate_Epithelial_0dpa_vs_1dpa	DEG
slc39a7	1.63844e-98	-0.323465	0.056	0.174	3.99451e-94	Intermediate_Epithelial_0dpa_vs_1dpa	DEG
ube2v2	2.26858e-98	-0.41428	0.301	0.47	5.53079e-94	Intermediate_Epithelial_0dpa_vs_1dpa	DEG
sema4bb	2.32987e-98	-0.501139	0.081	0.206	5.68022e-94	Intermediate_Epithelial_0dpa_vs_1dpa	DEG
ilf2	2.82724e-98	-0.380446	0.104	0.24	6.8928e-94	Intermediate_Epithelial_0dpa_vs_1dpa	DEG
setd3	3.48865e-98	0.484531	0.293	0.159	8.50533e-94	Intermediate_Epithelial_0dpa_vs_1dpa	DEG
mdm2	4.41704e-98	-0.339264	0.03	0.133	1.07688e-93	Intermediate_Epithelial_0dpa_vs_1dpa	DEG
cox6c	4.66004e-98	-0.418364	0.271	0.436	1.13612e-93	Intermediate_Epithelial_0dpa_vs_1dpa	DEG
mid1ip1b	6.73501e-98	0.459291	0.359	0.213	1.642e-93	Intermediate_Epithelial_0dpa_vs_1dpa	DEG
wdr83os	8.10547e-98	-0.376784	0.077	0.203	1.97611e-93	Intermediate_Epithelial_0dpa_vs_1dpa	DEG
sfswap	1.27472e-97	0.531369	0.495	0.359	3.10777e-93	Intermediate_Epithelial_0dpa_vs_1dpa	DEG
PLEKHH3	1.31962e-97	0.562612	0.554	0.43	3.21723e-93	Intermediate_Epithelial_0dpa_vs_1dpa	DEG
tapbp.2	1.32686e-97	-0.360819	0.029	0.13	3.23488e-93	Intermediate_Epithelial_0dpa_vs_1dpa	DEG
dnmbp	1.68238e-97	0.502448	0.668	0.573	4.10165e-93	Intermediate_Epithelial_0dpa_vs_1dpa	DEG
macc1	1.90704e-97	0.496426	0.845	0.839	4.64936e-93	Intermediate_Epithelial_0dpa_vs_1dpa	DEG
anks1b	2.46097e-97	-0.413363	0.102	0.237	5.99985e-93	Intermediate_Epithelial_0dpa_vs_1dpa	DEG
nr1d2a	2.46159e-97	0.468759	0.179	0.072	6.00136e-93	Intermediate_Epithelial_0dpa_vs_1dpa	DEG
map7d1b	2.89392e-97	-0.347839	0.026	0.124	7.05537e-93	Intermediate_Epithelial_0dpa_vs_1dpa	DEG
tmem54a	3.89346e-97	-0.431212	0.361	0.528	9.49226e-93	Intermediate_Epithelial_0dpa_vs_1dpa	DEG
erap2	4.14748e-97	-0.357586	0.085	0.216	1.01116e-92	Intermediate_Epithelial_0dpa_vs_1dpa	DEG
pabpc1b	4.80514e-97	-0.405706	0.078	0.204	1.17149e-92	Intermediate_Epithelial_0dpa_vs_1dpa	DEG
hnrpkl	5.07497e-97	-0.382764	0.081	0.207	1.23728e-92	Intermediate_Epithelial_0dpa_vs_1dpa	DEG
slc17a9b	6.2052e-97	0.449599	0.185	0.076	1.51283e-92	Intermediate_Epithelial_0dpa_vs_1dpa	DEG
plk2a	6.5478e-97	-0.430524	0.369	0.539	1.59635e-92	Intermediate_Epithelial_0dpa_vs_1dpa	DEG
mycbp2	7.2249e-97	0.470886	0.723	0.659	1.76143e-92	Intermediate_Epithelial_0dpa_vs_1dpa	DEG
ubald1b	8.96935e-97	-0.334775	0.056	0.173	2.18673e-92	Intermediate_Epithelial_0dpa_vs_1dpa	DEG
tmem33	1.06115e-96	-0.367983	0.076	0.2	2.58709e-92	Intermediate_Epithelial_0dpa_vs_1dpa	DEG
glud1a	1.19094e-96	-0.41609	0.305	0.47	2.90352e-92	Intermediate_Epithelial_0dpa_vs_1dpa	DEG
srebf2	1.26948e-96	0.418655	0.249	0.123	3.09498e-92	Intermediate_Epithelial_0dpa_vs_1dpa	DEG
ndufb8	1.53304e-96	-0.410047	0.178	0.33	3.73755e-92	Intermediate_Epithelial_0dpa_vs_1dpa	DEG
slc43a1a	1.93647e-96	0.516098	0.475	0.336	4.72112e-92	Intermediate_Epithelial_0dpa_vs_1dpa	DEG
nfkbiaa	2.26554e-96	-0.514987	0.525	0.668	5.52338e-92	Intermediate_Epithelial_0dpa_vs_1dpa	DEG
rin2	3.03374e-96	-0.478418	0.378	0.541	7.39625e-92	Intermediate_Epithelial_0dpa_vs_1dpa	DEG
ywhabl	3.2758e-96	-0.397451	0.316	0.483	7.9864e-92	Intermediate_Epithelial_0dpa_vs_1dpa	DEG
ezh1	4.08466e-96	0.2951	0.13	0.04	9.9584e-92	Intermediate_Epithelial_0dpa_vs_1dpa	DEG
ubb	4.60084e-96	-0.323662	0.892	0.953	1.12168e-91	Intermediate_Epithelial_0dpa_vs_1dpa	DEG
kcnn4	7.03568e-96	0.48974	0.3	0.164	1.7153e-91	Intermediate_Epithelial_0dpa_vs_1dpa	DEG
plekhm2	7.06667e-96	-0.314363	0.036	0.141	1.72285e-91	Intermediate_Epithelial_0dpa_vs_1dpa	DEG
efna1b	7.69683e-96	0.574513	0.746	0.697	1.87649e-91	Intermediate_Epithelial_0dpa_vs_1dpa	DEG
wdr26b	9.29671e-96	-0.367009	0.09	0.219	2.26654e-91	Intermediate_Epithelial_0dpa_vs_1dpa	DEG
m6pr	1.9543e-95	-0.408261	0.205	0.362	4.76458e-91	Intermediate_Epithelial_0dpa_vs_1dpa	DEG
doc2b	2.21611e-95	0.657033	0.393	0.259	5.40288e-91	Intermediate_Epithelial_0dpa_vs_1dpa	DEG
ankrd50l	2.53608e-95	-0.332996	0.055	0.171	6.18297e-91	Intermediate_Epithelial_0dpa_vs_1dpa	DEG
CR383676.3	2.76101e-95	0.637761	0.484	0.359	6.73135e-91	Intermediate_Epithelial_0dpa_vs_1dpa	DEG
usp9	3.52863e-95	-0.382757	0.378	0.546	8.60281e-91	Intermediate_Epithelial_0dpa_vs_1dpa	DEG
ttyh3a	3.5937e-95	-0.399376	0.192	0.346	8.76143e-91	Intermediate_Epithelial_0dpa_vs_1dpa	DEG
CU655842.1	4.04312e-95	-0.356705	0.051	0.163	9.85712e-91	Intermediate_Epithelial_0dpa_vs_1dpa	DEG
ssr2	4.06783e-95	-0.410205	0.273	0.435	9.91736e-91	Intermediate_Epithelial_0dpa_vs_1dpa	DEG
fbxw4	4.22238e-95	-0.324056	0.043	0.152	1.02942e-90	Intermediate_Epithelial_0dpa_vs_1dpa	DEG
si:ch211-129c21.1	6.86848e-95	0.485191	0.681	0.598	1.67453e-90	Intermediate_Epithelial_0dpa_vs_1dpa	DEG
mgrn1b	7.44102e-95	-0.354254	0.068	0.188	1.81412e-90	Intermediate_Epithelial_0dpa_vs_1dpa	DEG
adrm1	7.47665e-95	-0.367929	0.087	0.214	1.82281e-90	Intermediate_Epithelial_0dpa_vs_1dpa	DEG
tspan18b	7.85513e-95	-0.439794	0.1	0.233	1.91508e-90	Intermediate_Epithelial_0dpa_vs_1dpa	DEG
tmem184a	1.41093e-94	0.444579	0.318	0.18	3.43985e-90	Intermediate_Epithelial_0dpa_vs_1dpa	DEG
calua	1.49908e-94	-0.274516	0.014	0.1	3.65475e-90	Intermediate_Epithelial_0dpa_vs_1dpa	DEG
trpv4	2.29193e-94	-0.40491	0.088	0.216	5.58772e-90	Intermediate_Epithelial_0dpa_vs_1dpa	DEG
rac1a	2.41279e-94	-0.364765	0.339	0.515	5.88239e-90	Intermediate_Epithelial_0dpa_vs_1dpa	DEG
cldna	3.02689e-94	-0.279883	0.947	0.982	7.37955e-90	Intermediate_Epithelial_0dpa_vs_1dpa	DEG
ist1	3.24938e-94	0.443431	0.661	0.564	7.92199e-90	Intermediate_Epithelial_0dpa_vs_1dpa	DEG
acer2	5.08502e-94	-0.306564	0.027	0.125	1.23973e-89	Intermediate_Epithelial_0dpa_vs_1dpa	DEG
btr29	5.35644e-94	-0.265777	0.013	0.1	1.3059e-89	Intermediate_Epithelial_0dpa_vs_1dpa	DEG
fosl2	5.73782e-94	0.493096	0.705	0.619	1.39888e-89	Intermediate_Epithelial_0dpa_vs_1dpa	DEG
psma6a	6.38032e-94	-0.337979	0.047	0.156	1.55552e-89	Intermediate_Epithelial_0dpa_vs_1dpa	DEG
sp9	6.43773e-94	-0.377824	0.125	0.266	1.56952e-89	Intermediate_Epithelial_0dpa_vs_1dpa	DEG
oclnb	6.6135e-94	0.531879	0.607	0.494	1.61237e-89	Intermediate_Epithelial_0dpa_vs_1dpa	DEG
atp8b1	7.21707e-94	-0.339211	0.466	0.644	1.75952e-89	Intermediate_Epithelial_0dpa_vs_1dpa	DEG
cand1	8.67277e-94	-0.353242	0.098	0.229	2.11442e-89	Intermediate_Epithelial_0dpa_vs_1dpa	DEG
slc9a2	9.25579e-94	0.401924	0.213	0.097	2.25656e-89	Intermediate_Epithelial_0dpa_vs_1dpa	DEG
si:dkeyp-97a10.1	1.01926e-93	0.453983	0.178	0.073	2.48495e-89	Intermediate_Epithelial_0dpa_vs_1dpa	DEG
pkp1a	1.32552e-93	0.281176	0.11	0.03	3.23162e-89	Intermediate_Epithelial_0dpa_vs_1dpa	DEG
sgip1b	1.33204e-93	0.409006	0.164	0.063	3.24752e-89	Intermediate_Epithelial_0dpa_vs_1dpa	DEG
xpr1b	1.37496e-93	-0.398964	0.262	0.427	3.35216e-89	Intermediate_Epithelial_0dpa_vs_1dpa	DEG
atp6v1e1b	1.80163e-93	-0.318218	0.045	0.155	4.39237e-89	Intermediate_Epithelial_0dpa_vs_1dpa	DEG
fcho2	1.90138e-93	-0.412262	0.422	0.591	4.63556e-89	Intermediate_Epithelial_0dpa_vs_1dpa	DEG
camk2b1	2.03942e-93	0.312665	0.119	0.035	4.9721e-89	Intermediate_Epithelial_0dpa_vs_1dpa	DEG
reck	3.85156e-93	-0.368149	0.101	0.232	9.39009e-89	Intermediate_Epithelial_0dpa_vs_1dpa	DEG
gnb4b	5.39082e-93	-0.445986	0.154	0.295	1.31428e-88	Intermediate_Epithelial_0dpa_vs_1dpa	DEG
parga	6.99934e-93	-0.354862	0.074	0.196	1.70644e-88	Intermediate_Epithelial_0dpa_vs_1dpa	DEG
ms4a17a.5	7.89741e-93	0.48474	0.272	0.146	1.92539e-88	Intermediate_Epithelial_0dpa_vs_1dpa	DEG
gramd1a	1.02227e-92	-0.358649	0.085	0.211	2.49228e-88	Intermediate_Epithelial_0dpa_vs_1dpa	DEG
clcn5b	1.0852e-92	0.684709	0.274	0.151	2.64572e-88	Intermediate_Epithelial_0dpa_vs_1dpa	DEG
il4r.1	1.47071e-92	0.464387	0.332	0.196	3.58559e-88	Intermediate_Epithelial_0dpa_vs_1dpa	DEG
mboat1	3.35045e-92	0.513375	0.553	0.429	8.1684e-88	Intermediate_Epithelial_0dpa_vs_1dpa	DEG
zgc:114041	3.35947e-92	-0.398406	0.063	0.178	8.19038e-88	Intermediate_Epithelial_0dpa_vs_1dpa	DEG
eea1	4.08448e-92	-0.32486	0.07	0.19	9.95796e-88	Intermediate_Epithelial_0dpa_vs_1dpa	DEG
tet3	4.10883e-92	-0.34461	0.056	0.169	1.00173e-87	Intermediate_Epithelial_0dpa_vs_1dpa	DEG
actr2a	4.32702e-92	-0.388526	0.159	0.303	1.05493e-87	Intermediate_Epithelial_0dpa_vs_1dpa	DEG
si:dkey-188i13.9	4.51099e-92	-0.478926	0.071	0.19	1.09978e-87	Intermediate_Epithelial_0dpa_vs_1dpa	DEG
slc26a2	4.99367e-92	0.322064	0.133	0.044	1.21746e-87	Intermediate_Epithelial_0dpa_vs_1dpa	DEG
arl5c	5.71465e-92	0.473601	0.387	0.246	1.39323e-87	Intermediate_Epithelial_0dpa_vs_1dpa	DEG
zfand5b	5.74665e-92	0.545882	0.574	0.468	1.40103e-87	Intermediate_Epithelial_0dpa_vs_1dpa	DEG
zgc:152830	7.00851e-92	-0.291365	0.032	0.132	1.70867e-87	Intermediate_Epithelial_0dpa_vs_1dpa	DEG
pgrmc1	1.11007e-91	-0.364739	0.117	0.251	2.70634e-87	Intermediate_Epithelial_0dpa_vs_1dpa	DEG
psmb10	1.50774e-91	-0.37789	0.092	0.218	3.67588e-87	Intermediate_Epithelial_0dpa_vs_1dpa	DEG
si:ch211-222l21.1	2.12988e-91	-0.472098	0.188	0.337	5.19265e-87	Intermediate_Epithelial_0dpa_vs_1dpa	DEG
cpvl	2.62196e-91	-0.334924	0.057	0.169	6.39235e-87	Intermediate_Epithelial_0dpa_vs_1dpa	DEG
baz1a	3.79221e-91	0.496652	0.372	0.237	9.2454e-87	Intermediate_Epithelial_0dpa_vs_1dpa	DEG
sept9a	6.37947e-91	0.591005	0.363	0.229	1.55531e-86	Intermediate_Epithelial_0dpa_vs_1dpa	DEG
slc4a2b	1.25432e-90	0.429812	0.255	0.131	3.05802e-86	Intermediate_Epithelial_0dpa_vs_1dpa	DEG
znf296	1.50895e-90	-0.409843	0.177	0.323	3.67881e-86	Intermediate_Epithelial_0dpa_vs_1dpa	DEG
CABZ01115113.1	2.41149e-90	-0.312151	0.04	0.143	5.87921e-86	Intermediate_Epithelial_0dpa_vs_1dpa	DEG
sorl1	2.93441e-90	0.4903	0.411	0.273	7.15408e-86	Intermediate_Epithelial_0dpa_vs_1dpa	DEG
asap2a	3.51968e-90	-0.299728	0.017	0.104	8.58099e-86	Intermediate_Epithelial_0dpa_vs_1dpa	DEG
capn2b	3.53209e-90	0.450915	0.527	0.394	8.61124e-86	Intermediate_Epithelial_0dpa_vs_1dpa	DEG
pho	4.46616e-90	0.510508	0.253	0.13	1.08885e-85	Intermediate_Epithelial_0dpa_vs_1dpa	DEG
nr1i2	5.96638e-90	0.483291	0.336	0.199	1.4546e-85	Intermediate_Epithelial_0dpa_vs_1dpa	DEG
abcf2a	6.14124e-90	0.469367	0.42	0.286	1.49724e-85	Intermediate_Epithelial_0dpa_vs_1dpa	DEG
si:ch211-107n13.1	6.63993e-90	-0.315412	0.033	0.131	1.61881e-85	Intermediate_Epithelial_0dpa_vs_1dpa	DEG
smyd3	1.0179e-89	0.445659	0.149	0.055	2.48163e-85	Intermediate_Epithelial_0dpa_vs_1dpa	DEG
cnga2b	1.18953e-89	0.508375	0.229	0.112	2.90007e-85	Intermediate_Epithelial_0dpa_vs_1dpa	DEG
cers2a	1.9082e-89	0.558827	0.483	0.366	4.65218e-85	Intermediate_Epithelial_0dpa_vs_1dpa	DEG
nckap5l	1.96501e-89	-0.297538	0.032	0.13	4.7907e-85	Intermediate_Epithelial_0dpa_vs_1dpa	DEG
timmdc1	2.11999e-89	-0.337075	0.071	0.189	5.16853e-85	Intermediate_Epithelial_0dpa_vs_1dpa	DEG
mcm3	2.24782e-89	0.260922	0.117	0.035	5.48019e-85	Intermediate_Epithelial_0dpa_vs_1dpa	DEG
pcsk6	2.89728e-89	0.467357	0.285	0.158	7.06356e-85	Intermediate_Epithelial_0dpa_vs_1dpa	DEG
cox6b1	2.90653e-89	-0.303526	0.036	0.137	7.08612e-85	Intermediate_Epithelial_0dpa_vs_1dpa	DEG
rps27l	3.347e-89	-0.417182	0.191	0.339	8.15998e-85	Intermediate_Epithelial_0dpa_vs_1dpa	DEG
rgl3a	3.92102e-89	0.420734	0.235	0.113	9.55944e-85	Intermediate_Epithelial_0dpa_vs_1dpa	DEG
atp5mc3a	6.05859e-89	-0.381627	0.179	0.327	1.47708e-84	Intermediate_Epithelial_0dpa_vs_1dpa	DEG
ddx61	6.09664e-89	-0.391858	0.413	0.577	1.48636e-84	Intermediate_Epithelial_0dpa_vs_1dpa	DEG
tmprss13b	1.20661e-88	0.587938	0.486	0.356	2.94171e-84	Intermediate_Epithelial_0dpa_vs_1dpa	DEG
bop1	1.43811e-88	0.347905	0.155	0.059	3.50611e-84	Intermediate_Epithelial_0dpa_vs_1dpa	DEG
zgc:162200	1.65257e-88	-0.304526	0.044	0.148	4.02896e-84	Intermediate_Epithelial_0dpa_vs_1dpa	DEG
prkceb	1.73814e-88	-0.407654	0.271	0.429	4.23758e-84	Intermediate_Epithelial_0dpa_vs_1dpa	DEG
uqcrh	2.16647e-88	-0.376098	0.12	0.253	5.28185e-84	Intermediate_Epithelial_0dpa_vs_1dpa	DEG
si:ch211-105j21.9	2.1946e-88	-0.405513	0.271	0.429	5.35043e-84	Intermediate_Epithelial_0dpa_vs_1dpa	DEG
trappc1	2.57824e-88	-0.311481	0.051	0.158	6.28576e-84	Intermediate_Epithelial_0dpa_vs_1dpa	DEG
rsrc2	2.78273e-88	-0.318577	0.067	0.181	6.7843e-84	Intermediate_Epithelial_0dpa_vs_1dpa	DEG
rab11al	3.87803e-88	0.45418	0.293	0.165	9.45464e-84	Intermediate_Epithelial_0dpa_vs_1dpa	DEG
hnrnpaba	4.94636e-88	-0.402685	0.405	0.56	1.20592e-83	Intermediate_Epithelial_0dpa_vs_1dpa	DEG
uchl3	5.37889e-88	-0.315635	0.047	0.151	1.31137e-83	Intermediate_Epithelial_0dpa_vs_1dpa	DEG
glyctk	1.20319e-87	-0.288855	0.028	0.121	2.93339e-83	Intermediate_Epithelial_0dpa_vs_1dpa	DEG
scrib	1.2491e-87	0.513459	0.351	0.219	3.0453e-83	Intermediate_Epithelial_0dpa_vs_1dpa	DEG
ap2m1a	1.34203e-87	-0.346631	0.128	0.262	3.27187e-83	Intermediate_Epithelial_0dpa_vs_1dpa	DEG
CU856539.2	1.66198e-87	0.72238	0.45	0.328	4.0519e-83	Intermediate_Epithelial_0dpa_vs_1dpa	DEG
rcc2	1.94497e-87	-0.370861	0.15	0.289	4.74183e-83	Intermediate_Epithelial_0dpa_vs_1dpa	DEG
inpp5f	2.01674e-87	0.380358	0.211	0.099	4.91682e-83	Intermediate_Epithelial_0dpa_vs_1dpa	DEG
skilb	3.09223e-87	0.370686	0.192	0.085	7.53886e-83	Intermediate_Epithelial_0dpa_vs_1dpa	DEG
scrn3	3.21399e-87	-0.307034	0.034	0.131	7.83572e-83	Intermediate_Epithelial_0dpa_vs_1dpa	DEG
emc1	3.29337e-87	-0.313446	0.055	0.163	8.02923e-83	Intermediate_Epithelial_0dpa_vs_1dpa	DEG
si:dkey-45k15.1	4.09074e-87	-0.313158	0.04	0.139	9.97322e-83	Intermediate_Epithelial_0dpa_vs_1dpa	DEG
eif4ebp1	4.1687e-87	-0.355928	0.091	0.213	1.01633e-82	Intermediate_Epithelial_0dpa_vs_1dpa	DEG
gas2l1	6.40317e-87	-0.314238	0.311	0.482	1.56109e-82	Intermediate_Epithelial_0dpa_vs_1dpa	DEG
si:dkey-28b4.7	7.62082e-87	-0.320253	0.05	0.155	1.85796e-82	Intermediate_Epithelial_0dpa_vs_1dpa	DEG
prkag2b	7.95933e-87	0.349042	0.14	0.05	1.94048e-82	Intermediate_Epithelial_0dpa_vs_1dpa	DEG
col1a2	8.81533e-87	-0.51045	0.062	0.171	2.14918e-82	Intermediate_Epithelial_0dpa_vs_1dpa	DEG
stau2	1.24746e-86	-0.36448	0.207	0.358	3.0413e-82	Intermediate_Epithelial_0dpa_vs_1dpa	DEG
thy1	1.29362e-86	0.498735	0.711	0.641	3.15384e-82	Intermediate_Epithelial_0dpa_vs_1dpa	DEG
trpm4b.2	1.42191e-86	-0.373365	0.473	0.63	3.46661e-82	Intermediate_Epithelial_0dpa_vs_1dpa	DEG
pld1a	1.42498e-86	-0.375462	0.664	0.781	3.4741e-82	Intermediate_Epithelial_0dpa_vs_1dpa	DEG
etf1b	1.56134e-86	0.49009	0.483	0.36	3.80655e-82	Intermediate_Epithelial_0dpa_vs_1dpa	DEG
arhgap27l	1.6286e-86	-0.404739	0.211	0.358	3.97053e-82	Intermediate_Epithelial_0dpa_vs_1dpa	DEG
mrtfba	1.69086e-86	-0.343138	0.084	0.204	4.12232e-82	Intermediate_Epithelial_0dpa_vs_1dpa	DEG
slc35a2	2.85168e-86	0.347923	0.189	0.084	6.9524e-82	Intermediate_Epithelial_0dpa_vs_1dpa	DEG
tle3a	3.62032e-86	0.415127	0.231	0.116	8.82634e-82	Intermediate_Epithelial_0dpa_vs_1dpa	DEG
wbp1lb	4.25275e-86	0.474832	0.302	0.174	1.03682e-81	Intermediate_Epithelial_0dpa_vs_1dpa	DEG
mpdu1b	5.5019e-86	-0.29454	0.055	0.163	1.34136e-81	Intermediate_Epithelial_0dpa_vs_1dpa	DEG
snx3	6.68796e-86	-0.336359	0.091	0.212	1.63053e-81	Intermediate_Epithelial_0dpa_vs_1dpa	DEG
nampta	7.24604e-86	0.403349	0.207	0.097	1.76658e-81	Intermediate_Epithelial_0dpa_vs_1dpa	DEG
ppp2r3a	7.84007e-86	0.446834	0.216	0.103	1.91141e-81	Intermediate_Epithelial_0dpa_vs_1dpa	DEG
pafah1b1a	9.13959e-86	-0.312245	0.067	0.18	2.22823e-81	Intermediate_Epithelial_0dpa_vs_1dpa	DEG
gpr158b	1.07013e-85	0.313655	0.133	0.046	2.60897e-81	Intermediate_Epithelial_0dpa_vs_1dpa	DEG
bsdc1	1.61681e-85	-0.351875	0.097	0.22	3.94178e-81	Intermediate_Epithelial_0dpa_vs_1dpa	DEG
tapbp.1	1.78635e-85	-0.38745	0.101	0.226	4.35512e-81	Intermediate_Epithelial_0dpa_vs_1dpa	DEG
myo18ab	1.90442e-85	0.512091	0.279	0.157	4.64296e-81	Intermediate_Epithelial_0dpa_vs_1dpa	DEG
oga	2.48217e-85	-0.353577	0.083	0.201	6.05152e-81	Intermediate_Epithelial_0dpa_vs_1dpa	DEG
atox1	2.59392e-85	-0.268416	0.024	0.112	6.32397e-81	Intermediate_Epithelial_0dpa_vs_1dpa	DEG
gprc5c	3.27583e-85	-0.368133	0.417	0.579	7.98647e-81	Intermediate_Epithelial_0dpa_vs_1dpa	DEG
nr1d4b	3.34881e-85	-0.39641	0.057	0.164	8.16439e-81	Intermediate_Epithelial_0dpa_vs_1dpa	DEG
AL732488.2	3.65178e-85	0.44656	0.32	0.191	8.90305e-81	Intermediate_Epithelial_0dpa_vs_1dpa	DEG
gpx4b	4.23966e-85	-0.340461	0.077	0.193	1.03363e-80	Intermediate_Epithelial_0dpa_vs_1dpa	DEG
rnaset2	4.33419e-85	-0.38457	0.205	0.351	1.05668e-80	Intermediate_Epithelial_0dpa_vs_1dpa	DEG
dym	5.77718e-85	0.422148	0.255	0.136	1.40848e-80	Intermediate_Epithelial_0dpa_vs_1dpa	DEG
hdac1	7.04493e-85	-0.378677	0.161	0.299	1.71756e-80	Intermediate_Epithelial_0dpa_vs_1dpa	DEG
rpl4	7.11863e-85	0.41461	0.793	0.756	1.73552e-80	Intermediate_Epithelial_0dpa_vs_1dpa	DEG
snrnp200	7.21082e-85	-0.364642	0.121	0.25	1.758e-80	Intermediate_Epithelial_0dpa_vs_1dpa	DEG
ARF5	8.06484e-85	0.463734	0.339	0.209	1.96621e-80	Intermediate_Epithelial_0dpa_vs_1dpa	DEG
hsp90aa1.2	1.01852e-84	-0.380095	0.18	0.325	2.48315e-80	Intermediate_Epithelial_0dpa_vs_1dpa	DEG
cltcb	1.50233e-84	-0.363411	0.18	0.324	3.66269e-80	Intermediate_Epithelial_0dpa_vs_1dpa	DEG
CR387919.1	1.65306e-84	0.530961	0.27	0.15	4.03017e-80	Intermediate_Epithelial_0dpa_vs_1dpa	DEG
si:dkey-21a6.5	1.71335e-84	0.397501	0.209	0.1	4.17716e-80	Intermediate_Epithelial_0dpa_vs_1dpa	DEG
pprc1	2.15038e-84	0.382165	0.197	0.09	5.24263e-80	Intermediate_Epithelial_0dpa_vs_1dpa	DEG
rab27a	2.65531e-84	0.423242	0.23	0.116	6.47365e-80	Intermediate_Epithelial_0dpa_vs_1dpa	DEG
agap3	3.86705e-84	0.427096	0.702	0.616	9.42786e-80	Intermediate_Epithelial_0dpa_vs_1dpa	DEG
dgkzb	4.09048e-84	0.365316	0.169	0.07	9.97258e-80	Intermediate_Epithelial_0dpa_vs_1dpa	DEG
pes	4.18559e-84	0.373582	0.209	0.1	1.02045e-79	Intermediate_Epithelial_0dpa_vs_1dpa	DEG
atp5f1d	4.263e-84	-0.382036	0.169	0.308	1.03932e-79	Intermediate_Epithelial_0dpa_vs_1dpa	DEG
serpinb1l1	4.66537e-84	-0.281682	0.033	0.127	1.13742e-79	Intermediate_Epithelial_0dpa_vs_1dpa	DEG
boka	5.06759e-84	-0.367383	0.077	0.191	1.23548e-79	Intermediate_Epithelial_0dpa_vs_1dpa	DEG
cnih1	5.19854e-84	-0.331161	0.097	0.219	1.2674e-79	Intermediate_Epithelial_0dpa_vs_1dpa	DEG
dtnbp1a	5.37902e-84	-0.309119	0.05	0.154	1.3114e-79	Intermediate_Epithelial_0dpa_vs_1dpa	DEG
osbpl9	5.59297e-84	0.663075	0.444	0.331	1.36357e-79	Intermediate_Epithelial_0dpa_vs_1dpa	DEG
chd2	5.96859e-84	0.536903	0.4	0.271	1.45514e-79	Intermediate_Epithelial_0dpa_vs_1dpa	DEG
ap1m2	8.73942e-84	0.449449	0.226	0.115	2.13067e-79	Intermediate_Epithelial_0dpa_vs_1dpa	DEG
endouc	1.14429e-83	0.378946	0.206	0.098	2.78978e-79	Intermediate_Epithelial_0dpa_vs_1dpa	DEG
wdr75	1.35575e-83	0.297187	0.132	0.046	3.30532e-79	Intermediate_Epithelial_0dpa_vs_1dpa	DEG
map4k5	1.68034e-83	-0.382904	0.162	0.298	4.09667e-79	Intermediate_Epithelial_0dpa_vs_1dpa	DEG
ranbp10	1.72804e-83	-0.322347	0.048	0.149	4.21296e-79	Intermediate_Epithelial_0dpa_vs_1dpa	DEG
skp1	1.90819e-83	-0.382868	0.208	0.354	4.65216e-79	Intermediate_Epithelial_0dpa_vs_1dpa	DEG
atp5pf	2.48964e-83	-0.393674	0.278	0.431	6.06973e-79	Intermediate_Epithelial_0dpa_vs_1dpa	DEG
zmpste24	2.84235e-83	-0.293099	0.051	0.154	6.92964e-79	Intermediate_Epithelial_0dpa_vs_1dpa	DEG
usp47	3.24559e-83	-0.369094	0.147	0.281	7.91275e-79	Intermediate_Epithelial_0dpa_vs_1dpa	DEG
nlrc3	3.58525e-83	0.268402	0.116	0.037	8.74083e-79	Intermediate_Epithelial_0dpa_vs_1dpa	DEG
tm9sf2	3.6724e-83	-0.321769	0.572	0.725	8.95331e-79	Intermediate_Epithelial_0dpa_vs_1dpa	DEG
gorasp2	3.79289e-83	-0.366023	0.15	0.283	9.24708e-79	Intermediate_Epithelial_0dpa_vs_1dpa	DEG
nars1	4.15344e-83	-0.338684	0.094	0.214	1.01261e-78	Intermediate_Epithelial_0dpa_vs_1dpa	DEG
huwe1	4.59731e-83	-0.36963	0.279	0.433	1.12082e-78	Intermediate_Epithelial_0dpa_vs_1dpa	DEG
ca2	4.83489e-83	-0.369103	0.182	0.324	1.17875e-78	Intermediate_Epithelial_0dpa_vs_1dpa	DEG
ddx39ab	5.52374e-83	-0.349075	0.119	0.246	1.34669e-78	Intermediate_Epithelial_0dpa_vs_1dpa	DEG
lman2	7.70384e-83	-0.362054	0.156	0.293	1.8782e-78	Intermediate_Epithelial_0dpa_vs_1dpa	DEG
atp5f1c	8.74239e-83	-0.366293	0.143	0.277	2.13139e-78	Intermediate_Epithelial_0dpa_vs_1dpa	DEG
si:dkeyp-67a8.4.1	9.44605e-83	0.40133	0.273	0.15	2.30295e-78	Intermediate_Epithelial_0dpa_vs_1dpa	DEG
hsd3b7	9.72643e-83	0.66563	0.389	0.266	2.3713e-78	Intermediate_Epithelial_0dpa_vs_1dpa	DEG
pvrl2l	9.93148e-83	0.622336	0.52	0.413	2.42129e-78	Intermediate_Epithelial_0dpa_vs_1dpa	DEG
fxyd1	1.50554e-82	-0.326313	0.642	0.774	3.6705e-78	Intermediate_Epithelial_0dpa_vs_1dpa	DEG
nucks1a	1.51569e-82	-0.355964	0.111	0.235	3.69526e-78	Intermediate_Epithelial_0dpa_vs_1dpa	DEG
ATP11B	1.71579e-82	-0.390848	0.133	0.261	4.1831e-78	Intermediate_Epithelial_0dpa_vs_1dpa	DEG
fam20ca	2.09989e-82	0.302168	0.125	0.042	5.11954e-78	Intermediate_Epithelial_0dpa_vs_1dpa	DEG
tmed9	2.27975e-82	-0.372151	0.283	0.438	5.55803e-78	Intermediate_Epithelial_0dpa_vs_1dpa	DEG
si:ch73-212j7.3	2.37269e-82	0.359989	0.217	0.106	5.78461e-78	Intermediate_Epithelial_0dpa_vs_1dpa	DEG
ano9b	2.84212e-82	-0.369686	0.477	0.631	6.92908e-78	Intermediate_Epithelial_0dpa_vs_1dpa	DEG
plcb3	2.87271e-82	-0.388876	0.404	0.556	7.00367e-78	Intermediate_Epithelial_0dpa_vs_1dpa	DEG
mid2	3.01571e-82	0.540966	0.235	0.121	7.3523e-78	Intermediate_Epithelial_0dpa_vs_1dpa	DEG
hs2st1b	3.55667e-82	0.432604	0.15	0.059	8.67116e-78	Intermediate_Epithelial_0dpa_vs_1dpa	DEG
id1	4.31234e-82	-0.398411	0.269	0.416	1.05135e-77	Intermediate_Epithelial_0dpa_vs_1dpa	DEG
atf3	4.7566e-82	0.597498	0.392	0.257	1.15966e-77	Intermediate_Epithelial_0dpa_vs_1dpa	DEG
mllt10	6.838e-82	0.479651	0.437	0.311	1.6671e-77	Intermediate_Epithelial_0dpa_vs_1dpa	DEG
banf1	6.89227e-82	-0.371812	0.112	0.235	1.68033e-77	Intermediate_Epithelial_0dpa_vs_1dpa	DEG
rpl31	8.24441e-82	0.352745	0.915	0.909	2.00999e-77	Intermediate_Epithelial_0dpa_vs_1dpa	DEG
ern2	1.1404e-81	0.29968	0.14	0.052	2.7803e-77	Intermediate_Epithelial_0dpa_vs_1dpa	DEG
si:dkey-42i9.6	1.25016e-81	-0.317063	0.574	0.733	3.04789e-77	Intermediate_Epithelial_0dpa_vs_1dpa	DEG
dkc1	1.35777e-81	0.344745	0.197	0.091	3.31025e-77	Intermediate_Epithelial_0dpa_vs_1dpa	DEG
tap2a	1.39914e-81	-0.347871	0.059	0.163	3.41111e-77	Intermediate_Epithelial_0dpa_vs_1dpa	DEG
hsd17b12b	1.56315e-81	-0.295958	0.059	0.164	3.81097e-77	Intermediate_Epithelial_0dpa_vs_1dpa	DEG
add3a	1.57082e-81	-0.402714	0.176	0.312	3.82965e-77	Intermediate_Epithelial_0dpa_vs_1dpa	DEG
eml3	1.78897e-81	-0.317149	0.125	0.255	4.3615e-77	Intermediate_Epithelial_0dpa_vs_1dpa	DEG
hsdl2	2.40993e-81	-0.296119	0.055	0.159	5.87541e-77	Intermediate_Epithelial_0dpa_vs_1dpa	DEG
gfpt1	2.61312e-81	0.55967	0.4	0.273	6.37079e-77	Intermediate_Epithelial_0dpa_vs_1dpa	DEG
ubl3a	2.88797e-81	0.530877	0.52	0.401	7.04088e-77	Intermediate_Epithelial_0dpa_vs_1dpa	DEG
serinc1	2.93537e-81	-0.382553	0.314	0.468	7.15643e-77	Intermediate_Epithelial_0dpa_vs_1dpa	DEG
crfb16	3.67551e-81	0.352076	0.182	0.081	8.9609e-77	Intermediate_Epithelial_0dpa_vs_1dpa	DEG
rb1cc1	3.91531e-81	-0.384085	0.209	0.353	9.54553e-77	Intermediate_Epithelial_0dpa_vs_1dpa	DEG
slc25a42	4.06025e-81	0.336973	0.178	0.079	9.89889e-77	Intermediate_Epithelial_0dpa_vs_1dpa	DEG
ctnnb2	4.2369e-81	-0.404037	0.269	0.412	1.03296e-76	Intermediate_Epithelial_0dpa_vs_1dpa	DEG
atp1b3a	5.30122e-81	0.288459	0.156	0.063	1.29244e-76	Intermediate_Epithelial_0dpa_vs_1dpa	DEG
ctss2.2	6.30428e-81	-0.407423	0.232	0.378	1.53698e-76	Intermediate_Epithelial_0dpa_vs_1dpa	DEG
ssuh2.2	7.27339e-81	-0.343898	0.055	0.157	1.77325e-76	Intermediate_Epithelial_0dpa_vs_1dpa	DEG
magt1	9.33212e-81	-0.37029	0.158	0.29	2.27517e-76	Intermediate_Epithelial_0dpa_vs_1dpa	DEG
anxa11b	9.42288e-81	-0.372512	0.323	0.478	2.2973e-76	Intermediate_Epithelial_0dpa_vs_1dpa	DEG
suclg1	9.48776e-81	-0.342123	0.093	0.211	2.31312e-76	Intermediate_Epithelial_0dpa_vs_1dpa	DEG
tagln2	9.79385e-81	-0.396644	0.575	0.717	2.38774e-76	Intermediate_Epithelial_0dpa_vs_1dpa	DEG
eef2a.1	1.01539e-80	0.342175	0.189	0.086	2.47551e-76	Intermediate_Epithelial_0dpa_vs_1dpa	DEG
tjp1b	1.69856e-80	0.591384	0.659	0.597	4.14108e-76	Intermediate_Epithelial_0dpa_vs_1dpa	DEG
sucla2	1.71528e-80	-0.300484	0.058	0.162	4.18186e-76	Intermediate_Epithelial_0dpa_vs_1dpa	DEG
mif	1.81139e-80	-0.324439	0.061	0.166	4.41617e-76	Intermediate_Epithelial_0dpa_vs_1dpa	DEG
hspa4b	1.98953e-80	-0.340592	0.098	0.216	4.85047e-76	Intermediate_Epithelial_0dpa_vs_1dpa	DEG
selenop	2.46325e-80	0.27002	0.106	0.032	6.0054e-76	Intermediate_Epithelial_0dpa_vs_1dpa	DEG
exoc2	2.55694e-80	-0.308432	0.055	0.157	6.23382e-76	Intermediate_Epithelial_0dpa_vs_1dpa	DEG
fbxw11a	2.66572e-80	-0.325291	0.068	0.177	6.49902e-76	Intermediate_Epithelial_0dpa_vs_1dpa	DEG
lsm6	2.9317e-80	-0.313532	0.051	0.152	7.14747e-76	Intermediate_Epithelial_0dpa_vs_1dpa	DEG
erlin1	3.63041e-80	-0.353432	0.129	0.256	8.85095e-76	Intermediate_Epithelial_0dpa_vs_1dpa	DEG
tmem127	4.60725e-80	0.443649	0.293	0.171	1.12325e-75	Intermediate_Epithelial_0dpa_vs_1dpa	DEG
kidins220b	5.59391e-80	0.421189	0.297	0.172	1.3638e-75	Intermediate_Epithelial_0dpa_vs_1dpa	DEG
tdh	6.16708e-80	0.459956	0.403	0.276	1.50354e-75	Intermediate_Epithelial_0dpa_vs_1dpa	DEG
hmgn6	6.66879e-80	-0.361435	0.145	0.274	1.62585e-75	Intermediate_Epithelial_0dpa_vs_1dpa	DEG
slc30a7	7.02469e-80	-0.36049	0.162	0.298	1.71262e-75	Intermediate_Epithelial_0dpa_vs_1dpa	DEG
per2	1.0757e-79	0.381385	0.789	0.743	2.62255e-75	Intermediate_Epithelial_0dpa_vs_1dpa	DEG
wnk1a	1.07748e-79	0.435784	0.687	0.626	2.62689e-75	Intermediate_Epithelial_0dpa_vs_1dpa	DEG
trim16	1.22283e-79	0.653376	0.677	0.637	2.98126e-75	Intermediate_Epithelial_0dpa_vs_1dpa	DEG
caprin1b	2.58568e-79	0.4189	0.309	0.187	6.30388e-75	Intermediate_Epithelial_0dpa_vs_1dpa	DEG
bhlhe40	3.72805e-79	-0.415543	0.392	0.54	9.089e-75	Intermediate_Epithelial_0dpa_vs_1dpa	DEG
lamp2	3.75151e-79	-0.369545	0.43	0.577	9.14617e-75	Intermediate_Epithelial_0dpa_vs_1dpa	DEG
parp3	3.77886e-79	-0.267369	0.028	0.115	9.21286e-75	Intermediate_Epithelial_0dpa_vs_1dpa	DEG
zfand3	3.96038e-79	-0.329386	0.108	0.229	9.6554e-75	Intermediate_Epithelial_0dpa_vs_1dpa	DEG
tanc1b	4.13616e-79	-0.438065	0.569	0.7	1.00839e-74	Intermediate_Epithelial_0dpa_vs_1dpa	DEG
cdkn1bb	4.34636e-79	-0.394614	0.369	0.517	1.05964e-74	Intermediate_Epithelial_0dpa_vs_1dpa	DEG
specc1lb	5.3236e-79	0.354914	0.178	0.08	1.29789e-74	Intermediate_Epithelial_0dpa_vs_1dpa	DEG
ndfip1l	6.1707e-79	-0.36066	0.244	0.39	1.50442e-74	Intermediate_Epithelial_0dpa_vs_1dpa	DEG
kdelr2b	6.47856e-79	-0.3539	0.169	0.305	1.57947e-74	Intermediate_Epithelial_0dpa_vs_1dpa	DEG
cica	6.64013e-79	-0.377403	0.185	0.32	1.61886e-74	Intermediate_Epithelial_0dpa_vs_1dpa	DEG
chchd3a	7.93937e-79	0.315032	0.14	0.053	1.93562e-74	Intermediate_Epithelial_0dpa_vs_1dpa	DEG
pim2	1.06871e-78	-0.538017	0.253	0.386	2.60552e-74	Intermediate_Epithelial_0dpa_vs_1dpa	DEG
ube3c	1.23664e-78	-0.306589	0.085	0.198	3.01492e-74	Intermediate_Epithelial_0dpa_vs_1dpa	DEG
smim15	1.26953e-78	-0.329387	0.084	0.197	3.09511e-74	Intermediate_Epithelial_0dpa_vs_1dpa	DEG
rps26l	1.42115e-78	0.367183	0.874	0.865	3.46476e-74	Intermediate_Epithelial_0dpa_vs_1dpa	DEG
mfsd13a	2.00208e-78	0.364032	0.213	0.106	4.88108e-74	Intermediate_Epithelial_0dpa_vs_1dpa	DEG
si:ch211-132g1.3	2.08472e-78	-0.369003	0.239	0.384	5.08255e-74	Intermediate_Epithelial_0dpa_vs_1dpa	DEG
dmrt1	2.65466e-78	0.477412	0.202	0.098	6.47205e-74	Intermediate_Epithelial_0dpa_vs_1dpa	DEG
ptgs2b	2.9953e-78	0.763096	0.4	0.283	7.30254e-74	Intermediate_Epithelial_0dpa_vs_1dpa	DEG
rpl29	5.60031e-78	0.399681	0.779	0.74	1.36535e-73	Intermediate_Epithelial_0dpa_vs_1dpa	DEG
cdh26.1	6.16527e-78	0.461831	0.29	0.168	1.50309e-73	Intermediate_Epithelial_0dpa_vs_1dpa	DEG
tmtc1	6.68292e-78	0.313543	0.113	0.037	1.6293e-73	Intermediate_Epithelial_0dpa_vs_1dpa	DEG
taok3a	8.0356e-78	0.428182	0.189	0.089	1.95908e-73	Intermediate_Epithelial_0dpa_vs_1dpa	DEG
traf4b	1.33981e-77	-0.347174	0.15	0.282	3.26645e-73	Intermediate_Epithelial_0dpa_vs_1dpa	DEG
efna5a	1.75888e-77	-0.28918	0.431	0.594	4.28815e-73	Intermediate_Epithelial_0dpa_vs_1dpa	DEG
serp1	2.16644e-77	0.425774	0.385	0.259	5.28179e-73	Intermediate_Epithelial_0dpa_vs_1dpa	DEG
tjp2a	2.35985e-77	0.474915	0.567	0.474	5.75331e-73	Intermediate_Epithelial_0dpa_vs_1dpa	DEG
rnf111	4.77353e-77	0.434183	0.554	0.449	1.16379e-72	Intermediate_Epithelial_0dpa_vs_1dpa	DEG
ube2d2l	4.86016e-77	0.503079	0.534	0.436	1.18491e-72	Intermediate_Epithelial_0dpa_vs_1dpa	DEG
mhc1uba	5.13425e-77	-0.379572	0.966	0.983	1.25173e-72	Intermediate_Epithelial_0dpa_vs_1dpa	DEG
rnf169	5.36784e-77	-0.327854	0.089	0.202	1.30868e-72	Intermediate_Epithelial_0dpa_vs_1dpa	DEG
rpl30	6.22706e-77	0.359237	0.854	0.834	1.51816e-72	Intermediate_Epithelial_0dpa_vs_1dpa	DEG
ptpn13	6.26869e-77	0.741691	0.611	0.562	1.52831e-72	Intermediate_Epithelial_0dpa_vs_1dpa	DEG
gpr156	7.08936e-77	0.590099	0.143	0.058	1.72839e-72	Intermediate_Epithelial_0dpa_vs_1dpa	DEG
dennd5b	7.38858e-77	-0.327882	0.139	0.268	1.80133e-72	Intermediate_Epithelial_0dpa_vs_1dpa	DEG
ppp2r1bb	8.4615e-77	-0.324838	0.083	0.194	2.06291e-72	Intermediate_Epithelial_0dpa_vs_1dpa	DEG
pdk3b	8.87129e-77	-0.349142	0.206	0.346	2.16282e-72	Intermediate_Epithelial_0dpa_vs_1dpa	DEG
erbb3a	9.5522e-77	-0.275257	0.546	0.717	2.32883e-72	Intermediate_Epithelial_0dpa_vs_1dpa	DEG
foxp1b	9.57577e-77	-0.342942	0.061	0.163	2.33457e-72	Intermediate_Epithelial_0dpa_vs_1dpa	DEG
RPS17	1.44228e-76	0.369415	0.868	0.852	3.51627e-72	Intermediate_Epithelial_0dpa_vs_1dpa	DEG
myo1b	1.85846e-76	0.291179	0.15	0.061	4.53093e-72	Intermediate_Epithelial_0dpa_vs_1dpa	DEG
si:dkey-286j15.1	2.07135e-76	-0.343472	0.245	0.392	5.04996e-72	Intermediate_Epithelial_0dpa_vs_1dpa	DEG
gng12a	2.91627e-76	-0.300428	0.05	0.146	7.10986e-72	Intermediate_Epithelial_0dpa_vs_1dpa	DEG
bcl2l1	3.23441e-76	0.443258	0.25	0.139	7.88548e-72	Intermediate_Epithelial_0dpa_vs_1dpa	DEG
dusp22b	3.52451e-76	-0.332683	0.082	0.192	8.59275e-72	Intermediate_Epithelial_0dpa_vs_1dpa	DEG
fblim1	3.5634e-76	-0.274492	0.048	0.144	8.68758e-72	Intermediate_Epithelial_0dpa_vs_1dpa	DEG
anxa3a	3.80982e-76	0.392875	0.267	0.149	9.28833e-72	Intermediate_Epithelial_0dpa_vs_1dpa	DEG
slka	5.23773e-76	-0.336032	0.241	0.39	1.27696e-71	Intermediate_Epithelial_0dpa_vs_1dpa	DEG
zbtb20	5.72478e-76	0.518335	0.551	0.446	1.3957e-71	Intermediate_Epithelial_0dpa_vs_1dpa	DEG
mpc1	6.70576e-76	-0.323889	0.101	0.217	1.63486e-71	Intermediate_Epithelial_0dpa_vs_1dpa	DEG
c1s	9.00403e-76	-0.282659	0.039	0.13	2.19518e-71	Intermediate_Epithelial_0dpa_vs_1dpa	DEG
ankha	1.17612e-75	-0.328198	0.052	0.149	2.86737e-71	Intermediate_Epithelial_0dpa_vs_1dpa	DEG
BX640522.1	1.19337e-75	0.336685	0.161	0.07	2.90944e-71	Intermediate_Epithelial_0dpa_vs_1dpa	DEG
cd44a	1.21951e-75	-0.299746	0.88	0.938	2.97316e-71	Intermediate_Epithelial_0dpa_vs_1dpa	DEG
prmt1	1.29271e-75	0.424976	0.301	0.181	3.15162e-71	Intermediate_Epithelial_0dpa_vs_1dpa	DEG
mthfd1l	1.38771e-75	0.562549	0.492	0.396	3.38323e-71	Intermediate_Epithelial_0dpa_vs_1dpa	DEG
COX5B.1	1.40292e-75	-0.390645	0.358	0.501	3.42032e-71	Intermediate_Epithelial_0dpa_vs_1dpa	DEG
mical3a.1	1.46451e-75	-0.311016	0.14	0.27	3.57046e-71	Intermediate_Epithelial_0dpa_vs_1dpa	DEG
ttll4	1.4991e-75	0.342008	0.167	0.074	3.65482e-71	Intermediate_Epithelial_0dpa_vs_1dpa	DEG
ap1ar	1.50488e-75	-0.331289	0.12	0.24	3.6689e-71	Intermediate_Epithelial_0dpa_vs_1dpa	DEG
histh1l	1.5896e-75	-0.384244	0.101	0.215	3.87545e-71	Intermediate_Epithelial_0dpa_vs_1dpa	DEG
s100u	2.60498e-75	-0.38622	0.241	0.379	6.35094e-71	Intermediate_Epithelial_0dpa_vs_1dpa	DEG
ulk2	2.7985e-75	-0.29699	0.062	0.164	6.82275e-71	Intermediate_Epithelial_0dpa_vs_1dpa	DEG
sub1a	2.81098e-75	-0.322741	0.076	0.182	6.85316e-71	Intermediate_Epithelial_0dpa_vs_1dpa	DEG
cobll1b	2.85389e-75	0.570409	0.606	0.53	6.95778e-71	Intermediate_Epithelial_0dpa_vs_1dpa	DEG
src	3.08306e-75	-0.321098	0.309	0.461	7.51649e-71	Intermediate_Epithelial_0dpa_vs_1dpa	DEG
eif3ha	3.16262e-75	0.440683	0.367	0.246	7.71048e-71	Intermediate_Epithelial_0dpa_vs_1dpa	DEG
tdrkh	4.7866e-75	-0.280391	0.053	0.151	1.16697e-70	Intermediate_Epithelial_0dpa_vs_1dpa	DEG
im:7142702	5.24433e-75	-0.466962	0.213	0.345	1.27857e-70	Intermediate_Epithelial_0dpa_vs_1dpa	DEG
crip1	5.30038e-75	0.634412	0.387	0.265	1.29223e-70	Intermediate_Epithelial_0dpa_vs_1dpa	DEG
si:dkey-85k7.7	5.30907e-75	-0.440425	0.067	0.169	1.29435e-70	Intermediate_Epithelial_0dpa_vs_1dpa	DEG
si:ch211-196c10.15	5.61081e-75	0.282514	0.145	0.059	1.36792e-70	Intermediate_Epithelial_0dpa_vs_1dpa	DEG
pld1b	7.52787e-75	0.360988	0.194	0.092	1.83529e-70	Intermediate_Epithelial_0dpa_vs_1dpa	DEG
h3f3b.1.1	8.04375e-75	-0.367117	0.353	0.501	1.96107e-70	Intermediate_Epithelial_0dpa_vs_1dpa	DEG
glrx3	9.53512e-75	-0.292025	0.059	0.159	2.32466e-70	Intermediate_Epithelial_0dpa_vs_1dpa	DEG
bhlha9	1.02956e-74	0.492225	0.152	0.065	2.51006e-70	Intermediate_Epithelial_0dpa_vs_1dpa	DEG
lman1	1.11831e-74	-0.273138	0.047	0.14	2.72645e-70	Intermediate_Epithelial_0dpa_vs_1dpa	DEG
ccl27a	1.17519e-74	-0.299939	0.691	0.825	2.86512e-70	Intermediate_Epithelial_0dpa_vs_1dpa	DEG
kdm6bb	1.36998e-74	-0.259115	0.04	0.131	3.34002e-70	Intermediate_Epithelial_0dpa_vs_1dpa	DEG
myl12.1	1.55134e-74	-0.324506	0.543	0.692	3.78218e-70	Intermediate_Epithelial_0dpa_vs_1dpa	DEG
ap2s1	2.6414e-74	-0.319174	0.126	0.248	6.43974e-70	Intermediate_Epithelial_0dpa_vs_1dpa	DEG
spns1	3.6864e-74	-0.329654	0.115	0.233	8.98745e-70	Intermediate_Epithelial_0dpa_vs_1dpa	DEG
ern1	4.4701e-74	0.434645	0.347	0.224	1.08981e-69	Intermediate_Epithelial_0dpa_vs_1dpa	DEG
ipo7	4.80848e-74	0.448692	0.501	0.389	1.17231e-69	Intermediate_Epithelial_0dpa_vs_1dpa	DEG
tfap2c	5.21908e-74	0.543047	0.734	0.694	1.27241e-69	Intermediate_Epithelial_0dpa_vs_1dpa	DEG
bcl10	5.56278e-74	0.389791	0.247	0.136	1.35621e-69	Intermediate_Epithelial_0dpa_vs_1dpa	DEG
ndufb6	5.86027e-74	-0.268528	0.039	0.128	1.42873e-69	Intermediate_Epithelial_0dpa_vs_1dpa	DEG
ftr82	9.12839e-74	0.453516	0.306	0.188	2.2255e-69	Intermediate_Epithelial_0dpa_vs_1dpa	DEG
hsd11b1la	1.63279e-73	-0.340544	0.133	0.253	3.98075e-69	Intermediate_Epithelial_0dpa_vs_1dpa	DEG
chmp4c	2.10726e-73	0.404684	0.245	0.136	5.13751e-69	Intermediate_Epithelial_0dpa_vs_1dpa	DEG
ergic3	2.29768e-73	-0.310305	0.115	0.233	5.60175e-69	Intermediate_Epithelial_0dpa_vs_1dpa	DEG
myo9aa	2.58063e-73	-0.355046	0.199	0.334	6.29157e-69	Intermediate_Epithelial_0dpa_vs_1dpa	DEG
igsf11	2.71375e-73	-0.342333	0.093	0.204	6.61612e-69	Intermediate_Epithelial_0dpa_vs_1dpa	DEG
skia	2.81555e-73	-0.366293	0.41	0.558	6.8643e-69	Intermediate_Epithelial_0dpa_vs_1dpa	DEG
rhocb	3.49237e-73	-0.332089	0.161	0.29	8.5144e-69	Intermediate_Epithelial_0dpa_vs_1dpa	DEG
acsl4a	3.98166e-73	0.499572	0.435	0.319	9.7073e-69	Intermediate_Epithelial_0dpa_vs_1dpa	DEG
rarab	4.20951e-73	0.360279	0.15	0.063	1.02628e-68	Intermediate_Epithelial_0dpa_vs_1dpa	DEG
plpp1a	4.26311e-73	0.580815	0.444	0.334	1.03935e-68	Intermediate_Epithelial_0dpa_vs_1dpa	DEG
itchb	4.52261e-73	0.419598	0.404	0.281	1.10261e-68	Intermediate_Epithelial_0dpa_vs_1dpa	DEG
si:dkeyp-69e1.8	4.54908e-73	-0.3307	0.114	0.23	1.10907e-68	Intermediate_Epithelial_0dpa_vs_1dpa	DEG
prdx1	4.80046e-73	0.321329	0.122	0.044	1.17035e-68	Intermediate_Epithelial_0dpa_vs_1dpa	DEG
homeza	5.79209e-73	-0.292367	0.057	0.154	1.41211e-68	Intermediate_Epithelial_0dpa_vs_1dpa	DEG
pdia7	5.82596e-73	-0.251058	0.037	0.125	1.42037e-68	Intermediate_Epithelial_0dpa_vs_1dpa	DEG
dvl3b	1.00727e-72	0.251203	0.119	0.042	2.45573e-68	Intermediate_Epithelial_0dpa_vs_1dpa	DEG
plbd1	1.0628e-72	-0.266307	0.052	0.147	2.59111e-68	Intermediate_Epithelial_0dpa_vs_1dpa	DEG
ugcg	1.4595e-72	0.587099	0.747	0.735	3.55826e-68	Intermediate_Epithelial_0dpa_vs_1dpa	DEG
gnb1b	1.57326e-72	-0.347359	0.378	0.523	3.8356e-68	Intermediate_Epithelial_0dpa_vs_1dpa	DEG
ppardb	1.92814e-72	-0.313433	0.13	0.252	4.70081e-68	Intermediate_Epithelial_0dpa_vs_1dpa	DEG
cnpy1	2.0391e-72	-0.338468	0.218	0.354	4.97133e-68	Intermediate_Epithelial_0dpa_vs_1dpa	DEG
aldh9a1a.1	2.43865e-72	0.258837	0.114	0.04	5.94543e-68	Intermediate_Epithelial_0dpa_vs_1dpa	DEG
ctsa	3.18767e-72	-0.35365	0.153	0.276	7.77153e-68	Intermediate_Epithelial_0dpa_vs_1dpa	DEG
CTBP1	3.56464e-72	-0.388151	0.218	0.351	8.6906e-68	Intermediate_Epithelial_0dpa_vs_1dpa	DEG
ube2v1	4.08424e-72	-0.289946	0.074	0.177	9.95738e-68	Intermediate_Epithelial_0dpa_vs_1dpa	DEG
lmbr1l	4.16573e-72	0.34361	0.2	0.1	1.0156e-67	Intermediate_Epithelial_0dpa_vs_1dpa	DEG
npm1a	4.58778e-72	0.451411	0.273	0.162	1.1185e-67	Intermediate_Epithelial_0dpa_vs_1dpa	DEG
cers5	5.01373e-72	0.466113	0.333	0.216	1.22235e-67	Intermediate_Epithelial_0dpa_vs_1dpa	DEG
csrp1a	5.09973e-72	-0.337324	0.139	0.26	1.24331e-67	Intermediate_Epithelial_0dpa_vs_1dpa	DEG
ndrg2	6.01138e-72	0.490411	0.403	0.286	1.46558e-67	Intermediate_Epithelial_0dpa_vs_1dpa	DEG
rsl1d1	7.53271e-72	0.293481	0.156	0.067	1.83647e-67	Intermediate_Epithelial_0dpa_vs_1dpa	DEG
si:ch211-117l17.6	1.09132e-71	0.42167	0.164	0.073	2.66063e-67	Intermediate_Epithelial_0dpa_vs_1dpa	DEG
sumo3a	1.11937e-71	-0.258019	0.051	0.145	2.72903e-67	Intermediate_Epithelial_0dpa_vs_1dpa	DEG
si:dkey-16j16.4	1.48525e-71	-0.333387	0.197	0.333	3.62105e-67	Intermediate_Epithelial_0dpa_vs_1dpa	DEG
sardh	1.56721e-71	-0.350098	0.081	0.185	3.82086e-67	Intermediate_Epithelial_0dpa_vs_1dpa	DEG
ilrun	1.8004e-71	-0.290131	0.063	0.161	4.38937e-67	Intermediate_Epithelial_0dpa_vs_1dpa	DEG
dpm2	2.00072e-71	-0.309624	0.093	0.202	4.87775e-67	Intermediate_Epithelial_0dpa_vs_1dpa	DEG
ndufb5	2.15499e-71	-0.283953	0.044	0.134	5.25386e-67	Intermediate_Epithelial_0dpa_vs_1dpa	DEG
gnaia	2.88726e-71	-0.337716	0.246	0.385	7.03913e-67	Intermediate_Epithelial_0dpa_vs_1dpa	DEG
serbp1a	3.09794e-71	0.373763	0.776	0.751	7.55277e-67	Intermediate_Epithelial_0dpa_vs_1dpa	DEG
sulf2b	3.12003e-71	-0.394601	0.322	0.459	7.60663e-67	Intermediate_Epithelial_0dpa_vs_1dpa	DEG
znf654	3.27356e-71	-0.296659	0.059	0.155	7.98093e-67	Intermediate_Epithelial_0dpa_vs_1dpa	DEG
mia2	4.10579e-71	0.342209	0.221	0.115	1.00099e-66	Intermediate_Epithelial_0dpa_vs_1dpa	DEG
chd4a	4.1434e-71	-0.353637	0.209	0.34	1.01016e-66	Intermediate_Epithelial_0dpa_vs_1dpa	DEG
dph1	4.38743e-71	0.329554	0.148	0.062	1.06966e-66	Intermediate_Epithelial_0dpa_vs_1dpa	DEG
lmbrd2a	4.67075e-71	0.371852	0.252	0.141	1.13873e-66	Intermediate_Epithelial_0dpa_vs_1dpa	DEG
hectd1	4.73354e-71	-0.334116	0.435	0.579	1.15404e-66	Intermediate_Epithelial_0dpa_vs_1dpa	DEG
CU984600.1	5.52477e-71	-0.34599	0.321	0.465	1.34694e-66	Intermediate_Epithelial_0dpa_vs_1dpa	DEG
emc10	6.05656e-71	-0.293074	0.069	0.169	1.47659e-66	Intermediate_Epithelial_0dpa_vs_1dpa	DEG
rpn2	6.84919e-71	-0.307822	0.136	0.257	1.66983e-66	Intermediate_Epithelial_0dpa_vs_1dpa	DEG
dagla	8.13295e-71	0.340003	0.142	0.058	1.98281e-66	Intermediate_Epithelial_0dpa_vs_1dpa	DEG
gsk3ab	8.65003e-71	-0.31889	0.137	0.258	2.10888e-66	Intermediate_Epithelial_0dpa_vs_1dpa	DEG
selenow1	9.93294e-71	0.422289	0.733	0.679	2.42165e-66	Intermediate_Epithelial_0dpa_vs_1dpa	DEG
ciarta	1.0023e-70	-0.310928	0.138	0.26	2.4436e-66	Intermediate_Epithelial_0dpa_vs_1dpa	DEG
ifih1	1.27579e-70	-0.320766	0.08	0.183	3.11036e-66	Intermediate_Epithelial_0dpa_vs_1dpa	DEG
col1a1b	1.59423e-70	-0.442546	0.07	0.169	3.88673e-66	Intermediate_Epithelial_0dpa_vs_1dpa	DEG
si:ch211-233a24.2	1.63048e-70	0.428611	0.519	0.415	3.97512e-66	Intermediate_Epithelial_0dpa_vs_1dpa	DEG
satb1b	1.86916e-70	-0.284516	0.062	0.159	4.55702e-66	Intermediate_Epithelial_0dpa_vs_1dpa	DEG
ly75	2.11308e-70	-0.39754	0.262	0.397	5.1517e-66	Intermediate_Epithelial_0dpa_vs_1dpa	DEG
si:ch211-260e23.9	2.20689e-70	-0.254077	0.027	0.106	5.3804e-66	Intermediate_Epithelial_0dpa_vs_1dpa	DEG
ranbp9	2.36231e-70	-0.321148	0.175	0.303	5.75932e-66	Intermediate_Epithelial_0dpa_vs_1dpa	DEG
klf2a	2.43518e-70	-0.290486	0.191	0.329	5.93698e-66	Intermediate_Epithelial_0dpa_vs_1dpa	DEG
vdrb	2.9673e-70	0.458747	0.246	0.138	7.23427e-66	Intermediate_Epithelial_0dpa_vs_1dpa	DEG
ndufb2	3.0705e-70	-0.325352	0.101	0.211	7.48588e-66	Intermediate_Epithelial_0dpa_vs_1dpa	DEG
si:ch211-281g13.4	3.44721e-70	-0.259583	0.031	0.112	8.40429e-66	Intermediate_Epithelial_0dpa_vs_1dpa	DEG
pcyt2	4.23445e-70	0.411123	0.312	0.195	1.03236e-65	Intermediate_Epithelial_0dpa_vs_1dpa	DEG
cth	4.73484e-70	-0.261571	0.171	0.307	1.15436e-65	Intermediate_Epithelial_0dpa_vs_1dpa	DEG
abca1b	6.40344e-70	-0.335467	0.184	0.314	1.56116e-65	Intermediate_Epithelial_0dpa_vs_1dpa	DEG
slain2	8.62314e-70	0.326022	0.196	0.098	2.10232e-65	Intermediate_Epithelial_0dpa_vs_1dpa	DEG
uacab	1.13032e-69	-0.319001	0.496	0.643	2.75572e-65	Intermediate_Epithelial_0dpa_vs_1dpa	DEG
ccdc47	1.18487e-69	-0.336475	0.145	0.264	2.88871e-65	Intermediate_Epithelial_0dpa_vs_1dpa	DEG
rab5if	1.33663e-69	-0.290535	0.097	0.207	3.2587e-65	Intermediate_Epithelial_0dpa_vs_1dpa	DEG
psmd11b	2.07281e-69	-0.277725	0.051	0.142	5.05352e-65	Intermediate_Epithelial_0dpa_vs_1dpa	DEG
tbxas1	4.10852e-69	0.352013	0.171	0.079	1.00166e-64	Intermediate_Epithelial_0dpa_vs_1dpa	DEG
tmco1	5.49053e-69	-0.277484	0.074	0.175	1.33859e-64	Intermediate_Epithelial_0dpa_vs_1dpa	DEG
pag1	8.67e-69	0.419202	0.2	0.103	2.11375e-64	Intermediate_Epithelial_0dpa_vs_1dpa	DEG
strbp	9.90105e-69	0.454699	0.514	0.403	2.41388e-64	Intermediate_Epithelial_0dpa_vs_1dpa	DEG
gng5	1.2917e-68	-0.338	0.19	0.318	3.14916e-64	Intermediate_Epithelial_0dpa_vs_1dpa	DEG
anxa1d	1.61406e-68	-0.32749	0.094	0.201	3.93507e-64	Intermediate_Epithelial_0dpa_vs_1dpa	DEG
hmgb2a	1.66465e-68	-0.352108	0.359	0.5	4.05841e-64	Intermediate_Epithelial_0dpa_vs_1dpa	DEG
wsb2	1.97018e-68	0.328513	0.182	0.088	4.80329e-64	Intermediate_Epithelial_0dpa_vs_1dpa	DEG
si:dkey-182g1.2	1.98182e-68	-0.381475	0.369	0.506	4.83168e-64	Intermediate_Epithelial_0dpa_vs_1dpa	DEG
mcts1	2.51111e-68	-0.291512	0.059	0.153	6.1221e-64	Intermediate_Epithelial_0dpa_vs_1dpa	DEG
si:ch73-376l24.2	2.93023e-68	-0.295941	0.06	0.154	7.14391e-64	Intermediate_Epithelial_0dpa_vs_1dpa	DEG
ppp3r1a	3.19108e-68	-0.285101	0.07	0.168	7.77986e-64	Intermediate_Epithelial_0dpa_vs_1dpa	DEG
adgrg1	3.61982e-68	-0.336845	0.08	0.182	8.82513e-64	Intermediate_Epithelial_0dpa_vs_1dpa	DEG
thrb	4.46014e-68	0.466585	0.315	0.201	1.08738e-63	Intermediate_Epithelial_0dpa_vs_1dpa	DEG
atp13a3	4.58689e-68	0.442023	0.6	0.514	1.11828e-63	Intermediate_Epithelial_0dpa_vs_1dpa	DEG
mapkapk2a	4.95287e-68	0.411984	0.729	0.694	1.20751e-63	Intermediate_Epithelial_0dpa_vs_1dpa	DEG
ntn4	6.92592e-68	0.308954	0.14	0.059	1.68854e-63	Intermediate_Epithelial_0dpa_vs_1dpa	DEG
usp22	9.31194e-68	-0.289036	0.072	0.169	2.27025e-63	Intermediate_Epithelial_0dpa_vs_1dpa	DEG
tuba8l2	1.0768e-67	-0.3504	0.432	0.575	2.62524e-63	Intermediate_Epithelial_0dpa_vs_1dpa	DEG
nrg2a	1.67695e-67	0.425316	0.219	0.117	4.08841e-63	Intermediate_Epithelial_0dpa_vs_1dpa	DEG
usp12b	1.72535e-67	-0.291707	0.088	0.191	4.2064e-63	Intermediate_Epithelial_0dpa_vs_1dpa	DEG
ripor1	1.92906e-67	-0.498906	0.069	0.163	4.70304e-63	Intermediate_Epithelial_0dpa_vs_1dpa	DEG
phc2a	2.132e-67	-0.307866	0.076	0.176	5.19782e-63	Intermediate_Epithelial_0dpa_vs_1dpa	DEG
sel1l	2.85231e-67	-0.270958	0.08	0.181	6.95394e-63	Intermediate_Epithelial_0dpa_vs_1dpa	DEG
sat1a.2	3.24014e-67	0.588925	0.472	0.377	7.89945e-63	Intermediate_Epithelial_0dpa_vs_1dpa	DEG
dusp2	4.70534e-67	-0.385905	0.089	0.19	1.14716e-62	Intermediate_Epithelial_0dpa_vs_1dpa	DEG
smarce1	5.34267e-67	-0.278575	0.1	0.207	1.30254e-62	Intermediate_Epithelial_0dpa_vs_1dpa	DEG
tmbim1a	5.69837e-67	0.434395	0.403	0.287	1.38926e-62	Intermediate_Epithelial_0dpa_vs_1dpa	DEG
kras	7.18534e-67	0.439587	0.329	0.214	1.75179e-62	Intermediate_Epithelial_0dpa_vs_1dpa	DEG
ncalda	1.09812e-66	-0.347558	0.142	0.26	2.67723e-62	Intermediate_Epithelial_0dpa_vs_1dpa	DEG
clec16a	1.17529e-66	-0.345319	0.166	0.287	2.86536e-62	Intermediate_Epithelial_0dpa_vs_1dpa	DEG
eif1	1.50536e-66	0.385025	0.687	0.629	3.67007e-62	Intermediate_Epithelial_0dpa_vs_1dpa	DEG
txlna	1.62834e-66	-0.302381	0.094	0.199	3.96989e-62	Intermediate_Epithelial_0dpa_vs_1dpa	DEG
rmdn1	1.91907e-66	0.304874	0.209	0.11	4.67869e-62	Intermediate_Epithelial_0dpa_vs_1dpa	DEG
lsm5	2.02911e-66	-0.266743	0.043	0.127	4.94698e-62	Intermediate_Epithelial_0dpa_vs_1dpa	DEG
cycsb	2.10315e-66	-0.343404	0.46	0.599	5.12748e-62	Intermediate_Epithelial_0dpa_vs_1dpa	DEG
si:ch1073-440b2.1	2.12329e-66	0.459574	0.652	0.578	5.17659e-62	Intermediate_Epithelial_0dpa_vs_1dpa	DEG
edem1	2.25594e-66	-0.323427	0.297	0.436	5.49999e-62	Intermediate_Epithelial_0dpa_vs_1dpa	DEG
tgm5l	2.27587e-66	0.425689	0.663	0.578	5.54857e-62	Intermediate_Epithelial_0dpa_vs_1dpa	DEG
tmed7	2.29381e-66	-0.336604	0.185	0.307	5.5923e-62	Intermediate_Epithelial_0dpa_vs_1dpa	DEG
cldn23a	2.30523e-66	0.289068	0.135	0.055	5.62014e-62	Intermediate_Epithelial_0dpa_vs_1dpa	DEG
senp2	2.76752e-66	0.379795	0.346	0.23	6.74721e-62	Intermediate_Epithelial_0dpa_vs_1dpa	DEG
vwa5a	2.87839e-66	0.358038	0.327	0.21	7.01751e-62	Intermediate_Epithelial_0dpa_vs_1dpa	DEG
casp6b.1	2.93308e-66	-0.334463	0.216	0.346	7.15085e-62	Intermediate_Epithelial_0dpa_vs_1dpa	DEG
psmb5	4.23882e-66	-0.290371	0.107	0.216	1.03342e-61	Intermediate_Epithelial_0dpa_vs_1dpa	DEG
ppp1r10	4.7374e-66	0.461522	0.464	0.354	1.15498e-61	Intermediate_Epithelial_0dpa_vs_1dpa	DEG
elovl1a	6.2162e-66	0.53084	0.641	0.582	1.51551e-61	Intermediate_Epithelial_0dpa_vs_1dpa	DEG
trip12	6.88869e-66	-0.315873	0.26	0.394	1.67946e-61	Intermediate_Epithelial_0dpa_vs_1dpa	DEG
ptges3b	7.26886e-66	-0.347092	0.215	0.341	1.77215e-61	Intermediate_Epithelial_0dpa_vs_1dpa	DEG
kazna	8.12077e-66	0.397786	0.197	0.101	1.97984e-61	Intermediate_Epithelial_0dpa_vs_1dpa	DEG
LO016987.2	8.45606e-66	-0.261528	0.046	0.132	2.06159e-61	Intermediate_Epithelial_0dpa_vs_1dpa	DEG
mindy3	9.68541e-66	0.356063	0.155	0.07	2.3613e-61	Intermediate_Epithelial_0dpa_vs_1dpa	DEG
tefa	9.8101e-66	-0.343385	0.256	0.389	2.3917e-61	Intermediate_Epithelial_0dpa_vs_1dpa	DEG
ecpas	1.29637e-65	-0.304447	0.121	0.232	3.16056e-61	Intermediate_Epithelial_0dpa_vs_1dpa	DEG
tom1l2	1.41389e-65	-0.260013	0.051	0.139	3.44705e-61	Intermediate_Epithelial_0dpa_vs_1dpa	DEG
foxo3b	1.76444e-65	0.494248	0.48	0.37	4.30172e-61	Intermediate_Epithelial_0dpa_vs_1dpa	DEG
hnrnpub	1.83655e-65	-0.321526	0.367	0.508	4.47751e-61	Intermediate_Epithelial_0dpa_vs_1dpa	DEG
blmh	1.87897e-65	-0.32165	0.17	0.292	4.58093e-61	Intermediate_Epithelial_0dpa_vs_1dpa	DEG
ywhae2	1.89275e-65	-0.326623	0.243	0.373	4.61453e-61	Intermediate_Epithelial_0dpa_vs_1dpa	DEG
papss2b	1.92376e-65	0.373412	0.278	0.167	4.69012e-61	Intermediate_Epithelial_0dpa_vs_1dpa	DEG
si:rp71-1g18.13	1.94533e-65	0.391932	0.284	0.174	4.74272e-61	Intermediate_Epithelial_0dpa_vs_1dpa	DEG
itm2bb	2.56364e-65	-0.272877	0.72	0.824	6.25015e-61	Intermediate_Epithelial_0dpa_vs_1dpa	DEG
dab2ipa	2.7589e-65	0.345369	0.157	0.072	6.72621e-61	Intermediate_Epithelial_0dpa_vs_1dpa	DEG
ubap2a	3.36404e-65	-0.290785	0.192	0.319	8.20153e-61	Intermediate_Epithelial_0dpa_vs_1dpa	DEG
tor1	3.46468e-65	-0.274901	0.072	0.168	8.44689e-61	Intermediate_Epithelial_0dpa_vs_1dpa	DEG
si:ch211-202f3.3	4.71974e-65	0.327082	0.176	0.085	1.15067e-60	Intermediate_Epithelial_0dpa_vs_1dpa	DEG
gnl3	5.88936e-65	0.30749	0.18	0.089	1.43583e-60	Intermediate_Epithelial_0dpa_vs_1dpa	DEG
nectin1b	9.09062e-65	-0.295129	0.838	0.913	2.21629e-60	Intermediate_Epithelial_0dpa_vs_1dpa	DEG
cbsb	9.11161e-65	-0.290381	0.471	0.612	2.22141e-60	Intermediate_Epithelial_0dpa_vs_1dpa	DEG
cd9a	9.82705e-65	-0.295656	0.094	0.198	2.39583e-60	Intermediate_Epithelial_0dpa_vs_1dpa	DEG
midn	9.85922e-65	0.483219	0.843	0.832	2.40368e-60	Intermediate_Epithelial_0dpa_vs_1dpa	DEG
atp6v0b	1.05539e-64	-0.328852	0.169	0.289	2.57305e-60	Intermediate_Epithelial_0dpa_vs_1dpa	DEG
slc20a2	1.06735e-64	-0.318265	0.585	0.708	2.60221e-60	Intermediate_Epithelial_0dpa_vs_1dpa	DEG
tmem176l.3b	1.2259e-64	-0.332862	0.297	0.435	2.98874e-60	Intermediate_Epithelial_0dpa_vs_1dpa	DEG
ralbp1	1.96076e-64	-0.267326	0.066	0.16	4.78034e-60	Intermediate_Epithelial_0dpa_vs_1dpa	DEG
nop56	1.97035e-64	0.427713	0.387	0.273	4.80372e-60	Intermediate_Epithelial_0dpa_vs_1dpa	DEG
rpl10a	1.98207e-64	0.319409	0.864	0.855	4.83229e-60	Intermediate_Epithelial_0dpa_vs_1dpa	DEG
si:ch211-160o17.4	2.33086e-64	-0.318	0.231	0.359	5.68263e-60	Intermediate_Epithelial_0dpa_vs_1dpa	DEG
vaspb	2.48716e-64	-0.317409	0.282	0.419	6.0637e-60	Intermediate_Epithelial_0dpa_vs_1dpa	DEG
saa	2.52622e-64	-0.719536	0.142	0.256	6.15893e-60	Intermediate_Epithelial_0dpa_vs_1dpa	DEG
zgc:162698	3.5841e-64	-0.312593	0.267	0.4	8.73803e-60	Intermediate_Epithelial_0dpa_vs_1dpa	DEG
prkacbb	3.60931e-64	-0.299933	0.134	0.247	8.79951e-60	Intermediate_Epithelial_0dpa_vs_1dpa	DEG
rbm39b	3.7402e-64	-0.295904	0.084	0.183	9.11862e-60	Intermediate_Epithelial_0dpa_vs_1dpa	DEG
ndufa11	4.80599e-64	-0.272613	0.068	0.162	1.1717e-59	Intermediate_Epithelial_0dpa_vs_1dpa	DEG
ascc3	5.30511e-64	0.397871	0.313	0.204	1.29338e-59	Intermediate_Epithelial_0dpa_vs_1dpa	DEG
npl	5.42607e-64	0.332576	0.177	0.088	1.32288e-59	Intermediate_Epithelial_0dpa_vs_1dpa	DEG
sppl3	5.64172e-64	-0.264572	0.079	0.176	1.37545e-59	Intermediate_Epithelial_0dpa_vs_1dpa	DEG
card11	5.7219e-64	-0.330368	0.141	0.255	1.395e-59	Intermediate_Epithelial_0dpa_vs_1dpa	DEG
tmem263	5.92568e-64	-0.26952	0.079	0.177	1.44468e-59	Intermediate_Epithelial_0dpa_vs_1dpa	DEG
si:dkey-40c23.2	6.01602e-64	-0.298685	0.073	0.167	1.46671e-59	Intermediate_Epithelial_0dpa_vs_1dpa	DEG
mpped2a	6.21275e-64	0.374196	0.187	0.096	1.51467e-59	Intermediate_Epithelial_0dpa_vs_1dpa	DEG
zgc:173737	7.01103e-64	-0.320662	0.164	0.283	1.70929e-59	Intermediate_Epithelial_0dpa_vs_1dpa	DEG
gse1	7.70814e-64	0.395985	0.341	0.228	1.87925e-59	Intermediate_Epithelial_0dpa_vs_1dpa	DEG
clcn3	7.94063e-64	0.413724	0.508	0.408	1.93593e-59	Intermediate_Epithelial_0dpa_vs_1dpa	DEG
tex264a	9.93983e-64	0.471025	0.515	0.413	2.42333e-59	Intermediate_Epithelial_0dpa_vs_1dpa	DEG
supt6h	1.01868e-63	-0.328323	0.184	0.305	2.48355e-59	Intermediate_Epithelial_0dpa_vs_1dpa	DEG
nfkbie	1.09512e-63	-0.295755	0.141	0.257	2.66991e-59	Intermediate_Epithelial_0dpa_vs_1dpa	DEG
eif4ebp3l	1.098e-63	0.271789	0.108	0.04	2.67693e-59	Intermediate_Epithelial_0dpa_vs_1dpa	DEG
kcnk1a	1.17988e-63	0.325586	0.193	0.1	2.87655e-59	Intermediate_Epithelial_0dpa_vs_1dpa	DEG
si:dkeyp-27c8.2	1.25249e-63	-0.355056	0.217	0.341	3.05357e-59	Intermediate_Epithelial_0dpa_vs_1dpa	DEG
sgms2b	1.34178e-63	0.348448	0.212	0.115	3.27125e-59	Intermediate_Epithelial_0dpa_vs_1dpa	DEG
apoeb	1.60065e-63	0.54284	0.573	0.482	3.90238e-59	Intermediate_Epithelial_0dpa_vs_1dpa	DEG
c2cd2l	1.62565e-63	0.310752	0.111	0.042	3.96333e-59	Intermediate_Epithelial_0dpa_vs_1dpa	DEG
si:ch211-140m22.7	1.87103e-63	0.262834	0.136	0.058	4.56158e-59	Intermediate_Epithelial_0dpa_vs_1dpa	DEG
tegt	2.00954e-63	-0.297476	0.161	0.281	4.89926e-59	Intermediate_Epithelial_0dpa_vs_1dpa	DEG
aars2	2.62753e-63	-0.299209	0.092	0.193	6.40593e-59	Intermediate_Epithelial_0dpa_vs_1dpa	DEG
mt-nd5	2.7134e-63	-0.28934	0.666	0.785	6.61526e-59	Intermediate_Epithelial_0dpa_vs_1dpa	DEG
atxn2l	2.7193e-63	-0.335066	0.222	0.349	6.62964e-59	Intermediate_Epithelial_0dpa_vs_1dpa	DEG
ctdp1	2.9419e-63	0.433032	0.257	0.153	7.17236e-59	Intermediate_Epithelial_0dpa_vs_1dpa	DEG
lxn	3.53267e-63	0.32535	0.202	0.107	8.61265e-59	Intermediate_Epithelial_0dpa_vs_1dpa	DEG
arhgap21a	4.68678e-63	0.357235	0.147	0.067	1.14264e-58	Intermediate_Epithelial_0dpa_vs_1dpa	DEG
nufip2	5.38958e-63	-0.301645	0.123	0.231	1.31398e-58	Intermediate_Epithelial_0dpa_vs_1dpa	DEG
stx12	5.6673e-63	-0.295945	0.131	0.243	1.38169e-58	Intermediate_Epithelial_0dpa_vs_1dpa	DEG
cog2	5.72398e-63	-0.288496	0.077	0.172	1.39551e-58	Intermediate_Epithelial_0dpa_vs_1dpa	DEG
rtn4a	6.03667e-63	-0.322929	0.292	0.424	1.47174e-58	Intermediate_Epithelial_0dpa_vs_1dpa	DEG
CR848749.1	9.33005e-63	0.439955	0.632	0.54	2.27467e-58	Intermediate_Epithelial_0dpa_vs_1dpa	DEG
spint2	1.03479e-62	0.318284	0.808	0.771	2.52283e-58	Intermediate_Epithelial_0dpa_vs_1dpa	DEG
prickle3	1.41381e-62	-0.338816	0.219	0.344	3.44686e-58	Intermediate_Epithelial_0dpa_vs_1dpa	DEG
tpm3	1.44227e-62	0.397309	0.764	0.748	3.51626e-58	Intermediate_Epithelial_0dpa_vs_1dpa	DEG
hadhb	1.44602e-62	-0.301003	0.104	0.207	3.5254e-58	Intermediate_Epithelial_0dpa_vs_1dpa	DEG
safb	1.71428e-62	-0.321147	0.192	0.313	4.17941e-58	Intermediate_Epithelial_0dpa_vs_1dpa	DEG
cdc42ep5	2.70154e-62	0.407138	0.37	0.258	6.58634e-58	Intermediate_Epithelial_0dpa_vs_1dpa	DEG
uckl1b	2.78428e-62	0.351426	0.236	0.134	6.78806e-58	Intermediate_Epithelial_0dpa_vs_1dpa	DEG
rcan1a	3.08236e-62	-0.350344	0.333	0.467	7.5148e-58	Intermediate_Epithelial_0dpa_vs_1dpa	DEG
arpc4l	3.36067e-62	-0.306362	0.124	0.232	8.19332e-58	Intermediate_Epithelial_0dpa_vs_1dpa	DEG
pard3ba	4.2401e-62	0.341793	0.219	0.121	1.03374e-57	Intermediate_Epithelial_0dpa_vs_1dpa	DEG
slc6a16b	4.34242e-62	0.354983	0.219	0.122	1.05868e-57	Intermediate_Epithelial_0dpa_vs_1dpa	DEG
paip2b	5.30774e-62	-0.290077	0.106	0.21	1.29403e-57	Intermediate_Epithelial_0dpa_vs_1dpa	DEG
lmnb2	5.42646e-62	-0.311642	0.165	0.281	1.32297e-57	Intermediate_Epithelial_0dpa_vs_1dpa	DEG
grb10a	5.46645e-62	-0.433949	0.107	0.21	1.33272e-57	Intermediate_Epithelial_0dpa_vs_1dpa	DEG
cdc42bpb	6.00501e-62	0.53417	0.654	0.613	1.46402e-57	Intermediate_Epithelial_0dpa_vs_1dpa	DEG
FQ377660.1	6.63528e-62	-0.359675	0.284	0.411	1.61768e-57	Intermediate_Epithelial_0dpa_vs_1dpa	DEG
wasf2	7.1309e-62	-0.308236	0.183	0.303	1.73851e-57	Intermediate_Epithelial_0dpa_vs_1dpa	DEG
NAV1	7.2477e-62	-0.309554	0.1	0.204	1.76699e-57	Intermediate_Epithelial_0dpa_vs_1dpa	DEG
selenow2b	7.37185e-62	0.383725	0.432	0.315	1.79726e-57	Intermediate_Epithelial_0dpa_vs_1dpa	DEG
ubc	9.35622e-62	-0.295348	0.727	0.828	2.28105e-57	Intermediate_Epithelial_0dpa_vs_1dpa	DEG
emx3	1.01507e-61	-0.291765	0.115	0.222	2.47473e-57	Intermediate_Epithelial_0dpa_vs_1dpa	DEG
copb2	1.12827e-61	-0.313197	0.251	0.379	2.75072e-57	Intermediate_Epithelial_0dpa_vs_1dpa	DEG
keap1a	1.15524e-61	-0.265505	0.324	0.467	2.81647e-57	Intermediate_Epithelial_0dpa_vs_1dpa	DEG
ndufs4	1.95345e-61	-0.281321	0.053	0.137	4.7625e-57	Intermediate_Epithelial_0dpa_vs_1dpa	DEG
foxo4	2.03906e-61	0.400299	0.348	0.237	4.97123e-57	Intermediate_Epithelial_0dpa_vs_1dpa	DEG
tesca	2.12801e-61	0.335195	0.172	0.085	5.18809e-57	Intermediate_Epithelial_0dpa_vs_1dpa	DEG
atp2a2b	2.30353e-61	0.398951	0.719	0.686	5.61602e-57	Intermediate_Epithelial_0dpa_vs_1dpa	DEG
rca2.1	2.304e-61	0.375785	0.662	0.603	5.61716e-57	Intermediate_Epithelial_0dpa_vs_1dpa	DEG
nudc	2.55921e-61	-0.267077	0.072	0.165	6.23936e-57	Intermediate_Epithelial_0dpa_vs_1dpa	DEG
snx17	2.8835e-61	-0.294352	0.173	0.292	7.02997e-57	Intermediate_Epithelial_0dpa_vs_1dpa	DEG
ndufa12	3.22456e-61	-0.2825	0.074	0.166	7.86148e-57	Intermediate_Epithelial_0dpa_vs_1dpa	DEG
snrpf	3.25732e-61	-0.283056	0.075	0.167	7.94135e-57	Intermediate_Epithelial_0dpa_vs_1dpa	DEG
net1	3.60968e-61	0.346432	0.274	0.166	8.8004e-57	Intermediate_Epithelial_0dpa_vs_1dpa	DEG
baiap2l1b	4.10409e-61	0.424467	0.323	0.213	1.00058e-56	Intermediate_Epithelial_0dpa_vs_1dpa	DEG
vps29	4.3448e-61	-0.251111	0.057	0.143	1.05926e-56	Intermediate_Epithelial_0dpa_vs_1dpa	DEG
pdha1a	4.8314e-61	-0.281288	0.079	0.172	1.1779e-56	Intermediate_Epithelial_0dpa_vs_1dpa	DEG
srp54	6.07397e-61	-0.305853	0.128	0.236	1.48083e-56	Intermediate_Epithelial_0dpa_vs_1dpa	DEG
uba7	6.08615e-61	-0.290588	0.084	0.181	1.4838e-56	Intermediate_Epithelial_0dpa_vs_1dpa	DEG
cct5	7.85808e-61	-0.322925	0.227	0.35	1.9158e-56	Intermediate_Epithelial_0dpa_vs_1dpa	DEG
cacna1ia	9.92475e-61	-0.524298	0.129	0.234	2.41965e-56	Intermediate_Epithelial_0dpa_vs_1dpa	DEG
tmtc3	1.13367e-60	-0.279072	0.098	0.197	2.76389e-56	Intermediate_Epithelial_0dpa_vs_1dpa	DEG
tmem50a	1.53228e-60	-0.308583	0.234	0.357	3.73569e-56	Intermediate_Epithelial_0dpa_vs_1dpa	DEG
cdc34a	2.13323e-60	0.48509	0.582	0.511	5.20081e-56	Intermediate_Epithelial_0dpa_vs_1dpa	DEG
ier5l	2.37142e-60	-0.266085	0.084	0.181	5.78152e-56	Intermediate_Epithelial_0dpa_vs_1dpa	DEG
ube2al	3.19751e-60	0.367381	0.367	0.257	7.79553e-56	Intermediate_Epithelial_0dpa_vs_1dpa	DEG
cflara	3.37981e-60	0.390769	0.35	0.239	8.23997e-56	Intermediate_Epithelial_0dpa_vs_1dpa	DEG
SLC5A10	3.67625e-60	0.398679	0.343	0.232	8.96269e-56	Intermediate_Epithelial_0dpa_vs_1dpa	DEG
ddr2l	3.94307e-60	-0.280809	0.09	0.187	9.61321e-56	Intermediate_Epithelial_0dpa_vs_1dpa	DEG
cse1l	3.98968e-60	-0.288814	0.094	0.191	9.72683e-56	Intermediate_Epithelial_0dpa_vs_1dpa	DEG
plekhg4	4.92818e-60	-0.282301	0.461	0.6	1.20149e-55	Intermediate_Epithelial_0dpa_vs_1dpa	DEG
bmpr2b	6.8979e-60	0.461508	0.578	0.5	1.68171e-55	Intermediate_Epithelial_0dpa_vs_1dpa	DEG
csnk2a1	8.55448e-60	-0.272169	0.124	0.23	2.08558e-55	Intermediate_Epithelial_0dpa_vs_1dpa	DEG
arl4d	8.58844e-60	0.271462	0.195	0.103	2.09386e-55	Intermediate_Epithelial_0dpa_vs_1dpa	DEG
rps26	9.01215e-60	0.385632	0.7	0.647	2.19716e-55	Intermediate_Epithelial_0dpa_vs_1dpa	DEG
supt3h	9.85932e-60	0.412053	0.292	0.187	2.4037e-55	Intermediate_Epithelial_0dpa_vs_1dpa	DEG
SAMD9	1.01193e-59	-0.285513	0.091	0.188	2.46709e-55	Intermediate_Epithelial_0dpa_vs_1dpa	DEG
si:ch211-214b16.4	1.02811e-59	-0.327913	0.08	0.173	2.50652e-55	Intermediate_Epithelial_0dpa_vs_1dpa	DEG
rasgef1ba	1.06907e-59	0.565436	0.398	0.297	2.60639e-55	Intermediate_Epithelial_0dpa_vs_1dpa	DEG
nfe2l3	1.11011e-59	-0.291106	0.175	0.291	2.70644e-55	Intermediate_Epithelial_0dpa_vs_1dpa	DEG
chchd6a	1.12673e-59	0.289505	0.144	0.065	2.74698e-55	Intermediate_Epithelial_0dpa_vs_1dpa	DEG
zcchc7	1.16381e-59	0.371494	0.207	0.114	2.83736e-55	Intermediate_Epithelial_0dpa_vs_1dpa	DEG
lrba	1.31072e-59	0.339109	0.808	0.792	3.19553e-55	Intermediate_Epithelial_0dpa_vs_1dpa	DEG
daxx	1.47811e-59	-0.315032	0.181	0.297	3.60363e-55	Intermediate_Epithelial_0dpa_vs_1dpa	DEG
tp53	1.86802e-59	-0.318131	0.23	0.352	4.55422e-55	Intermediate_Epithelial_0dpa_vs_1dpa	DEG
rasa4	2.08461e-59	-0.330385	0.073	0.163	5.08228e-55	Intermediate_Epithelial_0dpa_vs_1dpa	DEG
jmjd1cb	2.13697e-59	-0.254117	0.79	0.885	5.20992e-55	Intermediate_Epithelial_0dpa_vs_1dpa	DEG
h2ax1	2.1794e-59	-0.2942	0.222	0.346	5.31337e-55	Intermediate_Epithelial_0dpa_vs_1dpa	DEG
mbnl1	2.18139e-59	0.424967	0.418	0.311	5.31823e-55	Intermediate_Epithelial_0dpa_vs_1dpa	DEG
tjp1a	2.40492e-59	0.535517	0.334	0.225	5.8632e-55	Intermediate_Epithelial_0dpa_vs_1dpa	DEG
nabp1a	2.645e-59	0.344826	0.208	0.116	6.44851e-55	Intermediate_Epithelial_0dpa_vs_1dpa	DEG
CU462878.2	3.19848e-59	-0.268691	0.09	0.186	7.7979e-55	Intermediate_Epithelial_0dpa_vs_1dpa	DEG
dnajc3b	3.33068e-59	-0.310106	0.111	0.212	8.1202e-55	Intermediate_Epithelial_0dpa_vs_1dpa	DEG
mmd	3.6432e-59	0.363794	0.274	0.168	8.88213e-55	Intermediate_Epithelial_0dpa_vs_1dpa	DEG
acp6	3.84734e-59	-0.269253	0.081	0.174	9.37981e-55	Intermediate_Epithelial_0dpa_vs_1dpa	DEG
atp5md	3.89055e-59	-0.299823	0.113	0.215	9.48515e-55	Intermediate_Epithelial_0dpa_vs_1dpa	DEG
cyb5b	4.05628e-59	0.318433	0.199	0.108	9.88921e-55	Intermediate_Epithelial_0dpa_vs_1dpa	DEG
fam107b	4.14618e-59	0.650831	0.313	0.213	1.01084e-54	Intermediate_Epithelial_0dpa_vs_1dpa	DEG
yars1	4.40783e-59	-0.289532	0.097	0.194	1.07463e-54	Intermediate_Epithelial_0dpa_vs_1dpa	DEG
med12	6.56501e-59	-0.310313	0.142	0.249	1.60055e-54	Intermediate_Epithelial_0dpa_vs_1dpa	DEG
sdhc	1.01362e-58	-0.287825	0.104	0.203	2.4712e-54	Intermediate_Epithelial_0dpa_vs_1dpa	DEG
si:dkey-242g16.2	1.03955e-58	0.402729	0.234	0.138	2.53442e-54	Intermediate_Epithelial_0dpa_vs_1dpa	DEG
lmna	1.13751e-58	0.379221	0.845	0.843	2.77325e-54	Intermediate_Epithelial_0dpa_vs_1dpa	DEG
fam83hb	1.3881e-58	-0.283073	0.427	0.561	3.3842e-54	Intermediate_Epithelial_0dpa_vs_1dpa	DEG
gsto2	1.48112e-58	-0.256626	0.067	0.155	3.61097e-54	Intermediate_Epithelial_0dpa_vs_1dpa	DEG
ciartb	1.89322e-58	0.320795	0.187	0.098	4.61566e-54	Intermediate_Epithelial_0dpa_vs_1dpa	DEG
slc25a36b	2.1386e-58	-0.289717	0.149	0.26	5.2139e-54	Intermediate_Epithelial_0dpa_vs_1dpa	DEG
lsm7	3.28165e-58	-0.258095	0.064	0.149	8.00067e-54	Intermediate_Epithelial_0dpa_vs_1dpa	DEG
atp6v0ca	3.86249e-58	-0.31008	0.613	0.733	9.41676e-54	Intermediate_Epithelial_0dpa_vs_1dpa	DEG
stk38a	4.40763e-58	-0.263132	0.091	0.187	1.07458e-53	Intermediate_Epithelial_0dpa_vs_1dpa	DEG
mtmr12	4.69197e-58	-0.286971	0.086	0.179	1.1439e-53	Intermediate_Epithelial_0dpa_vs_1dpa	DEG
mef2aa	4.77125e-58	0.395129	0.786	0.759	1.16323e-53	Intermediate_Epithelial_0dpa_vs_1dpa	DEG
mbnl2	4.87304e-58	0.417181	0.602	0.528	1.18805e-53	Intermediate_Epithelial_0dpa_vs_1dpa	DEG
fam160a1a	6.45982e-58	-0.291916	0.38	0.518	1.5749e-53	Intermediate_Epithelial_0dpa_vs_1dpa	DEG
rer1	7.03211e-58	-0.288042	0.333	0.467	1.71443e-53	Intermediate_Epithelial_0dpa_vs_1dpa	DEG
adck1	7.58097e-58	0.42106	0.335	0.229	1.84824e-53	Intermediate_Epithelial_0dpa_vs_1dpa	DEG
pwp2h	7.67296e-58	0.31139	0.15	0.071	1.87067e-53	Intermediate_Epithelial_0dpa_vs_1dpa	DEG
robo2.1	7.98963e-58	0.445315	0.303	0.201	1.94787e-53	Intermediate_Epithelial_0dpa_vs_1dpa	DEG
tcf12	8.95798e-58	0.303464	0.132	0.059	2.18396e-53	Intermediate_Epithelial_0dpa_vs_1dpa	DEG
actr2b	9.88025e-58	-0.288242	0.174	0.288	2.4088e-53	Intermediate_Epithelial_0dpa_vs_1dpa	DEG
si:dkey-40c11.2	1.00748e-57	-0.285649	0.046	0.124	2.45624e-53	Intermediate_Epithelial_0dpa_vs_1dpa	DEG
plekhg6	1.04577e-57	0.591146	0.522	0.459	2.54958e-53	Intermediate_Epithelial_0dpa_vs_1dpa	DEG
cd82a	1.121e-57	0.268919	0.135	0.06	2.733e-53	Intermediate_Epithelial_0dpa_vs_1dpa	DEG
epha2b	1.14184e-57	0.464752	0.402	0.295	2.78381e-53	Intermediate_Epithelial_0dpa_vs_1dpa	DEG
rhoac	1.24604e-57	-0.284256	0.102	0.2	3.03785e-53	Intermediate_Epithelial_0dpa_vs_1dpa	DEG
pak6b	1.34006e-57	-0.281645	0.095	0.191	3.26706e-53	Intermediate_Epithelial_0dpa_vs_1dpa	DEG
atp5meb	1.66868e-57	-0.305092	0.149	0.256	4.06824e-53	Intermediate_Epithelial_0dpa_vs_1dpa	DEG
abca3b	2.11442e-57	-0.265032	0.169	0.282	5.15495e-53	Intermediate_Epithelial_0dpa_vs_1dpa	DEG
eef1b2	2.4432e-57	0.362025	0.707	0.656	5.95652e-53	Intermediate_Epithelial_0dpa_vs_1dpa	DEG
atp7a	2.5339e-57	-0.300369	0.12	0.222	6.17765e-53	Intermediate_Epithelial_0dpa_vs_1dpa	DEG
CR394535.1	2.93369e-57	0.327349	0.187	0.099	7.15234e-53	Intermediate_Epithelial_0dpa_vs_1dpa	DEG
tma7	3.62143e-57	-0.288414	0.117	0.217	8.82906e-53	Intermediate_Epithelial_0dpa_vs_1dpa	DEG
lpp	4.00427e-57	0.401551	0.601	0.523	9.76242e-53	Intermediate_Epithelial_0dpa_vs_1dpa	DEG
gpsm2	4.8329e-57	-0.279435	0.335	0.474	1.17826e-52	Intermediate_Epithelial_0dpa_vs_1dpa	DEG
oafa	4.84959e-57	-0.335522	0.182	0.296	1.18233e-52	Intermediate_Epithelial_0dpa_vs_1dpa	DEG
ppargc1b	4.94787e-57	0.396311	0.309	0.202	1.20629e-52	Intermediate_Epithelial_0dpa_vs_1dpa	DEG
rab11fip4b	5.0689e-57	0.363363	0.29	0.186	1.2358e-52	Intermediate_Epithelial_0dpa_vs_1dpa	DEG
gnb1a	6.27268e-57	-0.271211	0.422	0.564	1.52928e-52	Intermediate_Epithelial_0dpa_vs_1dpa	DEG
cmtr1	6.41426e-57	-0.277919	0.071	0.158	1.5638e-52	Intermediate_Epithelial_0dpa_vs_1dpa	DEG
si:dkey-33i11.9	6.47322e-57	0.344564	0.263	0.157	1.57817e-52	Intermediate_Epithelial_0dpa_vs_1dpa	DEG
zbtb8os	7.44209e-57	-0.27989	0.098	0.193	1.81438e-52	Intermediate_Epithelial_0dpa_vs_1dpa	DEG
ebna1bp2	1.1096e-56	0.285889	0.142	0.066	2.7052e-52	Intermediate_Epithelial_0dpa_vs_1dpa	DEG
atp6v1aa	1.28053e-56	-0.262394	0.065	0.15	3.12194e-52	Intermediate_Epithelial_0dpa_vs_1dpa	DEG
slc35d2	1.31772e-56	0.333123	0.218	0.125	3.21259e-52	Intermediate_Epithelial_0dpa_vs_1dpa	DEG
gtpbp1	1.39824e-56	-0.254117	0.122	0.225	3.40891e-52	Intermediate_Epithelial_0dpa_vs_1dpa	DEG
TRAPPC9	1.53103e-56	0.280098	0.151	0.073	3.73265e-52	Intermediate_Epithelial_0dpa_vs_1dpa	DEG
elocb	2.21452e-56	-0.292783	0.13	0.233	5.39901e-52	Intermediate_Epithelial_0dpa_vs_1dpa	DEG
ddx39aa	2.30036e-56	-0.319783	0.182	0.293	5.60827e-52	Intermediate_Epithelial_0dpa_vs_1dpa	DEG
nuak1b	2.51694e-56	0.306388	0.158	0.078	6.13629e-52	Intermediate_Epithelial_0dpa_vs_1dpa	DEG
cx35.4	2.53567e-56	-0.304806	0.412	0.54	6.18196e-52	Intermediate_Epithelial_0dpa_vs_1dpa	DEG
tmem45b	2.84663e-56	0.310663	0.235	0.136	6.94009e-52	Intermediate_Epithelial_0dpa_vs_1dpa	DEG
CU856423.1	3.40015e-56	-0.258703	0.074	0.162	8.28956e-52	Intermediate_Epithelial_0dpa_vs_1dpa	DEG
ptpn23b	4.2978e-56	0.324586	0.233	0.137	1.0478e-51	Intermediate_Epithelial_0dpa_vs_1dpa	DEG
rpl27	4.9001e-56	0.311193	0.865	0.856	1.19464e-51	Intermediate_Epithelial_0dpa_vs_1dpa	DEG
tnika	6.20145e-56	0.383251	0.86	0.839	1.51191e-51	Intermediate_Epithelial_0dpa_vs_1dpa	DEG
htatip2	7.06428e-56	-0.273378	0.095	0.19	1.72227e-51	Intermediate_Epithelial_0dpa_vs_1dpa	DEG
vps4b	7.47587e-56	0.317677	0.679	0.621	1.82262e-51	Intermediate_Epithelial_0dpa_vs_1dpa	DEG
ehd1b	8.09577e-56	-0.339668	0.167	0.275	1.97375e-51	Intermediate_Epithelial_0dpa_vs_1dpa	DEG
KLHL29	9.08131e-56	0.395265	0.256	0.159	2.21402e-51	Intermediate_Epithelial_0dpa_vs_1dpa	DEG
rad21a	9.21817e-56	-0.266329	0.132	0.235	2.24739e-51	Intermediate_Epithelial_0dpa_vs_1dpa	DEG
lrrc17	1.04543e-55	-0.411977	0.394	0.514	2.54876e-51	Intermediate_Epithelial_0dpa_vs_1dpa	DEG
pno1	1.11585e-55	0.2573	0.159	0.079	2.72044e-51	Intermediate_Epithelial_0dpa_vs_1dpa	DEG
dlat	1.14632e-55	-0.258102	0.071	0.156	2.79473e-51	Intermediate_Epithelial_0dpa_vs_1dpa	DEG
cxcl18a.1	1.14971e-55	-0.37606	0.255	0.376	2.803e-51	Intermediate_Epithelial_0dpa_vs_1dpa	DEG
rabgap1	1.1723e-55	0.375874	0.22	0.128	2.85808e-51	Intermediate_Epithelial_0dpa_vs_1dpa	DEG
crfb4	1.21914e-55	0.444502	0.603	0.525	2.97226e-51	Intermediate_Epithelial_0dpa_vs_1dpa	DEG
phtf1	1.23946e-55	0.295815	0.189	0.102	3.0218e-51	Intermediate_Epithelial_0dpa_vs_1dpa	DEG
si:ch211-200p22.4	1.81898e-55	0.424416	0.465	0.368	4.43467e-51	Intermediate_Epithelial_0dpa_vs_1dpa	DEG
elk1	2.20717e-55	0.288914	0.188	0.101	5.38109e-51	Intermediate_Epithelial_0dpa_vs_1dpa	DEG
efna1a	2.26477e-55	0.355396	0.259	0.161	5.52152e-51	Intermediate_Epithelial_0dpa_vs_1dpa	DEG
ccnt2a	2.30131e-55	0.332596	0.3	0.196	5.6106e-51	Intermediate_Epithelial_0dpa_vs_1dpa	DEG
rps13	2.43012e-55	0.29186	0.901	0.903	5.92464e-51	Intermediate_Epithelial_0dpa_vs_1dpa	DEG
bcl11ba	3.59747e-55	0.264615	0.112	0.046	8.77062e-51	Intermediate_Epithelial_0dpa_vs_1dpa	DEG
b4galt1	3.7303e-55	0.374089	0.309	0.204	9.09447e-51	Intermediate_Epithelial_0dpa_vs_1dpa	DEG
thrab	3.76371e-55	0.419087	0.258	0.161	9.17593e-51	Intermediate_Epithelial_0dpa_vs_1dpa	DEG
vamp3	4.14998e-55	-0.277324	0.107	0.203	1.01176e-50	Intermediate_Epithelial_0dpa_vs_1dpa	DEG
dennd6aa	4.38646e-55	-0.261435	0.091	0.182	1.06942e-50	Intermediate_Epithelial_0dpa_vs_1dpa	DEG
prkcda	4.711e-55	-0.263849	0.106	0.204	1.14854e-50	Intermediate_Epithelial_0dpa_vs_1dpa	DEG
ube2l3b	4.76012e-55	-0.302309	0.29	0.412	1.16052e-50	Intermediate_Epithelial_0dpa_vs_1dpa	DEG
acap3b	5.00248e-55	0.364318	0.237	0.142	1.2196e-50	Intermediate_Epithelial_0dpa_vs_1dpa	DEG
chmp6b	5.21867e-55	-0.282849	0.22	0.34	1.27231e-50	Intermediate_Epithelial_0dpa_vs_1dpa	DEG
znf185	5.56691e-55	0.504816	0.788	0.782	1.35721e-50	Intermediate_Epithelial_0dpa_vs_1dpa	DEG
zgc:172139	5.65639e-55	0.355762	0.317	0.213	1.37903e-50	Intermediate_Epithelial_0dpa_vs_1dpa	DEG
slmapa	6.56385e-55	0.388246	0.531	0.442	1.60027e-50	Intermediate_Epithelial_0dpa_vs_1dpa	DEG
ide	6.66965e-55	-0.29351	0.194	0.308	1.62606e-50	Intermediate_Epithelial_0dpa_vs_1dpa	DEG
gbp	9.88562e-55	-0.265059	0.098	0.192	2.41011e-50	Intermediate_Epithelial_0dpa_vs_1dpa	DEG
ppl	1.14969e-54	0.581751	0.832	0.851	2.80294e-50	Intermediate_Epithelial_0dpa_vs_1dpa	DEG
hacd2	1.47664e-54	-0.29141	0.111	0.206	3.60006e-50	Intermediate_Epithelial_0dpa_vs_1dpa	DEG
pld2	1.9781e-54	0.40022	0.251	0.155	4.82261e-50	Intermediate_Epithelial_0dpa_vs_1dpa	DEG
lrch4	1.99917e-54	-0.313901	0.196	0.308	4.87398e-50	Intermediate_Epithelial_0dpa_vs_1dpa	DEG
uqcrq	2.88021e-54	-0.298256	0.159	0.266	7.02196e-50	Intermediate_Epithelial_0dpa_vs_1dpa	DEG
h3f3c	3.60391e-54	-0.282452	0.202	0.317	8.78634e-50	Intermediate_Epithelial_0dpa_vs_1dpa	DEG
ndufa1	3.63015e-54	-0.289059	0.177	0.288	8.85031e-50	Intermediate_Epithelial_0dpa_vs_1dpa	DEG
tspan17	5.49947e-54	0.369828	0.222	0.132	1.34077e-49	Intermediate_Epithelial_0dpa_vs_1dpa	DEG
[truncated: 13,635 more rows]

## Sheet: Table S2C
Supplementary Table S2 Stage DEGs identified in each cell type and GO term enrichement results of shared/dynamic modules
C. Stage DEGs in BE
gene	p_val	avg_log2FC	pct.1	pct.2	p_val_adj	comparison	category
calua	0	-1.49406	0.067	0.623	0	Basal_Epithelial_0dpa_vs_1dpa	DEG
cd9b	0	-1.38634	0.668	0.963	0	Basal_Epithelial_0dpa_vs_1dpa	DEG
hsp90b1	0	-2.21283	0.363	0.923	0	Basal_Epithelial_0dpa_vs_1dpa	DEG
prickle1b	0	-2.35304	0.018	0.721	0	Basal_Epithelial_0dpa_vs_1dpa	DEG
etnk1	0	2.23509	0.798	0.331	0	Basal_Epithelial_0dpa_vs_1dpa	DEG
lsp1b	0	-1.97116	0.365	0.922	0	Basal_Epithelial_0dpa_vs_1dpa	DEG
pnp5a	0	2.96997	0.985	0.638	0	Basal_Epithelial_0dpa_vs_1dpa	DEG
sb:cb1058	0	-2.5938	0.092	0.864	0	Basal_Epithelial_0dpa_vs_1dpa	DEG
mmp14a	0	-1.8455	0.167	0.814	0	Basal_Epithelial_0dpa_vs_1dpa	DEG
tnnt3b	0	-1.68228	0.104	0.661	0	Basal_Epithelial_0dpa_vs_1dpa	DEG
tln2a	0	-1.42923	0.002	0.522	0	Basal_Epithelial_0dpa_vs_1dpa	DEG
txn	0	-1.88125	0.264	0.911	0	Basal_Epithelial_0dpa_vs_1dpa	DEG
cd81a	0	-2.44541	0.234	0.962	0	Basal_Epithelial_0dpa_vs_1dpa	DEG
ostc	0	-1.38823	0.159	0.701	0	Basal_Epithelial_0dpa_vs_1dpa	DEG
mdka	0	-2.4526	0.433	0.967	0	Basal_Epithelial_0dpa_vs_1dpa	DEG
tmem132e	0	-1.46618	0.152	0.707	0	Basal_Epithelial_0dpa_vs_1dpa	DEG
vcana	0	-4.19734	0.001	0.862	0	Basal_Epithelial_0dpa_vs_1dpa	DEG
mamdc2a	0	-2.32122	0.003	0.717	0	Basal_Epithelial_0dpa_vs_1dpa	DEG
ctsla	0	-1.78878	0.437	0.935	0	Basal_Epithelial_0dpa_vs_1dpa	DEG
zfand5a	0	1.99048	0.866	0.5	0	Basal_Epithelial_0dpa_vs_1dpa	DEG
fras1	0	-2.5128	0.145	0.849	0	Basal_Epithelial_0dpa_vs_1dpa	DEG
angptl2a	0	-1.39636	0.018	0.504	0	Basal_Epithelial_0dpa_vs_1dpa	DEG
hk2	0	1.90216	0.937	0.686	0	Basal_Epithelial_0dpa_vs_1dpa	DEG
ndufa4l	0	-1.32944	0.604	0.935	0	Basal_Epithelial_0dpa_vs_1dpa	DEG
nfixb	0	1.94644	0.633	0.156	0	Basal_Epithelial_0dpa_vs_1dpa	DEG
atp5mc1	0	-1.33382	0.105	0.628	0	Basal_Epithelial_0dpa_vs_1dpa	DEG
si:ch211-76l23.4	0	5.26329	0.867	0.049	0	Basal_Epithelial_0dpa_vs_1dpa	DEG
rcn3	0	-2.29711	0.029	0.681	0	Basal_Epithelial_0dpa_vs_1dpa	DEG
col1a1a	0	-2.55148	0.676	0.959	0	Basal_Epithelial_0dpa_vs_1dpa	DEG
kdelr2a	0	-1.43015	0.287	0.783	0	Basal_Epithelial_0dpa_vs_1dpa	DEG
prkcsh	0	-1.43768	0.131	0.684	0	Basal_Epithelial_0dpa_vs_1dpa	DEG
BX284638.2	0	-1.43437	0.012	0.508	0	Basal_Epithelial_0dpa_vs_1dpa	DEG
BX908797.1	0	1.67379	0.686	0.249	0	Basal_Epithelial_0dpa_vs_1dpa	DEG
krt4	0	-4.23378	0.512	0.999	0	Basal_Epithelial_0dpa_vs_1dpa	DEG
p4hb	0	-1.57942	0.345	0.861	0	Basal_Epithelial_0dpa_vs_1dpa	DEG
tuba8l4	0	-1.18019	0.82	0.979	0	Basal_Epithelial_0dpa_vs_1dpa	DEG
col7a1	0	-3.25128	0.328	0.977	0	Basal_Epithelial_0dpa_vs_1dpa	DEG
prelid3b	0	1.68821	0.843	0.453	0	Basal_Epithelial_0dpa_vs_1dpa	DEG
ca16b	0	-2.12052	0.007	0.571	0	Basal_Epithelial_0dpa_vs_1dpa	DEG
ptgis	0	2.19306	0.697	0.273	0	Basal_Epithelial_0dpa_vs_1dpa	DEG
zgc:136930	0	3.27428	0.746	0.001	0	Basal_Epithelial_0dpa_vs_1dpa	DEG
epha4a	0	-1.48994	0.084	0.635	0	Basal_Epithelial_0dpa_vs_1dpa	DEG
lamc1	0	-1.55888	0.146	0.71	0	Basal_Epithelial_0dpa_vs_1dpa	DEG
arhgef4	0	1.81495	0.925	0.599	0	Basal_Epithelial_0dpa_vs_1dpa	DEG
mmp14b	0	-1.86529	0.076	0.676	0	Basal_Epithelial_0dpa_vs_1dpa	DEG
dad1	0	-1.99905	0.224	0.866	0	Basal_Epithelial_0dpa_vs_1dpa	DEG
tgm1l1	0	2.12573	0.893	0.529	0	Basal_Epithelial_0dpa_vs_1dpa	DEG
asph	0	-1.58713	0.267	0.77	0	Basal_Epithelial_0dpa_vs_1dpa	DEG
per2	0	1.32389	0.903	0.717	0	Basal_Epithelial_0dpa_vs_1dpa	DEG
eif5a2	0	-1.56088	0.244	0.804	0	Basal_Epithelial_0dpa_vs_1dpa	DEG
calr3b	0	-2.12265	0.187	0.84	0	Basal_Epithelial_0dpa_vs_1dpa	DEG
selenof	0	-1.48182	0.244	0.799	0	Basal_Epithelial_0dpa_vs_1dpa	DEG
plpp2a	0	1.88678	0.713	0.295	0	Basal_Epithelial_0dpa_vs_1dpa	DEG
col17a1a	0	2.38471	0.595	0.034	0	Basal_Epithelial_0dpa_vs_1dpa	DEG
anxa5b	0	-1.31861	0.273	0.785	0	Basal_Epithelial_0dpa_vs_1dpa	DEG
fn1b	0	-1.59719	0.816	0.999	0	Basal_Epithelial_0dpa_vs_1dpa	DEG
dachc	0	-1.59629	0.013	0.557	0	Basal_Epithelial_0dpa_vs_1dpa	DEG
stox2a	0	-1.48975	0.038	0.548	0	Basal_Epithelial_0dpa_vs_1dpa	DEG
kcnq5b	0	2.66928	0.713	0.043	0	Basal_Epithelial_0dpa_vs_1dpa	DEG
jag1a	0	-1.9888	0.104	0.754	0	Basal_Epithelial_0dpa_vs_1dpa	DEG
fn1a	0	-5.59446	0.179	0.992	0	Basal_Epithelial_0dpa_vs_1dpa	DEG
col18a1a	0	-1.57448	0.382	0.884	0	Basal_Epithelial_0dpa_vs_1dpa	DEG
adarb1b	0	1.85454	0.912	0.613	0	Basal_Epithelial_0dpa_vs_1dpa	DEG
ccdc80	0	-1.46981	0.006	0.505	0	Basal_Epithelial_0dpa_vs_1dpa	DEG
hdac4	0	1.3035	0.935	0.815	0	Basal_Epithelial_0dpa_vs_1dpa	DEG
igsf3	0	-2.63994	0.007	0.731	0	Basal_Epithelial_0dpa_vs_1dpa	DEG
tfpia	0	-1.35764	0.683	0.978	0	Basal_Epithelial_0dpa_vs_1dpa	DEG
col5a2a	0	-1.78919	0.41	0.863	0	Basal_Epithelial_0dpa_vs_1dpa	DEG
dnajb11	0	-1.40578	0.138	0.685	0	Basal_Epithelial_0dpa_vs_1dpa	DEG
fkbp7	0	-1.49252	0.103	0.623	0	Basal_Epithelial_0dpa_vs_1dpa	DEG
ednrbb	0	-2.89001	0.051	0.804	0	Basal_Epithelial_0dpa_vs_1dpa	DEG
plecb	0	0.966435	1	0.997	0	Basal_Epithelial_0dpa_vs_1dpa	DEG
pnrc2	0	1.64966	0.952	0.835	0	Basal_Epithelial_0dpa_vs_1dpa	DEG
krtcap2	0	-1.54221	0.091	0.668	0	Basal_Epithelial_0dpa_vs_1dpa	DEG
s100a10b	0	-1.40554	0.933	0.99	0	Basal_Epithelial_0dpa_vs_1dpa	DEG
icn2	0	1.36541	0.88	0.591	0	Basal_Epithelial_0dpa_vs_1dpa	DEG
tubb5	0	-2.71376	0.006	0.806	0	Basal_Epithelial_0dpa_vs_1dpa	DEG
si:ch211-198c19.3	0	2.63301	0.845	0.306	0	Basal_Epithelial_0dpa_vs_1dpa	DEG
bcam	0	-2.04569	0.413	0.932	0	Basal_Epithelial_0dpa_vs_1dpa	DEG
ctnnb1	0	-1.30351	0.402	0.878	0	Basal_Epithelial_0dpa_vs_1dpa	DEG
igfbp1a	0	-1.82982	0.292	0.872	0	Basal_Epithelial_0dpa_vs_1dpa	DEG
jag2b	0	2.34822	0.839	0.441	0	Basal_Epithelial_0dpa_vs_1dpa	DEG
daam1b	0	-2.03401	0.492	0.941	0	Basal_Epithelial_0dpa_vs_1dpa	DEG
pdia6	0	-1.72716	0.22	0.816	0	Basal_Epithelial_0dpa_vs_1dpa	DEG
ezrb	0	1.88456	0.908	0.746	0	Basal_Epithelial_0dpa_vs_1dpa	DEG
col12a1b	0	-3.02079	0.143	0.896	0	Basal_Epithelial_0dpa_vs_1dpa	DEG
itgb4	0	1.62674	0.999	0.993	0	Basal_Epithelial_0dpa_vs_1dpa	DEG
tp73	0	-1.54644	0.198	0.726	0	Basal_Epithelial_0dpa_vs_1dpa	DEG
cox6a1	0	-1.30238	0.367	0.831	0	Basal_Epithelial_0dpa_vs_1dpa	DEG
slc23a2	0	2.35615	0.664	0.202	0	Basal_Epithelial_0dpa_vs_1dpa	DEG
plch2a	0	-1.98099	0.62	0.972	0	Basal_Epithelial_0dpa_vs_1dpa	DEG
angptl2b	0	-2.11884	0.006	0.68	0	Basal_Epithelial_0dpa_vs_1dpa	DEG
psma3	0	-1.56704	0.121	0.727	0	Basal_Epithelial_0dpa_vs_1dpa	DEG
col12a1a	0	-4.27568	0.083	0.967	0	Basal_Epithelial_0dpa_vs_1dpa	DEG
cyp26c1	0	2.36005	0.578	0.064	0	Basal_Epithelial_0dpa_vs_1dpa	DEG
foxn3	0	1.95881	0.905	0.704	0	Basal_Epithelial_0dpa_vs_1dpa	DEG
tiam2a	0	-1.7479	0.195	0.736	0	Basal_Epithelial_0dpa_vs_1dpa	DEG
ywhaqb	0	-1.77144	0.759	0.986	0	Basal_Epithelial_0dpa_vs_1dpa	DEG
asap2a	0	-1.58166	0.045	0.55	0	Basal_Epithelial_0dpa_vs_1dpa	DEG
spint1a	0	1.22628	0.947	0.796	0	Basal_Epithelial_0dpa_vs_1dpa	DEG
ahnak	0	0.877627	1	0.998	0	Basal_Epithelial_0dpa_vs_1dpa	DEG
CR383676.2	0	1.4031	0.977	0.973	0	Basal_Epithelial_0dpa_vs_1dpa	DEG
cd74a	0	2.05681	0.807	0.373	0	Basal_Epithelial_0dpa_vs_1dpa	DEG
sparc	0	-2.07244	0.791	0.98	0	Basal_Epithelial_0dpa_vs_1dpa	DEG
fosl1a	0	2.33697	0.955	0.581	0	Basal_Epithelial_0dpa_vs_1dpa	DEG
LO018188.1	0	-1.88751	0.15	0.798	0	Basal_Epithelial_0dpa_vs_1dpa	DEG
cfd	0	3.32769	0.735	0	0	Basal_Epithelial_0dpa_vs_1dpa	DEG
zgc:153911	0	1.93208	0.939	0.686	0	Basal_Epithelial_0dpa_vs_1dpa	DEG
rsrp1	0	1.69843	0.91	0.606	0	Basal_Epithelial_0dpa_vs_1dpa	DEG
psmb1	0	-1.87106	0.152	0.822	0	Basal_Epithelial_0dpa_vs_1dpa	DEG
marcksl1a	0	-1.81344	0.056	0.662	0	Basal_Epithelial_0dpa_vs_1dpa	DEG
zgc:193505	0	1.85704	0.883	0.565	0	Basal_Epithelial_0dpa_vs_1dpa	DEG
adam8a	0	-4.95021	0.004	0.978	0	Basal_Epithelial_0dpa_vs_1dpa	DEG
sgpl1	0	-1.33039	0.076	0.59	0	Basal_Epithelial_0dpa_vs_1dpa	DEG
FRMD1	0	-1.67237	0.143	0.739	0	Basal_Epithelial_0dpa_vs_1dpa	DEG
zswim8	0	-1.62663	0.093	0.634	0	Basal_Epithelial_0dpa_vs_1dpa	DEG
myofl	0	-1.6756	0.284	0.838	0	Basal_Epithelial_0dpa_vs_1dpa	DEG
ggps1	0	1.7665	0.784	0.389	0	Basal_Epithelial_0dpa_vs_1dpa	DEG
nedd4a	0	1.97703	0.611	0.116	0	Basal_Epithelial_0dpa_vs_1dpa	DEG
ssr3	0	-1.8637	0.333	0.889	0	Basal_Epithelial_0dpa_vs_1dpa	DEG
ctsh	0	-2.22094	0.034	0.685	0	Basal_Epithelial_0dpa_vs_1dpa	DEG
cd82b	0	-1.38446	0.517	0.933	0	Basal_Epithelial_0dpa_vs_1dpa	DEG
rbp4	0	4.6033	0.933	0.046	0	Basal_Epithelial_0dpa_vs_1dpa	DEG
kdelr2b	0	-1.81268	0.128	0.741	0	Basal_Epithelial_0dpa_vs_1dpa	DEG
cxl34c	0	-4.04941	0.052	0.872	0	Basal_Epithelial_0dpa_vs_1dpa	DEG
ptp4a2b	0	2.09542	0.94	0.636	0	Basal_Epithelial_0dpa_vs_1dpa	DEG
fabp11a	0	-2.41689	0.001	0.558	0	Basal_Epithelial_0dpa_vs_1dpa	DEG
eppk1	0	-1.51174	0.863	0.992	0	Basal_Epithelial_0dpa_vs_1dpa	DEG
ssr2	0	-1.72414	0.264	0.814	0	Basal_Epithelial_0dpa_vs_1dpa	DEG
col1a2	0	-2.16257	0.751	0.96	0	Basal_Epithelial_0dpa_vs_1dpa	DEG
fkbp9	0	-2.18197	0.057	0.734	0	Basal_Epithelial_0dpa_vs_1dpa	DEG
krtt1c19e	0	2.37221	0.507	0.004	0	Basal_Epithelial_0dpa_vs_1dpa	DEG
krt91	0	1.13356	0.997	0.986	0	Basal_Epithelial_0dpa_vs_1dpa	DEG
slc39a7	0	-1.29975	0.048	0.543	0	Basal_Epithelial_0dpa_vs_1dpa	DEG
ctnnb2	0	-1.68647	0.285	0.872	0	Basal_Epithelial_0dpa_vs_1dpa	DEG
serpinh1b	0	-2.96094	0.016	0.679	0	Basal_Epithelial_0dpa_vs_1dpa	DEG
ptgir	0	-1.82183	0.075	0.659	0	Basal_Epithelial_0dpa_vs_1dpa	DEG
frem2b	0	-2.14069	0.252	0.825	0	Basal_Epithelial_0dpa_vs_1dpa	DEG
alcamb	0	-1.72998	0.056	0.61	0	Basal_Epithelial_0dpa_vs_1dpa	DEG
postnb	0	-2.35797	0.66	0.969	0	Basal_Epithelial_0dpa_vs_1dpa	DEG
vmp1	0	-3.25793	0.127	0.877	0	Basal_Epithelial_0dpa_vs_1dpa	DEG
tnfrsf19	0	-1.41663	0.072	0.582	0	Basal_Epithelial_0dpa_vs_1dpa	DEG
irs1	0	-1.57404	0.223	0.81	0	Basal_Epithelial_0dpa_vs_1dpa	DEG
zbtb16b	0	1.97868	0.557	0.031	0	Basal_Epithelial_0dpa_vs_1dpa	DEG
actn4	0	1.81924	0.952	0.83	0	Basal_Epithelial_0dpa_vs_1dpa	DEG
robo2.1	0	-1.66862	0.167	0.679	0	Basal_Epithelial_0dpa_vs_1dpa	DEG
vwa1	0	-2.08087	0.443	0.959	0	Basal_Epithelial_0dpa_vs_1dpa	DEG
ddost	0	-1.65802	0.136	0.76	0	Basal_Epithelial_0dpa_vs_1dpa	DEG
ssr4	0	-1.76268	0.206	0.806	0	Basal_Epithelial_0dpa_vs_1dpa	DEG
c1qtnf12	0	2.15646	0.522	0.016	0	Basal_Epithelial_0dpa_vs_1dpa	DEG
plxna2	0	-2.2508	0.097	0.81	0	Basal_Epithelial_0dpa_vs_1dpa	DEG
krt8	0	-2.69346	0.229	0.942	0	Basal_Epithelial_0dpa_vs_1dpa	DEG
hspg2	0	-2.20192	0.43	0.958	0	Basal_Epithelial_0dpa_vs_1dpa	DEG
krt18a.1	0	-5.64161	0.063	0.999	0	Basal_Epithelial_0dpa_vs_1dpa	DEG
itga5	0	-3.40986	0.094	0.977	0	Basal_Epithelial_0dpa_vs_1dpa	DEG
col5a1	0	-1.98565	0.748	0.987	0	Basal_Epithelial_0dpa_vs_1dpa	DEG
lifrb	0	-1.51071	0.432	0.889	0	Basal_Epithelial_0dpa_vs_1dpa	DEG
psmb7	0	-1.23812	0.021	0.516	0	Basal_Epithelial_0dpa_vs_1dpa	DEG
tnfrsfa	0	2.11308	0.95	0.673	0	Basal_Epithelial_0dpa_vs_1dpa	DEG
zbtb16a	0	2.90199	0.78	0.102	0	Basal_Epithelial_0dpa_vs_1dpa	DEG
cast	0	1.97443	0.989	0.868	0	Basal_Epithelial_0dpa_vs_1dpa	DEG
slco2b1	0	2.10215	0.701	0.107	0	Basal_Epithelial_0dpa_vs_1dpa	DEG
niban2a	0	1.61943	0.894	0.637	0	Basal_Epithelial_0dpa_vs_1dpa	DEG
si:dkey-183i3.5	0	3.6588	0.81	0.002	0	Basal_Epithelial_0dpa_vs_1dpa	DEG
TCF4	0	2.45724	0.865	0.351	0	Basal_Epithelial_0dpa_vs_1dpa	DEG
krt93	0	-2.79906	0.099	0.872	0	Basal_Epithelial_0dpa_vs_1dpa	DEG
krt94	0	-3.32962	0.336	0.986	0	Basal_Epithelial_0dpa_vs_1dpa	DEG
il17rc	0	1.67607	0.619	0.166	0	Basal_Epithelial_0dpa_vs_1dpa	DEG
krt15	0	1.73343	0.991	0.865	0	Basal_Epithelial_0dpa_vs_1dpa	DEG
jupa	0	1.47046	0.997	0.974	0	Basal_Epithelial_0dpa_vs_1dpa	DEG
atp5f1b	0	-1.40294	0.393	0.868	0	Basal_Epithelial_0dpa_vs_1dpa	DEG
mxra8a	0	-1.76498	0.018	0.527	0	Basal_Epithelial_0dpa_vs_1dpa	DEG
si:ch211-69b7.6	0	2.32257	0.722	0.295	0	Basal_Epithelial_0dpa_vs_1dpa	DEG
ccl25b	0	4.50819	0.868	0.047	0	Basal_Epithelial_0dpa_vs_1dpa	DEG
foxp4	0	-1.63318	0.484	0.903	0	Basal_Epithelial_0dpa_vs_1dpa	DEG
timp4.3	0	1.81312	0.496	0.028	0	Basal_Epithelial_0dpa_vs_1dpa	DEG
si:ch211-222l21.1	0	-1.5408	0.612	0.966	0	Basal_Epithelial_0dpa_vs_1dpa	DEG
serpinh1a	0	-1.75158	0.056	0.675	0	Basal_Epithelial_0dpa_vs_1dpa	DEG
cblb	0	-1.57597	0.196	0.726	0	Basal_Epithelial_0dpa_vs_1dpa	DEG
nrg1	0	2.65043	0.964	0.709	0	Basal_Epithelial_0dpa_vs_1dpa	DEG
hyou1	0	-1.52937	0.28	0.814	0	Basal_Epithelial_0dpa_vs_1dpa	DEG
slc20a1b	0	1.69091	0.844	0.551	0	Basal_Epithelial_0dpa_vs_1dpa	DEG
si:busm1-57f23.1	0	-2.25643	0.358	0.933	0	Basal_Epithelial_0dpa_vs_1dpa	DEG
ccl27b	0	1.7726	0.495	0.017	0	Basal_Epithelial_0dpa_vs_1dpa	DEG
mmp30	0	2.60176	0.694	0.124	0	Basal_Epithelial_0dpa_vs_1dpa	DEG
ptgdsb.1	0	5.51852	0.979	0.018	0	Basal_Epithelial_0dpa_vs_1dpa	DEG
txndc5	0	-1.56857	0.146	0.734	0	Basal_Epithelial_0dpa_vs_1dpa	DEG
pdia4	0	-1.41138	0.119	0.641	0	Basal_Epithelial_0dpa_vs_1dpa	DEG
snai2	0	-1.48311	0.103	0.648	0	Basal_Epithelial_0dpa_vs_1dpa	DEG
ptgdsb.2	0	2.06523	0.56	0.003	0	Basal_Epithelial_0dpa_vs_1dpa	DEG
inhbaa	0	-3.06174	0.089	0.813	0	Basal_Epithelial_0dpa_vs_1dpa	DEG
calr3a	0	-1.90227	0.252	0.856	0	Basal_Epithelial_0dpa_vs_1dpa	DEG
si:ch211-117l17.6	0	2.83858	0.789	0.176	0	Basal_Epithelial_0dpa_vs_1dpa	DEG
SBNO2	0	1.44059	0.89	0.707	0	Basal_Epithelial_0dpa_vs_1dpa	DEG
tpm4a	0	-2.2925	0.106	0.663	0	Basal_Epithelial_0dpa_vs_1dpa	DEG
krt97	0	-1.67672	0.626	0.964	0	Basal_Epithelial_0dpa_vs_1dpa	DEG
prickle1a	0	-2.05482	0.064	0.733	0	Basal_Epithelial_0dpa_vs_1dpa	DEG
ppib	0	-2.44761	0.454	0.972	0	Basal_Epithelial_0dpa_vs_1dpa	DEG
tes	0	-1.57454	0.119	0.713	0	Basal_Epithelial_0dpa_vs_1dpa	DEG
met	0	-1.82683	0.274	0.874	0	Basal_Epithelial_0dpa_vs_1dpa	DEG
pdia3	0	-2.29217	0.377	0.948	0	Basal_Epithelial_0dpa_vs_1dpa	DEG
dapk2b	0	1.97626	0.577	0.056	0	Basal_Epithelial_0dpa_vs_1dpa	DEG
mt-atp6	0	-1.2321	0.988	0.996	0	Basal_Epithelial_0dpa_vs_1dpa	DEG
mt-cyb	0	-0.598313	0.998	0.997	0	Basal_Epithelial_0dpa_vs_1dpa	DEG
angptl4	5.70005e-307	-1.45899	0.423	0.85	1.38967e-302	Basal_Epithelial_0dpa_vs_1dpa	DEG
pdlim3b	6.98229e-306	-1.74334	0.007	0.475	1.70228e-301	Basal_Epithelial_0dpa_vs_1dpa	DEG
rrbp1b	9.59941e-303	-1.3886	0.018	0.486	2.34034e-298	Basal_Epithelial_0dpa_vs_1dpa	DEG
psmb3	1.2265e-301	-1.28506	0.153	0.667	2.9902e-297	Basal_Epithelial_0dpa_vs_1dpa	DEG
psmb6	1.94591e-301	-1.24875	0.097	0.606	4.74412e-297	Basal_Epithelial_0dpa_vs_1dpa	DEG
cers5	6.50153e-301	1.74704	0.672	0.243	1.58507e-296	Basal_Epithelial_0dpa_vs_1dpa	DEG
cd74b	3.1942e-300	1.70247	0.811	0.477	7.78745e-296	Basal_Epithelial_0dpa_vs_1dpa	DEG
cited4a	9.24059e-300	1.90363	0.796	0.459	2.25286e-295	Basal_Epithelial_0dpa_vs_1dpa	DEG
lman1	9.59153e-300	-1.27037	0.061	0.554	2.33842e-295	Basal_Epithelial_0dpa_vs_1dpa	DEG
psmb4	6.90331e-299	-1.24302	0.123	0.638	1.68303e-294	Basal_Epithelial_0dpa_vs_1dpa	DEG
ripor1	1.04444e-298	-1.58114	0.067	0.555	2.54634e-294	Basal_Epithelial_0dpa_vs_1dpa	DEG
rai14	1.21501e-298	-1.3878	0.178	0.699	2.96219e-294	Basal_Epithelial_0dpa_vs_1dpa	DEG
col1a1b	2.78267e-298	-1.67656	0.815	0.952	6.78414e-294	Basal_Epithelial_0dpa_vs_1dpa	DEG
tnfrsf18	7.29729e-297	2.80086	0.499	0.062	1.77908e-292	Basal_Epithelial_0dpa_vs_1dpa	DEG
jam3b	2.1032e-294	-1.34747	0.004	0.453	5.1276e-290	Basal_Epithelial_0dpa_vs_1dpa	DEG
ctnna1	9.69671e-293	0.962187	0.965	0.922	2.36406e-288	Basal_Epithelial_0dpa_vs_1dpa	DEG
anxa11a	3.76342e-292	1.74951	0.893	0.778	9.17522e-288	Basal_Epithelial_0dpa_vs_1dpa	DEG
si:ch73-22o12.1	4.89861e-292	1.83325	0.813	0.515	1.19428e-287	Basal_Epithelial_0dpa_vs_1dpa	DEG
tmed2	1.22345e-291	-1.27916	0.323	0.791	2.98277e-287	Basal_Epithelial_0dpa_vs_1dpa	DEG
rpn1	3.59167e-290	-1.26828	0.15	0.649	8.7565e-286	Basal_Epithelial_0dpa_vs_1dpa	DEG
tmed10	4.92328e-290	-1.2571	0.331	0.795	1.20029e-285	Basal_Epithelial_0dpa_vs_1dpa	DEG
map7d1b	4.85058e-289	-1.28032	0.166	0.684	1.18257e-284	Basal_Epithelial_0dpa_vs_1dpa	DEG
sp6	8.04724e-288	-1.25637	0.016	0.465	1.96192e-283	Basal_Epithelial_0dpa_vs_1dpa	DEG
fndc3ba	8.46649e-286	-1.41069	0.175	0.687	2.06413e-281	Basal_Epithelial_0dpa_vs_1dpa	DEG
mt-nd1	9.4465e-284	-0.760933	0.966	0.992	2.30306e-279	Basal_Epithelial_0dpa_vs_1dpa	DEG
xbp1	1.79643e-283	1.1875	0.932	0.823	4.37969e-279	Basal_Epithelial_0dpa_vs_1dpa	DEG
htra1b	8.6035e-283	-1.18965	0.452	0.893	2.09753e-278	Basal_Epithelial_0dpa_vs_1dpa	DEG
rcn1	1.40921e-282	-1.33836	0.023	0.473	3.43566e-278	Basal_Epithelial_0dpa_vs_1dpa	DEG
gnai2a	2.19426e-282	-1.12979	0.516	0.907	5.3496e-278	Basal_Epithelial_0dpa_vs_1dpa	DEG
si:dkey-262k9.2	5.95256e-282	-1.3896	0.725	0.943	1.45123e-277	Basal_Epithelial_0dpa_vs_1dpa	DEG
robo1	1.15068e-281	-1.56183	0.147	0.631	2.80536e-277	Basal_Epithelial_0dpa_vs_1dpa	DEG
aspn	3.3504e-281	-1.51289	0.008	0.443	8.16828e-277	Basal_Epithelial_0dpa_vs_1dpa	DEG
atp2b1a	7.37082e-281	-1.62564	0.095	0.573	1.797e-276	Basal_Epithelial_0dpa_vs_1dpa	DEG
cdh29	1.96274e-280	1.51396	0.453	0.038	4.78517e-276	Basal_Epithelial_0dpa_vs_1dpa	DEG
dkk3b	3.73027e-279	-1.74911	0.029	0.478	9.09439e-275	Basal_Epithelial_0dpa_vs_1dpa	DEG
etv4	4.28548e-279	-1.22794	0.049	0.518	1.0448e-274	Basal_Epithelial_0dpa_vs_1dpa	DEG
lef1	9.98623e-279	-1.58014	0.009	0.445	2.43464e-274	Basal_Epithelial_0dpa_vs_1dpa	DEG
zdhhc8b	1.43274e-278	-1.31392	0.029	0.482	3.49303e-274	Basal_Epithelial_0dpa_vs_1dpa	DEG
canx	1.63594e-278	-1.11303	0.495	0.886	3.98841e-274	Basal_Epithelial_0dpa_vs_1dpa	DEG
mat2aa	7.31716e-278	1.6456	0.642	0.227	1.78392e-273	Basal_Epithelial_0dpa_vs_1dpa	DEG
znf827	5.99098e-277	-1.28536	0.098	0.582	1.4606e-272	Basal_Epithelial_0dpa_vs_1dpa	DEG
plpp3	1.0823e-276	-1.35491	0.037	0.487	2.63866e-272	Basal_Epithelial_0dpa_vs_1dpa	DEG
vcp	2.83557e-276	-1.1152	0.495	0.88	6.91312e-272	Basal_Epithelial_0dpa_vs_1dpa	DEG
fhl3a	1.08338e-274	1.72523	0.9	0.867	2.64128e-270	Basal_Epithelial_0dpa_vs_1dpa	DEG
traf4a	1.34611e-274	1.93588	0.767	0.464	3.28182e-270	Basal_Epithelial_0dpa_vs_1dpa	DEG
col11a1a	1.71837e-272	-1.88185	0.156	0.62	4.18939e-268	Basal_Epithelial_0dpa_vs_1dpa	DEG
osbpl3a	2.04984e-272	1.70848	0.774	0.482	4.99751e-268	Basal_Epithelial_0dpa_vs_1dpa	DEG
tnfrsf9a	2.26836e-272	-1.46297	0.431	0.88	5.53026e-268	Basal_Epithelial_0dpa_vs_1dpa	DEG
ppp2r5a	2.50138e-271	1.61876	0.466	0.056	6.09837e-267	Basal_Epithelial_0dpa_vs_1dpa	DEG
RAPH1	6.10808e-270	-1.28405	0.384	0.843	1.48915e-265	Basal_Epithelial_0dpa_vs_1dpa	DEG
pomp	6.67711e-270	-1.20885	0.134	0.617	1.62788e-265	Basal_Epithelial_0dpa_vs_1dpa	DEG
p3h1	9.20509e-270	-1.22327	0.046	0.499	2.2442e-265	Basal_Epithelial_0dpa_vs_1dpa	DEG
tmem258	1.62128e-269	-1.23655	0.264	0.742	3.95268e-265	Basal_Epithelial_0dpa_vs_1dpa	DEG
stmn1b	2.323e-268	-1.61245	0.001	0.416	5.66347e-264	Basal_Epithelial_0dpa_vs_1dpa	DEG
itga6b	3.00802e-268	0.930136	0.999	0.991	7.33356e-264	Basal_Epithelial_0dpa_vs_1dpa	DEG
psmd7	1.70934e-266	-1.17157	0.117	0.59	4.16736e-262	Basal_Epithelial_0dpa_vs_1dpa	DEG
cd151l	3.5333e-266	-1.12802	0.343	0.801	8.61419e-262	Basal_Epithelial_0dpa_vs_1dpa	DEG
palld	2.81593e-265	-0.884367	0.299	0.829	6.86523e-261	Basal_Epithelial_0dpa_vs_1dpa	DEG
dusp6	3.0161e-265	-1.3243	0.204	0.683	7.35326e-261	Basal_Epithelial_0dpa_vs_1dpa	DEG
epgn	6.34666e-265	2.00587	0.746	0.379	1.54732e-260	Basal_Epithelial_0dpa_vs_1dpa	DEG
MDFI	3.54428e-263	-1.36892	0.186	0.664	8.64096e-259	Basal_Epithelial_0dpa_vs_1dpa	DEG
cebpd	8.00134e-263	1.80075	0.583	0.161	1.95073e-258	Basal_Epithelial_0dpa_vs_1dpa	DEG
glsb	1.51898e-262	1.69415	0.807	0.561	3.70328e-258	Basal_Epithelial_0dpa_vs_1dpa	DEG
pkp3a	1.65358e-262	1.15516	0.986	0.97	4.03144e-258	Basal_Epithelial_0dpa_vs_1dpa	DEG
si:dkey-193p11.2	6.04102e-262	1.12225	0.99	0.951	1.4728e-257	Basal_Epithelial_0dpa_vs_1dpa	DEG
cox8a	7.62593e-262	-1.18848	0.309	0.764	1.8592e-257	Basal_Epithelial_0dpa_vs_1dpa	DEG
SGMS1	1.2482e-260	1.39736	0.827	0.593	3.04311e-256	Basal_Epithelial_0dpa_vs_1dpa	DEG
zgc:195173	1.70569e-260	-1.23182	0.264	0.738	4.15846e-256	Basal_Epithelial_0dpa_vs_1dpa	DEG
tubb2b	2.87035e-260	-1.15158	0.161	0.642	6.99791e-256	Basal_Epithelial_0dpa_vs_1dpa	DEG
sh3d19	3.37342e-260	-1.13514	0.419	0.855	8.2244e-256	Basal_Epithelial_0dpa_vs_1dpa	DEG
sult2st3	2.24928e-259	1.46426	0.394	0.018	5.48374e-255	Basal_Epithelial_0dpa_vs_1dpa	DEG
itga3a	2.68052e-259	-1.2304	0.294	0.768	6.5351e-255	Basal_Epithelial_0dpa_vs_1dpa	DEG
glrx	9.997e-258	-1.10094	0.078	0.533	2.43727e-253	Basal_Epithelial_0dpa_vs_1dpa	DEG
manf	5.0323e-257	-1.19051	0.182	0.658	1.22687e-252	Basal_Epithelial_0dpa_vs_1dpa	DEG
si:dkey-193c22.2	6.28021e-257	-1.17416	0.037	0.47	1.53112e-252	Basal_Epithelial_0dpa_vs_1dpa	DEG
sec11a	8.04423e-256	-1.11027	0.112	0.575	1.96118e-251	Basal_Epithelial_0dpa_vs_1dpa	DEG
si:dkey-79d12.5	2.24899e-255	1.45703	0.736	0.417	5.48304e-251	Basal_Epithelial_0dpa_vs_1dpa	DEG
atrx	1.40288e-254	-1.15339	0.21	0.691	3.42023e-250	Basal_Epithelial_0dpa_vs_1dpa	DEG
psma4	2.72021e-254	-1.13899	0.128	0.59	6.63187e-250	Basal_Epithelial_0dpa_vs_1dpa	DEG
pptc7a	2.18913e-253	1.43052	0.75	0.437	5.33711e-249	Basal_Epithelial_0dpa_vs_1dpa	DEG
copb1	2.49748e-253	-1.16956	0.219	0.686	6.08885e-249	Basal_Epithelial_0dpa_vs_1dpa	DEG
brd4	6.11775e-252	1.14159	0.87	0.738	1.49151e-247	Basal_Epithelial_0dpa_vs_1dpa	DEG
sipa1l1	5.01077e-251	-1.41763	0.093	0.542	1.22163e-246	Basal_Epithelial_0dpa_vs_1dpa	DEG
nrp1a	7.01261e-251	-1.40314	0.193	0.653	1.70967e-246	Basal_Epithelial_0dpa_vs_1dpa	DEG
doc2b	1.19081e-250	1.62256	0.585	0.177	2.9032e-246	Basal_Epithelial_0dpa_vs_1dpa	DEG
dusp2	1.43093e-250	-1.46904	0.147	0.612	3.48861e-246	Basal_Epithelial_0dpa_vs_1dpa	DEG
pdcd6	5.30224e-250	1.51253	0.871	0.728	1.29269e-245	Basal_Epithelial_0dpa_vs_1dpa	DEG
jpt1b	2.05304e-249	-1.08729	0.076	0.526	5.00532e-245	Basal_Epithelial_0dpa_vs_1dpa	DEG
ptmab	5.61311e-249	-1.11618	0.495	0.879	1.36848e-244	Basal_Epithelial_0dpa_vs_1dpa	DEG
spcs1	8.20482e-249	-1.14914	0.149	0.616	2.00033e-244	Basal_Epithelial_0dpa_vs_1dpa	DEG
h2az2b	1.74609e-247	-1.10774	0.12	0.585	4.25696e-243	Basal_Epithelial_0dpa_vs_1dpa	DEG
baiap2a	3.37527e-247	0.913825	0.985	0.948	8.22891e-243	Basal_Epithelial_0dpa_vs_1dpa	DEG
pfn2	4.34692e-247	-1.08314	0.497	0.862	1.05978e-242	Basal_Epithelial_0dpa_vs_1dpa	DEG
psmd8	6.90815e-247	-1.05866	0.056	0.488	1.68421e-242	Basal_Epithelial_0dpa_vs_1dpa	DEG
tmsb1	1.22772e-246	0.978779	0.973	0.924	2.99318e-242	Basal_Epithelial_0dpa_vs_1dpa	DEG
gstm.3	7.47032e-246	-1.20711	0.264	0.732	1.82126e-241	Basal_Epithelial_0dpa_vs_1dpa	DEG
fzd10	6.09747e-245	-1.16892	0.234	0.706	1.48656e-240	Basal_Epithelial_0dpa_vs_1dpa	DEG
si:ch211-207i1.2	2.99717e-244	1.10763	0.894	0.731	7.30709e-240	Basal_Epithelial_0dpa_vs_1dpa	DEG
si:ch211-250c4.4	3.242e-244	-1.23441	0.018	0.421	7.90401e-240	Basal_Epithelial_0dpa_vs_1dpa	DEG
calr	9.95467e-244	-1.13253	0.058	0.486	2.42695e-239	Basal_Epithelial_0dpa_vs_1dpa	DEG
pstpip2	1.7297e-243	1.63222	0.417	0.044	4.21701e-239	Basal_Epithelial_0dpa_vs_1dpa	DEG
fkbp14	1.3598e-242	-1.09728	0.018	0.419	3.31519e-238	Basal_Epithelial_0dpa_vs_1dpa	DEG
frem2a	1.78824e-242	-2.01702	0.004	0.388	4.35973e-238	Basal_Epithelial_0dpa_vs_1dpa	DEG
ywhaqa	3.08844e-242	-1.17357	0.337	0.773	7.52963e-238	Basal_Epithelial_0dpa_vs_1dpa	DEG
mt-nd2	2.40832e-241	-0.769917	0.923	0.979	5.87148e-237	Basal_Epithelial_0dpa_vs_1dpa	DEG
stat3	4.37047e-241	1.63598	0.716	0.404	1.06552e-236	Basal_Epithelial_0dpa_vs_1dpa	DEG
prdx2	4.48743e-240	-1.05607	0.088	0.528	1.09404e-235	Basal_Epithelial_0dpa_vs_1dpa	DEG
cdkn1bb	2.05797e-239	-1.18318	0.29	0.734	5.01732e-235	Basal_Epithelial_0dpa_vs_1dpa	DEG
cox4i1	7.11369e-239	-1.04774	0.421	0.833	1.73432e-234	Basal_Epithelial_0dpa_vs_1dpa	DEG
krt5	2.26191e-238	0.672602	1	0.999	5.51453e-234	Basal_Epithelial_0dpa_vs_1dpa	DEG
trib3	3.59285e-237	1.37093	0.68	0.321	8.75937e-233	Basal_Epithelial_0dpa_vs_1dpa	DEG
cbfb	1.3228e-236	-1.21518	0.163	0.62	3.22499e-232	Basal_Epithelial_0dpa_vs_1dpa	DEG
abi3bpb	4.19239e-236	2.44408	0.485	0.101	1.0221e-231	Basal_Epithelial_0dpa_vs_1dpa	DEG
zgc:162730	1.20792e-235	1.3349	0.91	0.701	2.9449e-231	Basal_Epithelial_0dpa_vs_1dpa	DEG
syne2b	1.73805e-235	1.19123	0.38	0.026	4.23736e-231	Basal_Epithelial_0dpa_vs_1dpa	DEG
mhc1zba	3.75603e-235	0.835637	0.972	0.951	9.1572e-231	Basal_Epithelial_0dpa_vs_1dpa	DEG
plekhn1	6.28484e-235	1.66847	0.698	0.394	1.53225e-230	Basal_Epithelial_0dpa_vs_1dpa	DEG
psmd1	7.18727e-235	-1.09164	0.171	0.623	1.75226e-230	Basal_Epithelial_0dpa_vs_1dpa	DEG
copb2	5.29173e-234	-1.09489	0.22	0.673	1.29012e-229	Basal_Epithelial_0dpa_vs_1dpa	DEG
rtn4a	7.20923e-234	-1.09931	0.381	0.8	1.75761e-229	Basal_Epithelial_0dpa_vs_1dpa	DEG
elf1	1.72633e-233	1.16917	0.889	0.792	4.2088e-229	Basal_Epithelial_0dpa_vs_1dpa	DEG
ptprz1a	2.33564e-233	-1.1338	0.05	0.462	5.69428e-229	Basal_Epithelial_0dpa_vs_1dpa	DEG
p3h2	8.37622e-233	-1.42868	0.019	0.404	2.04212e-228	Basal_Epithelial_0dpa_vs_1dpa	DEG
foxo1b	2.02897e-232	1.73593	0.483	0.099	4.94663e-228	Basal_Epithelial_0dpa_vs_1dpa	DEG
si:dkey-235d18.5	4.49963e-232	-1.0397	0.009	0.385	1.09701e-227	Basal_Epithelial_0dpa_vs_1dpa	DEG
copg2	3.55325e-231	-1.06342	0.157	0.604	8.66281e-227	Basal_Epithelial_0dpa_vs_1dpa	DEG
nocta	1.05858e-230	1.4267	0.728	0.415	2.58082e-226	Basal_Epithelial_0dpa_vs_1dpa	DEG
rps6ka3b	1.09437e-230	-1.34774	0.107	0.527	2.66807e-226	Basal_Epithelial_0dpa_vs_1dpa	DEG
chst11	7.5837e-230	-1.49328	0.083	0.491	1.84891e-225	Basal_Epithelial_0dpa_vs_1dpa	DEG
cpne1	1.6084e-228	-1.06734	0.21	0.654	3.92128e-224	Basal_Epithelial_0dpa_vs_1dpa	DEG
nucb1	5.59849e-228	-1.05702	0.183	0.631	1.36491e-223	Basal_Epithelial_0dpa_vs_1dpa	DEG
kif26ba	1.08871e-227	-1.3448	0.006	0.372	2.65428e-223	Basal_Epithelial_0dpa_vs_1dpa	DEG
copa	1.18069e-227	-1.09575	0.294	0.727	2.87853e-223	Basal_Epithelial_0dpa_vs_1dpa	DEG
zfhx3	1.44364e-227	-1.16316	0.467	0.842	3.51959e-223	Basal_Epithelial_0dpa_vs_1dpa	DEG
cox7a2a	7.40125e-227	-1.05486	0.12	0.555	1.80442e-222	Basal_Epithelial_0dpa_vs_1dpa	DEG
alpi.1	1.37722e-226	-1.91314	0.123	0.542	3.35765e-222	Basal_Epithelial_0dpa_vs_1dpa	DEG
f5	2.42345e-226	-1.30495	0.009	0.377	5.90838e-222	Basal_Epithelial_0dpa_vs_1dpa	DEG
ganab	6.18498e-226	-0.98252	0.058	0.462	1.5079e-221	Basal_Epithelial_0dpa_vs_1dpa	DEG
plod3	6.45566e-226	-1.01452	0.058	0.467	1.57389e-221	Basal_Epithelial_0dpa_vs_1dpa	DEG
cxcl8b.1	2.54356e-225	2.08869	0.433	0.066	6.20119e-221	Basal_Epithelial_0dpa_vs_1dpa	DEG
slc31a1	4.44763e-225	-1.02277	0.063	0.469	1.08433e-220	Basal_Epithelial_0dpa_vs_1dpa	DEG
kif13ba	1.20597e-223	-1.02789	0.11	0.543	2.94016e-219	Basal_Epithelial_0dpa_vs_1dpa	DEG
ENSDARG00000035679	5.18243e-223	-0.994078	0.072	0.484	1.26348e-218	Basal_Epithelial_0dpa_vs_1dpa	DEG
btg2	7.05613e-223	1.66925	0.729	0.436	1.72028e-218	Basal_Epithelial_0dpa_vs_1dpa	DEG
cfl1	4.2341e-221	-1.00032	0.094	0.518	1.03227e-216	Basal_Epithelial_0dpa_vs_1dpa	DEG
pxdn	2.00775e-220	-1.02711	0.016	0.386	4.89488e-216	Basal_Epithelial_0dpa_vs_1dpa	DEG
bcl2l10	3.52463e-220	-1.13664	0.12	0.546	8.59306e-216	Basal_Epithelial_0dpa_vs_1dpa	DEG
smarca4a	5.00521e-220	-0.99925	0.128	0.557	1.22027e-215	Basal_Epithelial_0dpa_vs_1dpa	DEG
lrpap1	9.41184e-220	-0.998482	0.079	0.49	2.29461e-215	Basal_Epithelial_0dpa_vs_1dpa	DEG
sun1	1.51883e-219	-1.18654	0.207	0.642	3.7029e-215	Basal_Epithelial_0dpa_vs_1dpa	DEG
lnx1	2.08584e-218	1.65125	0.776	0.58	5.08528e-214	Basal_Epithelial_0dpa_vs_1dpa	DEG
cebpb	1.40774e-217	1.09831	0.921	0.786	3.43207e-213	Basal_Epithelial_0dpa_vs_1dpa	DEG
cd99	1.54999e-217	-0.730884	0.888	0.982	3.77888e-213	Basal_Epithelial_0dpa_vs_1dpa	DEG
tob1b	4.08159e-217	1.31381	0.783	0.514	9.95093e-213	Basal_Epithelial_0dpa_vs_1dpa	DEG
metrnla	1.3597e-216	-1.21855	0.102	0.516	3.31496e-212	Basal_Epithelial_0dpa_vs_1dpa	DEG
sec31a	6.99183e-216	-1.12438	0.19	0.622	1.70461e-211	Basal_Epithelial_0dpa_vs_1dpa	DEG
nkain2	1.02592e-215	-1.4451	0.017	0.378	2.50119e-211	Basal_Epithelial_0dpa_vs_1dpa	DEG
sar1b	1.18332e-215	-1.0491	0.184	0.611	2.88493e-211	Basal_Epithelial_0dpa_vs_1dpa	DEG
itgb6	1.63019e-215	-1.13254	0.293	0.727	3.9744e-211	Basal_Epithelial_0dpa_vs_1dpa	DEG
fstl1a	4.59285e-215	-1.66931	0.003	0.351	1.11974e-210	Basal_Epithelial_0dpa_vs_1dpa	DEG
ptbp1b	7.04594e-215	-1.00322	0.295	0.732	1.7178e-210	Basal_Epithelial_0dpa_vs_1dpa	DEG
lima1a	9.01865e-215	1.48042	0.883	0.857	2.19875e-210	Basal_Epithelial_0dpa_vs_1dpa	DEG
s100u	1.6437e-214	-1.11483	0.122	0.531	4.00735e-210	Basal_Epithelial_0dpa_vs_1dpa	DEG
atp2a3	1.82133e-214	-1.13511	0.273	0.699	4.44041e-210	Basal_Epithelial_0dpa_vs_1dpa	DEG
psma8	1.87215e-214	-1.0021	0.116	0.533	4.5643e-210	Basal_Epithelial_0dpa_vs_1dpa	DEG
rhpn2	2.13617e-214	1.74458	0.624	0.301	5.20798e-210	Basal_Epithelial_0dpa_vs_1dpa	DEG
sgms1	1.15236e-213	-1.00913	0.04	0.422	2.80946e-209	Basal_Epithelial_0dpa_vs_1dpa	DEG
crtap	2.95774e-213	-0.989132	0.076	0.484	7.21096e-209	Basal_Epithelial_0dpa_vs_1dpa	DEG
fam169aa	5.13196e-212	1.08903	0.31	0.005	1.25117e-207	Basal_Epithelial_0dpa_vs_1dpa	DEG
tubb4b	1.03692e-211	-0.892318	0.704	0.921	2.52802e-207	Basal_Epithelial_0dpa_vs_1dpa	DEG
si:dkey-91f15.1	2.41904e-211	1.19636	0.351	0.026	5.89762e-207	Basal_Epithelial_0dpa_vs_1dpa	DEG
hdlbpa	1.00924e-210	-0.991061	0.541	0.868	2.46052e-206	Basal_Epithelial_0dpa_vs_1dpa	DEG
psmd12	1.27579e-210	-0.956616	0.076	0.475	3.11037e-206	Basal_Epithelial_0dpa_vs_1dpa	DEG
slc2a1b	2.13262e-210	1.42824	0.643	0.316	5.19932e-206	Basal_Epithelial_0dpa_vs_1dpa	DEG
cope	3.61482e-210	-1.03837	0.192	0.619	8.81292e-206	Basal_Epithelial_0dpa_vs_1dpa	DEG
nab1b	4.53185e-210	1.43495	0.484	0.123	1.10487e-205	Basal_Epithelial_0dpa_vs_1dpa	DEG
uba1	5.91144e-210	-1.02141	0.294	0.72	1.44121e-205	Basal_Epithelial_0dpa_vs_1dpa	DEG
spag1a	2.10506e-209	1.34908	0.691	0.401	5.13213e-205	Basal_Epithelial_0dpa_vs_1dpa	DEG
sec61b	2.2137e-209	-1.07438	0.277	0.699	5.39701e-205	Basal_Epithelial_0dpa_vs_1dpa	DEG
midn	3.58571e-209	1.10566	0.939	0.874	8.74195e-205	Basal_Epithelial_0dpa_vs_1dpa	DEG
nfixa	8.8683e-208	1.41503	0.645	0.306	2.16209e-203	Basal_Epithelial_0dpa_vs_1dpa	DEG
reep3b	1.06034e-207	0.99381	0.892	0.835	2.58511e-203	Basal_Epithelial_0dpa_vs_1dpa	DEG
[truncated: 21,274 more rows]

## Sheet: Table S2D
Supplementary Table S2 Stage DEGs identified in each cell type and GO term enrichement results of shared/dynamic modules
[truncated: 3,692 more rows]

[truncated: 5 more sheets: Table S2E, Table S2F, Table S2G, Table S2H, Table S2I]
