# Supplementary material for: Common and specific gene regulatory programs in zebrafish caudal fin regeneration at single-cell resolution
Source: HighWire-hosted journal article supplement (doi:10.1101/gr.279372.124), 2025-01-01
Supplement: Supplemental_Table_S3.xlsx [file Supplemental_Table_S3.xlsx]

## Sheet: Table S3A
Supplementary Table S3. Differentially accessible regions identified between stages within each major cell type
A. stage DARs in SE
region	p_val	avg_log2FC	pct.1	pct.2	p_val_adj	comparison	distance	compare	category
chr5-34851412-34852654	8.26055e-143	-2.99735	0.036	0.296	1.69946e-137	arhgef28a	0	Superficial_Epithelial_0dpa_vs_1dpa	DAR
chr5-69408507-69409397	2.56684e-140	-3.16212	0.032	0.279	5.28081e-135	FQ311924.1	8064	Superficial_Epithelial_0dpa_vs_1dpa	DAR
chr25-36005530-36007123	2.19149e-139	-4.75586	0.008	0.2	4.5086e-134	rbl2	3691	Superficial_Epithelial_0dpa_vs_1dpa	DAR
chr1-1503986-1504737	1.43482e-133	-5.74363	0.004	0.176	2.95187e-128	dre-mir-459	70745	Superficial_Epithelial_0dpa_vs_1dpa	DAR
chr5-59308895-59309937	5.81016e-133	-3.75458	0.018	0.232	1.19534e-127	rasa4	0	Superficial_Epithelial_0dpa_vs_1dpa	DAR
chr1-21607525-21608937	1.18549e-130	-5.57649	0.004	0.179	2.43894e-125	zcchc7	1533	Superficial_Epithelial_0dpa_vs_1dpa	DAR
chr12-24324865-24326551	1.7025e-128	-3.35363	0.029	0.248	3.50259e-123	nrxn1a	15751	Superficial_Epithelial_0dpa_vs_1dpa	DAR
chr16-45266578-45267600	2.83118e-123	-3.94646	0.012	0.201	5.82465e-118	FP016247.1	0	Superficial_Epithelial_0dpa_vs_1dpa	DAR
chr4-12924448-12925137	1.8163e-120	-3.94236	0.013	0.204	3.73672e-115	lemd3	0	Superficial_Epithelial_0dpa_vs_1dpa	DAR
chr2-41760535-41761662	2.14995e-118	-3.10198	0.029	0.251	4.42313e-113	SSBP4	37047	Superficial_Epithelial_0dpa_vs_1dpa	DAR
chr17-41070390-41071672	1.67573e-117	-5.66389	0.004	0.155	3.44752e-112	rbks	0	Superficial_Epithelial_0dpa_vs_1dpa	DAR
chr24-8527587-8528438	5.02844e-115	-3.01077	0.03	0.252	1.03451e-109	slc35b3	115060	Superficial_Epithelial_0dpa_vs_1dpa	DAR
chr7-39423861-39425641	5.8731e-115	-2.65381	0.054	0.298	1.20829e-109	lsp1b	0	Superficial_Epithelial_0dpa_vs_1dpa	DAR
chr7-37258543-37259918	1.55532e-110	-4.65106	0.007	0.166	3.19978e-105	sall1a	99085	Superficial_Epithelial_0dpa_vs_1dpa	DAR
chr13-46155295-46155929	1.98501e-110	-3.36449	0.022	0.227	4.08381e-105	marcksl1a	21548	Superficial_Epithelial_0dpa_vs_1dpa	DAR
chr9-20449766-20451104	2.98648e-109	-3.23773	0.021	0.216	6.14414e-104	CR456628.1	13250	Superficial_Epithelial_0dpa_vs_1dpa	DAR
chr18-8408701-8410424	9.97331e-109	-4.53508	0.007	0.17	2.05183e-103	prpf18	182	Superficial_Epithelial_0dpa_vs_1dpa	DAR
chr8-40264451-40265759	9.39694e-107	-4.12368	0.011	0.178	1.93325e-101	kdm2ba	0	Superficial_Epithelial_0dpa_vs_1dpa	DAR
chr23-20815443-20816732	6.43979e-106	-4.14689	0.009	0.179	1.32487e-100	zgc:154075	958	Superficial_Epithelial_0dpa_vs_1dpa	DAR
chr6-12883949-12885182	2.04923e-105	-4.3663	0.007	0.163	4.21591e-100	ical1	0	Superficial_Epithelial_0dpa_vs_1dpa	DAR
chr11-407132-408642	3.90433e-105	-3.89496	0.014	0.19	8.03247e-100	znf831	2227	Superficial_Epithelial_0dpa_vs_1dpa	DAR
chr5-59289485-59290560	7.50205e-105	-2.46073	0.046	0.279	1.54341e-99	rasa4	0	Superficial_Epithelial_0dpa_vs_1dpa	DAR
chr1-21616610-21618248	2.2812e-102	-4.08347	0.01	0.172	4.69316e-97	zcchc7	0	Superficial_Epithelial_0dpa_vs_1dpa	DAR
chr7-32788574-32790143	1.13855e-101	-3.94947	0.011	0.178	2.34237e-96	gas2b	6143	Superficial_Epithelial_0dpa_vs_1dpa	DAR
chr23-18816340-18818300	2.78862e-99	-3.8478	0.012	0.176	5.73708e-94	nsfl1c	10684	Superficial_Epithelial_0dpa_vs_1dpa	DAR
chr17-41033892-41035084	1.11174e-98	-5.18049	0.004	0.149	2.28721e-93	rbks	0	Superficial_Epithelial_0dpa_vs_1dpa	DAR
chr20-24084750-24085600	9.14612e-98	-2.53216	0.047	0.263	1.88165e-92	bach2b	0	Superficial_Epithelial_0dpa_vs_1dpa	DAR
chr24-7458573-7459754	1.87771e-97	-3.63992	0.015	0.186	3.86306e-92	kmt2ca	0	Superficial_Epithelial_0dpa_vs_1dpa	DAR
chr6-14286489-14287794	4.7858e-96	-3.27929	0.018	0.192	9.84593e-91	inpp4ab	0	Superficial_Epithelial_0dpa_vs_1dpa	DAR
chr23-10347536-10348891	1.11479e-95	-2.57555	0.039	0.256	2.29348e-90	krt18a.1	0	Superficial_Epithelial_0dpa_vs_1dpa	DAR
chr23-25568971-25569987	1.04576e-94	-2.3803	0.056	0.292	2.15147e-89	lrp1ab	0	Superficial_Epithelial_0dpa_vs_1dpa	DAR
chr23-31293574-31294826	1.28111e-93	-4.07991	0.01	0.155	2.63565e-88	phip	0	Superficial_Epithelial_0dpa_vs_1dpa	DAR
chr18-5400325-5401349	1.39035e-93	-3.23931	0.02	0.203	2.86039e-88	CABZ01084603.1	7657	Superficial_Epithelial_0dpa_vs_1dpa	DAR
chr1-46818492-46819367	4.38944e-93	-3.60201	0.013	0.176	9.03049e-88	CU986305.1	8523	Superficial_Epithelial_0dpa_vs_1dpa	DAR
chr22-16144585-16145212	1.12634e-91	-2.60642	0.04	0.242	2.31723e-86	slc30a7	0	Superficial_Epithelial_0dpa_vs_1dpa	DAR
chr14-40735244-40736451	7.72779e-90	-2.1345	0.066	0.306	1.58985e-84	elf1	9381	Superficial_Epithelial_0dpa_vs_1dpa	DAR
chr2-41828303-41829647	1.19602e-89	-1.93712	0.08	0.333	2.46059e-84	keap1a	5377	Superficial_Epithelial_0dpa_vs_1dpa	DAR
chr7-55303245-55304307	1.64141e-89	-3.78784	0.012	0.165	3.37691e-84	ctu2	0	Superficial_Epithelial_0dpa_vs_1dpa	DAR
chr18-25869959-25870795	3.29178e-89	-3.8656	0.011	0.167	6.77225e-84	sema4ba	0	Superficial_Epithelial_0dpa_vs_1dpa	DAR
chr7-19345324-19346428	8.80059e-89	-2.73644	0.04	0.238	1.81056e-83	ntn4	0	Superficial_Epithelial_0dpa_vs_1dpa	DAR
chr6-27593961-27594771	1.30187e-88	-3.22055	0.018	0.181	2.67836e-83	ryk	0	Superficial_Epithelial_0dpa_vs_1dpa	DAR
chr18-49895141-49896160	3.84058e-88	-5.61628	0.002	0.12	7.90131e-83	mob2b	73407	Superficial_Epithelial_0dpa_vs_1dpa	DAR
chr16-7618265-7619473	4.94298e-88	-3.72784	0.012	0.162	1.01693e-82	CT574585.1	0	Superficial_Epithelial_0dpa_vs_1dpa	DAR
chr3-48541647-48542450	1.06494e-87	-4.85249	0.005	0.133	2.19092e-82	atp5pd	6843	Superficial_Epithelial_0dpa_vs_1dpa	DAR
chr12-1474090-1475086	1.14095e-86	-2.53953	0.039	0.247	2.34731e-81	usp22	0	Superficial_Epithelial_0dpa_vs_1dpa	DAR
chr1-16434109-16434846	4.4923e-86	-2.96673	0.024	0.205	9.24209e-81	micu3a	0	Superficial_Epithelial_0dpa_vs_1dpa	DAR
chr24-28482733-28483485	4.67965e-86	-2.21965	0.057	0.281	9.62753e-81	arhgap29a	0	Superficial_Epithelial_0dpa_vs_1dpa	DAR
chr6-14048207-14049222	9.77017e-85	-1.93827	0.075	0.319	2.01004e-79	etv5b	8045	Superficial_Epithelial_0dpa_vs_1dpa	DAR
chr8-2364957-2365663	1.43051e-84	-3.30605	0.016	0.162	2.94301e-79	ikbkb	0	Superficial_Epithelial_0dpa_vs_1dpa	DAR
chr9-9093439-9094735	6.56096e-84	-1.78929	0.097	0.359	1.3498e-78	sik1	17423	Superficial_Epithelial_0dpa_vs_1dpa	DAR
chr9-28980317-28980926	5.54517e-83	-3.22956	0.019	0.174	1.14082e-77	ptpn4a	0	Superficial_Epithelial_0dpa_vs_1dpa	DAR
chr23-18836351-18837978	7.70185e-83	-3.40576	0.019	0.178	1.58452e-77	nsfl1c	30695	Superficial_Epithelial_0dpa_vs_1dpa	DAR
chr10-33014084-33015694	6.26206e-82	-4.23515	0.007	0.132	1.28831e-76	cux1a	0	Superficial_Epithelial_0dpa_vs_1dpa	DAR
chr16-50059707-50060647	3.15321e-80	-3.97095	0.01	0.141	6.48715e-75	ube2e2	0	Superficial_Epithelial_0dpa_vs_1dpa	DAR
chr20-23576929-23578134	5.16199e-80	-3.55983	0.016	0.164	1.06199e-74	palld	0	Superficial_Epithelial_0dpa_vs_1dpa	DAR
chr3-35816251-35816789	1.38898e-79	-3.44048	0.015	0.16	2.85757e-74	crlf3	0	Superficial_Epithelial_0dpa_vs_1dpa	DAR
chr5-9016262-9017484	2.83646e-78	-4.76907	0.004	0.123	5.83552e-73	tnksb	0	Superficial_Epithelial_0dpa_vs_1dpa	DAR
chr1-55202178-55203274	3.2635e-78	-2.25448	0.049	0.249	6.71406e-73	mri1	0	Superficial_Epithelial_0dpa_vs_1dpa	DAR
chr25-35998638-35999432	4.01308e-78	-4.24141	0.008	0.138	8.25618e-73	sall1b	2496	Superficial_Epithelial_0dpa_vs_1dpa	DAR
chr20-3243748-3244867	2.41357e-77	-2.92625	0.022	0.188	4.96549e-72	rps6kc1	0	Superficial_Epithelial_0dpa_vs_1dpa	DAR
chr9-12492910-12493861	1.48527e-76	-1.6852	0.108	0.363	3.05567e-71	igf2bp2a	0	Superficial_Epithelial_0dpa_vs_1dpa	DAR
chr3-54799714-54800891	2.13868e-76	-3.94286	0.01	0.139	4.39995e-71	sc:d0202	0	Superficial_Epithelial_0dpa_vs_1dpa	DAR
chr13-23188629-23190230	2.87788e-76	-2.29649	0.043	0.239	5.92072e-71	sorbs1	0	Superficial_Epithelial_0dpa_vs_1dpa	DAR
chr4-12859950-12860771	8.07084e-76	-4.76384	0.004	0.115	1.66043e-70	hmga2	0	Superficial_Epithelial_0dpa_vs_1dpa	DAR
chr6-53244146-53245313	1.16611e-75	-1.82265	0.086	0.319	2.39907e-70	rbm5	18540	Superficial_Epithelial_0dpa_vs_1dpa	DAR
chr12-19809226-19810050	1.53102e-75	-2.20862	0.051	0.252	3.1498e-70	shisa9a	0	Superficial_Epithelial_0dpa_vs_1dpa	DAR
chr10-36783493-36784893	1.53882e-75	1.69404	0.227	0.083	3.16585e-70	dhrs13a.2	0	Superficial_Epithelial_0dpa_vs_1dpa	DAR
chr1-22860957-22862158	2.03482e-75	-2.28176	0.046	0.249	4.18628e-70	BX908795.1	0	Superficial_Epithelial_0dpa_vs_1dpa	DAR
chr17-28597435-28598616	3.91412e-75	-3.51238	0.015	0.161	8.0526e-70	im:7136021	8800	Superficial_Epithelial_0dpa_vs_1dpa	DAR
chr19-34979239-34980238	3.96775e-75	-3.94771	0.009	0.138	8.16293e-70	ndrg1a	0	Superficial_Epithelial_0dpa_vs_1dpa	DAR
chr19-22054908-22055765	5.82958e-75	-1.87212	0.069	0.287	1.19933e-69	sall3b	6436	Superficial_Epithelial_0dpa_vs_1dpa	DAR
chr21-20127642-20128729	2.61424e-74	-3.54972	0.014	0.148	5.37833e-69	dusp4	7098	Superficial_Epithelial_0dpa_vs_1dpa	DAR
chr6-43189587-43191374	9.0102e-74	-3.33822	0.016	0.163	1.85369e-68	si:dkey-178o16.4	27476	Superficial_Epithelial_0dpa_vs_1dpa	DAR
chr20-26422245-26423232	1.62561e-73	-3.03966	0.018	0.167	3.3444e-68	akap12b	0	Superficial_Epithelial_0dpa_vs_1dpa	DAR
chr17-37834534-37835834	2.20542e-73	-3.73112	0.011	0.138	4.53726e-68	zfp36l1a	38668	Superficial_Epithelial_0dpa_vs_1dpa	DAR
chr8-37096731-37097374	2.61336e-73	-3.49083	0.013	0.146	5.37652e-68	zgc:162200	0	Superficial_Epithelial_0dpa_vs_1dpa	DAR
chr17-43808480-43809364	2.7272e-73	-3.66495	0.01	0.14	5.61072e-68	FO704777.1	34171	Superficial_Epithelial_0dpa_vs_1dpa	DAR
chr24-24045976-24046821	3.43221e-73	1.35389	0.283	0.131	7.06115e-68	abcc13	0	Superficial_Epithelial_0dpa_vs_1dpa	DAR
chr8-43655902-43656744	4.25173e-73	-3.15935	0.016	0.161	8.74716e-68	ep400	11731	Superficial_Epithelial_0dpa_vs_1dpa	DAR
chr3-37689545-37691304	1.24622e-72	-3.76853	0.009	0.136	2.56388e-67	gpatch8	0	Superficial_Epithelial_0dpa_vs_1dpa	DAR
chr16-30717304-30718763	1.77908e-72	-1.43052	0.134	0.384	3.66014e-67	ptk2ab	16662	Superficial_Epithelial_0dpa_vs_1dpa	DAR
chr16-17066214-17067372	1.1816e-71	-2.9332	0.023	0.17	2.43093e-66	tnfrsf1a	0	Superficial_Epithelial_0dpa_vs_1dpa	DAR
chr19-29091890-29092895	1.44772e-71	-4.09082	0.008	0.13	2.97842e-66	CU469458.1	110246	Superficial_Epithelial_0dpa_vs_1dpa	DAR
chr18-35769592-35770446	5.5379e-71	-3.07625	0.022	0.173	1.13932e-65	rasgrp4	0	Superficial_Epithelial_0dpa_vs_1dpa	DAR
chr25-30867579-30868188	5.06945e-70	-5.30752	0.003	0.104	1.04295e-64	CR753816.1	28315	Superficial_Epithelial_0dpa_vs_1dpa	DAR
chr2-40096480-40097874	6.94348e-70	-2.62848	0.033	0.206	1.4285e-64	epha4a	0	Superficial_Epithelial_0dpa_vs_1dpa	DAR
chr4-21595018-21595873	1.06608e-69	-3.15879	0.016	0.151	2.19326e-64	ppp1r12a	10859	Superficial_Epithelial_0dpa_vs_1dpa	DAR
chr9-12552030-12553309	1.5466e-69	-2.49361	0.034	0.201	3.18185e-64	igf2bp2a	0	Superficial_Epithelial_0dpa_vs_1dpa	DAR
chr23-22526226-22526738	5.4087e-69	-2.20386	0.049	0.24	1.11274e-63	spsb1	2922	Superficial_Epithelial_0dpa_vs_1dpa	DAR
chr20-23731613-23732949	5.87903e-69	-3.86815	0.009	0.123	1.2095e-63	sh3rf1	9624	Superficial_Epithelial_0dpa_vs_1dpa	DAR
chr1-29682073-29682913	9.36783e-69	-2.61416	0.027	0.18	1.92726e-63	raph1b	0	Superficial_Epithelial_0dpa_vs_1dpa	DAR
chr9-28974124-28975181	1.63308e-68	-3.7609	0.009	0.129	3.35976e-63	ptpn4a	0	Superficial_Epithelial_0dpa_vs_1dpa	DAR
chr24-1507085-1507802	4.56472e-68	-3.81049	0.01	0.124	9.3911e-63	BX323074.1	71124	Superficial_Epithelial_0dpa_vs_1dpa	DAR
chr8-24850770-24851511	5.98364e-68	-3.12413	0.017	0.161	1.23103e-62	slc6a17	3088	Superficial_Epithelial_0dpa_vs_1dpa	DAR
chr1-1502215-1503177	7.28044e-68	-4.00846	0.009	0.13	1.49782e-62	dre-mir-459	72305	Superficial_Epithelial_0dpa_vs_1dpa	DAR
chr20-24112798-24113581	1.05932e-67	-2.95337	0.023	0.17	2.17936e-62	bach2b	0	Superficial_Epithelial_0dpa_vs_1dpa	DAR
chr24-31206205-31206943	1.72398e-67	-2.04457	0.059	0.264	3.54678e-62	alg14	0	Superficial_Epithelial_0dpa_vs_1dpa	DAR
chr15-25610016-25611274	1.79728e-67	-4.36746	0.005	0.115	3.69758e-62	taok1a	0	Superficial_Epithelial_0dpa_vs_1dpa	DAR
chr18-15030955-15032243	1.98508e-67	-4.15824	0.006	0.123	4.08394e-62	btbd11b	0	Superficial_Epithelial_0dpa_vs_1dpa	DAR
chr3-25780539-25781651	2.80336e-66	-3.17742	0.016	0.152	5.76741e-61	ntn1b	0	Superficial_Epithelial_0dpa_vs_1dpa	DAR
chr14-24426309-24427869	3.57969e-66	-2.06128	0.058	0.245	7.36456e-61	cxcl14	15635	Superficial_Epithelial_0dpa_vs_1dpa	DAR
chr5-13488870-13489515	3.58875e-66	-2.62015	0.026	0.18	7.38321e-61	cnnm4b	0	Superficial_Epithelial_0dpa_vs_1dpa	DAR
chr23-27478946-27480472	5.41081e-66	-2.3897	0.041	0.213	1.11318e-60	atf7a	0	Superficial_Epithelial_0dpa_vs_1dpa	DAR
chr22-29420447-29421181	8.47114e-66	-1.89981	0.07	0.271	1.74278e-60	pdgfba	84137	Superficial_Epithelial_0dpa_vs_1dpa	DAR
chr7-66116017-66117064	1.29662e-65	-3.0209	0.02	0.159	2.66756e-60	btbd10b	0	Superficial_Epithelial_0dpa_vs_1dpa	DAR
chr6-19020230-19021074	2.76362e-65	-4.53323	0.004	0.105	5.68566e-60	sept9b	0	Superficial_Epithelial_0dpa_vs_1dpa	DAR
chr15-35924360-35925675	3.38552e-65	-2.95624	0.025	0.17	6.9651e-60	irs1	0	Superficial_Epithelial_0dpa_vs_1dpa	DAR
chr13-605185-606952	7.07929e-65	-2.45554	0.028	0.172	1.45644e-59	slit1a	0	Superficial_Epithelial_0dpa_vs_1dpa	DAR
chr17-53310530-53311946	2.57724e-64	1.2905	0.264	0.133	5.30221e-59	asb2b	0	Superficial_Epithelial_0dpa_vs_1dpa	DAR
chr11-4110129-4111071	4.19382e-64	1.62483	0.196	0.079	8.62803e-59	BX571768.1	0	Superficial_Epithelial_0dpa_vs_1dpa	DAR
chr12-34300456-34302576	5.20665e-64	-2.43034	0.032	0.193	1.07117e-58	CU855552.1	5157	Superficial_Epithelial_0dpa_vs_1dpa	DAR
chr16-22963163-22964223	7.53385e-64	-2.22804	0.043	0.212	1.54995e-58	si:dkey-246i14.3	0	Superficial_Epithelial_0dpa_vs_1dpa	DAR
chr21-19891176-19892100	9.84515e-64	-2.66802	0.028	0.178	2.02546e-58	mfhas1	0	Superficial_Epithelial_0dpa_vs_1dpa	DAR
chr6-25701642-25703323	6.16695e-63	-3.42986	0.012	0.13	1.26874e-57	BX248113.1	104816	Superficial_Epithelial_0dpa_vs_1dpa	DAR
chr9-12487038-12487627	1.04379e-62	-2.99798	0.019	0.153	2.14742e-57	igf2bp2a	0	Superficial_Epithelial_0dpa_vs_1dpa	DAR
chr5-68229860-68230832	1.10199e-62	-2.41783	0.031	0.182	2.26714e-57	KIF1C	0	Superficial_Epithelial_0dpa_vs_1dpa	DAR
chr5-19040096-19041323	1.24355e-62	1.48264	0.213	0.099	2.55837e-57	fam214b	0	Superficial_Epithelial_0dpa_vs_1dpa	DAR
chr18-8492209-8493654	1.71879e-62	-4.68922	0.003	0.103	3.5361e-57	FRMD4A	9715	Superficial_Epithelial_0dpa_vs_1dpa	DAR
chr7-66901530-66902802	2.72374e-62	-2.92138	0.021	0.158	5.6036e-57	sbf2	0	Superficial_Epithelial_0dpa_vs_1dpa	DAR
chr22-26579847-26580809	3.8308e-62	-2.67022	0.023	0.166	7.88119e-57	CABZ01072309.2	0	Superficial_Epithelial_0dpa_vs_1dpa	DAR
chr8-19200068-19200909	1.11409e-61	-2.6313	0.027	0.176	2.29204e-56	si:ch73-222f22.2	12957	Superficial_Epithelial_0dpa_vs_1dpa	DAR
chr21-24586432-24589640	1.221e-61	-2.26686	0.038	0.211	2.51199e-56	arhgap32b	0	Superficial_Epithelial_0dpa_vs_1dpa	DAR
chr17-23567687-23568796	1.86679e-61	-1.93057	0.058	0.247	3.84059e-56	pank1a	0	Superficial_Epithelial_0dpa_vs_1dpa	DAR
chr7-37304839-37305323	1.88281e-61	-3.71259	0.01	0.117	3.87354e-56	sall1a	53680	Superficial_Epithelial_0dpa_vs_1dpa	DAR
chr4-8138709-8139854	4.61619e-61	-2.09614	0.05	0.223	9.49697e-56	wnk1b	0	Superficial_Epithelial_0dpa_vs_1dpa	DAR
chr19-892752-894213	1.36232e-60	-3.10189	0.016	0.142	2.80273e-55	eomesa	17863	Superficial_Epithelial_0dpa_vs_1dpa	DAR
chr23-15605093-15607446	1.42301e-60	-2.98844	0.018	0.147	2.92758e-55	BX005011.1	121213	Superficial_Epithelial_0dpa_vs_1dpa	DAR
chr8-19090989-19092012	1.43196e-60	-2.56657	0.032	0.185	2.946e-55	sema6bb	39082	Superficial_Epithelial_0dpa_vs_1dpa	DAR
chr13-47431916-47432985	1.53491e-60	-2.34083	0.035	0.196	3.15779e-55	acoxl	0	Superficial_Epithelial_0dpa_vs_1dpa	DAR
chr15-3709153-3709846	1.86452e-60	-3.87605	0.008	0.112	3.83592e-55	lpar6a	0	Superficial_Epithelial_0dpa_vs_1dpa	DAR
chr13-14059511-14060606	2.21136e-60	-3.03108	0.016	0.136	4.54948e-55	atrn	0	Superficial_Epithelial_0dpa_vs_1dpa	DAR
chr21-24606908-24608671	6.20524e-60	-2.82338	0.02	0.151	1.27662e-54	arhgap32b	0	Superficial_Epithelial_0dpa_vs_1dpa	DAR
chr18-1681540-1682571	6.84521e-60	-2.37666	0.033	0.188	1.40828e-54	slitrk3a	21412	Superficial_Epithelial_0dpa_vs_1dpa	DAR
chr24-4260230-4260974	7.58978e-60	-2.45415	0.032	0.179	1.56146e-54	BX004842.1	57204	Superficial_Epithelial_0dpa_vs_1dpa	DAR
chr1-44555457-44556296	1.02685e-59	-2.62014	0.026	0.169	2.11256e-54	zdhhc5a	0	Superficial_Epithelial_0dpa_vs_1dpa	DAR
chr25-35995768-35996550	1.30568e-59	-2.40766	0.035	0.199	2.68621e-54	sall1b	0	Superficial_Epithelial_0dpa_vs_1dpa	DAR
chr13-36342323-36343185	1.32611e-59	-1.9975	0.051	0.224	2.72823e-54	actn1	0	Superficial_Epithelial_0dpa_vs_1dpa	DAR
chr3-37687018-37687936	2.865e-59	-1.64999	0.078	0.274	5.89421e-54	gpatch8	0	Superficial_Epithelial_0dpa_vs_1dpa	DAR
chr6-24427861-24428483	3.24361e-59	-2.96988	0.019	0.145	6.67315e-54	tgfbr3	0	Superficial_Epithelial_0dpa_vs_1dpa	DAR
chr14-2563268-2564143	3.72403e-59	-3.95588	0.006	0.112	7.66152e-54	fbxw11a	0	Superficial_Epithelial_0dpa_vs_1dpa	DAR
chr17-37843671-37845201	3.90373e-59	-3.24285	0.014	0.127	8.03123e-54	zfp36l1a	47805	Superficial_Epithelial_0dpa_vs_1dpa	DAR
chr7-23911986-23913072	4.95714e-59	-2.16801	0.045	0.211	1.01984e-53	syt4	0	Superficial_Epithelial_0dpa_vs_1dpa	DAR
chr23-40912755-40913483	9.49758e-59	-4.60984	0.004	0.103	1.95396e-53	LO017845.1	0	Superficial_Epithelial_0dpa_vs_1dpa	DAR
chr7-10789505-10790655	1.3481e-58	-1.50153	0.104	0.328	2.77347e-53	arnt2	0	Superficial_Epithelial_0dpa_vs_1dpa	DAR
chr22-16694544-16695732	1.37132e-58	-2.81031	0.019	0.143	2.82124e-53	patj	0	Superficial_Epithelial_0dpa_vs_1dpa	DAR
chr16-30671492-30673231	2.76057e-58	-3.34095	0.013	0.122	5.67938e-53	ldlrad4b	15511	Superficial_Epithelial_0dpa_vs_1dpa	DAR
chr17-10520815-10521960	6.33012e-58	-3.58409	0.009	0.115	1.30231e-52	tyro3	0	Superficial_Epithelial_0dpa_vs_1dpa	DAR
chr4-3054203-3055181	6.70837e-58	-3.78741	0.009	0.113	1.38013e-52	plekha5	0	Superficial_Epithelial_0dpa_vs_1dpa	DAR
chr19-24716251-24717434	8.21794e-58	-2.40413	0.031	0.176	1.69069e-52	myo1g	0	Superficial_Epithelial_0dpa_vs_1dpa	DAR
chr12-48509718-48510096	9.86145e-58	-1.91515	0.055	0.224	2.02882e-52	arhgap44	0	Superficial_Epithelial_0dpa_vs_1dpa	DAR
chr1-8646567-8650289	1.18184e-57	0.831218	0.396	0.28	2.43142e-52	actb1	0	Superficial_Epithelial_0dpa_vs_1dpa	DAR
chr3-52095468-52096095	2.02757e-57	-3.62275	0.008	0.106	4.17136e-52	FUT9	0	Superficial_Epithelial_0dpa_vs_1dpa	DAR
chr12-48355431-48356832	2.26748e-57	-2.93587	0.021	0.154	4.66494e-52	dnajb12b	0	Superficial_Epithelial_0dpa_vs_1dpa	DAR
chr12-35745921-35746776	2.78224e-57	-3.31987	0.011	0.121	5.72396e-52	aatkb	0	Superficial_Epithelial_0dpa_vs_1dpa	DAR
chr11-11451752-11453380	8.21519e-57	-2.67403	0.021	0.146	1.69013e-51	BX324177.1	0	Superficial_Epithelial_0dpa_vs_1dpa	DAR
chr24-8655461-8656127	8.24693e-57	-3.48724	0.009	0.107	1.69666e-51	tfap2a	65548	Superficial_Epithelial_0dpa_vs_1dpa	DAR
chr14-27945651-27946202	1.32769e-56	-3.69545	0.008	0.105	2.73148e-51	tsc22d3	52553	Superficial_Epithelial_0dpa_vs_1dpa	DAR
chr10-37932765-37933425	1.60102e-56	-1.60084	0.094	0.304	3.2938e-51	bhlha9	4639	Superficial_Epithelial_0dpa_vs_1dpa	DAR
chr18-39225620-39226760	1.69234e-56	-3.13294	0.018	0.141	3.48169e-51	mapk6	0	Superficial_Epithelial_0dpa_vs_1dpa	DAR
chr16-38721176-38722127	1.80339e-56	-4.39147	0.005	0.1	3.71016e-51	emc2	0	Superficial_Epithelial_0dpa_vs_1dpa	DAR
chr23-23388689-23390117	3.28054e-56	-2.84408	0.022	0.148	6.74911e-51	her9	9402	Superficial_Epithelial_0dpa_vs_1dpa	DAR
chr24-15186996-15187985	5.6864e-56	-2.13857	0.042	0.212	1.16987e-50	rttn	0	Superficial_Epithelial_0dpa_vs_1dpa	DAR
chr1-16452222-16452952	5.74872e-56	-2.70091	0.022	0.152	1.1827e-50	micu3a	0	Superficial_Epithelial_0dpa_vs_1dpa	DAR
chr5-32665290-32666578	7.07476e-56	-2.99311	0.016	0.141	1.45551e-50	CR376857.2	0	Superficial_Epithelial_0dpa_vs_1dpa	DAR
chr24-7470084-7470732	8.20324e-56	-2.96116	0.016	0.127	1.68767e-50	kmt2ca	0	Superficial_Epithelial_0dpa_vs_1dpa	DAR
chr5-8477740-8478559	2.52442e-55	-3.44359	0.012	0.119	5.19354e-50	lifra	0	Superficial_Epithelial_0dpa_vs_1dpa	DAR
chr11-361335-363011	2.78842e-55	-2.39951	0.037	0.194	5.73667e-50	pdrg1	1017	Superficial_Epithelial_0dpa_vs_1dpa	DAR
chr24-4257759-4258567	3.19353e-55	-1.99654	0.049	0.214	6.5701e-50	BX004842.1	59611	Superficial_Epithelial_0dpa_vs_1dpa	DAR
chr3-35850735-35851571	3.844e-55	-3.97485	0.006	0.108	7.90835e-50	suz12a	0	Superficial_Epithelial_0dpa_vs_1dpa	DAR
chr10-28234591-28235730	5.01384e-55	-3.05959	0.015	0.13	1.03151e-49	CU207388.1	16947	Superficial_Epithelial_0dpa_vs_1dpa	DAR
chr10-17199227-17200061	6.38753e-55	-2.93841	0.015	0.122	1.31412e-49	depdc5	0	Superficial_Epithelial_0dpa_vs_1dpa	DAR
chr12-9093359-9094465	9.57013e-55	-2.4447	0.035	0.189	1.96888e-49	adam8b	2497	Superficial_Epithelial_0dpa_vs_1dpa	DAR
chr21-19547570-19549996	1.78021e-54	-1.6786	0.086	0.294	3.66245e-49	rai14	0	Superficial_Epithelial_0dpa_vs_1dpa	DAR
chr20-24056273-24057578	2.1883e-54	-1.97744	0.053	0.221	4.50203e-49	bach2b	0	Superficial_Epithelial_0dpa_vs_1dpa	DAR
chr20-23808044-23809321	3.01323e-54	-2.55216	0.029	0.166	6.19917e-49	sh3rf1	0	Superficial_Epithelial_0dpa_vs_1dpa	DAR
chr3-52073621-52074997	6.02746e-54	-3.18514	0.015	0.129	1.24004e-48	BX908776.1	0	Superficial_Epithelial_0dpa_vs_1dpa	DAR
chr5-43744532-43745110	7.1304e-54	-3.51964	0.009	0.111	1.46695e-48	BX950211.1	16262	Superficial_Epithelial_0dpa_vs_1dpa	DAR
chr7-33634090-33635741	7.40745e-54	-2.92551	0.018	0.137	1.52395e-48	tle3b	8692	Superficial_Epithelial_0dpa_vs_1dpa	DAR
chr22-36034674-36035267	1.03729e-53	-3.56191	0.009	0.106	2.13404e-48	LO016987.2	73308	Superficial_Epithelial_0dpa_vs_1dpa	DAR
chr2-57358992-57360722	1.43321e-53	-1.18695	0.178	0.43	2.94856e-48	tcf3a	0	Superficial_Epithelial_0dpa_vs_1dpa	DAR
chr2-3192488-3193571	1.45892e-53	-1.88395	0.062	0.247	3.00146e-48	wnt9a	7773	Superficial_Epithelial_0dpa_vs_1dpa	DAR
chr14-24184594-24186725	1.57584e-53	-1.75904	0.079	0.274	3.24201e-48	stc2a	28320	Superficial_Epithelial_0dpa_vs_1dpa	DAR
chr16-25578235-25579619	2.42159e-53	-2.33855	0.035	0.186	4.98198e-48	atxn1b	9722	Superficial_Epithelial_0dpa_vs_1dpa	DAR
chr5-50780608-50783159	2.67496e-53	-1.8755	0.059	0.228	5.50324e-48	zgc:194908	0	Superficial_Epithelial_0dpa_vs_1dpa	DAR
chr24-14365738-14366893	3.54685e-53	-2.15853	0.04	0.194	7.29701e-48	ncoa2	0	Superficial_Epithelial_0dpa_vs_1dpa	DAR
chr12-36921766-36922898	4.0385e-53	-2.48108	0.026	0.157	8.30848e-48	cox10	0	Superficial_Epithelial_0dpa_vs_1dpa	DAR
chr9-5256803-5258219	5.5161e-53	-3.01618	0.015	0.123	1.13484e-47	cytip	0	Superficial_Epithelial_0dpa_vs_1dpa	DAR
chr25-12623836-12624751	5.97338e-53	-2.98184	0.017	0.132	1.22891e-47	zcchc14	0	Superficial_Epithelial_0dpa_vs_1dpa	DAR
chr11-35921321-35922261	6.51892e-53	-3.81797	0.007	0.103	1.34115e-47	itpr1b	0	Superficial_Epithelial_0dpa_vs_1dpa	DAR
chr25-36008016-36008513	6.52899e-53	-3.5249	0.01	0.112	1.34322e-47	rbl2	2301	Superficial_Epithelial_0dpa_vs_1dpa	DAR
chr8-43769848-43770430	6.55558e-53	-3.10241	0.013	0.122	1.34869e-47	ulk1a	0	Superficial_Epithelial_0dpa_vs_1dpa	DAR
chr2-37369851-37371210	6.62825e-53	-2.17153	0.041	0.196	1.36364e-47	prkci	0	Superficial_Epithelial_0dpa_vs_1dpa	DAR
chr3-23505265-23507021	1.37033e-52	-1.65041	0.076	0.262	2.81921e-47	si:dkey-225f5.4	0	Superficial_Epithelial_0dpa_vs_1dpa	DAR
chr15-16979931-16980636	1.37854e-52	-2.59841	0.026	0.153	2.83609e-47	hip1	0	Superficial_Epithelial_0dpa_vs_1dpa	DAR
chr15-3416519-3417585	1.47931e-52	-3.3238	0.012	0.121	3.04341e-47	cog6	36943	Superficial_Epithelial_0dpa_vs_1dpa	DAR
chr8-50693426-50694457	1.60162e-52	-1.99684	0.047	0.205	3.29505e-47	PEBP4	0	Superficial_Epithelial_0dpa_vs_1dpa	DAR
chr5-30486728-30487700	1.80519e-52	-4.12918	0.006	0.106	3.71385e-47	phldb1a	0	Superficial_Epithelial_0dpa_vs_1dpa	DAR
chr16-7482297-7483301	1.82583e-52	-2.82072	0.017	0.142	3.75631e-47	prdm1a	38908	Superficial_Epithelial_0dpa_vs_1dpa	DAR
chr7-25032870-25034139	1.9283e-52	-2.17855	0.046	0.205	3.96713e-47	sb:cb1058	0	Superficial_Epithelial_0dpa_vs_1dpa	DAR
chr18-23376747-23377587	2.03369e-52	-2.14623	0.036	0.177	4.18395e-47	mctp2a	0	Superficial_Epithelial_0dpa_vs_1dpa	DAR
chr1-1401942-1402957	2.50165e-52	-2.54339	0.028	0.168	5.14669e-47	runx1	0	Superficial_Epithelial_0dpa_vs_1dpa	DAR
chr14-31810269-31811506	3.04008e-52	-1.75656	0.067	0.248	6.25442e-47	arhgef6	0	Superficial_Epithelial_0dpa_vs_1dpa	DAR
chr10-33070260-33071021	3.34236e-52	-2.01922	0.049	0.215	6.8763e-47	cux1a	0	Superficial_Epithelial_0dpa_vs_1dpa	DAR
chr21-11746994-11747641	3.60372e-52	-2.40295	0.027	0.161	7.414e-47	ell2	1455	Superficial_Epithelial_0dpa_vs_1dpa	DAR
chr7-72282917-72283735	4.97798e-52	-2.90554	0.015	0.128	1.02413e-46	tollip	0	Superficial_Epithelial_0dpa_vs_1dpa	DAR
chr20-28706041-28706629	5.02841e-52	-3.18682	0.013	0.124	1.0345e-46	sipa1l1	0	Superficial_Epithelial_0dpa_vs_1dpa	DAR
chr3-26826584-26827878	5.80668e-52	-2.23767	0.034	0.179	1.19462e-46	clec16a	0	Superficial_Epithelial_0dpa_vs_1dpa	DAR
chr17-37638740-37639539	5.85797e-52	1.49054	0.181	0.074	1.20517e-46	tmem229b	0	Superficial_Epithelial_0dpa_vs_1dpa	DAR
chr5-15067617-15068370	6.03923e-52	-3.82639	0.007	0.101	1.24246e-46	CR936518.2	0	Superficial_Epithelial_0dpa_vs_1dpa	DAR
chr12-7346260-7347135	6.08168e-52	2.52935	0.107	0.024	1.2512e-46	bicc1b	52267	Superficial_Epithelial_0dpa_vs_1dpa	DAR
chr20-37719020-37720150	1.03661e-51	-1.58919	0.094	0.294	2.13263e-46	aig1	0	Superficial_Epithelial_0dpa_vs_1dpa	DAR
chr24-29921463-29923033	1.41601e-51	-1.66988	0.076	0.271	2.91319e-46	frrs1b	0	Superficial_Epithelial_0dpa_vs_1dpa	DAR
chr14-2534218-2535457	1.41812e-51	-3.88763	0.007	0.102	2.91752e-46	fgf18a	0	Superficial_Epithelial_0dpa_vs_1dpa	DAR
chr19-383878-384626	1.71385e-51	-2.46625	0.029	0.17	3.52594e-46	tnfaip8l2a	4127	Superficial_Epithelial_0dpa_vs_1dpa	DAR
chr17-37717464-37719141	1.80264e-51	-3.48402	0.01	0.108	3.7086e-46	tmem229b	67635	Superficial_Epithelial_0dpa_vs_1dpa	DAR
chr20-28700169-28701437	1.88415e-51	-1.40222	0.12	0.333	3.8763e-46	sipa1l1	0	Superficial_Epithelial_0dpa_vs_1dpa	DAR
chr4-18081610-18082534	2.09059e-51	-2.15895	0.043	0.19	4.301e-46	anks1b	0	Superficial_Epithelial_0dpa_vs_1dpa	DAR
chr10-1763579-1765112	2.39386e-51	-1.8006	0.069	0.241	4.92495e-46	epb41l4a	0	Superficial_Epithelial_0dpa_vs_1dpa	DAR
chr2-20899609-20900180	2.88355e-51	-3.10987	0.014	0.118	5.93238e-46	pdca	9179	Superficial_Epithelial_0dpa_vs_1dpa	DAR
chr4-11911261-11912556	6.60347e-51	-2.89084	0.018	0.135	1.35854e-45	btbd11a	0	Superficial_Epithelial_0dpa_vs_1dpa	DAR
chr7-63390094-63390866	8.14482e-51	-2.47609	0.029	0.159	1.67565e-45	pcdh7b	0	Superficial_Epithelial_0dpa_vs_1dpa	DAR
chr10-1228075-1229160	9.76571e-51	-2.32706	0.035	0.181	2.00912e-45	pdlim5b	0	Superficial_Epithelial_0dpa_vs_1dpa	DAR
chr15-62201-64458	1.14089e-50	-0.964764	0.241	0.496	2.34717e-45	AXL	0	Superficial_Epithelial_0dpa_vs_1dpa	DAR
chr5-31589781-31590593	1.24142e-50	-2.85858	0.017	0.129	2.554e-45	si:dkey-220k22.1	0	Superficial_Epithelial_0dpa_vs_1dpa	DAR
chr10-28645081-28646170	1.42794e-50	-3.68974	0.007	0.101	2.93773e-45	cblb	0	Superficial_Epithelial_0dpa_vs_1dpa	DAR
chr8-16992136-16993202	2.3816e-50	-1.48175	0.097	0.298	4.89971e-45	pde4d	0	Superficial_Epithelial_0dpa_vs_1dpa	DAR
chr3-48803922-48804549	2.44076e-50	-2.46993	0.026	0.153	5.02142e-45	hs3st3b1a	38368	Superficial_Epithelial_0dpa_vs_1dpa	DAR
chr20-35802637-35804079	2.59921e-50	-3.03541	0.015	0.128	5.34741e-45	tnfrsf21	0	Superficial_Epithelial_0dpa_vs_1dpa	DAR
chr14-24438247-24439235	3.64582e-50	-2.50603	0.028	0.155	7.50063e-45	cxcl14	27573	Superficial_Epithelial_0dpa_vs_1dpa	DAR
chr4-9072361-9073347	4.13317e-50	-3.13656	0.012	0.116	8.50325e-45	slc41a2b	0	Superficial_Epithelial_0dpa_vs_1dpa	DAR
chr18-6763398-6764144	4.66628e-50	-1.75941	0.062	0.231	9.60003e-45	adm2b	0	Superficial_Epithelial_0dpa_vs_1dpa	DAR
chr17-25316569-25317399	7.69896e-50	-3.08038	0.012	0.119	1.58392e-44	pabpc4	0	Superficial_Epithelial_0dpa_vs_1dpa	DAR
chr7-67180263-67181128	1.01678e-49	-2.49017	0.025	0.149	2.09185e-44	swap70a	2589	Superficial_Epithelial_0dpa_vs_1dpa	DAR
chr8-16393169-16394802	1.97189e-49	-2.47886	0.024	0.148	4.05681e-44	faf1	0	Superficial_Epithelial_0dpa_vs_1dpa	DAR
chr15-3600921-3602096	2.45873e-49	-3.38462	0.011	0.118	5.05839e-44		0	Superficial_Epithelial_0dpa_vs_1dpa	DAR
chr22-15144534-15145311	2.48743e-49	-3.19176	0.01	0.101	5.11745e-44	mfng	106215	Superficial_Epithelial_0dpa_vs_1dpa	DAR
chr11-13125987-13127488	3.91445e-49	-1.58497	0.095	0.295	8.05328e-44	elovl1b	0	Superficial_Epithelial_0dpa_vs_1dpa	DAR
chr6-43210042-43211298	5.0706e-49	-3.3627	0.011	0.106	1.04319e-43	si:dkey-178o16.4	7552	Superficial_Epithelial_0dpa_vs_1dpa	DAR
chr5-22077806-22078828	6.10651e-49	-3.09963	0.015	0.125	1.25631e-43	zc4h2	0	Superficial_Epithelial_0dpa_vs_1dpa	DAR
chr2-37371583-37372271	7.20592e-49	-1.89794	0.052	0.21	1.48249e-43	prkci	0	Superficial_Epithelial_0dpa_vs_1dpa	DAR
chr9-42455785-42456736	7.75692e-49	-1.96495	0.049	0.2	1.59585e-43	tfpia	0	Superficial_Epithelial_0dpa_vs_1dpa	DAR
chr3-57683589-57684708	8.24657e-49	-3.06387	0.012	0.121	1.69658e-43	lgals3bpa	14537	Superficial_Epithelial_0dpa_vs_1dpa	DAR
chr23-3191156-3192868	1.0257e-48	2.20933	0.108	0.029	2.11019e-43	AL954726.1	135059	Superficial_Epithelial_0dpa_vs_1dpa	DAR
chr7-69785667-69785998	1.18938e-48	-3.05673	0.013	0.107	2.44694e-43	USP53	0	Superficial_Epithelial_0dpa_vs_1dpa	DAR
chr17-37863814-37864994	1.33633e-48	-2.83173	0.017	0.134	2.74926e-43	BX248106.1	35426	Superficial_Epithelial_0dpa_vs_1dpa	DAR
chr20-11226444-11227817	1.70189e-48	1.28598	0.207	0.103	3.50133e-43	flrt2	48421	Superficial_Epithelial_0dpa_vs_1dpa	DAR
chr16-30661957-30663345	1.70511e-48	-2.53253	0.025	0.145	3.50795e-43	ldlrad4b	5976	Superficial_Epithelial_0dpa_vs_1dpa	DAR
chr13-46146027-46147342	1.8939e-48	-3.32414	0.011	0.106	3.89636e-43	marcksl1a	30135	Superficial_Epithelial_0dpa_vs_1dpa	DAR
chr6-18219597-18221152	3.39455e-48	-2.07998	0.04	0.185	6.98367e-43	p4hb	0	Superficial_Epithelial_0dpa_vs_1dpa	DAR
chr17-28674427-28675308	3.9649e-48	-1.60836	0.081	0.259	8.15706e-43	hectd1	0	Superficial_Epithelial_0dpa_vs_1dpa	DAR
chr2-32632443-32633501	4.13704e-48	1.59985	0.155	0.057	8.51121e-43	si:dkeyp-73d8.8	3006	Superficial_Epithelial_0dpa_vs_1dpa	DAR
chr3-33728419-33729851	4.95298e-48	-2.43917	0.024	0.141	1.01899e-42	nacc1a	15162	Superficial_Epithelial_0dpa_vs_1dpa	DAR
chr3-39670049-39671113	1.93656e-47	-2.3942	0.028	0.151	3.98412e-42	epn2	0	Superficial_Epithelial_0dpa_vs_1dpa	DAR
chr4-12805326-12805817	1.95792e-47	-2.82524	0.015	0.119	4.02806e-42	b2m	9836	Superficial_Epithelial_0dpa_vs_1dpa	DAR
chr14-28328772-28329397	2.59193e-47	-2.59644	0.02	0.133	5.33243e-42	mid2	0	Superficial_Epithelial_0dpa_vs_1dpa	DAR
chr23-26395311-26396131	2.93705e-47	-3.19826	0.011	0.105	6.04246e-42	MAGI3	0	Superficial_Epithelial_0dpa_vs_1dpa	DAR
chr20-22629448-22630449	3.29094e-47	-2.92635	0.015	0.122	6.77052e-42	lnx1	36098	Superficial_Epithelial_0dpa_vs_1dpa	DAR
chr23-5642407-5643355	3.32119e-47	1.08846	0.231	0.133	6.83274e-42	pkp1a	2731	Superficial_Epithelial_0dpa_vs_1dpa	DAR
chr6-59957440-59959305	3.48387e-47	-1.68306	0.073	0.253	7.16744e-42	nufip1	5816	Superficial_Epithelial_0dpa_vs_1dpa	DAR
chr3-32823032-32824183	3.5928e-47	-1.84895	0.052	0.205	7.39154e-42	zgc:153733	0	Superficial_Epithelial_0dpa_vs_1dpa	DAR
chr20-24046562-24047504	3.87442e-47	-2.68936	0.018	0.128	7.97093e-42	bach2b	0	Superficial_Epithelial_0dpa_vs_1dpa	DAR
chr20-24882440-24883274	4.96358e-47	-2.03487	0.046	0.201	1.02117e-41	epha7	0	Superficial_Epithelial_0dpa_vs_1dpa	DAR
chr13-17883352-17884688	5.02295e-47	-3.07125	0.012	0.104	1.03338e-41	march8	0	Superficial_Epithelial_0dpa_vs_1dpa	DAR
chr17-41015597-41016597	5.93453e-47	-1.9427	0.045	0.202	1.22092e-41	rbks	0	Superficial_Epithelial_0dpa_vs_1dpa	DAR
chr9-51721670-51724102	9.90075e-47	-2.0952	0.04	0.177	2.0369e-41	rbms1b	0	Superficial_Epithelial_0dpa_vs_1dpa	DAR
chr13-17802565-17803765	1.25074e-46	-2.78368	0.021	0.136	2.57316e-41	BX470214.1	0	Superficial_Epithelial_0dpa_vs_1dpa	DAR
chr15-9255650-9257513	1.29075e-46	-2.71	0.022	0.144	2.65549e-41	calm3a	0	Superficial_Epithelial_0dpa_vs_1dpa	DAR
chr8-42677317-42678741	1.58778e-46	-1.48714	0.089	0.276	3.26658e-41	si:ch73-138n13.1	0	Superficial_Epithelial_0dpa_vs_1dpa	DAR
chr7-15852888-15853957	1.71573e-46	-3.15872	0.011	0.108	3.5298e-41	pax6b	17198	Superficial_Epithelial_0dpa_vs_1dpa	DAR
chr1-1458367-1459573	3.17958e-46	-3.67834	0.008	0.106	6.54142e-41	runx1	56063	Superficial_Epithelial_0dpa_vs_1dpa	DAR
chr23-22575498-22576480	3.21615e-46	-1.87147	0.053	0.211	6.61664e-41	CR388207.1	0	Superficial_Epithelial_0dpa_vs_1dpa	DAR
chr11-39490533-39491580	3.93203e-46	-3.15956	0.011	0.102	8.08945e-41	CR847998.1	146159	Superficial_Epithelial_0dpa_vs_1dpa	DAR
chr2-58829425-58831450	5.53824e-46	1.66376	0.151	0.059	1.13939e-40	cirbpa	9730	Superficial_Epithelial_0dpa_vs_1dpa	DAR
chr6-27627573-27628488	5.82647e-46	-2.2037	0.037	0.17	1.19869e-40	slco2a1	0	Superficial_Epithelial_0dpa_vs_1dpa	DAR
chr3-37021360-37022956	6.24285e-46	-1.48117	0.086	0.256	1.28435e-40	PLEKHH3	0	Superficial_Epithelial_0dpa_vs_1dpa	DAR
chr5-50936788-50937544	6.56911e-46	-1.99519	0.044	0.183	1.35148e-40	cert1a	0	Superficial_Epithelial_0dpa_vs_1dpa	DAR
chr12-22282899-22283975	7.23084e-46	-2.9654	0.017	0.123	1.48761e-40	wnt3	0	Superficial_Epithelial_0dpa_vs_1dpa	DAR
chr3-57697153-57698188	7.5089e-46	-3.34128	0.01	0.109	1.54482e-40	lgals3bpa	1057	Superficial_Epithelial_0dpa_vs_1dpa	DAR
chr14-7115974-7117135	8.22029e-46	-1.638	0.083	0.268	1.69118e-40	si:ch73-43g23.1	3484	Superficial_Epithelial_0dpa_vs_1dpa	DAR
chr24-31361093-31362724	1.57722e-45	-1.86173	0.049	0.201	3.24484e-40	cremb	0	Superficial_Epithelial_0dpa_vs_1dpa	DAR
chr16-35709137-35710631	1.61515e-45	-2.96346	0.013	0.114	3.32289e-40	map7d1a	0	Superficial_Epithelial_0dpa_vs_1dpa	DAR
chr21-3083703-3084554	1.75231e-45	-3.55232	0.009	0.103	3.60506e-40	SHC3	8864	Superficial_Epithelial_0dpa_vs_1dpa	DAR
chr6-35196609-35197605	1.81252e-45	-2.775	0.015	0.112	3.72893e-40	nos1apa	0	Superficial_Epithelial_0dpa_vs_1dpa	DAR
chr8-2495700-2496686	2.47012e-45	-2.73211	0.017	0.118	5.08182e-40	rpl6	0	Superficial_Epithelial_0dpa_vs_1dpa	DAR
chr7-28547058-28549784	4.81311e-45	-1.89744	0.058	0.219	9.9021e-40	dennd2b	0	Superficial_Epithelial_0dpa_vs_1dpa	DAR
chr16-33662367-33663543	4.96778e-45	-2.09052	0.041	0.187	1.02203e-39	fhl3a	0	Superficial_Epithelial_0dpa_vs_1dpa	DAR
chr8-29755416-29756074	5.29667e-45	-2.35031	0.027	0.156	1.08969e-39	mapk4	0	Superficial_Epithelial_0dpa_vs_1dpa	DAR
chr13-6223444-6224256	5.48136e-45	-2.82372	0.016	0.119	1.12769e-39	apmap	0	Superficial_Epithelial_0dpa_vs_1dpa	DAR
chr3-56523518-56524505	5.73679e-45	-2.69565	0.021	0.131	1.18024e-39	cyth1a	0	Superficial_Epithelial_0dpa_vs_1dpa	DAR
chr17-10595823-10596733	7.83041e-45	-2.33133	0.027	0.151	1.61097e-39	mapkbp1	0	Superficial_Epithelial_0dpa_vs_1dpa	DAR
chr9-42466683-42468709	8.40893e-45	-2.38238	0.031	0.159	1.72999e-39	tfpia	0	Superficial_Epithelial_0dpa_vs_1dpa	DAR
chr17-4154067-4155295	9.18747e-45	-2.13688	0.041	0.178	1.89016e-39	CU929304.1	51982	Superficial_Epithelial_0dpa_vs_1dpa	DAR
chr2-47670651-47671886	9.65995e-45	-2.60635	0.022	0.133	1.98736e-39	cul3a	0	Superficial_Epithelial_0dpa_vs_1dpa	DAR
chr10-41574732-41575684	2.70251e-44	-2.73136	0.016	0.108	5.55992e-39	CABZ01049847.1	0	Superficial_Epithelial_0dpa_vs_1dpa	DAR
chr13-35452748-35453507	3.15302e-44	-2.65766	0.019	0.126	6.48676e-39	slx4ip	0	Superficial_Epithelial_0dpa_vs_1dpa	DAR
chr21-3760317-3761652	3.4047e-44	-2.85275	0.015	0.123	7.00456e-39	scamp1	0	Superficial_Epithelial_0dpa_vs_1dpa	DAR
chr16-22613759-22614659	3.90546e-44	-2.99238	0.013	0.11	8.03479e-39	chrnb2	3960	Superficial_Epithelial_0dpa_vs_1dpa	DAR
chr16-29503841-29504527	4.68855e-44	-2.7281	0.016	0.123	9.64584e-39	ctsk	1053	Superficial_Epithelial_0dpa_vs_1dpa	DAR
chr16-30724598-30725915	5.18342e-44	-1.97105	0.047	0.187	1.0664e-38	ptk2ab	9510	Superficial_Epithelial_0dpa_vs_1dpa	DAR
chr11-21349774-21350645	5.91365e-44	-3.29514	0.011	0.106	1.21663e-38	RASSF5	0	Superficial_Epithelial_0dpa_vs_1dpa	DAR
chr7-21740683-21742234	7.67281e-44	-1.65539	0.074	0.24	1.57854e-38	kdm6ba	0	Superficial_Epithelial_0dpa_vs_1dpa	DAR
chr17-25336432-25338006	8.37934e-44	-1.56638	0.081	0.249	1.7239e-38	tmem54a	0	Superficial_Epithelial_0dpa_vs_1dpa	DAR
chr9-18655513-18655955	1.19181e-43	-2.11778	0.032	0.161	2.45194e-38	BX957328.1	47243	Superficial_Epithelial_0dpa_vs_1dpa	DAR
chr8-20542224-20543115	1.36655e-43	-2.0382	0.037	0.17	2.81142e-38	csnk1g2b	0	Superficial_Epithelial_0dpa_vs_1dpa	DAR
chr11-41462984-41464203	2.64338e-43	-2.22016	0.031	0.156	5.43828e-38	park7	0	Superficial_Epithelial_0dpa_vs_1dpa	DAR
chr13-36403509-36404912	2.7679e-43	-1.72251	0.061	0.215	5.69445e-38	dcaf5	1361	Superficial_Epithelial_0dpa_vs_1dpa	DAR
chr7-65959347-65960194	3.15579e-43	-3.01007	0.013	0.106	6.49248e-38	CT573494.1	5105	Superficial_Epithelial_0dpa_vs_1dpa	DAR
chr1-5547875-5549253	3.53597e-43	-2.59447	0.024	0.142	7.27462e-38	fn1b	4809	Superficial_Epithelial_0dpa_vs_1dpa	DAR
chr15-34693177-34694207	3.85974e-43	-1.56061	0.078	0.249	7.94072e-38	tnfb	5377	Superficial_Epithelial_0dpa_vs_1dpa	DAR
chr2-3727387-3728348	3.92308e-43	-1.54144	0.076	0.244	8.07104e-38	egfra	0	Superficial_Epithelial_0dpa_vs_1dpa	DAR
chr4-19263327-19264275	4.5395e-43	1.53689	0.154	0.062	9.3392e-38	si:dkey-21o22.2	132209	Superficial_Epithelial_0dpa_vs_1dpa	DAR
chr20-16543434-16544334	4.76447e-43	-2.19885	0.034	0.166	9.80205e-38	ches1	0	Superficial_Epithelial_0dpa_vs_1dpa	DAR
chr24-3316896-3317647	6.637e-43	1.80321	0.118	0.039	1.36544e-37	gyg1b	0	Superficial_Epithelial_0dpa_vs_1dpa	DAR
chr21-45282973-45283923	7.00372e-43	-2.14294	0.034	0.16	1.44089e-37	tcf7	0	Superficial_Epithelial_0dpa_vs_1dpa	DAR
chr5-40242404-40243142	7.15729e-43	-2.98385	0.014	0.111	1.47248e-37	si:dkey-193c22.2	0	Superficial_Epithelial_0dpa_vs_1dpa	DAR
chr18-18433455-18434359	7.95374e-43	-2.41723	0.026	0.142	1.63634e-37	siah1	4972	Superficial_Epithelial_0dpa_vs_1dpa	DAR
chr2-17683639-17684751	8.3025e-43	-1.94645	0.046	0.185	1.70809e-37	ptprfb	0	Superficial_Epithelial_0dpa_vs_1dpa	DAR
chr7-24362450-24363679	8.59821e-43	-1.81444	0.059	0.214	1.76893e-37	txn	0	Superficial_Epithelial_0dpa_vs_1dpa	DAR
chr18-23023942-23025240	1.37265e-42	-2.81743	0.016	0.121	2.82398e-37	cbfb	0	Superficial_Epithelial_0dpa_vs_1dpa	DAR
chr3-47433659-47434395	2.31778e-42	-1.93996	0.047	0.195	4.76842e-37	AL928740.1	26092	Superficial_Epithelial_0dpa_vs_1dpa	DAR
chr16-51336893-51337918	2.65882e-42	-2.15104	0.041	0.183	5.47004e-37	C16H1orf232	5372	Superficial_Epithelial_0dpa_vs_1dpa	DAR
chr10-36334983-36335922	2.94242e-42	-3.01821	0.011	0.101	6.05351e-37	BX088524.2	0	Superficial_Epithelial_0dpa_vs_1dpa	DAR
chr2-2044027-2045845	3.21022e-42	-2.40296	0.028	0.139	6.60444e-37	slc22a23	0	Superficial_Epithelial_0dpa_vs_1dpa	DAR
chr23-24645849-24646358	3.61218e-42	-1.702	0.057	0.2	7.43142e-37	nckap5l	0	Superficial_Epithelial_0dpa_vs_1dpa	DAR
chr4-16220175-16221155	4.23425e-42	-2.24661	0.031	0.157	8.7112e-37	BX649423.3	6634	Superficial_Epithelial_0dpa_vs_1dpa	DAR
chr8-7648918-7649727	5.22801e-42	-2.7851	0.014	0.105	1.07557e-36	CR385024.1	0	Superficial_Epithelial_0dpa_vs_1dpa	DAR
chr8-43331882-43332941	6.0551e-42	-3.14542	0.012	0.108	1.24573e-36	rflna	8053	Superficial_Epithelial_0dpa_vs_1dpa	DAR
chr24-38740515-38741442	6.49016e-42	1.13942	0.197	0.107	1.33523e-36	ntn2	0	Superficial_Epithelial_0dpa_vs_1dpa	DAR
chr6-52960301-52961250	7.45726e-42	-2.35578	0.024	0.137	1.5342e-36	uba7	0	Superficial_Epithelial_0dpa_vs_1dpa	DAR
chr23-30012438-30013433	7.52809e-42	-2.03662	0.043	0.183	1.54877e-36	ccdc187	0	Superficial_Epithelial_0dpa_vs_1dpa	DAR
chr13-47368961-47369793	8.66008e-42	-1.59457	0.066	0.226	1.78166e-36	bcl2l11	0	Superficial_Epithelial_0dpa_vs_1dpa	DAR
chr3-54820481-54822028	8.80969e-42	-2.87914	0.019	0.125	1.81243e-36	sc:d0202	5950	Superficial_Epithelial_0dpa_vs_1dpa	DAR
chr20-23768231-23769898	1.02851e-41	-1.82116	0.052	0.2	2.11596e-36	sh3rf1	0	Superficial_Epithelial_0dpa_vs_1dpa	DAR
chr21-22816947-22818950	1.15454e-41	-2.57327	0.018	0.112	2.37527e-36	angptl5	2019	Superficial_Epithelial_0dpa_vs_1dpa	DAR
chr15-23698574-23700156	1.45123e-41	-2.24171	0.031	0.151	2.98564e-36	zgc:154093	0	Superficial_Epithelial_0dpa_vs_1dpa	DAR
chr9-18601167-18602534	1.80959e-41	-1.85867	0.049	0.186	3.7229e-36	BX957328.1	2925	Superficial_Epithelial_0dpa_vs_1dpa	DAR
chr5-32026431-32027648	2.6736e-41	-1.93647	0.042	0.177	5.50046e-36	scai	0	Superficial_Epithelial_0dpa_vs_1dpa	DAR
chr21-20125351-20126043	3.18633e-41	-2.86015	0.016	0.117	6.5553e-36	dusp4	4807	Superficial_Epithelial_0dpa_vs_1dpa	DAR
chr5-59303387-59304504	3.60649e-41	-1.60058	0.068	0.222	7.41971e-36	rasa4	0	Superficial_Epithelial_0dpa_vs_1dpa	DAR
chr3-56704670-56705404	3.97859e-41	-2.59283	0.017	0.114	8.18524e-36	rnf213a	0	Superficial_Epithelial_0dpa_vs_1dpa	DAR
chr5-51855336-51857064	4.30523e-41	-2.3836	0.027	0.147	8.85724e-36	cmya5	0	Superficial_Epithelial_0dpa_vs_1dpa	DAR
chr13-36742246-36744083	4.35859e-41	-1.15796	0.153	0.367	8.96701e-36	map4k5	0	Superficial_Epithelial_0dpa_vs_1dpa	DAR
chr20-25473459-25474617	9.1024e-41	1.73479	0.118	0.041	1.87266e-35	si:dkey-183n20.15	0	Superficial_Epithelial_0dpa_vs_1dpa	DAR
chr15-22360351-22361975	1.1117e-40	-3.04094	0.012	0.107	2.28713e-35	pde9al	11724	Superficial_Epithelial_0dpa_vs_1dpa	DAR
chr7-37309980-37311238	1.63207e-40	-1.09578	0.165	0.386	3.35768e-35	sall1a	47765	Superficial_Epithelial_0dpa_vs_1dpa	DAR
chr2-42781994-42783347	1.88934e-40	1.37303	0.156	0.068	3.88698e-35	adcy8	0	Superficial_Epithelial_0dpa_vs_1dpa	DAR
chr11-42432351-42433180	2.02009e-40	-2.95716	0.012	0.101	4.15597e-35	dennd6aa	0	Superficial_Epithelial_0dpa_vs_1dpa	DAR
chr17-9919050-9919861	2.81671e-40	-2.13179	0.034	0.157	5.79487e-35	egln3	0	Superficial_Epithelial_0dpa_vs_1dpa	DAR
chr23-25669716-25671201	2.88615e-40	-2.66764	0.022	0.126	5.93773e-35	lrp1ab	0	Superficial_Epithelial_0dpa_vs_1dpa	DAR
chr13-14927008-14927626	3.05978e-40	-1.97544	0.042	0.176	6.29494e-35	cdc25b	0	Superficial_Epithelial_0dpa_vs_1dpa	DAR
chr1-51791749-51792735	3.40825e-40	-2.13869	0.037	0.163	7.01185e-35	BX548032.3	0	Superficial_Epithelial_0dpa_vs_1dpa	DAR
chr5-27926951-27927928	4.10234e-40	-2.32793	0.031	0.15	8.43982e-35	ppp3cca	0	Superficial_Epithelial_0dpa_vs_1dpa	DAR
chr23-687707-689491	4.8871e-40	-1.56749	0.074	0.232	1.00543e-34	BX323461.1	11442	Superficial_Epithelial_0dpa_vs_1dpa	DAR
chr14-36889506-36890618	5.35038e-40	-1.6921	0.061	0.209	1.10074e-34	LECT2	0	Superficial_Epithelial_0dpa_vs_1dpa	DAR
chr7-60263441-60264911	1.13764e-39	-1.48407	0.085	0.257	2.34048e-34	plcb3	0	Superficial_Epithelial_0dpa_vs_1dpa	DAR
chr2-30069471-30070138	1.18323e-39	-2.66853	0.016	0.105	2.43428e-34	shhb	14038	Superficial_Epithelial_0dpa_vs_1dpa	DAR
chr7-28681864-28682628	1.26627e-39	-2.95021	0.013	0.107	2.60513e-34	adgrg1	0	Superficial_Epithelial_0dpa_vs_1dpa	DAR
chr13-5693269-5694442	1.38949e-39	-2.1224	0.037	0.165	2.85863e-34	CR926469.1	99263	Superficial_Epithelial_0dpa_vs_1dpa	DAR
chr3-3649891-3650925	1.57107e-39	-1.67077	0.067	0.228	3.2322e-34	plbd1	0	Superficial_Epithelial_0dpa_vs_1dpa	DAR
chr2-22852841-22853709	1.63992e-39	-1.89619	0.045	0.178	3.37383e-34	amotl2b	0	Superficial_Epithelial_0dpa_vs_1dpa	DAR
chr16-30363-31826	1.85354e-39	-1.03546	0.169	0.397	3.81332e-34	cdkal1	7671	Superficial_Epithelial_0dpa_vs_1dpa	DAR
chr13-11892031-11893611	2.26944e-39	-2.23189	0.029	0.147	4.66896e-34	trim8a	0	Superficial_Epithelial_0dpa_vs_1dpa	DAR
chr19-41970839-41971878	2.3478e-39	-2.85443	0.015	0.108	4.83017e-34	trioa	0	Superficial_Epithelial_0dpa_vs_1dpa	DAR
chr11-14757460-14758490	2.3576e-39	1.70833	0.127	0.042	4.85035e-34	si:ch73-60h1.1	6079	Superficial_Epithelial_0dpa_vs_1dpa	DAR
chr7-52356915-52358221	2.72614e-39	-1.75839	0.05	0.189	5.60855e-34	gnrhr2	6526	Superficial_Epithelial_0dpa_vs_1dpa	DAR
chr9-46014183-46016372	3.07014e-39	-2.2151	0.03	0.153	6.31625e-34	hdac4	0	Superficial_Epithelial_0dpa_vs_1dpa	DAR
chr14-24436459-24437034	3.72386e-39	-2.62245	0.02	0.12	7.66117e-34	cxcl14	25785	Superficial_Epithelial_0dpa_vs_1dpa	DAR
chr23-9213781-9214686	3.78641e-39	1.21114	0.182	0.09	7.78986e-34	si:dkey-66g10.2	2483	Superficial_Epithelial_0dpa_vs_1dpa	DAR
chr2-17837058-17837977	4.87995e-39	-2.47989	0.019	0.117	1.00396e-33	ptprfb	0	Superficial_Epithelial_0dpa_vs_1dpa	DAR
chr15-37343161-37344336	5.34387e-39	-2.40801	0.024	0.134	1.09941e-33		2281	Superficial_Epithelial_0dpa_vs_1dpa	DAR
chr5-43005655-43006776	6.64978e-39	-1.57891	0.08	0.245	1.36807e-33	aqp3a	0	Superficial_Epithelial_0dpa_vs_1dpa	DAR
chr8-2324817-2326146	6.80874e-39	-1.88991	0.043	0.17	1.40078e-33	ikbkb	0	Superficial_Epithelial_0dpa_vs_1dpa	DAR
chr16-45958510-45959507	8.64475e-39	-1.8106	0.049	0.195	1.7785e-33	otud7b	0	Superficial_Epithelial_0dpa_vs_1dpa	DAR
chr5-42998577-43000166	9.25243e-39	-1.96141	0.048	0.183	1.90352e-33	aqp3a	6255	Superficial_Epithelial_0dpa_vs_1dpa	DAR
chr16-52917953-52918799	1.26434e-38	-1.72495	0.057	0.197	2.60116e-33	zdhhc11	1704	Superficial_Epithelial_0dpa_vs_1dpa	DAR
chr20-53250967-53251563	1.28112e-38	1.29019	0.163	0.076	2.63567e-33	FIG4	0	Superficial_Epithelial_0dpa_vs_1dpa	DAR
chr23-31893133-31894557	1.32214e-38	-1.92887	0.046	0.182	2.72006e-33	mtfr2	6792	Superficial_Epithelial_0dpa_vs_1dpa	DAR
chr7-37300547-37301615	1.37125e-38	-2.41402	0.027	0.137	2.82111e-33	sall1a	57388	Superficial_Epithelial_0dpa_vs_1dpa	DAR
chr14-46036147-46037730	1.58237e-38	-1.68762	0.066	0.215	3.25543e-33	nocta	0	Superficial_Epithelial_0dpa_vs_1dpa	DAR
chr25-18245360-18248352	1.63892e-38	-1.38695	0.098	0.269	3.37179e-33	si:dkey-106n21.1	0	Superficial_Epithelial_0dpa_vs_1dpa	DAR
chr12-22306556-22307431	1.8504e-38	-2.53253	0.019	0.118	3.80687e-33	wnt3	1714	Superficial_Epithelial_0dpa_vs_1dpa	DAR
chr13-301019-301612	1.93332e-38	-2.22612	0.028	0.135	3.97745e-33	chs1	0	Superficial_Epithelial_0dpa_vs_1dpa	DAR
chr16-16868858-16869609	2.64451e-38	-1.8226	0.045	0.17	5.44061e-33	myh14	0	Superficial_Epithelial_0dpa_vs_1dpa	DAR
chr21-19875631-19876554	3.72269e-38	-1.56736	0.07	0.23	7.65877e-33	mfhas1	0	Superficial_Epithelial_0dpa_vs_1dpa	DAR
chr5-59251874-59252954	3.77279e-38	-1.85565	0.052	0.188	7.76183e-33	upk3b	0	Superficial_Epithelial_0dpa_vs_1dpa	DAR
chr9-24339527-24341146	4.39276e-38	-2.27358	0.024	0.131	9.03731e-33	tmeff2a	0	Superficial_Epithelial_0dpa_vs_1dpa	DAR
chr9-46075565-46075927	4.95916e-38	1.63884	0.112	0.041	1.02026e-32	hdac4	0	Superficial_Epithelial_0dpa_vs_1dpa	DAR
chr11-42269503-42270162	5.10762e-38	-2.19401	0.028	0.134	1.0508e-32	slmapa	34422	Superficial_Epithelial_0dpa_vs_1dpa	DAR
chr2-35740103-35740732	5.16573e-38	-2.90172	0.013	0.101	1.06276e-32	rasal2	0	Superficial_Epithelial_0dpa_vs_1dpa	DAR
chr16-30646124-30647136	6.76756e-38	-2.31571	0.025	0.131	1.3923e-32	ldlrad4b	0	Superficial_Epithelial_0dpa_vs_1dpa	DAR
chr7-979372-980414	6.90808e-38	-2.50254	0.017	0.106	1.42121e-32	CR926130.1	0	Superficial_Epithelial_0dpa_vs_1dpa	DAR
chr5-57528620-57529738	7.33092e-38	-2.39467	0.023	0.13	1.50821e-32	pisd	0	Superficial_Epithelial_0dpa_vs_1dpa	DAR
chr7-55037462-55038329	7.54212e-38	-1.58172	0.064	0.219	1.55165e-32	tpcn2	0	Superficial_Epithelial_0dpa_vs_1dpa	DAR
chr5-72325694-72326004	9.02422e-38	-2.62818	0.015	0.1	1.85657e-32	tbx3a	1322	Superficial_Epithelial_0dpa_vs_1dpa	DAR
chr2-20937304-20938830	1.14659e-37	-1.75641	0.056	0.205	2.35891e-32	pla2g4aa	0	Superficial_Epithelial_0dpa_vs_1dpa	DAR
chr2-34036034-34036960	1.25297e-37	-2.44369	0.021	0.134	2.57777e-32	eif2b3	0	Superficial_Epithelial_0dpa_vs_1dpa	DAR
chr17-8401424-8402487	1.27114e-37	-1.48375	0.077	0.228	2.61514e-32	cdc42bpaa	0	Superficial_Epithelial_0dpa_vs_1dpa	DAR
chr12-33764533-33765506	1.32131e-37	-1.40029	0.091	0.26	2.71837e-32	llgl2	0	Superficial_Epithelial_0dpa_vs_1dpa	DAR
chr3-12928987-12930447	1.60263e-37	1.21477	0.157	0.08	3.29713e-32	pdgfab	0	Superficial_Epithelial_0dpa_vs_1dpa	DAR
chr7-51240979-51242040	1.71239e-37	-2.66117	0.02	0.12	3.52293e-32	CR354588.1	0	Superficial_Epithelial_0dpa_vs_1dpa	DAR
chr13-33039965-33041492	2.03652e-37	0.993984	0.207	0.114	4.18978e-32	vti1b	0	Superficial_Epithelial_0dpa_vs_1dpa	DAR
chr1-40074185-40076707	2.13986e-37	1.0375	0.196	0.123	4.40238e-32	si:dkey-117m1.4	0	Superficial_Epithelial_0dpa_vs_1dpa	DAR
chr3-52092210-52093593	2.48509e-37	-2.17959	0.032	0.152	5.11262e-32	FUT9	0	Superficial_Epithelial_0dpa_vs_1dpa	DAR
chr22-694563-695523	2.53907e-37	-2.15501	0.029	0.135	5.22369e-32	gpr37l1a	1407	Superficial_Epithelial_0dpa_vs_1dpa	DAR
chr10-19166592-19167206	2.93228e-37	-2.27846	0.023	0.119	6.03263e-32	igsf9a	72783	Superficial_Epithelial_0dpa_vs_1dpa	DAR
chr12-42709554-42710534	3.2968e-37	-1.91383	0.036	0.163	6.78257e-32	LO017793.1	64579	Superficial_Epithelial_0dpa_vs_1dpa	DAR
chr21-25616968-25618894	4.79499e-37	-1.03992	0.172	0.383	9.86483e-32	fosl1b	0	Superficial_Epithelial_0dpa_vs_1dpa	DAR
chr4-20755467-20756338	5.89143e-37	-1.91162	0.045	0.181	1.21206e-31	nav3	56561	Superficial_Epithelial_0dpa_vs_1dpa	DAR
chr18-20960247-20961163	7.8434e-37	1.52044	0.106	0.045	1.61364e-31	igf1ra	0	Superficial_Epithelial_0dpa_vs_1dpa	DAR
chr7-57001108-57002192	8.59429e-37	-1.72762	0.054	0.194	1.76812e-31	myo9aa	0	Superficial_Epithelial_0dpa_vs_1dpa	DAR
chr14-30737702-30740071	9.51367e-37	1.16309	0.172	0.093	1.95727e-31	fosl1a	0	Superficial_Epithelial_0dpa_vs_1dpa	DAR
chr19-48181534-48184024	1.04454e-36	-1.57921	0.069	0.221	2.14895e-31	prdm1b	0	Superficial_Epithelial_0dpa_vs_1dpa	DAR
chr1-32043794-32045454	1.0459e-36	-2.68515	0.015	0.112	2.15175e-31	sts	6126	Superficial_Epithelial_0dpa_vs_1dpa	DAR
chr4-20884859-20886056	1.26758e-36	-2.21749	0.026	0.138	2.60783e-31	nav3	0	Superficial_Epithelial_0dpa_vs_1dpa	DAR
chr21-32497585-32498754	1.32029e-36	-2.72342	0.014	0.1	2.71625e-31	CR735104.1	0	Superficial_Epithelial_0dpa_vs_1dpa	DAR
chr25-14183941-14184617	1.66457e-36	1.34715	0.155	0.07	3.42455e-31	shank2b	0	Superficial_Epithelial_0dpa_vs_1dpa	DAR
chr17-1081195-1081859	1.72764e-36	-1.9385	0.044	0.175	3.55431e-31	dnajc17	0	Superficial_Epithelial_0dpa_vs_1dpa	DAR
chr4-14949416-14949952	1.83988e-36	-2.22786	0.023	0.124	3.78523e-31	slc26a5	0	Superficial_Epithelial_0dpa_vs_1dpa	DAR
chr5-13390385-13391063	2.27798e-36	-1.67578	0.055	0.189	4.68653e-31	ccl19a.1	0	Superficial_Epithelial_0dpa_vs_1dpa	DAR
chr13-5208701-5211067	2.36234e-36	0.591519	0.402	0.326	4.86009e-31	si:dkey-78p8.1	32099	Superficial_Epithelial_0dpa_vs_1dpa	DAR
chr13-18259077-18260036	2.65233e-36	-1.49792	0.076	0.228	5.45669e-31	tet1	0	Superficial_Epithelial_0dpa_vs_1dpa	DAR
chr7-21715394-21716386	3.22034e-36	0.911252	0.218	0.138	6.62527e-31	kdm6ba	0	Superficial_Epithelial_0dpa_vs_1dpa	DAR
chr15-3835179-3836281	3.32659e-36	-1.98502	0.037	0.156	6.84387e-31	CABZ01061591.1	0	Superficial_Epithelial_0dpa_vs_1dpa	DAR
chr17-11404067-11405002	3.94112e-36	-2.61691	0.017	0.112	8.10815e-31	arid4a	0	Superficial_Epithelial_0dpa_vs_1dpa	DAR
chr19-46580607-46581352	5.05274e-36	-1.21041	0.119	0.304	1.03951e-30	ext1b	14176	Superficial_Epithelial_0dpa_vs_1dpa	DAR
chr12-36905726-36906801	5.18908e-36	-2.75255	0.016	0.101	1.06756e-30	cox10	0	Superficial_Epithelial_0dpa_vs_1dpa	DAR
chr13-5505933-5506978	5.35624e-36	-1.33138	0.103	0.274	1.10195e-30	meis1b	0	Superficial_Epithelial_0dpa_vs_1dpa	DAR
chr18-46342114-46342978	5.65237e-36	-2.81875	0.013	0.1	1.16287e-30	foxa3	7595	Superficial_Epithelial_0dpa_vs_1dpa	DAR
chr14-44906015-44906944	5.76043e-36	-2.22585	0.027	0.133	1.18511e-30	atp8a1	0	Superficial_Epithelial_0dpa_vs_1dpa	DAR
chr9-18739889-18740609	9.88072e-36	-2.55319	0.017	0.108	2.03278e-30	tsc22d1	0	Superficial_Epithelial_0dpa_vs_1dpa	DAR
chr13-32306605-32308253	1.01221e-35	-1.42176	0.082	0.229	2.08244e-30	CR769766.1	84129	Superficial_Epithelial_0dpa_vs_1dpa	DAR
chr21-11039876-11040589	1.24032e-35	-2.42828	0.022	0.119	2.55173e-30	nedd4l	0	Superficial_Epithelial_0dpa_vs_1dpa	DAR
chr15-20119757-20120920	1.3571e-35	-1.86956	0.044	0.167	2.79198e-30	med13b	0	Superficial_Epithelial_0dpa_vs_1dpa	DAR
chr11-42302735-42303438	1.37961e-35	-1.8726	0.039	0.165	2.8383e-30	slmapa	1146	Superficial_Epithelial_0dpa_vs_1dpa	DAR
chr24-29586763-29587706	1.58482e-35	1.37816	0.122	0.054	3.26048e-30	vav3a	680	Superficial_Epithelial_0dpa_vs_1dpa	DAR
chr11-11457591-11459748	1.67036e-35	-1.08911	0.148	0.34	3.43646e-30	krt93	0	Superficial_Epithelial_0dpa_vs_1dpa	DAR
chr18-15749496-15751320	2.11426e-35	1.32147	0.132	0.061	4.34971e-30	si:ch211-219a15.4	7054	Superficial_Epithelial_0dpa_vs_1dpa	DAR
chr1-28474513-28476411	2.13305e-35	-1.45918	0.071	0.217	4.38837e-30	si:ch1073-440b2.1	1025	Superficial_Epithelial_0dpa_vs_1dpa	DAR
chr2-20895830-20896696	2.97079e-35	-1.45792	0.081	0.24	6.11186e-30	pdca	5400	Superficial_Epithelial_0dpa_vs_1dpa	DAR
chr15-34660709-34661466	3.24251e-35	-2.3076	0.02	0.11	6.67088e-30	bag6	0	Superficial_Epithelial_0dpa_vs_1dpa	DAR
chr15-20553942-20554814	3.70358e-35	-1.70475	0.051	0.184	7.61944e-30	sgsm2	0	Superficial_Epithelial_0dpa_vs_1dpa	DAR
chr23-19768723-19770714	3.89737e-35	-2.26332	0.028	0.131	8.01813e-30	flna	0	Superficial_Epithelial_0dpa_vs_1dpa	DAR
chr1-46333696-46334532	4.20463e-35	-2.49525	0.019	0.111	8.65028e-30	atp11a	0	Superficial_Epithelial_0dpa_vs_1dpa	DAR
chr20-37868502-37869456	4.79294e-35	-2.31739	0.023	0.124	9.86061e-30	vash2	0	Superficial_Epithelial_0dpa_vs_1dpa	DAR
chr11-35780400-35781191	7.5611e-35	-2.56553	0.017	0.108	1.55556e-29	itpr1b	0	Superficial_Epithelial_0dpa_vs_1dpa	DAR
chr18-8829679-8831276	8.28015e-35	1.03432	0.174	0.098	1.70349e-29	impdh1a	0	Superficial_Epithelial_0dpa_vs_1dpa	DAR
chr23-37640516-37641483	9.10747e-35	-1.9574	0.035	0.149	1.8737e-29	plekhg5b	0	Superficial_Epithelial_0dpa_vs_1dpa	DAR
chr4-17309857-17312092	9.44531e-35	-2.89786	0.014	0.102	1.9432e-29	igf1	0	Superficial_Epithelial_0dpa_vs_1dpa	DAR
chr2-41866679-41869000	1.1158e-34	-2.60974	0.016	0.106	2.29556e-29	keap1a	5638	Superficial_Epithelial_0dpa_vs_1dpa	DAR
chr9-18775-20007	1.16866e-34	-1.87205	0.037	0.151	2.40431e-29	CABZ01078737.1	58	Superficial_Epithelial_0dpa_vs_1dpa	DAR
chr3-31155030-31155420	1.19359e-34	-1.94453	0.035	0.146	2.45559e-29	smg1	0	Superficial_Epithelial_0dpa_vs_1dpa	DAR
chr2-50701566-50702197	1.38157e-34	-2.36946	0.019	0.107	2.84233e-29	CABZ01053221.1	4241	Superficial_Epithelial_0dpa_vs_1dpa	DAR
chr3-18516146-18516832	1.50867e-34	-1.99615	0.032	0.138	3.10381e-29	tbc1d16	14115	Superficial_Epithelial_0dpa_vs_1dpa	DAR
chr23-10322200-10323170	1.63595e-34	-2.49016	0.016	0.102	3.36568e-29	krt18a.1	24680	Superficial_Epithelial_0dpa_vs_1dpa	DAR
chr16-32163529-32164229	1.77154e-34	-1.76772	0.044	0.168	3.64462e-29	CR854927.2	0	Superficial_Epithelial_0dpa_vs_1dpa	DAR
chr7-9903985-9905005	1.82648e-34	1.50839	0.12	0.051	3.75765e-29	cers3a	0	Superficial_Epithelial_0dpa_vs_1dpa	DAR
chr20-19066198-19067510	1.8568e-34	-1.18425	0.126	0.312	3.82003e-29	sox7	0	Superficial_Epithelial_0dpa_vs_1dpa	DAR
chr14-22034557-22035575	2.22241e-34	1.55762	0.106	0.042	4.57222e-29	ssrp1a	0	Superficial_Epithelial_0dpa_vs_1dpa	DAR
chr8-19417527-19419723	3.12858e-34	-1.34189	0.096	0.264	6.43649e-29	zgc:92140	0	Superficial_Epithelial_0dpa_vs_1dpa	DAR
chr15-25484889-25485995	3.47743e-34	-2.64485	0.016	0.108	7.15418e-29	pak4	0	Superficial_Epithelial_0dpa_vs_1dpa	DAR
chr22-34657209-34658026	3.85924e-34	-2.13865	0.027	0.127	7.9397e-29	si:ch73-304f21.1	3374	Superficial_Epithelial_0dpa_vs_1dpa	DAR
chr5-50971542-50972223	3.97737e-34	0.834823	0.26	0.174	8.18273e-29	hmgcra	261	Superficial_Epithelial_0dpa_vs_1dpa	DAR
chr3-23297419-23299462	3.99028e-34	-2.54256	0.015	0.101	8.20928e-29	ppp1r9ba	0	Superficial_Epithelial_0dpa_vs_1dpa	DAR
chr13-47293824-47295548	4.59847e-34	-1.12332	0.142	0.328	9.46051e-29	bcl2l11	65555	Superficial_Epithelial_0dpa_vs_1dpa	DAR
chr10-3351274-3352305	4.70913e-34	-1.4522	0.071	0.214	9.68819e-29	brap	0	Superficial_Epithelial_0dpa_vs_1dpa	DAR
chr12-33645674-33646322	4.81161e-34	-2.21081	0.022	0.111	9.89903e-29	tmem94	0	Superficial_Epithelial_0dpa_vs_1dpa	DAR
chr20-15692963-15694264	5.8133e-34	1.11597	0.13	0.075	1.19598e-28	BX842702.1	31394	Superficial_Epithelial_0dpa_vs_1dpa	DAR
chr5-53683847-53684780	6.93446e-34	-2.6914	0.013	0.1	1.42664e-28	taf6	0	Superficial_Epithelial_0dpa_vs_1dpa	DAR
chr19-46474128-46475499	7.0979e-34	-1.64058	0.059	0.203	1.46027e-28	ext1b	0	Superficial_Epithelial_0dpa_vs_1dpa	DAR
chr15-8647235-8648806	7.83545e-34	-1.73386	0.044	0.157	1.612e-28	arhgap35a	0	Superficial_Epithelial_0dpa_vs_1dpa	DAR
chr5-51993625-51994569	8.00586e-34	-2.0533	0.033	0.152	1.64706e-28	serinc5	0	Superficial_Epithelial_0dpa_vs_1dpa	DAR
chr5-13494329-13495516	8.04129e-34	-1.97	0.037	0.146	1.65435e-28	cnnm4b	0	Superficial_Epithelial_0dpa_vs_1dpa	DAR
chr4-4729056-4730227	8.05001e-34	0.828045	0.245	0.164	1.65615e-28	creb3l2	0	Superficial_Epithelial_0dpa_vs_1dpa	DAR
chr3-31235039-31235891	8.56276e-34	-2.51898	0.019	0.119	1.76163e-28	syt17	8197	Superficial_Epithelial_0dpa_vs_1dpa	DAR
chr1-4164855-4165850	9.68333e-34	-2.17555	0.027	0.125	1.99217e-28	slitrk6	10522	Superficial_Epithelial_0dpa_vs_1dpa	DAR
chr10-42162426-42163545	1.015e-33	-1.50725	0.068	0.203	2.08817e-28	CR925773.1	0	Superficial_Epithelial_0dpa_vs_1dpa	DAR
chr3-54854380-54855206	1.06127e-33	-2.63567	0.016	0.101	2.18337e-28	mgrn1b	0	Superficial_Epithelial_0dpa_vs_1dpa	DAR
chr18-48323039-48324680	1.06409e-33	-1.71051	0.058	0.192	2.18917e-28	ets1	26245	Superficial_Epithelial_0dpa_vs_1dpa	DAR
chr10-33022081-33022688	1.1518e-33	-1.59558	0.059	0.19	2.36963e-28	cux1a	0	Superficial_Epithelial_0dpa_vs_1dpa	DAR
chr24-6543279-6544066	2.04271e-33	-2.18855	0.027	0.125	4.20251e-28	arhgap21a	0	Superficial_Epithelial_0dpa_vs_1dpa	DAR
chr23-10704110-10705289	2.75344e-33	-1.38494	0.076	0.215	5.66471e-28	foxp1a	0	Superficial_Epithelial_0dpa_vs_1dpa	DAR
chr17-45412904-45414048	2.92702e-33	-1.23082	0.116	0.29	6.02181e-28	ezra	0	Superficial_Epithelial_0dpa_vs_1dpa	DAR
chr24-10462896-10464433	3.13649e-33	-2.11691	0.038	0.156	6.45277e-28	CT573344.1	0	Superficial_Epithelial_0dpa_vs_1dpa	DAR
chr3-21456062-21456839	3.29206e-33	1.61718	0.1	0.035	6.77283e-28	BX927078.1	0	Superficial_Epithelial_0dpa_vs_1dpa	DAR
chr15-3322010-3322540	3.50556e-33	-1.45931	0.064	0.193	7.21206e-28	foxo1a	0	Superficial_Epithelial_0dpa_vs_1dpa	DAR
chr4-9121436-9122617	3.97044e-33	-1.27349	0.107	0.273	8.16846e-28	chst11	0	Superficial_Epithelial_0dpa_vs_1dpa	DAR
chr13-45109356-45110561	4.11457e-33	0.52759	0.435	0.38	8.46498e-28	runx3	0	Superficial_Epithelial_0dpa_vs_1dpa	DAR
chr20-41904442-41905324	4.39879e-33	-2.7252	0.016	0.104	9.04972e-28	cep85l	0	Superficial_Epithelial_0dpa_vs_1dpa	DAR
chr21-21232093-21233533	4.76892e-33	-2.65925	0.017	0.111	9.81119e-28	rictorb	0	Superficial_Epithelial_0dpa_vs_1dpa	DAR
chr22-29970248-29971929	4.83136e-33	-1.39371	0.08	0.238	9.93966e-28	si:dkey-286j15.3	18518	Superficial_Epithelial_0dpa_vs_1dpa	DAR
chr9-56078472-56079438	5.44391e-33	-1.75745	0.044	0.165	1.11999e-27	CABZ01032671.1	11587	Superficial_Epithelial_0dpa_vs_1dpa	DAR
chr4-22022420-22023480	5.96074e-33	-1.74883	0.045	0.168	1.22632e-27	ppfia2	0	Superficial_Epithelial_0dpa_vs_1dpa	DAR
chr23-410871-412595	6.01706e-33	0.897733	0.194	0.121	1.2379e-27	CU929146.1	0	Superficial_Epithelial_0dpa_vs_1dpa	DAR
chr5-42967315-42968659	6.95486e-33	-2.42604	0.024	0.121	1.43084e-27	mob1ba	4607	Superficial_Epithelial_0dpa_vs_1dpa	DAR
chr5-60200002-60200702	6.98259e-33	-2.26231	0.023	0.118	1.43654e-27	si:dkey-280e8.1	40499	Superficial_Epithelial_0dpa_vs_1dpa	DAR
chr17-16699816-16700770	7.51927e-33	-1.85434	0.04	0.156	1.54695e-27	foxn3	0	Superficial_Epithelial_0dpa_vs_1dpa	DAR
chr19-32343259-32344120	7.87206e-33	-2.24477	0.025	0.124	1.61954e-27	atxn1a	0	Superficial_Epithelial_0dpa_vs_1dpa	DAR
chr21-11116284-11117348	8.33765e-33	-2.61867	0.015	0.101	1.71532e-27	prlra	0	Superficial_Epithelial_0dpa_vs_1dpa	DAR
chr13-1484258-1485493	8.85672e-33	1.06066	0.162	0.094	1.82211e-27	si:ch211-165e15.1	0	Superficial_Epithelial_0dpa_vs_1dpa	DAR
chr7-49075121-49076212	1.1512e-32	-1.3161	0.089	0.253	2.36839e-27	b4galnt4b	2677	Superficial_Epithelial_0dpa_vs_1dpa	DAR
chr2-24530623-24531333	1.2055e-32	-1.77373	0.043	0.159	2.4801e-27	angptl4	5428	Superficial_Epithelial_0dpa_vs_1dpa	DAR
chr3-16903190-16904010	1.33844e-32	1.62099	0.101	0.036	2.7536e-27	BX470185.2	0	Superficial_Epithelial_0dpa_vs_1dpa	DAR
chr16-13870325-13871087	1.3717e-32	-1.62931	0.059	0.196	2.82203e-27	grwd1	0	Superficial_Epithelial_0dpa_vs_1dpa	DAR
chr24-24245117-24246091	1.42622e-32	-1.87441	0.039	0.159	2.93418e-27	rps6ka3b	0	Superficial_Epithelial_0dpa_vs_1dpa	DAR
chr20-34110628-34111888	1.52499e-32	-1.16588	0.111	0.28	3.1374e-27	ptgs2b	9929	Superficial_Epithelial_0dpa_vs_1dpa	DAR
chr2-786065-786488	1.77108e-32	-2.11129	0.027	0.13	3.64368e-27	CU861459.1	53200	Superficial_Epithelial_0dpa_vs_1dpa	DAR
chr9-21419045-21420287	1.77535e-32	-2.31899	0.022	0.119	3.65247e-27	gja3	9578	Superficial_Epithelial_0dpa_vs_1dpa	DAR
chr10-4522927-4524125	1.81921e-32	-2.26661	0.03	0.127	3.74271e-27	plk2a	14396	Superficial_Epithelial_0dpa_vs_1dpa	DAR
chr7-37927020-37928120	2.79785e-32	-1.61853	0.057	0.193	5.75607e-27	heatr3	7544	Superficial_Epithelial_0dpa_vs_1dpa	DAR
chr16-42738736-42740080	2.84406e-32	-1.32626	0.091	0.251	5.85114e-27	slc4a7	0	Superficial_Epithelial_0dpa_vs_1dpa	DAR
chr21-38161043-38161894	3.75813e-32	-2.38042	0.018	0.101	7.73169e-27	klf5l	7218	Superficial_Epithelial_0dpa_vs_1dpa	DAR
chr7-23549261-23550212	3.9467e-32	-1.10974	0.131	0.31	8.11962e-27	zgc:109889	5618	Superficial_Epithelial_0dpa_vs_1dpa	DAR
chr18-14372365-14373281	4.18114e-32	-2.29784	0.023	0.112	8.60195e-27	si:dkey-246g23.2	0	Superficial_Epithelial_0dpa_vs_1dpa	DAR
chr23-5750825-5752136	4.2542e-32	-1.63919	0.057	0.192	8.75225e-27	phlda3	4305	Superficial_Epithelial_0dpa_vs_1dpa	DAR
chr19-35488279-35488831	4.99684e-32	-2.23662	0.023	0.12	1.02801e-26	ptp4a2b	0	Superficial_Epithelial_0dpa_vs_1dpa	DAR
chr8-54014093-54015382	5.3198e-32	0.901915	0.203	0.134	1.09445e-26	CABZ01079663.1	0	Superficial_Epithelial_0dpa_vs_1dpa	DAR
chr14-49829703-49831756	5.42055e-32	-1.84524	0.041	0.167	1.11518e-26	nfkb1	0	Superficial_Epithelial_0dpa_vs_1dpa	DAR
chr3-48534997-48535928	5.67469e-32	-1.33179	0.087	0.243	1.16747e-26	atp5pd	13365	Superficial_Epithelial_0dpa_vs_1dpa	DAR
chr20-18223324-18225434	6.70972e-32	1.24651	0.129	0.063	1.3804e-26	kctd1	0	Superficial_Epithelial_0dpa_vs_1dpa	DAR
chr25-29668422-29668998	6.80033e-32	-2.09997	0.03	0.132	1.39905e-26	pim3	1519	Superficial_Epithelial_0dpa_vs_1dpa	DAR
chr16-22618008-22619155	7.38001e-32	-2.46105	0.02	0.104	1.51831e-26	chrnb2	0	Superficial_Epithelial_0dpa_vs_1dpa	DAR
chr12-45295217-45296176	8.93083e-32	-2.25128	0.023	0.114	1.83736e-26	fdxr	0	Superficial_Epithelial_0dpa_vs_1dpa	DAR
chr18-22197271-22198234	1.30514e-31	-2.48781	0.018	0.107	2.68509e-26	ripor1	0	Superficial_Epithelial_0dpa_vs_1dpa	DAR
chr5-29534493-29535127	1.61476e-31	-1.76762	0.04	0.152	3.32208e-26	AL831768.1	0	Superficial_Epithelial_0dpa_vs_1dpa	DAR
chr25-21381620-21382602	1.94603e-31	-1.68232	0.042	0.151	4.00361e-26	immp2l	0	Superficial_Epithelial_0dpa_vs_1dpa	DAR
chr9-30300541-30302638	1.99971e-31	-2.16561	0.032	0.146	4.11405e-26	srpx	0	Superficial_Epithelial_0dpa_vs_1dpa	DAR
chr20-22998158-22999457	2.09936e-31	-2.48654	0.017	0.103	4.31905e-26	BX511028.2	0	Superficial_Epithelial_0dpa_vs_1dpa	DAR
chr15-34971657-34972692	2.13332e-31	1.16749	0.144	0.077	4.38892e-26	si:ch73-95l15.5	0	Superficial_Epithelial_0dpa_vs_1dpa	DAR
chr10-18023310-18024594	2.14317e-31	-1.88017	0.036	0.141	4.40919e-26	si:dkey-242g16.2	34530	Superficial_Epithelial_0dpa_vs_1dpa	DAR
chr20-36566104-36566777	2.17509e-31	-2.18778	0.024	0.12	4.47486e-26	enah	0	Superficial_Epithelial_0dpa_vs_1dpa	DAR
chr11-39527602-39528522	2.47655e-31	-1.31934	0.092	0.249	5.09506e-26	CR847998.1	109217	Superficial_Epithelial_0dpa_vs_1dpa	DAR
chr11-2421125-2422087	2.62779e-31	-1.93135	0.033	0.135	5.4062e-26	ube2v1	0	Superficial_Epithelial_0dpa_vs_1dpa	DAR
chr17-37824279-37825431	2.70604e-31	-2.32795	0.02	0.104	5.5672e-26	zfp36l1a	28413	Superficial_Epithelial_0dpa_vs_1dpa	DAR
chr5-24169406-24170481	2.87405e-31	-1.71429	0.048	0.174	5.91284e-26	si:ch211-137i24.10	0	Superficial_Epithelial_0dpa_vs_1dpa	DAR
chr1-49958065-49959066	2.995e-31	-2.49211	0.021	0.112	6.16166e-26	gstcd	0	Superficial_Epithelial_0dpa_vs_1dpa	DAR
chr19-2592002-2593875	3.07974e-31	-1.71684	0.05	0.171	6.336e-26	si:ch73-345f18.3	0	Superficial_Epithelial_0dpa_vs_1dpa	DAR
chr12-26444996-26446165	3.30104e-31	-2.32166	0.025	0.121	6.7913e-26	itgb3b	0	Superficial_Epithelial_0dpa_vs_1dpa	DAR
chr16-35926435-35928039	3.3791e-31	-1.64955	0.048	0.169	6.95189e-26	sh3d21	0	Superficial_Epithelial_0dpa_vs_1dpa	DAR
chr21-13641751-13642937	3.62749e-31	-2.45691	0.019	0.11	7.46291e-26	pnpla7a	0	Superficial_Epithelial_0dpa_vs_1dpa	DAR
chr15-3346596-3347492	4.03631e-31	-1.44548	0.064	0.193	8.30398e-26	foxo1a	0	Superficial_Epithelial_0dpa_vs_1dpa	DAR
chr5-54929005-54930309	4.12275e-31	0.780896	0.229	0.153	8.48182e-26	cd180	8324	Superficial_Epithelial_0dpa_vs_1dpa	DAR
chr22-79343-81141	5.21907e-31	-0.783805	0.262	0.481	1.07373e-25	CABZ01101813.1	0	Superficial_Epithelial_0dpa_vs_1dpa	DAR
chr1-23813868-23814824	5.67131e-31	-1.8115	0.036	0.135	1.16677e-25	slit2	0	Superficial_Epithelial_0dpa_vs_1dpa	DAR
chr2-52293646-52294941	5.92673e-31	-1.36999	0.08	0.223	1.21932e-25	plpp2a	0	Superficial_Epithelial_0dpa_vs_1dpa	DAR
chr17-50496257-50497402	6.46566e-31	1.39565	0.109	0.046	1.33019e-25	zgc:113377	5781	Superficial_Epithelial_0dpa_vs_1dpa	DAR
chr11-19572250-19573452	6.57682e-31	-2.23195	0.021	0.104	1.35306e-25	atxn7	0	Superficial_Epithelial_0dpa_vs_1dpa	DAR
chr18-43926029-43927322	7.2092e-31	-1.41696	0.081	0.226	1.48316e-25	bcl9l	0	Superficial_Epithelial_0dpa_vs_1dpa	DAR
chr7-38155728-38156837	7.50124e-31	-0.891675	0.199	0.392	1.54324e-25	abcc12	1766	Superficial_Epithelial_0dpa_vs_1dpa	DAR
chr8-19196833-19197985	8.07664e-31	-2.38606	0.022	0.112	1.66162e-25	si:ch73-222f22.2	15881	Superficial_Epithelial_0dpa_vs_1dpa	DAR
chr17-1089514-1090558	8.12358e-31	-1.38376	0.088	0.245	1.67128e-25	dnajc17	0	Superficial_Epithelial_0dpa_vs_1dpa	DAR
chr7-24364117-24364979	9.92425e-31	-1.52672	0.068	0.214	2.04174e-25	txn	0	Superficial_Epithelial_0dpa_vs_1dpa	DAR
chr16-23280664-23281398	1.09838e-30	-1.81056	0.049	0.173	2.25973e-25	efna1b	1256	Superficial_Epithelial_0dpa_vs_1dpa	DAR
chr23-31299932-31301249	1.16372e-30	-1.96457	0.029	0.123	2.39415e-25	phip	0	Superficial_Epithelial_0dpa_vs_1dpa	DAR
chr2-7608812-7609743	1.19719e-30	-2.41673	0.017	0.1	2.463e-25	CABZ01021599.1	3690	Superficial_Epithelial_0dpa_vs_1dpa	DAR
chr1-46656747-46657750	1.49591e-30	-1.73053	0.046	0.169	3.07757e-25	arl11	2218	Superficial_Epithelial_0dpa_vs_1dpa	DAR
chr8-38349167-38349936	1.5843e-30	-2.27158	0.025	0.118	3.25942e-25	sorbs3	0	Superficial_Epithelial_0dpa_vs_1dpa	DAR
chr7-26631997-26632700	1.93123e-30	1.2695	0.111	0.058	3.97316e-25	hsbp1a	0	Superficial_Epithelial_0dpa_vs_1dpa	DAR
chr18-26084580-26087749	1.9336e-30	-1.47809	0.073	0.215	3.97803e-25	znf710a	0	Superficial_Epithelial_0dpa_vs_1dpa	DAR
chr25-16520870-16521259	2.5327e-30	-2.41839	0.017	0.103	5.21058e-25	si:ch211-266k8.4	0	Superficial_Epithelial_0dpa_vs_1dpa	DAR
chr9-38194264-38195308	2.58459e-30	-1.62353	0.056	0.188	5.31732e-25	clasp1a	0	Superficial_Epithelial_0dpa_vs_1dpa	DAR
chr25-34516630-34517327	2.67269e-30	-2.25383	0.024	0.116	5.49857e-25	BX323824.1	4152	Superficial_Epithelial_0dpa_vs_1dpa	DAR
chr6-35264720-35266364	2.71761e-30	-1.62831	0.048	0.172	5.591e-25	nos1apa	0	Superficial_Epithelial_0dpa_vs_1dpa	DAR
chr14-11443588-11444404	2.80778e-30	-1.31963	0.08	0.219	5.7765e-25	si:ch211-153b23.3	5527	Superficial_Epithelial_0dpa_vs_1dpa	DAR
chr15-35910203-35911589	3.10751e-30	-2.13025	0.029	0.127	6.39315e-25	irs1	0	Superficial_Epithelial_0dpa_vs_1dpa	DAR
chr19-31536747-31537402	3.81919e-30	-1.54343	0.055	0.18	7.8573e-25	tmem64	0	Superficial_Epithelial_0dpa_vs_1dpa	DAR
chr13-8603037-8603445	3.82199e-30	-2.0778	0.028	0.127	7.86305e-25	socs5b	1264	Superficial_Epithelial_0dpa_vs_1dpa	DAR
chr9-6458997-6459946	3.94146e-30	-1.995	0.028	0.117	8.10885e-25	nck2a	0	Superficial_Epithelial_0dpa_vs_1dpa	DAR
chr13-32312320-32313214	4.15172e-30	-2.28988	0.019	0.108	8.54142e-25	CR769766.1	79168	Superficial_Epithelial_0dpa_vs_1dpa	DAR
chr2-36947412-36948642	4.34925e-30	-1.29324	0.094	0.245	8.9478e-25	gadd45bb	5423	Superficial_Epithelial_0dpa_vs_1dpa	DAR
chr3-25928256-25929804	4.39078e-30	-1.34807	0.078	0.213	9.03324e-25	tom1	0	Superficial_Epithelial_0dpa_vs_1dpa	DAR
chr1-2069742-2071701	4.53205e-30	-1.35974	0.078	0.224	9.32388e-25	oxgr1a.2	2811	Superficial_Epithelial_0dpa_vs_1dpa	DAR
chr4-7750161-7751002	5.04677e-30	-1.27761	0.098	0.252	1.03828e-24	cdk17	0	Superficial_Epithelial_0dpa_vs_1dpa	DAR
chr15-31106418-31107467	5.11873e-30	-1.55156	0.065	0.203	1.05309e-24	ksr1b	0	Superficial_Epithelial_0dpa_vs_1dpa	DAR
chr7-17733885-17734615	5.143e-30	-1.53641	0.064	0.2	1.05808e-24	rtn3	0	Superficial_Epithelial_0dpa_vs_1dpa	DAR
chr16-49126551-49127350	5.48911e-30	1.42359	0.103	0.044	1.12929e-24	plcl2	0	Superficial_Epithelial_0dpa_vs_1dpa	DAR
chr18-18431425-18432366	5.6302e-30	-1.62944	0.055	0.176	1.15831e-24	siah1	6965	Superficial_Epithelial_0dpa_vs_1dpa	DAR
chr6-60093451-60095492	5.76655e-30	-1.74223	0.054	0.184	1.18636e-24	pmepa1	0	Superficial_Epithelial_0dpa_vs_1dpa	DAR
chr20-39755596-39756449	6.26372e-30	-2.01229	0.026	0.118	1.28865e-24	rnf217	0	Superficial_Epithelial_0dpa_vs_1dpa	DAR
chr23-25648176-25650100	6.38766e-30	-2.397	0.018	0.102	1.31415e-24	lrp1ab	0	Superficial_Epithelial_0dpa_vs_1dpa	DAR
chr24-34694578-34695737	6.95656e-30	-1.28394	0.093	0.252	1.43119e-24	ctnna1	13621	Superficial_Epithelial_0dpa_vs_1dpa	DAR
chr24-21142412-21143378	7.44748e-30	-1.38478	0.084	0.235	1.53219e-24	gramd1c	0	Superficial_Epithelial_0dpa_vs_1dpa	DAR
chr6-23987645-23988645	8.51442e-30	-1.79734	0.037	0.143	1.75169e-24	GNG12	0	Superficial_Epithelial_0dpa_vs_1dpa	DAR
chr2-35736131-35736686	8.88776e-30	-1.71938	0.045	0.16	1.8285e-24	rasal2	0	Superficial_Epithelial_0dpa_vs_1dpa	DAR
chr19-10448846-10449900	9.59126e-30	-1.31817	0.095	0.262	1.97323e-24	si:ch211-171h4.5	4404	Superficial_Epithelial_0dpa_vs_1dpa	DAR
chr11-3491066-3491474	1.07652e-29	-1.5829	0.049	0.16	2.21474e-24	acap3b	0	Superficial_Epithelial_0dpa_vs_1dpa	DAR
chr13-25390841-25391954	1.30034e-29	-1.70162	0.046	0.159	2.67521e-24	gsto1	1789	Superficial_Epithelial_0dpa_vs_1dpa	DAR
chr16-30023138-30025648	1.32368e-29	-1.56744	0.057	0.19	2.72324e-24	CR847566.1	0	Superficial_Epithelial_0dpa_vs_1dpa	DAR
chr11-20090640-20091421	1.65397e-29	-1.77353	0.038	0.136	3.40275e-24	ogfrl2	0	Superficial_Epithelial_0dpa_vs_1dpa	DAR
chr8-25926557-25927715	1.80187e-29	-1.3032	0.085	0.23	3.70702e-24	sema3h	0	Superficial_Epithelial_0dpa_vs_1dpa	DAR
chr6-52667331-52667904	2.13962e-29	-2.36652	0.02	0.107	4.40188e-24	sdc4	0	Superficial_Epithelial_0dpa_vs_1dpa	DAR
chr17-43763916-43765189	2.23336e-29	-2.11183	0.029	0.127	4.59474e-24	FO704797.1	45520	Superficial_Epithelial_0dpa_vs_1dpa	DAR
chr23-5408133-5409328	2.33038e-29	-2.31343	0.019	0.104	4.79434e-24	dre-let-7a-5	21867	Superficial_Epithelial_0dpa_vs_1dpa	DAR
chr8-43600140-43601803	2.36618e-29	-2.12757	0.021	0.104	4.868e-24	ncor2	25204	Superficial_Epithelial_0dpa_vs_1dpa	DAR
chr16-38381464-38382982	2.46236e-29	-1.55516	0.054	0.176	5.06587e-24	zgc:113232	0	Superficial_Epithelial_0dpa_vs_1dpa	DAR
chr16-10763853-10765295	2.6635e-29	1.07697	0.141	0.08	5.47967e-24	atp1a3b	11392	Superficial_Epithelial_0dpa_vs_1dpa	DAR
chr6-50528985-50529587	3.19569e-29	-2.1836	0.024	0.112	6.57455e-24	mtss1	51352	Superficial_Epithelial_0dpa_vs_1dpa	DAR
chr5-32023422-32023898	3.2041e-29	-1.44493	0.059	0.179	6.59187e-24	scai	0	Superficial_Epithelial_0dpa_vs_1dpa	DAR
chr2-23911724-23912665	3.39703e-29	-1.73882	0.041	0.147	6.98878e-24	tgfbr1a	0	Superficial_Epithelial_0dpa_vs_1dpa	DAR
chr15-28280082-28281728	4.04569e-29	-1.82243	0.039	0.153	8.32329e-24	myo1cb	0	Superficial_Epithelial_0dpa_vs_1dpa	DAR
chr23-22466850-22467973	5.11985e-29	-2.33777	0.023	0.115	1.05332e-23	spsb1	28340	Superficial_Epithelial_0dpa_vs_1dpa	DAR
chr21-10851702-10852435	5.16425e-29	-1.86802	0.037	0.145	1.06245e-23	oacyl	4773	Superficial_Epithelial_0dpa_vs_1dpa	DAR
chr24-8164185-8165149	6.04582e-29	-1.22287	0.088	0.228	1.24382e-23	CABZ01077956.1	0	Superficial_Epithelial_0dpa_vs_1dpa	DAR
chr23-36732386-36733126	6.45525e-29	-2.17861	0.023	0.114	1.32805e-23	CU571398.1	0	Superficial_Epithelial_0dpa_vs_1dpa	DAR
chr1-36823341-36824818	6.60068e-29	-1.53246	0.067	0.213	1.35797e-23	arhgap10	0	Superficial_Epithelial_0dpa_vs_1dpa	DAR
chr9-551192-552362	7.75413e-29	-1.65296	0.049	0.171	1.59527e-23	CU984600.3	2008	Superficial_Epithelial_0dpa_vs_1dpa	DAR
chr12-26795886-26796786	8.2208e-29	-2.02646	0.028	0.128	1.69128e-23	zeb1b	0	Superficial_Epithelial_0dpa_vs_1dpa	DAR
chr6-10044143-10044803	8.67972e-29	-2.09005	0.03	0.125	1.7857e-23	sucla2	0	Superficial_Epithelial_0dpa_vs_1dpa	DAR
chr23-4034162-4035687	9.05348e-29	-1.69293	0.046	0.162	1.86259e-23	b4galt5	0	Superficial_Epithelial_0dpa_vs_1dpa	DAR
chr2-42401256-42401798	1.19082e-28	-2.09492	0.026	0.118	2.44989e-23	slco5a1a	0	Superficial_Epithelial_0dpa_vs_1dpa	DAR
chr19-12500690-12502352	1.56581e-28	-2.17344	0.023	0.109	3.22137e-23	ldlrad4a	0	Superficial_Epithelial_0dpa_vs_1dpa	DAR
chr25-17852658-17853770	1.61718e-28	-1.3035	0.083	0.225	3.32707e-23	si:ch211-176l24.4	0	Superficial_Epithelial_0dpa_vs_1dpa	DAR
chr17-10141693-10142831	1.63337e-28	-2.34376	0.025	0.118	3.36037e-23	sec23a	0	Superficial_Epithelial_0dpa_vs_1dpa	DAR
chr13-27339691-27340258	1.80152e-28	-1.48296	0.057	0.173	3.7063e-23	ddx43	0	Superficial_Epithelial_0dpa_vs_1dpa	DAR
chr13-45122222-45123057	1.93122e-28	-2.08598	0.025	0.112	3.97314e-23	runx3	0	Superficial_Epithelial_0dpa_vs_1dpa	DAR
chr22-10963525-10964428	2.28109e-28	-2.20961	0.024	0.12	4.69293e-23	insrb	0	Superficial_Epithelial_0dpa_vs_1dpa	DAR
chr7-19331101-19332675	2.51383e-28	-1.56238	0.058	0.186	5.17175e-23	dock11	0	Superficial_Epithelial_0dpa_vs_1dpa	DAR
chr17-35912049-35913125	2.62109e-28	-2.42842	0.022	0.114	5.39243e-23	AL929378.2	0	Superficial_Epithelial_0dpa_vs_1dpa	DAR
chr9-31178565-31179498	2.62619e-28	-2.31101	0.02	0.109	5.40292e-23	clybl	0	Superficial_Epithelial_0dpa_vs_1dpa	DAR
chr6-1848649-1849533	2.7882e-28	-2.31781	0.018	0.101	5.73622e-23	dlgap4b	0	Superficial_Epithelial_0dpa_vs_1dpa	DAR
chr3-48429474-48430895	3.4729e-28	-1.96335	0.034	0.133	7.14487e-23	BX537276.1	30789	Superficial_Epithelial_0dpa_vs_1dpa	DAR
chr16-27234690-27236202	3.62116e-28	0.80372	0.197	0.129	7.44989e-23	sec61b	3030	Superficial_Epithelial_0dpa_vs_1dpa	DAR
chr2-3684622-3685193	3.78787e-28	-2.13414	0.026	0.116	7.79285e-23	mmp16b	6592	Superficial_Epithelial_0dpa_vs_1dpa	DAR
chr24-22030180-22031161	3.81919e-28	-1.34521	0.076	0.207	7.8573e-23	ropn1l	0	Superficial_Epithelial_0dpa_vs_1dpa	DAR
chr25-2448481-2449365	3.8666e-28	-1.60905	0.052	0.175	7.95483e-23	kcnq1.2	11906	Superficial_Epithelial_0dpa_vs_1dpa	DAR
chr12-48804779-48805604	3.93708e-28	-1.57792	0.053	0.176	8.09984e-23	ppifb	0	Superficial_Epithelial_0dpa_vs_1dpa	DAR
chr3-23485809-23486545	3.96749e-28	-1.17023	0.112	0.281	8.1624e-23	nr1d1	2106	Superficial_Epithelial_0dpa_vs_1dpa	DAR
chr16-25251882-25252819	4.19133e-28	-2.22603	0.026	0.118	8.62291e-23	klhl38b	1467	Superficial_Epithelial_0dpa_vs_1dpa	DAR
chr20-20358534-20360877	4.44788e-28	-1.84875	0.037	0.142	9.15071e-23	prkchb	0	Superficial_Epithelial_0dpa_vs_1dpa	DAR
chr11-29943766-29945373	4.93058e-28	-1.76515	0.038	0.143	1.01438e-22	zgc:113276	0	Superficial_Epithelial_0dpa_vs_1dpa	DAR
chr24-24250555-24251557	5.21202e-28	-1.20026	0.099	0.251	1.07228e-22	rps6ka3b	0	Superficial_Epithelial_0dpa_vs_1dpa	DAR
chr23-793631-794519	5.57934e-28	-2.11367	0.03	0.128	1.14785e-22	CU927920.1	3010	Superficial_Epithelial_0dpa_vs_1dpa	DAR
chr2-20902335-20903273	5.6417e-28	-1.64354	0.054	0.173	1.16068e-22	pdca	11905	Superficial_Epithelial_0dpa_vs_1dpa	DAR
chr24-2251099-2252171	6.10245e-28	-1.51596	0.057	0.181	1.25547e-22	cul2	31787	Superficial_Epithelial_0dpa_vs_1dpa	DAR
chr18-15912697-15914133	7.4083e-28	0.587034	0.303	0.239	1.52412e-22	plekhg7	0	Superficial_Epithelial_0dpa_vs_1dpa	DAR
chr4-8054044-8055164	9.08402e-28	-1.99305	0.028	0.118	1.86887e-22	wnk1b	0	Superficial_Epithelial_0dpa_vs_1dpa	DAR
chr11-1965710-1966336	1.03022e-27	-1.47977	0.063	0.195	2.11949e-22	nr1d4b	0	Superficial_Epithelial_0dpa_vs_1dpa	DAR
chr20-41875873-41877110	1.03948e-27	-2.24715	0.024	0.117	2.13854e-22	cep85l	0	Superficial_Epithelial_0dpa_vs_1dpa	DAR
chr19-1801044-1802077	1.15285e-27	-2.53648	0.017	0.104	2.37178e-22	ptk2aa	0	Superficial_Epithelial_0dpa_vs_1dpa	DAR
chr23-22115639-22116548	1.1561e-27	-2.36855	0.024	0.118	2.37847e-22	phc2a	0	Superficial_Epithelial_0dpa_vs_1dpa	DAR
chr4-13904774-13905572	1.2185e-27	-1.40956	0.066	0.201	2.50685e-22	pphln1	0	Superficial_Epithelial_0dpa_vs_1dpa	DAR
chr6-24105438-24106502	1.37743e-27	-2.30344	0.022	0.109	2.83382e-22	scinla	1771	Superficial_Epithelial_0dpa_vs_1dpa	DAR
chr20-28347868-28348488	1.43182e-27	-1.44777	0.063	0.186	2.94572e-22	ino80	0	Superficial_Epithelial_0dpa_vs_1dpa	DAR
chr16-33655755-33657841	1.49196e-27	-0.984379	0.164	0.36	3.06944e-22	fhl3a	0	Superficial_Epithelial_0dpa_vs_1dpa	DAR
chr13-47383194-47384035	1.5619e-27	-2.25854	0.022	0.104	3.21332e-22	bcl2l11	0	Superficial_Epithelial_0dpa_vs_1dpa	DAR
chr5-50933960-50935050	1.57715e-27	-1.34048	0.081	0.22	3.2447e-22	cert1a	0	Superficial_Epithelial_0dpa_vs_1dpa	DAR
chr24-19958230-19958939	1.62134e-27	-2.10773	0.024	0.115	3.33561e-22	LIMD2	27492	Superficial_Epithelial_0dpa_vs_1dpa	DAR
chr4-17946940-17947645	1.817e-27	1.11708	0.133	0.073	3.73815e-22	anks1b	0	Superficial_Epithelial_0dpa_vs_1dpa	DAR
chr1-44540645-44541462	1.85708e-27	-2.07569	0.026	0.114	3.82061e-22	zdhhc5a	0	Superficial_Epithelial_0dpa_vs_1dpa	DAR
chr20-1625749-1626703	1.87323e-27	-1.9526	0.03	0.126	3.85383e-22	CR846082.1	0	Superficial_Epithelial_0dpa_vs_1dpa	DAR
chr6-40284618-40285487	2.25083e-27	-2.27447	0.02	0.107	4.63069e-22	col7a1	0	Superficial_Epithelial_0dpa_vs_1dpa	DAR
chr9-25892242-25894078	2.71217e-27	1.16079	0.123	0.066	5.5798e-22	gtdc1	0	Superficial_Epithelial_0dpa_vs_1dpa	DAR
chr18-22747208-22748438	2.76477e-27	-2.1121	0.024	0.122	5.68802e-22	hsf4	0	Superficial_Epithelial_0dpa_vs_1dpa	DAR
chr16-35968197-35969123	2.81572e-27	1.07861	0.143	0.076	5.79284e-22	eva1ba	0	Superficial_Epithelial_0dpa_vs_1dpa	DAR
chr4-13916846-13917655	2.89854e-27	-1.98115	0.028	0.118	5.96323e-22	pphln1	0	Superficial_Epithelial_0dpa_vs_1dpa	DAR
chr18-45535484-45536433	2.97628e-27	-1.997	0.027	0.119	6.12316e-22	kifc3	0	Superficial_Epithelial_0dpa_vs_1dpa	DAR
chr7-24412034-24413068	3.103e-27	-1.39183	0.07	0.207	6.38386e-22	poln	0	Superficial_Epithelial_0dpa_vs_1dpa	DAR
chr14-52456276-52458177	3.16666e-27	-1.13686	0.111	0.272	6.51483e-22	b4galt1l	0	Superficial_Epithelial_0dpa_vs_1dpa	DAR
chr16-8866346-8867426	3.74651e-27	-1.60839	0.049	0.164	7.70777e-22	triob	0	Superficial_Epithelial_0dpa_vs_1dpa	DAR
chr18-35766830-35768011	3.84436e-27	-1.65286	0.055	0.191	7.90909e-22	rasgrp4	0	Superficial_Epithelial_0dpa_vs_1dpa	DAR
chr25-24682864-24684278	3.90911e-27	-1.36372	0.076	0.212	8.04228e-22	abtb2b	0	Superficial_Epithelial_0dpa_vs_1dpa	DAR
chr3-26846146-26847175	3.9822e-27	-2.26821	0.021	0.106	8.19265e-22	clec16a	0	Superficial_Epithelial_0dpa_vs_1dpa	DAR
chr6-36408387-36409982	4.2366e-27	-1.17258	0.102	0.255	8.71604e-22	rhcgl1	16699	Superficial_Epithelial_0dpa_vs_1dpa	DAR
chr19-2722110-2722759	4.5677e-27	-1.8091	0.043	0.161	9.39723e-22	rapgef5a	4059	Superficial_Epithelial_0dpa_vs_1dpa	DAR
chr4-11629717-11631671	4.91157e-27	0.565099	0.329	0.276	1.01047e-21	BX465862.4	0	Superficial_Epithelial_0dpa_vs_1dpa	DAR
chr3-37644353-37645354	5.0841e-27	-1.80665	0.037	0.132	1.04596e-21	BX640549.1	0	Superficial_Epithelial_0dpa_vs_1dpa	DAR
chr3-55035373-55036408	5.08467e-27	-2.04782	0.03	0.122	1.04608e-21	mpg	0	Superficial_Epithelial_0dpa_vs_1dpa	DAR
chr13-47351260-47353589	5.42352e-27	-2.41559	0.02	0.101	1.11579e-21	bcl2l11	7514	Superficial_Epithelial_0dpa_vs_1dpa	DAR
chr1-35511295-35512013	5.59436e-27	-1.69747	0.041	0.146	1.15094e-21	gab1	0	Superficial_Epithelial_0dpa_vs_1dpa	DAR
chr19-32403389-32404108	7.25783e-27	-1.28806	0.092	0.245	1.49317e-21	atxn1a	0	Superficial_Epithelial_0dpa_vs_1dpa	DAR
chr15-30160889-30161697	7.27345e-27	-1.26196	0.086	0.225	1.49638e-21	nlk2	0	Superficial_Epithelial_0dpa_vs_1dpa	DAR
chr18-50753530-50754345	7.39803e-27	-1.88856	0.036	0.141	1.52201e-21	zgc:158464	0	Superficial_Epithelial_0dpa_vs_1dpa	DAR
chr5-27855468-27856695	8.53738e-27	-1.72197	0.046	0.156	1.75641e-21	tcima	9953	Superficial_Epithelial_0dpa_vs_1dpa	DAR
chr13-51746738-51747508	8.79018e-27	0.944932	0.157	0.093	1.80842e-21	pwwp2b	15439	Superficial_Epithelial_0dpa_vs_1dpa	DAR
chr14-6469926-6471014	9.93426e-27	-1.95841	0.033	0.131	2.0438e-21	abca1b	0	Superficial_Epithelial_0dpa_vs_1dpa	DAR
chr2-45310989-45312074	9.98912e-27	-1.83469	0.046	0.159	2.05508e-21	camsap2b	0	Superficial_Epithelial_0dpa_vs_1dpa	DAR
chr22-29944036-29944936	1.00013e-26	-1.54707	0.051	0.165	2.05759e-21	dusp5	21163	Superficial_Epithelial_0dpa_vs_1dpa	DAR
chr15-3289823-3290470	1.02746e-26	0.588639	0.304	0.247	2.11382e-21	foxo1a	0	Superficial_Epithelial_0dpa_vs_1dpa	DAR
chr5-66125518-66126816	1.42929e-26	-1.56833	0.054	0.169	2.94051e-21	jak2b	3665	Superficial_Epithelial_0dpa_vs_1dpa	DAR
chr15-17369750-17370486	1.55686e-26	-1.37623	0.066	0.198	3.20297e-21	vmp1	0	Superficial_Epithelial_0dpa_vs_1dpa	DAR
chr15-20280964-20282133	1.69764e-26	-1.78903	0.047	0.169	3.49258e-21	plekhg2	0	Superficial_Epithelial_0dpa_vs_1dpa	DAR
chr16-22623275-22624317	1.81676e-26	-1.94506	0.029	0.116	3.73765e-21	chrnb2	0	Superficial_Epithelial_0dpa_vs_1dpa	DAR
chr8-13100853-13101649	1.90653e-26	-2.14445	0.025	0.113	3.92234e-21	sap30bp	2660	Superficial_Epithelial_0dpa_vs_1dpa	DAR
chr17-30614049-30615258	1.99049e-26	1.06816	0.125	0.069	4.09508e-21	sh3yl1	0	Superficial_Epithelial_0dpa_vs_1dpa	DAR
chr24-35662153-35663265	2.1565e-26	0.627626	0.24	0.195	4.43662e-21	mapre2	16531	Superficial_Epithelial_0dpa_vs_1dpa	DAR
chr2-37006447-37007785	2.16721e-26	-2.0701	0.029	0.128	4.45864e-21	gng7	0	Superficial_Epithelial_0dpa_vs_1dpa	DAR
chr13-49308428-49309274	2.23438e-26	0.861036	0.174	0.114	4.59683e-21	egln1a	101714	Superficial_Epithelial_0dpa_vs_1dpa	DAR
chr19-15293115-15294315	2.53955e-26	-1.65123	0.04	0.134	5.22468e-21	edn2	11118	Superficial_Epithelial_0dpa_vs_1dpa	DAR
chr8-23832858-23833872	2.5916e-26	-2.24311	0.023	0.108	5.33175e-21	mapk14a	0	Superficial_Epithelial_0dpa_vs_1dpa	DAR
chr1-41813396-41814139	2.76121e-26	-1.4434	0.057	0.171	5.6807e-21	rnf24	0	Superficial_Epithelial_0dpa_vs_1dpa	DAR
chr20-16652314-16652986	3.27318e-26	-1.92744	0.026	0.106	6.73399e-21	tmem30ab	0	Superficial_Epithelial_0dpa_vs_1dpa	DAR
chr23-17408822-17409435	3.43166e-26	-2.1657	0.022	0.104	7.06001e-21	ptk6b	4810	Superficial_Epithelial_0dpa_vs_1dpa	DAR
chr15-24902028-24902942	3.66517e-26	-1.52646	0.056	0.18	7.54043e-21	dre-mir-22a	5451	Superficial_Epithelial_0dpa_vs_1dpa	DAR
chr21-20036225-20037552	4.36602e-26	-1.79147	0.035	0.128	8.98231e-21	tnksa	0	Superficial_Epithelial_0dpa_vs_1dpa	DAR
chr10-15281820-15283201	4.80574e-26	-1.46406	0.066	0.193	9.88695e-21	vldlr	0	Superficial_Epithelial_0dpa_vs_1dpa	DAR
chr5-60191857-60192935	5.00538e-26	-1.45294	0.06	0.182	1.02977e-20	si:dkey-280e8.1	32354	Superficial_Epithelial_0dpa_vs_1dpa	DAR
chr16-30011687-30012854	5.31823e-26	-1.15427	0.095	0.243	1.09413e-20	CR847566.1	0	Superficial_Epithelial_0dpa_vs_1dpa	DAR
chr10-28298360-28299511	5.61597e-26	-1.52564	0.052	0.168	1.15539e-20	CR392341.5	5400	Superficial_Epithelial_0dpa_vs_1dpa	DAR
chr11-24098452-24100384	5.9523e-26	-0.966131	0.154	0.333	1.22458e-20	FP102969.1	15698	Superficial_Epithelial_0dpa_vs_1dpa	DAR
chr23-29880962-29881792	6.44564e-26	1.12692	0.104	0.055	1.32608e-20	aurkaip1	1423	Superficial_Epithelial_0dpa_vs_1dpa	DAR
chr7-18593407-18594810	6.44971e-26	-1.74643	0.044	0.157	1.32691e-20	dtx4a	0	Superficial_Epithelial_0dpa_vs_1dpa	DAR
chr6-30958723-30959520	6.85752e-26	-1.4482	0.058	0.176	1.41081e-20	pde4ba	4454	Superficial_Epithelial_0dpa_vs_1dpa	DAR
chr18-13113421-13114176	7.86944e-26	-2.00681	0.026	0.109	1.619e-20	rxylt1	0	Superficial_Epithelial_0dpa_vs_1dpa	DAR
chr19-353616-355830	7.92422e-26	0.665249	0.234	0.181	1.63027e-20	mcl1a	384	Superficial_Epithelial_0dpa_vs_1dpa	DAR
chr15-47372344-47374102	7.98583e-26	-1.18378	0.095	0.25	1.64294e-20	CABZ01099833.1	0	Superficial_Epithelial_0dpa_vs_1dpa	DAR
chr5-43734601-43736481	8.5849e-26	-1.74137	0.042	0.153	1.76619e-20	BX950211.1	6331	Superficial_Epithelial_0dpa_vs_1dpa	DAR
chr23-42865382-42866283	9.06468e-26	-1.8237	0.035	0.135	1.8649e-20	dlgap4a	0	Superficial_Epithelial_0dpa_vs_1dpa	DAR
chr7-54156699-54157670	1.21075e-25	-2.38518	0.019	0.102	2.4909e-20	csnk1g1	0	Superficial_Epithelial_0dpa_vs_1dpa	DAR
chr15-17809753-17810868	1.21166e-25	-1.98488	0.031	0.132	2.49277e-20	CT573342.2	0	Superficial_Epithelial_0dpa_vs_1dpa	DAR
chr15-15771112-15772216	1.74663e-25	-1.53947	0.053	0.164	3.59337e-20	si:ch211-33e4.3	0	Superficial_Epithelial_0dpa_vs_1dpa	DAR
chr18-9413439-9415383	1.77507e-25	-1.30087	0.087	0.231	3.65189e-20	sema3ab	0	Superficial_Epithelial_0dpa_vs_1dpa	DAR
chr21-656873-657848	1.77591e-25	-1.4232	0.067	0.195	3.65362e-20	CU694481.1	44229	Superficial_Epithelial_0dpa_vs_1dpa	DAR
chr5-43742286-43743432	1.8225e-25	-1.09957	0.117	0.273	3.74946e-20	BX950211.1	14016	Superficial_Epithelial_0dpa_vs_1dpa	DAR
chr11-25806467-25807623	1.83404e-25	-2.23072	0.02	0.104	3.7732e-20	skib	0	Superficial_Epithelial_0dpa_vs_1dpa	DAR
chr10-5480137-5481190	2.02657e-25	-1.1121	0.118	0.273	4.16931e-20	auh	4446	Superficial_Epithelial_0dpa_vs_1dpa	DAR
chr7-39409624-39411687	2.04461e-25	-1.2449	0.097	0.26	4.20643e-20	lsp1b	0	Superficial_Epithelial_0dpa_vs_1dpa	DAR
chr7-39168418-39170487	2.24756e-25	-2.24145	0.018	0.105	4.62395e-20	mdka	0	Superficial_Epithelial_0dpa_vs_1dpa	DAR
chr3-13380386-13381199	2.36472e-25	-1.79565	0.036	0.138	4.86498e-20	dre-mir-23a-2	25026	Superficial_Epithelial_0dpa_vs_1dpa	DAR
chr1-59209248-59211007	2.40018e-25	-1.25111	0.083	0.223	4.93793e-20	lpar2b	0	Superficial_Epithelial_0dpa_vs_1dpa	DAR
chr17-43700386-43701290	2.5641e-25	1.2667	0.106	0.05	5.27518e-20	FO704797.1	7108	Superficial_Epithelial_0dpa_vs_1dpa	DAR
chr9-34016788-34017487	2.66182e-25	-1.8461	0.031	0.123	5.47622e-20	AL590134.1	10278	Superficial_Epithelial_0dpa_vs_1dpa	DAR
chr14-14621080-14622391	3.26691e-25	-1.68943	0.04	0.138	6.72107e-20	fut11	0	Superficial_Epithelial_0dpa_vs_1dpa	DAR
chr12-34032833-34033845	3.65261e-25	-1.75453	0.037	0.133	7.5146e-20	timp2a	0	Superficial_Epithelial_0dpa_vs_1dpa	DAR
chr8-17290468-17291464	3.78473e-25	-1.146	0.102	0.259	7.7864e-20	BX465215.1	38113	Superficial_Epithelial_0dpa_vs_1dpa	DAR
chr16-4252702-4253669	3.78641e-25	0.720603	0.21	0.146	7.78986e-20	CU469524.2	10716	Superficial_Epithelial_0dpa_vs_1dpa	DAR
chr23-22771493-22772122	3.8018e-25	-1.1345	0.102	0.247	7.82153e-20	rerea	13252	Superficial_Epithelial_0dpa_vs_1dpa	DAR
chr3-39401953-39402830	3.83655e-25	1.18502	0.111	0.054	7.89301e-20	CU464118.1	0	Superficial_Epithelial_0dpa_vs_1dpa	DAR
chr11-24075683-24077112	4.22631e-25	-1.11873	0.106	0.254	8.69488e-20	CU571319.1	9660	Superficial_Epithelial_0dpa_vs_1dpa	DAR
chr24-39016208-39017344	4.24037e-25	-1.99419	0.03	0.125	8.72379e-20	capn15	10136	Superficial_Epithelial_0dpa_vs_1dpa	DAR
chr22-29335385-29336700	4.43346e-25	-1.26863	0.088	0.231	9.12104e-20	pdgfba	0	Superficial_Epithelial_0dpa_vs_1dpa	DAR
chr23-10138304-10139143	4.45382e-25	0.675848	0.228	0.176	9.16292e-20	plxnb1a	981	Superficial_Epithelial_0dpa_vs_1dpa	DAR
chr12-22318177-22319193	4.79238e-25	-1.48066	0.054	0.174	9.85947e-20	nsfb	0	Superficial_Epithelial_0dpa_vs_1dpa	DAR
chr2-49596008-49597654	4.952e-25	-2.33569	0.02	0.102	1.01878e-19	sema4e	0	Superficial_Epithelial_0dpa_vs_1dpa	DAR
chr11-40472207-40473040	6.32246e-25	-1.74544	0.035	0.125	1.30073e-19	si:dkeyp-61b2.1	0	Superficial_Epithelial_0dpa_vs_1dpa	DAR
chr10-43028345-43029518	6.44475e-25	0.855884	0.164	0.113	1.32589e-19	ssbp2	0	Superficial_Epithelial_0dpa_vs_1dpa	DAR
chr1-24921662-24922682	6.85742e-25	-1.04598	0.132	0.299	1.41079e-19	fbxw7	0	Superficial_Epithelial_0dpa_vs_1dpa	DAR
chr6-29891113-29893537	7.65686e-25	-1.49108	0.056	0.165	1.57526e-19	dlg1	0	Superficial_Epithelial_0dpa_vs_1dpa	DAR
chr7-30666240-30667568	7.68212e-25	-2.15373	0.021	0.102	1.58046e-19	myo1ea	0	Superficial_Epithelial_0dpa_vs_1dpa	DAR
chr2-56098268-56099379	7.75611e-25	-1.3136	0.078	0.217	1.59568e-19	si:ch211-178n15.1	2992	Superficial_Epithelial_0dpa_vs_1dpa	DAR
chr17-25384956-25385880	8.32702e-25	-1.50923	0.054	0.17	1.71313e-19	lck	2579	Superficial_Epithelial_0dpa_vs_1dpa	DAR
chr14-27952078-27953251	9.10623e-25	-1.30962	0.082	0.224	1.87344e-19	tsc22d3	45504	Superficial_Epithelial_0dpa_vs_1dpa	DAR
chr13-51579205-51580552	9.20711e-25	-1.71787	0.039	0.134	1.8942e-19	nkx6.2	0	Superficial_Epithelial_0dpa_vs_1dpa	DAR
chr5-58828620-58829255	9.22942e-25	-1.90625	0.026	0.107	1.89879e-19	arhgef12b	0	Superficial_Epithelial_0dpa_vs_1dpa	DAR
chr15-3706604-3707627	1.13694e-24	-1.44366	0.058	0.176	2.33905e-19	lpar6a	0	Superficial_Epithelial_0dpa_vs_1dpa	DAR
chr13-33626573-33627621	1.17403e-24	-1.55399	0.046	0.153	2.41535e-19	rrbp1a	0	Superficial_Epithelial_0dpa_vs_1dpa	DAR
chr20-19053950-19055249	1.31307e-24	-1.71673	0.042	0.144	2.7014e-19	pinx1	0	Superficial_Epithelial_0dpa_vs_1dpa	DAR
chr11-28224073-28225728	1.38606e-24	-1.90164	0.028	0.106	2.85158e-19	ephb2b	0	Superficial_Epithelial_0dpa_vs_1dpa	DAR
chr10-9136730-9137925	1.41718e-24	-1.91594	0.031	0.122	2.9156e-19	BX323017.1	3639	Superficial_Epithelial_0dpa_vs_1dpa	DAR
chr20-7825578-7826495	1.56899e-24	-2.07145	0.022	0.105	3.22791e-19	si:dkey-19f4.2	24235	Superficial_Epithelial_0dpa_vs_1dpa	DAR
chr9-41357514-41358290	1.57668e-24	-1.86194	0.03	0.118	3.24374e-19	glsb	6087	Superficial_Epithelial_0dpa_vs_1dpa	DAR
chr1-59216765-59217587	1.64097e-24	-0.988739	0.138	0.304	3.376e-19	akap8l	479	Superficial_Epithelial_0dpa_vs_1dpa	DAR
chr13-17092899-17094077	1.64197e-24	0.950886	0.152	0.089	3.37805e-19	lrmda	0	Superficial_Epithelial_0dpa_vs_1dpa	DAR
chr4-18970708-18971714	1.80968e-24	-1.61865	0.045	0.154	3.7231e-19	impdh1b	0	Superficial_Epithelial_0dpa_vs_1dpa	DAR
chr14-1122046-1122966	1.81247e-24	1.09987	0.106	0.058	3.72884e-19	si:ch1073-303k11.2	565	Superficial_Epithelial_0dpa_vs_1dpa	DAR
chr13-46177134-46179760	1.90747e-24	-1.9087	0.032	0.133	3.92427e-19	marcksl1a	0	Superficial_Epithelial_0dpa_vs_1dpa	DAR
chr20-24130546-24131371	1.99615e-24	-1.32114	0.083	0.222	4.10672e-19	BX119992.1	701	Superficial_Epithelial_0dpa_vs_1dpa	DAR
chr16-52355536-52356665	2.06239e-24	-1.09662	0.103	0.244	4.24299e-19	ifnlr1	0	Superficial_Epithelial_0dpa_vs_1dpa	DAR
chr9-18792278-18792796	2.07636e-24	-1.84237	0.03	0.118	4.27173e-19	tsc22d1	0	Superficial_Epithelial_0dpa_vs_1dpa	DAR
chr24-141280-142251	2.23633e-24	-1.38761	0.063	0.182	4.60084e-19	tgfbr1b	0	Superficial_Epithelial_0dpa_vs_1dpa	DAR
chr1-9475392-9476573	2.41253e-24	-1.04514	0.122	0.282	4.96335e-19	micall2b	0	Superficial_Epithelial_0dpa_vs_1dpa	DAR
chr7-37883520-37884981	2.42659e-24	-0.827677	0.197	0.382	4.99227e-19	tent4b	0	Superficial_Epithelial_0dpa_vs_1dpa	DAR
chr11-24065345-24065823	3.88967e-24	-1.5979	0.042	0.143	8.0023e-19	CU571319.1	0	Superficial_Epithelial_0dpa_vs_1dpa	DAR
chr5-32803943-32805205	4.13865e-24	-1.13818	0.101	0.246	8.51452e-19	ptpa	0	Superficial_Epithelial_0dpa_vs_1dpa	DAR
chr7-65371634-65372719	4.37198e-24	-2.13946	0.022	0.108	8.99456e-19	vat1l	0	Superficial_Epithelial_0dpa_vs_1dpa	DAR
chr21-45216694-45217500	4.85882e-24	-1.48346	0.053	0.161	9.99615e-19	si:ch73-269m14.3	5693	Superficial_Epithelial_0dpa_vs_1dpa	DAR
chr13-23409468-23410666	4.90531e-24	-1.89	0.028	0.115	1.00918e-18	khdrbs2	21333	Superficial_Epithelial_0dpa_vs_1dpa	DAR
chr11-18658690-18659695	5.26166e-24	-1.03065	0.117	0.27	1.08249e-18	ncoa3	0	Superficial_Epithelial_0dpa_vs_1dpa	DAR
chr8-17089306-17091938	5.34314e-24	-1.29083	0.076	0.207	1.09926e-18	BX510928.1	0	Superficial_Epithelial_0dpa_vs_1dpa	DAR
chr19-32401431-32402057	5.58259e-24	-2.05963	0.025	0.109	1.14852e-18	atxn1a	0	Superficial_Epithelial_0dpa_vs_1dpa	DAR
chr1-5385001-5386512	6.08141e-24	-1.01938	0.134	0.3	1.25114e-18	ndfip2	0	Superficial_Epithelial_0dpa_vs_1dpa	DAR
chr20-13953234-13954449	6.53833e-24	-1.69195	0.042	0.143	1.34514e-18	si:dkey-249p7.4	1656	Superficial_Epithelial_0dpa_vs_1dpa	DAR
chr4-7732083-7733396	6.58592e-24	-0.958985	0.144	0.301	1.35493e-18	cdk17	0	Superficial_Epithelial_0dpa_vs_1dpa	DAR
chr21-9243457-9244976	7.98563e-24	-1.69905	0.036	0.136	1.6429e-18	CR628389.1	7726	Superficial_Epithelial_0dpa_vs_1dpa	DAR
chr9-46922913-46924713	8.16904e-24	-1.87606	0.029	0.109	1.68063e-18	igfbp5b	80733	Superficial_Epithelial_0dpa_vs_1dpa	DAR
chr3-31134984-31135875	8.25162e-24	-1.49088	0.046	0.14	1.69762e-18	smg1	0	Superficial_Epithelial_0dpa_vs_1dpa	DAR
chr7-60379208-60380714	8.83581e-24	-2.08869	0.026	0.109	1.81781e-18	ppp1r14bb	0	Superficial_Epithelial_0dpa_vs_1dpa	DAR
chr22-6618315-6619370	9.1166e-24	0.71611	0.219	0.161	1.87558e-18	si:ch211-209l18.2	0	Superficial_Epithelial_0dpa_vs_1dpa	DAR
chr7-7872786-7873739	9.47516e-24	-2.22231	0.024	0.111	1.94934e-18	CABZ01030282.1	17150	Superficial_Epithelial_0dpa_vs_1dpa	DAR
chr2-32091333-32092311	9.66231e-24	-1.25277	0.083	0.221	1.98785e-18	CR391940.1	0	Superficial_Epithelial_0dpa_vs_1dpa	DAR
chr2-753644-754313	9.81118e-24	-1.58617	0.052	0.168	2.01847e-18	CU861459.1	20779	Superficial_Epithelial_0dpa_vs_1dpa	DAR
chr20-44002203-44003245	1.04919e-23	0.901431	0.146	0.093	2.15853e-18	runx2b	0	Superficial_Epithelial_0dpa_vs_1dpa	DAR
chr1-26627089-26627730	1.17085e-23	-1.49849	0.051	0.162	2.40881e-18	coro2a	0	Superficial_Epithelial_0dpa_vs_1dpa	DAR
chr21-17069225-17070229	1.19476e-23	-1.01608	0.128	0.286	2.458e-18	atp2a2b	0	Superficial_Epithelial_0dpa_vs_1dpa	DAR
chr11-6624042-6625423	1.24253e-23	0.652363	0.199	0.147	2.55627e-18	si:dkey-246j7.1	25542	Superficial_Epithelial_0dpa_vs_1dpa	DAR
chr3-48441540-48443515	1.28667e-23	-1.31017	0.075	0.199	2.64709e-18	BX537276.1	18169	Superficial_Epithelial_0dpa_vs_1dpa	DAR
chr16-35714190-35714969	1.29865e-23	-2.22368	0.019	0.101	2.67174e-18	map7d1a	0	Superficial_Epithelial_0dpa_vs_1dpa	DAR
chr21-22797634-22799789	1.29946e-23	-1.14744	0.096	0.235	2.67341e-18	trpc6a	1467	Superficial_Epithelial_0dpa_vs_1dpa	DAR
chr3-24986004-24987654	1.33991e-23	-0.855364	0.191	0.375	2.75663e-18	cbx7a	0	Superficial_Epithelial_0dpa_vs_1dpa	DAR
chr24-4263662-4265781	1.34063e-23	-1.76139	0.038	0.134	2.7581e-18	BX004842.1	52397	Superficial_Epithelial_0dpa_vs_1dpa	DAR
chr4-11501121-11502591	1.41316e-23	0.531621	0.285	0.234	2.90731e-18	asb13a.2	0	Superficial_Epithelial_0dpa_vs_1dpa	DAR
chr11-40775994-40776754	1.51927e-23	-1.58058	0.044	0.142	3.12562e-18	FP236327.1	14675	Superficial_Epithelial_0dpa_vs_1dpa	DAR
chr5-9534178-9535233	1.65438e-23	-1.67526	0.038	0.136	3.4036e-18	gak	0	Superficial_Epithelial_0dpa_vs_1dpa	DAR
chr18-25677927-25678961	1.90796e-23	-1.25928	0.082	0.211	3.92528e-18	fkbp16	0	Superficial_Epithelial_0dpa_vs_1dpa	DAR
chr23-3764489-3765463	2.04758e-23	-1.23816	0.082	0.209	4.21252e-18	hmga1a	4796	Superficial_Epithelial_0dpa_vs_1dpa	DAR
chr17-27228852-27230078	2.25568e-23	-1.50401	0.053	0.159	4.64066e-18	asap3	0	Superficial_Epithelial_0dpa_vs_1dpa	DAR
chr17-10481968-10482924	2.54366e-23	-1.69704	0.042	0.137	5.23312e-18	mipol1	0	Superficial_Epithelial_0dpa_vs_1dpa	DAR
chr11-13451871-13453342	2.7826e-23	-1.75882	0.041	0.141	5.72471e-18	homer3b	0	Superficial_Epithelial_0dpa_vs_1dpa	DAR
chr7-21647866-21648612	3.01183e-23	-1.56319	0.042	0.134	6.19629e-18	kdm6ba	0	Superficial_Epithelial_0dpa_vs_1dpa	DAR
chr13-23004642-23005181	3.18013e-23	-1.47379	0.057	0.173	6.54254e-18	hk1	0	Superficial_Epithelial_0dpa_vs_1dpa	DAR
chr24-28178013-28178654	3.71048e-23	-1.74019	0.028	0.105	7.63365e-18	bcl2a	0	Superficial_Epithelial_0dpa_vs_1dpa	DAR
chr8-19212324-19217285	3.77806e-23	-1.8085	0.035	0.129	7.77268e-18	si:ch73-222f22.2	0	Superficial_Epithelial_0dpa_vs_1dpa	DAR
chr9-24196563-24197700	3.80745e-23	-1.72207	0.035	0.127	7.83313e-18	stk17b	0	Superficial_Epithelial_0dpa_vs_1dpa	DAR
chr7-34722404-34725545	4.06131e-23	-1.03263	0.124	0.281	8.35541e-18	plekhg4	0	Superficial_Epithelial_0dpa_vs_1dpa	DAR
chr9-33947380-33948337	4.19858e-23	-2.01907	0.025	0.103	8.63782e-18	dre-mir-222a	25808	Superficial_Epithelial_0dpa_vs_1dpa	DAR
chr20-20247902-20249589	4.54224e-23	-1.48822	0.047	0.136	9.34483e-18	ppp2r5ea	0	Superficial_Epithelial_0dpa_vs_1dpa	DAR
chr15-14125796-14127976	4.63276e-23	-1.85097	0.033	0.123	9.53106e-18	clca1	5364	Superficial_Epithelial_0dpa_vs_1dpa	DAR
chr21-23519611-23520664	4.96448e-23	-2.29984	0.019	0.1	1.02135e-17	ncam1a	0	Superficial_Epithelial_0dpa_vs_1dpa	DAR
chr3-48461743-48462848	5.08103e-23	-0.927508	0.146	0.307	1.04533e-17	BX537276.1	0	Superficial_Epithelial_0dpa_vs_1dpa	DAR
chr7-37551270-37551897	5.19549e-23	-1.59455	0.04	0.13	1.06888e-17	cylda	0	Superficial_Epithelial_0dpa_vs_1dpa	DAR
chr4-3101069-3102123	5.4476e-23	-1.82889	0.036	0.129	1.12075e-17	plekha5	0	Superficial_Epithelial_0dpa_vs_1dpa	DAR
chr2-55527470-55528627	5.46791e-23	-2.06382	0.026	0.11	1.12492e-17	ap1m1	35154	Superficial_Epithelial_0dpa_vs_1dpa	DAR
chr7-48001856-48002854	5.5511e-23	-1.57914	0.039	0.133	1.14204e-17	mtss1lb	38935	Superficial_Epithelial_0dpa_vs_1dpa	DAR
chr24-20952105-20952782	5.59045e-23	-1.72835	0.036	0.127	1.15014e-17	CR450812.1	0	Superficial_Epithelial_0dpa_vs_1dpa	DAR
chr17-35362554-35363634	5.83906e-23	-1.25525	0.08	0.206	1.20128e-17	cmpk2	0	Superficial_Epithelial_0dpa_vs_1dpa	DAR
chr16-20879400-20881021	6.80605e-23	0.743251	0.177	0.124	1.40022e-17	hibadhb	0	Superficial_Epithelial_0dpa_vs_1dpa	DAR
chr17-41306282-41307171	6.9057e-23	-1.53046	0.051	0.16	1.42072e-17	fosl2	0	Superficial_Epithelial_0dpa_vs_1dpa	DAR
chr20-20819234-20819690	6.9665e-23	-1.62653	0.039	0.136	1.43323e-17	ckbb	0	Superficial_Epithelial_0dpa_vs_1dpa	DAR
chr10-17202002-17202659	7.41695e-23	-1.84348	0.027	0.104	1.5259e-17	depdc5	0	Superficial_Epithelial_0dpa_vs_1dpa	DAR
chr7-24355114-24356762	7.87778e-23	-1.8874	0.029	0.11	1.62071e-17	svep1	0	Superficial_Epithelial_0dpa_vs_1dpa	DAR
chr3-62188521-62189723	8.31799e-23	-1.66407	0.041	0.138	1.71128e-17	tbl3	0	Superficial_Epithelial_0dpa_vs_1dpa	DAR
chr5-1763474-1764888	8.47936e-23	-1.50934	0.053	0.168	1.74448e-17	mcc	0	Superficial_Epithelial_0dpa_vs_1dpa	DAR
chr17-37884784-37885660	8.69293e-23	-1.7813	0.031	0.116	1.78841e-17	BX248106.1	14760	Superficial_Epithelial_0dpa_vs_1dpa	DAR
chr11-25290854-25292233	1.03422e-22	-0.746232	0.219	0.397	2.12772e-17	cyldb	0	Superficial_Epithelial_0dpa_vs_1dpa	DAR
chr7-65624121-65625047	1.07705e-22	1.15021	0.1	0.049	2.21584e-17	mical2a	0	Superficial_Epithelial_0dpa_vs_1dpa	DAR
chr5-22795939-22798001	1.11679e-22	0.59751	0.229	0.176	2.29759e-17	npas2	0	Superficial_Epithelial_0dpa_vs_1dpa	DAR
chr10-44314220-44315424	1.16808e-22	-1.20975	0.081	0.213	2.40312e-17	zswim6	0	Superficial_Epithelial_0dpa_vs_1dpa	DAR
chr13-49325615-49327136	1.27343e-22	-1.67512	0.038	0.136	2.61984e-17	irf2bp2a	116089	Superficial_Epithelial_0dpa_vs_1dpa	DAR
chr10-10928468-10929969	1.41222e-22	-1.2567	0.078	0.21	2.90538e-17	exd3	0	Superficial_Epithelial_0dpa_vs_1dpa	DAR
chr24-40205139-40205560	1.44026e-22	-1.72341	0.032	0.114	2.96307e-17	scospondin	33677	Superficial_Epithelial_0dpa_vs_1dpa	DAR
chr22-30341764-30344783	1.52304e-22	-0.653142	0.288	0.49	3.13338e-17	mxi1	0	Superficial_Epithelial_0dpa_vs_1dpa	DAR
chr20-21542395-21543515	1.64086e-22	0.629977	0.222	0.163	3.37577e-17	BX276098.1	0	Superficial_Epithelial_0dpa_vs_1dpa	DAR
chr10-17097277-17098837	1.81661e-22	-1.44426	0.048	0.145	3.73735e-17	si:dkey-106l3.7	0	Superficial_Epithelial_0dpa_vs_1dpa	DAR
chr14-37568298-37569191	1.84448e-22	-0.891342	0.15	0.306	3.79468e-17	pcdh1b	0	Superficial_Epithelial_0dpa_vs_1dpa	DAR
chr20-20375507-20376501	2.01074e-22	-1.55444	0.044	0.143	4.13674e-17	prkchb	0	Superficial_Epithelial_0dpa_vs_1dpa	DAR
chr11-6115156-6117871	2.0282e-22	-0.831802	0.184	0.356	4.17266e-17	nr2f6b	0	Superficial_Epithelial_0dpa_vs_1dpa	DAR
chr14-5637264-5637886	2.04176e-22	0.784063	0.165	0.108	4.20056e-17	npm1b	0	Superficial_Epithelial_0dpa_vs_1dpa	DAR
chr2-41799040-41800061	2.04833e-22	-1.79222	0.037	0.132	4.21408e-17	keap1a	34963	Superficial_Epithelial_0dpa_vs_1dpa	DAR
chr7-34357808-34359230	2.08022e-22	-1.42631	0.057	0.171	4.27968e-17	madd	0	Superficial_Epithelial_0dpa_vs_1dpa	DAR
chr14-8083465-8083944	2.10952e-22	-1.42361	0.054	0.161	4.33996e-17	zgc:92242	3048	Superficial_Epithelial_0dpa_vs_1dpa	DAR
chr15-20277992-20278938	2.11489e-22	-1.60593	0.049	0.155	4.351e-17	plekhg2	2366	Superficial_Epithelial_0dpa_vs_1dpa	DAR
chr23-16863831-16864833	2.15558e-22	1.08893	0.106	0.055	4.43471e-17	zgc:114174	0	Superficial_Epithelial_0dpa_vs_1dpa	DAR
chr10-176280-178294	2.18745e-22	0.63257	0.211	0.165	4.50029e-17	erg	8497	Superficial_Epithelial_0dpa_vs_1dpa	DAR
chr16-4004576-4005661	2.26589e-22	-1.08049	0.11	0.247	4.66166e-17	zc3h12a	2832	Superficial_Epithelial_0dpa_vs_1dpa	DAR
chr8-52432828-52433867	2.28494e-22	-1.07639	0.113	0.265	4.70085e-17	gins4	1305	Superficial_Epithelial_0dpa_vs_1dpa	DAR
chr14-37681242-37683031	2.28591e-22	-0.994947	0.123	0.267	4.70284e-17	pcdh1b	0	Superficial_Epithelial_0dpa_vs_1dpa	DAR
chr23-11352935-11354404	2.32294e-22	-1.54263	0.047	0.145	4.77902e-17	chl1a	0	Superficial_Epithelial_0dpa_vs_1dpa	DAR
chr7-34838583-34839724	2.52883e-22	-1.7848	0.034	0.128	5.20261e-17	nfatc3a	0	Superficial_Epithelial_0dpa_vs_1dpa	DAR
chr4-4261211-4262831	2.95212e-22	-0.856412	0.182	0.366	6.07346e-17	cd9b	0	Superficial_Epithelial_0dpa_vs_1dpa	DAR
chr25-4586692-4587832	3.43783e-22	0.655416	0.207	0.15	7.07271e-17	CABZ01068600.1	0	Superficial_Epithelial_0dpa_vs_1dpa	DAR
chr1-51065745-51067108	3.4925e-22	0.724609	0.158	0.121	7.18519e-17	srd5a2a	0	Superficial_Epithelial_0dpa_vs_1dpa	DAR
chr23-7349513-7350469	3.72364e-22	-1.53348	0.043	0.135	7.66071e-17	si:dkeyp-73a2.2	0	Superficial_Epithelial_0dpa_vs_1dpa	DAR
chr1-52572526-52573786	4.03846e-22	-1.79346	0.031	0.117	8.30839e-17	abca1a	0	Superficial_Epithelial_0dpa_vs_1dpa	DAR
chr13-24243665-24245595	4.04433e-22	0.635871	0.217	0.16	8.32047e-17	urb2	0	Superficial_Epithelial_0dpa_vs_1dpa	DAR
chr3-25323847-25325601	4.06485e-22	-1.47763	0.053	0.152	8.3627e-17	smurf2	0	Superficial_Epithelial_0dpa_vs_1dpa	DAR
chr18-36647885-36649080	4.07109e-22	-2.1523	0.025	0.105	8.37553e-17	znf296	0	Superficial_Epithelial_0dpa_vs_1dpa	DAR
chr4-21017688-21018822	4.28097e-22	-1.55938	0.047	0.144	8.80732e-17	nav3	30123	Superficial_Epithelial_0dpa_vs_1dpa	DAR
chr18-25169456-25170751	4.37289e-22	-1.01727	0.116	0.259	8.99643e-17	slco3a1	0	Superficial_Epithelial_0dpa_vs_1dpa	DAR
chr11-18731781-18732626	4.38834e-22	-1.94804	0.025	0.105	9.02823e-17	CU207354.1	23732	Superficial_Epithelial_0dpa_vs_1dpa	DAR
chr13-17741933-17742716	4.42971e-22	-1.67819	0.033	0.113	9.11333e-17	march8	9149	Superficial_Epithelial_0dpa_vs_1dpa	DAR
chr12-28942262-28942862	4.49775e-22	-1.04615	0.111	0.259	9.25331e-17	AL732488.2	0	Superficial_Epithelial_0dpa_vs_1dpa	DAR
chr16-24412042-24413102	4.63847e-22	-1.73601	0.032	0.114	9.54281e-17	cadm4	0	Superficial_Epithelial_0dpa_vs_1dpa	DAR
chr19-3423360-3424191	4.85345e-22	-1.46793	0.054	0.157	9.9851e-17	hivep1	0	Superficial_Epithelial_0dpa_vs_1dpa	DAR
chr20-24035228-24036429	4.95914e-22	-1.86736	0.03	0.117	1.02025e-16	bach2b	0	Superficial_Epithelial_0dpa_vs_1dpa	DAR
chr21-3557340-3558078	5.31894e-22	-1.99716	0.024	0.109	1.09428e-16	dym	0	Superficial_Epithelial_0dpa_vs_1dpa	DAR
chr3-32973387-32974179	5.53588e-22	-1.46628	0.05	0.141	1.13891e-16	casp6b.2	0	Superficial_Epithelial_0dpa_vs_1dpa	DAR
chr20-37644536-37645338	5.56653e-22	0.713883	0.167	0.126	1.14521e-16	hivep2a	15451	Superficial_Epithelial_0dpa_vs_1dpa	DAR
chr4-4440681-4441662	5.64369e-22	1.01015	0.123	0.067	1.16109e-16	ntf3	8705	Superficial_Epithelial_0dpa_vs_1dpa	DAR
chr24-39757583-39759281	5.69485e-22	-1.84973	0.028	0.109	1.17161e-16	GFOD1	0	Superficial_Epithelial_0dpa_vs_1dpa	DAR
chr8-51578476-51580239	5.99815e-22	0.685986	0.192	0.133	1.23401e-16	ankrd39	0	Superficial_Epithelial_0dpa_vs_1dpa	DAR
chr15-25405465-25406247	6.24626e-22	-1.70173	0.032	0.113	1.28506e-16	tlcd2	0	Superficial_Epithelial_0dpa_vs_1dpa	DAR
chr11-5784818-5785848	6.58156e-22	-1.28232	0.068	0.185	1.35404e-16	arid3a	0	Superficial_Epithelial_0dpa_vs_1dpa	DAR
chr3-5217214-5218008	7.8169e-22	-1.68814	0.035	0.129	1.60819e-16	myh9b	0	Superficial_Epithelial_0dpa_vs_1dpa	DAR
chr24-2219350-2220645	8.26079e-22	-1.67309	0.042	0.141	1.69951e-16	cul2	63313	Superficial_Epithelial_0dpa_vs_1dpa	DAR
chr23-5718417-5719712	9.36822e-22	-1.10078	0.098	0.227	1.92734e-16	lad1	0	Superficial_Epithelial_0dpa_vs_1dpa	DAR
chr8-31003831-31005230	9.40118e-22	-1.47758	0.057	0.168	1.93412e-16	ptgesl	3056	Superficial_Epithelial_0dpa_vs_1dpa	DAR
chr14-26214328-26216456	9.59386e-22	-1.73764	0.04	0.137	1.97376e-16	gm2a	8084	Superficial_Epithelial_0dpa_vs_1dpa	DAR
chr16-46481280-46482696	9.73274e-22	-1.85419	0.035	0.132	2.00234e-16	rpz5	10059	Superficial_Epithelial_0dpa_vs_1dpa	DAR
chr12-48613560-48615133	1.10649e-21	0.898768	0.137	0.083	2.2764e-16	zgc:92749	0	Superficial_Epithelial_0dpa_vs_1dpa	DAR
chr3-42970271-42971012	1.19406e-21	-1.22117	0.078	0.196	2.45657e-16	mafk	0	Superficial_Epithelial_0dpa_vs_1dpa	DAR
chr2-15162708-15164394	1.32966e-21	-1.23973	0.075	0.192	2.73553e-16	arhgap29b	0	Superficial_Epithelial_0dpa_vs_1dpa	DAR
chr20-21953993-21954991	1.35262e-21	-0.979089	0.13	0.282	2.78277e-16	daam1b	0	Superficial_Epithelial_0dpa_vs_1dpa	DAR
chr14-28234071-28235321	1.41471e-21	-1.54531	0.05	0.156	2.91051e-16	mid2	46422	Superficial_Epithelial_0dpa_vs_1dpa	DAR
chr11-8621887-8622453	1.50398e-21	-1.7276	0.03	0.107	3.09416e-16	tbl1xr1a	0	Superficial_Epithelial_0dpa_vs_1dpa	DAR
chr20-54826002-54827428	1.54576e-21	-1.13111	0.101	0.239	3.18013e-16	CABZ01037174.1	1669	Superficial_Epithelial_0dpa_vs_1dpa	DAR
chr6-38852882-38854122	1.59148e-21	0.501412	0.294	0.258	3.27419e-16	stk35l	0	Superficial_Epithelial_0dpa_vs_1dpa	DAR
chr23-5721827-5722477	1.73537e-21	-1.60525	0.036	0.12	3.57021e-16	tnni1a	612	Superficial_Epithelial_0dpa_vs_1dpa	DAR
chr14-26275446-26276014	1.79367e-21	-1.6758	0.033	0.111	3.69015e-16	FO082779.2	0	Superficial_Epithelial_0dpa_vs_1dpa	DAR
chr18-17076967-17079127	1.82065e-21	0.659053	0.202	0.151	3.74567e-16	il17c	0	Superficial_Epithelial_0dpa_vs_1dpa	DAR
chr6-28811898-28813784	1.86179e-21	-0.912107	0.152	0.314	3.8303e-16	tp63	0	Superficial_Epithelial_0dpa_vs_1dpa	DAR
chr22-20376888-20378491	1.87832e-21	0.463989	0.313	0.282	3.86431e-16	zbtb7a	0	Superficial_Epithelial_0dpa_vs_1dpa	DAR
chr5-13479522-13480575	1.88386e-21	-1.84743	0.029	0.109	3.87569e-16	cnnm4b	0	Superficial_Epithelial_0dpa_vs_1dpa	DAR
chr17-51184401-51185170	1.90827e-21	-1.30608	0.067	0.18	3.92592e-16	paplna	0	Superficial_Epithelial_0dpa_vs_1dpa	DAR
chr4-14590446-14591160	1.93927e-21	-1.29265	0.069	0.187	3.98971e-16	plxnb2a	0	Superficial_Epithelial_0dpa_vs_1dpa	DAR
chr15-20102219-20103094	2.18948e-21	-1.73591	0.035	0.119	4.50445e-16	med13b	0	Superficial_Epithelial_0dpa_vs_1dpa	DAR
chr16-25708515-25709262	2.37548e-21	-1.60102	0.041	0.134	4.88713e-16	bcl3	0	Superficial_Epithelial_0dpa_vs_1dpa	DAR
chr2-15142268-15143429	2.56939e-21	-1.3642	0.066	0.184	5.28605e-16	arhgap29b	0	Superficial_Epithelial_0dpa_vs_1dpa	DAR
chr1-24460680-24461583	2.84351e-21	-1.55076	0.053	0.164	5.85002e-16	sh3d19	0	Superficial_Epithelial_0dpa_vs_1dpa	DAR
chr13-25176948-25177990	2.84935e-21	0.754325	0.162	0.109	5.86202e-16	adka	0	Superficial_Epithelial_0dpa_vs_1dpa	DAR
chr7-2042233-2043057	2.97513e-21	0.948929	0.139	0.081	6.1208e-16	si:cabz01007794.1	0	Superficial_Epithelial_0dpa_vs_1dpa	DAR
chr14-22657119-22658042	3.21556e-21	-1.41076	0.046	0.137	6.61543e-16	gfra4b	0	Superficial_Epithelial_0dpa_vs_1dpa	DAR
chr7-34771535-34772895	3.27963e-21	-1.97701	0.027	0.106	6.74724e-16	plekhg4	0	Superficial_Epithelial_0dpa_vs_1dpa	DAR
chr22-10563517-10564513	3.30136e-21	-1.55374	0.049	0.152	6.79195e-16	si:dkey-42i9.6	0	Superficial_Epithelial_0dpa_vs_1dpa	DAR
chr20-47462962-47464173	3.34981e-21	-1.72372	0.032	0.112	6.89164e-16	rab10	0	Superficial_Epithelial_0dpa_vs_1dpa	DAR
chr25-17015695-17017334	3.71858e-21	-1.1167	0.088	0.214	7.65031e-16	ccnd2a	0	Superficial_Epithelial_0dpa_vs_1dpa	DAR
chr19-1753613-1754347	4.16883e-21	-1.41575	0.055	0.159	8.57661e-16	dennd3a	15167	Superficial_Epithelial_0dpa_vs_1dpa	DAR
chr10-28269126-28269387	4.21131e-21	-1.81068	0.026	0.103	8.66401e-16	CU207388.1	16330	Superficial_Epithelial_0dpa_vs_1dpa	DAR
chr18-15999014-16000018	4.29689e-21	-1.51003	0.043	0.137	8.84008e-16	itpr2	0	Superficial_Epithelial_0dpa_vs_1dpa	DAR
chr13-9622440-9624107	4.92475e-21	-1.78006	0.039	0.139	1.01318e-15	slf2	0	Superficial_Epithelial_0dpa_vs_1dpa	DAR
chr13-39185978-39186649	5.01514e-21	-1.54999	0.042	0.136	1.03178e-15	fam135a	0	Superficial_Epithelial_0dpa_vs_1dpa	DAR
chr16-45943443-45944931	5.113e-21	-1.48853	0.049	0.156	1.05191e-15	otud7b	0	Superficial_Epithelial_0dpa_vs_1dpa	DAR
chr11-25793959-25794888	5.63471e-21	-1.25631	0.078	0.202	1.15924e-15	skib	0	Superficial_Epithelial_0dpa_vs_1dpa	DAR
chr16-53162452-53163148	5.65757e-21	1.03945	0.118	0.066	1.16394e-15	CABZ01053976.1	8832	Superficial_Epithelial_0dpa_vs_1dpa	DAR
chr13-47305600-47306384	5.83006e-21	-1.9854	0.023	0.102	1.19943e-15	bcl2l11	54719	Superficial_Epithelial_0dpa_vs_1dpa	DAR
chr19-12222771-12223719	6.37129e-21	-1.41052	0.058	0.171	1.31078e-15	znf706	9974	Superficial_Epithelial_0dpa_vs_1dpa	DAR
chr9-35853762-35855052	6.52087e-21	-1.06401	0.104	0.238	1.34155e-15	rcan1a	0	Superficial_Epithelial_0dpa_vs_1dpa	DAR
chr16-4273600-4274549	7.81084e-21	0.483961	0.316	0.279	1.60694e-15	vegfaa	12992	Superficial_Epithelial_0dpa_vs_1dpa	DAR
chr21-14414975-14416416	8.00821e-21	-1.59371	0.039	0.123	1.64755e-15	cacna1bb	0	Superficial_Epithelial_0dpa_vs_1dpa	DAR
chr22-18591407-18592261	8.27284e-21	-1.69582	0.037	0.13	1.70199e-15	cirbpb	44757	Superficial_Epithelial_0dpa_vs_1dpa	DAR
chr8-26954852-26956705	9.09128e-21	-1.57982	0.041	0.138	1.87037e-15	slc16a1b	0	Superficial_Epithelial_0dpa_vs_1dpa	DAR
chr11-31310854-31312365	9.39369e-21	-0.831407	0.18	0.352	1.93258e-15	si:dkey-238i5.2	0	Superficial_Epithelial_0dpa_vs_1dpa	DAR
chr7-51244836-51245645	9.76909e-21	-1.18736	0.085	0.218	2.00981e-15	CR354588.1	0	Superficial_Epithelial_0dpa_vs_1dpa	DAR
chr11-22012256-22013275	1.01978e-20	0.921609	0.105	0.07	2.09801e-15	foxp4	0	Superficial_Epithelial_0dpa_vs_1dpa	DAR
chr11-24737999-24739165	1.02775e-20	-1.19123	0.087	0.214	2.11442e-15	inavab	0	Superficial_Epithelial_0dpa_vs_1dpa	DAR
chr15-141258-142908	1.0393e-20	-0.970276	0.121	0.271	2.13817e-15	BX640522.1	0	Superficial_Epithelial_0dpa_vs_1dpa	DAR
chr5-39124142-39124996	1.10088e-20	-1.63493	0.036	0.121	2.26486e-15	bmp2k	0	Superficial_Epithelial_0dpa_vs_1dpa	DAR
chr8-44263757-44264856	1.11968e-20	1.03955	0.1	0.054	2.30355e-15	piwil1	0	Superficial_Epithelial_0dpa_vs_1dpa	DAR
chr9-33283026-33284323	1.26969e-20	-1.27427	0.061	0.158	2.61216e-15	usp9	0	Superficial_Epithelial_0dpa_vs_1dpa	DAR
chr14-36414491-36415804	1.4239e-20	-1.18814	0.081	0.207	2.92942e-15	neil3	0	Superficial_Epithelial_0dpa_vs_1dpa	DAR
chr13-17501432-17502748	1.51421e-20	-1.95346	0.031	0.116	3.11522e-15	znf503	30387	Superficial_Epithelial_0dpa_vs_1dpa	DAR
chr7-23659401-23660794	1.58872e-20	0.441521	0.331	0.305	3.26851e-15	si:dkey-172j4.3	0	Superficial_Epithelial_0dpa_vs_1dpa	DAR
chr4-20363875-20364876	1.62696e-20	0.759506	0.161	0.116	3.34718e-15	cacna1c	0	Superficial_Epithelial_0dpa_vs_1dpa	DAR
chr5-41464124-41465009	1.64161e-20	0.942631	0.12	0.071	3.37731e-15	pias2	11433	Superficial_Epithelial_0dpa_vs_1dpa	DAR
chr18-25673136-25674107	1.6824e-20	-2.00708	0.024	0.1	3.46124e-15	fkbp16	0	Superficial_Epithelial_0dpa_vs_1dpa	DAR
chr2-52788597-52789790	1.69156e-20	-1.41256	0.051	0.146	3.48008e-15	LO018490.1	0	Superficial_Epithelial_0dpa_vs_1dpa	DAR
chr9-44403643-44406710	1.88219e-20	0.692954	0.162	0.132	3.87227e-15	itprid2	0	Superficial_Epithelial_0dpa_vs_1dpa	DAR
chr20-23713759-23714656	1.91568e-20	-1.02053	0.114	0.252	3.94118e-15	nek1	0	Superficial_Epithelial_0dpa_vs_1dpa	DAR
chr9-9701422-9702405	2.13062e-20	-1.5647	0.046	0.149	4.38336e-15	gpr156	0	Superficial_Epithelial_0dpa_vs_1dpa	DAR
chr2-24615466-24617030	2.2613e-20	-1.06476	0.105	0.245	4.65221e-15	crtc1a	12140	Superficial_Epithelial_0dpa_vs_1dpa	DAR
chr24-28173955-28175629	2.32133e-20	-1.33139	0.055	0.152	4.77573e-15	bcl2a	0	Superficial_Epithelial_0dpa_vs_1dpa	DAR
chr17-38772249-38773244	2.33825e-20	0.950329	0.122	0.071	4.81052e-15	dglucy	0	Superficial_Epithelial_0dpa_vs_1dpa	DAR
chr15-25589727-25591733	2.353e-20	-1.87369	0.027	0.106	4.84087e-15	taok1a	0	Superficial_Epithelial_0dpa_vs_1dpa	DAR
chr2-25743705-25744679	2.49364e-20	-1.21992	0.08	0.203	5.13022e-15	tnika	0	Superficial_Epithelial_0dpa_vs_1dpa	DAR
chr23-24207612-24209165	2.49626e-20	-0.851962	0.159	0.316	5.13561e-15	plekhm2	0	Superficial_Epithelial_0dpa_vs_1dpa	DAR
chr8-12504634-12506107	2.59495e-20	-1.83498	0.026	0.104	5.33864e-15	CU639468.1	0	Superficial_Epithelial_0dpa_vs_1dpa	DAR
chr12-33866597-33867730	2.76273e-20	-1.08321	0.093	0.228	5.68381e-15	sema4gb	0	Superficial_Epithelial_0dpa_vs_1dpa	DAR
chr14-31142248-31143538	2.78891e-20	-0.969614	0.121	0.271	5.73768e-15	gpc4	0	Superficial_Epithelial_0dpa_vs_1dpa	DAR
chr7-59145248-59146527	2.82902e-20	-1.2313	0.075	0.187	5.8202e-15	BX005437.2	7250	Superficial_Epithelial_0dpa_vs_1dpa	DAR
chr14-51119183-51121742	2.86156e-20	-1.73088	0.034	0.126	5.88715e-15	pdlim7	0	Superficial_Epithelial_0dpa_vs_1dpa	DAR
chr5-15227345-15228345	2.87236e-20	1.08104	0.1	0.054	5.90937e-15	gnb1l	0	Superficial_Epithelial_0dpa_vs_1dpa	DAR
chr2-16246270-16247327	2.89965e-20	-1.32094	0.054	0.141	5.96552e-15	arhgef4	0	Superficial_Epithelial_0dpa_vs_1dpa	DAR
chr4-12802765-12803704	3.00162e-20	-0.884182	0.149	0.316	6.1753e-15	b2m	7275	Superficial_Epithelial_0dpa_vs_1dpa	DAR
chr18-44507450-44508333	3.07207e-20	-1.74068	0.036	0.124	6.32023e-15	aplp2	0	Superficial_Epithelial_0dpa_vs_1dpa	DAR
chr13-33275569-33276601	3.40285e-20	0.497327	0.283	0.237	7.00076e-15	tmem39b	0	Superficial_Epithelial_0dpa_vs_1dpa	DAR
chr23-38240227-38241205	3.53185e-20	-1.72088	0.036	0.125	7.26614e-15	znf217	4404	Superficial_Epithelial_0dpa_vs_1dpa	DAR
chr15-3319636-3320727	3.60126e-20	-1.52746	0.048	0.152	7.40894e-15	foxo1a	0	Superficial_Epithelial_0dpa_vs_1dpa	DAR
chr20-5019059-5020276	3.75825e-20	-1.8641	0.031	0.116	7.73192e-15	arid1b	0	Superficial_Epithelial_0dpa_vs_1dpa	DAR
chr5-31591169-31592418	3.78068e-20	-1.12922	0.089	0.212	7.77807e-15	si:dkey-220k22.1	168	Superficial_Epithelial_0dpa_vs_1dpa	DAR
chr13-7048296-7049879	4.0748e-20	-1.47558	0.048	0.143	8.38317e-15	rnaset2	0	Superficial_Epithelial_0dpa_vs_1dpa	DAR
chr11-1896237-1897265	4.12031e-20	-1.3764	0.062	0.176	8.4768e-15	rbms2a	0	Superficial_Epithelial_0dpa_vs_1dpa	DAR
chr8-11690717-11691222	4.50721e-20	-1.3492	0.06	0.166	9.27277e-15	atp2a2a	0	Superficial_Epithelial_0dpa_vs_1dpa	DAR
chr21-38572721-38573808	4.65722e-20	0.530002	0.245	0.206	9.5814e-15	pof1b	0	Superficial_Epithelial_0dpa_vs_1dpa	DAR
chr4-21538800-21539988	5.28944e-20	-1.507	0.055	0.165	1.08821e-14	ppp1r12a	0	Superficial_Epithelial_0dpa_vs_1dpa	DAR
chr10-13347262-13348171	5.38423e-20	-1.62926	0.033	0.12	1.10771e-14	il11ra	0	Superficial_Epithelial_0dpa_vs_1dpa	DAR
chr23-25555066-25555869	5.54383e-20	-1.55848	0.047	0.147	1.14054e-14	lrp1ab	0	Superficial_Epithelial_0dpa_vs_1dpa	DAR
chr6-43284589-43285677	5.81762e-20	-1.47517	0.048	0.148	1.19687e-14	frmd4ba	0	Superficial_Epithelial_0dpa_vs_1dpa	DAR
chr21-26752125-26753219	5.9751e-20	-1.38958	0.056	0.154	1.22927e-14	pcxa	0	Superficial_Epithelial_0dpa_vs_1dpa	DAR
chr20-43309003-43310038	6.16156e-20	-1.58678	0.04	0.128	1.26763e-14	afdna	0	Superficial_Epithelial_0dpa_vs_1dpa	DAR
chr17-12091128-12091451	6.17829e-20	-1.44008	0.042	0.124	1.27107e-14	cnsta	0	Superficial_Epithelial_0dpa_vs_1dpa	DAR
chr13-47414002-47414763	6.35131e-20	-1.55587	0.045	0.144	1.30667e-14	bcl2l11	10558	Superficial_Epithelial_0dpa_vs_1dpa	DAR
chr10-4373805-4375701	6.48065e-20	-1.55645	0.04	0.128	1.33328e-14	CABZ01073795.1	0	Superficial_Epithelial_0dpa_vs_1dpa	DAR
chr3-16176252-16177335	6.607e-20	-1.57592	0.038	0.125	1.35927e-14	cacnb1	0	Superficial_Epithelial_0dpa_vs_1dpa	DAR
chr9-18808708-18809479	6.66111e-20	-1.61806	0.038	0.127	1.3704e-14	tsc22d1	0	Superficial_Epithelial_0dpa_vs_1dpa	DAR
chr2-32145635-32147204	7.33728e-20	-2.02663	0.022	0.1	1.50951e-14	BX323880.1	26438	Superficial_Epithelial_0dpa_vs_1dpa	DAR
chr19-26766758-26767297	7.43695e-20	-1.76235	0.029	0.103	1.53002e-14	prrc2a	0	Superficial_Epithelial_0dpa_vs_1dpa	DAR
chr19-25104003-25105386	7.86711e-20	-1.07509	0.096	0.234	1.61852e-14	ptp4a3a	0	Superficial_Epithelial_0dpa_vs_1dpa	DAR
chr25-18498725-18499836	7.87049e-20	0.698358	0.16	0.113	1.61921e-14	tes	2314	Superficial_Epithelial_0dpa_vs_1dpa	DAR
chr9-45242388-45243054	9.54136e-20	-1.41832	0.056	0.168	1.96296e-14	BX005364.1	0	Superficial_Epithelial_0dpa_vs_1dpa	DAR
chr2-42874537-42875598	9.83507e-20	-1.19596	0.075	0.192	2.02339e-14	efr3a	0	Superficial_Epithelial_0dpa_vs_1dpa	DAR
chr16-24502408-24503743	9.98923e-20	-1.34934	0.05	0.136	2.0551e-14	cadm4	0	Superficial_Epithelial_0dpa_vs_1dpa	DAR
chr8-7588249-7589377	9.99841e-20	-1.12836	0.083	0.202	2.05699e-14	irak1	0	Superficial_Epithelial_0dpa_vs_1dpa	DAR
chr6-56225034-56226507	1.02904e-19	-1.66546	0.043	0.141	2.11707e-14	tfap2c	45326	Superficial_Epithelial_0dpa_vs_1dpa	DAR
chr25-12489452-12490050	1.1771e-19	-1.46562	0.039	0.119	2.42167e-14	map1lc3b	4028	Superficial_Epithelial_0dpa_vs_1dpa	DAR
chr13-24481428-24483008	1.20925e-19	-1.37917	0.054	0.156	2.48781e-14	sertad2b	17954	Superficial_Epithelial_0dpa_vs_1dpa	DAR
chr19-1988287-1989035	1.29381e-19	-1.58371	0.043	0.143	2.66178e-14	sh3bp5a	0	Superficial_Epithelial_0dpa_vs_1dpa	DAR
chr18-25904630-25905994	1.30834e-19	-1.83754	0.033	0.12	2.69167e-14	sema4ba	0	Superficial_Epithelial_0dpa_vs_1dpa	DAR
chr4-9172802-9173680	1.34808e-19	-1.5711	0.047	0.142	2.77344e-14	chst11	0	Superficial_Epithelial_0dpa_vs_1dpa	DAR
chr6-23990359-23991081	1.37323e-19	-1.09114	0.088	0.199	2.82517e-14	GNG12	0	Superficial_Epithelial_0dpa_vs_1dpa	DAR
chr13-2107778-2108587	1.47537e-19	-0.939478	0.136	0.286	3.03531e-14	fam83b	0	Superficial_Epithelial_0dpa_vs_1dpa	DAR
chr7-21773488-21774299	1.48098e-19	-1.2219	0.068	0.175	3.04685e-14	kdm6ba	0	Superficial_Epithelial_0dpa_vs_1dpa	DAR
chr23-21999160-22000090	1.49342e-19	-1.64206	0.031	0.108	3.07245e-14	eif4g3b	0	Superficial_Epithelial_0dpa_vs_1dpa	DAR
chr8-13299608-13300752	1.56733e-19	0.710646	0.166	0.115	3.22449e-14	kcnn1b	0	Superficial_Epithelial_0dpa_vs_1dpa	DAR
chr2-25197587-25198525	1.60228e-19	-1.2264	0.071	0.181	3.2964e-14	ppp2r3a	122	Superficial_Epithelial_0dpa_vs_1dpa	DAR
chr3-22866617-22867885	1.63716e-19	-1.27496	0.065	0.172	3.36815e-14	BX322574.1	0	Superficial_Epithelial_0dpa_vs_1dpa	DAR
chr11-10942956-10943687	1.64289e-19	-1.12708	0.083	0.199	3.37995e-14	rbms1a	0	Superficial_Epithelial_0dpa_vs_1dpa	DAR
chr23-31367460-31368259	1.6592e-19	-1.06393	0.1	0.227	3.4135e-14	hmgn3	0	Superficial_Epithelial_0dpa_vs_1dpa	DAR
chr5-24862838-24863827	1.69918e-19	-1.60538	0.036	0.114	3.49576e-14	gas2l1	0	Superficial_Epithelial_0dpa_vs_1dpa	DAR
chr15-3717249-3718321	1.70371e-19	-1.83962	0.03	0.115	3.50508e-14	lpar6a	0	Superficial_Epithelial_0dpa_vs_1dpa	DAR
chr22-23267220-23268231	1.70458e-19	-1.32863	0.062	0.17	3.50687e-14	C22H1orf53	0	Superficial_Epithelial_0dpa_vs_1dpa	DAR
chr13-25533466-25536061	1.73093e-19	-1.84832	0.027	0.104	3.56107e-14	mcmbp	0	Superficial_Epithelial_0dpa_vs_1dpa	DAR
chr18-39768776-39769471	1.84111e-19	-1.82948	0.026	0.1	3.78776e-14	dmxl2	0	Superficial_Epithelial_0dpa_vs_1dpa	DAR
chr24-26860361-26861776	1.87339e-19	-2.07759	0.024	0.106	3.85416e-14	fndc3bb	0	Superficial_Epithelial_0dpa_vs_1dpa	DAR
chr23-41751653-41752269	2.14129e-19	0.561802	0.22	0.174	4.40531e-14	stk35	0	Superficial_Epithelial_0dpa_vs_1dpa	DAR
chr18-34798347-34799638	2.25066e-19	-1.35749	0.058	0.16	4.63033e-14	CR626874.1	0	Superficial_Epithelial_0dpa_vs_1dpa	DAR
chr13-35777363-35779990	2.44895e-19	0.503728	0.218	0.188	5.03827e-14	agpat4	0	Superficial_Epithelial_0dpa_vs_1dpa	DAR
chr17-10312861-10314312	2.50793e-19	-1.67821	0.035	0.12	5.15962e-14	ttc6	0	Superficial_Epithelial_0dpa_vs_1dpa	DAR
chr20-43048805-43050236	2.55081e-19	-1.44514	0.054	0.159	5.24784e-14	snx9b	0	Superficial_Epithelial_0dpa_vs_1dpa	DAR
chr8-17514036-17514477	2.58074e-19	-1.50874	0.043	0.133	5.30941e-14	skia	0	Superficial_Epithelial_0dpa_vs_1dpa	DAR
chr1-24913912-24914741	2.59864e-19	-1.50168	0.048	0.145	5.34623e-14	fbxw7	0	Superficial_Epithelial_0dpa_vs_1dpa	DAR
chr23-33345397-33346471	2.60492e-19	0.975103	0.106	0.06	5.35915e-14	si:ch211-226m16.2	0	Superficial_Epithelial_0dpa_vs_1dpa	DAR
chr23-24733050-24734176	2.70251e-19	-1.27081	0.065	0.166	5.55993e-14	c1qtnf12	0	Superficial_Epithelial_0dpa_vs_1dpa	DAR
chr8-20117957-20119474	2.70396e-19	-0.925945	0.147	0.306	5.56291e-14	rfx2	0	Superficial_Epithelial_0dpa_vs_1dpa	DAR
chr10-15870674-15871667	2.81405e-19	-1.30461	0.067	0.186	5.7894e-14	tjp2a	0	Superficial_Epithelial_0dpa_vs_1dpa	DAR
chr24-2259559-2260454	2.91723e-19	-0.929775	0.128	0.28	6.00168e-14	cul2	23504	Superficial_Epithelial_0dpa_vs_1dpa	DAR
chr17-31447699-31448582	3.08151e-19	-1.4782	0.039	0.119	6.33965e-14	ltk	0	Superficial_Epithelial_0dpa_vs_1dpa	DAR
chr5-59277897-59278805	3.21308e-19	-1.54742	0.039	0.129	6.61034e-14	rasa4	0	Superficial_Epithelial_0dpa_vs_1dpa	DAR
chr5-2407868-2408923	3.297e-19	-1.06333	0.104	0.236	6.78299e-14	cita	630	Superficial_Epithelial_0dpa_vs_1dpa	DAR
chr23-18897316-18899039	3.33712e-19	-1.52173	0.041	0.132	6.86552e-14	CR847953.1	0	Superficial_Epithelial_0dpa_vs_1dpa	DAR
chr25-34451190-34452256	3.36198e-19	-1.63116	0.037	0.127	6.91667e-14	OTUD7A	0	Superficial_Epithelial_0dpa_vs_1dpa	DAR
chr15-45302603-45303596	3.51561e-19	-1.25508	0.061	0.161	7.23274e-14	CABZ01068244.1	8339	Superficial_Epithelial_0dpa_vs_1dpa	DAR
chr10-36785783-36786696	3.52889e-19	0.907116	0.122	0.076	7.26006e-14	dhrs13a.2	0	Superficial_Epithelial_0dpa_vs_1dpa	DAR
chr23-5772953-5774583	3.60563e-19	-1.44638	0.05	0.151	7.41793e-14	csrp1a	0	Superficial_Epithelial_0dpa_vs_1dpa	DAR
chr8-43507198-43508232	3.65522e-19	0.601782	0.199	0.152	7.51995e-14	ncor2	0	Superficial_Epithelial_0dpa_vs_1dpa	DAR
chr1-62999-63575	3.69606e-19	-1.43665	0.047	0.144	7.60399e-14	si:zfos-1011f11.2	0	Superficial_Epithelial_0dpa_vs_1dpa	DAR
chr23-27044041-27044806	3.75389e-19	0.697349	0.183	0.126	7.72294e-14	DTX3	0	Superficial_Epithelial_0dpa_vs_1dpa	DAR
chr9-55700162-55700814	3.79115e-19	-1.35991	0.059	0.165	7.79961e-14	FP236644.1	1538	Superficial_Epithelial_0dpa_vs_1dpa	DAR
chr17-23759317-23760939	3.99782e-19	-1.16098	0.079	0.187	8.22478e-14	SGMS1	0	Superficial_Epithelial_0dpa_vs_1dpa	DAR
chr8-9120385-9121667	4.00176e-19	-1.07949	0.096	0.23	8.23289e-14	slc6a8	1426	Superficial_Epithelial_0dpa_vs_1dpa	DAR
chr4-11843177-11844892	4.07401e-19	-1.71568	0.032	0.111	8.38154e-14	btbd11a	0	Superficial_Epithelial_0dpa_vs_1dpa	DAR
chr13-49417497-49418411	4.08015e-19	-1.39519	0.05	0.143	8.39417e-14	irf2bp2a	24814	Superficial_Epithelial_0dpa_vs_1dpa	DAR
chr1-19422528-19422974	4.28472e-19	0.692105	0.177	0.122	8.81505e-14	lap3	0	Superficial_Epithelial_0dpa_vs_1dpa	DAR
chr18-24954346-24955342	4.46014e-19	-1.18603	0.079	0.201	9.17594e-14	chd2	0	Superficial_Epithelial_0dpa_vs_1dpa	DAR
chr23-45627287-45628576	4.49086e-19	0.794548	0.144	0.093	9.23914e-14	dclk2b	4962	Superficial_Epithelial_0dpa_vs_1dpa	DAR
chr3-62431757-62432221	4.65884e-19	-1.26305	0.069	0.184	9.58472e-14	FP017215.1	679	Superficial_Epithelial_0dpa_vs_1dpa	DAR
chr5-59255131-59255883	4.69843e-19	-1.63102	0.04	0.128	9.66617e-14	upk3b	0	Superficial_Epithelial_0dpa_vs_1dpa	DAR
chr6-13729942-13730806	4.73756e-19	-1.28074	0.057	0.153	9.74667e-14	wnt6a	0	Superficial_Epithelial_0dpa_vs_1dpa	DAR
chr19-10451374-10451928	4.81527e-19	-1.22576	0.071	0.183	9.90655e-14	si:ch211-171h4.5	2376	Superficial_Epithelial_0dpa_vs_1dpa	DAR
chr7-54277504-54278345	4.88562e-19	-1.19274	0.069	0.17	1.00513e-13	pacsin3	0	Superficial_Epithelial_0dpa_vs_1dpa	DAR
chr11-18717165-18718096	4.89169e-19	-0.815427	0.175	0.336	1.00638e-13	CU207354.1	9116	Superficial_Epithelial_0dpa_vs_1dpa	DAR
chr22-11344974-11345998	5.01217e-19	-1.24035	0.073	0.181	1.03116e-13	BX323453.1	0	Superficial_Epithelial_0dpa_vs_1dpa	DAR
chr5-15314984-15315983	5.29849e-19	-0.864029	0.149	0.296	1.09007e-13	txnrd2.2	0	Superficial_Epithelial_0dpa_vs_1dpa	DAR
chr11-37035155-37035904	5.34655e-19	-1.24866	0.059	0.153	1.09996e-13	tkta	0	Superficial_Epithelial_0dpa_vs_1dpa	DAR
chr16-45734800-45735189	5.54725e-19	-1.23759	0.059	0.15	1.14125e-13	smg5	586	Superficial_Epithelial_0dpa_vs_1dpa	DAR
chr20-9555138-9558944	6.13703e-19	-1.04392	0.117	0.271	1.26258e-13	rad51b	0	Superficial_Epithelial_0dpa_vs_1dpa	DAR
chr18-38927890-38928662	6.31375e-19	-1.20139	0.072	0.195	1.29894e-13	myo5aa	0	Superficial_Epithelial_0dpa_vs_1dpa	DAR
chr17-993522-995103	6.7003e-19	-1.69604	0.034	0.124	1.37847e-13	cyp1c2	1405	Superficial_Epithelial_0dpa_vs_1dpa	DAR
chr14-23222141-23222670	6.77451e-19	-1.50421	0.037	0.118	1.39373e-13	enox2	0	Superficial_Epithelial_0dpa_vs_1dpa	DAR
chr9-14273092-14274231	6.79928e-19	-1.37444	0.056	0.155	1.39883e-13	abcb6b	0	Superficial_Epithelial_0dpa_vs_1dpa	DAR
chr11-16388209-16389956	6.87752e-19	-1.12117	0.083	0.209	1.41493e-13	lrig1	0	Superficial_Epithelial_0dpa_vs_1dpa	DAR
chr17-10466831-10468349	6.98289e-19	-0.703736	0.212	0.38	1.4366e-13	mipol1	0	Superficial_Epithelial_0dpa_vs_1dpa	DAR
chr5-37130840-37132096	7.24919e-19	-1.1391	0.081	0.193	1.49139e-13	lrch2	0	Superficial_Epithelial_0dpa_vs_1dpa	DAR
chr1-34638667-34639548	7.65997e-19	-1.81298	0.027	0.106	1.5759e-13	pibf1	0	Superficial_Epithelial_0dpa_vs_1dpa	DAR
chr1-4174041-4174953	7.72568e-19	-0.998086	0.115	0.25	1.58942e-13	slitrk6	19708	Superficial_Epithelial_0dpa_vs_1dpa	DAR
chr25-14535777-14537229	7.91459e-19	-0.831094	0.171	0.339	1.62828e-13	nav2b	0	Superficial_Epithelial_0dpa_vs_1dpa	DAR
chr9-33940376-33940879	8.83343e-19	-1.31471	0.06	0.167	1.81732e-13	dre-mir-222a	18804	Superficial_Epithelial_0dpa_vs_1dpa	DAR
chr12-34350290-34351791	8.85968e-19	-1.26819	0.06	0.157	1.82272e-13	tha1	26941	Superficial_Epithelial_0dpa_vs_1dpa	DAR
chr19-19530304-19531458	8.93354e-19	-0.818516	0.173	0.34	1.83791e-13	jazf1a	0	Superficial_Epithelial_0dpa_vs_1dpa	DAR
chr9-42449878-42451170	9.3655e-19	-1.18773	0.069	0.166	1.92678e-13	tfpia	0	Superficial_Epithelial_0dpa_vs_1dpa	DAR
chr10-102333-103522	1.01037e-18	-1.60425	0.034	0.106	2.07865e-13	ttc3	0	Superficial_Epithelial_0dpa_vs_1dpa	DAR
chr8-41627121-41628124	1.01479e-18	0.768739	0.15	0.099	2.08774e-13	BX005462.3	6100	Superficial_Epithelial_0dpa_vs_1dpa	DAR
chr3-8093692-8094314	1.05556e-18	0.950467	0.116	0.066	2.17162e-13	BX927317.3	0	Superficial_Epithelial_0dpa_vs_1dpa	DAR
chr13-24029036-24030028	1.11564e-18	-1.64811	0.03	0.109	2.29522e-13	pgbd5	0	Superficial_Epithelial_0dpa_vs_1dpa	DAR
chr18-31064654-31065886	1.13786e-18	0.470805	0.288	0.239	2.34093e-13	mvda	0	Superficial_Epithelial_0dpa_vs_1dpa	DAR
chr1-8122786-8123901	1.14413e-18	-1.58656	0.04	0.128	2.35383e-13	SLC5A10	0	Superficial_Epithelial_0dpa_vs_1dpa	DAR
chr7-5474860-5476147	1.16715e-18	-1.38518	0.049	0.139	2.4012e-13	arhgef11	0	Superficial_Epithelial_0dpa_vs_1dpa	DAR
chr11-23067062-23068111	1.20282e-18	-1.80443	0.026	0.1	2.47458e-13	atp2b4	0	Superficial_Epithelial_0dpa_vs_1dpa	DAR
chr17-16663430-16664371	1.35291e-18	-1.76729	0.027	0.102	2.78336e-13	foxn3	0	Superficial_Epithelial_0dpa_vs_1dpa	DAR
chr5-18882064-18882858	1.36336e-18	-1.04611	0.093	0.215	2.80487e-13	aacs	0	Superficial_Epithelial_0dpa_vs_1dpa	DAR
chr15-17817847-17819317	1.44341e-18	-1.69741	0.033	0.116	2.96956e-13	CT573342.2	4166	Superficial_Epithelial_0dpa_vs_1dpa	DAR
chr19-29713456-29714175	1.45791e-18	-1.52125	0.036	0.115	2.99939e-13	CU861666.1	70919	Superficial_Epithelial_0dpa_vs_1dpa	DAR
chr14-23731491-23732712	1.46628e-18	-1.47341	0.04	0.123	3.0166e-13	fgf1a	0	Superficial_Epithelial_0dpa_vs_1dpa	DAR
chr14-25006768-25007409	1.50647e-18	-1.33876	0.053	0.149	3.09928e-13	pde6a	0	Superficial_Epithelial_0dpa_vs_1dpa	DAR
chr22-16083902-16084930	1.62813e-18	-1.4741	0.04	0.126	3.34958e-13	dph5	12254	Superficial_Epithelial_0dpa_vs_1dpa	DAR
chr17-40949012-40950946	1.69306e-18	-1.44795	0.045	0.133	3.48318e-13	si:dkey-16j16.4	0	Superficial_Epithelial_0dpa_vs_1dpa	DAR
chr18-18884873-18885864	1.70972e-18	-1.34783	0.056	0.154	3.51744e-13	arih1	0	Superficial_Epithelial_0dpa_vs_1dpa	DAR
chr16-22372461-22373367	1.72019e-18	0.364726	0.38	0.369	3.53899e-13	tuft1a	0	Superficial_Epithelial_0dpa_vs_1dpa	DAR
chr24-33526914-33528057	1.75302e-18	0.648444	0.182	0.135	3.60651e-13	LO018309.1	24140	Superficial_Epithelial_0dpa_vs_1dpa	DAR
chr3-9997749-9998497	1.80744e-18	-1.41556	0.044	0.127	3.71849e-13	FP243382.1	0	Superficial_Epithelial_0dpa_vs_1dpa	DAR
chr19-26052454-26053696	1.83876e-18	-1.65008	0.037	0.123	3.78292e-13	jarid2b	0	Superficial_Epithelial_0dpa_vs_1dpa	DAR
chr10-8212689-8213939	1.85488e-18	0.477258	0.24	0.206	3.81608e-13	mtrex	0	Superficial_Epithelial_0dpa_vs_1dpa	DAR
chr8-10315518-10316544	1.87117e-18	-1.0401	0.099	0.218	3.8496e-13	pim1	6746	Superficial_Epithelial_0dpa_vs_1dpa	DAR
chr1-39960550-39961459	1.93206e-18	-1.55009	0.042	0.13	3.97487e-13	stox2a	0	Superficial_Epithelial_0dpa_vs_1dpa	DAR
chr9-39791993-39792895	2.03616e-18	0.629062	0.204	0.151	4.18903e-13	ikzf2	167222	Superficial_Epithelial_0dpa_vs_1dpa	DAR
chr2-37002552-37003780	2.0397e-18	-0.966343	0.11	0.237	4.19632e-13	gng7	0	Superficial_Epithelial_0dpa_vs_1dpa	DAR
chr5-64536482-64537172	2.10876e-18	-1.23756	0.065	0.169	4.33839e-13	rxrab	25053	Superficial_Epithelial_0dpa_vs_1dpa	DAR
chr22-29424594-29425552	2.15536e-18	-1.04584	0.102	0.227	4.43426e-13	pdgfba	88284	Superficial_Epithelial_0dpa_vs_1dpa	DAR
chr16-40550874-40552114	2.18723e-18	0.609052	0.209	0.162	4.49983e-13	BX324007.2	0	Superficial_Epithelial_0dpa_vs_1dpa	DAR
chr9-7652409-7652818	2.28265e-18	-1.05991	0.083	0.186	4.69615e-13	dnajb2	0	Superficial_Epithelial_0dpa_vs_1dpa	DAR
chr20-32315032-32315830	2.31507e-18	-1.77089	0.027	0.102	4.76284e-13	foxo3b	0	Superficial_Epithelial_0dpa_vs_1dpa	DAR
chr16-44781319-44782277	2.45569e-18	0.752957	0.129	0.092	5.05214e-13	upk1a	574	Superficial_Epithelial_0dpa_vs_1dpa	DAR
chr21-41422616-41423539	2.69363e-18	0.781305	0.134	0.09	5.54166e-13	bod1	44670	Superficial_Epithelial_0dpa_vs_1dpa	DAR
chr1-51793937-51795522	2.78181e-18	-1.7082	0.033	0.117	5.72308e-13	BX548032.3	0	Superficial_Epithelial_0dpa_vs_1dpa	DAR
chr6-11848480-11851161	2.8232e-18	-0.909944	0.151	0.309	5.80823e-13	baz2ba	0	Superficial_Epithelial_0dpa_vs_1dpa	DAR
chr22-36177481-36178387	2.90623e-18	0.774524	0.1	0.071	5.97904e-13	LO016985.1	9002	Superficial_Epithelial_0dpa_vs_1dpa	DAR
chr5-13766539-13769120	2.95533e-18	0.318141	0.454	0.452	6.08006e-13	snrnp27	0	Superficial_Epithelial_0dpa_vs_1dpa	DAR
chr18-15572980-15574029	2.97707e-18	-2.03396	0.028	0.106	6.12478e-13	arntl2	0	Superficial_Epithelial_0dpa_vs_1dpa	DAR
chr18-12134728-12136177	3.10227e-18	-0.826469	0.156	0.308	6.38236e-13	fgd4a	11793	Superficial_Epithelial_0dpa_vs_1dpa	DAR
chr22-15791988-15792697	3.10569e-18	-1.2358	0.064	0.162	6.38941e-13	BX323550.5	0	Superficial_Epithelial_0dpa_vs_1dpa	DAR
chr10-15012090-15012574	3.26357e-18	-1.16408	0.071	0.168	6.71421e-13	si:dkey-88l16.3	0	Superficial_Epithelial_0dpa_vs_1dpa	DAR
chr20-32524613-32525595	3.61497e-18	-0.946948	0.115	0.254	7.43715e-13	scml4	0	Superficial_Epithelial_0dpa_vs_1dpa	DAR
chr3-14829578-14830848	3.75137e-18	0.422011	0.311	0.281	7.71776e-13	nfixb	0	Superficial_Epithelial_0dpa_vs_1dpa	DAR
chr1-59518799-59519834	3.9155e-18	0.450404	0.302	0.256	8.05544e-13	FP236157.1	465	Superficial_Epithelial_0dpa_vs_1dpa	DAR
chr13-17124612-17126461	3.95292e-18	-0.965644	0.113	0.235	8.13243e-13	lrmda	0	Superficial_Epithelial_0dpa_vs_1dpa	DAR
chr16-20391780-20392954	4.02964e-18	-1.13546	0.081	0.195	8.29026e-13	chn2	0	Superficial_Epithelial_0dpa_vs_1dpa	DAR
chr4-11552351-11553578	4.05361e-18	-1.60106	0.039	0.127	8.33958e-13	BX465862.5	12461	Superficial_Epithelial_0dpa_vs_1dpa	DAR
chr19-31892042-31893212	4.22593e-18	-1.48679	0.039	0.118	8.69409e-13	zbtb10	0	Superficial_Epithelial_0dpa_vs_1dpa	DAR
chr22-30348085-30348947	4.28638e-18	-0.897879	0.135	0.274	8.81845e-13	mxi1	0	Superficial_Epithelial_0dpa_vs_1dpa	DAR
chr8-10319481-10320352	4.32924e-18	-0.856076	0.154	0.301	8.90663e-13	CU694808.1	3090	Superficial_Epithelial_0dpa_vs_1dpa	DAR
chr14-49389319-49389960	4.47767e-18	-1.09492	0.084	0.198	9.21199e-13	tnip1	0	Superficial_Epithelial_0dpa_vs_1dpa	DAR
chr4-15048998-15050064	4.60515e-18	-1.35462	0.052	0.146	9.47427e-13	ube2h	0	Superficial_Epithelial_0dpa_vs_1dpa	DAR
chr20-24962292-24963727	5.2947e-18	-0.973525	0.127	0.268	1.08929e-12	epha7	0	Superficial_Epithelial_0dpa_vs_1dpa	DAR
chr21-21017242-21018572	5.37853e-18	-1.99621	0.027	0.105	1.10654e-12	eif4ebp1	0	Superficial_Epithelial_0dpa_vs_1dpa	DAR
chr5-59157774-59159228	5.38467e-18	0.47998	0.225	0.193	1.1078e-12	si:ch211-284f22.3	0	Superficial_Epithelial_0dpa_vs_1dpa	DAR
chr3-24650088-24651069	5.51302e-18	-1.56185	0.037	0.12	1.1342e-12	zgc:113411	193	Superficial_Epithelial_0dpa_vs_1dpa	DAR
chr5-59249698-59251009	6.03588e-18	-1.42989	0.047	0.133	1.24177e-12	prkrip1	1423	Superficial_Epithelial_0dpa_vs_1dpa	DAR
chr16-3979509-3980704	6.15996e-18	-1.46977	0.039	0.115	1.2673e-12	zc3h12a	1885	Superficial_Epithelial_0dpa_vs_1dpa	DAR
chr13-4827033-4829164	6.2128e-18	0.555613	0.208	0.159	1.27817e-12	mcu	0	Superficial_Epithelial_0dpa_vs_1dpa	DAR
chr21-22512981-22513752	6.25498e-18	-1.55313	0.037	0.117	1.28685e-12	myo5b	0	Superficial_Epithelial_0dpa_vs_1dpa	DAR
chr3-26063164-26064848	6.32961e-18	-0.780718	0.188	0.352	1.3022e-12	si:dkeyp-69e1.8	0	Superficial_Epithelial_0dpa_vs_1dpa	DAR
chr24-35187259-35188035	6.7901e-18	0.728454	0.12	0.084	1.39694e-12	pcmtd1	0	Superficial_Epithelial_0dpa_vs_1dpa	DAR
chr5-69490259-69492154	6.82956e-18	0.470383	0.287	0.238	1.40506e-12	psat1	0	Superficial_Epithelial_0dpa_vs_1dpa	DAR
chr18-21131399-21132280	6.97787e-18	-1.5407	0.035	0.114	1.43557e-12	chka	0	Superficial_Epithelial_0dpa_vs_1dpa	DAR
chr13-22679251-22681350	6.99186e-18	0.491887	0.243	0.199	1.43845e-12	glud1a	0	Superficial_Epithelial_0dpa_vs_1dpa	DAR
chr18-21149173-21149740	7.15234e-18	-1.45658	0.04	0.117	1.47147e-12	chka	3798	Superficial_Epithelial_0dpa_vs_1dpa	DAR
chr25-16983157-16984653	8.10706e-18	-1.38522	0.052	0.148	1.66788e-12	ccnd2a	0	Superficial_Epithelial_0dpa_vs_1dpa	DAR
chr17-24324682-24325815	9.17126e-18	-1.34193	0.053	0.145	1.88682e-12	otx1	266	Superficial_Epithelial_0dpa_vs_1dpa	DAR
chr4-21575140-21576164	9.52564e-18	-0.939687	0.113	0.241	1.95973e-12	ppp1r12a	0	Superficial_Epithelial_0dpa_vs_1dpa	DAR
chr3-33096232-33097031	9.54908e-18	-1.6236	0.031	0.106	1.96455e-12	rarab	0	Superficial_Epithelial_0dpa_vs_1dpa	DAR
chr23-4391045-4392196	1.06045e-17	0.79619	0.122	0.081	2.18168e-12	zgc:171857	0	Superficial_Epithelial_0dpa_vs_1dpa	DAR
chr13-17757685-17758899	1.07414e-17	-1.10626	0.084	0.195	2.20986e-12	march8	0	Superficial_Epithelial_0dpa_vs_1dpa	DAR
chr12-34305241-34306555	1.09498e-17	-1.43813	0.039	0.116	2.25272e-12	CU855552.1	9942	Superficial_Epithelial_0dpa_vs_1dpa	DAR
chr13-36388751-36391872	1.138e-17	-1.98391	0.028	0.117	2.34123e-12	actn1	0	Superficial_Epithelial_0dpa_vs_1dpa	DAR
chr18-47427260-47428207	1.21748e-17	-1.68472	0.033	0.113	2.50474e-12	CABZ01112464.1	75569	Superficial_Epithelial_0dpa_vs_1dpa	DAR
chr14-20156219-20157193	1.23668e-17	-0.903776	0.134	0.281	2.54425e-12	fmr1	0	Superficial_Epithelial_0dpa_vs_1dpa	DAR
chr3-15216077-15217196	1.27822e-17	-1.68841	0.027	0.102	2.6297e-12	kctd13	0	Superficial_Epithelial_0dpa_vs_1dpa	DAR
chr2-36916643-36919222	1.29543e-17	-1.28065	0.062	0.158	2.66512e-12	map1sb	0	Superficial_Epithelial_0dpa_vs_1dpa	DAR
chr18-23160319-23161459	1.32092e-17	0.434038	0.29	0.263	2.71756e-12	AL953894.1	25668	Superficial_Epithelial_0dpa_vs_1dpa	DAR
chr15-28565466-28566627	1.32885e-17	-1.17945	0.078	0.197	2.73388e-12	ssh2a	0	Superficial_Epithelial_0dpa_vs_1dpa	DAR
chr6-58185510-58186588	1.34207e-17	0.734464	0.155	0.105	2.76106e-12	tox2	36344	Superficial_Epithelial_0dpa_vs_1dpa	DAR
chr20-24060130-24060627	1.37763e-17	-1.48369	0.043	0.13	2.83423e-12	bach2b	0	Superficial_Epithelial_0dpa_vs_1dpa	DAR
chr23-36560437-36561383	1.43122e-17	0.638138	0.173	0.128	2.94448e-12	spryd3	0	Superficial_Epithelial_0dpa_vs_1dpa	DAR
chr5-63104872-63105427	1.53455e-17	0.791161	0.123	0.08	3.15706e-12	usp2b	0	Superficial_Epithelial_0dpa_vs_1dpa	DAR
chr13-1184403-1184959	1.54435e-17	-1.27413	0.06	0.163	3.17722e-12	tnfaip3	0	Superficial_Epithelial_0dpa_vs_1dpa	DAR
chr8-32357778-32358714	1.58736e-17	0.539561	0.216	0.177	3.2657e-12	ipo11	3056	Superficial_Epithelial_0dpa_vs_1dpa	DAR
chr18-22257-23584	1.61007e-17	0.412343	0.34	0.312	3.31242e-12	pde8a	0	Superficial_Epithelial_0dpa_vs_1dpa	DAR
chr5-48872699-48873720	1.6245e-17	-1.03339	0.096	0.218	3.34212e-12	adgrv1	0	Superficial_Epithelial_0dpa_vs_1dpa	DAR
chr15-3042660-3043633	1.71009e-17	-1.57576	0.032	0.101	3.51821e-12	fndc3a	0	Superficial_Epithelial_0dpa_vs_1dpa	DAR
chr16-30689996-30694785	1.73867e-17	-1.4155	0.049	0.142	3.57699e-12	ldlrad4b	34015	Superficial_Epithelial_0dpa_vs_1dpa	DAR
chr16-8005155-8006046	1.78023e-17	-1.1767	0.066	0.168	3.66251e-12	ano10a	0	Superficial_Epithelial_0dpa_vs_1dpa	DAR
chr1-54106619-54107148	1.81076e-17	-1.68588	0.033	0.118	3.72531e-12	rfx1b	0	Superficial_Epithelial_0dpa_vs_1dpa	DAR
chr1-18737458-18738156	1.84277e-17	-1.24852	0.059	0.155	3.79116e-12	tbc1d1	0	Superficial_Epithelial_0dpa_vs_1dpa	DAR
chr16-42598977-42600204	1.97059e-17	-1.15723	0.064	0.156	4.05413e-12	dpy19l1l	67355	Superficial_Epithelial_0dpa_vs_1dpa	DAR
chr5-30561616-30563085	2.11233e-17	-0.80345	0.16	0.303	4.34574e-12	c2cd2l	0	Superficial_Epithelial_0dpa_vs_1dpa	DAR
chr3-51824908-51826131	2.17434e-17	-1.47349	0.039	0.118	4.47331e-12	baiap2a	0	Superficial_Epithelial_0dpa_vs_1dpa	DAR
chr24-25957565-25959140	2.27186e-17	-0.87481	0.122	0.25	4.67395e-12	map3k15	0	Superficial_Epithelial_0dpa_vs_1dpa	DAR
chr15-15888715-15889869	2.3044e-17	-1.73909	0.029	0.104	4.74088e-12	synrg	0	Superficial_Epithelial_0dpa_vs_1dpa	DAR
chr23-29988453-29989858	2.32452e-17	0.448032	0.232	0.211	4.78228e-12	dvl1a	0	Superficial_Epithelial_0dpa_vs_1dpa	DAR
chr1-58796502-58797316	2.34615e-17	-1.06948	0.095	0.227	4.82678e-12	CABZ01096573.1	30077	Superficial_Epithelial_0dpa_vs_1dpa	DAR
chr5-32056016-32058054	2.43335e-17	-1.30017	0.057	0.152	5.00618e-12	arpc5lb	2826	Superficial_Epithelial_0dpa_vs_1dpa	DAR
chr4-48338-49402	2.44128e-17	0.82879	0.123	0.079	5.02249e-12	CU856344.1	0	Superficial_Epithelial_0dpa_vs_1dpa	DAR
chr6-147728-148259	2.51382e-17	-1.3851	0.057	0.153	5.17174e-12	fdx2	1145	Superficial_Epithelial_0dpa_vs_1dpa	DAR
chr14-7083468-7084499	2.519e-17	-1.35718	0.056	0.154	5.18238e-12	hbegfa	31527	Superficial_Epithelial_0dpa_vs_1dpa	DAR
chr14-22040717-22042380	2.52737e-17	0.396321	0.336	0.318	5.1996e-12	ssrp1a	0	Superficial_Epithelial_0dpa_vs_1dpa	DAR
chr5-40291820-40292762	2.57487e-17	-1.60797	0.038	0.115	5.29734e-12	snx18a	0	Superficial_Epithelial_0dpa_vs_1dpa	DAR
chr5-58428251-58428908	2.78613e-17	-1.38131	0.043	0.121	5.73197e-12	ccdc15	0	Superficial_Epithelial_0dpa_vs_1dpa	DAR
chr23-27469876-27470873	2.79014e-17	-1.42175	0.045	0.132	5.74021e-12	atf7a	0	Superficial_Epithelial_0dpa_vs_1dpa	DAR
chr25-5915743-5918289	3.36052e-17	-1.08992	0.084	0.191	6.91367e-12	CABZ01067752.1	9881	Superficial_Epithelial_0dpa_vs_1dpa	DAR
chr18-18454424-18457131	3.63852e-17	-0.901907	0.145	0.3	7.4856e-12	siah1	0	Superficial_Epithelial_0dpa_vs_1dpa	DAR
chr18-20934981-20935791	3.65686e-17	0.638343	0.174	0.133	7.52332e-12	igf1ra	0	Superficial_Epithelial_0dpa_vs_1dpa	DAR
chr24-21771394-21772242	3.6681e-17	0.652811	0.159	0.116	7.54645e-12	flt1	0	Superficial_Epithelial_0dpa_vs_1dpa	DAR
chr12-37363631-37364698	3.70914e-17	-1.78295	0.028	0.105	7.63088e-12	tekt3	19772	Superficial_Epithelial_0dpa_vs_1dpa	DAR
chr10-7616182-7617826	3.89377e-17	0.6867	0.138	0.1	8.01072e-12	ppp2cb	0	Superficial_Epithelial_0dpa_vs_1dpa	DAR
chr1-44534119-44536163	4.39436e-17	-0.769515	0.169	0.324	9.04061e-12	zdhhc5a	0	Superficial_Epithelial_0dpa_vs_1dpa	DAR
chr19-8835723-8837039	4.52476e-17	0.470311	0.244	0.198	9.30888e-12	celf3a	0	Superficial_Epithelial_0dpa_vs_1dpa	DAR
chr21-23248116-23249445	4.67148e-17	0.58624	0.185	0.15	9.61073e-12	zbtb16a	0	Superficial_Epithelial_0dpa_vs_1dpa	DAR
chr7-25699616-25701204	4.89822e-17	-1.30794	0.05	0.131	1.00772e-11	CR846090.1	1238	Superficial_Epithelial_0dpa_vs_1dpa	DAR
chr16-8862229-8864073	6.77705e-17	-1.22537	0.065	0.175	1.39426e-11	triob	0	Superficial_Epithelial_0dpa_vs_1dpa	DAR
chr16-5404941-5405583	6.93614e-17	0.680372	0.123	0.095	1.42699e-11	plecb	0	Superficial_Epithelial_0dpa_vs_1dpa	DAR
chr12-20128509-20129573	6.93913e-17	-1.35029	0.054	0.148	1.4276e-11	mgrn1a	0	Superficial_Epithelial_0dpa_vs_1dpa	DAR
chr9-30423442-30425058	7.09283e-17	-1.06001	0.088	0.199	1.45922e-11	zgc:113314	0	Superficial_Epithelial_0dpa_vs_1dpa	DAR
chr3-8092395-8093049	7.11292e-17	0.863802	0.115	0.07	1.46336e-11	BX927317.3	961	Superficial_Epithelial_0dpa_vs_1dpa	DAR
chr14-15129863-15131871	7.1321e-17	0.532499	0.214	0.168	1.4673e-11	uvssa	0	Superficial_Epithelial_0dpa_vs_1dpa	DAR
chr20-46551571-46552225	7.18632e-17	0.832077	0.113	0.074	1.47846e-11	si:ch211-153j24.3	0	Superficial_Epithelial_0dpa_vs_1dpa	DAR
chr6-60101718-60102193	7.56583e-17	-1.16171	0.074	0.179	1.55653e-11	pmepa1	0	Superficial_Epithelial_0dpa_vs_1dpa	DAR
chr3-14143597-14144606	7.62752e-17	0.750917	0.117	0.081	1.56922e-11	si:ch211-108d22.2	12483	Superficial_Epithelial_0dpa_vs_1dpa	DAR
chr21-43445278-43446974	7.80775e-17	-1.22891	0.067	0.176	1.6063e-11	stk26	0	Superficial_Epithelial_0dpa_vs_1dpa	DAR
chr10-7007278-7008173	8.02725e-17	-1.37764	0.045	0.125	1.65146e-11	CABZ01061993.1	1200	Superficial_Epithelial_0dpa_vs_1dpa	DAR
chr19-31338926-31339440	8.16878e-17	-1.57624	0.035	0.109	1.68058e-11	arl4ab	0	Superficial_Epithelial_0dpa_vs_1dpa	DAR
chr18-36643139-36644390	8.28328e-17	-1.31056	0.056	0.153	1.70414e-11	znf296	0	Superficial_Epithelial_0dpa_vs_1dpa	DAR
chr24-20070227-20071418	8.28624e-17	-1.15937	0.071	0.176	1.70474e-11	CR381686.2	0	Superficial_Epithelial_0dpa_vs_1dpa	DAR
chr11-34269226-34270428	8.40272e-17	0.439473	0.275	0.237	1.72871e-11	FO681390.1	14005	Superficial_Epithelial_0dpa_vs_1dpa	DAR
chr2-35681907-35682580	8.54571e-17	0.806197	0.136	0.086	1.75813e-11	ankrd45	0	Superficial_Epithelial_0dpa_vs_1dpa	DAR
chr4-1566442-1567427	8.72233e-17	-1.65584	0.033	0.114	1.79446e-11	slc38a4	0	Superficial_Epithelial_0dpa_vs_1dpa	DAR
chr12-34927622-34928859	8.89825e-17	0.408974	0.266	0.248	1.83065e-11	qki2	24178	Superficial_Epithelial_0dpa_vs_1dpa	DAR
chr16-546846-547600	9.06321e-17	0.799727	0.118	0.075	1.86459e-11	irx2a	8145	Superficial_Epithelial_0dpa_vs_1dpa	DAR
chr16-39584365-39585491	9.36722e-17	-1.25848	0.065	0.17	1.92714e-11	tgfbr2b	0	Superficial_Epithelial_0dpa_vs_1dpa	DAR
chr14-26166262-26168349	9.69513e-17	-0.96868	0.131	0.275	1.9946e-11	CR376800.1	0	Superficial_Epithelial_0dpa_vs_1dpa	DAR
chr22-3296982-3297556	9.82872e-17	0.821015	0.114	0.072	2.02208e-11	si:zfos-943e10.1	0	Superficial_Epithelial_0dpa_vs_1dpa	DAR
chr18-50671515-50673146	9.8551e-17	0.766734	0.103	0.071	2.02751e-11	zgc:158464	0	Superficial_Epithelial_0dpa_vs_1dpa	DAR
chr12-31654304-31656339	1.04471e-16	-1.45771	0.042	0.134	2.14931e-11	dnmbp	0	Superficial_Epithelial_0dpa_vs_1dpa	DAR
chr22-15861419-15862288	1.06784e-16	-1.4187	0.049	0.145	2.19689e-11	klf2a	35932	Superficial_Epithelial_0dpa_vs_1dpa	DAR
chr9-9148541-9149208	1.10006e-16	0.833422	0.123	0.077	2.26318e-11	sik1	25978	Superficial_Epithelial_0dpa_vs_1dpa	DAR
chr23-29729972-29731626	1.15072e-16	-1.41228	0.042	0.125	2.36741e-11	ctnnbip1	0	Superficial_Epithelial_0dpa_vs_1dpa	DAR
chr11-6489874-6491648	1.20131e-16	-1.24422	0.066	0.174	2.47148e-11	CU062501.2	0	Superficial_Epithelial_0dpa_vs_1dpa	DAR
chr1-53229652-53230954	1.23408e-16	-1.14615	0.07	0.164	2.53891e-11	BX957281.1	0	Superficial_Epithelial_0dpa_vs_1dpa	DAR
chr24-17070832-17071541	1.2551e-16	-1.54364	0.031	0.101	2.58215e-11	pip4k2aa	0	Superficial_Epithelial_0dpa_vs_1dpa	DAR
chr16-28271223-28271763	1.29338e-16	-0.852546	0.131	0.253	2.66089e-11	mindy3	0	Superficial_Epithelial_0dpa_vs_1dpa	DAR
chr15-2478523-2479758	1.37409e-16	-1.41742	0.046	0.137	2.82695e-11	panx1a	0	Superficial_Epithelial_0dpa_vs_1dpa	DAR
chr16-45408513-45409887	1.38829e-16	0.89213	0.101	0.06	2.85615e-11	rgl2	10104	Superficial_Epithelial_0dpa_vs_1dpa	DAR
chr16-38309574-38311188	1.39415e-16	-1.36018	0.048	0.138	2.8682e-11	cdc42se1	698	Superficial_Epithelial_0dpa_vs_1dpa	DAR
chr23-27390178-27390715	1.40296e-16	-1.09074	0.077	0.184	2.88633e-11	dip2ba	0	Superficial_Epithelial_0dpa_vs_1dpa	DAR
chr23-2657178-2659028	1.47292e-16	-1.77801	0.028	0.103	3.03027e-11	GGT7	0	Superficial_Epithelial_0dpa_vs_1dpa	DAR
chr4-25026107-25027803	1.48208e-16	-0.798842	0.162	0.311	3.04911e-11	gata3	26706	Superficial_Epithelial_0dpa_vs_1dpa	DAR
chr11-25845266-25847072	1.61131e-16	-1.249	0.066	0.174	3.31499e-11	tmem51b	0	Superficial_Epithelial_0dpa_vs_1dpa	DAR
chr8-19589839-19591412	1.6257e-16	-1.83473	0.027	0.101	3.34459e-11	notch2	0	Superficial_Epithelial_0dpa_vs_1dpa	DAR
chr12-34715945-34717220	1.64801e-16	0.424114	0.267	0.256	3.39048e-11	bahcc1b	0	Superficial_Epithelial_0dpa_vs_1dpa	DAR
chr9-9709315-9710364	1.65056e-16	-0.983694	0.105	0.232	3.39573e-11	gpr156	3802	Superficial_Epithelial_0dpa_vs_1dpa	DAR
chr19-17542029-17542825	1.66552e-16	-1.4026	0.045	0.132	3.42652e-11	thrb	0	Superficial_Epithelial_0dpa_vs_1dpa	DAR
chr6-40160727-40161465	1.77966e-16	0.780289	0.101	0.067	3.66133e-11	ip6k2b	0	Superficial_Epithelial_0dpa_vs_1dpa	DAR
chr24-9290529-9290897	1.83949e-16	-1.58223	0.03	0.101	3.78442e-11	tgif1	0	Superficial_Epithelial_0dpa_vs_1dpa	DAR
chr25-24616333-24617075	1.84692e-16	-0.998555	0.099	0.22	3.79971e-11	abtb2b	0	Superficial_Epithelial_0dpa_vs_1dpa	DAR
chr14-41446277-41447752	1.85654e-16	0.515167	0.168	0.145	3.8195e-11	bcorl1	6785	Superficial_Epithelial_0dpa_vs_1dpa	DAR
chr14-569369-570657	1.96694e-16	-1.70807	0.032	0.114	4.04663e-11	fgf2	0	Superficial_Epithelial_0dpa_vs_1dpa	DAR
chr12-27551120-27551969	1.98091e-16	-1.57758	0.031	0.1	4.07537e-11	AL833789.1	0	Superficial_Epithelial_0dpa_vs_1dpa	DAR
chr2-45683470-45684602	1.9873e-16	0.448147	0.27	0.253	4.08851e-11	fam102ba	0	Superficial_Epithelial_0dpa_vs_1dpa	DAR
chr20-33194478-33196057	1.99012e-16	-1.69791	0.033	0.107	4.09432e-11	ddx1	4825	Superficial_Epithelial_0dpa_vs_1dpa	DAR
chr5-14403652-14404410	1.99308e-16	-0.871776	0.126	0.252	4.10041e-11	kat6a	0	Superficial_Epithelial_0dpa_vs_1dpa	DAR
chr16-41537433-41538366	2.02984e-16	-1.42734	0.045	0.135	4.17602e-11	rpp25l	1719	Superficial_Epithelial_0dpa_vs_1dpa	DAR
chr16-29996478-29997541	2.03178e-16	-1.35385	0.043	0.118	4.18003e-11	sema6e	5063	Superficial_Epithelial_0dpa_vs_1dpa	DAR
chr2-22845821-22847245	2.08311e-16	-1.0159	0.11	0.248	4.28563e-11	aire	0	Superficial_Epithelial_0dpa_vs_1dpa	DAR
chr3-58441244-58442290	2.23601e-16	-0.820045	0.159	0.304	4.60019e-11	cdr2a	0	Superficial_Epithelial_0dpa_vs_1dpa	DAR
chr2-37348376-37349442	2.24544e-16	-0.894597	0.128	0.257	4.6196e-11	skila	0	Superficial_Epithelial_0dpa_vs_1dpa	DAR
chr24-29883783-29884975	2.30017e-16	-1.15898	0.069	0.162	4.73218e-11	LO018627.1	10273	Superficial_Epithelial_0dpa_vs_1dpa	DAR
chr17-27072356-27073265	2.4449e-16	-1.29329	0.055	0.148	5.02994e-11	rps6ka1	0	Superficial_Epithelial_0dpa_vs_1dpa	DAR
chr3-26016923-26017829	2.50839e-16	-1.23306	0.066	0.167	5.16056e-11	hmox1a	0	Superficial_Epithelial_0dpa_vs_1dpa	DAR
chr3-35964380-35965204	2.54952e-16	-1.1801	0.074	0.188	5.24518e-11	dre-mir-365-2	3293	Superficial_Epithelial_0dpa_vs_1dpa	DAR
chr19-12508604-12509817	2.65526e-16	-1.00991	0.095	0.214	5.46272e-11	ldlrad4a	0	Superficial_Epithelial_0dpa_vs_1dpa	DAR
chr7-34163039-34164467	2.66131e-16	-1.24249	0.07	0.179	5.47516e-11	smad3a	13775	Superficial_Epithelial_0dpa_vs_1dpa	DAR
chr6-41659617-41661006	2.68329e-16	0.709298	0.117	0.081	5.52039e-11	srgap3	0	Superficial_Epithelial_0dpa_vs_1dpa	DAR
chr7-6840173-6840981	2.68713e-16	-1.43031	0.051	0.143	5.52829e-11	prkd4	38552	Superficial_Epithelial_0dpa_vs_1dpa	DAR
chr20-24101264-24101862	2.73617e-16	-1.03237	0.088	0.2	5.62918e-11	bach2b	0	Superficial_Epithelial_0dpa_vs_1dpa	DAR
chr8-25959146-25960520	2.75448e-16	-0.780676	0.169	0.322	5.66684e-11	si:dkey-72l14.4	0	Superficial_Epithelial_0dpa_vs_1dpa	DAR
chr7-30189615-30190562	2.81822e-16	0.394422	0.299	0.285	5.79798e-11	dre-mir-184-2	0	Superficial_Epithelial_0dpa_vs_1dpa	DAR
chr23-21543666-21545318	2.88095e-16	-1.44112	0.052	0.145	5.92703e-11	arhgef10lb	0	Superficial_Epithelial_0dpa_vs_1dpa	DAR
chr4-9171143-9171838	2.93941e-16	-1.3938	0.045	0.13	6.04731e-11	chst11	0	Superficial_Epithelial_0dpa_vs_1dpa	DAR
chr9-27295621-27296582	2.95613e-16	0.581164	0.183	0.142	6.0817e-11	BX928746.1	13184	Superficial_Epithelial_0dpa_vs_1dpa	DAR
chr20-30818520-30819375	3.13339e-16	-1.39474	0.05	0.144	6.44639e-11	nhsl1b	0	Superficial_Epithelial_0dpa_vs_1dpa	DAR
chr16-17340294-17341168	3.18133e-16	-1.42232	0.042	0.124	6.545e-11	zyx	0	Superficial_Epithelial_0dpa_vs_1dpa	DAR
chr1-45791071-45792436	3.279e-16	-1.4272	0.045	0.133	6.74595e-11	pkn1a	0	Superficial_Epithelial_0dpa_vs_1dpa	DAR
chr12-25727595-25728972	3.34109e-16	0.496618	0.201	0.166	6.87368e-11	prkcea	0	Superficial_Epithelial_0dpa_vs_1dpa	DAR
chr22-16499695-16500123	3.48623e-16	-1.08571	0.083	0.188	7.17228e-11	ier5	541	Superficial_Epithelial_0dpa_vs_1dpa	DAR
chr24-10360876-10362219	3.66899e-16	-1.51989	0.037	0.114	7.54829e-11	ankha	0	Superficial_Epithelial_0dpa_vs_1dpa	DAR
chr23-21384470-21385812	3.90878e-16	0.582853	0.144	0.114	8.04161e-11	iffo2a	0	Superficial_Epithelial_0dpa_vs_1dpa	DAR
chr24-14381862-14383115	3.97855e-16	-1.45605	0.037	0.107	8.18515e-11	ncoa2	0	Superficial_Epithelial_0dpa_vs_1dpa	DAR
chr17-20897150-20898274	3.99125e-16	0.682131	0.135	0.098	8.21128e-11	ank3a	0	Superficial_Epithelial_0dpa_vs_1dpa	DAR
chr18-40831405-40833172	4.24499e-16	-0.903888	0.126	0.267	8.7333e-11	vaspb	0	Superficial_Epithelial_0dpa_vs_1dpa	DAR
chr23-25909505-25910883	4.25433e-16	0.869905	0.101	0.061	8.75252e-11	pkig	0	Superficial_Epithelial_0dpa_vs_1dpa	DAR
chr16-40946038-40946747	4.32857e-16	-1.40909	0.043	0.131	8.90525e-11	gbp	7733	Superficial_Epithelial_0dpa_vs_1dpa	DAR
chr10-35071386-35072643	4.37861e-16	-1.84172	0.03	0.108	9.0082e-11	C10H21orf91	0	Superficial_Epithelial_0dpa_vs_1dpa	DAR
chr5-5086152-5086788	4.42574e-16	-1.59042	0.037	0.116	9.10517e-11	lmx1ba	0	Superficial_Epithelial_0dpa_vs_1dpa	DAR
chr17-1091903-1092421	4.51877e-16	-1.69142	0.032	0.105	9.29656e-11	dnajc17	0	Superficial_Epithelial_0dpa_vs_1dpa	DAR
chr4-14540905-14541794	4.64912e-16	-1.13277	0.074	0.182	9.56472e-11	plxnb2a	0	Superficial_Epithelial_0dpa_vs_1dpa	DAR
chr5-29870126-29871605	4.69256e-16	-1.13363	0.073	0.176	9.65409e-11	ubash3ba	0	Superficial_Epithelial_0dpa_vs_1dpa	DAR
chr3-18022920-18023909	4.89301e-16	0.476172	0.208	0.173	1.00665e-10	si:ch73-141c7.1	65	Superficial_Epithelial_0dpa_vs_1dpa	DAR
chr6-58655850-58656784	5.03085e-16	-1.06408	0.08	0.179	1.03501e-10	sp7	0	Superficial_Epithelial_0dpa_vs_1dpa	DAR
chr14-24409815-24410975	5.05524e-16	-1.71173	0.029	0.102	1.04002e-10	cxcl14	0	Superficial_Epithelial_0dpa_vs_1dpa	DAR
chr24-24272466-24273061	5.06625e-16	-1.19483	0.066	0.163	1.04229e-10	pdha1b	309	Superficial_Epithelial_0dpa_vs_1dpa	DAR
chr5-37664191-37665936	5.17346e-16	-1.13583	0.074	0.176	1.06435e-10	sptbn2	0	Superficial_Epithelial_0dpa_vs_1dpa	DAR
chr21-22945961-22947367	5.34397e-16	-0.735675	0.161	0.311	1.09943e-10	dub	0	Superficial_Epithelial_0dpa_vs_1dpa	DAR
chr8-32402821-32404672	5.51453e-16	0.585104	0.15	0.12	1.13452e-10	epgn	0	Superficial_Epithelial_0dpa_vs_1dpa	DAR
chr18-20868104-20869929	5.72057e-16	0.415778	0.231	0.22	1.1769e-10	pgpep1l	0	Superficial_Epithelial_0dpa_vs_1dpa	DAR
chr21-3272964-3273579	5.78193e-16	0.787433	0.115	0.078	1.18953e-10	ctif	0	Superficial_Epithelial_0dpa_vs_1dpa	DAR
chr7-6842138-6842862	5.8248e-16	-1.07348	0.089	0.202	1.19835e-10	prkd4	36671	Superficial_Epithelial_0dpa_vs_1dpa	DAR
chr3-57500783-57501740	5.92868e-16	-1.36738	0.042	0.123	1.21972e-10	cyth1a	0	Superficial_Epithelial_0dpa_vs_1dpa	DAR
chr16-22719753-22720628	6.02952e-16	0.388082	0.266	0.248	1.24046e-10	tlr19	1723	Superficial_Epithelial_0dpa_vs_1dpa	DAR
chr17-35339880-35341532	6.05755e-16	-1.54244	0.043	0.131	1.24623e-10	rnf144aa	0	Superficial_Epithelial_0dpa_vs_1dpa	DAR
chr1-8653391-8656525	6.06663e-16	0.256375	0.513	0.531	1.2481e-10	actb1	5	Superficial_Epithelial_0dpa_vs_1dpa	DAR
chr12-37461588-37462732	6.09801e-16	-1.23923	0.058	0.152	1.25456e-10	sdk2b	780	Superficial_Epithelial_0dpa_vs_1dpa	DAR
chr14-21295010-21296188	6.19986e-16	0.488443	0.203	0.185	1.27551e-10	egr1	36333	Superficial_Epithelial_0dpa_vs_1dpa	DAR
chr1-44923631-44924607	6.28656e-16	-1.28124	0.051	0.137	1.29335e-10	wu:fc21g02	0	Superficial_Epithelial_0dpa_vs_1dpa	DAR
chr16-77682-78387	6.53862e-16	-1.63869	0.032	0.109	1.3452e-10	sox4b	6573	Superficial_Epithelial_0dpa_vs_1dpa	DAR
chr20-34076081-34076990	6.57979e-16	-1.04042	0.078	0.174	1.35367e-10	tprb	6124	Superficial_Epithelial_0dpa_vs_1dpa	DAR
chr7-28656997-28658525	6.6212e-16	0.297342	0.414	0.408	1.36219e-10	adgrg1	0	Superficial_Epithelial_0dpa_vs_1dpa	DAR
chr11-13118970-13120215	6.8143e-16	-1.43669	0.041	0.116	1.40192e-10	elovl1b	0	Superficial_Epithelial_0dpa_vs_1dpa	DAR
chr12-35497000-35498075	6.8909e-16	0.458487	0.212	0.187	1.41768e-10	camk2g1	0	Superficial_Epithelial_0dpa_vs_1dpa	DAR
chr2-27437270-27438284	6.95424e-16	0.497117	0.221	0.18	1.43071e-10	elovl8a	27563	Superficial_Epithelial_0dpa_vs_1dpa	DAR
chr7-23677022-23678006	6.99965e-16	-1.1033	0.08	0.184	1.44005e-10	si:dkey-172j4.3	0	Superficial_Epithelial_0dpa_vs_1dpa	DAR
chr13-10088678-10089826	7.21172e-16	-1.29529	0.054	0.142	1.48368e-10	BX248322.1	0	Superficial_Epithelial_0dpa_vs_1dpa	DAR
chr19-15180456-15181378	7.67075e-16	-0.80562	0.154	0.293	1.57812e-10	phactr4a	0	Superficial_Epithelial_0dpa_vs_1dpa	DAR
chr20-28717073-28718426	7.71683e-16	-1.59978	0.031	0.112	1.5876e-10	sipa1l1	0	Superficial_Epithelial_0dpa_vs_1dpa	DAR
chr3-17679837-17681516	7.95627e-16	-1.45004	0.041	0.125	1.63686e-10	kat2a	0	Superficial_Epithelial_0dpa_vs_1dpa	DAR
chr13-31645276-31647290	8.16366e-16	0.389662	0.292	0.267	1.67953e-10	six4a	0	Superficial_Epithelial_0dpa_vs_1dpa	DAR
chr8-26341189-26342021	8.50668e-16	-1.29033	0.05	0.125	1.7501e-10	prkar2aa	0	Superficial_Epithelial_0dpa_vs_1dpa	DAR
chr20-13269614-13270585	8.61986e-16	0.803358	0.114	0.075	1.77338e-10	ppp2r5a	0	Superficial_Epithelial_0dpa_vs_1dpa	DAR
chr24-2944420-2944867	8.97717e-16	-1.26737	0.049	0.129	1.84689e-10	tubb6	0	Superficial_Epithelial_0dpa_vs_1dpa	DAR
chr5-35197344-35198204	9.25495e-16	-0.930901	0.12	0.258	1.90404e-10	fcho2	0	Superficial_Epithelial_0dpa_vs_1dpa	DAR
chr17-38475768-38478129	9.40932e-16	-1.13416	0.082	0.196	1.9358e-10	stard9	0	Superficial_Epithelial_0dpa_vs_1dpa	DAR
chr14-450635-451991	9.4898e-16	-1.29091	0.052	0.144	1.95236e-10	FAT4	0	Superficial_Epithelial_0dpa_vs_1dpa	DAR
chr8-20214746-20216093	9.53087e-16	-0.906931	0.118	0.253	1.9608e-10	mllt1a	0	Superficial_Epithelial_0dpa_vs_1dpa	DAR
chr7-62408517-62409434	9.63703e-16	-1.32489	0.045	0.126	1.98264e-10	stim2b	0	Superficial_Epithelial_0dpa_vs_1dpa	DAR
chr24-32436908-32438655	1.00127e-15	-1.73067	0.031	0.104	2.05994e-10	neurod6a	0	Superficial_Epithelial_0dpa_vs_1dpa	DAR
chr1-34661031-34661950	1.02265e-15	0.479314	0.229	0.191	2.10391e-10	pibf1	0	Superficial_Epithelial_0dpa_vs_1dpa	DAR
chr7-5482144-5482980	1.02666e-15	-1.02856	0.087	0.2	2.11217e-10	arhgef11	0	Superficial_Epithelial_0dpa_vs_1dpa	DAR
chr25-943868-944797	1.03691e-15	-1.41722	0.05	0.145	2.13327e-10	znf609a	0	Superficial_Epithelial_0dpa_vs_1dpa	DAR
chr17-14894832-14895953	1.04047e-15	-1.27718	0.058	0.147	2.14059e-10	ptger2a	687	Superficial_Epithelial_0dpa_vs_1dpa	DAR
chr4-3077857-3079214	1.11779e-15	-1.50046	0.044	0.126	2.29964e-10	plekha5	0	Superficial_Epithelial_0dpa_vs_1dpa	DAR
chr8-31727201-31727925	1.20813e-15	-1.1661	0.06	0.149	2.48552e-10	oxct1a	0	Superficial_Epithelial_0dpa_vs_1dpa	DAR
chr16-55066862-55067746	1.23821e-15	-1.57663	0.033	0.105	2.5474e-10	LO017815.1	0	Superficial_Epithelial_0dpa_vs_1dpa	DAR
chr6-18959434-18960838	1.2588e-15	-1.74	0.032	0.109	2.58975e-10	sept9b	0	Superficial_Epithelial_0dpa_vs_1dpa	DAR
chr14-40770873-40772168	1.26535e-15	-1.00601	0.092	0.2	2.60324e-10	elf1	0	Superficial_Epithelial_0dpa_vs_1dpa	DAR
chr9-8594824-8595935	1.35229e-15	0.436462	0.247	0.215	2.78209e-10	col4a1	38293	Superficial_Epithelial_0dpa_vs_1dpa	DAR
chr6-30865825-30866589	1.39731e-15	-1.11149	0.078	0.188	2.87471e-10	pde4ba	0	Superficial_Epithelial_0dpa_vs_1dpa	DAR
chr20-9602813-9604349	1.45701e-15	-1.243	0.06	0.161	2.99753e-10	zfp36l1b	22366	Superficial_Epithelial_0dpa_vs_1dpa	DAR
chr7-34143668-34145236	1.47903e-15	-1.24997	0.065	0.173	3.04284e-10	smad3a	0	Superficial_Epithelial_0dpa_vs_1dpa	DAR
chr5-24081711-24082868	1.48098e-15	-1.55245	0.039	0.121	3.04684e-10	tp53	3358	Superficial_Epithelial_0dpa_vs_1dpa	DAR
chr2-3826018-3826701	1.48714e-15	-1.38835	0.048	0.132	3.05952e-10	npc1	0	Superficial_Epithelial_0dpa_vs_1dpa	DAR
chr1-49557906-49558676	1.53389e-15	-1.43241	0.04	0.115	3.15569e-10	si:ch211-281g13.4	0	Superficial_Epithelial_0dpa_vs_1dpa	DAR
chr17-28012625-28014208	1.55542e-15	-1.02663	0.094	0.21	3.2e-10	luzp1	0	Superficial_Epithelial_0dpa_vs_1dpa	DAR
chr8-20947550-20948645	1.78505e-15	-1.26257	0.053	0.139	3.67242e-10	si:dkeyp-82a1.1	1698	Superficial_Epithelial_0dpa_vs_1dpa	DAR
chr5-22028468-22029111	1.78806e-15	0.742703	0.106	0.076	3.67861e-10	mtmr8	0	Superficial_Epithelial_0dpa_vs_1dpa	DAR
chr15-24915090-24917472	1.88754e-15	-0.856092	0.138	0.277	3.88326e-10	dre-mir-22a	6610	Superficial_Epithelial_0dpa_vs_1dpa	DAR
chr7-59412224-59413513	1.90969e-15	0.631989	0.149	0.106	3.92884e-10	SEMA4F	0	Superficial_Epithelial_0dpa_vs_1dpa	DAR
chr18-25176001-25177502	2.03459e-15	-0.920228	0.113	0.238	4.18581e-10	slco3a1	0	Superficial_Epithelial_0dpa_vs_1dpa	DAR
chr24-34166605-34167341	2.04116e-15	-1.12253	0.071	0.173	4.19932e-10	agap3	0	Superficial_Epithelial_0dpa_vs_1dpa	DAR
chr3-43726889-43728086	2.05288e-15	-1.2918	0.051	0.143	4.22344e-10	CU138533.1	0	Superficial_Epithelial_0dpa_vs_1dpa	DAR
chr4-9058737-9059373	2.15217e-15	-1.33739	0.056	0.155	4.4277e-10	slc41a2b	0	Superficial_Epithelial_0dpa_vs_1dpa	DAR
chr23-20118012-20119001	2.2143e-15	0.664476	0.119	0.082	4.55552e-10	tktb	0	Superficial_Epithelial_0dpa_vs_1dpa	DAR
chr17-25537594-25538289	2.22805e-15	0.622481	0.139	0.108	4.58381e-10	crybg1a	0	Superficial_Epithelial_0dpa_vs_1dpa	DAR
chr23-20844013-20845960	2.28485e-15	-1.06637	0.089	0.202	4.70067e-10	pax7b	17184	Superficial_Epithelial_0dpa_vs_1dpa	DAR
chr20-51417818-51418850	2.32541e-15	-1.5855	0.029	0.1	4.78412e-10	CU660013.1	8815	Superficial_Epithelial_0dpa_vs_1dpa	DAR
chr8-43567272-43569293	2.36501e-15	-1.09072	0.076	0.181	4.86559e-10	ncor2	0	Superficial_Epithelial_0dpa_vs_1dpa	DAR
chr17-22618900-22621473	2.39182e-15	-1.32161	0.048	0.133	4.92073e-10	birc6	0	Superficial_Epithelial_0dpa_vs_1dpa	DAR
chr8-43758864-43759712	2.40123e-15	-1.32629	0.044	0.12	4.94009e-10	ulk1a	0	Superficial_Epithelial_0dpa_vs_1dpa	DAR
chr17-45427510-45428488	2.52949e-15	-1.01766	0.095	0.214	5.20397e-10	ezra	0	Superficial_Epithelial_0dpa_vs_1dpa	DAR
chr10-2585446-2586165	2.76587e-15	-1.4175	0.038	0.109	5.69028e-10	CU856539.3	0	Superficial_Epithelial_0dpa_vs_1dpa	DAR
chr24-3389230-3390437	2.78115e-15	-0.547646	0.276	0.448	5.72171e-10	nck1b	0	Superficial_Epithelial_0dpa_vs_1dpa	DAR
chr20-28653027-28653922	2.79747e-15	0.585208	0.158	0.119	5.7553e-10	sipa1l1	0	Superficial_Epithelial_0dpa_vs_1dpa	DAR
chr22-24332605-24334348	2.89825e-15	-1.45126	0.037	0.113	5.96263e-10	ccdc50	0	Superficial_Epithelial_0dpa_vs_1dpa	DAR
chr10-403818-406475	2.9214e-15	-1.27923	0.058	0.164	6.01026e-10	dact3a	0	Superficial_Epithelial_0dpa_vs_1dpa	DAR
chr24-20142912-20144519	2.97334e-15	-1.53885	0.037	0.115	6.11712e-10	oxsr1b	0	Superficial_Epithelial_0dpa_vs_1dpa	DAR
chr18-46645157-46646084	3.05654e-15	-1.4565	0.039	0.122	6.28828e-10	pid1	0	Superficial_Epithelial_0dpa_vs_1dpa	DAR
chr7-37313429-37314153	3.14191e-15	-1.56718	0.034	0.109	6.46391e-10	sall1a	44850	Superficial_Epithelial_0dpa_vs_1dpa	DAR
chr16-27279954-27280863	3.34383e-15	0.825371	0.11	0.07	6.87933e-10	sec61b	48294	Superficial_Epithelial_0dpa_vs_1dpa	DAR
chr20-34359540-34360772	3.41647e-15	-0.978854	0.107	0.227	7.02877e-10	swt1	0	Superficial_Epithelial_0dpa_vs_1dpa	DAR
chr25-2390951-2391712	3.62067e-15	-1.24541	0.063	0.164	7.44887e-10	kcnq1.2	0	Superficial_Epithelial_0dpa_vs_1dpa	DAR
chr5-43439675-43440940	3.69224e-15	0.371547	0.275	0.252	7.59612e-10	rhobtb4	0	Superficial_Epithelial_0dpa_vs_1dpa	DAR
chr9-26212003-26212722	3.82381e-15	-0.957335	0.101	0.219	7.8668e-10	si:dkey-111i23.1	0	Superficial_Epithelial_0dpa_vs_1dpa	DAR
chr7-20879619-20880485	4.0353e-15	0.448751	0.202	0.176	8.30191e-10	gigyf1a	0	Superficial_Epithelial_0dpa_vs_1dpa	DAR
chr2-25053-26634	4.05417e-15	0.560997	0.133	0.113	8.34072e-10	CABZ01092282.1	2517	Superficial_Epithelial_0dpa_vs_1dpa	DAR
chr20-22577367-22578705	4.12043e-15	-1.69607	0.036	0.118	8.47704e-10	lnx1	87842	Superficial_Epithelial_0dpa_vs_1dpa	DAR
chr7-20571995-20572678	4.21471e-15	0.697608	0.121	0.087	8.67102e-10	si:dkey-19b23.10	0	Superficial_Epithelial_0dpa_vs_1dpa	DAR
chr6-53287410-53288508	4.33657e-15	0.516555	0.166	0.139	8.92171e-10	cysltr3	0	Superficial_Epithelial_0dpa_vs_1dpa	DAR
chr11-1880882-1881784	4.55776e-15	-1.57849	0.036	0.114	9.37678e-10	rbms2a	0	Superficial_Epithelial_0dpa_vs_1dpa	DAR
chr11-10890716-10891843	4.5949e-15	-0.752582	0.156	0.301	9.45317e-10	rbms1a	17339	Superficial_Epithelial_0dpa_vs_1dpa	DAR
chr10-40856225-40857482	4.73031e-15	-1.62425	0.03	0.1	9.73176e-10	bmp1b	0	Superficial_Epithelial_0dpa_vs_1dpa	DAR
chr4-11618189-11618810	5.03645e-15	-1.16963	0.069	0.175	1.03616e-09	BX465862.4	0	Superficial_Epithelial_0dpa_vs_1dpa	DAR
chr10-36782067-36782724	5.09267e-15	0.689571	0.127	0.089	1.04773e-09	dhrs13a.2	2031	Superficial_Epithelial_0dpa_vs_1dpa	DAR
chr7-72265437-72266558	5.25865e-15	-0.915828	0.117	0.246	1.08187e-09	CU463038.2	540	Superficial_Epithelial_0dpa_vs_1dpa	DAR
chr20-39784411-39784793	5.30605e-15	-1.49332	0.035	0.115	1.09162e-09	rnf217	0	Superficial_Epithelial_0dpa_vs_1dpa	DAR
chr23-6603378-6604314	5.48229e-15	-1.5315	0.034	0.103	1.12788e-09	rbm38	0	Superficial_Epithelial_0dpa_vs_1dpa	DAR
chr19-3438480-3439055	5.73159e-15	-1.25115	0.059	0.153	1.17917e-09	hivep1	0	Superficial_Epithelial_0dpa_vs_1dpa	DAR
chr19-42010391-42011356	5.77555e-15	-1.50314	0.037	0.111	1.18822e-09	trioa	0	Superficial_Epithelial_0dpa_vs_1dpa	DAR
chr3-53042227-53043295	5.90861e-15	-1.7183	0.027	0.101	1.21559e-09	pbx4	0	Superficial_Epithelial_0dpa_vs_1dpa	DAR
chr17-37533178-37533997	6.38999e-15	0.534555	0.159	0.133	1.31462e-09	mta1	0	Superficial_Epithelial_0dpa_vs_1dpa	DAR
chr19-34986907-34988098	6.5472e-15	-1.49923	0.033	0.104	1.34697e-09	si:rp71-45k5.2	6334	Superficial_Epithelial_0dpa_vs_1dpa	DAR
chr19-1709137-1712778	6.73051e-15	-0.798644	0.153	0.295	1.38468e-09	dennd3a	0	Superficial_Epithelial_0dpa_vs_1dpa	DAR
chr21-30122335-30123313	6.74182e-15	0.550845	0.175	0.129	1.38701e-09	pfdn1	0	Superficial_Epithelial_0dpa_vs_1dpa	DAR
chr17-32400801-32401829	7.49462e-15	0.591825	0.143	0.114	1.54188e-09	grhl1	0	Superficial_Epithelial_0dpa_vs_1dpa	DAR
chr2-16585331-16586558	7.54088e-15	-0.902019	0.109	0.216	1.5514e-09	si:dkeyp-13a3.10	0	Superficial_Epithelial_0dpa_vs_1dpa	DAR
chr13-304630-304929	7.99072e-15	-1.1377	0.065	0.153	1.64395e-09	chs1	1492	Superficial_Epithelial_0dpa_vs_1dpa	DAR
chr10-41158929-41160255	8.18537e-15	-1.17547	0.072	0.182	1.68399e-09	anxa4	0	Superficial_Epithelial_0dpa_vs_1dpa	DAR
chr16-7439316-7440173	8.22883e-15	-1.41638	0.038	0.116	1.69293e-09	prdm1a	0	Superficial_Epithelial_0dpa_vs_1dpa	DAR
chr23-3763466-3763798	8.75827e-15	-1.15971	0.05	0.126	1.80186e-09	hmga1a	3773	Superficial_Epithelial_0dpa_vs_1dpa	DAR
chr18-12335699-12336422	8.83735e-15	-1.28229	0.052	0.135	1.81813e-09	fam107b	8220	Superficial_Epithelial_0dpa_vs_1dpa	DAR
chr6-18120879-18122494	8.88368e-15	-1.49753	0.035	0.102	1.82766e-09	SEC14L1	0	Superficial_Epithelial_0dpa_vs_1dpa	DAR
chr9-8449901-8450362	8.9534e-15	-1.37588	0.041	0.118	1.842e-09	irs2b	0	Superficial_Epithelial_0dpa_vs_1dpa	DAR
chr5-13587672-13588745	9.01901e-15	-1.07387	0.075	0.176	1.8555e-09	AL954191.2	14790	Superficial_Epithelial_0dpa_vs_1dpa	DAR
chr11-31033468-31033840	9.0408e-15	-1.05861	0.074	0.174	1.85998e-09	ier2b	4568	Superficial_Epithelial_0dpa_vs_1dpa	DAR
chr22-14017155-14018308	9.17674e-15	-1.09893	0.068	0.157	1.88795e-09	BX649296.1	1295	Superficial_Epithelial_0dpa_vs_1dpa	DAR
chr1-188566-191080	9.30812e-15	-1.37382	0.056	0.15	1.91498e-09	grtp1a	0	Superficial_Epithelial_0dpa_vs_1dpa	DAR
chr5-68223526-68223894	1.04754e-14	-1.39897	0.037	0.104	2.15513e-09	KIF1C	4373	Superficial_Epithelial_0dpa_vs_1dpa	DAR
chr17-31395919-31397543	1.09149e-14	-1.19752	0.057	0.144	2.24555e-09	itpka	1303	Superficial_Epithelial_0dpa_vs_1dpa	DAR
chr19-47988992-47990215	1.0929e-14	-0.690496	0.195	0.349	2.24844e-09	ctnnb2	0	Superficial_Epithelial_0dpa_vs_1dpa	DAR
chr4-83487-84721	1.15365e-14	-1.37757	0.045	0.132	2.37342e-09	lrp6	5326	Superficial_Epithelial_0dpa_vs_1dpa	DAR
chr22-37559401-37559749	1.16408e-14	-0.904132	0.111	0.228	2.39488e-09	fxr1	0	Superficial_Epithelial_0dpa_vs_1dpa	DAR
chr22-29949519-29950635	1.21085e-14	-1.11464	0.08	0.192	2.49111e-09	dusp5	26646	Superficial_Epithelial_0dpa_vs_1dpa	DAR
chr5-28770179-28771607	1.22144e-14	-1.00613	0.093	0.205	2.51289e-09	trafd1	0	Superficial_Epithelial_0dpa_vs_1dpa	DAR
chr4-20798350-20799219	1.24598e-14	-1.23509	0.054	0.133	2.56338e-09	nav3	13680	Superficial_Epithelial_0dpa_vs_1dpa	DAR
chr19-1527276-1528475	1.27387e-14	-1.26992	0.046	0.121	2.62076e-09	SLC45A4	0	Superficial_Epithelial_0dpa_vs_1dpa	DAR
chr2-15443788-15444857	1.276e-14	-1.45533	0.037	0.111	2.62514e-09	col11a1b	0	Superficial_Epithelial_0dpa_vs_1dpa	DAR
chr6-50531357-50532736	1.29512e-14	-1.04896	0.092	0.211	2.66447e-09	mtss1	48203	Superficial_Epithelial_0dpa_vs_1dpa	DAR
chr24-9213794-9214912	1.31436e-14	-1.20468	0.064	0.162	2.70407e-09	dlgap1b	0	Superficial_Epithelial_0dpa_vs_1dpa	DAR
chr2-56136698-56137457	1.32629e-14	0.363172	0.338	0.32	2.7286e-09	pgpep1	2483	Superficial_Epithelial_0dpa_vs_1dpa	DAR
chr8-17517424-17518314	1.32717e-14	-1.04797	0.086	0.196	2.73041e-09	skia	975	Superficial_Epithelial_0dpa_vs_1dpa	DAR
chr18-38844991-38846013	1.34268e-14	-1.10066	0.074	0.173	2.76232e-09	fam214a	0	Superficial_Epithelial_0dpa_vs_1dpa	DAR
chr1-38387808-38388863	1.37441e-14	0.434309	0.236	0.199	2.82761e-09	hpgd	9832	Superficial_Epithelial_0dpa_vs_1dpa	DAR
chr2-44346114-44347453	1.4572e-14	-0.713091	0.182	0.318	2.99793e-09	zgc:152670	1019	Superficial_Epithelial_0dpa_vs_1dpa	DAR
chr17-16811050-16812679	1.46164e-14	-1.63011	0.03	0.102	3.00707e-09	ston2	2636	Superficial_Epithelial_0dpa_vs_1dpa	DAR
chr22-6777067-6778765	1.47065e-14	-0.997256	0.096	0.212	3.02559e-09	CT583625.5	0	Superficial_Epithelial_0dpa_vs_1dpa	DAR
chr15-47645522-47646525	1.51342e-14	0.44796	0.216	0.191	3.11358e-09	paf1	22069	Superficial_Epithelial_0dpa_vs_1dpa	DAR
chr16-24830556-24831090	1.53204e-14	-1.30246	0.054	0.141	3.15189e-09	si:dkey-79d12.5	0	Superficial_Epithelial_0dpa_vs_1dpa	DAR
chr8-26328478-26328951	1.68343e-14	-1.13221	0.074	0.176	3.46336e-09	prkar2aa	530	Superficial_Epithelial_0dpa_vs_1dpa	DAR
chr19-14416561-14417980	1.70757e-14	0.489413	0.171	0.149	3.51302e-09	arid1ab	0	Superficial_Epithelial_0dpa_vs_1dpa	DAR
chr20-30729056-30729843	1.70842e-14	-0.782056	0.144	0.269	3.51477e-09	nhsl1b	0	Superficial_Epithelial_0dpa_vs_1dpa	DAR
chr9-23329595-23331156	1.79142e-14	-0.837184	0.143	0.286	3.68553e-09	tmem163a	16252	Superficial_Epithelial_0dpa_vs_1dpa	DAR
chr20-37635524-37636701	1.80199e-14	0.353458	0.275	0.267	3.70727e-09	hivep2a	6439	Superficial_Epithelial_0dpa_vs_1dpa	DAR
chr4-4082282-4082540	1.89329e-14	-1.25478	0.05	0.13	3.8951e-09	waslb	0	Superficial_Epithelial_0dpa_vs_1dpa	DAR
chr8-19456009-19456959	1.8987e-14	-1.39314	0.039	0.114	3.90624e-09	zgc:92140	0	Superficial_Epithelial_0dpa_vs_1dpa	DAR
chr5-20500848-20502955	1.92343e-14	-0.996259	0.096	0.206	3.95711e-09	ficd	9575	Superficial_Epithelial_0dpa_vs_1dpa	DAR
chr1-50710015-50710992	1.92437e-14	0.346983	0.34	0.335	3.95904e-09	fam13a	0	Superficial_Epithelial_0dpa_vs_1dpa	DAR
chr10-27167321-27168846	1.94789e-14	0.360534	0.247	0.228	4.00743e-09	BX248510.3	1109	Superficial_Epithelial_0dpa_vs_1dpa	DAR
chr5-41380386-41381668	1.95146e-14	0.693499	0.126	0.088	4.01477e-09	arid3c	0	Superficial_Epithelial_0dpa_vs_1dpa	DAR
chr12-36948479-36949372	1.9983e-14	-0.811565	0.138	0.279	4.11114e-09	cox10	0	Superficial_Epithelial_0dpa_vs_1dpa	DAR
chr7-37739722-37740490	2.06488e-14	-0.924498	0.095	0.199	4.24813e-09	brd7	1808	Superficial_Epithelial_0dpa_vs_1dpa	DAR
chr16-29099696-29100517	2.12921e-14	0.423949	0.209	0.184	4.38046e-09	mef2d	0	Superficial_Epithelial_0dpa_vs_1dpa	DAR
chr7-39805056-39805895	2.1688e-14	-0.72312	0.162	0.298	4.46191e-09	sorcs2	0	Superficial_Epithelial_0dpa_vs_1dpa	DAR
chr14-6297711-6298631	2.17675e-14	-1.13538	0.071	0.18	4.47827e-09	tbc1d2	0	Superficial_Epithelial_0dpa_vs_1dpa	DAR
chr3-25917835-25918714	2.19343e-14	-0.993537	0.078	0.171	4.51259e-09	tom1	0	Superficial_Epithelial_0dpa_vs_1dpa	DAR
chr10-17999056-18000283	2.26624e-14	0.432938	0.173	0.145	4.66238e-09	si:dkey-242g16.2	10276	Superficial_Epithelial_0dpa_vs_1dpa	DAR
chr25-35959950-35960723	2.31577e-14	-1.44205	0.039	0.118	4.76429e-09	snx20	0	Superficial_Epithelial_0dpa_vs_1dpa	DAR
chr4-22498454-22499323	2.41871e-14	-0.934073	0.103	0.224	4.97607e-09	kdm7aa	0	Superficial_Epithelial_0dpa_vs_1dpa	DAR
chr22-29276397-29277381	2.59216e-14	-1.26692	0.052	0.142	5.33291e-09	ncf4	24347	Superficial_Epithelial_0dpa_vs_1dpa	DAR
chr14-67666-68751	2.61564e-14	0.491901	0.2	0.176	5.3812e-09	CABZ01086812.1	964	Superficial_Epithelial_0dpa_vs_1dpa	DAR
chr3-54931302-54932681	2.63464e-14	-1.07347	0.071	0.166	5.42029e-09	rhbdf1a	0	Superficial_Epithelial_0dpa_vs_1dpa	DAR
chr14-23931530-23932424	2.70329e-14	-1.36281	0.038	0.107	5.56153e-09	sh3rf2	0	Superficial_Epithelial_0dpa_vs_1dpa	DAR
chr15-1389110-1390457	2.73374e-14	-1.61157	0.034	0.112	5.62418e-09	schip1	0	Superficial_Epithelial_0dpa_vs_1dpa	DAR
chr5-24837120-24838336	2.74003e-14	-0.884585	0.129	0.276	5.63713e-09	gas2l1	0	Superficial_Epithelial_0dpa_vs_1dpa	DAR
chr2-25161989-25163179	2.86381e-14	-1.56633	0.035	0.109	5.89177e-09	si:dkey-223d7.6	2679	Superficial_Epithelial_0dpa_vs_1dpa	DAR
chr21-18949835-18951673	2.86976e-14	-0.863978	0.132	0.266	5.90401e-09	crkl	0	Superficial_Epithelial_0dpa_vs_1dpa	DAR
chr20-11128649-11129904	2.99247e-14	0.534114	0.155	0.123	6.15646e-09	flrt2	0	Superficial_Epithelial_0dpa_vs_1dpa	DAR
chr25-34855624-34856721	3.31873e-14	-0.72299	0.161	0.293	6.82769e-09	tmem231	0	Superficial_Epithelial_0dpa_vs_1dpa	DAR
chr23-10392232-10393275	3.36289e-14	-0.777333	0.149	0.287	6.91854e-09	eif4ba	3566	Superficial_Epithelial_0dpa_vs_1dpa	DAR
chr21-22687995-22690823	3.40037e-14	-1.29272	0.05	0.127	6.99566e-09	gig2e	0	Superficial_Epithelial_0dpa_vs_1dpa	DAR
chr18-34611182-34613473	3.41867e-14	-0.706273	0.18	0.327	7.0333e-09	tiparp	0	Superficial_Epithelial_0dpa_vs_1dpa	DAR
chr6-44042709-44044833	3.53852e-14	-0.883225	0.122	0.253	7.27986e-09	rybpb	0	Superficial_Epithelial_0dpa_vs_1dpa	DAR
chr7-1016631-1017660	3.67542e-14	-1.15047	0.056	0.131	7.56151e-09	CR926130.1	26762	Superficial_Epithelial_0dpa_vs_1dpa	DAR
chr13-24895155-24895916	3.76583e-14	0.390007	0.27	0.241	7.74752e-09	kat6b	0	Superficial_Epithelial_0dpa_vs_1dpa	DAR
chr13-22781815-22783112	3.86665e-14	-1.12384	0.067	0.16	7.95493e-09	CR550304.1	0	Superficial_Epithelial_0dpa_vs_1dpa	DAR
chr23-10707649-10708784	3.90003e-14	-1.21671	0.055	0.146	8.02361e-09	foxp1a	0	Superficial_Epithelial_0dpa_vs_1dpa	DAR
chr25-21850631-21851506	4.0179e-14	-1.35698	0.042	0.121	8.2661e-09	ckmt1	3077	Superficial_Epithelial_0dpa_vs_1dpa	DAR
chr22-11977062-11977957	4.06335e-14	0.660102	0.129	0.09	8.35961e-09	mgat5	0	Superficial_Epithelial_0dpa_vs_1dpa	DAR
chr3-22538303-22539226	4.1299e-14	0.638353	0.118	0.084	8.49653e-09	wnk4b	0	Superficial_Epithelial_0dpa_vs_1dpa	DAR
chr22-23288527-23289706	4.1364e-14	-1.1201	0.065	0.154	8.50991e-09	C22H1orf53	20633	Superficial_Epithelial_0dpa_vs_1dpa	DAR
chr21-20119676-20120917	4.25556e-14	-1.07922	0.08	0.19	8.75506e-09	dusp4	0	Superficial_Epithelial_0dpa_vs_1dpa	DAR
chr15-17070726-17071498	4.35588e-14	-0.99449	0.092	0.201	8.96144e-09	lgals17	0	Superficial_Epithelial_0dpa_vs_1dpa	DAR
chr7-55491767-55493018	4.36082e-14	-1.19666	0.056	0.141	8.9716e-09	cdt1	25500	Superficial_Epithelial_0dpa_vs_1dpa	DAR
chr3-48279905-48280867	4.43895e-14	0.365369	0.283	0.257	9.13235e-09	tbcd	0	Superficial_Epithelial_0dpa_vs_1dpa	DAR
chr3-23615562-23616686	4.8683e-14	-0.930133	0.097	0.215	1.00157e-08	atp5mc1	11165	Superficial_Epithelial_0dpa_vs_1dpa	DAR
chr21-11036001-11036977	4.98498e-14	-1.29551	0.047	0.122	1.02557e-08	nedd4l	0	Superficial_Epithelial_0dpa_vs_1dpa	DAR
chr13-12796093-12797159	5.12136e-14	-0.815495	0.135	0.258	1.05363e-08	si:ch211-233a24.2	3932	Superficial_Epithelial_0dpa_vs_1dpa	DAR
chr7-73680609-73681670	5.12712e-14	-0.80441	0.135	0.258	1.05481e-08	btr12	0	Superficial_Epithelial_0dpa_vs_1dpa	DAR
chr24-20405221-20406480	5.17138e-14	-1.15039	0.076	0.175	1.06392e-08	plcd1a	0	Superficial_Epithelial_0dpa_vs_1dpa	DAR
chr18-26202554-26204215	5.18096e-14	0.27123	0.368	0.378	1.06589e-08	dre-mir-184-1	0	Superficial_Epithelial_0dpa_vs_1dpa	DAR
chr13-29239526-29241649	5.47083e-14	-1.63523	0.038	0.126	1.12553e-08	myofl	0	Superficial_Epithelial_0dpa_vs_1dpa	DAR
chr6-23825421-23826463	5.726e-14	-1.34395	0.048	0.14	1.17802e-08	glulb	11527	Superficial_Epithelial_0dpa_vs_1dpa	DAR
chr22-35165821-35166878	5.85904e-14	-0.808727	0.145	0.28	1.20539e-08	rnf13	0	Superficial_Epithelial_0dpa_vs_1dpa	DAR
chr12-35663888-35664888	6.07202e-14	-1.26514	0.055	0.147	1.24921e-08	baiap2b	0	Superficial_Epithelial_0dpa_vs_1dpa	DAR
chr8-41621081-41622484	6.17227e-14	-1.06423	0.07	0.163	1.26983e-08	si:ch211-158d24.2	10875	Superficial_Epithelial_0dpa_vs_1dpa	DAR
chr23-23236339-23237075	6.2839e-14	-0.925269	0.104	0.219	1.2928e-08	plekhn1	0	Superficial_Epithelial_0dpa_vs_1dpa	DAR
chr19-11010790-11011346	6.29348e-14	-1.25591	0.051	0.131	1.29477e-08	tpm3	0	Superficial_Epithelial_0dpa_vs_1dpa	DAR
chr7-61917069-61918153	6.45055e-14	-1.52547	0.03	0.102	1.32708e-08	tdrd7b	0	Superficial_Epithelial_0dpa_vs_1dpa	DAR
chr25-17268325-17269459	6.48188e-14	0.605406	0.127	0.094	1.33353e-08	kdm7ab	0	Superficial_Epithelial_0dpa_vs_1dpa	DAR
chr3-54793341-54794118	6.63917e-14	-1.2618	0.047	0.124	1.36589e-08	sc:d0202	0	Superficial_Epithelial_0dpa_vs_1dpa	DAR
chr21-2815828-2816646	6.73394e-14	-1.23541	0.048	0.125	1.38539e-08	CABZ01064472.1	1118	Superficial_Epithelial_0dpa_vs_1dpa	DAR
chr23-5981028-5981809	7.00436e-14	-1.19606	0.063	0.162	1.44102e-08	NAV1	0	Superficial_Epithelial_0dpa_vs_1dpa	DAR
chr14-21369740-21371122	7.06864e-14	-1.21564	0.065	0.161	1.45425e-08	egr1	33354	Superficial_Epithelial_0dpa_vs_1dpa	DAR
chr13-4857184-4858036	7.23745e-14	-1.48197	0.034	0.108	1.48897e-08	mcu	8294	Superficial_Epithelial_0dpa_vs_1dpa	DAR
chr5-65644188-65644955	7.37244e-14	0.74141	0.103	0.07	1.51675e-08	camsap1b	0	Superficial_Epithelial_0dpa_vs_1dpa	DAR
chr21-41150756-41152455	7.66386e-14	0.260607	0.451	0.462	1.5767e-08	msx2b	2937	Superficial_Epithelial_0dpa_vs_1dpa	DAR
chr2-8611357-8612550	7.6994e-14	-1.31608	0.048	0.129	1.58401e-08	si:ch211-71m22.1	0	Superficial_Epithelial_0dpa_vs_1dpa	DAR
chr8-25168179-25169888	7.77278e-14	-1.1028	0.061	0.145	1.59911e-08	gnai3	0	Superficial_Epithelial_0dpa_vs_1dpa	DAR
chr14-45701930-45703005	7.96203e-14	-1.47319	0.036	0.104	1.63804e-08	si:dkey-226n24.1	0	Superficial_Epithelial_0dpa_vs_1dpa	DAR
chr19-32270747-32271567	8.24009e-14	0.345979	0.286	0.269	1.69525e-08	atxn1a	0	Superficial_Epithelial_0dpa_vs_1dpa	DAR
chr6-23686322-23686830	8.24226e-14	-1.31869	0.038	0.102	1.6957e-08	CU062632.1	21613	Superficial_Epithelial_0dpa_vs_1dpa	DAR
chr16-38294161-38296419	8.25044e-14	-1.43904	0.038	0.111	1.69738e-08	bnipl	0	Superficial_Epithelial_0dpa_vs_1dpa	DAR
chr10-28808434-28809353	8.34192e-14	-1.01154	0.073	0.166	1.7162e-08	alcama	0	Superficial_Epithelial_0dpa_vs_1dpa	DAR
chr21-38553251-38554086	8.38526e-14	0.564158	0.139	0.105	1.72512e-08	pof1b	0	Superficial_Epithelial_0dpa_vs_1dpa	DAR
chr10-201803-202475	8.6484e-14	-1.22535	0.056	0.144	1.77925e-08	psmg1	4520	Superficial_Epithelial_0dpa_vs_1dpa	DAR
chr2-37267147-37269152	8.69381e-14	-0.727579	0.174	0.318	1.78859e-08	nadkb	0	Superficial_Epithelial_0dpa_vs_1dpa	DAR
chr5-66032231-66033236	8.8044e-14	0.485387	0.153	0.137	1.81135e-08	nrarpb	3501	Superficial_Epithelial_0dpa_vs_1dpa	DAR
chr6-24668634-24669798	8.92878e-14	0.374045	0.235	0.218	1.83694e-08	znf644b	0	Superficial_Epithelial_0dpa_vs_1dpa	DAR
chr10-4116506-4117399	9.36652e-14	-1.29945	0.041	0.114	1.92699e-08	mn1a	3669	Superficial_Epithelial_0dpa_vs_1dpa	DAR
chr5-30147332-30148164	9.42843e-14	-1.26707	0.048	0.13	1.93973e-08	zbtb44	0	Superficial_Epithelial_0dpa_vs_1dpa	DAR
chr6-1646309-1647585	9.90035e-14	-1.24084	0.057	0.152	2.03682e-08	zgc:123305	55306	Superficial_Epithelial_0dpa_vs_1dpa	DAR
chr18-424697-425789	1.032e-13	-1.41112	0.038	0.103	2.12316e-08	gpib	775	Superficial_Epithelial_0dpa_vs_1dpa	DAR
chr10-20599120-20600503	1.05114e-13	0.575531	0.138	0.115	2.16253e-08	letm2	0	Superficial_Epithelial_0dpa_vs_1dpa	DAR
chr19-43179610-43180374	1.07936e-13	0.62811	0.123	0.09	2.22059e-08	gnrhr1	33152	Superficial_Epithelial_0dpa_vs_1dpa	DAR
chr13-41978531-41979623	1.0883e-13	0.401997	0.239	0.208	2.23898e-08	nanp	30534	Superficial_Epithelial_0dpa_vs_1dpa	DAR
chr19-6502521-6504106	1.0958e-13	-1.58613	0.034	0.107	2.2544e-08	pvrl2l	102090	Superficial_Epithelial_0dpa_vs_1dpa	DAR
chr9-38045395-38046871	1.09852e-13	-1.2061	0.065	0.159	2.26002e-08	stam2	0	Superficial_Epithelial_0dpa_vs_1dpa	DAR
chr15-28586295-28587348	1.11068e-13	0.43781	0.168	0.149	2.28502e-08	ssh2a	0	Superficial_Epithelial_0dpa_vs_1dpa	DAR
chr3-34661457-34662501	1.1166e-13	0.568808	0.146	0.112	2.29721e-08	znfl1	4711	Superficial_Epithelial_0dpa_vs_1dpa	DAR
chr5-29961090-29961963	1.1525e-13	-0.822957	0.134	0.264	2.37107e-08	mir100-2	28183	Superficial_Epithelial_0dpa_vs_1dpa	DAR
chr16-16492931-16494265	1.20035e-13	-1.06603	0.083	0.189	2.46951e-08	nbeal2	0	Superficial_Epithelial_0dpa_vs_1dpa	DAR
chr16-12430189-12431314	1.21702e-13	-1.20618	0.056	0.145	2.5038e-08	ephb6	0	Superficial_Epithelial_0dpa_vs_1dpa	DAR
chr20-10850919-10851878	1.21931e-13	0.5225	0.132	0.114	2.5085e-08	si:ch211-155i14.1	120742	Superficial_Epithelial_0dpa_vs_1dpa	DAR
chr2-24665808-24666803	1.23171e-13	-0.909296	0.107	0.221	2.53403e-08	mast3a	0	Superficial_Epithelial_0dpa_vs_1dpa	DAR
chr18-43152338-43155482	1.24017e-13	-1.23591	0.059	0.151	2.55143e-08	nectin1b	0	Superficial_Epithelial_0dpa_vs_1dpa	DAR
chr5-43434079-43434708	1.32845e-13	0.600208	0.139	0.101	2.73306e-08	rhobtb4	0	Superficial_Epithelial_0dpa_vs_1dpa	DAR
chr5-24871947-24873653	1.42699e-13	-1.07304	0.081	0.188	2.93577e-08	ewsr1b	0	Superficial_Epithelial_0dpa_vs_1dpa	DAR
chr15-13982547-13983234	1.48456e-13	-1.25431	0.055	0.142	3.05422e-08	zgc:162730	1644	Superficial_Epithelial_0dpa_vs_1dpa	DAR
chr17-32350142-32351166	1.48478e-13	0.68266	0.107	0.072	3.05467e-08	dhx32b	0	Superficial_Epithelial_0dpa_vs_1dpa	DAR
chr7-69783541-69784336	1.52157e-13	-1.43394	0.035	0.101	3.13035e-08	USP53	0	Superficial_Epithelial_0dpa_vs_1dpa	DAR
chr8-50270027-50270517	1.57092e-13	-1.21723	0.049	0.122	3.23188e-08	nkx3-1	10578	Superficial_Epithelial_0dpa_vs_1dpa	DAR
chr23-13533531-13534300	1.59378e-13	-0.936821	0.098	0.206	3.27891e-08	uckl1b	0	Superficial_Epithelial_0dpa_vs_1dpa	DAR
chr4-16873862-16874733	1.59818e-13	0.723752	0.116	0.079	3.28797e-08	tmpoa	0	Superficial_Epithelial_0dpa_vs_1dpa	DAR
chr23-39476844-39477609	1.60273e-13	-1.02201	0.078	0.173	3.29734e-08	mical1	0	Superficial_Epithelial_0dpa_vs_1dpa	DAR
chr5-27460011-27461247	1.6758e-13	0.676829	0.136	0.098	3.44765e-08	loxl2b	0	Superficial_Epithelial_0dpa_vs_1dpa	DAR
chr18-14341445-14342165	1.69199e-13	-1.03967	0.073	0.17	3.48096e-08	si:dkey-246g23.2	160	Superficial_Epithelial_0dpa_vs_1dpa	DAR
chr5-30073105-30074635	1.69852e-13	0.564246	0.117	0.093	3.49441e-08	bco2a	0	Superficial_Epithelial_0dpa_vs_1dpa	DAR
chr7-34580159-34580985	1.70614e-13	-1.09714	0.07	0.164	3.51009e-08	fhod1	0	Superficial_Epithelial_0dpa_vs_1dpa	DAR
chr11-44297255-44297623	1.7205e-13	-1.381	0.042	0.122	3.53962e-08	gnb4b	0	Superficial_Epithelial_0dpa_vs_1dpa	DAR
chr17-49023918-49026252	1.72226e-13	-1.29813	0.055	0.153	3.54325e-08	CABZ01088109.1	4266	Superficial_Epithelial_0dpa_vs_1dpa	DAR
chr24-2201225-2202067	1.75288e-13	-1.18659	0.059	0.151	3.60624e-08	cul2	81891	Superficial_Epithelial_0dpa_vs_1dpa	DAR
chr24-5831022-5831902	1.7579e-13	0.662844	0.138	0.098	3.61656e-08	si:ch211-157j23.2	0	Superficial_Epithelial_0dpa_vs_1dpa	DAR
chr25-31336779-31338383	1.76857e-13	-1.30615	0.052	0.144	3.63851e-08	lsp1a	0	Superficial_Epithelial_0dpa_vs_1dpa	DAR
chr13-5792419-5793553	1.79286e-13	0.754017	0.112	0.073	3.68848e-08	spred2b	77090	Superficial_Epithelial_0dpa_vs_1dpa	DAR
chr2-43241488-43242148	1.79755e-13	-0.846178	0.123	0.254	3.69813e-08	pard3ab	0	Superficial_Epithelial_0dpa_vs_1dpa	DAR
chr24-2267371-2269061	1.82055e-13	-0.935858	0.106	0.221	3.74546e-08	cul2	14897	Superficial_Epithelial_0dpa_vs_1dpa	DAR
chr16-16865859-16866621	1.8498e-13	-1.36234	0.041	0.113	3.80564e-08	myh14	0	Superficial_Epithelial_0dpa_vs_1dpa	DAR
chr1-13978448-13979746	1.85664e-13	-0.700047	0.174	0.318	3.81971e-08	elf2b	0	Superficial_Epithelial_0dpa_vs_1dpa	DAR
chr17-53383499-53383800	1.87172e-13	-0.687482	0.182	0.333	3.85072e-08	CABZ01117357.1	4438	Superficial_Epithelial_0dpa_vs_1dpa	DAR
chr11-27958630-27959673	1.93684e-13	-0.788575	0.137	0.273	3.9847e-08	ece1	0	Superficial_Epithelial_0dpa_vs_1dpa	DAR
chr12-33391684-33392135	1.95409e-13	0.367473	0.24	0.227	4.02018e-08	fasn	0	Superficial_Epithelial_0dpa_vs_1dpa	DAR
chr3-32941094-32943178	2.10048e-13	-1.12127	0.063	0.147	4.32137e-08	nbr1b	0	Superficial_Epithelial_0dpa_vs_1dpa	DAR
chr20-21923112-21924127	2.1168e-13	-1.18647	0.056	0.139	4.35494e-08	daam1b	0	Superficial_Epithelial_0dpa_vs_1dpa	DAR
chr6-43021016-43023052	2.12776e-13	-1.00555	0.1	0.227	4.37748e-08	glyctk	0	Superficial_Epithelial_0dpa_vs_1dpa	DAR
chr12-23492780-23493687	2.17744e-13	-1.16585	0.061	0.152	4.47969e-08	BX005058.2	0	Superficial_Epithelial_0dpa_vs_1dpa	DAR
chr6-24432539-24433652	2.21685e-13	-1.15332	0.072	0.176	4.56076e-08	tgfbr3	0	Superficial_Epithelial_0dpa_vs_1dpa	DAR
chr12-1059456-1060826	2.2261e-13	-0.835087	0.134	0.251	4.57981e-08	sox8a	11659	Superficial_Epithelial_0dpa_vs_1dpa	DAR
chr14-15988489-15990782	2.24509e-13	-1.18411	0.054	0.14	4.61886e-08	trim105	0	Superficial_Epithelial_0dpa_vs_1dpa	DAR
chr10-8148784-8149425	2.25011e-13	-0.881049	0.103	0.211	4.62919e-08	CU633857.1	0	Superficial_Epithelial_0dpa_vs_1dpa	DAR
chr15-29734233-29734898	2.27689e-13	-1.18771	0.051	0.125	4.6843e-08	zgc:153372	0	Superficial_Epithelial_0dpa_vs_1dpa	DAR
chr20-11122170-11123443	2.28663e-13	-1.01564	0.08	0.179	4.70434e-08	flrt2	0	Superficial_Epithelial_0dpa_vs_1dpa	DAR
chr10-42263659-42264926	2.35047e-13	-1.45343	0.041	0.121	4.83568e-08	tcf7l1a	0	Superficial_Epithelial_0dpa_vs_1dpa	DAR
chr23-38205040-38206485	2.63696e-13	-1.06393	0.077	0.178	5.42508e-08	zgc:112994	22282	Superficial_Epithelial_0dpa_vs_1dpa	DAR
chr8-3990979-3991981	2.63861e-13	-0.967294	0.091	0.195	5.42846e-08	mtmr3	0	Superficial_Epithelial_0dpa_vs_1dpa	DAR
chr25-9179375-9180880	2.66908e-13	-0.984648	0.095	0.203	5.49115e-08	im:7145024	138462	Superficial_Epithelial_0dpa_vs_1dpa	DAR
chr14-28220396-28221979	2.7825e-13	-0.868216	0.107	0.216	5.72449e-08	mid2	59764	Superficial_Epithelial_0dpa_vs_1dpa	DAR
chr1-18614893-18615464	2.841e-13	0.302295	0.328	0.325	5.84485e-08	klf3	0	Superficial_Epithelial_0dpa_vs_1dpa	DAR
chr11-18664566-18667739	2.86967e-13	-0.686861	0.178	0.315	5.90383e-08	ncoa3	0	Superficial_Epithelial_0dpa_vs_1dpa	DAR
chr25-34299667-34300736	2.87165e-13	0.674668	0.111	0.079	5.90791e-08	gcnt3	15522	Superficial_Epithelial_0dpa_vs_1dpa	DAR
chr7-922205-922857	2.88608e-13	-0.967457	0.085	0.18	5.93759e-08	CR926130.2	13270	Superficial_Epithelial_0dpa_vs_1dpa	DAR
chr19-30721366-30723062	2.9229e-13	-0.825425	0.128	0.243	6.01334e-08	trit1	0	Superficial_Epithelial_0dpa_vs_1dpa	DAR
chr5-43012696-43013548	2.99532e-13	-1.45097	0.039	0.112	6.16234e-08	aqp3a	881	Superficial_Epithelial_0dpa_vs_1dpa	DAR
chr13-35389666-35390975	3.10783e-13	-0.790116	0.143	0.276	6.3938e-08	jag1b	0	Superficial_Epithelial_0dpa_vs_1dpa	DAR
chr12-22347303-22349214	3.13324e-13	-1.30273	0.043	0.121	6.44607e-08	nsfb	0	Superficial_Epithelial_0dpa_vs_1dpa	DAR
chr2-33243088-33244255	3.16235e-13	0.327361	0.271	0.249	6.50596e-08	rnf220a	26347	Superficial_Epithelial_0dpa_vs_1dpa	DAR
chr11-36996233-36996861	3.22726e-13	0.74563	0.1	0.069	6.6395e-08	tkta	0	Superficial_Epithelial_0dpa_vs_1dpa	DAR
chr7-68404375-68405372	3.27685e-13	-1.00402	0.088	0.194	6.74154e-08	CU468723.4	0	Superficial_Epithelial_0dpa_vs_1dpa	DAR
chr16-22660159-22661364	3.34325e-13	-1.12328	0.052	0.125	6.87814e-08	chrnb2	0	Superficial_Epithelial_0dpa_vs_1dpa	DAR
chr19-4814516-4815343	3.3553e-13	-1.16815	0.053	0.133	6.90292e-08	st3gal1l	755	Superficial_Epithelial_0dpa_vs_1dpa	DAR
chr22-29927137-29928279	3.40848e-13	-0.623173	0.216	0.368	7.01233e-08	dusp5	4264	Superficial_Epithelial_0dpa_vs_1dpa	DAR
chr8-39837059-39839856	3.41128e-13	-1.16823	0.057	0.138	7.01809e-08	zgc:174931	0	Superficial_Epithelial_0dpa_vs_1dpa	DAR
chr17-45403747-45405124	3.43805e-13	-1.27853	0.055	0.132	7.07317e-08	tagapa	0	Superficial_Epithelial_0dpa_vs_1dpa	DAR
chr4-11536214-11537172	3.63968e-13	-0.920262	0.105	0.213	7.48798e-08	asb13a.2	11325	Superficial_Epithelial_0dpa_vs_1dpa	DAR
chr16-23427210-23428253	3.64624e-13	0.50852	0.13	0.112	7.50148e-08	icn	2935	Superficial_Epithelial_0dpa_vs_1dpa	DAR
chr18-45755598-45756423	3.72525e-13	-1.07345	0.063	0.15	7.66403e-08	cstf3	0	Superficial_Epithelial_0dpa_vs_1dpa	DAR
chr12-17738566-17739362	3.97743e-13	-1.02428	0.075	0.173	8.18284e-08	CT033796.2	0	Superficial_Epithelial_0dpa_vs_1dpa	DAR
chr13-44731781-44733340	4.04767e-13	-1.25411	0.049	0.128	8.32735e-08	zfand3	0	Superficial_Epithelial_0dpa_vs_1dpa	DAR
chr1-44194013-44194822	4.05236e-13	-0.9483	0.098	0.212	8.33699e-08	ctnnd1	0	Superficial_Epithelial_0dpa_vs_1dpa	DAR
chr3-47325707-47326743	4.18765e-13	-1.38853	0.048	0.132	8.61533e-08	ppap2d	0	Superficial_Epithelial_0dpa_vs_1dpa	DAR
chr22-29388783-29389640	4.21977e-13	-1.04549	0.065	0.148	8.68142e-08	pdgfba	52473	Superficial_Epithelial_0dpa_vs_1dpa	DAR
chr12-17028140-17030295	4.37542e-13	-0.903972	0.109	0.222	9.00163e-08	ifit10	0	Superficial_Epithelial_0dpa_vs_1dpa	DAR
chr5-18870653-18871605	4.38095e-13	-1.21099	0.053	0.138	9.01302e-08	aacs	0	Superficial_Epithelial_0dpa_vs_1dpa	DAR
chr16-7226802-7228588	4.45943e-13	0.48273	0.149	0.131	9.17448e-08	nt5c3a	0	Superficial_Epithelial_0dpa_vs_1dpa	DAR
chr4-11584450-11585324	4.57151e-13	-1.07527	0.073	0.167	9.40507e-08	net1	0	Superficial_Epithelial_0dpa_vs_1dpa	DAR
chr12-4481818-4482757	4.5944e-13	-1.08538	0.066	0.151	9.45214e-08	trpm4b.2	4803	Superficial_Epithelial_0dpa_vs_1dpa	DAR
chr6-28823080-28823993	4.64375e-13	-1.07372	0.076	0.174	9.55367e-08	tp63	0	Superficial_Epithelial_0dpa_vs_1dpa	DAR
chr15-25523219-25523710	4.83185e-13	0.473097	0.187	0.155	9.94066e-08	hif1al	0	Superficial_Epithelial_0dpa_vs_1dpa	DAR
chr23-26474226-26475448	4.89296e-13	-1.05147	0.08	0.187	1.00664e-07	MAGI3	0	Superficial_Epithelial_0dpa_vs_1dpa	DAR
chr3-51717907-51719148	5.12482e-13	-1.04361	0.077	0.178	1.05434e-07	baiap2a	0	Superficial_Epithelial_0dpa_vs_1dpa	DAR
chr22-30351997-30353006	5.26638e-13	-0.860425	0.122	0.236	1.08346e-07	mxi1	0	Superficial_Epithelial_0dpa_vs_1dpa	DAR
chr17-37697675-37698359	5.42066e-13	-1.27335	0.04	0.106	1.1152e-07	tmem229b	47846	Superficial_Epithelial_0dpa_vs_1dpa	DAR
chr21-6119394-6120653	5.4259e-13	-1.0871	0.074	0.17	1.11628e-07	fpgs	0	Superficial_Epithelial_0dpa_vs_1dpa	DAR
chr12-34727206-34727724	5.50543e-13	-1.23638	0.049	0.124	1.13264e-07	bahcc1b	0	Superficial_Epithelial_0dpa_vs_1dpa	DAR
chr16-26645230-26646239	5.52639e-13	0.587968	0.129	0.094	1.13696e-07	esrp1	0	Superficial_Epithelial_0dpa_vs_1dpa	DAR
chr7-904181-904890	5.53258e-13	-1.02234	0.072	0.166	1.13823e-07	CABZ01112025.1	12684	Superficial_Epithelial_0dpa_vs_1dpa	DAR
chr15-34901419-34903229	6.01537e-13	-0.862717	0.106	0.221	1.23755e-07	dhx16	0	Superficial_Epithelial_0dpa_vs_1dpa	DAR
chr11-25804029-25805125	6.12583e-13	-0.698673	0.166	0.303	1.26028e-07	skib	0	Superficial_Epithelial_0dpa_vs_1dpa	DAR
chr20-48735607-48736845	6.14475e-13	0.600539	0.122	0.093	1.26417e-07	BX663521.4	2041	Superficial_Epithelial_0dpa_vs_1dpa	DAR
chr3-11746142-11747287	6.29345e-13	0.515296	0.111	0.094	1.29476e-07	FOXK2	32401	Superficial_Epithelial_0dpa_vs_1dpa	DAR
chr22-24249784-24250349	6.3647e-13	0.634892	0.122	0.087	1.30942e-07	BX649608.1	0	Superficial_Epithelial_0dpa_vs_1dpa	DAR
chr3-34504594-34505963	6.47196e-13	-1.40581	0.039	0.114	1.33149e-07	sept9a	0	Superficial_Epithelial_0dpa_vs_1dpa	DAR
chr15-36451123-36452388	6.50791e-13	-1.39519	0.037	0.105	1.33889e-07	si:dkey-262k9.2	0	Superficial_Epithelial_0dpa_vs_1dpa	DAR
chr2-48366359-48367275	6.58329e-13	-1.03643	0.082	0.185	1.35439e-07	per2	0	Superficial_Epithelial_0dpa_vs_1dpa	DAR
chr5-24340534-24341119	6.72361e-13	0.328778	0.288	0.265	1.38326e-07	znf703	6849	Superficial_Epithelial_0dpa_vs_1dpa	DAR
chr18-50612346-50615473	6.72611e-13	0.262246	0.349	0.363	1.38378e-07	zgc:158464	0	Superficial_Epithelial_0dpa_vs_1dpa	DAR
chr16-29590342-29591343	6.93059e-13	-0.991754	0.08	0.176	1.42584e-07	mcl1b	2372	Superficial_Epithelial_0dpa_vs_1dpa	DAR
chr7-19232062-19232923	7.05599e-13	-1.03144	0.068	0.149	1.45164e-07	dock11	0	Superficial_Epithelial_0dpa_vs_1dpa	DAR
chr9-3078798-3080220	7.08847e-13	0.36099	0.271	0.24	1.45832e-07	ppp1r9ala	0	Superficial_Epithelial_0dpa_vs_1dpa	DAR
chr13-27136586-27137817	7.24771e-13	-0.924291	0.102	0.218	1.49109e-07	slc24a3	0	Superficial_Epithelial_0dpa_vs_1dpa	DAR
chr20-5156124-5157138	7.25312e-13	-1.24907	0.043	0.106	1.4922e-07	ccdc85cb	1280	Superficial_Epithelial_0dpa_vs_1dpa	DAR
chr11-25928586-25929137	7.43496e-13	-0.935861	0.089	0.189	1.52961e-07	kaznb	0	Superficial_Epithelial_0dpa_vs_1dpa	DAR
chr16-34028569-34029475	7.68126e-13	-1.01889	0.069	0.153	1.58028e-07	tent5ba	17257	Superficial_Epithelial_0dpa_vs_1dpa	DAR
chr10-26163562-26164603	7.75335e-13	0.396409	0.189	0.184	1.59511e-07	trim3b	0	Superficial_Epithelial_0dpa_vs_1dpa	DAR
chr6-33429749-33430883	7.84292e-13	-0.839661	0.121	0.238	1.61354e-07	CR933860.1	12450	Superficial_Epithelial_0dpa_vs_1dpa	DAR
chr13-37418342-37419516	7.99401e-13	-1.08357	0.07	0.161	1.64462e-07	ppp2r5eb	1816	Superficial_Epithelial_0dpa_vs_1dpa	DAR
chr9-46911264-46912284	8.09765e-13	-1.29901	0.044	0.118	1.66595e-07	igfbp5b	69084	Superficial_Epithelial_0dpa_vs_1dpa	DAR
chr25-33012970-33014057	8.27173e-13	-1.40696	0.042	0.117	1.70176e-07	CABZ01046980.1	0	Superficial_Epithelial_0dpa_vs_1dpa	DAR
chr1-45024479-45025433	8.33426e-13	0.578142	0.132	0.1	1.71462e-07	smu1b	0	Superficial_Epithelial_0dpa_vs_1dpa	DAR
chr17-27223642-27224509	8.34222e-13	-0.909501	0.106	0.214	1.71626e-07	asap3	0	Superficial_Epithelial_0dpa_vs_1dpa	DAR
chr5-9827277-9827612	8.34659e-13	-1.39512	0.035	0.101	1.71716e-07	zgc:158343	2368	Superficial_Epithelial_0dpa_vs_1dpa	DAR
chr9-39981130-39981881	8.71768e-13	0.458746	0.175	0.143	1.7935e-07	ikzf2	0	Superficial_Epithelial_0dpa_vs_1dpa	DAR
chr18-43112146-43113498	8.83539e-13	-1.14663	0.082	0.196	1.81772e-07	nectin1b	0	Superficial_Epithelial_0dpa_vs_1dpa	DAR
chr1-40423203-40424483	8.91527e-13	-1.40783	0.045	0.125	1.83416e-07	maml3	0	Superficial_Epithelial_0dpa_vs_1dpa	DAR
chr23-3755425-3756777	8.981e-13	-0.788692	0.142	0.271	1.84768e-07	hmga1a	0	Superficial_Epithelial_0dpa_vs_1dpa	DAR
chr12-20453846-20454374	9.01452e-13	-1.0747	0.057	0.132	1.85457e-07	arhgap17a	0	Superficial_Epithelial_0dpa_vs_1dpa	DAR
chr20-37535629-37537219	9.31014e-13	-0.879749	0.104	0.217	1.91539e-07	hivep2a	0	Superficial_Epithelial_0dpa_vs_1dpa	DAR
chr10-15872784-15873383	9.43759e-13	-1.35903	0.038	0.105	1.94161e-07	tjp2a	0	Superficial_Epithelial_0dpa_vs_1dpa	DAR
chr8-26782232-26782899	9.49836e-13	-0.978058	0.079	0.168	1.95412e-07	kazna	0	Superficial_Epithelial_0dpa_vs_1dpa	DAR
chr2-21476993-21477850	9.5316e-13	-0.785635	0.134	0.254	1.96095e-07	afg3l2	7094	Superficial_Epithelial_0dpa_vs_1dpa	DAR
chr15-3750479-3751374	9.6845e-13	-1.38886	0.038	0.11	1.99241e-07	lpar6a	13705	Superficial_Epithelial_0dpa_vs_1dpa	DAR
chr23-22277010-22278231	1.0011e-12	-1.29107	0.044	0.116	2.05959e-07	rap1gap	0	Superficial_Epithelial_0dpa_vs_1dpa	DAR
chr23-29009497-29011041	1.07039e-12	-1.33174	0.044	0.119	2.20214e-07	casz1	4743	Superficial_Epithelial_0dpa_vs_1dpa	DAR
chr25-13522535-13524037	1.08877e-12	0.321667	0.232	0.232	2.23995e-07	snrkb	0	Superficial_Epithelial_0dpa_vs_1dpa	DAR
chr3-19523291-19524063	1.11799e-12	0.651297	0.13	0.094	2.30006e-07	CU571315.2	5828	Superficial_Epithelial_0dpa_vs_1dpa	DAR
chr2-35604740-35605363	1.13844e-12	-1.31994	0.039	0.107	2.34213e-07	plk3	0	Superficial_Epithelial_0dpa_vs_1dpa	DAR
chr22-39096679-39098232	1.16832e-12	-1.22436	0.057	0.151	2.4036e-07	gmppb	0	Superficial_Epithelial_0dpa_vs_1dpa	DAR
chr8-16802316-16802967	1.18005e-12	-1.16751	0.052	0.13	2.42775e-07	CR925863.1	0	Superficial_Epithelial_0dpa_vs_1dpa	DAR
chr7-65538395-65539382	1.18743e-12	-1.03373	0.073	0.165	2.44292e-07	mical2a	0	Superficial_Epithelial_0dpa_vs_1dpa	DAR
chr8-32804553-32806417	1.20443e-12	-0.862795	0.109	0.221	2.47789e-07	zgc:194839	0	Superficial_Epithelial_0dpa_vs_1dpa	DAR
chr23-39859151-39860153	1.24465e-12	-1.38527	0.041	0.117	2.56065e-07	si:ch73-217b7.1	0	Superficial_Epithelial_0dpa_vs_1dpa	DAR
chr11-21905488-21906595	1.24862e-12	0.484061	0.149	0.126	2.5688e-07	foxp4	3747	Superficial_Epithelial_0dpa_vs_1dpa	DAR
chr9-46385844-46387153	1.27353e-12	-1.74546	0.03	0.102	2.62006e-07	lct	0	Superficial_Epithelial_0dpa_vs_1dpa	DAR
chr10-15571480-15572515	1.31876e-12	-1.13478	0.069	0.165	2.7131e-07	erbin	0	Superficial_Epithelial_0dpa_vs_1dpa	DAR
chr7-29686460-29687134	1.35513e-12	0.40742	0.223	0.19	2.78793e-07	vps13c	0	Superficial_Epithelial_0dpa_vs_1dpa	DAR
chr7-27438585-27439823	1.35643e-12	0.441316	0.174	0.15	2.79061e-07	sox6	0	Superficial_Epithelial_0dpa_vs_1dpa	DAR
chr18-20283131-20284414	1.36304e-12	-1.09845	0.063	0.151	2.80421e-07	tle3a	25619	Superficial_Epithelial_0dpa_vs_1dpa	DAR
chr15-8947966-8948815	1.40357e-12	0.436969	0.196	0.16	2.88759e-07	CR847977.1	38827	Superficial_Epithelial_0dpa_vs_1dpa	DAR
chr3-56576258-56577129	1.44857e-12	-1.08684	0.061	0.147	2.98017e-07	rac1b	0	Superficial_Epithelial_0dpa_vs_1dpa	DAR
chr24-5965249-5966097	1.48166e-12	-1.24812	0.045	0.122	3.04825e-07	abi1a	0	Superficial_Epithelial_0dpa_vs_1dpa	DAR
chr1-17680044-17681494	1.49659e-12	-1.03602	0.073	0.165	3.07897e-07	cfap97	0	Superficial_Epithelial_0dpa_vs_1dpa	DAR
chr20-29552030-29553840	1.5425e-12	-1.18758	0.054	0.137	3.17342e-07	ywhaqa	12065	Superficial_Epithelial_0dpa_vs_1dpa	DAR
chr20-29504964-29506421	1.58e-12	0.281378	0.352	0.362	3.25057e-07	klf11a	0	Superficial_Epithelial_0dpa_vs_1dpa	DAR
chr4-8149099-8150028	1.58619e-12	0.576758	0.123	0.1	3.26329e-07	wnk1b	0	Superficial_Epithelial_0dpa_vs_1dpa	DAR
chr3-48473152-48473877	1.71486e-12	-1.25039	0.052	0.141	3.52802e-07	metrnla	0	Superficial_Epithelial_0dpa_vs_1dpa	DAR
chr8-4521475-4522415	1.71815e-12	0.367616	0.222	0.208	3.53478e-07	dhx37	0	Superficial_Epithelial_0dpa_vs_1dpa	DAR
chr18-16136245-16136964	1.72136e-12	-0.927747	0.087	0.179	3.54139e-07	ctsd	0	Superficial_Epithelial_0dpa_vs_1dpa	DAR
chr12-27539659-27540892	1.77006e-12	-1.23315	0.061	0.159	3.64158e-07	AL833789.1	0	Superficial_Epithelial_0dpa_vs_1dpa	DAR
chr8-16448199-16448995	1.77658e-12	-0.889236	0.103	0.203	3.655e-07	rnf11b	0	Superficial_Epithelial_0dpa_vs_1dpa	DAR
chr13-33024156-33025080	1.77839e-12	0.293506	0.329	0.329	3.65871e-07	arg2	0	Superficial_Epithelial_0dpa_vs_1dpa	DAR
chr13-25441448-25442606	1.81914e-12	-1.42872	0.035	0.104	3.74256e-07	BX530079.1	1377	Superficial_Epithelial_0dpa_vs_1dpa	DAR
chr1-12529451-12530503	1.8425e-12	0.466397	0.181	0.15	3.79061e-07	BX511261.1	12855	Superficial_Epithelial_0dpa_vs_1dpa	DAR
chr21-11618765-11620244	1.8531e-12	-1.30057	0.04	0.109	3.81242e-07	cast	0	Superficial_Epithelial_0dpa_vs_1dpa	DAR
chr7-22947201-22948956	1.96307e-12	-1.01087	0.081	0.178	4.03866e-07	tnfsf10l	0	Superficial_Epithelial_0dpa_vs_1dpa	DAR
chr10-28248504-28249040	1.97029e-12	-1.14339	0.058	0.142	4.05352e-07	CU207388.1	3637	Superficial_Epithelial_0dpa_vs_1dpa	DAR
chr2-42707717-42709630	1.9918e-12	-0.98385	0.085	0.183	4.09778e-07	ftr11	0	Superficial_Epithelial_0dpa_vs_1dpa	DAR
chr12-33774189-33775809	2.01036e-12	-0.779261	0.147	0.279	4.13594e-07	llgl2	0	Superficial_Epithelial_0dpa_vs_1dpa	DAR
chr7-33788868-33789694	2.03435e-12	0.595324	0.11	0.083	4.18531e-07	uacab	8436	Superficial_Epithelial_0dpa_vs_1dpa	DAR
chr21-11045358-11046352	2.05673e-12	-1.18861	0.051	0.129	4.23136e-07	nedd4l	0	Superficial_Epithelial_0dpa_vs_1dpa	DAR
chr6-19646858-19648105	2.06601e-12	-1.22668	0.044	0.11	4.25043e-07	usp43a	0	Superficial_Epithelial_0dpa_vs_1dpa	DAR
chr3-56699127-56700261	2.10299e-12	-0.736433	0.176	0.321	4.32652e-07	rnf213a	0	Superficial_Epithelial_0dpa_vs_1dpa	DAR
chr16-44767239-44768520	2.12487e-12	0.424538	0.152	0.135	4.37153e-07	upk1a	0	Superficial_Epithelial_0dpa_vs_1dpa	DAR
chr11-11573241-11573970	2.24484e-12	0.676373	0.104	0.073	4.61835e-07	krt99	0	Superficial_Epithelial_0dpa_vs_1dpa	DAR
chr12-34523875-34524562	2.27685e-12	-0.904131	0.092	0.19	4.6842e-07	CR932362.1	0	Superficial_Epithelial_0dpa_vs_1dpa	DAR
chr13-23977-24412	2.38214e-12	-1.52213	0.032	0.1	4.90082e-07	ppp4r3b	8623	Superficial_Epithelial_0dpa_vs_1dpa	DAR
chr9-12491353-12491937	2.49005e-12	-1.48189	0.034	0.104	5.12282e-07	igf2bp2a	0	Superficial_Epithelial_0dpa_vs_1dpa	DAR
chr25-35124175-35124958	2.49531e-12	0.595525	0.107	0.085	5.13366e-07	zgc:171759	0	Superficial_Epithelial_0dpa_vs_1dpa	DAR
chr21-2936598-2938569	2.4987e-12	-0.95955	0.093	0.197	5.14063e-07	CABZ01023255.1	1142	Superficial_Epithelial_0dpa_vs_1dpa	DAR
chr14-45475185-45475910	2.6482e-12	-1.111	0.053	0.124	5.4482e-07	ubxn1	0	Superficial_Epithelial_0dpa_vs_1dpa	DAR
chr6-33819901-33820728	2.6691e-12	-1.3316	0.039	0.114	5.4912e-07	CR855206.2	0	Superficial_Epithelial_0dpa_vs_1dpa	DAR
chr23-42334183-42336989	2.68907e-12	-0.687343	0.187	0.333	5.53227e-07	cyp2aa7	0	Superficial_Epithelial_0dpa_vs_1dpa	DAR
chr7-60343808-60345175	2.72091e-12	-1.0508	0.074	0.167	5.59777e-07	plcb3	0	Superficial_Epithelial_0dpa_vs_1dpa	DAR
chr3-40565519-40566431	3.05866e-12	-1.52183	0.033	0.1	6.29264e-07	fscn1a	10015	Superficial_Epithelial_0dpa_vs_1dpa	DAR
chr10-9160887-9161931	3.10298e-12	-1.10618	0.069	0.165	6.38383e-07	rasgef1bb	0	Superficial_Epithelial_0dpa_vs_1dpa	DAR
chr13-49346306-49346750	3.13252e-12	-1.20787	0.045	0.111	6.44459e-07	irf2bp2a	96475	Superficial_Epithelial_0dpa_vs_1dpa	DAR
chr3-27698142-27700099	3.14992e-12	0.25622	0.375	0.361	6.48039e-07	clcn7	0	Superficial_Epithelial_0dpa_vs_1dpa	DAR
chr11-29939056-29939752	3.16067e-12	-0.976452	0.081	0.176	6.50252e-07	zgc:113276	0	Superficial_Epithelial_0dpa_vs_1dpa	DAR
chr19-10984970-10987149	3.18916e-12	0.618953	0.123	0.094	6.56112e-07	si:ch1073-70f20.1	0	Superficial_Epithelial_0dpa_vs_1dpa	DAR
chr7-18676717-18677448	3.23294e-12	-0.85229	0.106	0.213	6.6512e-07	nectin4a	0	Superficial_Epithelial_0dpa_vs_1dpa	DAR
chr7-14000460-14001079	3.23414e-12	-1.20095	0.049	0.122	6.65366e-07	furina	0	Superficial_Epithelial_0dpa_vs_1dpa	DAR
chr5-67645003-67646972	3.25523e-12	0.301079	0.264	0.26	6.69704e-07	zbtb20	0	Superficial_Epithelial_0dpa_vs_1dpa	DAR
chr1-49811538-49812891	3.25901e-12	-1.44278	0.035	0.11	6.70482e-07	lef1	1569	Superficial_Epithelial_0dpa_vs_1dpa	DAR
chr13-47182533-47184123	3.27194e-12	0.395587	0.171	0.16	6.73144e-07	anapc1	4253	Superficial_Epithelial_0dpa_vs_1dpa	DAR
chr20-16884085-16885525	3.29053e-12	-0.719355	0.174	0.309	6.76968e-07	nfkbiaa	0	Superficial_Epithelial_0dpa_vs_1dpa	DAR
chr5-44714953-44715642	3.30217e-12	-1.07086	0.065	0.15	6.79362e-07	dapk1	0	Superficial_Epithelial_0dpa_vs_1dpa	DAR
chr7-71531181-71533436	3.36839e-12	-0.752934	0.167	0.304	6.92985e-07	acer2	0	Superficial_Epithelial_0dpa_vs_1dpa	DAR
chr13-5682722-5683961	3.37696e-12	-1.42735	0.037	0.113	6.9475e-07	CR926469.1	88716	Superficial_Epithelial_0dpa_vs_1dpa	DAR
chr5-38589636-38592268	3.38312e-12	-1.1362	0.062	0.144	6.96016e-07	mogat3b	4361	Superficial_Epithelial_0dpa_vs_1dpa	DAR
chr15-47995699-47996701	3.38749e-12	0.621539	0.101	0.075	6.96914e-07	SAMD4B	39310	Superficial_Epithelial_0dpa_vs_1dpa	DAR
chr3-24640416-24642161	3.62213e-12	-1.14728	0.054	0.127	7.45188e-07	zgc:113411	0	Superficial_Epithelial_0dpa_vs_1dpa	DAR
chr13-36028003-36028784	3.66265e-12	0.39978	0.214	0.191	7.53525e-07	si:dkey-157l19.2	0	Superficial_Epithelial_0dpa_vs_1dpa	DAR
chr20-23606312-23607207	3.67953e-12	-1.24201	0.055	0.141	7.56996e-07	palld	0	Superficial_Epithelial_0dpa_vs_1dpa	DAR
chr16-44755076-44756089	3.73338e-12	0.621528	0.119	0.087	7.68076e-07	zmp:0000000951	0	Superficial_Epithelial_0dpa_vs_1dpa	DAR
chr13-47299118-47300091	3.77609e-12	-0.846726	0.119	0.232	7.76864e-07	bcl2l11	61012	Superficial_Epithelial_0dpa_vs_1dpa	DAR
chr21-14670700-14672544	3.78523e-12	-1.36405	0.042	0.115	7.78742e-07	ehmt1b	0	Superficial_Epithelial_0dpa_vs_1dpa	DAR
chr8-18624377-18625801	3.78645e-12	-1.21781	0.045	0.107	7.78994e-07	fsd1	0	Superficial_Epithelial_0dpa_vs_1dpa	DAR
chr18-9398223-9399736	3.80804e-12	-0.856183	0.109	0.227	7.83436e-07	sema3ab	0	Superficial_Epithelial_0dpa_vs_1dpa	DAR
chr10-35223960-35224702	3.84669e-12	-0.974949	0.071	0.154	7.91387e-07	ypel2a	0	Superficial_Epithelial_0dpa_vs_1dpa	DAR
chr25-30967081-30968373	3.9385e-12	-1.00294	0.069	0.151	8.10276e-07	CR381618.1	0	Superficial_Epithelial_0dpa_vs_1dpa	DAR
chr25-5272453-5274018	4.03084e-12	0.421063	0.196	0.169	8.29274e-07	CABZ01039863.1	11127	Superficial_Epithelial_0dpa_vs_1dpa	DAR
chr9-1337034-1337667	4.07301e-12	-0.94378	0.081	0.177	8.37949e-07	casp10	0	Superficial_Epithelial_0dpa_vs_1dpa	DAR
chr4-20905254-20906441	4.15609e-12	-1.2348	0.051	0.128	8.5504e-07	nav3	0	Superficial_Epithelial_0dpa_vs_1dpa	DAR
chr14-38814814-38815850	4.18006e-12	0.579707	0.115	0.088	8.59972e-07	spdl1	0	Superficial_Epithelial_0dpa_vs_1dpa	DAR
chr1-57128968-57130236	4.18581e-12	-0.951394	0.083	0.172	8.61155e-07	rac1l	0	Superficial_Epithelial_0dpa_vs_1dpa	DAR
chr3-4455499-4457344	4.37111e-12	-0.960973	0.095	0.203	8.99277e-07	trim35-3	0	Superficial_Epithelial_0dpa_vs_1dpa	DAR
chr24-3397884-3398919	4.43446e-12	-0.998041	0.072	0.156	9.1231e-07	nck1b	0	Superficial_Epithelial_0dpa_vs_1dpa	DAR
chr4-77993474-77995184	4.52798e-12	0.498429	0.171	0.141	9.31551e-07	si:dkey-238k10.2	0	Superficial_Epithelial_0dpa_vs_1dpa	DAR
chr7-20767256-20769504	4.69878e-12	-1.12897	0.066	0.16	9.6669e-07	cyb5d1	2249	Superficial_Epithelial_0dpa_vs_1dpa	DAR
chr20-23561264-23562614	4.81261e-12	-0.940443	0.097	0.213	9.90107e-07	palld	0	Superficial_Epithelial_0dpa_vs_1dpa	DAR
chr2-739729-740625	4.99379e-12	-1.35496	0.04	0.111	1.02738e-06	CU861459.1	6864	Superficial_Epithelial_0dpa_vs_1dpa	DAR
chr2-24536043-24537315	5.02077e-12	-1.19329	0.063	0.156	1.03293e-06	angptl4	0	Superficial_Epithelial_0dpa_vs_1dpa	DAR
chr9-41387405-41388074	5.05424e-12	0.551241	0.138	0.107	1.03982e-06	nab1b	0	Superficial_Epithelial_0dpa_vs_1dpa	DAR
chr20-16923404-16924594	5.14751e-12	-1.13871	0.056	0.126	1.05901e-06	psma6b	16636	Superficial_Epithelial_0dpa_vs_1dpa	DAR
chr22-26557209-26558493	5.22229e-12	-0.949849	0.091	0.199	1.07439e-06	glis2a	0	Superficial_Epithelial_0dpa_vs_1dpa	DAR
chr16-40429576-40430702	5.33834e-12	-0.768437	0.144	0.269	1.09827e-06	plekhf2	0	Superficial_Epithelial_0dpa_vs_1dpa	DAR
chr14-7781416-7783357	5.46958e-12	0.480787	0.115	0.098	1.12527e-06	sting1	0	Superficial_Epithelial_0dpa_vs_1dpa	DAR
chr1-56751044-56751865	5.52618e-12	0.388358	0.242	0.207	1.13691e-06	CABZ01049361.1	3670	Superficial_Epithelial_0dpa_vs_1dpa	DAR
chr7-53851633-53852753	5.63058e-12	-1.18361	0.053	0.129	1.15839e-06	neo1a	0	Superficial_Epithelial_0dpa_vs_1dpa	DAR
chr2-55561844-55562596	5.83566e-12	0.351914	0.233	0.216	1.20058e-06	ap1m1	69528	Superficial_Epithelial_0dpa_vs_1dpa	DAR
chr13-14064697-14065664	5.84012e-12	-1.11319	0.061	0.147	1.2015e-06	atrn	0	Superficial_Epithelial_0dpa_vs_1dpa	DAR
chr24-2254682-2255489	5.85736e-12	-1.19729	0.055	0.137	1.20505e-06	cul2	28469	Superficial_Epithelial_0dpa_vs_1dpa	DAR
chr17-31343526-31344659	5.92852e-12	-0.633041	0.199	0.342	1.21969e-06	bahd1	0	Superficial_Epithelial_0dpa_vs_1dpa	DAR
chr2-41775997-41777333	5.99524e-12	-0.960098	0.089	0.188	1.23341e-06	SSBP4	52509	Superficial_Epithelial_0dpa_vs_1dpa	DAR
chr3-22392493-22393478	6.20474e-12	0.439229	0.132	0.117	1.27651e-06	arhgap27l	0	Superficial_Epithelial_0dpa_vs_1dpa	DAR
chr9-8358690-8359181	6.28305e-12	-1.30756	0.041	0.106	1.29262e-06	si:dkey-90l23.2	5371	Superficial_Epithelial_0dpa_vs_1dpa	DAR
chr23-1163831-1164546	6.49873e-12	-0.808164	0.118	0.231	1.337e-06	CABZ01079873.1	11772	Superficial_Epithelial_0dpa_vs_1dpa	DAR
chr3-43658832-43659733	6.5163e-12	0.433924	0.156	0.135	1.34061e-06	snn	0	Superficial_Epithelial_0dpa_vs_1dpa	DAR
chr17-23460175-23460889	6.61159e-12	-0.716064	0.126	0.231	1.36022e-06	ankrd1a	2082	Superficial_Epithelial_0dpa_vs_1dpa	DAR
chr13-47269521-47270502	6.81336e-12	-1.19523	0.047	0.123	1.40173e-06	bcl2l11	90601	Superficial_Epithelial_0dpa_vs_1dpa	DAR
chr12-27109735-27110864	6.85022e-12	-0.953425	0.08	0.176	1.40931e-06	ttll6	0	Superficial_Epithelial_0dpa_vs_1dpa	DAR
chr11-11474975-11477436	7.0308e-12	-0.863899	0.111	0.229	1.44646e-06	krt94	3117	Superficial_Epithelial_0dpa_vs_1dpa	DAR
chr20-7703325-7704025	7.24512e-12	-1.07845	0.06	0.14	1.49055e-06	CR848049.1	54999	Superficial_Epithelial_0dpa_vs_1dpa	DAR
chr2-7756546-7757671	7.38265e-12	0.583958	0.101	0.081	1.51885e-06	b3gnt5b	0	Superficial_Epithelial_0dpa_vs_1dpa	DAR
chr7-68298391-68299945	7.52033e-12	0.347533	0.257	0.243	1.54717e-06	zfhx3	0	Superficial_Epithelial_0dpa_vs_1dpa	DAR
chr1-25173634-25174432	7.65287e-12	-0.814258	0.115	0.227	1.57444e-06	tmem154	0	Superficial_Epithelial_0dpa_vs_1dpa	DAR
chr4-76377333-76378723	7.71281e-12	-0.775928	0.121	0.233	1.58677e-06	zgc:123107	0	Superficial_Epithelial_0dpa_vs_1dpa	DAR
chr15-28288689-28289425	7.90774e-12	-1.45822	0.033	0.103	1.62687e-06	myo1cb	0	Superficial_Epithelial_0dpa_vs_1dpa	DAR
chr24-34328249-34329200	7.96387e-12	-0.937619	0.09	0.194	1.63842e-06	agap3	0	Superficial_Epithelial_0dpa_vs_1dpa	DAR
chr6-40422225-40423591	8.40197e-12	0.431721	0.185	0.156	1.72855e-06	si:dkey-28n18.9	0	Superficial_Epithelial_0dpa_vs_1dpa	DAR
chr24-4038362-4039455	8.50809e-12	0.587934	0.125	0.093	1.75039e-06	CT583636.1	20000	Superficial_Epithelial_0dpa_vs_1dpa	DAR
chr23-15046577-15048342	8.53284e-12	-0.790633	0.13	0.25	1.75548e-06	si:ch211-218g4.2	0	Superficial_Epithelial_0dpa_vs_1dpa	DAR
chr18-22192234-22193103	8.72695e-12	-1.09109	0.068	0.17	1.79541e-06	ripor1	0	Superficial_Epithelial_0dpa_vs_1dpa	DAR
chr1-44198310-44198905	8.81516e-12	-0.990773	0.082	0.175	1.81356e-06	ctnnd1	0	Superficial_Epithelial_0dpa_vs_1dpa	DAR
chr9-1686209-1687257	8.90724e-12	-0.84222	0.104	0.206	1.8325e-06	nfe2l2a	2840	Superficial_Epithelial_0dpa_vs_1dpa	DAR
chr5-44900458-44901121	9.10098e-12	-0.936959	0.085	0.172	1.87236e-06	kank1a	0	Superficial_Epithelial_0dpa_vs_1dpa	DAR
chr18-3052234-3053947	9.31672e-12	-1.24811	0.045	0.124	1.91675e-06	rps3	0	Superficial_Epithelial_0dpa_vs_1dpa	DAR
chr5-39717147-39719127	9.46775e-12	-0.996018	0.075	0.16	1.94782e-06	rasgef1ba	0	Superficial_Epithelial_0dpa_vs_1dpa	DAR
chr3-41672876-41673639	9.56645e-12	-1.163	0.048	0.123	1.96812e-06	BX324110.1	0	Superficial_Epithelial_0dpa_vs_1dpa	DAR
chr3-27637579-27639761	9.65605e-12	0.529225	0.133	0.105	1.98656e-06	usp7	0	Superficial_Epithelial_0dpa_vs_1dpa	DAR
chr18-25166793-25167803	9.76791e-12	-0.879629	0.098	0.2	2.00957e-06	slco3a1	0	Superficial_Epithelial_0dpa_vs_1dpa	DAR
chr14-28315099-28317006	9.84094e-12	-1.00977	0.075	0.173	2.0246e-06	mid2	0	Superficial_Epithelial_0dpa_vs_1dpa	DAR
chr7-19203895-19205316	9.85613e-12	-0.963587	0.076	0.163	2.02772e-06	dock11	0	Superficial_Epithelial_0dpa_vs_1dpa	DAR
chr21-42858029-42858854	1.00381e-11	-0.769279	0.131	0.247	2.06515e-06	zmp:0000001268	11246	Superficial_Epithelial_0dpa_vs_1dpa	DAR
chr5-43460281-43461218	1.01678e-11	-1.07756	0.063	0.146	2.09184e-06	rhobtb4	0	Superficial_Epithelial_0dpa_vs_1dpa	DAR
chr19-48239349-48239872	1.03805e-11	-0.963875	0.077	0.165	2.13559e-06	CU693379.1	11400	Superficial_Epithelial_0dpa_vs_1dpa	DAR
chr12-17787304-17788278	1.03871e-11	-1.00186	0.077	0.169	2.13696e-06	tecpr1a	6005	Superficial_Epithelial_0dpa_vs_1dpa	DAR
chr24-39264115-39265357	1.07932e-11	-0.746829	0.138	0.26	2.22052e-06		0	Superficial_Epithelial_0dpa_vs_1dpa	DAR
chr8-52229080-52230531	1.10625e-11	0.417736	0.166	0.152	2.27591e-06	tcf7l1b	0	Superficial_Epithelial_0dpa_vs_1dpa	DAR
chr3-35626432-35627125	1.12105e-11	-1.23267	0.045	0.119	2.30635e-06	traf7	0	Superficial_Epithelial_0dpa_vs_1dpa	DAR
chr23-29376076-29377373	1.13279e-11	-1.31606	0.037	0.103	2.33051e-06	sst6	0	Superficial_Epithelial_0dpa_vs_1dpa	DAR
chr18-8485800-8488151	1.13982e-11	-1.35964	0.038	0.109	2.34498e-06	FRMD4A	15218	Superficial_Epithelial_0dpa_vs_1dpa	DAR
chr14-16409831-16410990	1.20017e-11	-0.903235	0.101	0.21	2.46913e-06	maml1	0	Superficial_Epithelial_0dpa_vs_1dpa	DAR
chr7-55473889-55475106	1.2079e-11	0.271847	0.292	0.294	2.48503e-06	piezo1	19482	Superficial_Epithelial_0dpa_vs_1dpa	DAR
chr21-17784276-17785393	1.2267e-11	0.464995	0.179	0.149	2.52372e-06	rxraa	0	Superficial_Epithelial_0dpa_vs_1dpa	DAR
chr15-46347176-46347892	1.23493e-11	-1.24367	0.041	0.102	2.54065e-06	si:ch1073-340i21.2	0	Superficial_Epithelial_0dpa_vs_1dpa	DAR
chr8-49341537-49342455	1.25446e-11	-0.857097	0.099	0.202	2.58083e-06	plp2	0	Superficial_Epithelial_0dpa_vs_1dpa	DAR
chr6-29748330-29749346	1.25733e-11	0.381565	0.216	0.191	2.58674e-06	ptmaa	4794	Superficial_Epithelial_0dpa_vs_1dpa	DAR
chr2-2071032-2071806	1.26967e-11	-1.17686	0.054	0.139	2.61212e-06	slc22a23	0	Superficial_Epithelial_0dpa_vs_1dpa	DAR
chr3-39675186-39677372	1.3254e-11	-0.966822	0.075	0.163	2.72677e-06	epn2	0	Superficial_Epithelial_0dpa_vs_1dpa	DAR
chr10-28260868-28262067	1.32612e-11	-1.04091	0.067	0.155	2.72825e-06	CU207388.1	8072	Superficial_Epithelial_0dpa_vs_1dpa	DAR
chr19-5374065-5374447	1.4076e-11	0.652497	0.106	0.075	2.89588e-06	krt17	1492	Superficial_Epithelial_0dpa_vs_1dpa	DAR
chr3-48992953-48994060	1.41567e-11	-0.994474	0.073	0.158	2.91248e-06	BX769173.1	0	Superficial_Epithelial_0dpa_vs_1dpa	DAR
chr4-1800705-1802016	1.42532e-11	0.420723	0.136	0.122	2.93233e-06	nudt4b	0	Superficial_Epithelial_0dpa_vs_1dpa	DAR
chr3-23273474-23275013	1.4284e-11	-1.03532	0.065	0.15	2.93868e-06	ppp1r9ba	0	Superficial_Epithelial_0dpa_vs_1dpa	DAR
chr19-25975647-25976499	1.474e-11	0.45173	0.171	0.141	3.0325e-06	jarid2b	0	Superficial_Epithelial_0dpa_vs_1dpa	DAR
chr9-10708955-10710353	1.48292e-11	-1.22496	0.055	0.143	3.05084e-06	CR522881.1	0	Superficial_Epithelial_0dpa_vs_1dpa	DAR
chr11-13596936-13597998	1.51541e-11	-0.69368	0.162	0.286	3.11769e-06	si:ch211-1a19.2	7624	Superficial_Epithelial_0dpa_vs_1dpa	DAR
chr13-27277402-27278573	1.51894e-11	-1.3439	0.039	0.104	3.12494e-06	rin2	0	Superficial_Epithelial_0dpa_vs_1dpa	DAR
chr7-36145657-36146793	1.57128e-11	0.275494	0.303	0.296	3.23262e-06	fto	0	Superficial_Epithelial_0dpa_vs_1dpa	DAR
chr6-8034422-8035685	1.59838e-11	-1.22673	0.053	0.133	3.28837e-06	palm3	0	Superficial_Epithelial_0dpa_vs_1dpa	DAR
chr12-33359107-33359957	1.66063e-11	-1.07943	0.068	0.159	3.41644e-06	slc16a3	0	Superficial_Epithelial_0dpa_vs_1dpa	DAR
chr4-27451846-27452538	1.69087e-11	-1.24598	0.041	0.108	3.47865e-06	tafa5a	53431	Superficial_Epithelial_0dpa_vs_1dpa	DAR
chr23-10181292-10182584	1.73756e-11	0.285317	0.281	0.272	3.57471e-06	krt5	3833	Superficial_Epithelial_0dpa_vs_1dpa	DAR
chr7-66042117-66042895	1.77523e-11	0.533239	0.139	0.105	3.65221e-06	arntl1b	5206	Superficial_Epithelial_0dpa_vs_1dpa	DAR
chr11-6522318-6523696	1.77587e-11	0.310152	0.246	0.24	3.65354e-06	CU062501.2	9675	Superficial_Epithelial_0dpa_vs_1dpa	DAR
chr2-20922881-20924025	1.79213e-11	-1.11838	0.064	0.151	3.68699e-06	ptgs2a	0	Superficial_Epithelial_0dpa_vs_1dpa	DAR
chr21-14717514-14718473	1.81394e-11	-1.02084	0.074	0.164	3.73185e-06	arrdc1b	0	Superficial_Epithelial_0dpa_vs_1dpa	DAR
chr21-15226257-15226966	1.84403e-11	-1.15448	0.045	0.111	3.79376e-06	sfswap	0	Superficial_Epithelial_0dpa_vs_1dpa	DAR
chr15-2656857-2657909	1.85313e-11	-1.04316	0.083	0.187	3.81248e-06	cldna	0	Superficial_Epithelial_0dpa_vs_1dpa	DAR
chr4-8684067-8686173	1.891e-11	-0.621723	0.201	0.341	3.89039e-06	adipor2	0	Superficial_Epithelial_0dpa_vs_1dpa	DAR
chr22-29796843-29797833	1.90018e-11	-1.34688	0.035	0.1	3.90927e-06	BX649294.1	0	Superficial_Epithelial_0dpa_vs_1dpa	DAR
chr8-17018420-17020339	1.93231e-11	0.261677	0.367	0.364	3.97539e-06	pde4d	0	Superficial_Epithelial_0dpa_vs_1dpa	DAR
chr19-12088745-12089657	1.96968e-11	-1.35599	0.039	0.109	4.05227e-06	rnf19a	10161	Superficial_Epithelial_0dpa_vs_1dpa	DAR
chr1-55074969-55075776	1.97388e-11	0.344162	0.242	0.236	4.06091e-06	lgalsla	5020	Superficial_Epithelial_0dpa_vs_1dpa	DAR
chr24-24742373-24745625	1.99529e-11	-0.879674	0.095	0.192	4.10496e-06	pde7a	0	Superficial_Epithelial_0dpa_vs_1dpa	DAR
chr22-31658002-31659515	2.00828e-11	0.558842	0.108	0.086	4.13167e-06	lsm3	1448	Superficial_Epithelial_0dpa_vs_1dpa	DAR
chr21-38852671-38854782	2.06066e-11	-0.733686	0.145	0.26	4.23944e-06	tlr22	0	Superficial_Epithelial_0dpa_vs_1dpa	DAR
chr8-51354253-51354960	2.07391e-11	0.555434	0.116	0.089	4.2667e-06	chmp7	0	Superficial_Epithelial_0dpa_vs_1dpa	DAR
chr5-24364391-24367170	2.08275e-11	-1.05153	0.064	0.15	4.28489e-06	znf703	30706	Superficial_Epithelial_0dpa_vs_1dpa	DAR
chr24-1530828-1532159	2.12348e-11	-0.708717	0.158	0.291	4.36868e-06	BX323074.1	94867	Superficial_Epithelial_0dpa_vs_1dpa	DAR
chr5-36214465-36215007	2.14502e-11	-0.998275	0.082	0.183	4.413e-06	efnb1	56008	Superficial_Epithelial_0dpa_vs_1dpa	DAR
chr7-36181910-36183150	2.1547e-11	0.387927	0.182	0.16	4.4329e-06	fto	0	Superficial_Epithelial_0dpa_vs_1dpa	DAR
chr24-4732007-4732721	2.16583e-11	0.391169	0.203	0.173	4.45581e-06	cpb1	22669	Superficial_Epithelial_0dpa_vs_1dpa	DAR
chr18-16162807-16164554	2.17225e-11	-1.05538	0.066	0.156	4.46902e-06	slc6a15	0	Superficial_Epithelial_0dpa_vs_1dpa	DAR
chr3-39375578-39377052	2.20555e-11	-0.880018	0.108	0.217	4.53753e-06	CU464118.1	0	Superficial_Epithelial_0dpa_vs_1dpa	DAR
chr14-32932425-32933768	2.26979e-11	-1.04031	0.082	0.189	4.66969e-06	lnx2b	0	Superficial_Epithelial_0dpa_vs_1dpa	DAR
chr18-8398482-8399266	2.33811e-11	-1.10673	0.054	0.127	4.81025e-06	BEND7	0	Superficial_Epithelial_0dpa_vs_1dpa	DAR
chr10-26677436-26678516	2.34003e-11	-0.768933	0.123	0.229	4.81418e-06	si:ch73-52f15.5	0	Superficial_Epithelial_0dpa_vs_1dpa	DAR
chr3-24691727-24692519	2.34286e-11	-1.1616	0.053	0.124	4.82001e-06	slc25a17	0	Superficial_Epithelial_0dpa_vs_1dpa	DAR
chr5-31201957-31202706	2.3564e-11	-1.13983	0.052	0.121	4.84788e-06	atp2a3	0	Superficial_Epithelial_0dpa_vs_1dpa	DAR
chr6-52946998-52948516	2.36968e-11	-1.03682	0.073	0.16	4.87518e-06	uba7	0	Superficial_Epithelial_0dpa_vs_1dpa	DAR
chr11-6529905-6531082	2.41465e-11	0.449979	0.142	0.121	4.9677e-06	CU062501.2	17262	Superficial_Epithelial_0dpa_vs_1dpa	DAR
chr24-39038783-39040098	2.45351e-11	-0.894451	0.089	0.188	5.04765e-06	capn15	0	Superficial_Epithelial_0dpa_vs_1dpa	DAR
chr8-17292576-17293206	2.45657e-11	-1.22355	0.05	0.129	5.05395e-06	BX465215.1	40221	Superficial_Epithelial_0dpa_vs_1dpa	DAR
chr1-55193392-55194436	2.48966e-11	-1.17531	0.047	0.114	5.12203e-06	mri1	0	Superficial_Epithelial_0dpa_vs_1dpa	DAR
chr8-50153534-50154307	2.49037e-11	0.465072	0.149	0.123	5.12349e-06	entpd4	0	Superficial_Epithelial_0dpa_vs_1dpa	DAR
chr24-14262212-14263097	2.51356e-11	0.58804	0.126	0.092	5.17119e-06	ncoa2	0	Superficial_Epithelial_0dpa_vs_1dpa	DAR
chr2-42471862-42473532	2.57221e-11	-1.0448	0.066	0.153	5.29186e-06	esyt2a	0	Superficial_Epithelial_0dpa_vs_1dpa	DAR
chr7-33829222-33830523	2.58743e-11	0.491139	0.118	0.099	5.32318e-06	uacab	0	Superficial_Epithelial_0dpa_vs_1dpa	DAR
chr2-51728895-51729879	2.69033e-11	-1.07237	0.06	0.136	5.53487e-06	si:ch211-9d9.1	7217	Superficial_Epithelial_0dpa_vs_1dpa	DAR
chr12-25960808-25961541	2.69537e-11	-0.908497	0.097	0.2	5.54525e-06	bmpr1ab	0	Superficial_Epithelial_0dpa_vs_1dpa	DAR
chr19-35405287-35405951	2.71825e-11	-1.39994	0.036	0.1	5.59231e-06	rnf19b	4467	Superficial_Epithelial_0dpa_vs_1dpa	DAR
chr2-23371111-23372138	2.7779e-11	0.465765	0.132	0.115	5.71504e-06	ivns1abpb	7262	Superficial_Epithelial_0dpa_vs_1dpa	DAR
chr10-13028636-13030107	2.78854e-11	-1.03047	0.065	0.144	5.73693e-06	lpar1	0	Superficial_Epithelial_0dpa_vs_1dpa	DAR
chr2-32245065-32246173	2.8581e-11	0.316813	0.262	0.257	5.88002e-06	fam49ba	0	Superficial_Epithelial_0dpa_vs_1dpa	DAR
chr13-31383008-31383894	2.87551e-11	0.539787	0.105	0.082	5.91584e-06	zdhhc16a	0	Superficial_Epithelial_0dpa_vs_1dpa	DAR
chr11-23663871-23665025	2.90888e-11	-0.843642	0.099	0.197	5.9845e-06	pik3c2b	0	Superficial_Epithelial_0dpa_vs_1dpa	DAR
chr10-17395226-17395986	2.9168e-11	0.333885	0.267	0.25	6.00079e-06	sppl3	0	Superficial_Epithelial_0dpa_vs_1dpa	DAR
chr2-25153959-25154778	2.92657e-11	-0.999473	0.073	0.164	6.0209e-06	CR786576.2	1063	Superficial_Epithelial_0dpa_vs_1dpa	DAR
chr15-21663025-21664322	2.93671e-11	-0.991004	0.071	0.158	6.04176e-06	sorl1	0	Superficial_Epithelial_0dpa_vs_1dpa	DAR
chr23-18421196-18422240	2.9661e-11	0.344333	0.239	0.218	6.10221e-06	fam120c	5323	Superficial_Epithelial_0dpa_vs_1dpa	DAR
chr8-43305481-43307003	2.99048e-11	-0.648879	0.186	0.326	6.15238e-06	rflna	33991	Superficial_Epithelial_0dpa_vs_1dpa	DAR
chr11-18618326-18619653	2.99826e-11	-0.882767	0.095	0.2	6.16837e-06	ncoa3	0	Superficial_Epithelial_0dpa_vs_1dpa	DAR
chr15-37598036-37599405	3.00195e-11	0.507567	0.124	0.098	6.17597e-06	lin37	0	Superficial_Epithelial_0dpa_vs_1dpa	DAR
chr25-17423266-17425731	3.02756e-11	-0.811172	0.126	0.247	6.22865e-06	elmo3	0	Superficial_Epithelial_0dpa_vs_1dpa	DAR
chr5-66205885-66207290	3.05207e-11	-0.963289	0.08	0.165	6.27909e-06	coq2	0	Superficial_Epithelial_0dpa_vs_1dpa	DAR
chr6-15839276-15840371	3.05854e-11	-0.931752	0.093	0.204	6.2924e-06	iqca1	0	Superficial_Epithelial_0dpa_vs_1dpa	DAR
chr15-39110431-39111397	3.1161e-11	-1.2283	0.045	0.115	6.41081e-06	robo2	0	Superficial_Epithelial_0dpa_vs_1dpa	DAR
chr19-3355004-3355532	3.176e-11	0.453477	0.162	0.134	6.53406e-06	edn1	20897	Superficial_Epithelial_0dpa_vs_1dpa	DAR
chr7-65755666-65757663	3.17839e-11	0.411775	0.161	0.15	6.53897e-06	FP016235.1	0	Superficial_Epithelial_0dpa_vs_1dpa	DAR
chr14-14628017-14629107	3.2177e-11	-1.22496	0.044	0.108	6.61983e-06	znf185	0	Superficial_Epithelial_0dpa_vs_1dpa	DAR
chr24-7418981-7419797	3.30685e-11	0.378332	0.182	0.168	6.80325e-06	kmt2ca	0	Superficial_Epithelial_0dpa_vs_1dpa	DAR
chr17-31792137-31793056	3.31304e-11	-1.40849	0.04	0.107	6.81598e-06	arhgap5	0	Superficial_Epithelial_0dpa_vs_1dpa	DAR
chr25-16522830-16523428	3.32541e-11	-1.05834	0.063	0.146	6.84142e-06	si:ch211-266k8.4	0	Superficial_Epithelial_0dpa_vs_1dpa	DAR
chr20-34094388-34095276	3.5957e-11	-0.827995	0.111	0.224	7.3975e-06	pdcb	3647	Superficial_Epithelial_0dpa_vs_1dpa	DAR
chr14-28346388-28347190	3.61861e-11	-1.1404	0.055	0.132	7.44464e-06	mid2	0	Superficial_Epithelial_0dpa_vs_1dpa	DAR
chr23-33417306-33418096	3.70444e-11	0.581802	0.108	0.079	7.62121e-06	rapgef3	0	Superficial_Epithelial_0dpa_vs_1dpa	DAR
chr9-3054041-3054625	3.79429e-11	0.269501	0.304	0.307	7.80607e-06	BX957292.1	397	Superficial_Epithelial_0dpa_vs_1dpa	DAR
chr14-20892686-20893838	4.00805e-11	-1.17387	0.054	0.135	8.24584e-06	lygl1	0	Superficial_Epithelial_0dpa_vs_1dpa	DAR
chr17-40941706-40942439	4.04932e-11	-0.691887	0.146	0.262	8.33075e-06	si:dkey-16j16.4	0	Superficial_Epithelial_0dpa_vs_1dpa	DAR
chr1-49399789-49400368	4.09915e-11	-0.729216	0.135	0.252	8.43327e-06	gsk3bb	0	Superficial_Epithelial_0dpa_vs_1dpa	DAR
chr18-44396991-44398054	4.15027e-11	-0.819105	0.114	0.228	8.53844e-06	aplp2	0	Superficial_Epithelial_0dpa_vs_1dpa	DAR
chr16-54308251-54308898	4.1676e-11	-1.00731	0.063	0.143	8.57408e-06	ethe1	0	Superficial_Epithelial_0dpa_vs_1dpa	DAR
chr15-23890925-23891761	4.16879e-11	0.640779	0.104	0.076	8.57652e-06	usp32	0	Superficial_Epithelial_0dpa_vs_1dpa	DAR
chr5-24088830-24089479	4.19427e-11	-1.34855	0.036	0.102	8.62896e-06	tp53	0	Superficial_Epithelial_0dpa_vs_1dpa	DAR
chr6-4222923-4223805	4.22535e-11	-0.736064	0.133	0.244	8.6929e-06	trak2	0	Superficial_Epithelial_0dpa_vs_1dpa	DAR
chr25-34537673-34539765	4.38435e-11	-1.1259	0.06	0.149	9.02e-06	BX323824.1	25195	Superficial_Epithelial_0dpa_vs_1dpa	DAR
chr9-48902892-48903665	4.40575e-11	-1.16216	0.049	0.124	9.06403e-06	cers6	0	Superficial_Epithelial_0dpa_vs_1dpa	DAR
chr9-30036109-30037237	4.53617e-11	-1.42267	0.032	0.105	9.33236e-06	dcbld2	0	Superficial_Epithelial_0dpa_vs_1dpa	DAR
chr18-388112-388916	4.76555e-11	-0.89886	0.087	0.174	9.80426e-06	GARRE1	0	Superficial_Epithelial_0dpa_vs_1dpa	DAR
chr2-776440-777342	4.82077e-11	-0.840838	0.102	0.202	9.91787e-06	CU861459.1	43575	Superficial_Epithelial_0dpa_vs_1dpa	DAR
chr11-16465065-16465938	4.87792e-11	-1.15967	0.06	0.15	1.00354e-05	lrig1	69108	Superficial_Epithelial_0dpa_vs_1dpa	DAR
chr12-44674163-44675341	4.89245e-11	-1.13577	0.057	0.141	1.00653e-05	dock1	0	Superficial_Epithelial_0dpa_vs_1dpa	DAR
chr13-24941636-24942772	4.92758e-11	-1.05105	0.061	0.133	1.01376e-05	adka	0	Superficial_Epithelial_0dpa_vs_1dpa	DAR
chr1-51819797-51821737	4.96259e-11	-1.11726	0.06	0.137	1.02096e-05	BX548032.3	0	Superficial_Epithelial_0dpa_vs_1dpa	DAR
chr8-31280442-31281393	4.98143e-11	0.490396	0.123	0.103	1.02484e-05	unm_hu7912	26073	Superficial_Epithelial_0dpa_vs_1dpa	DAR
chr8-10995238-10996304	5.00493e-11	-0.772159	0.123	0.235	1.02967e-05	trim33	0	Superficial_Epithelial_0dpa_vs_1dpa	DAR
chr19-360681-361386	5.16323e-11	-1.15048	0.057	0.141	1.06224e-05	vps72a	4647	Superficial_Epithelial_0dpa_vs_1dpa	DAR
chr2-34125351-34126632	5.16629e-11	-0.999762	0.067	0.154	1.06287e-05	klhl20	0	Superficial_Epithelial_0dpa_vs_1dpa	DAR
chr7-37788406-37790536	5.19444e-11	-1.08819	0.066	0.148	1.06866e-05	adcy7	0	Superficial_Epithelial_0dpa_vs_1dpa	DAR
chr6-23708755-23709614	5.28543e-11	-1.05947	0.056	0.125	1.08738e-05	pik3r6a	3296	Superficial_Epithelial_0dpa_vs_1dpa	DAR
chr13-17055865-17057245	5.30027e-11	-1.00496	0.064	0.141	1.09043e-05	lrmda	0	Superficial_Epithelial_0dpa_vs_1dpa	DAR
chr16-20383618-20384409	5.35446e-11	-1.13561	0.052	0.124	1.10158e-05	chn2	0	Superficial_Epithelial_0dpa_vs_1dpa	DAR
chr7-21875017-21877036	5.36797e-11	-1.12767	0.046	0.109	1.10436e-05	mettl3	0	Superficial_Epithelial_0dpa_vs_1dpa	DAR
chr7-30753089-30753987	5.43272e-11	-0.60284	0.178	0.309	1.11768e-05	mtmr10	0	Superficial_Epithelial_0dpa_vs_1dpa	DAR
chr3-33443045-33443966	5.52381e-11	-0.788514	0.115	0.224	1.13643e-05	gtpbp1	0	Superficial_Epithelial_0dpa_vs_1dpa	DAR
chr20-716932-718405	5.7352e-11	0.284674	0.294	0.286	1.17991e-05	myo6a	0	Superficial_Epithelial_0dpa_vs_1dpa	DAR
chr12-15720866-15722787	5.89872e-11	-1.26511	0.044	0.118	1.21356e-05	svild	0	Superficial_Epithelial_0dpa_vs_1dpa	DAR
chr5-20232255-20233386	5.91444e-11	-1.02748	0.076	0.174	1.21679e-05	ssh1a	22181	Superficial_Epithelial_0dpa_vs_1dpa	DAR
chr20-23742257-23744112	6.65384e-11	-1.14067	0.057	0.145	1.36891e-05	sh3rf1	0	Superficial_Epithelial_0dpa_vs_1dpa	DAR
chr18-20400028-20401018	6.68326e-11	-0.767439	0.12	0.229	1.37496e-05	kif23	34802	Superficial_Epithelial_0dpa_vs_1dpa	DAR
chr7-905284-905783	6.77059e-11	-0.941633	0.07	0.15	1.39293e-05	CABZ01112025.1	13787	Superficial_Epithelial_0dpa_vs_1dpa	DAR
chr23-25686049-25688378	7.10567e-11	-0.8605	0.118	0.23	1.46186e-05	lrp1ab	0	Superficial_Epithelial_0dpa_vs_1dpa	DAR
chr20-15555787-15556955	7.21254e-11	0.30826	0.229	0.233	1.48385e-05	jun	1180	Superficial_Epithelial_0dpa_vs_1dpa	DAR
chr6-33385022-33386070	7.34551e-11	-1.22701	0.039	0.104	1.51121e-05	CR933860.1	57263	Superficial_Epithelial_0dpa_vs_1dpa	DAR
chr2-26674592-26675611	7.5727e-11	-1.18721	0.046	0.117	1.55795e-05	asph	0	Superficial_Epithelial_0dpa_vs_1dpa	DAR
chr12-44224168-44224922	7.59387e-11	0.606913	0.102	0.077	1.5623e-05	si:ch73-329n5.1	0	Superficial_Epithelial_0dpa_vs_1dpa	DAR
chr24-25785138-25786635	7.73351e-11	-1.04876	0.072	0.162	1.59103e-05	klhl24b	0	Superficial_Epithelial_0dpa_vs_1dpa	DAR
chr17-12996926-12998149	7.88468e-11	0.339251	0.202	0.19	1.62213e-05	prorp	0	Superficial_Epithelial_0dpa_vs_1dpa	DAR
chr5-48875877-48876319	7.92369e-11	-1.36152	0.039	0.111	1.63016e-05	adgrv1	0	Superficial_Epithelial_0dpa_vs_1dpa	DAR
chr11-34953846-34954935	7.94557e-11	-0.981742	0.067	0.146	1.63466e-05	gnai2a	0	Superficial_Epithelial_0dpa_vs_1dpa	DAR
chr19-43650105-43650892	8.00324e-11	-0.795349	0.11	0.213	1.64652e-05	si:ch211-193k19.2	3345	Superficial_Epithelial_0dpa_vs_1dpa	DAR
chr9-12574488-12576383	8.09809e-11	-1.24206	0.048	0.119	1.66604e-05	igf2bp2a	0	Superficial_Epithelial_0dpa_vs_1dpa	DAR
chr25-28408965-28410120	8.14445e-11	-1.65148	0.034	0.105	1.67557e-05	ptprz1a	0	Superficial_Epithelial_0dpa_vs_1dpa	DAR
chr4-17663757-17665042	8.19742e-11	-1.1511	0.044	0.106	1.68647e-05	BX890572.2	0	Superficial_Epithelial_0dpa_vs_1dpa	DAR
chr6-23710880-23712267	8.51348e-11	-0.93661	0.068	0.144	1.75149e-05	pik3r6a	643	Superficial_Epithelial_0dpa_vs_1dpa	DAR
chr3-41555126-41556050	8.52502e-11	0.566048	0.105	0.084	1.75387e-05	card11	2631	Superficial_Epithelial_0dpa_vs_1dpa	DAR
chr3-14061314-14062167	8.77587e-11	0.360691	0.181	0.173	1.80548e-05	nfil3-6	37525	Superficial_Epithelial_0dpa_vs_1dpa	DAR
chr24-6548351-6549446	8.79408e-11	-0.952807	0.086	0.189	1.80922e-05	arhgap21a	0	Superficial_Epithelial_0dpa_vs_1dpa	DAR
chr5-14417462-14418754	8.81112e-11	-1.25794	0.042	0.112	1.81273e-05	kat6a	0	Superficial_Epithelial_0dpa_vs_1dpa	DAR
chr2-10291355-10292406	9.00074e-11	0.45874	0.142	0.119	1.85174e-05	gng12a	0	Superficial_Epithelial_0dpa_vs_1dpa	DAR
chr3-26986586-26987595	9.13096e-11	-0.878311	0.092	0.19	1.87853e-05	nubp1	7792	Superficial_Epithelial_0dpa_vs_1dpa	DAR
chr7-25055152-25055816	9.19039e-11	-1.02367	0.063	0.143	1.89076e-05	ppp2r5b	0	Superficial_Epithelial_0dpa_vs_1dpa	DAR
chr19-4161891-4162800	9.27844e-11	-1.17639	0.044	0.113	1.90887e-05	TRAPPC9	0	Superficial_Epithelial_0dpa_vs_1dpa	DAR
chr20-22108170-22108940	9.36866e-11	0.585882	0.113	0.082	1.92743e-05	clocka	0	Superficial_Epithelial_0dpa_vs_1dpa	DAR
chr9-21792714-21794341	9.39912e-11	0.309969	0.251	0.259	1.9337e-05	rev1	0	Superficial_Epithelial_0dpa_vs_1dpa	DAR
chr3-31935543-31936193	9.42236e-11	0.358565	0.243	0.215	1.93848e-05	lin7b	0	Superficial_Epithelial_0dpa_vs_1dpa	DAR
chr24-14345538-14347413	9.46014e-11	-1.08223	0.059	0.141	1.94625e-05	ncoa2	0	Superficial_Epithelial_0dpa_vs_1dpa	DAR
chr3-50206588-50209453	9.4791e-11	-1.02172	0.064	0.138	1.95015e-05	epn3a	0	Superficial_Epithelial_0dpa_vs_1dpa	DAR
chr17-35359969-35361520	9.48573e-11	-0.939783	0.087	0.176	1.95152e-05	rsad2	0	Superficial_Epithelial_0dpa_vs_1dpa	DAR
chr14-4143070-4143844	9.66996e-11	-1.17605	0.05	0.118	1.98942e-05	casp3b	0	Superficial_Epithelial_0dpa_vs_1dpa	DAR
chr3-39612004-39613573	9.71473e-11	-0.85376	0.105	0.203	1.99863e-05	prpsap2	0	Superficial_Epithelial_0dpa_vs_1dpa	DAR
chr13-2264621-2265928	9.73602e-11	-1.12167	0.054	0.126	2.00301e-05	lrrc1	0	Superficial_Epithelial_0dpa_vs_1dpa	DAR
chr25-5949386-5952192	9.76077e-11	-0.761212	0.105	0.192	2.0081e-05	nuak1b	0	Superficial_Epithelial_0dpa_vs_1dpa	DAR
chr20-27641239-27642220	9.96443e-11	-1.01961	0.079	0.175	2.05e-05	mthfd1a	4551	Superficial_Epithelial_0dpa_vs_1dpa	DAR
chr25-23498471-23499383	1.00614e-10	-1.13181	0.052	0.121	2.06996e-05	CU024870.2	3022	Superficial_Epithelial_0dpa_vs_1dpa	DAR
chr23-843794-845072	1.01731e-10	0.34125	0.216	0.197	2.09294e-05	rbm10	0	Superficial_Epithelial_0dpa_vs_1dpa	DAR
chr22-31593419-31594759	1.02549e-10	0.465475	0.115	0.094	2.10975e-05	lsm3	66204	Superficial_Epithelial_0dpa_vs_1dpa	DAR
chr11-44294666-44296466	1.02634e-10	-0.675533	0.186	0.342	2.11151e-05	gnb4b	0	Superficial_Epithelial_0dpa_vs_1dpa	DAR
chr11-25284733-25285315	1.0327e-10	0.423864	0.17	0.141	2.1246e-05	cyldb	0	Superficial_Epithelial_0dpa_vs_1dpa	DAR
chr12-48579542-48580476	1.03767e-10	-0.864191	0.097	0.198	2.13482e-05	SYDE1	1111	Superficial_Epithelial_0dpa_vs_1dpa	DAR
chr22-12918366-12919370	1.05001e-10	0.34636	0.212	0.2	2.16021e-05	mfsd6a	0	Superficial_Epithelial_0dpa_vs_1dpa	DAR
chr18-16267207-16268109	1.07876e-10	-1.12108	0.054	0.131	2.21935e-05	CT027551.1	0	Superficial_Epithelial_0dpa_vs_1dpa	DAR
chr15-24814478-24815539	1.0825e-10	-1.12776	0.048	0.111	2.22705e-05	gosr1	0	Superficial_Epithelial_0dpa_vs_1dpa	DAR
chr16-38161671-38162366	1.10506e-10	-1.34915	0.035	0.101	2.27347e-05	pi4kb	0	Superficial_Epithelial_0dpa_vs_1dpa	DAR
chr10-27062055-27063388	1.1574e-10	0.380463	0.158	0.138	2.38115e-05	dre-mir-192	0	Superficial_Epithelial_0dpa_vs_1dpa	DAR
chr2-31826850-31828527	1.16757e-10	0.362347	0.194	0.174	2.40206e-05	ranbp9	0	Superficial_Epithelial_0dpa_vs_1dpa	DAR
chr5-37283581-37284784	1.17028e-10	0.441863	0.131	0.108	2.40764e-05	si:dkey-17o15.2	0	Superficial_Epithelial_0dpa_vs_1dpa	DAR
chr11-42295563-42296431	1.17596e-10	-1.07438	0.062	0.141	2.41932e-05	slmapa	8153	Superficial_Epithelial_0dpa_vs_1dpa	DAR
chr12-34029804-34030882	1.20931e-10	-0.77859	0.114	0.22	2.48795e-05	timp2a	0	Superficial_Epithelial_0dpa_vs_1dpa	DAR
chr10-25628198-25629589	1.21592e-10	0.37559	0.18	0.162	2.50154e-05	tiam1a	0	Superficial_Epithelial_0dpa_vs_1dpa	DAR
chr16-35700042-35701528	1.23703e-10	-1.06823	0.055	0.126	2.54496e-05	map7d1a	0	Superficial_Epithelial_0dpa_vs_1dpa	DAR
chr17-16097128-16098014	1.24619e-10	-1.11898	0.056	0.138	2.5638e-05	znf395a	0	Superficial_Epithelial_0dpa_vs_1dpa	DAR
chr11-30392416-30393298	1.25214e-10	0.359956	0.192	0.167	2.57605e-05	map4k3a	0	Superficial_Epithelial_0dpa_vs_1dpa	DAR
chr24-29602384-29602945	1.29966e-10	-0.84744	0.089	0.179	2.67381e-05	vav3a	16301	Superficial_Epithelial_0dpa_vs_1dpa	DAR
chr2-15143910-15145252	1.3375e-10	-0.643612	0.172	0.305	2.75166e-05	arhgap29b	0	Superficial_Epithelial_0dpa_vs_1dpa	DAR
chr6-39648972-39649811	1.37185e-10	0.325314	0.222	0.217	2.82233e-05	larp4ab	0	Superficial_Epithelial_0dpa_vs_1dpa	DAR
chr17-21101719-21103328	1.38025e-10	0.311488	0.177	0.168	2.83961e-05	entpd6	0	Superficial_Epithelial_0dpa_vs_1dpa	DAR
chr5-24822987-24824200	1.4328e-10	-1.05982	0.066	0.157	2.94772e-05	gas2l1	0	Superficial_Epithelial_0dpa_vs_1dpa	DAR
chr5-36205498-36207426	1.47415e-10	-0.951935	0.074	0.163	3.03279e-05	efnb1	63589	Superficial_Epithelial_0dpa_vs_1dpa	DAR
chr2-18088912-18089894	1.48501e-10	-0.888776	0.083	0.176	3.05515e-05	BX511224.1	66146	Superficial_Epithelial_0dpa_vs_1dpa	DAR
chr1-46587771-46588903	1.48748e-10	-0.716542	0.135	0.258	3.06023e-05	mcf2la	0	Superficial_Epithelial_0dpa_vs_1dpa	DAR
chr11-11888883-11891826	1.50428e-10	0.271775	0.243	0.248	3.09478e-05	si:ch211-69b7.6	0	Superficial_Epithelial_0dpa_vs_1dpa	DAR
chr16-16983079-16983718	1.53041e-10	-1.08803	0.05	0.117	3.14855e-05	rpl18	0	Superficial_Epithelial_0dpa_vs_1dpa	DAR
chr10-45247700-45249942	1.55434e-10	-0.580254	0.208	0.35	3.19778e-05	zmiz2	0	Superficial_Epithelial_0dpa_vs_1dpa	DAR
chr3-45686817-45687860	1.66006e-10	0.276654	0.211	0.217	3.41528e-05	gpr146	0	Superficial_Epithelial_0dpa_vs_1dpa	DAR
chr11-13629553-13630741	1.66249e-10	-0.771221	0.122	0.234	3.42028e-05	si:ch211-1a19.3	0	Superficial_Epithelial_0dpa_vs_1dpa	DAR
chr20-30815768-30816574	1.66431e-10	-1.02616	0.068	0.15	3.42402e-05	nhsl1b	0	Superficial_Epithelial_0dpa_vs_1dpa	DAR
chr19-37115980-37117762	1.67175e-10	-0.836417	0.111	0.216	3.43932e-05	cx30.9	784	Superficial_Epithelial_0dpa_vs_1dpa	DAR
chr8-7781532-7781947	1.67716e-10	-1.22882	0.043	0.107	3.45046e-05	tfe3a	0	Superficial_Epithelial_0dpa_vs_1dpa	DAR
chr4-20172316-20174573	1.72539e-10	-0.792095	0.133	0.262	3.54969e-05	sinup	1569	Superficial_Epithelial_0dpa_vs_1dpa	DAR
chr22-36578460-36579060	1.73902e-10	0.540707	0.126	0.095	3.57771e-05	armc9	0	Superficial_Epithelial_0dpa_vs_1dpa	DAR
chr10-18851423-18852353	1.74514e-10	-1.13942	0.054	0.13	3.59031e-05	ppp2r2ab	25008	Superficial_Epithelial_0dpa_vs_1dpa	DAR
chr10-209207-210707	1.76264e-10	-1.14444	0.058	0.139	3.62631e-05	psmg1	0	Superficial_Epithelial_0dpa_vs_1dpa	DAR
chr19-4108338-4109476	1.77387e-10	-1.02307	0.072	0.162	3.64942e-05	fhl3b	0	Superficial_Epithelial_0dpa_vs_1dpa	DAR
chr11-602969-603985	1.80521e-10	0.266304	0.281	0.277	3.7139e-05	CABZ01069324.1	1660	Superficial_Epithelial_0dpa_vs_1dpa	DAR
chr18-15781149-15782043	1.80585e-10	-1.00355	0.072	0.16	3.71522e-05	ube2na	0	Superficial_Epithelial_0dpa_vs_1dpa	DAR
chr25-34813126-34813994	1.92545e-10	-1.07997	0.058	0.136	3.96126e-05	adat1	0	Superficial_Epithelial_0dpa_vs_1dpa	DAR
chr6-56299953-56300501	1.93558e-10	-1.3124	0.04	0.104	3.98211e-05	tfap2c	120245	Superficial_Epithelial_0dpa_vs_1dpa	DAR
chr7-16980350-16981158	1.94265e-10	-1.02054	0.07	0.16	3.99665e-05	nav2a	0	Superficial_Epithelial_0dpa_vs_1dpa	DAR
chr21-39566204-39567383	1.96077e-10	0.272532	0.255	0.261	4.03393e-05	dynll2b	0	Superficial_Epithelial_0dpa_vs_1dpa	DAR
chr14-39231672-39232425	1.98704e-10	-1.19795	0.044	0.111	4.08797e-05	LO018296.2	15467	Superficial_Epithelial_0dpa_vs_1dpa	DAR
chr23-651995-653489	1.98947e-10	-0.718828	0.138	0.251	4.09299e-05	BX323461.1	0	Superficial_Epithelial_0dpa_vs_1dpa	DAR
chr14-8177779-8178900	1.98958e-10	-1.27285	0.043	0.121	4.0932e-05	psd2	0	Superficial_Epithelial_0dpa_vs_1dpa	DAR
chr18-26912648-26913563	2.01763e-10	0.603965	0.106	0.078	4.1509e-05	tspan3a	0	Superficial_Epithelial_0dpa_vs_1dpa	DAR
chr6-44023292-44025388	2.03041e-10	-0.685544	0.144	0.266	4.1772e-05	rybpb	0	Superficial_Epithelial_0dpa_vs_1dpa	DAR
chr13-45007654-45008714	2.03576e-10	-1.03625	0.06	0.137	4.18821e-05	khdrbs1a	1242	Superficial_Epithelial_0dpa_vs_1dpa	DAR
chr21-45635449-45637607	2.04603e-10	-0.768894	0.14	0.267	4.20934e-05	irf1b	2131	Superficial_Epithelial_0dpa_vs_1dpa	DAR
chr10-10073602-10074531	2.0476e-10	-0.817258	0.094	0.184	4.21257e-05	strbp	54807	Superficial_Epithelial_0dpa_vs_1dpa	DAR
chr16-7434986-7435979	2.05486e-10	0.298427	0.287	0.282	4.2275e-05	prdm1a	0	Superficial_Epithelial_0dpa_vs_1dpa	DAR
chr9-12999938-13000818	2.11119e-10	0.410543	0.157	0.143	4.3434e-05	bmpr2b	0	Superficial_Epithelial_0dpa_vs_1dpa	DAR
chr13-17753148-17754408	2.1145e-10	-1.17491	0.044	0.11	4.35021e-05	march8	0	Superficial_Epithelial_0dpa_vs_1dpa	DAR
chr5-39709762-39710841	2.12817e-10	-1.09156	0.057	0.137	4.37832e-05	rasgef1ba	0	Superficial_Epithelial_0dpa_vs_1dpa	DAR
chr11-44128343-44130557	2.12933e-10	-1.20075	0.041	0.107	4.38071e-05	FO704721.1	4793	Superficial_Epithelial_0dpa_vs_1dpa	DAR
chr3-31866072-31867055	2.14205e-10	0.458258	0.151	0.131	4.40688e-05	BX324157.2	0	Superficial_Epithelial_0dpa_vs_1dpa	DAR
chr13-22681833-22682348	2.18016e-10	0.415466	0.142	0.122	4.48529e-05	glud1a	0	Superficial_Epithelial_0dpa_vs_1dpa	DAR
chr6-25655218-25656288	2.20688e-10	-1.09806	0.045	0.107	4.54026e-05	BX248113.1	151851	Superficial_Epithelial_0dpa_vs_1dpa	DAR
chr9-19384313-19385333	2.25537e-10	-1.15599	0.045	0.105	4.64002e-05	slc37a1	0	Superficial_Epithelial_0dpa_vs_1dpa	DAR
chr15-35170038-35171517	2.26016e-10	-1.23822	0.043	0.111	4.64987e-05	agfg1a	0	Superficial_Epithelial_0dpa_vs_1dpa	DAR
chr8-43619952-43621760	2.2784e-10	0.34974	0.212	0.199	4.6874e-05	ncor2	45016	Superficial_Epithelial_0dpa_vs_1dpa	DAR
chr13-23007021-23008321	2.28115e-10	0.286178	0.301	0.312	4.69305e-05	hk1	0	Superficial_Epithelial_0dpa_vs_1dpa	DAR
chr16-38330095-38331114	2.3228e-10	-1.22599	0.046	0.121	4.77874e-05	cdc42se1	0	Superficial_Epithelial_0dpa_vs_1dpa	DAR
chr18-30432520-30433671	2.34946e-10	-0.638084	0.173	0.296	4.8336e-05	gse1	0	Superficial_Epithelial_0dpa_vs_1dpa	DAR
chr12-1530163-1531003	2.35821e-10	-0.979689	0.078	0.167	4.85159e-05	usp22	4111	Superficial_Epithelial_0dpa_vs_1dpa	DAR
chr14-1367202-1368063	2.37429e-10	-0.929877	0.073	0.153	4.88468e-05	tbc1d9	0	Superficial_Epithelial_0dpa_vs_1dpa	DAR
chr5-31587472-31587896	2.38398e-10	-1.19185	0.043	0.106	4.90461e-05	si:dkey-220k22.1	0	Superficial_Epithelial_0dpa_vs_1dpa	DAR
chr5-54436122-54437240	2.40122e-10	-1.09461	0.055	0.13	4.94009e-05	traf2b	0	Superficial_Epithelial_0dpa_vs_1dpa	DAR
chr14-21939395-21940064	2.40333e-10	0.38008	0.182	0.156	4.94443e-05	zgc:113229	0	Superficial_Epithelial_0dpa_vs_1dpa	DAR
chr24-24781166-24782273	2.40742e-10	-0.541511	0.234	0.38	4.95284e-05	pde7a	0	Superficial_Epithelial_0dpa_vs_1dpa	DAR
chr8-37104140-37106206	2.42081e-10	-0.863828	0.102	0.212	4.98039e-05	zgc:162200	0	Superficial_Epithelial_0dpa_vs_1dpa	DAR
chr7-18728804-18731002	2.4226e-10	-0.73952	0.135	0.25	4.98406e-05	C7H4orf54	0	Superficial_Epithelial_0dpa_vs_1dpa	DAR
chr20-51305100-51306023	2.44938e-10	-0.810571	0.105	0.21	5.03916e-05	nfkbie	0	Superficial_Epithelial_0dpa_vs_1dpa	DAR
chr2-32015515-32018773	2.45169e-10	-0.531913	0.263	0.42	5.04392e-05	mycb	0	Superficial_Epithelial_0dpa_vs_1dpa	DAR
chr21-15668200-15669981	2.48145e-10	0.566184	0.112	0.09	5.10514e-05	mmp11b	0	Superficial_Epithelial_0dpa_vs_1dpa	DAR
chr5-58665025-58666498	2.52638e-10	0.418902	0.117	0.102	5.19758e-05	zgc:194948	0	Superficial_Epithelial_0dpa_vs_1dpa	DAR
chr1-47077015-47078332	2.57139e-10	-0.90607	0.092	0.199	5.29018e-05	itsn1	0	Superficial_Epithelial_0dpa_vs_1dpa	DAR
chr5-57655972-57656391	2.59623e-10	-1.02869	0.057	0.126	5.34128e-05	mia	879	Superficial_Epithelial_0dpa_vs_1dpa	DAR
chr21-23010543-23012356	2.60566e-10	-0.999603	0.074	0.163	5.36069e-05	rb1	0	Superficial_Epithelial_0dpa_vs_1dpa	DAR
chr8-20767396-20768420	2.65834e-10	-1.13461	0.051	0.118	5.46907e-05	nfic	0	Superficial_Epithelial_0dpa_vs_1dpa	DAR
chr22-37564142-37565784	2.66453e-10	-0.776998	0.122	0.238	5.48179e-05	fxr1	0	Superficial_Epithelial_0dpa_vs_1dpa	DAR
chr25-21911771-21912798	2.66884e-10	0.34949	0.193	0.175	5.49066e-05	dynlrb2	3126	Superficial_Epithelial_0dpa_vs_1dpa	DAR
chr22-10525088-10525989	2.68218e-10	0.309468	0.281	0.258	5.5181e-05	ippk	0	Superficial_Epithelial_0dpa_vs_1dpa	DAR
chr21-32499076-32499751	2.703e-10	-1.11404	0.059	0.138	5.56095e-05	CR735104.1	0	Superficial_Epithelial_0dpa_vs_1dpa	DAR
chr5-42916899-42919149	2.71486e-10	-1.11472	0.06	0.141	5.58534e-05	rufy3	0	Superficial_Epithelial_0dpa_vs_1dpa	DAR
chr5-31217097-31218460	2.74176e-10	-0.839592	0.124	0.242	5.64068e-05	atp2a3	0	Superficial_Epithelial_0dpa_vs_1dpa	DAR
chr9-40007409-40008973	2.76724e-10	0.33855	0.178	0.166	5.69309e-05	ikzf2	0	Superficial_Epithelial_0dpa_vs_1dpa	DAR
chr6-57424886-57425925	2.80966e-10	-0.753865	0.11	0.199	5.78037e-05	znfx1	0	Superficial_Epithelial_0dpa_vs_1dpa	DAR
[truncated: 11,537 more rows]

## Sheet: Table S3B
Supplementary Table S3. Differentially accessible regions identified between stages within each major cell type
B. stage DARs in IE
region	p_val	avg_log2FC	pct.1	pct.2	p_val_adj	comparison	distance	compare	category
chr1-1503986-1504737	0	-3.14296	0.033	0.253	0	dre-mir-459	70745	Intermediate_Epithelial_0dpa_vs_1dpa	DAR
chr1-18305432-18306276	0	-5.52301	0.004	0.164	0	CR392335.1	0	Intermediate_Epithelial_0dpa_vs_1dpa	DAR
chr1-21607525-21608937	0	-3.6297	0.024	0.256	0	zcchc7	1533	Intermediate_Epithelial_0dpa_vs_1dpa	DAR
chr10-1228075-1229160	0	-3.13979	0.048	0.323	0	pdlim5b	0	Intermediate_Epithelial_0dpa_vs_1dpa	DAR
chr10-9000902-9001775	0	-4.70135	0.008	0.186	0	arl15b	4798	Intermediate_Epithelial_0dpa_vs_1dpa	DAR
chr11-39480579-39481267	0	-5.40794	0.005	0.176	0	CR847998.1	156472	Intermediate_Epithelial_0dpa_vs_1dpa	DAR
chr12-42709554-42710534	0	-5.2775	0.005	0.19	0	LO017793.1	64579	Intermediate_Epithelial_0dpa_vs_1dpa	DAR
chr13-21828950-21830410	0	-4.06711	0.016	0.208	0	zswim8	0	Intermediate_Epithelial_0dpa_vs_1dpa	DAR
chr13-46155295-46155929	0	-1.73173	0.144	0.394	0	marcksl1a	21548	Intermediate_Epithelial_0dpa_vs_1dpa	DAR
chr14-20578159-20579048	0	-3.98048	0.016	0.201	0	aff2	0	Intermediate_Epithelial_0dpa_vs_1dpa	DAR
chr15-62201-64458	0	-1.75457	0.152	0.411	0	AXL	0	Intermediate_Epithelial_0dpa_vs_1dpa	DAR
chr15-39647455-39648058	0	5.04675	0.207	0.007	0	robo1	0	Intermediate_Epithelial_0dpa_vs_1dpa	DAR
chr15-44789100-44789807	0	-5.72466	0.005	0.234	0	gria4a	0	Intermediate_Epithelial_0dpa_vs_1dpa	DAR
chr15-46901484-46903036	0	-3.2815	0.03	0.231	0	zgc:153039	0	Intermediate_Epithelial_0dpa_vs_1dpa	DAR
chr17-27332895-27334997	0	-2.67224	0.051	0.254	0	si:ch1073-358c10.1	0	Intermediate_Epithelial_0dpa_vs_1dpa	DAR
chr17-41033892-41035084	0	-4.09874	0.016	0.222	0	rbks	0	Intermediate_Epithelial_0dpa_vs_1dpa	DAR
chr18-3204250-3206114	0	-4.9018	0.008	0.191	0	pak1	0	Intermediate_Epithelial_0dpa_vs_1dpa	DAR
chr18-5400325-5401349	0	-2.49889	0.06	0.276	0	CABZ01084603.1	7657	Intermediate_Epithelial_0dpa_vs_1dpa	DAR
chr18-8408701-8410424	0	-3.77405	0.018	0.215	0	prpf18	182	Intermediate_Epithelial_0dpa_vs_1dpa	DAR
chr18-15030955-15032243	0	-3.18802	0.032	0.243	0	btbd11b	0	Intermediate_Epithelial_0dpa_vs_1dpa	DAR
chr18-26479619-26480432	0	-4.41069	0.009	0.179	0	FRMD5	0	Intermediate_Epithelial_0dpa_vs_1dpa	DAR
chr18-50325779-50327104	0	-4.99178	0.008	0.205	0	insyn1	0	Intermediate_Epithelial_0dpa_vs_1dpa	DAR
chr19-1784849-1787095	0	-3.80439	0.028	0.309	0	ptk2aa	3701	Intermediate_Epithelial_0dpa_vs_1dpa	DAR
chr19-1801044-1802077	0	-3.46554	0.035	0.305	0	ptk2aa	0	Intermediate_Epithelial_0dpa_vs_1dpa	DAR
chr19-5803223-5804266	0	-3.81894	0.018	0.201	0	si:ch211-264f5.8	0	Intermediate_Epithelial_0dpa_vs_1dpa	DAR
chr19-11092899-11094758	0	-3.93269	0.017	0.204	0	arhgef1a	0	Intermediate_Epithelial_0dpa_vs_1dpa	DAR
chr19-13902736-13903629	0	-5.11435	0.005	0.161	0	stx12	1438	Intermediate_Epithelial_0dpa_vs_1dpa	DAR
chr19-29052276-29053000	0	-2.69225	0.049	0.256	0	CR925763.1	105864	Intermediate_Epithelial_0dpa_vs_1dpa	DAR
chr20-3243748-3244867	0	-3.04096	0.038	0.253	0	rps6kc1	0	Intermediate_Epithelial_0dpa_vs_1dpa	DAR
chr20-40117747-40120076	0	-4.76586	0.008	0.178	0	nkain2	0	Intermediate_Epithelial_0dpa_vs_1dpa	DAR
chr21-5458992-5461476	0	-2.66872	0.065	0.308	0	ly6m2	10853	Intermediate_Epithelial_0dpa_vs_1dpa	DAR
chr21-22945961-22947367	0	-2.86733	0.046	0.286	0	dub	0	Intermediate_Epithelial_0dpa_vs_1dpa	DAR
chr22-11629261-11629701	0	-4.29356	0.012	0.198	0	dpp4	0	Intermediate_Epithelial_0dpa_vs_1dpa	DAR
chr23-31689793-31690873	0	-4.52408	0.013	0.207	0	sgk1	0	Intermediate_Epithelial_0dpa_vs_1dpa	DAR
chr23-32921934-32923052	0	-4.36701	0.01	0.179	0	plxna2	0	Intermediate_Epithelial_0dpa_vs_1dpa	DAR
chr23-40912755-40913483	0	-4.64138	0.013	0.291	0	LO017845.1	0	Intermediate_Epithelial_0dpa_vs_1dpa	DAR
chr23-45998533-45999530	0	-3.95636	0.015	0.202	0	SYDE2	3328	Intermediate_Epithelial_0dpa_vs_1dpa	DAR
chr24-7458573-7459754	0	-2.80027	0.044	0.257	0	kmt2ca	0	Intermediate_Epithelial_0dpa_vs_1dpa	DAR
chr24-24045976-24046821	0	2.61808	0.284	0.05	0	abcc13	0	Intermediate_Epithelial_0dpa_vs_1dpa	DAR
chr24-36613560-36614658	0	-5.16512	0.007	0.195	0	CABZ01055365.1	19683	Intermediate_Epithelial_0dpa_vs_1dpa	DAR
chr3-2158483-2159444	0	-4.02754	0.014	0.192	0	CR933791.2	41450	Intermediate_Epithelial_0dpa_vs_1dpa	DAR
chr3-30723200-30724043	0	-4.67526	0.008	0.182	0	shank1	0	Intermediate_Epithelial_0dpa_vs_1dpa	DAR
chr4-11370501-11371803	0	-2.92583	0.042	0.252	0	sema3aa	2010	Intermediate_Epithelial_0dpa_vs_1dpa	DAR
chr5-1763474-1764888	0	-1.99638	0.122	0.385	0	mcc	0	Intermediate_Epithelial_0dpa_vs_1dpa	DAR
chr5-30486728-30487700	0	-3.0338	0.036	0.239	0	phldb1a	0	Intermediate_Epithelial_0dpa_vs_1dpa	DAR
chr6-491001-492747	0	-4.21831	0.013	0.215	0	LO017974.1	0	Intermediate_Epithelial_0dpa_vs_1dpa	DAR
chr6-1167180-1168220	0	-3.31075	0.028	0.215	0	txnrd3	0	Intermediate_Epithelial_0dpa_vs_1dpa	DAR
chr6-36033582-36034686	0	-4.04054	0.015	0.19	0	CU137680.1	81093	Intermediate_Epithelial_0dpa_vs_1dpa	DAR
chr6-54967376-54968282	0	-4.43639	0.011	0.2	0	nav1b	0	Intermediate_Epithelial_0dpa_vs_1dpa	DAR
chr6-55616030-55616904	0	-5.12295	0.005	0.169	0	slc12a5a	30606	Intermediate_Epithelial_0dpa_vs_1dpa	DAR
chr6-59789876-59790814	0	-5.82992	0.004	0.182	0	caskb	17862	Intermediate_Epithelial_0dpa_vs_1dpa	DAR
chr8-18178472-18179321	0	-6.29278	0.002	0.174	0	glis1b	12794	Intermediate_Epithelial_0dpa_vs_1dpa	DAR
chr8-24850770-24851511	0	-2.99219	0.05	0.321	0	slc6a17	3088	Intermediate_Epithelial_0dpa_vs_1dpa	DAR
chr9-24388494-24390018	0	-4.3905	0.01	0.197	0	tmeff2a	0	Intermediate_Epithelial_0dpa_vs_1dpa	DAR
chr9-25892242-25894078	0	2.7149	0.283	0.048	0	gtdc1	0	Intermediate_Epithelial_0dpa_vs_1dpa	DAR
chr9-28383180-28385487	0	-3.81081	0.02	0.215	0	klf7b	0	Intermediate_Epithelial_0dpa_vs_1dpa	DAR
chr11-44414464-44415143	0	-3.37807	0.024	0.211	0	gnb4b	0	Intermediate_Epithelial_0dpa_vs_1dpa	DAR
chr15-25610016-25611274	0	-3.66052	0.017	0.194	0	taok1a	0	Intermediate_Epithelial_0dpa_vs_1dpa	DAR
chr16-77682-78387	0	-2.7452	0.045	0.237	0	sox4b	6573	Intermediate_Epithelial_0dpa_vs_1dpa	DAR
chr4-11041596-11042913	0	-5.05617	0.005	0.16	0	mettl25	0	Intermediate_Epithelial_0dpa_vs_1dpa	DAR
chr23-23464256-23465614	0	-3.52717	0.021	0.192	0	agrn	20243	Intermediate_Epithelial_0dpa_vs_1dpa	DAR
chr15-17369750-17370486	0	-3.22349	0.027	0.21	0	vmp1	0	Intermediate_Epithelial_0dpa_vs_1dpa	DAR
chr16-26726218-26727234	0	-4.12919	0.013	0.173	0	rnf41l	0	Intermediate_Epithelial_0dpa_vs_1dpa	DAR
chr24-25163758-25164760	0	-5.08891	0.005	0.158	0	phldb2b	0	Intermediate_Epithelial_0dpa_vs_1dpa	DAR
chr6-27842308-27843355	0	-4.58654	0.008	0.166	7.30578e-307	rab6ba	0	Intermediate_Epithelial_0dpa_vs_1dpa	DAR
chr13-8228492-8230158	0	-3.18909	0.027	0.21	2.12853e-306	si:ch211-250c4.4	0	Intermediate_Epithelial_0dpa_vs_1dpa	DAR
chr23-37296787-37297944	0	-4.30078	0.01	0.171	1.00895e-304	CR762407.2	0	Intermediate_Epithelial_0dpa_vs_1dpa	DAR
chr7-28949506-28950699	0	-4.41618	0.009	0.168	1.16048e-304	dok4	0	Intermediate_Epithelial_0dpa_vs_1dpa	DAR
chr18-22747208-22748438	3.54272e-307	-2.79264	0.044	0.234	7.28851e-302	hsf4	0	Intermediate_Epithelial_0dpa_vs_1dpa	DAR
chr24-41006929-41008022	1.28297e-305	-3.47941	0.02	0.197	2.63948e-300	scn5lab	0	Intermediate_Epithelial_0dpa_vs_1dpa	DAR
chr1-1458367-1459573	3.97267e-305	-2.79996	0.042	0.232	8.17306e-300	runx1	56063	Intermediate_Epithelial_0dpa_vs_1dpa	DAR
chr15-16950669-16951777	9.29463e-305	-2.87338	0.036	0.223	1.9122e-299	hip1	0	Intermediate_Epithelial_0dpa_vs_1dpa	DAR
chr20-42623732-42625051	1.17354e-304	-4.42281	0.008	0.164	2.41434e-299	igf2r	0	Intermediate_Epithelial_0dpa_vs_1dpa	DAR
chr17-49789832-49791087	5.25957e-303	-5.50774	0.004	0.145	1.08206e-297	col12a1a	0	Intermediate_Epithelial_0dpa_vs_1dpa	DAR
chr4-12924448-12925137	3.09197e-302	-3.28852	0.024	0.195	6.36116e-297	lemd3	0	Intermediate_Epithelial_0dpa_vs_1dpa	DAR
chr15-19127846-19128731	9.43682e-302	-3.2346	0.023	0.197	1.94146e-296	arhgap32a	0	Intermediate_Epithelial_0dpa_vs_1dpa	DAR
chr5-34851412-34852654	1.23283e-301	-2.63897	0.044	0.246	2.53633e-296	arhgef28a	0	Intermediate_Epithelial_0dpa_vs_1dpa	DAR
chr16-215415-216774	5.75023e-299	-3.61904	0.021	0.183	1.18301e-293	nrsn1	4964	Intermediate_Epithelial_0dpa_vs_1dpa	DAR
chr19-25950235-25951394	7.14584e-299	-5.43596	0.005	0.144	1.47013e-293	jarid2b	19605	Intermediate_Epithelial_0dpa_vs_1dpa	DAR
chr21-21229613-21230625	8.67406e-298	-3.6518	0.016	0.177	1.78453e-292	rictorb	0	Intermediate_Epithelial_0dpa_vs_1dpa	DAR
chr13-11563722-11564896	5.02046e-297	-4.17695	0.01	0.164	1.03287e-291	desi2	0	Intermediate_Epithelial_0dpa_vs_1dpa	DAR
chr25-36005530-36007123	7.25228e-297	-2.49604	0.056	0.247	1.49203e-291	rbl2	3691	Intermediate_Epithelial_0dpa_vs_1dpa	DAR
chr18-15045564-15046514	5.80164e-296	-5.14659	0.005	0.147	1.19358e-290	btbd11b	0	Intermediate_Epithelial_0dpa_vs_1dpa	DAR
chr3-32797256-32798786	4.28794e-295	-3.71978	0.016	0.173	8.82167e-290	tbc1d10b	0	Intermediate_Epithelial_0dpa_vs_1dpa	DAR
chr18-15054788-15056341	2.54746e-294	-3.97879	0.012	0.167	5.24095e-289	btbd11b	0	Intermediate_Epithelial_0dpa_vs_1dpa	DAR
chr19-1192805-1193699	3.10875e-294	-6.73393	0.001	0.136	6.3957e-289	scrt1a	5876	Intermediate_Epithelial_0dpa_vs_1dpa	DAR
chr1-4513728-4514621	3.60681e-294	-4.29366	0.009	0.162	7.42036e-289	FO744838.1	83438	Intermediate_Epithelial_0dpa_vs_1dpa	DAR
chr6-59957440-59959305	1.16432e-293	-1.99674	0.099	0.309	2.39538e-288	nufip1	5816	Intermediate_Epithelial_0dpa_vs_1dpa	DAR
chr18-8583503-8584842	1.40373e-293	-2.87786	0.035	0.208	2.88791e-288	FRMD4A	3595	Intermediate_Epithelial_0dpa_vs_1dpa	DAR
chr11-407132-408642	4.17301e-293	-2.07459	0.089	0.3	8.58522e-288	znf831	2227	Intermediate_Epithelial_0dpa_vs_1dpa	DAR
chr9-31178565-31179498	5.39565e-293	-2.65824	0.046	0.232	1.11006e-287	clybl	0	Intermediate_Epithelial_0dpa_vs_1dpa	DAR
chr23-5941497-5942609	1.87564e-292	-4.18869	0.009	0.162	3.85879e-287	CABZ01026153.1	19032	Intermediate_Epithelial_0dpa_vs_1dpa	DAR
chr8-40071488-40073404	2.07681e-292	-2.66582	0.04	0.224	4.27267e-287	ggt1a	0	Intermediate_Epithelial_0dpa_vs_1dpa	DAR
chr3-35850735-35851571	6.3712e-292	-2.97722	0.031	0.211	1.31076e-286	suz12a	0	Intermediate_Epithelial_0dpa_vs_1dpa	DAR
chr12-48804779-48805604	1.47558e-291	-2.19489	0.074	0.282	3.03574e-286	ppifb	0	Intermediate_Epithelial_0dpa_vs_1dpa	DAR
chr6-56628222-56629283	2.15626e-291	-2.23603	0.069	0.281	4.43611e-286	cdh22	9404	Intermediate_Epithelial_0dpa_vs_1dpa	DAR
chr23-21330630-21331653	1.69625e-290	-4.29824	0.01	0.157	3.48972e-285	ubr4	0	Intermediate_Epithelial_0dpa_vs_1dpa	DAR
chr16-39293909-39294866	8.67137e-290	-3.90745	0.015	0.172	1.78398e-284	osbpl10b	0	Intermediate_Epithelial_0dpa_vs_1dpa	DAR
chr1-32043794-32045454	2.96083e-289	-2.88172	0.034	0.207	6.09137e-284	sts	6126	Intermediate_Epithelial_0dpa_vs_1dpa	DAR
chr1-16343441-16344431	1.0311e-288	-4.23057	0.011	0.159	2.12131e-283	fgf20a	48645	Intermediate_Epithelial_0dpa_vs_1dpa	DAR
chr15-44948760-44949590	1.99481e-286	-2.97957	0.029	0.205	4.10397e-281	pdgfd	0	Intermediate_Epithelial_0dpa_vs_1dpa	DAR
chr18-15039941-15041130	7.27281e-286	-5.66137	0.004	0.133	1.49625e-280	btbd11b	0	Intermediate_Epithelial_0dpa_vs_1dpa	DAR
chr5-9016262-9017484	1.49975e-285	-3.6736	0.016	0.172	3.08546e-280	tnksb	0	Intermediate_Epithelial_0dpa_vs_1dpa	DAR
chr23-30967694-30968686	1.97813e-285	-4.88941	0.006	0.146	4.06964e-280	si:ch211-197l9.2	0	Intermediate_Epithelial_0dpa_vs_1dpa	DAR
chr1-57326226-57327060	1.17759e-284	-5.17139	0.005	0.142	2.42269e-279	epn3b	4752	Intermediate_Epithelial_0dpa_vs_1dpa	DAR
chr2-34036034-34036960	1.84557e-283	-2.25508	0.066	0.259	3.79693e-278	eif2b3	0	Intermediate_Epithelial_0dpa_vs_1dpa	DAR
chr17-10520815-10521960	4.24945e-283	-4.41867	0.008	0.155	8.74248e-278	tyro3	0	Intermediate_Epithelial_0dpa_vs_1dpa	DAR
chr10-37089281-37090112	1.98021e-282	-3.01221	0.029	0.2	4.07392e-277	vezf1a	0	Intermediate_Epithelial_0dpa_vs_1dpa	DAR
chr3-36108122-36109766	4.40186e-282	-5.19953	0.004	0.142	9.05603e-277	rab11fip4a	0	Intermediate_Epithelial_0dpa_vs_1dpa	DAR
chr5-69490259-69492154	3.09653e-281	2.24123	0.298	0.066	6.37056e-276	psat1	0	Intermediate_Epithelial_0dpa_vs_1dpa	DAR
chr1-46818492-46819367	1.1162e-280	-3.60502	0.017	0.171	2.29637e-275	CU986305.1	8523	Intermediate_Epithelial_0dpa_vs_1dpa	DAR
chr1-43543935-43545019	8.65142e-280	-3.57812	0.017	0.171	1.77987e-274	suclg1	107460	Intermediate_Epithelial_0dpa_vs_1dpa	DAR
chr15-35549783-35551610	4.41741e-279	-1.58801	0.152	0.361	9.08803e-274	CR848683.2	0	Intermediate_Epithelial_0dpa_vs_1dpa	DAR
chr3-57683589-57684708	4.72657e-279	-3.01274	0.03	0.196	9.72407e-274	lgals3bpa	14537	Intermediate_Epithelial_0dpa_vs_1dpa	DAR
chr17-41015597-41016597	5.74991e-278	-2.78366	0.037	0.211	1.18294e-272	rbks	0	Intermediate_Epithelial_0dpa_vs_1dpa	DAR
chr16-28845010-28845820	7.97348e-278	-5.15428	0.004	0.138	1.6404e-272	syt11b	0	Intermediate_Epithelial_0dpa_vs_1dpa	DAR
chr19-25265824-25266575	1.25978e-277	-5.07731	0.005	0.14	2.59177e-272	rims3	0	Intermediate_Epithelial_0dpa_vs_1dpa	DAR
chr16-7482297-7483301	1.33483e-277	-3.2407	0.023	0.191	2.74617e-272	prdm1a	38908	Intermediate_Epithelial_0dpa_vs_1dpa	DAR
chr17-18961487-18962442	2.62825e-277	-6.43253	0.001	0.126	5.40716e-272	flrt2	54951	Intermediate_Epithelial_0dpa_vs_1dpa	DAR
chr13-33039965-33041492	4.25166e-277	3.45069	0.189	0.018	8.74702e-272	vti1b	0	Intermediate_Epithelial_0dpa_vs_1dpa	DAR
chr10-28620079-28620741	1.62048e-276	-2.38767	0.054	0.247	3.33384e-271	cblb	0	Intermediate_Epithelial_0dpa_vs_1dpa	DAR
chr20-19493755-19494438	3.31896e-276	-3.69872	0.014	0.167	6.82816e-271	BX276101.2	0	Intermediate_Epithelial_0dpa_vs_1dpa	DAR
chr24-22243023-22244941	3.74945e-276	-5.13596	0.005	0.137	7.71381e-271	ctnnd2a	0	Intermediate_Epithelial_0dpa_vs_1dpa	DAR
chr9-20449766-20451104	1.09291e-273	-3.8528	0.012	0.158	2.24846e-268	CR456628.1	13250	Intermediate_Epithelial_0dpa_vs_1dpa	DAR
chr14-2563268-2564143	1.42574e-273	-3.30001	0.019	0.182	2.9332e-268	fbxw11a	0	Intermediate_Epithelial_0dpa_vs_1dpa	DAR
chr13-36388751-36391872	1.8051e-273	-1.47829	0.175	0.385	3.71367e-268	actn1	0	Intermediate_Epithelial_0dpa_vs_1dpa	DAR
chr8-9060766-9061752	6.50215e-273	-3.73653	0.014	0.16	1.3377e-267	slc6a8	0	Intermediate_Epithelial_0dpa_vs_1dpa	DAR
chr23-29899583-29901166	8.38616e-273	-3.47768	0.019	0.168	1.7253e-267	CU695073.1	0	Intermediate_Epithelial_0dpa_vs_1dpa	DAR
chr5-32665290-32666578	1.34285e-272	-3.27506	0.024	0.18	2.76268e-267	CR376857.2	0	Intermediate_Epithelial_0dpa_vs_1dpa	DAR
chr23-42564677-42565679	1.62286e-271	-3.79373	0.015	0.163	3.33874e-266	CT997819.2	18851	Intermediate_Epithelial_0dpa_vs_1dpa	DAR
chr19-47584552-47585714	7.50592e-271	-4.55818	0.006	0.144	1.54421e-265	CABZ01071972.1	0	Intermediate_Epithelial_0dpa_vs_1dpa	DAR
chr15-19130991-19132030	4.53224e-269	-2.605	0.04	0.216	9.32428e-264	igsf9ba	0	Intermediate_Epithelial_0dpa_vs_1dpa	DAR
chr21-3083703-3084554	9.07017e-269	-2.49098	0.052	0.237	1.86602e-263	SHC3	8864	Intermediate_Epithelial_0dpa_vs_1dpa	DAR
chr7-63315275-63316347	1.71734e-267	-6.56589	0.001	0.122	3.53312e-262	pcdh7b	8540	Intermediate_Epithelial_0dpa_vs_1dpa	DAR
chr16-49053778-49054655	4.5134e-265	-4.04955	0.011	0.15	9.28551e-260	plcl2	34042	Intermediate_Epithelial_0dpa_vs_1dpa	DAR
chr2-33243088-33244255	4.84288e-265	2.00643	0.32	0.086	9.96335e-260	rnf220a	26347	Intermediate_Epithelial_0dpa_vs_1dpa	DAR
chr23-35596412-35597631	2.73145e-264	-4.26421	0.009	0.147	5.61947e-259	tmem18	44429	Intermediate_Epithelial_0dpa_vs_1dpa	DAR
chr18-8492209-8493654	6.84018e-264	-4.06569	0.01	0.149	1.40724e-258	FRMD4A	9715	Intermediate_Epithelial_0dpa_vs_1dpa	DAR
chr8-22766304-22767449	1.0323e-263	-4.17433	0.01	0.152	2.12378e-258	magixa	0	Intermediate_Epithelial_0dpa_vs_1dpa	DAR
chr8-29386344-29387079	3.13542e-263	-4.32826	0.008	0.143	6.45056e-258	grid2	0	Intermediate_Epithelial_0dpa_vs_1dpa	DAR
chr25-33573226-33573865	5.07451e-263	3.97611	0.159	0.011	1.04399e-257	CABZ01071677.1	155418	Intermediate_Epithelial_0dpa_vs_1dpa	DAR
chr3-21456062-21456839	9.06276e-262	3.1122	0.198	0.023	1.8645e-256	BX927078.1	0	Intermediate_Epithelial_0dpa_vs_1dpa	DAR
chr16-18766072-18767075	3.80468e-261	-2.25156	0.061	0.243	7.82745e-256	fhod3b	0	Intermediate_Epithelial_0dpa_vs_1dpa	DAR
chr14-367881-369070	8.44016e-261	-3.71073	0.014	0.158	1.73641e-255	FAT4	0	Intermediate_Epithelial_0dpa_vs_1dpa	DAR
chr18-34487887-34489242	1.05056e-260	-5.60816	0.003	0.127	2.16133e-255	kcnab1a	0	Intermediate_Epithelial_0dpa_vs_1dpa	DAR
chr18-48908896-48909600	1.3206e-259	-4.81616	0.006	0.137	2.7169e-254	ppp1r37	0	Intermediate_Epithelial_0dpa_vs_1dpa	DAR
chr23-31293574-31294826	1.98359e-259	-3.67763	0.015	0.161	4.08089e-254	phip	0	Intermediate_Epithelial_0dpa_vs_1dpa	DAR
chr7-69378971-69379923	2.73959e-259	-4.11195	0.01	0.148	5.63621e-254	ZNF821	0	Intermediate_Epithelial_0dpa_vs_1dpa	DAR
chr15-308916-310725	3.91796e-258	-3.52096	0.016	0.159	8.0605e-253	BX640522.2	18408	Intermediate_Epithelial_0dpa_vs_1dpa	DAR
chr4-14401775-14403390	1.94627e-257	-2.81821	0.031	0.186	4.00411e-252	BX571705.1	0	Intermediate_Epithelial_0dpa_vs_1dpa	DAR
chr3-15387273-15388062	3.12832e-257	-4.1028	0.01	0.143	6.43596e-252	sh2b1	0	Intermediate_Epithelial_0dpa_vs_1dpa	DAR
chr24-4165087-4166357	4.50147e-257	-2.48163	0.044	0.214	9.26096e-252	CU462914.1	8687	Intermediate_Epithelial_0dpa_vs_1dpa	DAR
chr1-1466082-1466862	2.42764e-256	-4.80769	0.005	0.133	4.99443e-251	runx1	63778	Intermediate_Epithelial_0dpa_vs_1dpa	DAR
chr8-10785646-10786976	2.94425e-255	3.22185	0.187	0.021	6.05727e-250	mapk13	36092	Intermediate_Epithelial_0dpa_vs_1dpa	DAR
chr24-9376625-9377738	7.45498e-255	-5.22305	0.004	0.125	1.53373e-249	si:ch211-285f17.1	0	Intermediate_Epithelial_0dpa_vs_1dpa	DAR
chr19-1645463-1646498	1.00385e-254	-3.55553	0.015	0.158	2.06524e-249	klhl7	12199	Intermediate_Epithelial_0dpa_vs_1dpa	DAR
chr16-38721176-38722127	1.06277e-254	-3.36243	0.019	0.168	2.18646e-249	emc2	0	Intermediate_Epithelial_0dpa_vs_1dpa	DAR
chr19-34631599-34632962	1.13189e-254	-3.75109	0.013	0.158	2.32865e-249	gabbr2	0	Intermediate_Epithelial_0dpa_vs_1dpa	DAR
chr7-39020171-39020944	4.25574e-254	-3.76416	0.012	0.153	8.75543e-249	dgkza	0	Intermediate_Epithelial_0dpa_vs_1dpa	DAR
chr23-20815443-20816732	6.34031e-254	-2.50639	0.042	0.214	1.3044e-248	zgc:154075	958	Intermediate_Epithelial_0dpa_vs_1dpa	DAR
chr7-55303245-55304307	1.77638e-253	-2.71784	0.038	0.199	3.65459e-248	ctu2	0	Intermediate_Epithelial_0dpa_vs_1dpa	DAR
chr4-83487-84721	3.10418e-253	-2.72103	0.038	0.201	6.38629e-248	lrp6	5326	Intermediate_Epithelial_0dpa_vs_1dpa	DAR
chr15-17375278-17378260	3.88937e-253	-4.6792	0.006	0.132	8.00168e-248	CR848791.3	0	Intermediate_Epithelial_0dpa_vs_1dpa	DAR
chr12-26793378-26793994	1.80407e-251	-4.3229	0.008	0.14	3.71155e-246	zeb1b	0	Intermediate_Epithelial_0dpa_vs_1dpa	DAR
chr20-9587067-9588614	4.22631e-251	-2.66193	0.037	0.196	8.69487e-246	zfp36l1b	6620	Intermediate_Epithelial_0dpa_vs_1dpa	DAR
chr17-1817605-1818852	5.28613e-251	-2.51044	0.045	0.216	1.08753e-245	CABZ01063203.1	96935	Intermediate_Epithelial_0dpa_vs_1dpa	DAR
chr21-10864877-10866173	7.91304e-251	-5.41574	0.003	0.123	1.62797e-245	alpk2	247	Intermediate_Epithelial_0dpa_vs_1dpa	DAR
chr14-2534218-2535457	8.46549e-250	-2.7823	0.031	0.188	1.74162e-244	fgf18a	0	Intermediate_Epithelial_0dpa_vs_1dpa	DAR
chr4-17309857-17312092	1.16157e-249	-2.01988	0.076	0.256	2.38972e-244	igf1	0	Intermediate_Epithelial_0dpa_vs_1dpa	DAR
chr24-24145148-24146189	3.11856e-249	-5.34619	0.003	0.125	6.41588e-244	map7d2b	0	Intermediate_Epithelial_0dpa_vs_1dpa	DAR
chr13-39248824-39250496	2.77987e-248	-2.89875	0.029	0.184	5.71908e-243	FRMD1	0	Intermediate_Epithelial_0dpa_vs_1dpa	DAR
chr17-49235159-49236443	5.73775e-248	-2.42705	0.047	0.216	1.18044e-242	tfb1m	0	Intermediate_Epithelial_0dpa_vs_1dpa	DAR
chr25-36660087-36661177	9.34231e-247	2.08697	0.288	0.073	1.92201e-241	mafb	13537	Intermediate_Epithelial_0dpa_vs_1dpa	DAR
chr18-38838107-38839042	1.79685e-246	-3.56417	0.015	0.152	3.6967e-241	fam214a	0	Intermediate_Epithelial_0dpa_vs_1dpa	DAR
chr12-37367715-37368339	2.01725e-246	-5.45371	0.003	0.124	4.15014e-241	tekt3	23856	Intermediate_Epithelial_0dpa_vs_1dpa	DAR
chr7-20453179-20454323	2.65387e-246	2.67944	0.218	0.036	5.45985e-241	ntn5	0	Intermediate_Epithelial_0dpa_vs_1dpa	DAR
chr18-21964768-21966068	2.97772e-246	-4.06064	0.01	0.139	6.12612e-241	ranbp10	0	Intermediate_Epithelial_0dpa_vs_1dpa	DAR
chr16-26894582-26895895	1.12564e-245	-2.433	0.046	0.208	2.31581e-240	galnt1	0	Intermediate_Epithelial_0dpa_vs_1dpa	DAR
chr3-1100058-1100683	1.23608e-243	3.76426	0.156	0.012	2.54301e-238	si:ch1073-322p19.1	0	Intermediate_Epithelial_0dpa_vs_1dpa	DAR
chr16-30363-31826	6.53982e-243	-1.48502	0.158	0.373	1.34545e-237	cdkal1	7671	Intermediate_Epithelial_0dpa_vs_1dpa	DAR
chr7-73731640-73732327	6.9343e-243	-4.07669	0.009	0.139	1.42661e-237	casq1b	0	Intermediate_Epithelial_0dpa_vs_1dpa	DAR
chr6-16332996-16333776	1.58219e-242	-3.48845	0.017	0.154	3.25506e-237	agap1	0	Intermediate_Epithelial_0dpa_vs_1dpa	DAR
chr7-66021107-66022536	1.72407e-242	3.28986	0.174	0.019	3.54696e-237	CR318647.1	5454	Intermediate_Epithelial_0dpa_vs_1dpa	DAR
chr4-19920863-19921657	1.36546e-241	3.20585	0.176	0.02	2.80919e-236	BX323820.1	0	Intermediate_Epithelial_0dpa_vs_1dpa	DAR
chr8-7365335-7366475	1.37367e-241	-3.84047	0.012	0.146	2.82608e-236	pcsk1nl	0	Intermediate_Epithelial_0dpa_vs_1dpa	DAR
chr3-2163811-2166174	4.75779e-241	-3.01034	0.026	0.174	9.7883e-236	CR933791.2	34720	Intermediate_Epithelial_0dpa_vs_1dpa	DAR
chr23-45436349-45437217	8.22985e-241	-3.0189	0.028	0.174	1.69314e-235	CABZ01076996.1	0	Intermediate_Epithelial_0dpa_vs_1dpa	DAR
chr7-51333506-51334547	1.31962e-240	-3.54255	0.015	0.15	2.71489e-235	usp12b	0	Intermediate_Epithelial_0dpa_vs_1dpa	DAR
chr13-28016873-28017885	2.26917e-240	-3.72681	0.012	0.144	4.66841e-235	smap1	0	Intermediate_Epithelial_0dpa_vs_1dpa	DAR
chr13-24682160-24683607	3.36194e-240	-4.78428	0.005	0.122	6.91658e-235	zgc:66426	0	Intermediate_Epithelial_0dpa_vs_1dpa	DAR
chr17-43808480-43809364	3.30198e-239	-2.73616	0.032	0.187	6.79323e-234	FO704777.1	34171	Intermediate_Epithelial_0dpa_vs_1dpa	DAR
chr1-4566318-4567473	1.03525e-238	-5.65197	0.002	0.118	2.12984e-233	FO744838.1	30586	Intermediate_Epithelial_0dpa_vs_1dpa	DAR
chr1-36044114-36044749	4.60075e-238	-4.48768	0.007	0.13	9.46521e-233	znf827	0	Intermediate_Epithelial_0dpa_vs_1dpa	DAR
chr1-42792126-42793023	1.80317e-237	-4.597	0.005	0.128	3.70969e-232	ctnna2	0	Intermediate_Epithelial_0dpa_vs_1dpa	DAR
chr12-48942030-48943425	3.12424e-237	-1.85884	0.095	0.288	6.42757e-232		0	Intermediate_Epithelial_0dpa_vs_1dpa	DAR
chr25-30867579-30868188	5.46129e-237	-3.42305	0.015	0.151	1.12356e-231	CR753816.1	28315	Intermediate_Epithelial_0dpa_vs_1dpa	DAR
chr23-39425264-39426268	6.01786e-237	-3.44086	0.017	0.155	1.23807e-231	src	0	Intermediate_Epithelial_0dpa_vs_1dpa	DAR
chr24-3054590-3055893	6.32054e-237	-4.37728	0.007	0.128	1.30034e-231	inhbaa	0	Intermediate_Epithelial_0dpa_vs_1dpa	DAR
chr19-892752-894213	1.18407e-236	-2.39305	0.046	0.218	2.43602e-231	eomesa	17863	Intermediate_Epithelial_0dpa_vs_1dpa	DAR
chr23-16812906-16814047	3.61253e-236	-3.30189	0.021	0.16	7.43213e-231	zgc:100832	920	Intermediate_Epithelial_0dpa_vs_1dpa	DAR
chr24-24245117-24246091	5.7048e-236	-2.57065	0.039	0.199	1.17366e-230	rps6ka3b	0	Intermediate_Epithelial_0dpa_vs_1dpa	DAR
chr4-11501121-11502591	6.46518e-236	2.03616	0.285	0.076	1.33009e-230	asb13a.2	0	Intermediate_Epithelial_0dpa_vs_1dpa	DAR
chr6-43652693-43653965	2.59693e-235	-3.05596	0.022	0.164	5.34272e-230	foxp1b	0	Intermediate_Epithelial_0dpa_vs_1dpa	DAR
chr24-25378002-25378752	3.38034e-235	-5.3165	0.003	0.119	6.95445e-230	FP103106.1	2511	Intermediate_Epithelial_0dpa_vs_1dpa	DAR
chr9-47504239-47505379	3.48676e-235	-4.2376	0.008	0.132	7.17338e-230	tns1b	0	Intermediate_Epithelial_0dpa_vs_1dpa	DAR
chr15-1328882-1330230	4.18234e-235	-3.7503	0.013	0.141	8.60442e-230	LO017713.1	6975	Intermediate_Epithelial_0dpa_vs_1dpa	DAR
chr2-46081911-46082580	5.42806e-235	-2.54782	0.042	0.202	1.11672e-229	gpc1b	0	Intermediate_Epithelial_0dpa_vs_1dpa	DAR
chr11-257137-258572	9.71601e-235	-2.12924	0.068	0.238	1.99889e-229	alas1	2190	Intermediate_Epithelial_0dpa_vs_1dpa	DAR
chr15-65225-66001	1.54884e-234	-2.56171	0.04	0.203	3.18646e-229	AXL	0	Intermediate_Epithelial_0dpa_vs_1dpa	DAR
chr22-16144585-16145212	1.0854e-233	-2.00295	0.076	0.251	2.23301e-228	slc30a7	0	Intermediate_Epithelial_0dpa_vs_1dpa	DAR
chr1-325833-326661	1.20611e-233	-4.39218	0.008	0.131	2.48136e-228	gas6	0	Intermediate_Epithelial_0dpa_vs_1dpa	DAR
chr16-45266578-45267600	4.49253e-233	-4.24435	0.007	0.13	9.24256e-228	FP016247.1	0	Intermediate_Epithelial_0dpa_vs_1dpa	DAR
chr18-46991983-46992675	1.1284e-232	-2.66174	0.034	0.19	2.32148e-227	gramd1bb	34142	Intermediate_Epithelial_0dpa_vs_1dpa	DAR
chr24-33138866-33139921	1.74526e-231	-5.10996	0.004	0.118	3.59056e-226	CR391995.1	15587	Intermediate_Epithelial_0dpa_vs_1dpa	DAR
chr24-24221078-24222575	7.21223e-231	-4.07802	0.008	0.132	1.48379e-225	rps6ka3b	0	Intermediate_Epithelial_0dpa_vs_1dpa	DAR
chr20-26682573-26685129	8.54886e-231	2.36257	0.242	0.05	1.75877e-225	foxq1b	0	Intermediate_Epithelial_0dpa_vs_1dpa	DAR
chr1-16434109-16434846	9.51245e-231	-2.07631	0.066	0.241	1.95702e-225	micu3a	0	Intermediate_Epithelial_0dpa_vs_1dpa	DAR
chr25-1749022-1750468	2.11505e-230	-4.31357	0.007	0.128	4.35134e-225	fbln1	0	Intermediate_Epithelial_0dpa_vs_1dpa	DAR
chr13-24696269-24697107	2.30113e-230	-4.68449	0.005	0.12	4.73417e-225	erlin1	4298	Intermediate_Epithelial_0dpa_vs_1dpa	DAR
chr21-7091742-7092603	2.43039e-230	-5.75856	0.002	0.113	5.0001e-225	ppp1r26	7838	Intermediate_Epithelial_0dpa_vs_1dpa	DAR
chr21-24586432-24589640	2.76931e-230	-2.02137	0.07	0.248	5.69735e-225	arhgap32b	0	Intermediate_Epithelial_0dpa_vs_1dpa	DAR
chr2-45209225-45210448	3.49578e-230	-5.15098	0.004	0.115	7.19194e-225	dre-mir-181b-1	6893	Intermediate_Epithelial_0dpa_vs_1dpa	DAR
chr16-7618265-7619473	1.17908e-229	-2.75313	0.031	0.176	2.42574e-224	CT574585.1	0	Intermediate_Epithelial_0dpa_vs_1dpa	DAR
chr12-47715996-47716855	1.38778e-229	-4.12498	0.009	0.135	2.85511e-224	lzts2b	0	Intermediate_Epithelial_0dpa_vs_1dpa	DAR
chr7-29878024-29878818	1.80671e-229	-3.69855	0.011	0.141	3.71699e-224	tln2a	0	Intermediate_Epithelial_0dpa_vs_1dpa	DAR
chr2-48206673-48207854	2.69704e-229	-3.52857	0.016	0.142	5.54867e-224	gigyf2	0	Intermediate_Epithelial_0dpa_vs_1dpa	DAR
chr6-54092660-54093827	3.60078e-229	-5.06791	0.004	0.116	7.40795e-224	hyal2a	0	Intermediate_Epithelial_0dpa_vs_1dpa	DAR
chr7-37376170-37377623	1.74143e-228	-2.46694	0.041	0.192	3.58267e-223	sall1a	0	Intermediate_Epithelial_0dpa_vs_1dpa	DAR
chr18-49895141-49896160	4.47543e-228	-3.65288	0.013	0.141	9.20739e-223	mob2b	73407	Intermediate_Epithelial_0dpa_vs_1dpa	DAR
chr7-30101201-30102014	5.33423e-228	-4.80838	0.004	0.12	1.09742e-222	alpk3b	7975	Intermediate_Epithelial_0dpa_vs_1dpa	DAR
chr7-30093978-30094945	6.40167e-228	-4.83436	0.005	0.118	1.31703e-222	nmbb	6929	Intermediate_Epithelial_0dpa_vs_1dpa	DAR
chr18-3443157-3444713	1.47145e-227	-4.32145	0.008	0.126	3.02725e-222	myo7aa	0	Intermediate_Epithelial_0dpa_vs_1dpa	DAR
chr3-26899794-26900300	1.6134e-227	-3.9694	0.011	0.132	3.31927e-222	clec16a	0	Intermediate_Epithelial_0dpa_vs_1dpa	DAR
chr15-22360351-22361975	2.86405e-227	-2.59308	0.035	0.185	5.89227e-222	pde9al	11724	Intermediate_Epithelial_0dpa_vs_1dpa	DAR
chr23-33470468-33471539	1.05518e-226	-3.56811	0.015	0.143	2.17084e-221	itga5	0	Intermediate_Epithelial_0dpa_vs_1dpa	DAR
chr13-24690218-24691299	2.91989e-226	-4.16722	0.009	0.127	6.00714e-221	zgc:66426	2095	Intermediate_Epithelial_0dpa_vs_1dpa	DAR
chr9-20368860-20369657	8.57971e-226	-5.52748	0.003	0.11	1.76512e-220	igsf3	0	Intermediate_Epithelial_0dpa_vs_1dpa	DAR
chr3-6675098-6676338	9.15854e-226	-3.52547	0.015	0.141	1.8842e-220	cygb1	5457	Intermediate_Epithelial_0dpa_vs_1dpa	DAR
chr7-49035980-49037136	2.17868e-225	-2.96088	0.023	0.168	4.48224e-220	si:ch211-288d18.1	0	Intermediate_Epithelial_0dpa_vs_1dpa	DAR
chr15-3606847-3607477	4.68117e-225	-4.29808	0.008	0.126	9.63066e-220		0	Intermediate_Epithelial_0dpa_vs_1dpa	DAR
chr14-1880755-1881874	1.31955e-224	-4.06132	0.008	0.131	2.71473e-219	pcdh2g28	5802	Intermediate_Epithelial_0dpa_vs_1dpa	DAR
chr8-37633517-37634628	2.01079e-224	-5.41457	0.003	0.112	4.13683e-219	CT025739.1	12846	Intermediate_Epithelial_0dpa_vs_1dpa	DAR
chr3-23505265-23507021	2.66046e-224	-2.40471	0.045	0.198	5.47342e-219	si:dkey-225f5.4	0	Intermediate_Epithelial_0dpa_vs_1dpa	DAR
chr2-24033480-24034262	3.78504e-224	-3.7442	0.011	0.135	7.78703e-219	slc12a7a	0	Intermediate_Epithelial_0dpa_vs_1dpa	DAR
chr13-1674160-1674846	6.06197e-224	-2.95543	0.025	0.167	1.24714e-218	DST	0	Intermediate_Epithelial_0dpa_vs_1dpa	DAR
chr7-42350283-42351721	8.59395e-224	-4.64865	0.005	0.116	1.76805e-218	phkb	4237	Intermediate_Epithelial_0dpa_vs_1dpa	DAR
chr2-31009953-31010826	2.1366e-223	-4.24281	0.007	0.126	4.39567e-218	emilin2a	0	Intermediate_Epithelial_0dpa_vs_1dpa	DAR
chr23-2386382-2387687	2.89857e-223	-2.48749	0.039	0.193	5.96329e-218	CABZ01048666.1	0	Intermediate_Epithelial_0dpa_vs_1dpa	DAR
chr12-26439354-26440075	7.79871e-223	-2.5255	0.038	0.185	1.60444e-217	itgb3b	0	Intermediate_Epithelial_0dpa_vs_1dpa	DAR
chr13-24029036-24030028	1.82883e-222	-2.47856	0.038	0.191	3.76249e-217	pgbd5	0	Intermediate_Epithelial_0dpa_vs_1dpa	DAR
chr1-21616610-21618248	3.01484e-222	-2.54949	0.036	0.182	6.2025e-217	zcchc7	0	Intermediate_Epithelial_0dpa_vs_1dpa	DAR
chr14-36259105-36260085	1.01904e-220	3.24927	0.165	0.018	2.09649e-215	elovl6	0	Intermediate_Epithelial_0dpa_vs_1dpa	DAR
chr6-11887474-11889598	1.06014e-220	-1.68711	0.108	0.289	2.18105e-215	baz2ba	0	Intermediate_Epithelial_0dpa_vs_1dpa	DAR
chr18-12115495-12116495	1.75026e-220	-2.86708	0.028	0.166	3.60085e-215	bicd1a	0	Intermediate_Epithelial_0dpa_vs_1dpa	DAR
chr15-34971657-34972692	2.01964e-220	2.02123	0.273	0.07	4.15505e-215	si:ch73-95l15.5	0	Intermediate_Epithelial_0dpa_vs_1dpa	DAR
chr24-4732007-4732721	2.14516e-220	2.26781	0.238	0.051	4.41328e-215	cpb1	22669	Intermediate_Epithelial_0dpa_vs_1dpa	DAR
chr17-35158484-35159575	2.17826e-220	-3.76834	0.01	0.135	4.48137e-215	asap2a	0	Intermediate_Epithelial_0dpa_vs_1dpa	DAR
chr6-12883949-12885182	4.65077e-220	-2.93442	0.024	0.159	9.56812e-215	ical1	0	Intermediate_Epithelial_0dpa_vs_1dpa	DAR
chr20-28706041-28706629	5.14514e-220	-2.7237	0.03	0.176	1.05852e-214	sipa1l1	0	Intermediate_Epithelial_0dpa_vs_1dpa	DAR
chr8-52949950-52951377	5.58557e-220	-2.0378	0.067	0.229	1.14913e-214	nr6a1a	0	Intermediate_Epithelial_0dpa_vs_1dpa	DAR
chr14-10648503-10649532	9.58498e-220	-4.14168	0.007	0.125	1.97194e-214	nup62l	0	Intermediate_Epithelial_0dpa_vs_1dpa	DAR
chr3-57697153-57698188	1.74937e-219	-2.26059	0.048	0.202	3.59901e-214	lgals3bpa	1057	Intermediate_Epithelial_0dpa_vs_1dpa	DAR
chr23-42521023-42521923	4.63411e-219	-5.6981	0.002	0.107	9.53386e-214	CT997819.2	3068	Intermediate_Epithelial_0dpa_vs_1dpa	DAR
chr6-53244146-53245313	5.63091e-219	-1.43576	0.157	0.353	1.15846e-213	rbm5	18540	Intermediate_Epithelial_0dpa_vs_1dpa	DAR
chr5-69408507-69409397	1.17127e-218	-2.00586	0.069	0.233	2.40968e-213	FQ311924.1	8064	Intermediate_Epithelial_0dpa_vs_1dpa	DAR
chr16-34496652-34497547	3.10954e-218	-1.96012	0.074	0.239	6.39731e-213	si:ch211-255i3.4	0	Intermediate_Epithelial_0dpa_vs_1dpa	DAR
chr7-66116017-66117064	1.31322e-216	-2.28733	0.048	0.196	2.70172e-211	btbd10b	0	Intermediate_Epithelial_0dpa_vs_1dpa	DAR
chr14-23029467-23030382	1.80326e-216	-2.63787	0.03	0.179	3.70989e-211	enox2	45744	Intermediate_Epithelial_0dpa_vs_1dpa	DAR
chr18-8535410-8536392	5.03635e-216	-3.79939	0.011	0.126	1.03614e-210	FRMD4A	0	Intermediate_Epithelial_0dpa_vs_1dpa	DAR
chr15-47372344-47374102	1.70377e-215	-1.70013	0.1	0.279	3.50521e-210	CABZ01099833.1	0	Intermediate_Epithelial_0dpa_vs_1dpa	DAR
chr8-9338230-9339533	4.34868e-215	-5.07638	0.003	0.11	8.94663e-210	plxna3	0	Intermediate_Epithelial_0dpa_vs_1dpa	DAR
chr4-8178806-8180012	4.85794e-215	-3.5929	0.013	0.136	9.99434e-210	ninj2	0	Intermediate_Epithelial_0dpa_vs_1dpa	DAR
chr19-11125207-11126048	1.99942e-214	-2.88425	0.025	0.159	4.11345e-209	si:dkey-240h12.3	3269	Intermediate_Epithelial_0dpa_vs_1dpa	DAR
chr3-27967428-27968012	2.03603e-214	-2.28998	0.049	0.199	4.18876e-209	rbfox1	14256	Intermediate_Epithelial_0dpa_vs_1dpa	DAR
chr23-410871-412595	7.93107e-214	2.43439	0.215	0.042	1.63167e-208	CU929146.1	0	Intermediate_Epithelial_0dpa_vs_1dpa	DAR
chr19-6519240-6520334	1.44504e-213	-2.96591	0.023	0.154	2.9729e-208	pvrl2l	85862	Intermediate_Epithelial_0dpa_vs_1dpa	DAR
chr9-34094073-34095130	1.81843e-213	-2.68648	0.031	0.17	3.74109e-208	ccdc80	0	Intermediate_Epithelial_0dpa_vs_1dpa	DAR
chr12-30321146-30322364	2.23611e-213	-4.41516	0.006	0.116	4.60038e-208	vwa2	0	Intermediate_Epithelial_0dpa_vs_1dpa	DAR
chr12-34300456-34302576	3.27847e-213	-2.62264	0.031	0.17	6.74486e-208	CU855552.1	5157	Intermediate_Epithelial_0dpa_vs_1dpa	DAR
chr18-23023942-23025240	2.83291e-212	-2.03243	0.065	0.224	5.8282e-207	cbfb	0	Intermediate_Epithelial_0dpa_vs_1dpa	DAR
chr23-26259393-26260372	1.17154e-211	-2.75333	0.029	0.163	2.41024e-206	MAGI3	0	Intermediate_Epithelial_0dpa_vs_1dpa	DAR
chr7-65371634-65372719	1.84479e-211	-1.84367	0.082	0.248	3.79533e-206	vat1l	0	Intermediate_Epithelial_0dpa_vs_1dpa	DAR
chr21-15571273-15572166	3.19094e-211	3.41435	0.151	0.014	6.56479e-206	smarcb1b	20259	Intermediate_Epithelial_0dpa_vs_1dpa	DAR
chr7-32788574-32790143	3.25199e-211	-2.37041	0.043	0.19	6.69037e-206	gas2b	6143	Intermediate_Epithelial_0dpa_vs_1dpa	DAR
chr11-41881903-41882689	4.55828e-211	2.29477	0.225	0.049	9.37783e-206	iffo2b	0	Intermediate_Epithelial_0dpa_vs_1dpa	DAR
chr2-54623453-54624144	5.72096e-211	-5.08682	0.004	0.108	1.17698e-205	acss2l	0	Intermediate_Epithelial_0dpa_vs_1dpa	DAR
chr21-38426668-38428373	1.03108e-210	-3.22997	0.017	0.141	2.12127e-205	CR735102.1	29698	Intermediate_Epithelial_0dpa_vs_1dpa	DAR
chr24-25145589-25146506	1.12474e-210	-2.56635	0.035	0.172	2.31396e-205	phldb2b	0	Intermediate_Epithelial_0dpa_vs_1dpa	DAR
chr18-25869959-25870795	4.99788e-210	-1.86231	0.078	0.24	1.02822e-204	sema4ba	0	Intermediate_Epithelial_0dpa_vs_1dpa	DAR
chr21-19033154-19034290	5.25624e-210	-3.20013	0.019	0.148	1.08138e-204	rpl17	0	Intermediate_Epithelial_0dpa_vs_1dpa	DAR
chr7-39168418-39170487	5.36238e-210	-2.46932	0.039	0.184	1.10321e-204	mdka	0	Intermediate_Epithelial_0dpa_vs_1dpa	DAR
chr25-20352517-20353868	1.06523e-208	1.67806	0.33	0.108	2.19151e-203	si:dkey-219c3.2	0	Intermediate_Epithelial_0dpa_vs_1dpa	DAR
chr2-46095526-46096829	1.11633e-208	-3.88047	0.009	0.121	2.29665e-203	gpc1b	0	Intermediate_Epithelial_0dpa_vs_1dpa	DAR
chr5-32507435-32508466	5.1323e-208	-2.10917	0.056	0.208	1.05588e-202	ntmt1	2154	Intermediate_Epithelial_0dpa_vs_1dpa	DAR
chr15-1382877-1384180	7.45556e-208	-2.24522	0.049	0.191	1.53385e-202	schip1	0	Intermediate_Epithelial_0dpa_vs_1dpa	DAR
chr24-14365738-14366893	2.00156e-207	-2.22854	0.05	0.197	4.11786e-202	ncoa2	0	Intermediate_Epithelial_0dpa_vs_1dpa	DAR
chr5-59303387-59304504	3.54908e-207	-2.65874	0.031	0.168	7.3016e-202	rasa4	0	Intermediate_Epithelial_0dpa_vs_1dpa	DAR
chr15-25879979-25881288	4.09075e-207	-3.04048	0.021	0.151	8.41598e-202	dre-mir-212	16157	Intermediate_Epithelial_0dpa_vs_1dpa	DAR
chr2-26548416-26549348	4.72463e-207	-4.1804	0.007	0.118	9.72008e-202	glis1a	0	Intermediate_Epithelial_0dpa_vs_1dpa	DAR
chr25-25606671-25607621	6.47263e-207	-2.1448	0.055	0.21	1.33163e-201	tbc1d2b	0	Intermediate_Epithelial_0dpa_vs_1dpa	DAR
chr23-44719827-44720607	2.42293e-206	-3.47721	0.014	0.14	4.98473e-201	mogat3a	0	Intermediate_Epithelial_0dpa_vs_1dpa	DAR
chr1-6692417-6693354	5.29696e-206	-3.52195	0.014	0.132	1.08975e-200	AL929396.1	24248	Intermediate_Epithelial_0dpa_vs_1dpa	DAR
chr22-26579847-26580809	6.28324e-206	-3.48754	0.014	0.131	1.29266e-200	CABZ01072309.2	0	Intermediate_Epithelial_0dpa_vs_1dpa	DAR
chr2-57665205-57666670	8.10981e-206	-4.71235	0.005	0.111	1.66845e-200	CABZ01060891.1	0	Intermediate_Epithelial_0dpa_vs_1dpa	DAR
chr7-73735516-73736176	8.4931e-206	-4.6723	0.005	0.108	1.7473e-200	casq1b	0	Intermediate_Epithelial_0dpa_vs_1dpa	DAR
chr8-17290468-17291464	9.05465e-206	-1.83377	0.084	0.251	1.86283e-200	BX465215.1	38113	Intermediate_Epithelial_0dpa_vs_1dpa	DAR
chr7-35232033-35232955	2.61968e-205	2.66947	0.187	0.031	5.38952e-200	tppp3	0	Intermediate_Epithelial_0dpa_vs_1dpa	DAR
chr15-17368359-17369555	2.89172e-205	-4.26497	0.006	0.11	5.94918e-200	vmp1	0	Intermediate_Epithelial_0dpa_vs_1dpa	DAR
chr5-59289485-59290560	4.08723e-205	-2.40837	0.041	0.191	8.40874e-200	rasa4	0	Intermediate_Epithelial_0dpa_vs_1dpa	DAR
chr3-57708415-57709620	1.29968e-204	2.22215	0.229	0.05	2.67386e-199	lgals3bpa	0	Intermediate_Epithelial_0dpa_vs_1dpa	DAR
chr7-15953093-15953687	3.16703e-204	-5.33326	0.003	0.103	6.51559e-199	elp4	0	Intermediate_Epithelial_0dpa_vs_1dpa	DAR
chr19-25104003-25105386	2.29784e-203	-1.69196	0.099	0.263	4.7274e-198	ptp4a3a	0	Intermediate_Epithelial_0dpa_vs_1dpa	DAR
chr19-34982611-34983249	2.43157e-203	-3.41441	0.014	0.132	5.00252e-198	ndrg1a	2773	Intermediate_Epithelial_0dpa_vs_1dpa	DAR
chr12-29111947-29112936	2.50914e-203	-4.6919	0.005	0.111	5.1621e-198	CT573003.1	1141	Intermediate_Epithelial_0dpa_vs_1dpa	DAR
chr23-10347536-10348891	3.74278e-203	-2.09444	0.06	0.209	7.7001e-198	krt18a.1	0	Intermediate_Epithelial_0dpa_vs_1dpa	DAR
chr18-12051355-12052446	6.81823e-203	-4.7195	0.005	0.109	1.40273e-197	zgc:110789	0	Intermediate_Epithelial_0dpa_vs_1dpa	DAR
chr7-69549210-69550450	6.9563e-203	-2.83516	0.023	0.154	1.43113e-197	RAP1GDS1	0	Intermediate_Epithelial_0dpa_vs_1dpa	DAR
chr1-5803258-5805130	8.10059e-203	-4.05602	0.007	0.115	1.66655e-197	pard3ba	0	Intermediate_Epithelial_0dpa_vs_1dpa	DAR
chr5-34051185-34052269	8.13659e-203	-4.86855	0.004	0.107	1.67396e-197	fibcd1	14321	Intermediate_Epithelial_0dpa_vs_1dpa	DAR
chr13-36826047-36826627	2.06237e-202	2.65781	0.186	0.029	4.24296e-197	nin	0	Intermediate_Epithelial_0dpa_vs_1dpa	DAR
chr8-40618876-40619680	3.1096e-202	-3.78465	0.01	0.121	6.39744e-197	dusp2	9245	Intermediate_Epithelial_0dpa_vs_1dpa	DAR
chr25-35998638-35999432	3.66808e-202	-2.75876	0.028	0.161	7.54641e-197	sall1b	2496	Intermediate_Epithelial_0dpa_vs_1dpa	DAR
chr12-3835099-3835980	3.88033e-202	-2.84406	0.023	0.152	7.98307e-197	taok2b	0	Intermediate_Epithelial_0dpa_vs_1dpa	DAR
chr8-25926557-25927715	4.32423e-202	-2.29715	0.042	0.187	8.89632e-197	sema3h	0	Intermediate_Epithelial_0dpa_vs_1dpa	DAR
chr20-7537356-7538061	5.38128e-202	-4.88142	0.004	0.104	1.1071e-196	usp24	0	Intermediate_Epithelial_0dpa_vs_1dpa	DAR
chr9-13651005-13651622	2.5092e-201	2.95927	0.164	0.022	5.16223e-196	als2a	0	Intermediate_Epithelial_0dpa_vs_1dpa	DAR
chr12-1846887-1847835	3.57462e-201	-3.30727	0.016	0.137	7.35413e-196	sox9a	99757	Intermediate_Epithelial_0dpa_vs_1dpa	DAR
chr8-42677317-42678741	4.12667e-201	-1.68306	0.098	0.264	8.48989e-196	si:ch73-138n13.1	0	Intermediate_Epithelial_0dpa_vs_1dpa	DAR
chr13-51746738-51747508	1.98762e-200	3.1825	0.155	0.017	4.08917e-195	pwwp2b	15439	Intermediate_Epithelial_0dpa_vs_1dpa	DAR
chr4-2225500-2226875	3.3922e-200	2.57933	0.193	0.033	6.97885e-195	cmah	1878	Intermediate_Epithelial_0dpa_vs_1dpa	DAR
chr7-49075121-49076212	8.84932e-200	-1.5796	0.11	0.283	1.82059e-194	b4galnt4b	2677	Intermediate_Epithelial_0dpa_vs_1dpa	DAR
chr25-572503-573237	2.04005e-199	-2.93963	0.022	0.147	4.19704e-194	nell2a	7989	Intermediate_Epithelial_0dpa_vs_1dpa	DAR
chr19-28628635-28630095	3.61759e-199	-4.37847	0.006	0.108	7.44255e-194	BX957317.2	47998	Intermediate_Epithelial_0dpa_vs_1dpa	DAR
chr1-17037816-17038977	4.56193e-199	-4.85763	0.004	0.104	9.38535e-194	BX928751.7	96385	Intermediate_Epithelial_0dpa_vs_1dpa	DAR
chr5-56739428-56740281	5.31021e-199	-4.45404	0.006	0.11	1.09248e-193	ppm1db	174609	Intermediate_Epithelial_0dpa_vs_1dpa	DAR
chr6-30538435-30539174	6.99188e-199	-3.94582	0.008	0.118	1.43845e-193	wwc3	0	Intermediate_Epithelial_0dpa_vs_1dpa	DAR
chr23-39427153-39427780	7.20933e-199	-3.49224	0.013	0.126	1.48319e-193	src	0	Intermediate_Epithelial_0dpa_vs_1dpa	DAR
chr13-32669837-32670774	7.61818e-199	-4.2433	0.007	0.11	1.5673e-193	pdss2	0	Intermediate_Epithelial_0dpa_vs_1dpa	DAR
chr23-36148934-36150133	8.49664e-199	2.32845	0.214	0.043	1.74803e-193	hoxc3a	0	Intermediate_Epithelial_0dpa_vs_1dpa	DAR
chr6-46068773-46069805	1.06414e-198	-4.3374	0.006	0.112	2.18928e-193	ca16b	0	Intermediate_Epithelial_0dpa_vs_1dpa	DAR
chr6-16029588-16032093	2.11094e-198	-1.9118	0.071	0.224	4.34288e-193	gbx2	0	Intermediate_Epithelial_0dpa_vs_1dpa	DAR
chr20-35802637-35804079	1.18335e-197	-1.85769	0.074	0.222	2.43453e-192	tnfrsf21	0	Intermediate_Epithelial_0dpa_vs_1dpa	DAR
chr13-36342323-36343185	4.40476e-197	-2.17573	0.049	0.203	9.062e-192	actn1	0	Intermediate_Epithelial_0dpa_vs_1dpa	DAR
chr18-9920064-9921752	4.5757e-197	-4.06565	0.009	0.117	9.41368e-192	CACNA2D1	0	Intermediate_Epithelial_0dpa_vs_1dpa	DAR
chr8-49190656-49192027	5.63803e-197	-2.20303	0.051	0.198	1.15992e-191	zgc:171501	0	Intermediate_Epithelial_0dpa_vs_1dpa	DAR
chr9-47117159-47118187	7.28275e-197	3.03857	0.157	0.02	1.49829e-191	igfbp5b	274979	Intermediate_Epithelial_0dpa_vs_1dpa	DAR
chr17-37593127-37594408	7.83829e-197	1.29274	0.419	0.189	1.61259e-191	mta1	0	Intermediate_Epithelial_0dpa_vs_1dpa	DAR
chr23-23511059-23511976	2.69379e-196	-3.09324	0.018	0.133	5.54198e-191	agrn	0	Intermediate_Epithelial_0dpa_vs_1dpa	DAR
chr20-6870885-6871898	4.57803e-196	2.24871	0.219	0.047	9.41848e-191	adcy1a	22987	Intermediate_Epithelial_0dpa_vs_1dpa	DAR
chr6-44152261-44153378	7.15573e-196	3.02118	0.157	0.02	1.47216e-190	shq1	0	Intermediate_Epithelial_0dpa_vs_1dpa	DAR
chr24-39004944-39006037	7.33092e-196	-3.56881	0.012	0.12	1.50821e-190	capn15	21443	Intermediate_Epithelial_0dpa_vs_1dpa	DAR
chr6-14286489-14287794	8.48718e-196	-3.24534	0.016	0.135	1.74608e-190	inpp4ab	0	Intermediate_Epithelial_0dpa_vs_1dpa	DAR
chr17-45033690-45034938	1.46699e-195	2.84321	0.166	0.024	3.01807e-190	entpd5a	0	Intermediate_Epithelial_0dpa_vs_1dpa	DAR
chr13-46152587-46153212	1.76424e-195	-2.88611	0.024	0.146	3.6296e-190	marcksl1a	24265	Intermediate_Epithelial_0dpa_vs_1dpa	DAR
chr6-41636465-41637320	5.61381e-195	3.18399	0.15	0.016	1.15494e-189	srgap3	0	Intermediate_Epithelial_0dpa_vs_1dpa	DAR
chr19-41763527-41764588	9.25094e-195	-2.33907	0.041	0.175	1.90321e-189	tinagl1	4546	Intermediate_Epithelial_0dpa_vs_1dpa	DAR
chr2-43505758-43506628	9.93041e-195	-4.3875	0.006	0.109	2.043e-189	nrp1b	0	Intermediate_Epithelial_0dpa_vs_1dpa	DAR
chr18-18352441-18353161	1.04069e-194	3.62988	0.133	0.011	2.14104e-189	n4bp1	52830	Intermediate_Epithelial_0dpa_vs_1dpa	DAR
chr23-10145473-10146030	1.06769e-194	-2.92712	0.021	0.148	2.19658e-189	zgc:171775	511	Intermediate_Epithelial_0dpa_vs_1dpa	DAR
chr15-8947966-8948815	3.03441e-194	2.35189	0.206	0.04	6.24275e-189	CR847977.1	38827	Intermediate_Epithelial_0dpa_vs_1dpa	DAR
chr17-41070390-41071672	9.91943e-194	-3.0494	0.02	0.135	2.04074e-188	rbks	0	Intermediate_Epithelial_0dpa_vs_1dpa	DAR
chr3-62188521-62189723	1.01964e-193	-1.84127	0.075	0.233	2.09772e-188	tbl3	0	Intermediate_Epithelial_0dpa_vs_1dpa	DAR
chr5-52568132-52569706	1.6187e-193	-4.17725	0.007	0.108	3.33017e-188	mamdc2a	0	Intermediate_Epithelial_0dpa_vs_1dpa	DAR
chr14-40735244-40736451	1.81447e-193	-1.41874	0.146	0.318	3.73294e-188	elf1	9381	Intermediate_Epithelial_0dpa_vs_1dpa	DAR
chr7-18484061-18485088	2.02936e-193	-4.64612	0.005	0.103	4.17505e-188	rgs12a	0	Intermediate_Epithelial_0dpa_vs_1dpa	DAR
chr7-6668373-6669869	2.4656e-193	2.39968	0.197	0.039	5.07254e-188	pnp5a	0	Intermediate_Epithelial_0dpa_vs_1dpa	DAR
chr24-268592-271452	4.964e-193	-4.33489	0.006	0.111	1.02125e-187	ccr12b.2	2733	Intermediate_Epithelial_0dpa_vs_1dpa	DAR
chr18-6763398-6764144	1.2753e-192	-1.84456	0.076	0.227	2.6237e-187	adm2b	0	Intermediate_Epithelial_0dpa_vs_1dpa	DAR
chr5-3027766-3028965	1.74216e-192	-3.18648	0.017	0.134	3.58417e-187	hsf5	66015	Intermediate_Epithelial_0dpa_vs_1dpa	DAR
chr9-20353980-20354967	2.58075e-192	-4.35659	0.005	0.105	5.30942e-187	igsf3	0	Intermediate_Epithelial_0dpa_vs_1dpa	DAR
chr6-43151420-43152900	4.561e-192	-3.06919	0.019	0.137	9.38344e-187	lrrn1	59244	Intermediate_Epithelial_0dpa_vs_1dpa	DAR
chr8-40264451-40265759	1.2763e-191	-2.0385	0.054	0.204	2.62576e-186	kdm2ba	0	Intermediate_Epithelial_0dpa_vs_1dpa	DAR
chr14-1515930-1516949	2.68552e-191	-3.44878	0.015	0.127	5.52497e-186	CABZ01109481.1	7270	Intermediate_Epithelial_0dpa_vs_1dpa	DAR
chr6-459546-460570	3.07286e-191	-2.87334	0.022	0.147	6.32185e-186	LO017974.1	14693	Intermediate_Epithelial_0dpa_vs_1dpa	DAR
chr11-37579189-37580156	8.39743e-191	-4.26918	0.006	0.107	1.72762e-185	bsnb	0	Intermediate_Epithelial_0dpa_vs_1dpa	DAR
chr2-41828303-41829647	3.57118e-190	-1.51337	0.118	0.287	7.34706e-185	keap1a	5377	Intermediate_Epithelial_0dpa_vs_1dpa	DAR
chr7-73733730-73734352	4.33791e-190	-3.44381	0.013	0.122	8.92447e-185	casq1b	0	Intermediate_Epithelial_0dpa_vs_1dpa	DAR
chr2-41760535-41761662	5.46934e-190	-1.6464	0.1	0.263	1.12522e-184	SSBP4	37047	Intermediate_Epithelial_0dpa_vs_1dpa	DAR
chr5-44424416-44425573	7.68227e-190	-3.9412	0.009	0.109	1.58049e-184	gas1a	30180	Intermediate_Epithelial_0dpa_vs_1dpa	DAR
chr17-35912049-35913125	1.12179e-189	-1.51405	0.118	0.288	2.30787e-184	AL929378.2	0	Intermediate_Epithelial_0dpa_vs_1dpa	DAR
chr8-20542224-20543115	1.3989e-189	-2.7344	0.027	0.15	2.87798e-184	csnk1g2b	0	Intermediate_Epithelial_0dpa_vs_1dpa	DAR
chr9-39791993-39792895	1.44503e-189	2.44095	0.195	0.035	2.97288e-184	ikzf2	167222	Intermediate_Epithelial_0dpa_vs_1dpa	DAR
chr4-4340733-4341879	1.56672e-189	2.47456	0.189	0.034	3.22324e-184	CU468826.1	0	Intermediate_Epithelial_0dpa_vs_1dpa	DAR
chr21-27020922-27022237	2.18963e-189	-4.01114	0.008	0.112	4.50477e-184	ppp1r14ba	10084	Intermediate_Epithelial_0dpa_vs_1dpa	DAR
chr10-42128686-42129301	2.81232e-189	-3.45167	0.013	0.121	5.78585e-184	stambpa	0	Intermediate_Epithelial_0dpa_vs_1dpa	DAR
chr12-23465863-23467022	1.05294e-188	-2.97384	0.02	0.137	2.16623e-183	BX005058.2	0	Intermediate_Epithelial_0dpa_vs_1dpa	DAR
chr15-25615236-25616231	1.60508e-188	-3.34001	0.014	0.124	3.30216e-183	taok1a	0	Intermediate_Epithelial_0dpa_vs_1dpa	DAR
chr8-3370466-3371652	3.70893e-188	2.20551	0.218	0.048	7.63046e-183	fut9b	0	Intermediate_Epithelial_0dpa_vs_1dpa	DAR
chr11-19441789-19442690	4.06642e-188	-2.89431	0.021	0.141	8.36593e-183	prickle2b	0	Intermediate_Epithelial_0dpa_vs_1dpa	DAR
chr8-49815443-49816472	4.28712e-188	-4.31523	0.007	0.105	8.81997e-183	ntrk2a	0	Intermediate_Epithelial_0dpa_vs_1dpa	DAR
chr3-48541647-48542450	5.70438e-188	-2.22506	0.044	0.181	1.17357e-182	atp5pd	6843	Intermediate_Epithelial_0dpa_vs_1dpa	DAR
chr3-3095235-3096677	8.3506e-188	-3.86139	0.008	0.11	1.71799e-182	si:dkey-30g5.1	2814	Intermediate_Epithelial_0dpa_vs_1dpa	DAR
chr25-6076976-6077645	9.05241e-188	-4.29557	0.006	0.106	1.86237e-182	cpeb1a	0	Intermediate_Epithelial_0dpa_vs_1dpa	DAR
chr20-22629448-22630449	9.07903e-188	-2.17874	0.048	0.182	1.86785e-182	lnx1	36098	Intermediate_Epithelial_0dpa_vs_1dpa	DAR
chr10-43028345-43029518	9.78959e-188	1.55394	0.335	0.12	2.01403e-182	ssbp2	0	Intermediate_Epithelial_0dpa_vs_1dpa	DAR
chr18-20960247-20961163	1.11816e-187	2.95312	0.156	0.021	2.3004e-182	igf1ra	0	Intermediate_Epithelial_0dpa_vs_1dpa	DAR
chr7-37267954-37269066	1.75286e-187	-3.66945	0.01	0.112	3.60619e-182	sall1a	89937	Intermediate_Epithelial_0dpa_vs_1dpa	DAR
chr10-43824503-43827071	4.54024e-187	-3.97712	0.008	0.113	9.34073e-182	CT583727.1	4810	Intermediate_Epithelial_0dpa_vs_1dpa	DAR
chr1-22860957-22862158	5.48406e-187	-1.59417	0.106	0.268	1.12825e-181	BX908795.1	0	Intermediate_Epithelial_0dpa_vs_1dpa	DAR
chr10-422598-424067	1.00001e-186	-2.89101	0.026	0.146	2.05734e-181	zdhhc8a	4201	Intermediate_Epithelial_0dpa_vs_1dpa	DAR
chr5-383443-384501	1.20056e-186	-3.50182	0.013	0.12	2.46993e-181	HOOK3	0	Intermediate_Epithelial_0dpa_vs_1dpa	DAR
chr18-17245315-17246235	1.94291e-186	-4.4567	0.005	0.105	3.99719e-181	zfpm1	24191	Intermediate_Epithelial_0dpa_vs_1dpa	DAR
chr19-48195260-48196042	2.55147e-186	-2.52195	0.032	0.161	5.24919e-181	prdm1b	9035	Intermediate_Epithelial_0dpa_vs_1dpa	DAR
chr19-19285221-19286338	3.14789e-186	-4.20681	0.007	0.106	6.47621e-181	cspg5b	0	Intermediate_Epithelial_0dpa_vs_1dpa	DAR
chr21-24606908-24608671	5.04958e-186	-2.35209	0.038	0.167	1.03886e-180	arhgap32b	0	Intermediate_Epithelial_0dpa_vs_1dpa	DAR
chr3-22262914-22263794	9.1533e-186	-3.0616	0.018	0.136	1.88313e-180	scn4ab	0	Intermediate_Epithelial_0dpa_vs_1dpa	DAR
chr7-20283693-20284530	9.21384e-186	2.12798	0.222	0.053	1.89558e-180	dvl2	0	Intermediate_Epithelial_0dpa_vs_1dpa	DAR
chr16-16960954-16962411	1.20918e-185	-2.82534	0.022	0.137	2.48768e-180	si:ch211-120k19.1	6270	Intermediate_Epithelial_0dpa_vs_1dpa	DAR
chr12-27597206-27598917	1.37411e-185	-1.69942	0.091	0.241	2.82698e-180	spata20	0	Intermediate_Epithelial_0dpa_vs_1dpa	DAR
chr18-34494498-34495316	3.35246e-185	-3.82444	0.009	0.11	6.89708e-180	kcnab1a	0	Intermediate_Epithelial_0dpa_vs_1dpa	DAR
chr5-24340534-24341119	6.20373e-185	1.86846	0.263	0.076	1.2763e-179	znf703	6849	Intermediate_Epithelial_0dpa_vs_1dpa	DAR
chr10-9022263-9024628	6.22771e-185	-2.29037	0.04	0.171	1.28124e-179	arl15b	0	Intermediate_Epithelial_0dpa_vs_1dpa	DAR
chr11-22137064-22138234	1.00059e-184	-2.34818	0.037	0.166	2.05853e-179	MDFI	0	Intermediate_Epithelial_0dpa_vs_1dpa	DAR
chr19-24716251-24717434	1.53976e-184	-3.23646	0.015	0.124	3.16778e-179	myo1g	0	Intermediate_Epithelial_0dpa_vs_1dpa	DAR
chr5-15067617-15068370	3.62757e-184	-2.29987	0.039	0.168	7.46307e-179	CR936518.2	0	Intermediate_Epithelial_0dpa_vs_1dpa	DAR
chr3-48806949-48807722	3.63788e-184	-4.02862	0.007	0.105	7.48428e-179	hs3st3b1a	35195	Intermediate_Epithelial_0dpa_vs_1dpa	DAR
chr22-4695527-4696273	4.45061e-184	-3.01272	0.02	0.133	9.15633e-179	cers4a	11389	Intermediate_Epithelial_0dpa_vs_1dpa	DAR
chr5-21883736-21884139	6.48872e-184	-3.63015	0.01	0.114	1.33494e-178	smarca1	0	Intermediate_Epithelial_0dpa_vs_1dpa	DAR
chr2-55184072-55185220	9.13498e-184	-3.55547	0.011	0.115	1.87936e-178	zmp:0000000521	14500	Intermediate_Epithelial_0dpa_vs_1dpa	DAR
chr2-25377820-25378817	1.11278e-183	-4.29239	0.006	0.102	2.28935e-178	fndc3ba	0	Intermediate_Epithelial_0dpa_vs_1dpa	DAR
chr16-43406475-43407695	1.49203e-183	3.12767	0.143	0.016	3.06959e-178	sqlea	0	Intermediate_Epithelial_0dpa_vs_1dpa	DAR
chr1-34583576-34584825	2.18463e-183	-2.7148	0.026	0.143	4.49448e-178	pibf1	8664	Intermediate_Epithelial_0dpa_vs_1dpa	DAR
chr19-28740868-28741754	2.69169e-183	-3.71001	0.009	0.113	5.53767e-178	sox4a	0	Intermediate_Epithelial_0dpa_vs_1dpa	DAR
chr19-22054908-22055765	3.57293e-183	-2.56434	0.029	0.155	7.35066e-178	sall3b	6436	Intermediate_Epithelial_0dpa_vs_1dpa	DAR
chr9-3078798-3080220	4.15519e-183	2.01319	0.242	0.06	8.54856e-178	ppp1r9ala	0	Intermediate_Epithelial_0dpa_vs_1dpa	DAR
chr21-22751829-22752880	4.15722e-183	-2.27185	0.041	0.169	8.55273e-178	arhgap42a	0	Intermediate_Epithelial_0dpa_vs_1dpa	DAR
chr11-34158262-34158984	4.32079e-183	-3.46416	0.013	0.118	8.88925e-178	atp13a3	0	Intermediate_Epithelial_0dpa_vs_1dpa	DAR
chr15-44976855-44977855	7.54593e-183	-2.01224	0.054	0.203	1.55244e-177	pdgfd	0	Intermediate_Epithelial_0dpa_vs_1dpa	DAR
chr11-44110501-44111050	7.74753e-183	-3.90766	0.008	0.108	1.59391e-177	FO704721.3	0	Intermediate_Epithelial_0dpa_vs_1dpa	DAR
chr18-50315947-50316848	1.88413e-182	-2.40841	0.034	0.161	3.87626e-177	insyn1	0	Intermediate_Epithelial_0dpa_vs_1dpa	DAR
chr25-26820291-26821829	1.94041e-182	-3.81294	0.009	0.108	3.99204e-177	man2c1	0	Intermediate_Epithelial_0dpa_vs_1dpa	DAR
chr2-11486987-11489141	2.10076e-182	-4.0652	0.007	0.103	4.32194e-177	sdr16c5a	0	Intermediate_Epithelial_0dpa_vs_1dpa	DAR
chr24-39016208-39017344	3.5804e-182	-1.64997	0.095	0.249	7.36603e-177	capn15	10136	Intermediate_Epithelial_0dpa_vs_1dpa	DAR
chr21-11746994-11747641	5.33921e-182	-1.97182	0.058	0.198	1.09845e-176	ell2	1455	Intermediate_Epithelial_0dpa_vs_1dpa	DAR
chr13-49308428-49309274	8.39835e-182	2.25006	0.205	0.046	1.72781e-176	egln1a	101714	Intermediate_Epithelial_0dpa_vs_1dpa	DAR
chr1-4432710-4433625	1.93604e-181	-4.48348	0.005	0.1	3.98306e-176	FO744838.1	164434	Intermediate_Epithelial_0dpa_vs_1dpa	DAR
chr11-2800244-2801324	1.16723e-180	-3.4127	0.012	0.118	2.40136e-175	srpk1b	0	Intermediate_Epithelial_0dpa_vs_1dpa	DAR
chr22-19870766-19871447	1.38972e-180	-4.36226	0.005	0.104	2.8591e-175	celf5a	0	Intermediate_Epithelial_0dpa_vs_1dpa	DAR
chr16-2621609-2622773	2.01107e-180	-3.36402	0.012	0.122	4.13742e-175	lyplal1	14704	Intermediate_Epithelial_0dpa_vs_1dpa	DAR
chr23-33464584-33465177	2.34925e-180	-4.11881	0.007	0.103	4.83317e-175	itga5	0	Intermediate_Epithelial_0dpa_vs_1dpa	DAR
chr9-40711-42118	5.93879e-180	-1.68865	0.094	0.249	1.2218e-174	map4k4	0	Intermediate_Epithelial_0dpa_vs_1dpa	DAR
chr2-41799040-41800061	6.19893e-180	-1.46141	0.12	0.276	1.27532e-174	keap1a	34963	Intermediate_Epithelial_0dpa_vs_1dpa	DAR
chr9-35210379-35211337	1.10152e-179	2.33183	0.195	0.039	2.26619e-174	ncam2	0	Intermediate_Epithelial_0dpa_vs_1dpa	DAR
chr5-43439675-43440940	1.42185e-179	1.71178	0.282	0.092	2.9252e-174	rhobtb4	0	Intermediate_Epithelial_0dpa_vs_1dpa	DAR
chr6-59785266-59786777	2.75471e-179	-4.0202	0.007	0.101	5.66733e-174	caskb	21899	Intermediate_Epithelial_0dpa_vs_1dpa	DAR
chr11-35780400-35781191	6.51116e-179	-2.21167	0.045	0.174	1.33955e-173	itpr1b	0	Intermediate_Epithelial_0dpa_vs_1dpa	DAR
chr3-30092859-30094673	9.20246e-179	1.38486	0.359	0.151	1.89324e-173	ppfia3	0	Intermediate_Epithelial_0dpa_vs_1dpa	DAR
chr11-31440944-31441768	1.20674e-178	-2.25704	0.041	0.164	2.48266e-173	sipa1l2	0	Intermediate_Epithelial_0dpa_vs_1dpa	DAR
chr23-33610845-33611796	4.62932e-178	-3.84894	0.008	0.106	9.52399e-173	csrnp2	21444	Intermediate_Epithelial_0dpa_vs_1dpa	DAR
chr13-1664332-1665104	1.97337e-177	-2.9482	0.02	0.132	4.05985e-172	DST	0	Intermediate_Epithelial_0dpa_vs_1dpa	DAR
chr5-22077806-22078828	3.03138e-177	-1.83043	0.073	0.217	6.23652e-172	zc4h2	0	Intermediate_Epithelial_0dpa_vs_1dpa	DAR
chr8-37167666-37169089	3.40411e-177	1.69719	0.281	0.092	7.00334e-172	csf1b	0	Intermediate_Epithelial_0dpa_vs_1dpa	DAR
chr23-14846021-14846978	5.06967e-177	-3.86979	0.008	0.106	1.04299e-171	ndrg3b	0	Intermediate_Epithelial_0dpa_vs_1dpa	DAR
chr12-26805996-26807717	5.7308e-177	-3.71446	0.009	0.109	1.17901e-171	zeb1b	0	Intermediate_Epithelial_0dpa_vs_1dpa	DAR
chr17-14935829-14937034	1.09478e-176	1.50765	0.319	0.124	2.25231e-171	txndc16	0	Intermediate_Epithelial_0dpa_vs_1dpa	DAR
chr7-23688203-23689293	3.63757e-176	-2.81674	0.022	0.135	7.48365e-171	si:dkey-172j4.3	0	Intermediate_Epithelial_0dpa_vs_1dpa	DAR
chr6-1848649-1849533	1.3835e-175	-3.01732	0.018	0.126	2.8463e-170	dlgap4b	0	Intermediate_Epithelial_0dpa_vs_1dpa	DAR
chr18-5707145-5708421	1.47958e-175	-1.86051	0.065	0.208	3.04397e-170	cplx3b	14852	Intermediate_Epithelial_0dpa_vs_1dpa	DAR
chr15-37789937-37790867	2.25039e-175	-2.96029	0.019	0.126	4.62976e-170	si:dkey-42l23.2	4418	Intermediate_Epithelial_0dpa_vs_1dpa	DAR
chr8-11823165-11824290	2.48058e-175	-2.05001	0.051	0.182	5.10334e-170	rapgef1a	0	Intermediate_Epithelial_0dpa_vs_1dpa	DAR
chr19-1751585-1752048	2.75059e-175	-3.8424	0.009	0.105	5.65885e-170	dennd3a	13139	Intermediate_Epithelial_0dpa_vs_1dpa	DAR
chr3-43032875-43033783	3.55772e-175	-3.81527	0.009	0.106	7.31937e-170	ints1	0	Intermediate_Epithelial_0dpa_vs_1dpa	DAR
chr2-37312700-37313815	6.11265e-175	-2.66097	0.026	0.14	1.25757e-169	skila	0	Intermediate_Epithelial_0dpa_vs_1dpa	DAR
chr13-5208701-5211067	9.47155e-175	1.42212	0.349	0.142	1.9486e-169	si:dkey-78p8.1	32099	Intermediate_Epithelial_0dpa_vs_1dpa	DAR
chr4-21595018-21595873	2.6281e-174	-2.6123	0.025	0.146	5.40684e-169	ppp1r12a	10859	Intermediate_Epithelial_0dpa_vs_1dpa	DAR
chr9-28974124-28975181	3.74778e-174	-2.80818	0.022	0.134	7.71038e-169	ptpn4a	0	Intermediate_Epithelial_0dpa_vs_1dpa	DAR
chr17-41201758-41202665	3.9086e-174	-3.23397	0.014	0.118	8.04124e-169	babam2	0	Intermediate_Epithelial_0dpa_vs_1dpa	DAR
chr20-25473459-25474617	9.82709e-174	2.80687	0.151	0.022	2.02175e-168	si:dkey-183n20.15	0	Intermediate_Epithelial_0dpa_vs_1dpa	DAR
chr24-8527587-8528438	1.50906e-173	-1.63031	0.088	0.239	3.10462e-168	slc35b3	115060	Intermediate_Epithelial_0dpa_vs_1dpa	DAR
chr23-22529425-22530051	1.56898e-173	-2.88751	0.02	0.131	3.2279e-168	spsb1	6121	Intermediate_Epithelial_0dpa_vs_1dpa	DAR
chr10-126947-128401	3.34394e-173	-3.25251	0.015	0.117	6.87954e-168	KCNJ6	0	Intermediate_Epithelial_0dpa_vs_1dpa	DAR
chr20-22455013-22456186	3.57211e-173	-2.42399	0.032	0.152	7.34897e-168	pdgfra	0	Intermediate_Epithelial_0dpa_vs_1dpa	DAR
chr15-15746227-15746975	6.92077e-173	-2.79889	0.022	0.138	1.42382e-167	si:ch211-33e4.3	24442	Intermediate_Epithelial_0dpa_vs_1dpa	DAR
chr10-33704014-33705213	7.75035e-173	1.95621	0.232	0.061	1.5945e-167	b3glctb	0	Intermediate_Epithelial_0dpa_vs_1dpa	DAR
chr4-7923688-7924586	9.80901e-173	-2.87568	0.021	0.135	2.01803e-167	camk1da	0	Intermediate_Epithelial_0dpa_vs_1dpa	DAR
chr13-21831544-21832779	1.52323e-172	-3.07092	0.016	0.117	3.13377e-167	zswim8	0	Intermediate_Epithelial_0dpa_vs_1dpa	DAR
chr7-39185754-39187552	1.84874e-172	-2.7338	0.023	0.134	3.80345e-167	chrm4a	0	Intermediate_Epithelial_0dpa_vs_1dpa	DAR
chr10-8837967-8839155	1.94572e-172	-3.6982	0.009	0.107	4.00297e-167	itga1	0	Intermediate_Epithelial_0dpa_vs_1dpa	DAR
chr4-11629717-11631671	3.94841e-172	1.17034	0.427	0.21	8.12314e-167	BX465862.4	0	Intermediate_Epithelial_0dpa_vs_1dpa	DAR
chr16-22613759-22614659	7.88999e-172	-2.91005	0.02	0.128	1.62322e-166	chrnb2	3960	Intermediate_Epithelial_0dpa_vs_1dpa	DAR
chr11-2784936-2785880	9.81454e-172	-2.4568	0.031	0.151	2.01916e-166	srpk1b	0	Intermediate_Epithelial_0dpa_vs_1dpa	DAR
chr7-23234812-23235873	1.61631e-171	2.78158	0.153	0.023	3.32528e-166	CR352332.1	49161	Intermediate_Epithelial_0dpa_vs_1dpa	DAR
chr9-2725145-2725945	1.77567e-171	-2.43487	0.03	0.155	3.65313e-166	sp3a	36324	Intermediate_Epithelial_0dpa_vs_1dpa	DAR
chr5-65709934-65710981	1.9876e-171	2.19652	0.197	0.046	4.08913e-166	notch1b	0	Intermediate_Epithelial_0dpa_vs_1dpa	DAR
chr8-7796391-7797276	5.57627e-171	-2.8658	0.021	0.127	1.14722e-165	tfe3a	0	Intermediate_Epithelial_0dpa_vs_1dpa	DAR
chr3-24111262-24112042	1.01408e-170	2.22456	0.197	0.043	2.08628e-165	copz2	0	Intermediate_Epithelial_0dpa_vs_1dpa	DAR
chr6-41659617-41661006	1.17604e-170	1.98434	0.226	0.06	2.4195e-165	srgap3	0	Intermediate_Epithelial_0dpa_vs_1dpa	DAR
chr1-20224355-20225651	1.19248e-170	-4.06266	0.007	0.101	2.45331e-165	ndst3	0	Intermediate_Epithelial_0dpa_vs_1dpa	DAR
chr23-26622063-26622837	2.76338e-170	-2.01521	0.051	0.188	5.68517e-165	hspg2	0	Intermediate_Epithelial_0dpa_vs_1dpa	DAR
chr5-60490142-60490885	8.5414e-170	-3.05147	0.016	0.123	1.75724e-164	CR936966.1	26634	Intermediate_Epithelial_0dpa_vs_1dpa	DAR
chr8-50245335-50246518	8.84168e-170	1.8198	0.254	0.072	1.81902e-164	nkx3-1	10411	Intermediate_Epithelial_0dpa_vs_1dpa	DAR
chr18-15912697-15914133	1.26807e-169	1.58449	0.298	0.104	2.60882e-164	plekhg7	0	Intermediate_Epithelial_0dpa_vs_1dpa	DAR
chr18-35880033-35880984	1.85634e-169	2.97609	0.141	0.018	3.81908e-164	ppp1r13l	0	Intermediate_Epithelial_0dpa_vs_1dpa	DAR
chr24-6501295-6503034	1.93606e-169	-3.15534	0.015	0.121	3.98309e-164	gpr158a	83	Intermediate_Epithelial_0dpa_vs_1dpa	DAR
chr13-42519362-42520075	2.23382e-169	-2.90267	0.018	0.129	4.59568e-164	btaf1	0	Intermediate_Epithelial_0dpa_vs_1dpa	DAR
chr9-17556665-17558029	3.12957e-169	-3.75409	0.009	0.104	6.43852e-164	vwa8	0	Intermediate_Epithelial_0dpa_vs_1dpa	DAR
chr11-31330362-31331723	3.31166e-169	1.40886	0.343	0.14	6.81315e-164	sipa1l2	0	Intermediate_Epithelial_0dpa_vs_1dpa	DAR
chr17-21043837-21044964	6.91272e-169	-4.1155	0.006	0.101	1.42217e-163	bicc1a	0	Intermediate_Epithelial_0dpa_vs_1dpa	DAR
chr9-1058430-1059277	1.26372e-168	-3.46741	0.012	0.115	2.59987e-163	DOCK9	0	Intermediate_Epithelial_0dpa_vs_1dpa	DAR
chr14-5450439-5451262	3.54377e-168	-3.97183	0.007	0.1	7.29067e-163	AL831789.1	4444	Intermediate_Epithelial_0dpa_vs_1dpa	DAR
chr16-38733284-38734155	3.57745e-168	-3.26985	0.013	0.113	7.35996e-163	emc2	3677	Intermediate_Epithelial_0dpa_vs_1dpa	DAR
chr22-1210388-1211573	3.98901e-168	-3.1713	0.014	0.117	8.20668e-163	ampd2a	0	Intermediate_Epithelial_0dpa_vs_1dpa	DAR
chr13-13484396-13485597	6.73962e-168	-2.52715	0.03	0.141	1.38656e-162	foxi2	92954	Intermediate_Epithelial_0dpa_vs_1dpa	DAR
chr3-35834515-35835970	6.86136e-168	-2.5521	0.027	0.141	1.4116e-162	crlf3	0	Intermediate_Epithelial_0dpa_vs_1dpa	DAR
chr19-24370208-24370967	7.2904e-168	-3.43121	0.012	0.108	1.49987e-162	sema4ab	0	Intermediate_Epithelial_0dpa_vs_1dpa	DAR
chr5-55000742-55001888	1.09085e-167	-2.88354	0.02	0.126	2.24423e-162	CU467961.1	0	Intermediate_Epithelial_0dpa_vs_1dpa	DAR
chr7-10980318-10983108	2.93886e-167	-2.75317	0.021	0.129	6.04618e-162	BX470137.2	0	Intermediate_Epithelial_0dpa_vs_1dpa	DAR
chr2-3591701-3592576	3.29131e-167	-2.65155	0.025	0.139	6.77128e-162	c1ql3b	2756	Intermediate_Epithelial_0dpa_vs_1dpa	DAR
chr1-10328220-10329480	4.41825e-167	-3.37446	0.012	0.109	9.08976e-162	pip4p1b	3194	Intermediate_Epithelial_0dpa_vs_1dpa	DAR
chr25-11223026-11223931	4.52876e-167	-3.38224	0.012	0.109	9.31711e-162	akap13	0	Intermediate_Epithelial_0dpa_vs_1dpa	DAR
chr2-820030-821822	7.47681e-167	-3.31271	0.014	0.113	1.53822e-161	irf4a	32621	Intermediate_Epithelial_0dpa_vs_1dpa	DAR
chr20-5542567-5543129	1.04692e-166	3.74284	0.11	0.008	2.15385e-161	nrxn3b	19912	Intermediate_Epithelial_0dpa_vs_1dpa	DAR
chr5-32803943-32805205	1.17546e-166	-1.6059	0.094	0.237	2.41829e-161	ptpa	0	Intermediate_Epithelial_0dpa_vs_1dpa	DAR
chr4-15044067-15044811	2.51823e-166	-2.65852	0.025	0.135	5.18081e-161	ube2h	0	Intermediate_Epithelial_0dpa_vs_1dpa	DAR
chr7-28681864-28682628	3.01352e-166	-2.33292	0.035	0.153	6.19978e-161	adgrg1	0	Intermediate_Epithelial_0dpa_vs_1dpa	DAR
chr3-18022920-18023909	5.01726e-166	1.75883	0.26	0.079	1.03221e-160	si:ch73-141c7.1	65	Intermediate_Epithelial_0dpa_vs_1dpa	DAR
chr25-34306602-34307421	7.70355e-166	2.41055	0.177	0.033	1.58487e-160	gcnt3	22457	Intermediate_Epithelial_0dpa_vs_1dpa	DAR
chr10-28212879-28213835	1.64991e-165	-1.53819	0.1	0.238	3.39439e-160	dre-mir-21-1	13837	Intermediate_Epithelial_0dpa_vs_1dpa	DAR
chr11-18976984-18977807	1.85595e-165	-3.72476	0.009	0.103	3.81829e-160	magi1b	0	Intermediate_Epithelial_0dpa_vs_1dpa	DAR
chr18-5617899-5618410	2.301e-165	2.91093	0.142	0.019	4.7339e-160	ulk3	0	Intermediate_Epithelial_0dpa_vs_1dpa	DAR
chr15-42883202-42884578	5.24794e-165	-3.47001	0.012	0.107	1.07967e-159	slc8a2b	0	Intermediate_Epithelial_0dpa_vs_1dpa	DAR
chr8-9118507-9119914	9.30575e-165	-1.35123	0.133	0.289	1.91449e-159	slc6a8	0	Intermediate_Epithelial_0dpa_vs_1dpa	DAR
chr3-5892067-5893126	1.02838e-164	-2.58636	0.026	0.139	2.11571e-159	BX284638.2	0	Intermediate_Epithelial_0dpa_vs_1dpa	DAR
chr8-24853966-24855085	1.0589e-164	-2.5265	0.026	0.133	2.1785e-159	slc6a17	0	Intermediate_Epithelial_0dpa_vs_1dpa	DAR
chr12-19809226-19810050	1.06223e-164	-1.6309	0.088	0.238	2.18536e-159	shisa9a	0	Intermediate_Epithelial_0dpa_vs_1dpa	DAR
chr13-46112121-46112892	1.1824e-164	-2.90541	0.019	0.121	2.43257e-159	marcksl1a	64585	Intermediate_Epithelial_0dpa_vs_1dpa	DAR
chr25-6078912-6079729	2.23851e-164	-3.5438	0.01	0.104	4.60533e-159	cpeb1a	0	Intermediate_Epithelial_0dpa_vs_1dpa	DAR
chr18-39452496-39453282	2.58066e-164	2.39814	0.174	0.033	5.30924e-159	scg3	0	Intermediate_Epithelial_0dpa_vs_1dpa	DAR
chr10-5374674-5375861	2.97943e-164	-2.5195	0.028	0.143	6.12964e-159	ror2	0	Intermediate_Epithelial_0dpa_vs_1dpa	DAR
chr16-10763853-10765295	1.35094e-163	2.24254	0.189	0.04	2.77931e-158	atp1a3b	11392	Intermediate_Epithelial_0dpa_vs_1dpa	DAR
chr14-30737702-30740071	2.37493e-163	1.87921	0.237	0.068	4.88599e-158	fosl1a	0	Intermediate_Epithelial_0dpa_vs_1dpa	DAR
chr8-8395547-8396240	3.08769e-163	-3.09155	0.016	0.118	6.35237e-158	cdk16	0	Intermediate_Epithelial_0dpa_vs_1dpa	DAR
chr17-1416359-1417410	3.53454e-163	-1.2377	0.161	0.321	7.27167e-158	zbtb42	8633	Intermediate_Epithelial_0dpa_vs_1dpa	DAR
chr1-44093556-44095244	5.17307e-163	-1.73776	0.067	0.203	1.06427e-157	vwa11	9484	Intermediate_Epithelial_0dpa_vs_1dpa	DAR
chr15-13996000-13997944	5.27006e-163	1.45168	0.324	0.127	1.08422e-157	zgc:162730	9238	Intermediate_Epithelial_0dpa_vs_1dpa	DAR
chr19-45454228-45455260	6.02805e-163	-3.26151	0.013	0.112	1.24016e-157	trps1	0	Intermediate_Epithelial_0dpa_vs_1dpa	DAR
chr18-50999191-51000606	1.2015e-162	-3.01377	0.018	0.121	2.47187e-157	LO018598.1	0	Intermediate_Epithelial_0dpa_vs_1dpa	DAR
chr20-53250967-53251563	1.40338e-162	2.7084	0.152	0.022	2.88721e-157	FIG4	0	Intermediate_Epithelial_0dpa_vs_1dpa	DAR
chr25-7572107-7573656	1.48923e-162	1.86294	0.237	0.067	3.06382e-157	fuk	0	Intermediate_Epithelial_0dpa_vs_1dpa	DAR
chr17-41023487-41024737	1.74475e-162	-3.63118	0.009	0.101	3.5895e-157	rbks	0	Intermediate_Epithelial_0dpa_vs_1dpa	DAR
chr20-15577582-15578446	3.84341e-162	-2.81428	0.02	0.124	7.90713e-157	si:dkey-86e18.1	0	Intermediate_Epithelial_0dpa_vs_1dpa	DAR
chr10-9094595-9095255	4.97072e-162	-3.23662	0.013	0.11	1.02264e-156	snx18b	0	Intermediate_Epithelial_0dpa_vs_1dpa	DAR
chr25-30960629-30961506	6.03689e-162	3.37609	0.12	0.012	1.24198e-156	CR381618.1	0	Intermediate_Epithelial_0dpa_vs_1dpa	DAR
chr6-40268900-40269869	7.85146e-162	-3.5666	0.009	0.101	1.6153e-156	col7a1	0	Intermediate_Epithelial_0dpa_vs_1dpa	DAR
chr14-49829703-49831756	8.52286e-162	-1.39247	0.125	0.275	1.75343e-156	nfkb1	0	Intermediate_Epithelial_0dpa_vs_1dpa	DAR
chr13-34157156-34157937	1.33623e-161	-3.38136	0.011	0.107	2.74906e-156	macrod2	0	Intermediate_Epithelial_0dpa_vs_1dpa	DAR
chr15-3600921-3602096	1.44734e-161	-1.54666	0.092	0.231	2.97764e-156		0	Intermediate_Epithelial_0dpa_vs_1dpa	DAR
chr24-25388866-25389632	3.99897e-161	-2.60529	0.024	0.134	8.22717e-156	FP103106.1	13375	Intermediate_Epithelial_0dpa_vs_1dpa	DAR
chr18-25828715-25829942	5.84822e-161	-1.76775	0.067	0.204	1.20317e-155	sema4ba	0	Intermediate_Epithelial_0dpa_vs_1dpa	DAR
chr8-26063637-26064292	5.94779e-161	-2.25548	0.037	0.155	1.22365e-155	impdh2	0	Intermediate_Epithelial_0dpa_vs_1dpa	DAR
chr12-34327300-34329426	7.69477e-161	-2.60823	0.025	0.131	1.58306e-155	CU855552.1	32001	Intermediate_Epithelial_0dpa_vs_1dpa	DAR
chr19-28723389-28724342	1.01754e-160	-2.34472	0.032	0.147	2.09341e-155	BX957317.2	0	Intermediate_Epithelial_0dpa_vs_1dpa	DAR
chr3-12977591-12978760	1.21697e-160	-3.19799	0.014	0.112	2.50369e-155	pdgfab	7162	Intermediate_Epithelial_0dpa_vs_1dpa	DAR
chr13-22008439-22009588	1.3235e-160	-1.94274	0.055	0.184	2.72286e-155	ndst2a	0	Intermediate_Epithelial_0dpa_vs_1dpa	DAR
chr21-24420905-24422246	1.32507e-160	-3.31844	0.012	0.107	2.7261e-155	CR759955.2	951	Intermediate_Epithelial_0dpa_vs_1dpa	DAR
chr7-49824862-49826407	1.94757e-160	-2.2814	0.035	0.15	4.00678e-155	PAMR1	0	Intermediate_Epithelial_0dpa_vs_1dpa	DAR
chr24-24276133-24276826	2.21899e-160	1.93307	0.222	0.06	4.56518e-155	pdha1b	0	Intermediate_Epithelial_0dpa_vs_1dpa	DAR
chr25-17262969-17263707	2.78074e-160	-2.39229	0.033	0.144	5.72086e-155	kdm7ab	0	Intermediate_Epithelial_0dpa_vs_1dpa	DAR
chr9-41827361-41828576	3.40271e-160	3.17375	0.126	0.014	7.00045e-155	col18a1a	0	Intermediate_Epithelial_0dpa_vs_1dpa	DAR
chr10-15103074-15104256	9.20356e-160	-3.24709	0.012	0.107	1.89347e-154	scpp8	2551	Intermediate_Epithelial_0dpa_vs_1dpa	DAR
chr24-28482733-28483485	1.17766e-159	-1.34883	0.127	0.278	2.42283e-154	arhgap29a	0	Intermediate_Epithelial_0dpa_vs_1dpa	DAR
chr9-10666754-10668038	2.018e-159	-2.4179	0.03	0.141	4.15168e-154	CR522881.1	0	Intermediate_Epithelial_0dpa_vs_1dpa	DAR
chr23-18421196-18422240	3.146e-159	2.14885	0.196	0.044	6.47234e-154	fam120c	5323	Intermediate_Epithelial_0dpa_vs_1dpa	DAR
chr2-2671870-2672787	3.88092e-159	-2.10639	0.043	0.162	7.98429e-154	serbp1b	29393	Intermediate_Epithelial_0dpa_vs_1dpa	DAR
chr1-1401942-1402957	5.45167e-159	-1.52042	0.1	0.24	1.12158e-153	runx1	0	Intermediate_Epithelial_0dpa_vs_1dpa	DAR
chr24-29586763-29587706	1.09674e-158	2.92821	0.135	0.017	2.25634e-153	vav3a	680	Intermediate_Epithelial_0dpa_vs_1dpa	DAR
chr23-540592-541079	1.22173e-158	3.48983	0.114	0.01	2.51349e-153	samhd1	0	Intermediate_Epithelial_0dpa_vs_1dpa	DAR
chr1-596666-597878	1.59216e-158	-3.61202	0.01	0.101	3.27558e-153	jam2a	0	Intermediate_Epithelial_0dpa_vs_1dpa	DAR
chr17-23567687-23568796	1.95548e-158	-1.93935	0.052	0.185	4.02305e-153	pank1a	0	Intermediate_Epithelial_0dpa_vs_1dpa	DAR
chr18-11394577-11395330	1.98851e-158	-1.75448	0.072	0.201	4.09099e-153	BX936417.1	61882	Intermediate_Epithelial_0dpa_vs_1dpa	DAR
chr17-15695178-15696234	2.26565e-158	-3.32074	0.012	0.103	4.66118e-153	bach2a	0	Intermediate_Epithelial_0dpa_vs_1dpa	DAR
chr15-25581247-25581713	2.30151e-158	-3.03454	0.016	0.115	4.73494e-153	si:dkey-54n8.2	0	Intermediate_Epithelial_0dpa_vs_1dpa	DAR
chr15-21754967-21755889	2.83619e-158	-3.3394	0.012	0.103	5.83494e-153	ppp2r1bb	0	Intermediate_Epithelial_0dpa_vs_1dpa	DAR
chr23-664378-665185	5.21495e-158	-2.25698	0.037	0.156	1.07288e-152	BX323461.1	0	Intermediate_Epithelial_0dpa_vs_1dpa	DAR
chr3-34460869-34461745	1.39977e-157	-2.83058	0.019	0.121	2.87978e-152	sept9a	0	Intermediate_Epithelial_0dpa_vs_1dpa	DAR
chr22-11259759-11260649	2.6445e-157	-3.44387	0.01	0.101	5.44058e-152	BX323453.1	0	Intermediate_Epithelial_0dpa_vs_1dpa	DAR
chr17-43199996-43201100	2.98166e-157	-3.5843	0.009	0.102	6.13423e-152	EML5	0	Intermediate_Epithelial_0dpa_vs_1dpa	DAR
chr13-44868727-44870014	4.08002e-157	-2.52392	0.025	0.129	8.3939e-152	CR786566.2	0	Intermediate_Epithelial_0dpa_vs_1dpa	DAR
chr5-48905802-48906878	5.13646e-157	2.32874	0.174	0.036	1.05673e-151	adgrv1	0	Intermediate_Epithelial_0dpa_vs_1dpa	DAR
chr3-15900212-15902277	5.459e-157	-2.32928	0.034	0.144	1.12309e-151	jpt2	0	Intermediate_Epithelial_0dpa_vs_1dpa	DAR
chr9-43163887-43165685	8.27133e-157	-2.46188	0.029	0.138	1.70168e-151	sestd1	0	Intermediate_Epithelial_0dpa_vs_1dpa	DAR
chr6-46544132-46545074	1.51307e-156	-3.09868	0.014	0.111	3.11287e-151	kcnb1	0	Intermediate_Epithelial_0dpa_vs_1dpa	DAR
chr5-50971542-50972223	2.27882e-156	1.73906	0.254	0.077	4.68826e-151	hmgcra	261	Intermediate_Epithelial_0dpa_vs_1dpa	DAR
chr6-36494265-36495534	2.48329e-156	-2.85007	0.019	0.121	5.10892e-151	BX950188.3	0	Intermediate_Epithelial_0dpa_vs_1dpa	DAR
chr9-20299141-20300067	4.0435e-156	-3.07489	0.015	0.111	8.31877e-151	igsf3	0	Intermediate_Epithelial_0dpa_vs_1dpa	DAR
chr19-32199444-32200397	4.76467e-156	-2.81661	0.018	0.117	9.80244e-151	fam8a1a	1593	Intermediate_Epithelial_0dpa_vs_1dpa	DAR
chr5-51855336-51857064	5.52518e-156	-1.7913	0.066	0.193	1.13671e-150	cmya5	0	Intermediate_Epithelial_0dpa_vs_1dpa	DAR
chr15-37598036-37599405	7.73766e-156	2.59539	0.154	0.025	1.59188e-150	lin37	0	Intermediate_Epithelial_0dpa_vs_1dpa	DAR
chr18-8829679-8831276	1.13498e-155	2.49719	0.159	0.029	2.33501e-150	impdh1a	0	Intermediate_Epithelial_0dpa_vs_1dpa	DAR
chr6-47877674-47879506	1.30372e-155	1.49902	0.295	0.11	2.68216e-150	RAP1GAP	0	Intermediate_Epithelial_0dpa_vs_1dpa	DAR
chr24-6020727-6021366	2.03748e-155	-2.61449	0.024	0.127	4.19175e-150	pdss1	0	Intermediate_Epithelial_0dpa_vs_1dpa	DAR
chr12-11435343-11435958	2.52453e-155	-3.2499	0.012	0.104	5.19376e-150	htra1b	0	Intermediate_Epithelial_0dpa_vs_1dpa	DAR
chr6-43642034-43643434	3.41221e-155	-2.60423	0.023	0.128	7.02001e-150	foxp1b	0	Intermediate_Epithelial_0dpa_vs_1dpa	DAR
chr5-32008235-32009366	3.68146e-155	-2.97265	0.016	0.115	7.57395e-150	scai	0	Intermediate_Epithelial_0dpa_vs_1dpa	DAR
chr25-6181532-6182732	5.95119e-155	1.6993	0.253	0.08	1.22435e-149	oaz2a	4090	Intermediate_Epithelial_0dpa_vs_1dpa	DAR
chr25-7354779-7355346	6.02026e-155	-3.35827	0.011	0.103	1.23856e-149	peak1	0	Intermediate_Epithelial_0dpa_vs_1dpa	DAR
chr1-46822230-46823124	7.20114e-155	-2.7814	0.019	0.119	1.48151e-149	CU986305.1	4766	Intermediate_Epithelial_0dpa_vs_1dpa	DAR
chr12-31219953-31220792	1.05634e-154	2.14261	0.187	0.045	2.17324e-149	vti1a	0	Intermediate_Epithelial_0dpa_vs_1dpa	DAR
chr18-18839012-18839862	1.06876e-154	-3.49832	0.01	0.1	2.19878e-149	tgm2l	0	Intermediate_Epithelial_0dpa_vs_1dpa	DAR
chr21-19563-20906	1.0828e-154	-1.96137	0.055	0.184	2.22768e-149	JMY	0	Intermediate_Epithelial_0dpa_vs_1dpa	DAR
chr20-11128649-11129904	1.35343e-154	2.01327	0.203	0.053	2.78444e-149	flrt2	0	Intermediate_Epithelial_0dpa_vs_1dpa	DAR
chr6-43670579-43671222	3.15012e-154	-2.87942	0.019	0.121	6.4808e-149	foxp1b	0	Intermediate_Epithelial_0dpa_vs_1dpa	DAR
chr7-63415165-63416096	4.06652e-154	-2.31352	0.032	0.142	8.36613e-149	pcdh7b	0	Intermediate_Epithelial_0dpa_vs_1dpa	DAR
chr18-30270450-30271547	5.41271e-154	-3.45518	0.01	0.1	1.11357e-148	gse1	0	Intermediate_Epithelial_0dpa_vs_1dpa	DAR
chr22-37217246-37218314	7.80398e-154	1.78898	0.236	0.07	1.60553e-148	LO018196.1	57639	Intermediate_Epithelial_0dpa_vs_1dpa	DAR
chr17-37926600-37927340	1.08809e-153	-2.5358	0.026	0.129	2.23854e-148	plekhh1	5092	Intermediate_Epithelial_0dpa_vs_1dpa	DAR
chr13-17101476-17102103	1.10184e-153	2.82537	0.136	0.019	2.26683e-148	lrmda	0	Intermediate_Epithelial_0dpa_vs_1dpa	DAR
chr20-26422245-26423232	1.26449e-153	-3.09428	0.016	0.11	2.60145e-148	akap12b	0	Intermediate_Epithelial_0dpa_vs_1dpa	DAR
chr7-17733885-17734615	2.07966e-153	-1.35932	0.126	0.268	4.27853e-148	rtn3	0	Intermediate_Epithelial_0dpa_vs_1dpa	DAR
chr20-29084221-29085731	2.09961e-153	-1.78369	0.068	0.192	4.31957e-148	thbs1b	31829	Intermediate_Epithelial_0dpa_vs_1dpa	DAR
chr25-11215389-11216248	3.01744e-153	-1.82948	0.061	0.183	6.20785e-148	akap13	0	Intermediate_Epithelial_0dpa_vs_1dpa	DAR
chr19-33483820-33485697	4.84961e-153	-2.9519	0.016	0.114	9.97719e-148	triqk	0	Intermediate_Epithelial_0dpa_vs_1dpa	DAR
chr7-66923902-66924681	5.44115e-153	-3.30588	0.011	0.101	1.11942e-147	sbf2	0	Intermediate_Epithelial_0dpa_vs_1dpa	DAR
chr7-39805056-39805895	5.76735e-153	-2.11102	0.041	0.162	1.18653e-147	sorcs2	0	Intermediate_Epithelial_0dpa_vs_1dpa	DAR
chr1-29682073-29682913	8.77052e-153	-2.89988	0.018	0.119	1.80438e-147	raph1b	0	Intermediate_Epithelial_0dpa_vs_1dpa	DAR
chr15-19124324-19124853	9.20575e-153	-3.37765	0.011	0.1	1.89392e-147	arhgap32a	0	Intermediate_Epithelial_0dpa_vs_1dpa	DAR
chr9-41873094-41873927	1.08586e-152	-3.35503	0.012	0.101	2.23397e-147	col18a1a	0	Intermediate_Epithelial_0dpa_vs_1dpa	DAR
chr15-28959502-28960195	1.53848e-152	-3.23838	0.013	0.105	3.16514e-147	gipr	0	Intermediate_Epithelial_0dpa_vs_1dpa	DAR
chr17-28597435-28598616	2.34809e-152	-1.3052	0.125	0.275	4.83076e-147	im:7136021	8800	Intermediate_Epithelial_0dpa_vs_1dpa	DAR
chr23-32894005-32895164	3.52419e-152	-3.337	0.012	0.102	7.25039e-147	plxna2	0	Intermediate_Epithelial_0dpa_vs_1dpa	DAR
chr19-34979239-34980238	6.26152e-152	-1.98057	0.048	0.166	1.28819e-146	ndrg1a	0	Intermediate_Epithelial_0dpa_vs_1dpa	DAR
chr20-34316491-34317630	6.55409e-152	2.3806	0.166	0.031	1.34839e-146	ivns1abpa	3004	Intermediate_Epithelial_0dpa_vs_1dpa	DAR
chr6-29567605-29568763	7.89286e-152	-2.96296	0.015	0.109	1.62381e-146	pex5la	0	Intermediate_Epithelial_0dpa_vs_1dpa	DAR
chr21-19565942-19567274	1.10613e-151	-2.17286	0.037	0.148	2.27566e-146	rai14	0	Intermediate_Epithelial_0dpa_vs_1dpa	DAR
chr5-36334227-36335263	1.333e-151	-1.69624	0.071	0.194	2.74242e-146	efnb1	5538	Intermediate_Epithelial_0dpa_vs_1dpa	DAR
chr7-52356915-52358221	1.92417e-151	-2.64057	0.022	0.123	3.95863e-146	gnrhr2	6526	Intermediate_Epithelial_0dpa_vs_1dpa	DAR
chr5-4195827-4196504	3.37503e-151	3.30869	0.114	0.011	6.94352e-146	si:ch211-283g2.1	0	Intermediate_Epithelial_0dpa_vs_1dpa	DAR
chr7-32892120-32892865	3.67922e-151	-2.59235	0.025	0.13	7.56933e-146	ano5b	0	Intermediate_Epithelial_0dpa_vs_1dpa	DAR
chr6-39352322-39354409	4.05164e-151	-1.61764	0.08	0.207	8.33553e-146	krt18b	5967	Intermediate_Epithelial_0dpa_vs_1dpa	DAR
chr9-34129582-34130467	4.5896e-151	-2.08376	0.044	0.157	9.44228e-146	f5	0	Intermediate_Epithelial_0dpa_vs_1dpa	DAR
chr20-28700169-28701437	4.89181e-151	-1.01022	0.233	0.39	1.0064e-145	sipa1l1	0	Intermediate_Epithelial_0dpa_vs_1dpa	DAR
chr14-29240472-29241543	5.1505e-151	1.92745	0.208	0.057	1.05962e-145	TENM2	0	Intermediate_Epithelial_0dpa_vs_1dpa	DAR
chr16-51043882-51044679	8.99791e-151	-2.84003	0.018	0.116	1.85116e-145	ago3a	0	Intermediate_Epithelial_0dpa_vs_1dpa	DAR
chr9-31371856-31372972	1.04122e-150	-3.07423	0.014	0.111	2.14213e-145	BX571774.1	0	Intermediate_Epithelial_0dpa_vs_1dpa	DAR
chr17-24453277-24454316	1.61227e-150	1.61523	0.263	0.088	3.31695e-145	ugp2b	0	Intermediate_Epithelial_0dpa_vs_1dpa	DAR
chr11-5683944-5685192	1.82019e-150	1.75519	0.24	0.071	3.74471e-145	arid3a	0	Intermediate_Epithelial_0dpa_vs_1dpa	DAR
chr21-30808620-30809902	1.86614e-150	1.37357	0.324	0.13	3.83924e-145	slc6a7	0	Intermediate_Epithelial_0dpa_vs_1dpa	DAR
chr16-35986556-35987514	5.42661e-150	2.85018	0.132	0.019	1.11643e-144	eva1ba	11301	Intermediate_Epithelial_0dpa_vs_1dpa	DAR
chr7-74159302-74160995	6.7226e-150	-1.27401	0.137	0.274	1.38305e-144	ppp1cbl	5109	Intermediate_Epithelial_0dpa_vs_1dpa	DAR
chr5-4796847-4797646	9.645e-150	-2.23365	0.034	0.142	1.98428e-144	angptl2a	9204	Intermediate_Epithelial_0dpa_vs_1dpa	DAR
chr20-28459476-28460623	9.70934e-150	-2.55805	0.025	0.127	1.99752e-144	dpf3	0	Intermediate_Epithelial_0dpa_vs_1dpa	DAR
chr9-19410013-19411054	1.92246e-149	-1.98854	0.049	0.168	3.95511e-144	slc37a1	0	Intermediate_Epithelial_0dpa_vs_1dpa	DAR
chr9-46894076-46895007	1.94551e-149	1.55978	0.273	0.096	4.00253e-144	igfbp5b	51896	Intermediate_Epithelial_0dpa_vs_1dpa	DAR
chr10-28295833-28297481	3.18774e-149	1.39568	0.314	0.127	6.55819e-144	CR392341.5	2873	Intermediate_Epithelial_0dpa_vs_1dpa	DAR
chr25-29496804-29497429	4.06577e-149	2.18379	0.179	0.04	8.3646e-144	il17rel	0	Intermediate_Epithelial_0dpa_vs_1dpa	DAR
chr25-13885349-13886503	4.82147e-149	-2.8032	0.02	0.118	9.9193e-144	cry2	14227	Intermediate_Epithelial_0dpa_vs_1dpa	DAR
chr20-33776502-33777458	7.23757e-149	-2.04652	0.044	0.162	1.489e-143	fam102bb	0	Intermediate_Epithelial_0dpa_vs_1dpa	DAR
chr4-12838451-12839624	1.02086e-148	-2.91615	0.016	0.107	2.10024e-143	hmga2	0	Intermediate_Epithelial_0dpa_vs_1dpa	DAR
chr24-3109950-3110581	1.43442e-148	-2.19159	0.038	0.149	2.95106e-143	inhbaa	47339	Intermediate_Epithelial_0dpa_vs_1dpa	DAR
chr7-11072871-11073719	2.51265e-148	2.44556	0.157	0.029	5.16932e-143	BX470137.2	51970	Intermediate_Epithelial_0dpa_vs_1dpa	DAR
chr4-11704110-11705018	5.49531e-148	-3.17473	0.013	0.103	1.13056e-142	mkln1	0	Intermediate_Epithelial_0dpa_vs_1dpa	DAR
chr14-27913498-27914263	8.69489e-148	2.86642	0.13	0.018	1.78882e-142	tsc22d3	84492	Intermediate_Epithelial_0dpa_vs_1dpa	DAR
chr21-43445278-43446974	1.68857e-147	-1.79662	0.059	0.181	3.47392e-142	stk26	0	Intermediate_Epithelial_0dpa_vs_1dpa	DAR
chr3-36887711-36888800	3.28141e-147	2.94655	0.123	0.017	6.75092e-142	ezh1	0	Intermediate_Epithelial_0dpa_vs_1dpa	DAR
chr18-18479821-18480963	4.7483e-147	1.69741	0.243	0.076	9.76878e-142	lonp2	0	Intermediate_Epithelial_0dpa_vs_1dpa	DAR
chr16-759120-760135	5.59873e-147	2.56243	0.146	0.026	1.15184e-141	irx1a	53644	Intermediate_Epithelial_0dpa_vs_1dpa	DAR
chr14-22034557-22035575	1.2395e-146	2.00766	0.194	0.05	2.55006e-141	ssrp1a	0	Intermediate_Epithelial_0dpa_vs_1dpa	DAR
chr1-5542412-5543279	1.47266e-146	-1.98887	0.046	0.163	3.02974e-141	fn1b	0	Intermediate_Epithelial_0dpa_vs_1dpa	DAR
chr7-23911986-23913072	3.26396e-146	-1.48334	0.096	0.229	6.71501e-141	syt4	0	Intermediate_Epithelial_0dpa_vs_1dpa	DAR
chr10-3993660-3994560	3.49866e-146	-2.95779	0.017	0.111	7.19787e-141	TTC28	0	Intermediate_Epithelial_0dpa_vs_1dpa	DAR
chr4-3201843-3202808	5.67802e-146	-1.58401	0.079	0.202	1.16815e-140	plekha5	56483	Intermediate_Epithelial_0dpa_vs_1dpa	DAR
chr5-4818354-4819223	6.49532e-146	-2.89674	0.016	0.108	1.3363e-140	angptl2a	0	Intermediate_Epithelial_0dpa_vs_1dpa	DAR
chr22-11977062-11977957	7.27928e-146	2.33211	0.162	0.033	1.49758e-140	mgat5	0	Intermediate_Epithelial_0dpa_vs_1dpa	DAR
chr20-22869021-22870500	9.1419e-146	-1.48762	0.093	0.221	1.88078e-140	BX511028.2	0	Intermediate_Epithelial_0dpa_vs_1dpa	DAR
chr3-49619608-49620923	9.17846e-146	2.10431	0.185	0.042	1.8883e-140	CR394535.1	0	Intermediate_Epithelial_0dpa_vs_1dpa	DAR
chr17-12734999-12735730	9.59837e-146	1.75981	0.229	0.07	1.97469e-140	il17a/f2	1140	Intermediate_Epithelial_0dpa_vs_1dpa	DAR
chr16-6144186-6145197	1.67408e-145	-1.96537	0.048	0.161	3.44411e-140	ulk4	0	Intermediate_Epithelial_0dpa_vs_1dpa	DAR
chr11-21349774-21350645	2.315e-145	-1.91722	0.052	0.17	4.7627e-140	RASSF5	0	Intermediate_Epithelial_0dpa_vs_1dpa	DAR
chr25-573941-574925	3.02685e-145	-2.23831	0.034	0.141	6.2272e-140	nell2a	6301	Intermediate_Epithelial_0dpa_vs_1dpa	DAR
chr20-36472128-36472633	3.58883e-145	-2.41873	0.028	0.128	7.38337e-140	enah	0	Intermediate_Epithelial_0dpa_vs_1dpa	DAR
chr5-51993625-51994569	4.37359e-145	-1.91088	0.05	0.17	8.99788e-140	serinc5	0	Intermediate_Epithelial_0dpa_vs_1dpa	DAR
chr14-15765096-15765424	4.6818e-145	2.81355	0.131	0.019	9.63196e-140	dusp1	1447	Intermediate_Epithelial_0dpa_vs_1dpa	DAR
chr6-1884391-1885325	5.35268e-145	-2.45061	0.026	0.128	1.10122e-139	dlgap4b	9726	Intermediate_Epithelial_0dpa_vs_1dpa	DAR
chr8-43655902-43656744	5.36033e-145	-2.48525	0.028	0.128	1.10279e-139	ep400	11731	Intermediate_Epithelial_0dpa_vs_1dpa	DAR
chr10-44314220-44315424	1.09657e-144	-1.32597	0.12	0.269	2.256e-139	zswim6	0	Intermediate_Epithelial_0dpa_vs_1dpa	DAR
chr23-10062439-10063093	1.15495e-144	-2.80608	0.017	0.111	2.37609e-139	plxnb1a	0	Intermediate_Epithelial_0dpa_vs_1dpa	DAR
chr12-28812473-28813752	1.3173e-144	1.06635	0.424	0.219	2.7101e-139	prr15lb	0	Intermediate_Epithelial_0dpa_vs_1dpa	DAR
chr16-28684521-28685305	1.60007e-144	-3.06939	0.014	0.105	3.29185e-139	adam15	0	Intermediate_Epithelial_0dpa_vs_1dpa	DAR
chr13-36309354-36310376	1.67156e-144	-1.9475	0.05	0.161	3.43894e-139	cox16	1517	Intermediate_Epithelial_0dpa_vs_1dpa	DAR
chr7-18593407-18594810	5.07434e-144	-0.988026	0.218	0.378	1.04395e-138	dtx4a	0	Intermediate_Epithelial_0dpa_vs_1dpa	DAR
chr4-1559762-1560482	5.63729e-144	-2.12671	0.041	0.148	1.15977e-138	slc38a4	0	Intermediate_Epithelial_0dpa_vs_1dpa	DAR
chr13-1891547-1892406	6.67475e-144	-2.07115	0.041	0.153	1.37321e-138	bmp5	0	Intermediate_Epithelial_0dpa_vs_1dpa	DAR
chr14-9353988-9355583	7.3332e-144	-1.79625	0.057	0.178	1.50867e-138	tent5d	0	Intermediate_Epithelial_0dpa_vs_1dpa	DAR
chr14-9229297-9230495	7.38082e-144	2.59757	0.141	0.023	1.51847e-138	CR293501.2	15865	Intermediate_Epithelial_0dpa_vs_1dpa	DAR
chr19-29091890-29092895	2.4247e-143	-1.46015	0.092	0.221	4.98838e-138	CU469458.1	110246	Intermediate_Epithelial_0dpa_vs_1dpa	DAR
chr7-7837201-7839323	3.25201e-143	2.25366	0.165	0.036	6.69042e-138	cxcl8b.1	288	Intermediate_Epithelial_0dpa_vs_1dpa	DAR
chr3-25780539-25781651	3.54114e-143	-1.57213	0.074	0.202	7.28526e-138	ntn1b	0	Intermediate_Epithelial_0dpa_vs_1dpa	DAR
chr18-21734528-21735644	1.00641e-142	-1.8613	0.055	0.173	2.07052e-137	pskh1	0	Intermediate_Epithelial_0dpa_vs_1dpa	DAR
chr5-71871730-71872727	1.18693e-142	-2.12485	0.038	0.154	2.44189e-137	CU927890.1	33209	Intermediate_Epithelial_0dpa_vs_1dpa	DAR
chr12-20898248-20900287	2.30325e-142	2.43819	0.153	0.027	4.73853e-137	BX004803.1	12605	Intermediate_Epithelial_0dpa_vs_1dpa	DAR
chr3-41608065-41609375	2.8178e-142	-1.82435	0.055	0.173	5.79712e-137	card11	0	Intermediate_Epithelial_0dpa_vs_1dpa	DAR
chr1-51781178-51782171	3.99033e-142	-1.72028	0.067	0.183	8.20939e-137	BX548032.3	0	Intermediate_Epithelial_0dpa_vs_1dpa	DAR
chr14-2433204-2434959	4.37842e-142	1.60157	0.256	0.086	9.0078e-137	CU855896.1	25363	Intermediate_Epithelial_0dpa_vs_1dpa	DAR
chr16-20879400-20881021	7.32014e-142	1.80426	0.219	0.064	1.50599e-136	hibadhb	0	Intermediate_Epithelial_0dpa_vs_1dpa	DAR
chr24-15186996-15187985	1.30185e-141	-1.56207	0.083	0.213	2.67832e-136	rttn	0	Intermediate_Epithelial_0dpa_vs_1dpa	DAR
chr12-26795886-26796786	1.36612e-141	-2.04856	0.044	0.156	2.81055e-136	zeb1b	0	Intermediate_Epithelial_0dpa_vs_1dpa	DAR
chr4-8054044-8055164	2.79827e-141	-2.10453	0.036	0.146	5.75695e-136	wnk1b	0	Intermediate_Epithelial_0dpa_vs_1dpa	DAR
chr23-19563787-19564740	7.58038e-141	-2.35759	0.031	0.13	1.55953e-135	atp6ap1lb	0	Intermediate_Epithelial_0dpa_vs_1dpa	DAR
chr1-46797112-46798397	9.32e-141	-1.33723	0.113	0.246	1.91742e-135	CU986305.1	29493	Intermediate_Epithelial_0dpa_vs_1dpa	DAR
chr11-35921321-35922261	1.46842e-140	-2.55516	0.023	0.118	3.02101e-135	itpr1b	0	Intermediate_Epithelial_0dpa_vs_1dpa	DAR
chr15-9255650-9257513	2.68678e-140	-1.39688	0.105	0.234	5.52757e-135	calm3a	0	Intermediate_Epithelial_0dpa_vs_1dpa	DAR
chr24-8068025-8068883	2.91989e-140	3.23067	0.109	0.012	6.00715e-135	CABZ01077956.1	64842	Intermediate_Epithelial_0dpa_vs_1dpa	DAR
chr15-33497953-33498826	3.571e-140	-1.82793	0.054	0.174	7.34669e-135	stard13b	0	Intermediate_Epithelial_0dpa_vs_1dpa	DAR
chr8-11843158-11844707	3.59845e-140	-1.80945	0.059	0.174	7.40316e-135	rapgef1a	7550	Intermediate_Epithelial_0dpa_vs_1dpa	DAR
chr23-40221856-40223009	7.01874e-140	-2.18117	0.034	0.141	1.44398e-134	tgm1l3	11592	Intermediate_Epithelial_0dpa_vs_1dpa	DAR
chr7-41861395-41862108	9.64959e-140	-2.96265	0.015	0.103	1.98523e-134	mylk3	2881	Intermediate_Epithelial_0dpa_vs_1dpa	DAR
chr5-53683847-53684780	9.69869e-140	-3.09423	0.013	0.1	1.99533e-134	taf6	0	Intermediate_Epithelial_0dpa_vs_1dpa	DAR
chr22-20053823-20054669	1.80679e-139	2.86	0.124	0.017	3.71716e-134	celf5a	42218	Intermediate_Epithelial_0dpa_vs_1dpa	DAR
chr18-39933943-39934612	2.04356e-139	-2.96289	0.015	0.101	4.20425e-134	si:ch211-282k23.2	2612	Intermediate_Epithelial_0dpa_vs_1dpa	DAR
chr2-54823941-54824832	2.0581e-139	-2.5224	0.023	0.119	4.23417e-134	twsg1a	0	Intermediate_Epithelial_0dpa_vs_1dpa	DAR
chr15-302936-303751	3.03035e-139	-2.59692	0.022	0.116	6.2344e-134	BX640522.2	12428	Intermediate_Epithelial_0dpa_vs_1dpa	DAR
chr7-54156699-54157670	5.42668e-139	-1.65377	0.072	0.191	1.11644e-133	csnk1g1	0	Intermediate_Epithelial_0dpa_vs_1dpa	DAR
chr14-450635-451991	6.88905e-139	-1.62037	0.078	0.193	1.4173e-133	FAT4	0	Intermediate_Epithelial_0dpa_vs_1dpa	DAR
chr5-37346547-37346989	1.18432e-138	-2.96588	0.015	0.102	2.43653e-133	klhl13	0	Intermediate_Epithelial_0dpa_vs_1dpa	DAR
chr12-13155121-13156633	2.46653e-138	-2.1866	0.034	0.138	5.07444e-133	cmn	0	Intermediate_Epithelial_0dpa_vs_1dpa	DAR
chr11-24250467-24251895	4.50668e-138	-1.6499	0.071	0.195	9.27169e-133	pnp4a	0	Intermediate_Epithelial_0dpa_vs_1dpa	DAR
chr9-8494523-8495782	5.50229e-138	1.75116	0.223	0.068	1.132e-132	irs2b	40462	Intermediate_Epithelial_0dpa_vs_1dpa	DAR
chr7-33022325-33024099	5.76279e-138	-2.21422	0.035	0.137	1.18559e-132	cd81a	0	Intermediate_Epithelial_0dpa_vs_1dpa	DAR
chr19-24339952-24340922	6.58669e-138	-1.91368	0.048	0.158	1.35509e-132	sema4ab	0	Intermediate_Epithelial_0dpa_vs_1dpa	DAR
chr16-30011687-30012854	8.61143e-138	-2.00146	0.041	0.154	1.77165e-132	CR847566.1	0	Intermediate_Epithelial_0dpa_vs_1dpa	DAR
chr15-37343161-37344336	8.93377e-138	-1.86174	0.053	0.166	1.83796e-132		2281	Intermediate_Epithelial_0dpa_vs_1dpa	DAR
chr8-32701125-32702048	1.03779e-137	3.07156	0.113	0.013	2.13507e-132	hmcn2	0	Intermediate_Epithelial_0dpa_vs_1dpa	DAR
chr3-62075812-62076644	1.18978e-137	-2.5453	0.022	0.118	2.44775e-132	srebf1	0	Intermediate_Epithelial_0dpa_vs_1dpa	DAR
chr15-43255306-43256305	1.4298e-137	-2.9404	0.014	0.104	2.94155e-132	serpine2	0	Intermediate_Epithelial_0dpa_vs_1dpa	DAR
chr5-23686038-23687219	1.51394e-137	-2.9688	0.015	0.102	3.11467e-132	rnf128a	0	Intermediate_Epithelial_0dpa_vs_1dpa	DAR
chr24-36400908-36401515	1.54487e-137	2.23998	0.162	0.034	3.17828e-132	arf2b	449	Intermediate_Epithelial_0dpa_vs_1dpa	DAR
chr5-34556157-34556793	1.73182e-137	-2.42747	0.026	0.13	3.56291e-132	aif1l	0	Intermediate_Epithelial_0dpa_vs_1dpa	DAR
chr21-21288468-21289239	2.1784e-137	3.39628	0.1	0.01	4.48167e-132	itpkca	0	Intermediate_Epithelial_0dpa_vs_1dpa	DAR
chr6-14661624-14662848	4.17027e-137	-2.16702	0.034	0.136	8.57958e-132	pou3f3b	287101	Intermediate_Epithelial_0dpa_vs_1dpa	DAR
chr3-44840086-44841146	4.41245e-137	-2.84601	0.018	0.108	9.07782e-132	CR385066.1	46890	Intermediate_Epithelial_0dpa_vs_1dpa	DAR
chr12-1924450-1925601	8.54577e-137	2.01799	0.183	0.045	1.75814e-131	sox9a	21991	Intermediate_Epithelial_0dpa_vs_1dpa	DAR
chr2-42829828-42831549	9.58354e-137	-1.85559	0.051	0.161	1.97164e-131	adcy8	0	Intermediate_Epithelial_0dpa_vs_1dpa	DAR
chr2-24035226-24036579	1.24651e-136	-2.10085	0.037	0.139	2.56448e-131	slc12a7a	0	Intermediate_Epithelial_0dpa_vs_1dpa	DAR
chr12-35054397-35055759	1.31038e-136	-1.94795	0.046	0.15	2.69587e-131	zgc:112285	0	Intermediate_Epithelial_0dpa_vs_1dpa	DAR
chr8-8115383-8116541	1.54655e-136	-2.71046	0.019	0.108	3.18175e-131	abcd1	31039	Intermediate_Epithelial_0dpa_vs_1dpa	DAR
chr24-37920104-37921793	1.90866e-136	1.64088	0.236	0.078	3.92672e-131	ccdc78	0	Intermediate_Epithelial_0dpa_vs_1dpa	DAR
chr18-38078138-38078856	2.76676e-136	2.92813	0.116	0.015	5.69211e-131	luzp2	0	Intermediate_Epithelial_0dpa_vs_1dpa	DAR
chr2-44066252-44067665	2.93753e-136	-2.91709	0.015	0.102	6.04344e-131	cadm3	0	Intermediate_Epithelial_0dpa_vs_1dpa	DAR
chr11-39490533-39491580	3.10365e-136	-2.44234	0.025	0.12	6.38521e-131	CR847998.1	146159	Intermediate_Epithelial_0dpa_vs_1dpa	DAR
chr11-2141234-2141946	3.93821e-136	-2.18821	0.033	0.135	8.10216e-131	calcoco1b	9953	Intermediate_Epithelial_0dpa_vs_1dpa	DAR
chr16-51211339-51212260	4.29361e-136	1.81735	0.209	0.06	8.83332e-131	FQ323156.1	0	Intermediate_Epithelial_0dpa_vs_1dpa	DAR
chr23-25706353-25707227	7.45994e-136	-1.56318	0.08	0.2	1.53475e-130	rbms2b	1559	Intermediate_Epithelial_0dpa_vs_1dpa	DAR
chr24-37916566-37917027	8.34488e-136	2.59717	0.133	0.022	1.71681e-130	ccdc78	0	Intermediate_Epithelial_0dpa_vs_1dpa	DAR
chr12-3504202-3504963	9.26008e-136	-2.86511	0.016	0.106	1.9051e-130	TANC2	50612	Intermediate_Epithelial_0dpa_vs_1dpa	DAR
chr22-38682857-38685005	1.02528e-135	-2.17935	0.036	0.134	2.10932e-130	BX088728.3	6995	Intermediate_Epithelial_0dpa_vs_1dpa	DAR
chr19-1798668-1798974	1.02826e-135	-2.39801	0.027	0.123	2.11547e-130	ptk2aa	0	Intermediate_Epithelial_0dpa_vs_1dpa	DAR
chr3-37689545-37691304	1.22006e-135	-2.31967	0.03	0.126	2.51006e-130	gpatch8	0	Intermediate_Epithelial_0dpa_vs_1dpa	DAR
chr12-23547816-23548795	1.32126e-135	-2.59391	0.02	0.113	2.71826e-130	BX005058.2	0	Intermediate_Epithelial_0dpa_vs_1dpa	DAR
chr1-1502215-1503177	1.32724e-135	-1.46642	0.091	0.222	2.73056e-130	dre-mir-459	72305	Intermediate_Epithelial_0dpa_vs_1dpa	DAR
chr6-39314754-39315248	1.70015e-135	-2.16636	0.034	0.135	3.49776e-130	krt4	1726	Intermediate_Epithelial_0dpa_vs_1dpa	DAR
chr1-51273458-51275140	1.72151e-135	-1.93531	0.048	0.151	3.5417e-130	kif16ba	7063	Intermediate_Epithelial_0dpa_vs_1dpa	DAR
chr4-20884859-20886056	1.92658e-135	-1.96557	0.044	0.153	3.9636e-130	nav3	0	Intermediate_Epithelial_0dpa_vs_1dpa	DAR
chr11-13850428-13852285	2.31704e-135	-2.55458	0.021	0.112	4.76689e-130	AL928649.1	12560	Intermediate_Epithelial_0dpa_vs_1dpa	DAR
chr21-23282044-23283497	2.9134e-135	2.47337	0.142	0.026	5.99379e-130	zbtb16a	0	Intermediate_Epithelial_0dpa_vs_1dpa	DAR
chr1-52488424-52489338	3.02203e-135	2.13564	0.169	0.039	6.21728e-130	acy3.2	623	Intermediate_Epithelial_0dpa_vs_1dpa	DAR
chr12-7346260-7347135	4.05061e-135	3.01889	0.113	0.014	8.33339e-130	bicc1b	52267	Intermediate_Epithelial_0dpa_vs_1dpa	DAR
chr21-113989-115876	5.67873e-135	-2.35593	0.028	0.126	1.1683e-129	zer1	0	Intermediate_Epithelial_0dpa_vs_1dpa	DAR
chr7-36145657-36146793	7.80344e-135	1.27238	0.329	0.144	1.60542e-129	fto	0	Intermediate_Epithelial_0dpa_vs_1dpa	DAR
chr7-33788868-33789694	8.75265e-135	2.18206	0.166	0.036	1.8007e-129	uacab	8436	Intermediate_Epithelial_0dpa_vs_1dpa	DAR
chr4-12859950-12860771	9.26809e-135	-2.68565	0.019	0.108	1.90674e-129	hmga2	0	Intermediate_Epithelial_0dpa_vs_1dpa	DAR
chr5-32603621-32604485	2.60649e-134	-2.45492	0.026	0.119	5.36238e-129	CR376857.2	21524	Intermediate_Epithelial_0dpa_vs_1dpa	DAR
chr18-38927890-38928662	3.55039e-134	-1.4831	0.086	0.215	7.30429e-129	myo5aa	0	Intermediate_Epithelial_0dpa_vs_1dpa	DAR
chr7-22362207-22363300	3.82968e-134	-2.66405	0.018	0.108	7.87887e-129	fgf11a	0	Intermediate_Epithelial_0dpa_vs_1dpa	DAR
chr11-4110129-4111071	4.19471e-134	1.88093	0.197	0.055	8.62986e-129	BX571768.1	0	Intermediate_Epithelial_0dpa_vs_1dpa	DAR
chr12-3638869-3639715	4.58799e-134	2.0602	0.174	0.042	9.43897e-129	CABZ01069040.1	12299	Intermediate_Epithelial_0dpa_vs_1dpa	DAR
chr19-32343259-32344120	4.63949e-134	-1.95189	0.047	0.15	9.54491e-129	atxn1a	0	Intermediate_Epithelial_0dpa_vs_1dpa	DAR
chr1-46587771-46588903	1.45397e-133	-1.83444	0.05	0.16	2.99128e-128	mcf2la	0	Intermediate_Epithelial_0dpa_vs_1dpa	DAR
chr3-32823032-32824183	1.59055e-133	-1.67914	0.064	0.179	3.27227e-128	zgc:153733	0	Intermediate_Epithelial_0dpa_vs_1dpa	DAR
chr9-44764967-44765889	1.59865e-133	-2.09125	0.036	0.138	3.28894e-128	nckap1	0	Intermediate_Epithelial_0dpa_vs_1dpa	DAR
chr11-10890716-10891843	1.98621e-133	-1.49404	0.087	0.218	4.08628e-128	rbms1a	17339	Intermediate_Epithelial_0dpa_vs_1dpa	DAR
chr6-13312593-13313538	2.10979e-133	1.29466	0.318	0.132	4.34051e-128	kcnj3b	3779	Intermediate_Epithelial_0dpa_vs_1dpa	DAR
chr23-10845369-10846081	2.84888e-133	-2.39389	0.025	0.12	5.86105e-128	pdzrn3a	0	Intermediate_Epithelial_0dpa_vs_1dpa	DAR
chr6-19020230-19021074	3.17841e-133	-2.8746	0.016	0.104	6.539e-128	sept9b	0	Intermediate_Epithelial_0dpa_vs_1dpa	DAR
chr10-33636967-33637803	3.53971e-133	2.78714	0.122	0.018	7.28232e-128	b3glctb	0	Intermediate_Epithelial_0dpa_vs_1dpa	DAR
chr17-34060654-34061662	8.00062e-133	-2.32617	0.029	0.127	1.64598e-127	gphna	0	Intermediate_Epithelial_0dpa_vs_1dpa	DAR
chr12-22830429-22831657	9.87699e-133	-1.48922	0.087	0.208	2.03201e-127	afap1	0	Intermediate_Epithelial_0dpa_vs_1dpa	DAR
chr12-5882219-5883161	1.00443e-132	2.01244	0.18	0.045	2.06643e-127	BX294177.1	0	Intermediate_Epithelial_0dpa_vs_1dpa	DAR
chr6-40702996-40704112	1.54774e-132	-1.50119	0.083	0.203	3.18421e-127	si:ch211-157b11.12	3049	Intermediate_Epithelial_0dpa_vs_1dpa	DAR
chr25-11412840-11415108	1.91547e-132	2.65877	0.128	0.02	3.94073e-127	agbl1	0	Intermediate_Epithelial_0dpa_vs_1dpa	DAR
chr11-23477429-23478020	2.31347e-132	-2.73707	0.018	0.104	4.75955e-127	plekha6	0	Intermediate_Epithelial_0dpa_vs_1dpa	DAR
chr24-38740515-38741442	3.28909e-132	1.9236	0.195	0.05	6.7667e-127	ntn2	0	Intermediate_Epithelial_0dpa_vs_1dpa	DAR
chr22-15360346-15362166	4.95425e-132	2.43965	0.141	0.025	1.01925e-126	rrp36	7799	Intermediate_Epithelial_0dpa_vs_1dpa	DAR
chr16-49867829-49869130	5.63983e-132	1.39569	0.283	0.113	1.16029e-126	znf385d	21469	Intermediate_Epithelial_0dpa_vs_1dpa	DAR
chr19-906952-907750	8.42123e-132	-2.46099	0.025	0.116	1.73252e-126	tgfbr2a	10101	Intermediate_Epithelial_0dpa_vs_1dpa	DAR
chr20-7825578-7826495	1.27689e-131	-2.64454	0.019	0.11	2.62698e-126	si:dkey-19f4.2	24235	Intermediate_Epithelial_0dpa_vs_1dpa	DAR
chr20-20819234-20819690	1.50368e-131	-2.49328	0.024	0.114	3.09356e-126	ckbb	0	Intermediate_Epithelial_0dpa_vs_1dpa	DAR
chr15-37131512-37132513	1.90725e-131	1.75485	0.213	0.065	3.92382e-126	aplp1	0	Intermediate_Epithelial_0dpa_vs_1dpa	DAR
chr12-40669655-40670792	2.47992e-131	2.78773	0.119	0.018	5.10199e-126	LO018644.1	8864	Intermediate_Epithelial_0dpa_vs_1dpa	DAR
chr22-38620936-38621990	2.99784e-131	-1.92881	0.045	0.145	6.16751e-126	nppc	0	Intermediate_Epithelial_0dpa_vs_1dpa	DAR
chr20-25001712-25002895	3.40511e-131	-2.23125	0.032	0.128	7.00541e-126	epha7	38619	Intermediate_Epithelial_0dpa_vs_1dpa	DAR
chr20-37906434-37907342	4.24903e-131	2.06692	0.169	0.042	8.74161e-126	vash2	0	Intermediate_Epithelial_0dpa_vs_1dpa	DAR
chr23-36560437-36561383	5.32372e-131	2.05768	0.172	0.042	1.09526e-125	spryd3	0	Intermediate_Epithelial_0dpa_vs_1dpa	DAR
chr21-41150756-41152455	6.92859e-131	0.879621	0.497	0.294	1.42543e-125	msx2b	2937	Intermediate_Epithelial_0dpa_vs_1dpa	DAR
chr19-6622532-6623555	9.50792e-131	-2.88237	0.015	0.1	1.95608e-125	pvrl2l	0	Intermediate_Epithelial_0dpa_vs_1dpa	DAR
chr7-38906055-38907141	1.22169e-130	1.77349	0.21	0.061	2.5134e-125	creb3l1	0	Intermediate_Epithelial_0dpa_vs_1dpa	DAR
chr6-34854061-34855854	1.33517e-130	-1.70226	0.064	0.174	2.74687e-125	slc35d1a	0	Intermediate_Epithelial_0dpa_vs_1dpa	DAR
chr13-28129560-28130653	2.07579e-130	-2.33571	0.028	0.121	4.27057e-125	smap1	0	Intermediate_Epithelial_0dpa_vs_1dpa	DAR
chr4-11861804-11862478	2.89677e-130	-2.5465	0.021	0.107	5.95959e-125	btbd11a	0	Intermediate_Epithelial_0dpa_vs_1dpa	DAR
chr10-4077781-4079009	3.14743e-130	2.7908	0.118	0.018	6.47528e-125	pitpnb	0	Intermediate_Epithelial_0dpa_vs_1dpa	DAR
chr5-29862481-29863324	3.45026e-130	-2.16334	0.034	0.132	7.0983e-125	ubash3ba	0	Intermediate_Epithelial_0dpa_vs_1dpa	DAR
chr6-42397396-42398694	1.08671e-129	-1.88938	0.044	0.149	2.23571e-124	sec61a1l	8787	Intermediate_Epithelial_0dpa_vs_1dpa	DAR
chr8-37096731-37097374	1.23958e-129	-2.39934	0.025	0.116	2.55021e-124	zgc:162200	0	Intermediate_Epithelial_0dpa_vs_1dpa	DAR
chr24-24250555-24251557	2.8736e-129	-1.68561	0.061	0.178	5.91192e-124	rps6ka3b	0	Intermediate_Epithelial_0dpa_vs_1dpa	DAR
chr9-24339527-24341146	3.5044e-129	-2.65193	0.018	0.105	7.20967e-124	tmeff2a	0	Intermediate_Epithelial_0dpa_vs_1dpa	DAR
chr19-25227670-25228501	3.79315e-129	-2.1682	0.031	0.132	7.80372e-124	rims3	0	Intermediate_Epithelial_0dpa_vs_1dpa	DAR
chr1-188566-191080	5.69852e-129	-1.17458	0.142	0.273	1.17237e-123	grtp1a	0	Intermediate_Epithelial_0dpa_vs_1dpa	DAR
chr8-10791327-10792628	1.72542e-128	2.18485	0.159	0.035	3.54973e-123	mapk13	30440	Intermediate_Epithelial_0dpa_vs_1dpa	DAR
chr23-23619472-23620255	1.72713e-128	-1.27538	0.116	0.238	3.55325e-123	agrn	0	Intermediate_Epithelial_0dpa_vs_1dpa	DAR
chr20-189631-190615	2.12842e-128	-2.78796	0.016	0.101	4.37885e-123	cx28.8	0	Intermediate_Epithelial_0dpa_vs_1dpa	DAR
chr12-24189763-24191113	2.39625e-128	2.70819	0.123	0.018	4.92985e-123	AL928656.1	23287	Intermediate_Epithelial_0dpa_vs_1dpa	DAR
chr13-45460796-45461588	3.39868e-128	2.78916	0.116	0.017	6.99218e-123	rsrp1	6814	Intermediate_Epithelial_0dpa_vs_1dpa	DAR
chr15-44779973-44781222	1.44584e-127	-1.50003	0.081	0.207	2.97456e-122	gria4a	0	Intermediate_Epithelial_0dpa_vs_1dpa	DAR
chr8-33129920-33132124	2.12716e-127	1.64451	0.226	0.074	4.37626e-122	zbtb34	377	Intermediate_Epithelial_0dpa_vs_1dpa	DAR
chr6-31159489-31160418	2.43861e-127	-2.81937	0.016	0.101	5.017e-122	CR847887.1	12233	Intermediate_Epithelial_0dpa_vs_1dpa	DAR
chr18-25169456-25170751	2.48343e-127	-1.66676	0.063	0.177	5.10921e-122	slco3a1	0	Intermediate_Epithelial_0dpa_vs_1dpa	DAR
chr21-19554070-19555176	2.52443e-127	-2.50603	0.022	0.109	5.19355e-122	rai14	0	Intermediate_Epithelial_0dpa_vs_1dpa	DAR
chr6-56170965-56172050	2.7788e-127	-1.55729	0.074	0.185	5.71688e-122	tfap2c	0	Intermediate_Epithelial_0dpa_vs_1dpa	DAR
chr17-37190456-37191192	2.82276e-127	-2.03168	0.039	0.139	5.80733e-122	asxl2	0	Intermediate_Epithelial_0dpa_vs_1dpa	DAR
chr18-8860365-8861316	3.44605e-127	-2.29714	0.029	0.125	7.08963e-122	prrt4	3227	Intermediate_Epithelial_0dpa_vs_1dpa	DAR
chr2-35773844-35774783	4.09504e-127	1.31048	0.301	0.126	8.4248e-122	rasal2	0	Intermediate_Epithelial_0dpa_vs_1dpa	DAR
chr20-15277885-15279086	5.25972e-127	1.84032	0.194	0.054	1.08209e-121	prdx6	93015	Intermediate_Epithelial_0dpa_vs_1dpa	DAR
chr13-1473519-1473959	1.00881e-126	-2.22313	0.031	0.124	2.07544e-121	si:ch211-165e15.1	0	Intermediate_Epithelial_0dpa_vs_1dpa	DAR
chr6-24028077-24028902	1.05238e-126	1.54383	0.246	0.086	2.16509e-121	GNG12	0	Intermediate_Epithelial_0dpa_vs_1dpa	DAR
chr11-37821057-37821812	1.13884e-126	2.35624	0.141	0.028	2.34296e-121	sox13	0	Intermediate_Epithelial_0dpa_vs_1dpa	DAR
chr8-29755416-29756074	1.14851e-126	-1.618	0.068	0.184	2.36286e-121	mapk4	0	Intermediate_Epithelial_0dpa_vs_1dpa	DAR
chr7-8194610-8196128	1.33254e-126	2.82258	0.112	0.015	2.74147e-121	si:ch211-163c2.1	26074	Intermediate_Epithelial_0dpa_vs_1dpa	DAR
chr14-49389319-49389960	1.34313e-126	-1.88406	0.046	0.152	2.76325e-121	tnip1	0	Intermediate_Epithelial_0dpa_vs_1dpa	DAR
chr7-72282917-72283735	2.51077e-126	-2.11747	0.033	0.131	5.16547e-121	tollip	0	Intermediate_Epithelial_0dpa_vs_1dpa	DAR
chr6-43679631-43680358	2.56064e-126	-2.08218	0.035	0.137	5.26805e-121	foxp1b	0	Intermediate_Epithelial_0dpa_vs_1dpa	DAR
chr11-30648682-30649058	2.80413e-126	2.50961	0.131	0.023	5.76899e-121	tpcn3	0	Intermediate_Epithelial_0dpa_vs_1dpa	DAR
chr5-46179197-46179767	5.43684e-126	-2.0078	0.038	0.137	1.11853e-120	iqgap2	0	Intermediate_Epithelial_0dpa_vs_1dpa	DAR
chr7-32412512-32413812	7.00294e-126	-2.74725	0.018	0.101	1.44073e-120	lgr4	0	Intermediate_Epithelial_0dpa_vs_1dpa	DAR
chr11-214785-215495	1.12137e-125	-2.49694	0.022	0.109	2.30701e-120	dusp7	5048	Intermediate_Epithelial_0dpa_vs_1dpa	DAR
chr9-6415411-6416209	1.24738e-125	-2.40421	0.023	0.115	2.56627e-120	nck2a	0	Intermediate_Epithelial_0dpa_vs_1dpa	DAR
chr5-69397378-69398713	1.30463e-125	-2.55922	0.02	0.106	2.68404e-120	FQ311924.1	18748	Intermediate_Epithelial_0dpa_vs_1dpa	DAR
chr4-11285804-11287501	2.09809e-125	1.894	0.184	0.052	4.31645e-120	BX649349.1	0	Intermediate_Epithelial_0dpa_vs_1dpa	DAR
chr8-406584-407296	3.35221e-125	-2.52997	0.021	0.112	6.89656e-120	trim36	0	Intermediate_Epithelial_0dpa_vs_1dpa	DAR
chr25-28505174-28507165	3.79788e-125	-1.56084	0.072	0.181	7.81346e-120	CR356235.1	1208	Intermediate_Epithelial_0dpa_vs_1dpa	DAR
chr16-4303845-4304376	4.28405e-125	-2.60851	0.019	0.103	8.81367e-120	vegfaa	0	Intermediate_Epithelial_0dpa_vs_1dpa	DAR
chr16-35968197-35969123	5.45343e-125	2.34471	0.142	0.029	1.12195e-119	eva1ba	0	Intermediate_Epithelial_0dpa_vs_1dpa	DAR
chr7-61647583-61649003	7.05259e-125	-1.47078	0.082	0.195	1.45094e-119	lrch4	0	Intermediate_Epithelial_0dpa_vs_1dpa	DAR
chr11-31443871-31444762	8.77742e-125	-1.2935	0.111	0.231	1.8058e-119	sipa1l2	0	Intermediate_Epithelial_0dpa_vs_1dpa	DAR
chr1-62999-63575	1.05335e-124	-2.01374	0.039	0.135	2.16708e-119	si:zfos-1011f11.2	0	Intermediate_Epithelial_0dpa_vs_1dpa	DAR
chr19-40882383-40883603	1.6589e-124	1.39934	0.271	0.107	3.41288e-119	zgc:85777	0	Intermediate_Epithelial_0dpa_vs_1dpa	DAR
chr15-28519958-28521353	2.59114e-124	-2.19055	0.032	0.127	5.3308e-119	ankrd13b	0	Intermediate_Epithelial_0dpa_vs_1dpa	DAR
chr1-5555832-5557385	2.95911e-124	-1.8268	0.049	0.149	6.08784e-119	fn1b	12766	Intermediate_Epithelial_0dpa_vs_1dpa	DAR
chr13-24933875-24935382	4.56763e-124	2.01031	0.17	0.043	9.39708e-119	adka	0	Intermediate_Epithelial_0dpa_vs_1dpa	DAR
chr3-39401953-39402830	4.59691e-124	2.55174	0.127	0.021	9.45732e-119	CU464118.1	0	Intermediate_Epithelial_0dpa_vs_1dpa	DAR
chr8-13904271-13905729	5.15409e-124	-2.04282	0.038	0.137	1.06036e-118	doc2d	0	Intermediate_Epithelial_0dpa_vs_1dpa	DAR
chr7-24463454-24465089	9.19439e-124	-2.22468	0.03	0.12	1.89158e-118	nat8l	0	Intermediate_Epithelial_0dpa_vs_1dpa	DAR
chr15-14632287-14633619	1.59251e-123	-2.4319	0.023	0.106	3.27631e-118	si:dkey-260j18.2	0	Intermediate_Epithelial_0dpa_vs_1dpa	DAR
chr9-18655513-18655955	1.73651e-123	-2.50224	0.021	0.11	3.57256e-118	BX957328.1	47243	Intermediate_Epithelial_0dpa_vs_1dpa	DAR
chr11-206550-207594	2.6844e-123	-2.2916	0.027	0.115	5.52267e-118	dusp7	12949	Intermediate_Epithelial_0dpa_vs_1dpa	DAR
chr12-29978986-29980090	2.68816e-123	-2.20984	0.031	0.123	5.53041e-118	atrnl1b	0	Intermediate_Epithelial_0dpa_vs_1dpa	DAR
chr2-37006447-37007785	3.18564e-123	-1.23163	0.123	0.246	6.55388e-118	gng7	0	Intermediate_Epithelial_0dpa_vs_1dpa	DAR
chr17-25316569-25317399	3.99951e-123	-2.45594	0.022	0.104	8.22828e-118	pabpc4	0	Intermediate_Epithelial_0dpa_vs_1dpa	DAR
chr22-30208652-30209996	4.13221e-123	-2.46876	0.023	0.111	8.50129e-118	add3a	0	Intermediate_Epithelial_0dpa_vs_1dpa	DAR
chr9-22593056-22594588	5.41441e-123	2.14302	0.159	0.035	1.11392e-117	dgkg	0	Intermediate_Epithelial_0dpa_vs_1dpa	DAR
chr6-18219597-18221152	5.70725e-123	-1.43234	0.085	0.202	1.17416e-117	p4hb	0	Intermediate_Epithelial_0dpa_vs_1dpa	DAR
chr7-30666240-30667568	5.9929e-123	-1.7071	0.055	0.167	1.23293e-117	myo1ea	0	Intermediate_Epithelial_0dpa_vs_1dpa	DAR
chr24-9386674-9388492	6.08834e-123	-2.05889	0.035	0.13	1.25257e-117	si:ch211-285f17.1	0	Intermediate_Epithelial_0dpa_vs_1dpa	DAR
chr24-2620518-2621607	7.47993e-123	-1.76717	0.054	0.159	1.53886e-117	fars2	0	Intermediate_Epithelial_0dpa_vs_1dpa	DAR
chr14-39521858-39523128	1.16059e-122	2.74608	0.115	0.017	2.3877e-117	diaph2	0	Intermediate_Epithelial_0dpa_vs_1dpa	DAR
chr9-23007747-23008255	1.40971e-122	2.95221	0.106	0.014	2.90023e-117	eaf2	0	Intermediate_Epithelial_0dpa_vs_1dpa	DAR
chr13-45109356-45110561	1.93027e-122	0.919159	0.448	0.255	3.97119e-117	runx3	0	Intermediate_Epithelial_0dpa_vs_1dpa	DAR
chr20-15307604-15308817	2.14739e-122	1.32322	0.291	0.12	4.41786e-117	prdx6	122734	Intermediate_Epithelial_0dpa_vs_1dpa	DAR
chr6-53171960-53172744	2.17349e-122	-2.58128	0.019	0.106	4.47157e-117	slc38a3b	0	Intermediate_Epithelial_0dpa_vs_1dpa	DAR
chr18-19997240-19998824	2.62413e-122	-2.29988	0.027	0.114	5.39868e-117	pias1b	0	Intermediate_Epithelial_0dpa_vs_1dpa	DAR
chr13-46177134-46179760	2.73708e-122	-1.43498	0.085	0.198	5.63105e-117	marcksl1a	0	Intermediate_Epithelial_0dpa_vs_1dpa	DAR
chr6-7017231-7018193	2.99478e-122	-2.40413	0.025	0.113	6.16122e-117	bin1b	0	Intermediate_Epithelial_0dpa_vs_1dpa	DAR
chr22-5965546-5966902	3.34988e-122	2.34758	0.136	0.027	6.89178e-117	BX322587.2	0	Intermediate_Epithelial_0dpa_vs_1dpa	DAR
chr25-30957795-30958777	3.67089e-122	3.0082	0.104	0.013	7.5522e-117	CR381618.1	0	Intermediate_Epithelial_0dpa_vs_1dpa	DAR
chr5-39760010-39761869	4.57301e-122	-1.96916	0.04	0.135	9.40814e-117	rasgef1ba	0	Intermediate_Epithelial_0dpa_vs_1dpa	DAR
chr18-9823568-9824399	5.35595e-122	-2.21589	0.027	0.122	1.10189e-116	CACNA2D1	0	Intermediate_Epithelial_0dpa_vs_1dpa	DAR
chr13-32854204-32854985	1.26639e-121	-2.06242	0.034	0.126	2.60538e-116	rock2a	0	Intermediate_Epithelial_0dpa_vs_1dpa	DAR
chr11-22613382-22614608	1.6228e-121	-2.16788	0.03	0.122	3.33862e-116	myog	7400	Intermediate_Epithelial_0dpa_vs_1dpa	DAR
chr16-27357557-27358124	1.68741e-121	-1.81171	0.046	0.143	3.47154e-116	CR524821.1	0	Intermediate_Epithelial_0dpa_vs_1dpa	DAR
chr23-9213781-9214686	2.06958e-121	2.47938	0.128	0.023	4.25779e-116	si:dkey-66g10.2	2483	Intermediate_Epithelial_0dpa_vs_1dpa	DAR
chr4-1584257-1584837	2.19841e-121	2.63594	0.121	0.019	4.52282e-116	AL929171.1	0	Intermediate_Epithelial_0dpa_vs_1dpa	DAR
chr5-23813387-23814391	3.87604e-121	2.87305	0.108	0.015	7.97426e-116	si:ch211-135f11.6	4054	Intermediate_Epithelial_0dpa_vs_1dpa	DAR
chr4-26335304-26336527	5.2942e-121	1.0619	0.374	0.191	1.08919e-115	st8sia1	12467	Intermediate_Epithelial_0dpa_vs_1dpa	DAR
chr18-40846674-40847687	8.68853e-121	-2.05405	0.034	0.125	1.78751e-115	vaspb	0	Intermediate_Epithelial_0dpa_vs_1dpa	DAR
chr5-24377860-24379638	8.98233e-121	1.76147	0.197	0.062	1.84795e-115	znf703	44175	Intermediate_Epithelial_0dpa_vs_1dpa	DAR
chr6-39323416-39324928	1.33536e-120	-1.79973	0.05	0.154	2.74727e-115	krt4	10388	Intermediate_Epithelial_0dpa_vs_1dpa	DAR
chr7-68416506-68417031	1.34056e-120	-2.2533	0.028	0.115	2.75796e-115	CU468723.4	0	Intermediate_Epithelial_0dpa_vs_1dpa	DAR
chr7-33634090-33635741	2.1989e-120	-1.62601	0.063	0.168	4.52385e-115	tle3b	8692	Intermediate_Epithelial_0dpa_vs_1dpa	DAR
chr15-29181453-29183002	2.45791e-120	-1.0652	0.164	0.291	5.05672e-115	BX537104.1	0	Intermediate_Epithelial_0dpa_vs_1dpa	DAR
chr19-27997370-27998399	3.64623e-120	-2.3827	0.024	0.112	7.50145e-115	med10	23218	Intermediate_Epithelial_0dpa_vs_1dpa	DAR
chr7-37950763-37951909	3.69192e-120	1.77896	0.194	0.058	7.59545e-115	heatr3	31287	Intermediate_Epithelial_0dpa_vs_1dpa	DAR
chr2-3192488-3193571	4.26132e-120	-0.97017	0.196	0.325	8.7669e-115	wnt9a	7773	Intermediate_Epithelial_0dpa_vs_1dpa	DAR
chr19-30823012-30825095	4.53032e-120	1.98046	0.168	0.043	9.32032e-115	myclb	11850	Intermediate_Epithelial_0dpa_vs_1dpa	DAR
chr7-19221541-19222290	5.85555e-120	2.52115	0.125	0.021	1.20467e-114	dock11	0	Intermediate_Epithelial_0dpa_vs_1dpa	DAR
chr8-33003534-33004441	6.58556e-120	-1.97321	0.04	0.135	1.35486e-114	ralgps1	0	Intermediate_Epithelial_0dpa_vs_1dpa	DAR
chr14-16821598-16823410	8.36542e-120	1.82717	0.188	0.052	1.72103e-114	limch1b	0	Intermediate_Epithelial_0dpa_vs_1dpa	DAR
chr13-33275569-33276601	1.65843e-119	1.42148	0.259	0.098	3.41192e-114	tmem39b	0	Intermediate_Epithelial_0dpa_vs_1dpa	DAR
chr2-35618147-35619464	2.57494e-119	-2.1345	0.03	0.119	5.29747e-114	FP015808.1	0	Intermediate_Epithelial_0dpa_vs_1dpa	DAR
chr17-35890669-35891767	7.5831e-119	-1.87692	0.042	0.137	1.56009e-113	sox11a	8827	Intermediate_Epithelial_0dpa_vs_1dpa	DAR
chr17-24489433-24490732	1.41541e-118	-1.43076	0.089	0.204	2.91196e-113	peli1b	0	Intermediate_Epithelial_0dpa_vs_1dpa	DAR
chr8-50693426-50694457	1.43402e-118	-1.71906	0.055	0.162	2.95024e-113	PEBP4	0	Intermediate_Epithelial_0dpa_vs_1dpa	DAR
chr22-36313595-36314617	1.90656e-118	2.28618	0.14	0.028	3.92241e-113	LO016985.1	145116	Intermediate_Epithelial_0dpa_vs_1dpa	DAR
chr10-26260912-26262188	2.29276e-118	-1.79261	0.048	0.152	4.71693e-113	dchs1b	6601	Intermediate_Epithelial_0dpa_vs_1dpa	DAR
chr20-27772460-27774014	3.72221e-118	-1.85524	0.044	0.139	7.65777e-113	BX255917.1	0	Intermediate_Epithelial_0dpa_vs_1dpa	DAR
chr5-54403718-54404500	5.40407e-118	-2.2968	0.025	0.114	1.11179e-112	bspry	0	Intermediate_Epithelial_0dpa_vs_1dpa	DAR
chr19-31536747-31537402	8.36091e-118	-2.50122	0.022	0.104	1.72011e-112	tmem64	0	Intermediate_Epithelial_0dpa_vs_1dpa	DAR
chr8-10516461-10517371	8.40094e-118	-2.21378	0.027	0.111	1.72834e-112	tafa5l	44550	Intermediate_Epithelial_0dpa_vs_1dpa	DAR
chr18-44311825-44312900	9.4213e-118	1.5187	0.237	0.08	1.93826e-112	si:ch211-151h10.2	0	Intermediate_Epithelial_0dpa_vs_1dpa	DAR
chr4-2027056-2027892	1.11015e-117	1.28876	0.293	0.122	2.28393e-112	FAR2	0	Intermediate_Epithelial_0dpa_vs_1dpa	DAR
chr10-27691921-27692991	1.86824e-117	2.10562	0.153	0.035	3.84357e-112	auts2a	0	Intermediate_Epithelial_0dpa_vs_1dpa	DAR
chr14-21330819-21332399	2.20642e-117	2.01066	0.166	0.041	4.53931e-112	egr1	122	Intermediate_Epithelial_0dpa_vs_1dpa	DAR
chr3-54717586-54718791	2.59046e-117	-1.41101	0.086	0.192	5.32941e-112	icam3	25277	Intermediate_Epithelial_0dpa_vs_1dpa	DAR
chr24-4273375-4274157	2.80766e-117	-1.83216	0.045	0.141	5.77625e-112	BX004842.1	44021	Intermediate_Epithelial_0dpa_vs_1dpa	DAR
chr12-4330680-4331681	3.65671e-117	1.87083	0.179	0.048	7.52302e-112	ca15a	0	Intermediate_Epithelial_0dpa_vs_1dpa	DAR
chr6-58426104-58428347	4.19223e-117	-1.66083	0.061	0.17	8.62476e-112	kcnq2b	0	Intermediate_Epithelial_0dpa_vs_1dpa	DAR
chr25-9420509-9421140	4.25786e-117	-2.42278	0.023	0.111	8.75978e-112	AL935322.1	96060	Intermediate_Epithelial_0dpa_vs_1dpa	DAR
chr9-52270267-52270965	5.61265e-117	-1.44994	0.078	0.186	1.1547e-111	tanc1b	0	Intermediate_Epithelial_0dpa_vs_1dpa	DAR
chr24-9524112-9525431	5.65175e-117	-2.02738	0.037	0.124	1.16275e-111	si:ch211-285f17.1	0	Intermediate_Epithelial_0dpa_vs_1dpa	DAR
chr21-2086575-2087668	7.08445e-117	2.11197	0.153	0.035	1.4575e-111	si:rp71-1h20.9	4226	Intermediate_Epithelial_0dpa_vs_1dpa	DAR
chr5-43773038-43773948	7.2437e-117	1.89431	0.174	0.047	1.49026e-111	nos2a	8318	Intermediate_Epithelial_0dpa_vs_1dpa	DAR
chr25-17268325-17269459	7.30749e-117	1.90844	0.177	0.046	1.50338e-111	kdm7ab	0	Intermediate_Epithelial_0dpa_vs_1dpa	DAR
chr12-21983549-21984551	9.2717e-117	2.04146	0.159	0.038	1.90749e-111	thrab	0	Intermediate_Epithelial_0dpa_vs_1dpa	DAR
chr3-5217214-5218008	2.29948e-116	-1.48723	0.075	0.186	4.73077e-111	myh9b	0	Intermediate_Epithelial_0dpa_vs_1dpa	DAR
chr20-16188820-16189792	2.76558e-116	0.954906	0.417	0.226	5.68967e-111	zyg11	0	Intermediate_Epithelial_0dpa_vs_1dpa	DAR
chr23-41751653-41752269	2.78746e-116	1.29303	0.283	0.121	5.73469e-111	stk35	0	Intermediate_Epithelial_0dpa_vs_1dpa	DAR
chr9-30766974-30768110	3.14936e-116	2.49986	0.121	0.021	6.47925e-111	klf12b	0	Intermediate_Epithelial_0dpa_vs_1dpa	DAR
chr3-26867344-26868403	3.72956e-116	1.98965	0.164	0.041	7.6729e-111	clec16a	0	Intermediate_Epithelial_0dpa_vs_1dpa	DAR
chr14-22040717-22042380	5.82309e-116	0.814472	0.498	0.313	1.198e-110	ssrp1a	0	Intermediate_Epithelial_0dpa_vs_1dpa	DAR
chr4-3054203-3055181	7.59763e-116	-1.82166	0.044	0.141	1.56308e-110	plekha5	0	Intermediate_Epithelial_0dpa_vs_1dpa	DAR
chr5-11050195-11051574	8.67997e-116	-2.3432	0.023	0.108	1.78575e-110	rtn4r	103815	Intermediate_Epithelial_0dpa_vs_1dpa	DAR
chr7-52662638-52663798	1.45477e-115	2.35644	0.13	0.025	2.99292e-110	tcf12	0	Intermediate_Epithelial_0dpa_vs_1dpa	DAR
chr1-45804686-45806031	1.50635e-115	1.36769	0.266	0.103	3.09904e-110	pkn1a	0	Intermediate_Epithelial_0dpa_vs_1dpa	DAR
chr9-8594824-8595935	2.08209e-115	1.25711	0.298	0.125	4.28352e-110	col4a1	38293	Intermediate_Epithelial_0dpa_vs_1dpa	DAR
chr6-50556402-50557324	3.6597e-115	1.52122	0.231	0.084	7.52918e-110	mtss1	23615	Intermediate_Epithelial_0dpa_vs_1dpa	DAR
chr18-34894828-34895852	4.17823e-115	-2.02217	0.034	0.121	8.59596e-110	LO018333.1	0	Intermediate_Epithelial_0dpa_vs_1dpa	DAR
chr25-20638789-20639482	5.34781e-115	-2.44844	0.021	0.103	1.10021e-109	csk	0	Intermediate_Epithelial_0dpa_vs_1dpa	DAR
chr9-36993577-36994418	8.54175e-115	-2.04666	0.033	0.124	1.75731e-109	inhbb	18697	Intermediate_Epithelial_0dpa_vs_1dpa	DAR
chr1-36075905-36077028	9.95451e-115	-1.69288	0.06	0.162	2.04796e-109	znf827	0	Intermediate_Epithelial_0dpa_vs_1dpa	DAR
chr7-24776211-24777364	9.95461e-115	-1.09295	0.146	0.273	2.04798e-109	shroom4	0	Intermediate_Epithelial_0dpa_vs_1dpa	DAR
chr24-2906344-2907634	1.25625e-114	-2.32127	0.023	0.106	2.58451e-109	dipk1c	0	Intermediate_Epithelial_0dpa_vs_1dpa	DAR
chr18-39773380-39774225	1.4083e-114	-1.9093	0.042	0.135	2.89732e-109	dmxl2	0	Intermediate_Epithelial_0dpa_vs_1dpa	DAR
chr20-43906528-43908239	1.92533e-114	-1.7478	0.049	0.142	3.96103e-109	mark3b	0	Intermediate_Epithelial_0dpa_vs_1dpa	DAR
chr18-26917181-26917939	2.61159e-114	-1.95467	0.039	0.133	5.37287e-109	tspan3a	0	Intermediate_Epithelial_0dpa_vs_1dpa	DAR
chr5-43781562-43782393	2.6876e-114	1.895	0.171	0.046	5.52926e-109	nos2a	0	Intermediate_Epithelial_0dpa_vs_1dpa	DAR
chr17-13376754-13377898	3.1394e-114	-2.21197	0.027	0.11	6.45876e-109	BX005308.2	0	Intermediate_Epithelial_0dpa_vs_1dpa	DAR
chr12-43687969-43689999	3.60812e-114	1.06646	0.363	0.183	7.42305e-109	CU914622.1	2048	Intermediate_Epithelial_0dpa_vs_1dpa	DAR
chr2-17312641-17314156	3.68978e-114	2.16371	0.142	0.032	7.59107e-109	st3gal3b	0	Intermediate_Epithelial_0dpa_vs_1dpa	DAR
chr5-44396424-44398044	3.70949e-114	-2.37721	0.023	0.1	7.6316e-109	BX950187.1	22419	Intermediate_Epithelial_0dpa_vs_1dpa	DAR
chr8-52143889-52144815	3.73852e-114	-2.13491	0.029	0.116	7.69132e-109	tcf7l1b	0	Intermediate_Epithelial_0dpa_vs_1dpa	DAR
chr11-34269226-34270428	3.78827e-114	1.32535	0.274	0.112	7.79369e-109	FO681390.1	14005	Intermediate_Epithelial_0dpa_vs_1dpa	DAR
chr18-8604320-8606497	4.20876e-114	-0.957947	0.174	0.293	8.65876e-109	FRMD4A	24412	Intermediate_Epithelial_0dpa_vs_1dpa	DAR
chr7-60263441-60264911	4.23236e-114	-1.12063	0.13	0.252	8.70732e-109	plcb3	0	Intermediate_Epithelial_0dpa_vs_1dpa	DAR
chr17-37682546-37683537	4.61965e-114	1.28512	0.283	0.122	9.50411e-109	tmem229b	32717	Intermediate_Epithelial_0dpa_vs_1dpa	DAR
chr15-18320277-18321125	4.95925e-114	1.384	0.258	0.103	1.02028e-108	zbtb16b	0	Intermediate_Epithelial_0dpa_vs_1dpa	DAR
chr5-23305010-23306113	5.44724e-114	2.78512	0.106	0.015	1.12067e-108	nlgn3b	0	Intermediate_Epithelial_0dpa_vs_1dpa	DAR
chr12-32972310-32973716	6.62278e-114	1.41783	0.247	0.093	1.36252e-108	rbfox3a	0	Intermediate_Epithelial_0dpa_vs_1dpa	DAR
chr25-34297008-34297873	7.2214e-114	1.71456	0.193	0.062	1.48567e-108	gcnt3	12863	Intermediate_Epithelial_0dpa_vs_1dpa	DAR
chr18-8691643-8693012	1.1099e-113	1.57681	0.217	0.074	2.28343e-108	FRMD4A	111735	Intermediate_Epithelial_0dpa_vs_1dpa	DAR
chr21-39272427-39273479	1.23152e-113	-1.91352	0.04	0.129	2.53364e-108	CU442763.1	5120	Intermediate_Epithelial_0dpa_vs_1dpa	DAR
chr17-30614049-30615258	1.25727e-113	1.87546	0.173	0.048	2.5866e-108	sh3yl1	0	Intermediate_Epithelial_0dpa_vs_1dpa	DAR
chr15-9548286-9550050	1.93643e-113	-1.872	0.041	0.136	3.98385e-108	gab2	0	Intermediate_Epithelial_0dpa_vs_1dpa	DAR
chr24-19958230-19958939	2.43166e-113	-1.63966	0.057	0.156	5.00271e-108	LIMD2	27492	Intermediate_Epithelial_0dpa_vs_1dpa	DAR
chr18-15749496-15751320	2.59643e-113	1.82969	0.179	0.051	5.34168e-108	si:ch211-219a15.4	7054	Intermediate_Epithelial_0dpa_vs_1dpa	DAR
chr19-14362120-14363046	2.65193e-113	-1.763	0.05	0.152	5.45586e-108	arid1ab	0	Intermediate_Epithelial_0dpa_vs_1dpa	DAR
chr7-20697219-20698302	3.43427e-113	1.98574	0.16	0.039	7.06538e-108	chd3	0	Intermediate_Epithelial_0dpa_vs_1dpa	DAR
chr18-14372365-14373281	3.63236e-113	-1.53541	0.07	0.174	7.47293e-108	si:dkey-246g23.2	0	Intermediate_Epithelial_0dpa_vs_1dpa	DAR
chr1-5502038-5504000	3.76853e-113	-1.7513	0.05	0.138	7.75308e-108	atic	0	Intermediate_Epithelial_0dpa_vs_1dpa	DAR
chr17-28031288-28031883	3.96984e-113	-2.34175	0.024	0.104	8.16723e-108	luzp1	0	Intermediate_Epithelial_0dpa_vs_1dpa	DAR
chr5-33324510-33325743	4.52515e-113	-2.13289	0.03	0.113	9.30969e-108	usp20	0	Intermediate_Epithelial_0dpa_vs_1dpa	DAR
chr14-313098-314300	7.07686e-113	-1.82533	0.045	0.144	1.45594e-107	LO018022.2	0	Intermediate_Epithelial_0dpa_vs_1dpa	DAR
chr7-24148560-24149877	9.86526e-113	-1.71592	0.051	0.145	2.0296e-107	mmp14a	0	Intermediate_Epithelial_0dpa_vs_1dpa	DAR
chr17-26969828-26970874	1.0417e-112	1.51595	0.226	0.083	2.14312e-107	grhl3	0	Intermediate_Epithelial_0dpa_vs_1dpa	DAR
chr7-29863297-29864801	1.21502e-112	-1.65827	0.056	0.158	2.49968e-107	tln2a	0	Intermediate_Epithelial_0dpa_vs_1dpa	DAR
chr16-34299668-34300426	2.43596e-112	1.9988	0.159	0.038	5.01155e-107	AL954327.1	0	Intermediate_Epithelial_0dpa_vs_1dpa	DAR
chr15-39649670-39650580	3.55515e-112	1.78694	0.181	0.055	7.31408e-107	robo1	0	Intermediate_Epithelial_0dpa_vs_1dpa	DAR
chr25-34841365-34841808	4.19845e-112	2.10779	0.146	0.033	8.63756e-107	gabarapl2	0	Intermediate_Epithelial_0dpa_vs_1dpa	DAR
chr12-43537693-43538932	4.33239e-112	-2.26818	0.025	0.108	8.91311e-107	ptprea	0	Intermediate_Epithelial_0dpa_vs_1dpa	DAR
chr9-13880963-13881949	7.23539e-112	-1.36498	0.087	0.198	1.48855e-106	RAPH1	0	Intermediate_Epithelial_0dpa_vs_1dpa	DAR
chr13-35410255-35411078	1.02612e-111	-1.97789	0.034	0.123	2.11106e-106	slx4ip	0	Intermediate_Epithelial_0dpa_vs_1dpa	DAR
chr12-22606361-22607831	1.11424e-111	-1.95798	0.038	0.126	2.29234e-106	capgb	0	Intermediate_Epithelial_0dpa_vs_1dpa	DAR
chr7-28481185-28482239	1.4371e-111	2.55843	0.114	0.019	2.95658e-106	dennd2b	0	Intermediate_Epithelial_0dpa_vs_1dpa	DAR
chr24-2984859-2985663	2.39071e-111	-2.27697	0.026	0.108	4.91845e-106	eci2	12819	Intermediate_Epithelial_0dpa_vs_1dpa	DAR
chr17-37638740-37639539	3.18866e-111	2.11404	0.143	0.034	6.5601e-106	tmem229b	0	Intermediate_Epithelial_0dpa_vs_1dpa	DAR
chr6-52448457-52450047	3.63032e-111	2.15614	0.141	0.032	7.46872e-106	fam83c	18091	Intermediate_Epithelial_0dpa_vs_1dpa	DAR
chr8-12307192-12308322	4.11048e-111	2.31353	0.131	0.026	8.45657e-106	phf19	31924	Intermediate_Epithelial_0dpa_vs_1dpa	DAR
chr3-21285231-21286360	4.20471e-111	-1.55904	0.065	0.171	8.65044e-106	fam171a2a	0	Intermediate_Epithelial_0dpa_vs_1dpa	DAR
chr5-32026431-32027648	7.84576e-111	-1.95946	0.038	0.129	1.61412e-105	scai	0	Intermediate_Epithelial_0dpa_vs_1dpa	DAR
chr15-43193272-43194393	8.14417e-111	-2.35623	0.022	0.102	1.67552e-105	flj13639	0	Intermediate_Epithelial_0dpa_vs_1dpa	DAR
chr18-50287007-50287938	9.16362e-111	-2.05078	0.032	0.119	1.88525e-105	insyn1	0	Intermediate_Epithelial_0dpa_vs_1dpa	DAR
chr14-22314058-22314958	9.17567e-111	2.07471	0.146	0.034	1.88773e-105	atp10b	0	Intermediate_Epithelial_0dpa_vs_1dpa	DAR
chr2-24615466-24617030	1.14546e-110	-1.25743	0.1	0.212	2.35659e-105	crtc1a	12140	Intermediate_Epithelial_0dpa_vs_1dpa	DAR
chr13-17092899-17094077	2.25e-110	2.52287	0.115	0.021	4.62897e-105	lrmda	0	Intermediate_Epithelial_0dpa_vs_1dpa	DAR
chr13-46166542-46167799	2.48618e-110	-1.6385	0.056	0.157	5.11487e-105	marcksl1a	9678	Intermediate_Epithelial_0dpa_vs_1dpa	DAR
chr17-24583825-24584462	3.77604e-110	1.71815	0.187	0.058	7.76853e-105	aftphb	0	Intermediate_Epithelial_0dpa_vs_1dpa	DAR
chr3-23485809-23486545	4.0052e-110	-1.0996	0.139	0.256	8.23997e-105	nr1d1	2106	Intermediate_Epithelial_0dpa_vs_1dpa	DAR
chr1-59615-61112	5.51252e-110	-1.55842	0.068	0.163	1.1341e-104	si:zfos-1011f11.2	0	Intermediate_Epithelial_0dpa_vs_1dpa	DAR
chr10-7616182-7617826	5.56946e-110	1.53316	0.22	0.077	1.14582e-104	ppp2cb	0	Intermediate_Epithelial_0dpa_vs_1dpa	DAR
chr7-18033256-18034308	8.03851e-110	1.39204	0.251	0.095	1.65378e-104	ehbp1l1a	0	Intermediate_Epithelial_0dpa_vs_1dpa	DAR
chr20-39784411-39784793	8.87524e-110	-1.94613	0.038	0.127	1.82592e-104	rnf217	0	Intermediate_Epithelial_0dpa_vs_1dpa	DAR
chr15-31254144-31255325	9.38381e-110	-1.44428	0.075	0.174	1.93055e-104	vezf1b	0	Intermediate_Epithelial_0dpa_vs_1dpa	DAR
chr20-53544267-53545208	1.14186e-109	2.03976	0.149	0.036	2.34916e-104	pak6b	0	Intermediate_Epithelial_0dpa_vs_1dpa	DAR
chr21-3760317-3761652	1.21863e-109	-1.53435	0.064	0.171	2.5071e-104	scamp1	0	Intermediate_Epithelial_0dpa_vs_1dpa	DAR
chr6-7315658-7316791	1.25637e-109	-1.27169	0.105	0.214	2.58475e-104	BX663606.1	0	Intermediate_Epithelial_0dpa_vs_1dpa	DAR
chr16-20531349-20532927	1.53428e-109	2.21576	0.134	0.029	3.15649e-104	creb5b	0	Intermediate_Epithelial_0dpa_vs_1dpa	DAR
chr1-18888100-18889096	1.58024e-109	-1.84276	0.04	0.132	3.25106e-104	rnf38	0	Intermediate_Epithelial_0dpa_vs_1dpa	DAR
chr14-34903659-34905567	1.63115e-109	1.40418	0.247	0.095	3.3558e-104	il12ba	45634	Intermediate_Epithelial_0dpa_vs_1dpa	DAR
chr6-40422225-40423591	2.17892e-109	1.76196	0.176	0.053	4.48274e-104	si:dkey-28n18.9	0	Intermediate_Epithelial_0dpa_vs_1dpa	DAR
chr1-40682315-40683653	2.27066e-109	1.60366	0.205	0.068	4.67148e-104	FO834828.2	0	Intermediate_Epithelial_0dpa_vs_1dpa	DAR
chr6-53287410-53288508	2.45092e-109	1.27087	0.284	0.119	5.04233e-104	cysltr3	0	Intermediate_Epithelial_0dpa_vs_1dpa	DAR
chr25-12803295-12804082	2.67566e-109	2.19731	0.138	0.029	5.50469e-104	ca5a	0	Intermediate_Epithelial_0dpa_vs_1dpa	DAR
chr9-39781295-39782299	2.98731e-109	1.68178	0.193	0.059	6.14586e-104	erbb4b	157121	Intermediate_Epithelial_0dpa_vs_1dpa	DAR
chr7-34705929-34706894	3.18536e-109	-2.13239	0.028	0.109	6.5533e-104	plekhg4	0	Intermediate_Epithelial_0dpa_vs_1dpa	DAR
chr25-20647223-20647908	3.27411e-109	-1.81367	0.044	0.133	6.7359e-104	csk	0	Intermediate_Epithelial_0dpa_vs_1dpa	DAR
chr21-37714813-37716639	4.25937e-109	-1.60664	0.057	0.155	8.76289e-104	mpp1	0	Intermediate_Epithelial_0dpa_vs_1dpa	DAR
chr6-9698686-9700455	4.39005e-109	2.06689	0.144	0.035	9.03174e-104	fzd7b	3265	Intermediate_Epithelial_0dpa_vs_1dpa	DAR
chr13-1989206-1990267	4.43932e-109	-2.30666	0.024	0.102	9.13311e-104	gfral	702	Intermediate_Epithelial_0dpa_vs_1dpa	DAR
chr4-4261211-4262831	7.63697e-109	-0.844278	0.228	0.351	1.57117e-103	cd9b	0	Intermediate_Epithelial_0dpa_vs_1dpa	DAR
chr22-36071928-36072484	8.22869e-109	1.83388	0.17	0.048	1.6929e-103	LO016985.1	83481	Intermediate_Epithelial_0dpa_vs_1dpa	DAR
chr5-46324294-46325107	9.8435e-109	-2.06468	0.033	0.118	2.02512e-103	si:ch211-130m23.5	2097	Intermediate_Epithelial_0dpa_vs_1dpa	DAR
chr17-45836290-45837303	1.18139e-108	0.977035	0.388	0.206	2.4305e-103	kif26ab	0	Intermediate_Epithelial_0dpa_vs_1dpa	DAR
chr7-41782762-41783976	1.27644e-108	-1.86636	0.04	0.129	2.62605e-103	vps35	0	Intermediate_Epithelial_0dpa_vs_1dpa	DAR
chr23-27416737-27418114	1.32405e-108	0.804618	0.484	0.302	2.72399e-103	dip2ba	0	Intermediate_Epithelial_0dpa_vs_1dpa	DAR
chr7-35115464-35116783	1.65326e-108	1.92925	0.16	0.044	3.40129e-103	hsd11b2	0	Intermediate_Epithelial_0dpa_vs_1dpa	DAR
chr15-3416519-3417585	2.18434e-108	-1.6567	0.055	0.147	4.49389e-103	cog6	36943	Intermediate_Epithelial_0dpa_vs_1dpa	DAR
chr5-36222925-36223835	2.36318e-108	1.64873	0.196	0.063	4.86182e-103	efnb1	47180	Intermediate_Epithelial_0dpa_vs_1dpa	DAR
chr11-37797051-37798128	2.43527e-108	1.5079	0.222	0.08	5.01014e-103	sox13	0	Intermediate_Epithelial_0dpa_vs_1dpa	DAR
chr12-34345837-34346705	4.15779e-108	1.46334	0.228	0.087	8.5539e-103	tha1	32027	Intermediate_Epithelial_0dpa_vs_1dpa	DAR
chr18-9493171-9493968	4.83534e-108	-2.11369	0.029	0.114	9.94784e-103	sema3e	0	Intermediate_Epithelial_0dpa_vs_1dpa	DAR
chr3-54799714-54800891	5.55106e-108	-1.36007	0.084	0.193	1.14203e-102	sc:d0202	0	Intermediate_Epithelial_0dpa_vs_1dpa	DAR
chr14-41361962-41362838	5.95837e-108	1.69435	0.191	0.057	1.22583e-102	cstf2	0	Intermediate_Epithelial_0dpa_vs_1dpa	DAR
chr23-33914610-33916983	7.48051e-108	-2.07828	0.031	0.113	1.53898e-102	cs	0	Intermediate_Epithelial_0dpa_vs_1dpa	DAR
chr1-55202178-55203274	8.39506e-108	-1.38493	0.082	0.188	1.72713e-102	mri1	0	Intermediate_Epithelial_0dpa_vs_1dpa	DAR
chr8-16393169-16394802	8.73656e-108	-2.05598	0.03	0.12	1.79739e-102	faf1	0	Intermediate_Epithelial_0dpa_vs_1dpa	DAR
chr19-15555878-15557214	9.16686e-108	1.68527	0.191	0.06	1.88592e-102	foxo6b	14075	Intermediate_Epithelial_0dpa_vs_1dpa	DAR
chr6-35264720-35266364	1.13658e-107	-1.707	0.048	0.144	2.3383e-102	nos1apa	0	Intermediate_Epithelial_0dpa_vs_1dpa	DAR
chr5-29534493-29535127	1.45902e-107	-2.31251	0.024	0.101	3.00168e-102	AL831768.1	0	Intermediate_Epithelial_0dpa_vs_1dpa	DAR
chr1-3246972-3247864	1.48358e-107	-2.27972	0.024	0.102	3.0522e-102	gpc5a	0	Intermediate_Epithelial_0dpa_vs_1dpa	DAR
chr5-62979162-62980553	1.52102e-107	1.83856	0.166	0.047	3.12922e-102	specc1	0	Intermediate_Epithelial_0dpa_vs_1dpa	DAR
chr24-4260230-4260974	1.8196e-107	-1.39685	0.08	0.178	3.74349e-102	BX004842.1	57204	Intermediate_Epithelial_0dpa_vs_1dpa	DAR
chr15-35924360-35925675	2.00666e-107	-0.998397	0.166	0.284	4.12835e-102	irs1	0	Intermediate_Epithelial_0dpa_vs_1dpa	DAR
chr5-64201343-64203284	2.49334e-107	-1.97173	0.037	0.125	5.1296e-102	ak5l	0	Intermediate_Epithelial_0dpa_vs_1dpa	DAR
chr20-23299036-23300227	2.77127e-107	1.04548	0.355	0.182	5.70138e-102	fryl	15014	Intermediate_Epithelial_0dpa_vs_1dpa	DAR
chr20-34364777-34365240	6.62335e-107	-2.16641	0.028	0.107	1.36263e-101	swt1	0	Intermediate_Epithelial_0dpa_vs_1dpa	DAR
chr18-13051522-13052342	8.70094e-107	-1.6912	0.052	0.145	1.79006e-101	srgap1a	0	Intermediate_Epithelial_0dpa_vs_1dpa	DAR
chr17-38772249-38773244	1.11426e-106	2.35127	0.121	0.023	2.29239e-101	dglucy	0	Intermediate_Epithelial_0dpa_vs_1dpa	DAR
chr6-43189587-43191374	1.22449e-106	-1.20171	0.109	0.221	2.51916e-101	si:dkey-178o16.4	27476	Intermediate_Epithelial_0dpa_vs_1dpa	DAR
chr14-30832570-30833932	1.78307e-106	-2.04969	0.03	0.114	3.66835e-101	ubl3b	20620	Intermediate_Epithelial_0dpa_vs_1dpa	DAR
chr14-22079084-22080115	1.81251e-106	1.96036	0.153	0.039	3.72891e-101	slc43a1a	0	Intermediate_Epithelial_0dpa_vs_1dpa	DAR
chr1-25173634-25174432	1.95675e-106	-1.15871	0.124	0.234	4.02567e-101	tmem154	0	Intermediate_Epithelial_0dpa_vs_1dpa	DAR
chr21-26987099-26988178	1.99072e-106	-1.72228	0.049	0.145	4.09554e-101	fkbp2	3019	Intermediate_Epithelial_0dpa_vs_1dpa	DAR
chr19-2592002-2593875	2.13317e-106	-1.13274	0.127	0.239	4.38861e-101	si:ch73-345f18.3	0	Intermediate_Epithelial_0dpa_vs_1dpa	DAR
chr3-27691676-27692790	2.8614e-106	2.05159	0.144	0.034	5.88681e-101	clcn7	0	Intermediate_Epithelial_0dpa_vs_1dpa	DAR
chr18-23199802-23201671	2.9507e-106	-1.45572	0.069	0.165	6.07052e-101	mef2aa	0	Intermediate_Epithelial_0dpa_vs_1dpa	DAR
chr6-30958723-30959520	4.01689e-106	-1.74047	0.048	0.138	8.26403e-101	pde4ba	4454	Intermediate_Epithelial_0dpa_vs_1dpa	DAR
chr7-30753089-30753987	5.10735e-106	-1.23765	0.108	0.219	1.05075e-100	mtmr10	0	Intermediate_Epithelial_0dpa_vs_1dpa	DAR
chr20-35806502-35807446	5.2382e-106	-1.28199	0.095	0.195	1.07767e-100	tnfrsf21	0	Intermediate_Epithelial_0dpa_vs_1dpa	DAR
chr23-3747085-3747876	5.83719e-106	-1.81529	0.042	0.133	1.2009e-100	smim29	2246	Intermediate_Epithelial_0dpa_vs_1dpa	DAR
chr16-38052116-38053718	6.41328e-106	-1.74428	0.048	0.137	1.31942e-100	plekho1b	0	Intermediate_Epithelial_0dpa_vs_1dpa	DAR
chr13-24243665-24245595	6.46479e-106	2.28499	0.123	0.025	1.33001e-100	urb2	0	Intermediate_Epithelial_0dpa_vs_1dpa	DAR
chr2-22661153-22663233	7.39654e-106	-2.20951	0.024	0.105	1.5217e-100	zgc:161973	0	Intermediate_Epithelial_0dpa_vs_1dpa	DAR
chr20-51417818-51418850	9.81063e-106	-1.97082	0.033	0.123	2.01836e-100	CU660013.1	8815	Intermediate_Epithelial_0dpa_vs_1dpa	DAR
chr13-2000510-2001295	1.21888e-105	-2.31273	0.023	0.1	2.50762e-100	gfral	0	Intermediate_Epithelial_0dpa_vs_1dpa	DAR
chr21-2415594-2416343	1.3677e-105	-1.54644	0.064	0.158	2.8138e-100	si:ch211-241b2.5	0	Intermediate_Epithelial_0dpa_vs_1dpa	DAR
chr3-24189372-24191089	1.44574e-105	2.72741	0.101	0.015	2.97435e-100	prr15la	0	Intermediate_Epithelial_0dpa_vs_1dpa	DAR
chr11-821695-822546	1.69909e-105	-1.58039	0.065	0.165	3.49558e-100	atg7	0	Intermediate_Epithelial_0dpa_vs_1dpa	DAR
chr6-51980093-51981265	1.807e-105	-1.69278	0.046	0.14	3.71758e-100	angpt4	0	Intermediate_Epithelial_0dpa_vs_1dpa	DAR
chr23-10339985-10341315	1.99261e-105	-1.98378	0.032	0.112	4.09944e-100	krt18a.1	6535	Intermediate_Epithelial_0dpa_vs_1dpa	DAR
chr22-3296982-3297556	2.55686e-105	2.07951	0.14	0.033	5.26028e-100	si:zfos-943e10.1	0	Intermediate_Epithelial_0dpa_vs_1dpa	DAR
chr23-14090938-14092230	2.59521e-105	1.22198	0.287	0.125	5.33917e-100	cacnb3a	5277	Intermediate_Epithelial_0dpa_vs_1dpa	DAR
chr1-55074969-55075776	2.60765e-105	1.12384	0.32	0.156	5.36477e-100	lgalsla	5020	Intermediate_Epithelial_0dpa_vs_1dpa	DAR
chr23-22470817-22472413	4.0708e-105	-1.48206	0.065	0.16	8.37494e-100	spsb1	23900	Intermediate_Epithelial_0dpa_vs_1dpa	DAR
chr18-9504294-9505383	4.36398e-105	-2.21203	0.025	0.102	8.9781e-100	sema3e	0	Intermediate_Epithelial_0dpa_vs_1dpa	DAR
chr3-18266243-18266992	6.91963e-105	-1.60724	0.058	0.154	1.42359e-99	BX649434.1	0	Intermediate_Epithelial_0dpa_vs_1dpa	DAR
chr21-17057685-17059265	7.64132e-105	1.41173	0.237	0.092	1.57206e-99	atp2a2b	0	Intermediate_Epithelial_0dpa_vs_1dpa	DAR
chr11-38403510-38404454	1.36358e-104	2.20263	0.129	0.027	2.80532e-99	CDK18	0	Intermediate_Epithelial_0dpa_vs_1dpa	DAR
chr2-34125351-34126632	1.41018e-104	-1.91774	0.036	0.122	2.9012e-99	klhl20	0	Intermediate_Epithelial_0dpa_vs_1dpa	DAR
chr3-33472444-33473509	1.432e-104	-2.01753	0.033	0.114	2.94608e-99	sgsm3	0	Intermediate_Epithelial_0dpa_vs_1dpa	DAR
chr23-22575498-22576480	1.46179e-104	-1.22583	0.105	0.209	3.00738e-99	CR388207.1	0	Intermediate_Epithelial_0dpa_vs_1dpa	DAR
chr5-24383038-24384204	1.49093e-104	2.06126	0.14	0.035	3.06733e-99	znf703	49353	Intermediate_Epithelial_0dpa_vs_1dpa	DAR
chr21-16008439-16009428	1.6096e-104	1.964	0.15	0.039	3.31146e-99	AL953866.1	41538	Intermediate_Epithelial_0dpa_vs_1dpa	DAR
chr6-40160727-40161465	1.95399e-104	1.96338	0.151	0.039	4.01999e-99	ip6k2b	0	Intermediate_Epithelial_0dpa_vs_1dpa	DAR
chr20-35042336-35043170	2.23643e-104	-1.44942	0.071	0.176	4.60105e-99	kif26bb	0	Intermediate_Epithelial_0dpa_vs_1dpa	DAR
chr1-23822271-23823280	2.23947e-104	-1.80177	0.045	0.137	4.60731e-99	slit2	0	Intermediate_Epithelial_0dpa_vs_1dpa	DAR
chr15-17771426-17772510	2.79514e-104	1.62268	0.194	0.064	5.75049e-99	si:ch211-213d14.2	14399	Intermediate_Epithelial_0dpa_vs_1dpa	DAR
chr11-18658690-18659695	2.80948e-104	-1.59867	0.058	0.156	5.78e-99	ncoa3	0	Intermediate_Epithelial_0dpa_vs_1dpa	DAR
chr8-2495700-2496686	3.84158e-104	-2.24576	0.024	0.1	7.90336e-99	rpl6	0	Intermediate_Epithelial_0dpa_vs_1dpa	DAR
chr7-6810757-6811539	6.27371e-104	-1.59049	0.058	0.151	1.2907e-98	sf3b2	10067	Intermediate_Epithelial_0dpa_vs_1dpa	DAR
chr1-5745145-5746464	8.38909e-104	-1.85612	0.041	0.13	1.7259e-98	nrp2a	0	Intermediate_Epithelial_0dpa_vs_1dpa	DAR
chr6-984608-985834	9.64115e-104	-1.86641	0.039	0.128	1.98349e-98	zeb2b	26701	Intermediate_Epithelial_0dpa_vs_1dpa	DAR
chr7-71554896-71556601	1.36217e-103	2.21982	0.128	0.027	2.80243e-98	adcyap1a	0	Intermediate_Epithelial_0dpa_vs_1dpa	DAR
chr17-16217852-16218444	1.5054e-103	-1.82771	0.039	0.128	3.0971e-98	kif13ba	0	Intermediate_Epithelial_0dpa_vs_1dpa	DAR
chr8-26673793-26674545	1.84131e-103	-2.25298	0.025	0.101	3.78816e-98	tmem51a	26492	Intermediate_Epithelial_0dpa_vs_1dpa	DAR
chr16-4252702-4253669	2.39073e-103	1.49806	0.218	0.077	4.91849e-98	CU469524.2	10716	Intermediate_Epithelial_0dpa_vs_1dpa	DAR
chr12-37363631-37364698	2.54437e-103	-1.38947	0.079	0.176	5.23458e-98	tekt3	19772	Intermediate_Epithelial_0dpa_vs_1dpa	DAR
chr20-26736903-26737925	2.67187e-103	2.22305	0.128	0.027	5.49688e-98	gmds	0	Intermediate_Epithelial_0dpa_vs_1dpa	DAR
chr22-9477822-9478862	2.8643e-103	-1.53335	0.062	0.154	5.89278e-98	cacna2d2b	0	Intermediate_Epithelial_0dpa_vs_1dpa	DAR
chr19-15975530-15976311	3.09834e-103	-1.80995	0.042	0.13	6.37427e-98	ctps1a	39569	Intermediate_Epithelial_0dpa_vs_1dpa	DAR
chr18-32821188-32822673	3.37774e-103	1.92608	0.151	0.042	6.94909e-98	olfcg6	16382	Intermediate_Epithelial_0dpa_vs_1dpa	DAR
chr20-22795483-22796397	3.64347e-103	-1.9728	0.032	0.115	7.49579e-98	fip1l1a	0	Intermediate_Epithelial_0dpa_vs_1dpa	DAR
chr23-40908393-40909441	4.33617e-103	-1.46339	0.068	0.162	8.9209e-98	LO017845.1	0	Intermediate_Epithelial_0dpa_vs_1dpa	DAR
chr16-35714190-35714969	4.84071e-103	-1.41883	0.072	0.171	9.95888e-98	map7d1a	0	Intermediate_Epithelial_0dpa_vs_1dpa	DAR
chr23-31930587-31932335	5.28716e-103	-1.40625	0.071	0.17	1.08774e-97	si:dkey-126g1.7	0	Intermediate_Epithelial_0dpa_vs_1dpa	DAR
chr16-12609447-12611544	5.52447e-103	-1.49621	0.065	0.156	1.13656e-97	il11a	0	Intermediate_Epithelial_0dpa_vs_1dpa	DAR
chr18-197395-198834	5.85418e-103	1.28837	0.262	0.111	1.20439e-97	larp6a	2550	Intermediate_Epithelial_0dpa_vs_1dpa	DAR
chr24-2402825-2403296	6.17444e-103	-2.06509	0.029	0.108	1.27028e-97	rreb1a	0	Intermediate_Epithelial_0dpa_vs_1dpa	DAR
chr22-35071349-35072114	9.64523e-103	2.50226	0.111	0.019	1.98433e-97	si:ch73-173h19.3	0	Intermediate_Epithelial_0dpa_vs_1dpa	DAR
chr3-23741887-23743645	1.10895e-102	2.33321	0.12	0.023	2.28146e-97	CR751227.2	0	Intermediate_Epithelial_0dpa_vs_1dpa	DAR
chr24-1556014-1557044	1.19082e-102	1.59192	0.195	0.067	2.4499e-97	pard3aa	70412	Intermediate_Epithelial_0dpa_vs_1dpa	DAR
chr13-17037687-17039105	1.22769e-102	2.47716	0.109	0.02	2.52576e-97	lrmda	0	Intermediate_Epithelial_0dpa_vs_1dpa	DAR
chr20-36955634-36956739	1.27704e-102	1.76355	0.172	0.049	2.62728e-97	CR388421.1	0	Intermediate_Epithelial_0dpa_vs_1dpa	DAR
chr5-64911984-64913014	1.97373e-102	1.80418	0.165	0.047	4.0606e-97	ptgs1	0	Intermediate_Epithelial_0dpa_vs_1dpa	DAR
chr22-10795565-10796646	2.1015e-102	1.73739	0.174	0.053	4.32346e-97	enc3	0	Intermediate_Epithelial_0dpa_vs_1dpa	DAR
chr23-30962653-30963796	2.10818e-102	-1.48786	0.065	0.157	4.33719e-97	osbpl2a	2146	Intermediate_Epithelial_0dpa_vs_1dpa	DAR
chr2-8791767-8792798	2.1995e-102	-1.77537	0.042	0.128	4.52507e-97	zzz3	0	Intermediate_Epithelial_0dpa_vs_1dpa	DAR
chr3-47433659-47434395	2.26055e-102	-1.26282	0.095	0.198	4.65068e-97	AL928740.1	26092	Intermediate_Epithelial_0dpa_vs_1dpa	DAR
chr3-46296891-46297983	3.02891e-102	2.45256	0.112	0.02	6.23144e-97	mrtfbb	0	Intermediate_Epithelial_0dpa_vs_1dpa	DAR
chr9-23129189-23130155	5.4261e-102	-2.14223	0.028	0.105	1.11632e-96	BX936418.1	0	Intermediate_Epithelial_0dpa_vs_1dpa	DAR
chr1-12529451-12530503	6.92616e-102	1.60922	0.189	0.062	1.42493e-96	BX511261.1	12855	Intermediate_Epithelial_0dpa_vs_1dpa	DAR
chr24-29921463-29923033	7.93131e-102	-1.08178	0.139	0.252	1.63172e-96	frrs1b	0	Intermediate_Epithelial_0dpa_vs_1dpa	DAR
chr13-46227131-46227931	8.36037e-102	2.14387	0.133	0.029	1.72e-96	CABZ01022272.1	0	Intermediate_Epithelial_0dpa_vs_1dpa	DAR
chr17-25355630-25356758	8.47123e-102	-1.9829	0.03	0.109	1.7428e-96	lck	0	Intermediate_Epithelial_0dpa_vs_1dpa	DAR
chr4-9147315-9148669	9.15525e-102	-1.68894	0.049	0.136	1.88353e-96	chst11	0	Intermediate_Epithelial_0dpa_vs_1dpa	DAR
chr22-23374561-23375583	9.46965e-102	1.16078	0.298	0.139	1.94821e-96	dennd1b	0	Intermediate_Epithelial_0dpa_vs_1dpa	DAR
chr13-33985945-33987340	1.16456e-101	-1.88491	0.036	0.122	2.39588e-96	macrod2	0	Intermediate_Epithelial_0dpa_vs_1dpa	DAR
chr10-176280-178294	1.55304e-101	1.29777	0.261	0.106	3.19509e-96	erg	8497	Intermediate_Epithelial_0dpa_vs_1dpa	DAR
chr23-22273846-22274541	1.60901e-101	-2.14098	0.027	0.105	3.31025e-96	rap1gap	0	Intermediate_Epithelial_0dpa_vs_1dpa	DAR
chr7-15852888-15853957	2.21368e-101	-2.11872	0.026	0.103	4.55425e-96	pax6b	17198	Intermediate_Epithelial_0dpa_vs_1dpa	DAR
chr20-28347868-28348488	2.31117e-101	-1.60219	0.054	0.145	4.75481e-96	ino80	0	Intermediate_Epithelial_0dpa_vs_1dpa	DAR
chr25-31308117-31309015	2.78809e-101	-2.11358	0.026	0.107	5.73599e-96	CU462909.1	8996	Intermediate_Epithelial_0dpa_vs_1dpa	DAR
chr18-15512255-15513077	2.99323e-101	-1.68826	0.051	0.137	6.15803e-96	ppfibp1b	0	Intermediate_Epithelial_0dpa_vs_1dpa	DAR
chr16-45958510-45959507	3.0894e-101	-1.1624	0.113	0.222	6.35588e-96	otud7b	0	Intermediate_Epithelial_0dpa_vs_1dpa	DAR
chr2-24931462-24933202	3.78472e-101	-1.88789	0.036	0.116	7.78638e-96	agtr1a	0	Intermediate_Epithelial_0dpa_vs_1dpa	DAR
chr5-35523948-35525181	4.14746e-101	2.53059	0.108	0.018	8.53266e-96	si:dkey-204l11.1	1575	Intermediate_Epithelial_0dpa_vs_1dpa	DAR
chr23-1814923-1815867	4.50943e-101	1.85684	0.157	0.044	9.27734e-96	tgm1	66781	Intermediate_Epithelial_0dpa_vs_1dpa	DAR
chr5-41464124-41465009	4.75648e-101	1.95701	0.146	0.038	9.7856e-96	pias2	11433	Intermediate_Epithelial_0dpa_vs_1dpa	DAR
chr3-62487480-62488378	4.90504e-101	-1.79346	0.041	0.127	1.00912e-95	sox9b	32662	Intermediate_Epithelial_0dpa_vs_1dpa	DAR
chr12-27223729-27224831	6.36682e-101	-2.0845	0.028	0.106	1.30986e-95	nbr1a	0	Intermediate_Epithelial_0dpa_vs_1dpa	DAR
chr23-37750240-37751059	1.2084e-100	-1.72085	0.043	0.134	2.48606e-95	CR381544.1	0	Intermediate_Epithelial_0dpa_vs_1dpa	DAR
chr7-28656997-28658525	1.27394e-100	0.759336	0.495	0.308	2.6209e-95	adgrg1	0	Intermediate_Epithelial_0dpa_vs_1dpa	DAR
chr20-21542395-21543515	1.40068e-100	2.61292	0.102	0.017	2.88165e-95	BX276098.1	0	Intermediate_Epithelial_0dpa_vs_1dpa	DAR
chr8-17408945-17409854	1.40747e-100	-2.02291	0.03	0.108	2.89562e-95	skia	0	Intermediate_Epithelial_0dpa_vs_1dpa	DAR
chr2-31024591-31025444	1.83432e-100	-1.35318	0.08	0.179	3.77378e-95	emilin2a	6494	Intermediate_Epithelial_0dpa_vs_1dpa	DAR
chr10-26873178-26874169	2.16015e-100	-1.74292	0.042	0.127	4.44413e-95	ehbp1l1b	0	Intermediate_Epithelial_0dpa_vs_1dpa	DAR
chr18-22197271-22198234	2.5116e-100	-1.26385	0.092	0.204	5.16717e-95	ripor1	0	Intermediate_Epithelial_0dpa_vs_1dpa	DAR
chr14-45357198-45357958	2.56149e-100	-1.02317	0.157	0.268	5.2698e-95	ttc9c	0	Intermediate_Epithelial_0dpa_vs_1dpa	DAR
chr6-38729831-38731538	2.77139e-100	0.968435	0.375	0.199	5.70163e-95	atp10a	0	Intermediate_Epithelial_0dpa_vs_1dpa	DAR
chr2-56077206-56077839	2.85311e-100	-1.91866	0.035	0.122	5.86975e-95	si:ch211-178n15.1	0	Intermediate_Epithelial_0dpa_vs_1dpa	DAR
chr11-2344359-2345504	2.87984e-100	-2.04329	0.029	0.105	5.92475e-95	igfbp6a	45964	Intermediate_Epithelial_0dpa_vs_1dpa	DAR
chr20-37868502-37869456	3.21726e-100	-1.70529	0.045	0.135	6.61894e-95	vash2	0	Intermediate_Epithelial_0dpa_vs_1dpa	DAR
chr22-22848921-22850846	4.36766e-100	-2.15962	0.025	0.101	8.98568e-95	CABZ01039424.1	8245	Intermediate_Epithelial_0dpa_vs_1dpa	DAR
chr4-8249966-8250892	4.55148e-100	2.44045	0.111	0.02	9.36386e-95	ERC1	0	Intermediate_Epithelial_0dpa_vs_1dpa	DAR
chr20-51288136-51289115	4.82605e-100	-1.59686	0.055	0.144	9.92872e-95	nfkbie	0	Intermediate_Epithelial_0dpa_vs_1dpa	DAR
chr7-27495422-27496584	5.35164e-100	-1.23487	0.093	0.203	1.101e-94	cyp2r1	0	Intermediate_Epithelial_0dpa_vs_1dpa	DAR
chr1-6283459-6284989	5.45291e-100	-1.56139	0.058	0.152	1.12184e-94	gtf3c3	11312	Intermediate_Epithelial_0dpa_vs_1dpa	DAR
chr9-5935782-5936835	7.5458e-100	-2.09278	0.027	0.101	1.55241e-94	GPR89B	19026	Intermediate_Epithelial_0dpa_vs_1dpa	DAR
chr18-40248048-40249488	7.80541e-100	-1.34815	0.079	0.18	1.60582e-94	sema6dl	105509	Intermediate_Epithelial_0dpa_vs_1dpa	DAR
chr16-29503841-29504527	8.67189e-100	-1.76594	0.041	0.127	1.78409e-94	ctsk	1053	Intermediate_Epithelial_0dpa_vs_1dpa	DAR
chr7-73237972-73239868	1.4998e-99	1.66707	0.178	0.057	3.08558e-94	dre-mir-31	23882	Intermediate_Epithelial_0dpa_vs_1dpa	DAR
chr1-26411309-26413538	1.74752e-99	1.76252	0.166	0.049	3.59521e-94	arhgef38	0	Intermediate_Epithelial_0dpa_vs_1dpa	DAR
chr2-43241488-43242148	1.80473e-99	-1.13424	0.121	0.226	3.7129e-94	pard3ab	0	Intermediate_Epithelial_0dpa_vs_1dpa	DAR
chr12-46600882-46601899	1.92436e-99	1.33257	0.243	0.097	3.95902e-94	CABZ01111725.1	1541	Intermediate_Epithelial_0dpa_vs_1dpa	DAR
chr18-47433741-47434686	2.07752e-99	1.96794	0.143	0.037	4.27412e-94	CABZ01112464.1	69090	Intermediate_Epithelial_0dpa_vs_1dpa	DAR
chr9-21352865-21353967	2.16329e-99	-1.90123	0.035	0.114	4.45058e-94	xpo4	0	Intermediate_Epithelial_0dpa_vs_1dpa	DAR
chr7-50513478-50514479	2.27084e-99	-2.11822	0.028	0.104	4.67185e-94	adamtsl5	0	Intermediate_Epithelial_0dpa_vs_1dpa	DAR
chr13-1466178-1466881	2.35603e-99	-1.66109	0.049	0.136	4.84712e-94	si:ch211-165e15.1	0	Intermediate_Epithelial_0dpa_vs_1dpa	DAR
chr22-665558-666612	3.11629e-99	2.07516	0.134	0.031	6.4112e-94	elf3	186	Intermediate_Epithelial_0dpa_vs_1dpa	DAR
chr18-22569227-22570126	3.61621e-99	-1.88259	0.038	0.118	7.4397e-94	bcar1	0	Intermediate_Epithelial_0dpa_vs_1dpa	DAR
chr16-35548875-35550214	3.67658e-99	1.31496	0.248	0.103	7.56391e-94	scmh1	4814	Intermediate_Epithelial_0dpa_vs_1dpa	DAR
chr14-1122046-1122966	3.6813e-99	1.40591	0.227	0.087	7.57361e-94	si:ch1073-303k11.2	565	Intermediate_Epithelial_0dpa_vs_1dpa	DAR
chr20-34997448-34998369	4.09489e-99	2.07881	0.133	0.031	8.42449e-94	cnstb	0	Intermediate_Epithelial_0dpa_vs_1dpa	DAR
chr3-11689157-11690523	4.13188e-99	1.7981	0.161	0.047	8.50061e-94	hlfa	64462	Intermediate_Epithelial_0dpa_vs_1dpa	DAR
chr4-13904774-13905572	5.62117e-99	-1.69473	0.045	0.135	1.15645e-93	pphln1	0	Intermediate_Epithelial_0dpa_vs_1dpa	DAR
chr3-56523518-56524505	9.18485e-99	-1.14865	0.115	0.219	1.88962e-93	cyth1a	0	Intermediate_Epithelial_0dpa_vs_1dpa	DAR
chr5-19110212-19110984	1.10502e-98	-1.70345	0.047	0.133	2.27339e-93	unc13ba	0	Intermediate_Epithelial_0dpa_vs_1dpa	DAR
chr20-8889127-8890492	1.15019e-98	-1.68207	0.046	0.134	2.3663e-93	CR388209.3	43915	Intermediate_Epithelial_0dpa_vs_1dpa	DAR
chr6-23869260-23869993	1.18011e-98	2.11698	0.128	0.03	2.42787e-93	znf648	17320	Intermediate_Epithelial_0dpa_vs_1dpa	DAR
chr14-26284776-26285214	1.27888e-98	1.96635	0.142	0.037	2.63107e-93	FO082779.2	0	Intermediate_Epithelial_0dpa_vs_1dpa	DAR
chr2-35485488-35486271	1.45989e-98	-2.12237	0.029	0.108	3.00345e-93	CR855337.1	0	Intermediate_Epithelial_0dpa_vs_1dpa	DAR
chr11-25498889-25499784	1.6646e-98	1.94547	0.148	0.038	3.42461e-93	gnl3l	0	Intermediate_Epithelial_0dpa_vs_1dpa	DAR
chr13-24043019-24044087	1.69016e-98	-1.24901	0.092	0.194	3.47721e-93	pgbd5	0	Intermediate_Epithelial_0dpa_vs_1dpa	DAR
chr3-62165405-62166596	1.85374e-98	1.77491	0.163	0.046	3.81373e-93	noxo1a	0	Intermediate_Epithelial_0dpa_vs_1dpa	DAR
chr17-32400801-32401829	2.47956e-98	1.14324	0.295	0.136	5.10124e-93	grhl1	0	Intermediate_Epithelial_0dpa_vs_1dpa	DAR
chr4-15346616-15347800	2.65189e-98	-1.70786	0.045	0.127	5.45579e-93	plxna4	0	Intermediate_Epithelial_0dpa_vs_1dpa	DAR
chr15-3289823-3290470	3.04991e-98	1.17025	0.288	0.129	6.27464e-93	foxo1a	0	Intermediate_Epithelial_0dpa_vs_1dpa	DAR
chr12-47721178-47722150	4.1619e-98	-1.67757	0.048	0.138	8.56236e-93	lzts2b	0	Intermediate_Epithelial_0dpa_vs_1dpa	DAR
chr25-21911771-21912798	4.43216e-98	1.29016	0.252	0.105	9.11837e-93	dynlrb2	3126	Intermediate_Epithelial_0dpa_vs_1dpa	DAR
chr10-2549795-2550700	4.71209e-98	1.76915	0.165	0.048	9.69427e-93	zmp:0000001301	0	Intermediate_Epithelial_0dpa_vs_1dpa	DAR
chr4-4729056-4730227	6.70482e-98	1.53127	0.203	0.07	1.3794e-92	creb3l2	0	Intermediate_Epithelial_0dpa_vs_1dpa	DAR
chr2-42526346-42527390	6.78222e-98	1.74055	0.166	0.049	1.39532e-92	dip2cb	0	Intermediate_Epithelial_0dpa_vs_1dpa	DAR
chr15-28288689-28289425	7.36845e-98	-1.29542	0.092	0.184	1.51593e-92	myo1cb	0	Intermediate_Epithelial_0dpa_vs_1dpa	DAR
chr17-37717464-37719141	7.73289e-98	-1.512	0.06	0.149	1.5909e-92	tmem229b	67635	Intermediate_Epithelial_0dpa_vs_1dpa	DAR
chr17-20649673-20651635	8.1462e-98	-1.74164	0.043	0.125	1.67593e-92	slc16a9a	2137	Intermediate_Epithelial_0dpa_vs_1dpa	DAR
chr11-30511967-30512990	8.37074e-98	1.92513	0.147	0.038	1.72213e-92	tmem178	665	Intermediate_Epithelial_0dpa_vs_1dpa	DAR
chr16-32977792-32978717	9.59476e-98	-1.63438	0.048	0.14	1.97395e-92	me1	0	Intermediate_Epithelial_0dpa_vs_1dpa	DAR
chr2-3426686-3428928	1.13613e-97	-1.3477	0.078	0.174	2.33738e-92	ACKR2	0	Intermediate_Epithelial_0dpa_vs_1dpa	DAR
chr25-14640451-14641409	1.35302e-97	1.91982	0.145	0.039	2.7836e-92	nav2b	2790	Intermediate_Epithelial_0dpa_vs_1dpa	DAR
chr24-3107071-3107850	1.37226e-97	-2.03524	0.029	0.107	2.82317e-92	inhbaa	44460	Intermediate_Epithelial_0dpa_vs_1dpa	DAR
chr19-28296395-28297839	1.38111e-97	1.04482	0.325	0.163	2.84138e-92	lpcat1	0	Intermediate_Epithelial_0dpa_vs_1dpa	DAR
chr15-20586907-20587673	1.75297e-97	-1.72981	0.045	0.129	3.60643e-92	sgsm2	0	Intermediate_Epithelial_0dpa_vs_1dpa	DAR
chr9-34948035-34948256	1.92608e-97	2.49778	0.105	0.018	3.96256e-92	dcun1d2a	2452	Intermediate_Epithelial_0dpa_vs_1dpa	DAR
chr21-26449596-26450891	1.93735e-97	-1.98109	0.03	0.105	3.98575e-92	ankhd1	0	Intermediate_Epithelial_0dpa_vs_1dpa	DAR
chr13-1484258-1485493	2.41888e-97	1.30418	0.247	0.104	4.9764e-92	si:ch211-165e15.1	0	Intermediate_Epithelial_0dpa_vs_1dpa	DAR
chr2-5169902-5170835	2.45053e-97	1.87511	0.151	0.04	5.04152e-92	phb2a	7336	Intermediate_Epithelial_0dpa_vs_1dpa	DAR
chr13-24203820-24204505	2.45194e-97	2.02888	0.135	0.033	5.04442e-92	galnt2	0	Intermediate_Epithelial_0dpa_vs_1dpa	DAR
chr20-34110628-34111888	2.69915e-97	-1.88339	0.035	0.115	5.55302e-92	ptgs2b	9929	Intermediate_Epithelial_0dpa_vs_1dpa	DAR
chr16-28990113-28990790	2.96759e-97	-1.93031	0.035	0.112	6.10529e-92	npr1b	0	Intermediate_Epithelial_0dpa_vs_1dpa	DAR
chr8-36919523-36921452	3.1474e-97	1.00406	0.349	0.18	6.4752e-92	iqsec2b	0	Intermediate_Epithelial_0dpa_vs_1dpa	DAR
chr13-25176948-25177990	3.32594e-97	1.34205	0.239	0.097	6.84252e-92	adka	0	Intermediate_Epithelial_0dpa_vs_1dpa	DAR
chr15-28384939-28385795	4.40535e-97	-1.53715	0.056	0.141	9.06321e-92	slc43a2a	0	Intermediate_Epithelial_0dpa_vs_1dpa	DAR
chr18-15531381-15532500	4.43496e-97	-1.72647	0.043	0.123	9.12413e-92	ppfibp1b	0	Intermediate_Epithelial_0dpa_vs_1dpa	DAR
chr2-37369851-37371210	5.08169e-97	-1.41106	0.072	0.159	1.04547e-91	prkci	0	Intermediate_Epithelial_0dpa_vs_1dpa	DAR
chr13-24809272-24810655	5.29116e-97	-1.24488	0.095	0.2	1.08856e-91	slka	0	Intermediate_Epithelial_0dpa_vs_1dpa	DAR
chr3-33443045-33443966	7.71637e-97	-1.74191	0.041	0.124	1.5875e-91	gtpbp1	0	Intermediate_Epithelial_0dpa_vs_1dpa	DAR
chr6-8732716-8733328	9.34811e-97	1.8735	0.153	0.041	1.9232e-91	cavin2b	0	Intermediate_Epithelial_0dpa_vs_1dpa	DAR
chr1-32374785-32375734	9.56309e-97	-1.77167	0.041	0.123	1.96743e-91	pudp	0	Intermediate_Epithelial_0dpa_vs_1dpa	DAR
chr17-19742195-19743433	1.05859e-96	-1.58648	0.054	0.147	2.17787e-91	grem2a	0	Intermediate_Epithelial_0dpa_vs_1dpa	DAR
chr22-29796843-29797833	1.09614e-96	-1.61341	0.053	0.145	2.25512e-91	BX649294.1	0	Intermediate_Epithelial_0dpa_vs_1dpa	DAR
chr14-49549704-49550914	1.30379e-96	-2.06829	0.028	0.102	2.68231e-91	CABZ01063971.1	0	Intermediate_Epithelial_0dpa_vs_1dpa	DAR
chr14-9359297-9360385	1.38869e-96	-1.59751	0.054	0.143	2.85699e-91	tent5d	4119	Intermediate_Epithelial_0dpa_vs_1dpa	DAR
chr21-14369123-14370192	1.61901e-96	1.35944	0.231	0.091	3.33082e-91	cacna1bb	11034	Intermediate_Epithelial_0dpa_vs_1dpa	DAR
chr10-403818-406475	1.63481e-96	-0.982953	0.153	0.253	3.36333e-91	dact3a	0	Intermediate_Epithelial_0dpa_vs_1dpa	DAR
chr15-36470723-36472233	1.75745e-96	1.44976	0.213	0.078	3.61564e-91	si:dkey-262k9.2	0	Intermediate_Epithelial_0dpa_vs_1dpa	DAR
chr17-33088903-33089892	1.84855e-96	2.33957	0.112	0.021	3.80305e-91	snx9a	68401	Intermediate_Epithelial_0dpa_vs_1dpa	DAR
chr7-68409281-68410488	1.90607e-96	-1.30437	0.082	0.175	3.9214e-91	CU468723.4	0	Intermediate_Epithelial_0dpa_vs_1dpa	DAR
chr8-50153534-50154307	1.95359e-96	1.81784	0.157	0.045	4.01915e-91	entpd4	0	Intermediate_Epithelial_0dpa_vs_1dpa	DAR
chr18-24497975-24498974	1.99255e-96	-1.72616	0.043	0.128	4.09931e-91	CR847971.1	14689	Intermediate_Epithelial_0dpa_vs_1dpa	DAR
chr13-27107403-27108398	2.07208e-96	-1.23955	0.088	0.191	4.26294e-91	slc24a3	0	Intermediate_Epithelial_0dpa_vs_1dpa	DAR
chr1-53007278-53008628	2.32293e-96	-1.06273	0.131	0.234	4.779e-91	inpp4b	0	Intermediate_Epithelial_0dpa_vs_1dpa	DAR
chr7-28473224-28474355	2.36817e-96	2.39555	0.109	0.02	4.87209e-91	dennd2b	0	Intermediate_Epithelial_0dpa_vs_1dpa	DAR
chr3-32605507-32606331	2.38084e-96	2.02564	0.133	0.032	4.89814e-91	CU459155.1	0	Intermediate_Epithelial_0dpa_vs_1dpa	DAR
chr2-41189024-41190067	3.18549e-96	1.30419	0.243	0.099	6.55356e-91	CU302321.2	0	Intermediate_Epithelial_0dpa_vs_1dpa	DAR
chr8-32758436-32759226	3.71262e-96	-1.9325	0.033	0.108	7.63805e-91	hmcn2	0	Intermediate_Epithelial_0dpa_vs_1dpa	DAR
chr20-35579029-35580003	4.27404e-96	-2.12388	0.025	0.1	8.79308e-91	si:dkey-30j22.1	0	Intermediate_Epithelial_0dpa_vs_1dpa	DAR
chr14-30751029-30751544	4.63678e-96	1.02001	0.338	0.17	9.53934e-91	yif1a	2121	Intermediate_Epithelial_0dpa_vs_1dpa	DAR
chr8-23169836-23170592	4.92795e-96	-1.88317	0.035	0.116	1.01384e-90	dnajc5aa	0	Intermediate_Epithelial_0dpa_vs_1dpa	DAR
chr21-25421606-25422393	5.17554e-96	2.24775	0.117	0.024	1.06477e-90	cnksr2b	0	Intermediate_Epithelial_0dpa_vs_1dpa	DAR
chr22-35170166-35170723	5.76025e-96	-2.00439	0.03	0.107	1.18507e-90	rnf13	0	Intermediate_Epithelial_0dpa_vs_1dpa	DAR
chr16-20635492-20636142	1.03065e-95	1.85474	0.15	0.042	2.12037e-90	creb5b	0	Intermediate_Epithelial_0dpa_vs_1dpa	DAR
chr18-47399681-47400446	1.03493e-95	1.36318	0.229	0.093	2.12919e-90	barx2	53353	Intermediate_Epithelial_0dpa_vs_1dpa	DAR
chr4-18923155-18923985	1.15718e-95	1.25068	0.259	0.106	2.3807e-90	rap1b	0	Intermediate_Epithelial_0dpa_vs_1dpa	DAR
chr9-33129185-33131157	1.1768e-95	1.24524	0.259	0.112	2.42105e-90	slc5a3b	3724	Intermediate_Epithelial_0dpa_vs_1dpa	DAR
chr2-16348066-16348914	1.35337e-95	1.30995	0.242	0.097	2.78432e-90	arhgef4	0	Intermediate_Epithelial_0dpa_vs_1dpa	DAR
chr1-31345086-31345814	1.36019e-95	2.02521	0.135	0.033	2.79835e-90	kcnq5b	0	Intermediate_Epithelial_0dpa_vs_1dpa	DAR
chr8-39558603-39560279	1.52637e-95	1.92484	0.144	0.038	3.14023e-90	lzts1	0	Intermediate_Epithelial_0dpa_vs_1dpa	DAR
chr12-45487718-45488670	1.61541e-95	1.39088	0.22	0.083	3.32342e-90	CABZ01068358.1	4383	Intermediate_Epithelial_0dpa_vs_1dpa	DAR
chr24-8579861-8581096	1.84568e-95	1.60861	0.186	0.06	3.79716e-90	tfap2a	140579	Intermediate_Epithelial_0dpa_vs_1dpa	DAR
chr2-18648313-18648973	1.86439e-95	2.48754	0.101	0.018	3.83565e-90	pbx1a	49414	Intermediate_Epithelial_0dpa_vs_1dpa	DAR
chr8-54162947-54163555	1.86736e-95	-1.74459	0.041	0.122	3.84175e-90	brpf1	7850	Intermediate_Epithelial_0dpa_vs_1dpa	DAR
chr12-5533158-5534183	2.0478e-95	-2.01722	0.028	0.102	4.21298e-90	ace	0	Intermediate_Epithelial_0dpa_vs_1dpa	DAR
chr9-13887338-13888236	2.15011e-95	-1.6731	0.044	0.124	4.42347e-90	RAPH1	0	Intermediate_Epithelial_0dpa_vs_1dpa	DAR
chr15-23952452-23953528	3.03025e-95	1.86683	0.149	0.041	6.2342e-90	myo18ab	0	Intermediate_Epithelial_0dpa_vs_1dpa	DAR
chr6-44023292-44025388	3.41046e-95	-1.28937	0.085	0.181	7.0164e-90	rybpb	0	Intermediate_Epithelial_0dpa_vs_1dpa	DAR
chr8-40422642-40423598	3.62722e-95	-1.48534	0.061	0.149	7.46236e-90	tbc1d10aa	3167	Intermediate_Epithelial_0dpa_vs_1dpa	DAR
chr3-39139533-39140227	3.72069e-95	-1.8798	0.034	0.114	7.65466e-90	svilc	0	Intermediate_Epithelial_0dpa_vs_1dpa	DAR
chr15-8611777-8612510	4.03824e-95	-1.99635	0.031	0.111	8.30796e-90	arhgap35a	0	Intermediate_Epithelial_0dpa_vs_1dpa	DAR
chr12-30562184-30562922	4.38552e-95	1.76066	0.164	0.047	9.02242e-90	si:ch211-28p3.4	627	Intermediate_Epithelial_0dpa_vs_1dpa	DAR
chr16-52917953-52918799	4.82931e-95	-1.14448	0.112	0.211	9.93544e-90	zdhhc11	1704	Intermediate_Epithelial_0dpa_vs_1dpa	DAR
chr11-18280440-18281079	9.22176e-95	-1.38646	0.071	0.167	1.89721e-89	stimate	0	Intermediate_Epithelial_0dpa_vs_1dpa	DAR
chr12-1474090-1475086	1.12445e-94	-1.23362	0.097	0.195	2.31336e-89	usp22	0	Intermediate_Epithelial_0dpa_vs_1dpa	DAR
chr3-48803922-48804549	1.39923e-94	-1.8813	0.032	0.111	2.87867e-89	hs3st3b1a	38368	Intermediate_Epithelial_0dpa_vs_1dpa	DAR
chr15-31777567-31778654	2.31178e-94	1.71054	0.167	0.05	4.75606e-89	rxfp2b	4909	Intermediate_Epithelial_0dpa_vs_1dpa	DAR
chr2-27547682-27548735	2.47752e-94	1.89878	0.144	0.039	5.09706e-89	zswim5	3739	Intermediate_Epithelial_0dpa_vs_1dpa	DAR
chr18-1681540-1682571	2.77757e-94	-1.75204	0.044	0.13	5.71435e-89	slitrk3a	21412	Intermediate_Epithelial_0dpa_vs_1dpa	DAR
chr20-15454657-15455794	4.09745e-94	1.78839	0.156	0.046	8.42977e-89	jun	96862	Intermediate_Epithelial_0dpa_vs_1dpa	DAR
chr11-18589203-18590597	4.72708e-94	2.10959	0.124	0.029	9.72512e-89	zmynd8	0	Intermediate_Epithelial_0dpa_vs_1dpa	DAR
chr25-32874546-32875476	4.75411e-94	1.72586	0.166	0.049	9.78072e-89	tmem266	4751	Intermediate_Epithelial_0dpa_vs_1dpa	DAR
chr13-18642994-18644310	4.87295e-94	1.63346	0.177	0.057	1.00252e-88	CR932438.1	579	Intermediate_Epithelial_0dpa_vs_1dpa	DAR
chr2-34039915-34040479	5.54085e-94	-1.75518	0.04	0.122	1.13993e-88	eif2b3	0	Intermediate_Epithelial_0dpa_vs_1dpa	DAR
chr13-33330776-33332254	6.26428e-94	1.47886	0.201	0.073	1.28876e-88	si:dkey-71p21.13	9234	Intermediate_Epithelial_0dpa_vs_1dpa	DAR
chr17-41783407-41784342	6.89052e-94	2.09956	0.125	0.028	1.4176e-88	ralgapa2	0	Intermediate_Epithelial_0dpa_vs_1dpa	DAR
chr16-35926435-35928039	8.07233e-94	-1.97313	0.03	0.104	1.66074e-88	sh3d21	0	Intermediate_Epithelial_0dpa_vs_1dpa	DAR
chr3-3655678-3656795	8.29493e-94	-1.98972	0.03	0.102	1.70653e-88	plbd1	0	Intermediate_Epithelial_0dpa_vs_1dpa	DAR
chr23-10891570-10892527	8.55783e-94	-1.89298	0.032	0.107	1.76062e-88	pdzrn3a	0	Intermediate_Epithelial_0dpa_vs_1dpa	DAR
chr24-4391373-4391975	8.89951e-94	-1.79924	0.039	0.117	1.83091e-88	ccny	0	Intermediate_Epithelial_0dpa_vs_1dpa	DAR
chr4-9957023-9958915	1.3509e-93	1.42564	0.213	0.08	2.77924e-88	sbf1	0	Intermediate_Epithelial_0dpa_vs_1dpa	DAR
chr23-4391045-4392196	1.36577e-93	1.60656	0.178	0.06	2.80982e-88	zgc:171857	0	Intermediate_Epithelial_0dpa_vs_1dpa	DAR
chr2-25142894-25143752	1.76837e-93	1.48105	0.198	0.072	3.63811e-88	nceh1a	0	Intermediate_Epithelial_0dpa_vs_1dpa	DAR
chr14-27926275-27927629	1.82422e-93	1.03751	0.327	0.164	3.753e-88	tsc22d3	71126	Intermediate_Epithelial_0dpa_vs_1dpa	DAR
chr21-30843863-30845102	1.83785e-93	1.92619	0.14	0.035	3.78105e-88	stim1b	0	Intermediate_Epithelial_0dpa_vs_1dpa	DAR
chr5-17471923-17473232	3.1293e-93	1.71775	0.163	0.05	6.43797e-88	si:ch211-130h14.6	126637	Intermediate_Epithelial_0dpa_vs_1dpa	DAR
chr1-29721528-29722547	5.98233e-93	-1.39819	0.067	0.158	1.23076e-87	raph1b	0	Intermediate_Epithelial_0dpa_vs_1dpa	DAR
chr20-2381836-2382739	6.88763e-93	2.36706	0.107	0.02	1.41701e-87	EPB41L2	20609	Intermediate_Epithelial_0dpa_vs_1dpa	DAR
chr12-24443853-24445085	7.47688e-93	-2.05949	0.028	0.102	1.53823e-87	nrxn1a	0	Intermediate_Epithelial_0dpa_vs_1dpa	DAR
chr10-10416094-10417464	7.50256e-93	-1.00556	0.134	0.243	1.54352e-87	sardh	0	Intermediate_Epithelial_0dpa_vs_1dpa	DAR
chr5-52346010-52347179	7.62945e-93	-1.4237	0.065	0.156	1.56962e-87	rgmb	68366	Intermediate_Epithelial_0dpa_vs_1dpa	DAR
chr24-29605028-29606023	1.09793e-92	1.43528	0.208	0.075	2.2588e-87	si:ch73-383g2.1	16321	Intermediate_Epithelial_0dpa_vs_1dpa	DAR
chr17-16719911-16720717	1.23295e-92	-1.64148	0.046	0.126	2.53658e-87	foxn3	0	Intermediate_Epithelial_0dpa_vs_1dpa	DAR
chr9-478801-479868	1.30152e-92	-2.04899	0.027	0.1	2.67765e-87	si:dkey-11f4.20	0	Intermediate_Epithelial_0dpa_vs_1dpa	DAR
chr24-3485030-3486063	1.60587e-92	1.88743	0.143	0.037	3.3038e-87	wdr37	0	Intermediate_Epithelial_0dpa_vs_1dpa	DAR
chr1-557246-558496	1.61031e-92	1.34694	0.227	0.091	3.31292e-87	CU571081.1	0	Intermediate_Epithelial_0dpa_vs_1dpa	DAR
chr17-22125408-22126235	1.6275e-92	-1.59984	0.049	0.132	3.3483e-87	mrps5	0	Intermediate_Epithelial_0dpa_vs_1dpa	DAR
chr6-1851187-1852188	1.92626e-92	-1.16597	0.104	0.211	3.96294e-87	dlgap4b	0	Intermediate_Epithelial_0dpa_vs_1dpa	DAR
chr7-19300892-19301890	2.03659e-92	2.20318	0.115	0.025	4.18991e-87	dock11	0	Intermediate_Epithelial_0dpa_vs_1dpa	DAR
chr23-29880962-29881792	2.22463e-92	1.71787	0.163	0.049	4.57678e-87	aurkaip1	1423	Intermediate_Epithelial_0dpa_vs_1dpa	DAR
chr23-15378519-15379273	2.44106e-92	-1.22207	0.095	0.192	5.02205e-87	CR759764.1	25269	Intermediate_Epithelial_0dpa_vs_1dpa	DAR
chr23-10333860-10334483	2.47765e-92	-1.42351	0.067	0.156	5.09732e-87	krt18a.1	13367	Intermediate_Epithelial_0dpa_vs_1dpa	DAR
chr11-42923662-42924773	3.05222e-92	2.25457	0.112	0.023	6.2794e-87	pcdh20	4690	Intermediate_Epithelial_0dpa_vs_1dpa	DAR
chr8-42932205-42933166	3.40951e-92	2.12808	0.122	0.028	7.01445e-87	slc23a2	0	Intermediate_Epithelial_0dpa_vs_1dpa	DAR
chr1-36144483-36145417	3.7204e-92	-1.28877	0.082	0.177	7.65406e-87	znf827	0	Intermediate_Epithelial_0dpa_vs_1dpa	DAR
chr21-40167639-40168415	4.95949e-92	1.95766	0.136	0.035	1.02033e-86	slco2b1	0	Intermediate_Epithelial_0dpa_vs_1dpa	DAR
chr4-9890523-9892188	5.4322e-92	-1.16609	0.1	0.197	1.11758e-86	adm2a	0	Intermediate_Epithelial_0dpa_vs_1dpa	DAR
chr17-45654168-45655360	6.79883e-92	1.32421	0.23	0.094	1.39874e-86	zgc:162184	0	Intermediate_Epithelial_0dpa_vs_1dpa	DAR
chr7-37258543-37259918	8.68732e-92	-2.00733	0.029	0.102	1.78726e-86	sall1a	99085	Intermediate_Epithelial_0dpa_vs_1dpa	DAR
chr1-47360851-47361953	1.02695e-91	1.02399	0.326	0.168	2.11277e-86	bcl9	0	Intermediate_Epithelial_0dpa_vs_1dpa	DAR
chr10-45276314-45277035	1.77228e-91	-1.57284	0.055	0.137	3.64614e-86	zmiz2	0	Intermediate_Epithelial_0dpa_vs_1dpa	DAR
chr9-24344173-24349979	2.65595e-91	-1.77572	0.038	0.115	5.46413e-86	tmeff2a	0	Intermediate_Epithelial_0dpa_vs_1dpa	DAR
chr6-43210042-43211298	3.00623e-91	-1.67749	0.043	0.124	6.18479e-86	si:dkey-178o16.4	7552	Intermediate_Epithelial_0dpa_vs_1dpa	DAR
chr23-17120347-17121585	3.51614e-91	1.4902	0.197	0.071	7.23383e-86	commd7	6254	Intermediate_Epithelial_0dpa_vs_1dpa	DAR
chr23-5673936-5675102	3.52747e-91	0.851618	0.406	0.237	7.25713e-86	tnnt2a	0	Intermediate_Epithelial_0dpa_vs_1dpa	DAR
chr1-21157279-21158039	3.54656e-91	-1.59133	0.049	0.134	7.29641e-86	si:dkey-253i9.4	0	Intermediate_Epithelial_0dpa_vs_1dpa	DAR
chr12-33391684-33392135	3.60045e-91	0.982135	0.335	0.172	7.40729e-86	fasn	0	Intermediate_Epithelial_0dpa_vs_1dpa	DAR
chr20-38753495-38754352	3.69326e-91	-1.5876	0.05	0.136	7.59821e-86	trim54	0	Intermediate_Epithelial_0dpa_vs_1dpa	DAR
chr5-59308895-59309937	4.92943e-91	-1.13967	0.111	0.212	1.01414e-85	rasa4	0	Intermediate_Epithelial_0dpa_vs_1dpa	DAR
chr23-35901173-35902115	7.61893e-91	1.21352	0.255	0.113	1.56746e-85	rarga	0	Intermediate_Epithelial_0dpa_vs_1dpa	DAR
chr12-31654304-31656339	8.45636e-91	-1.5746	0.052	0.136	1.73974e-85	dnmbp	0	Intermediate_Epithelial_0dpa_vs_1dpa	DAR
chr25-13786573-13787445	8.62457e-91	1.91003	0.138	0.036	1.77435e-85	ckap5	0	Intermediate_Epithelial_0dpa_vs_1dpa	DAR
chr13-22681833-22682348	8.85843e-91	1.528	0.186	0.066	1.82246e-85	glud1a	0	Intermediate_Epithelial_0dpa_vs_1dpa	DAR
chr11-5667581-5669034	9.68494e-91	2.35512	0.105	0.02	1.9925e-85	r3hdm4	0	Intermediate_Epithelial_0dpa_vs_1dpa	DAR
chr6-52960301-52961250	9.94257e-91	-1.80987	0.035	0.107	2.0455e-85	uba7	0	Intermediate_Epithelial_0dpa_vs_1dpa	DAR
chr13-41706485-41707427	9.95811e-91	-1.4886	0.06	0.142	2.0487e-85	CABZ01117863.1	43396	Intermediate_Epithelial_0dpa_vs_1dpa	DAR
chr2-5526552-5527600	1.24755e-90	1.47397	0.198	0.071	2.5666e-85	crfb16	0	Intermediate_Epithelial_0dpa_vs_1dpa	DAR
chr2-22852841-22853709	1.2979e-90	-1.45097	0.061	0.146	2.6702e-85	amotl2b	0	Intermediate_Epithelial_0dpa_vs_1dpa	DAR
[truncated: 54,269 more rows]

## Sheet: Table S3C
Supplementary Table S3. Differentially accessible regions identified between stages within each major cell type
[truncated: 60,576 more rows]

[truncated: 3 more sheets: Table S3D, Table S3E, Table S3F]
