# Supplementary material for: Common and specific gene regulatory programs in zebrafish caudal fin regeneration at single-cell resolution
Source: HighWire-hosted journal article supplement (doi:10.1101/gr.279372.124), 2025-01-01
Supplement: Supplemental_Table_S4.xlsx [file Supplemental_Table_S4.xlsx]

## Sheet: Table S4A
Table S4 Peak-to-gene links and enhancer validation record
A. Cell type subset-identified and full dataset-identified peak-to-gene links combined list
peak-to-gene correlation coefficient score	gene	peak	peak-to-gene correlation coefficient zscore	pvalue	subset for identifing peak-to-gene-links	annotation	distance to nearest gene TSS (ChIPseeker)	nearestGene(ChIPseeker)	peak-to-gene links
0.0597964	gpa33a	chr1-18421-19736	4.13041	1.81061e-05	Superficial_Epithelial	Promoter	0	nfkbiz	chr1-18421-19736@gpa33a
0.0717959	gpa33a	chr1-43691-45160	3.87882	5.24821e-05	Superficial_Epithelial	Promoter	0	tmem39a	chr1-43691-45160@gpa33a
0.0598254	gpa33a	chr1-48757-51055	3.90537	4.70413e-05	Superficial_Epithelial	Promoter	0	ildr1a	chr1-48757-51055@gpa33a
0.0594034	gpa33a	chr1-59615-61112	3.84871	5.93706e-05	Superficial_Epithelial	Exon	3717	NA	chr1-59615-61112@gpa33a
0.0523879	gpa33a	chr1-69471-72786	2.85848	0.00212836	Superficial_Epithelial	Promoter	0	gpa33a	chr1-69471-72786@gpa33a
0.051797	gpa33a	chr1-93249-93935	3.02378	0.00124821	Superficial_Epithelial	Intergenic	-15863	f7l	chr1-93249-93935@gpa33a
0.0515529	gpa33a	chr1-171461-172599	1.83958	0.0329149	Superficial_Epithelial	Exon	-3984	NA	chr1-171461-172599@gpa33a
0.0565599	grtp1a	chr1-174767-175598	2.53309	0.00565309	Superficial_Epithelial	Promoter	-985	NA	chr1-174767-175598@grtp1a
0.0705197	grtp1a	chr1-188566-191080	4.06561	2.39538e-05	Superficial_Epithelial	Promoter	891	grtp1a	chr1-188566-191080@grtp1a
0.0586701	grtp1a	chr1-191726-193622	3.30496	0.000474957	Superficial_Epithelial	Promoter	0	grtp1a	chr1-191726-193622@grtp1a
0.0506852	cenpe	chr1-325833-326661	3.46572	0.000264411	Superficial_Epithelial	Exon	11784	gas6	chr1-325833-326661@cenpe
0.0612023	rasa3	chr1-318600-318775	6.28694	1.61887e-10	Superficial_Epithelial	Exon	19670	gas6	chr1-318600-318775@rasa3
0.0852326	jam2a	chr1-571512-572585	4.5484	2.70274e-06	Superficial_Epithelial	Intron	-3859	mir155	chr1-571512-572585@jam2a
0.0619254	jam2a	chr1-594309-595140	3.20955	0.000664713	Superficial_Epithelial	Promoter	0	jam2a	chr1-594309-595140@jam2a
0.0518778	jam2a	chr1-596666-597878	1.96066	0.0249596	Superficial_Epithelial	Intron	1930	jam2a	chr1-596666-597878@jam2a
0.0585109	jam2a	chr1-669050-670129	2.08162	0.0186884	Superficial_Epithelial	Promoter	0	cyyr1	chr1-669050-670129@jam2a
0.0519277	cyyr1	chr1-596666-597878	2.20876	0.0135957	Superficial_Epithelial	Intron	1930	jam2a	chr1-596666-597878@cyyr1
0.050278	appa	chr1-635676-636219	2.90182	0.00185499	Superficial_Epithelial	Exon	-2320	appa	chr1-635676-636219@appa
0.0539694	cyyr1	chr1-635676-636219	3.37465	0.00036955	Superficial_Epithelial	Exon	-2320	appa	chr1-635676-636219@cyyr1
0.108661	appa	chr1-643620-645228	3.04089	0.00117942	Superficial_Epithelial	Intron	-10264	appa	chr1-643620-645228@appa
0.0684804	appa	chr1-650781-651264	3.40208	0.000334378	Superficial_Epithelial	Intron	5429	appa	chr1-650781-651264@appa
0.137147	appa	chr1-655386-656909	4.96109	3.50494e-07	Superficial_Epithelial	Promoter	0	appa	chr1-655386-656909@appa
0.0784661	appa	chr1-663244-664121	2.0204	0.021671	Superficial_Epithelial	Intron	5596	cyyr1	chr1-663244-664121@appa
0.0751697	appa	chr1-665969-666462	3.60747	0.000154599	Superficial_Epithelial	Intron	3255	cyyr1	chr1-665969-666462@appa
0.08283	appa	chr1-669050-670129	2.23838	0.0125981	Superficial_Epithelial	Promoter	0	cyyr1	chr1-669050-670129@appa
0.115375	appa	chr1-679416-682623	5.02893	2.46614e-07	Superficial_Epithelial	Promoter	0	adamts1	chr1-679416-682623@appa
0.129161	appa	chr1-712629-714989	6.36434	9.80647e-11	Superficial_Epithelial	Promoter	0	adamts5	chr1-712629-714989@appa
0.0757619	appa	chr1-746729-747678	2.40779	0.00802469	Superficial_Epithelial	Intergenic	-32103	adamts5	chr1-746729-747678@appa
0.0868384	appa	chr1-752934-753675	3.56612	0.000181153	Superficial_Epithelial	Intergenic	-38308	adamts5	chr1-752934-753675@appa
0.0780893	cyyr1	chr1-663244-664121	3.2071	0.000670411	Superficial_Epithelial	Intron	5596	cyyr1	chr1-663244-664121@cyyr1
0.0674026	cyyr1	chr1-669050-670129	2.93726	0.00165561	Superficial_Epithelial	Promoter	0	cyyr1	chr1-669050-670129@cyyr1
0.0668652	cyyr1	chr1-679416-682623	3.04262	0.00117265	Superficial_Epithelial	Promoter	0	adamts1	chr1-679416-682623@cyyr1
0.0610806	n6amt1	chr1-946087-946519	6.74471	7.66671e-12	Superficial_Epithelial	Intergenic	-15088	n6amt1	chr1-946087-946519@n6amt1
0.0535998	runx1	chr1-1383155-1384037	2.50635	0.00609917	Superficial_Epithelial	Intron	18266	runx1	chr1-1383155-1384037@runx1
0.0521302	runx1	chr1-1388003-1388929	2.18154	0.0145717	Superficial_Epithelial	Intron	13374	runx1	chr1-1388003-1388929@runx1
0.0687751	runx1	chr1-1458367-1459573	3.75056	8.82198e-05	Superficial_Epithelial	Intergenic	-56064	runx1	chr1-1458367-1459573@runx1
0.0674224	runx1	chr1-1466082-1466862	3.47863	0.00025199	Superficial_Epithelial	Intergenic	-63779	runx1	chr1-1466082-1466862@runx1
0.0677761	runx1	chr1-1487973-1488868	3.09369	0.000988433	Superficial_Epithelial	Intergenic	-85670	runx1	chr1-1487973-1488868@runx1
0.0706384	runx1	chr1-1502215-1503177	3.87241	5.38825e-05	Superficial_Epithelial	Intergenic	-72306	mir459	chr1-1502215-1503177@runx1
0.0898846	si:ch211-132g1.7	chr1-1984380-1985726	5.00708	2.76309e-07	Superficial_Epithelial	Intron	-39359	slc5a3a	chr1-1984380-1985726@si:ch211-132g1.7
0.0755791	oxgr1a.1	chr1-2030183-2032335	7.80846	2.89457e-15	Superficial_Epithelial	Intergenic	5098	slc5a3a	chr1-2030183-2032335@oxgr1a.1
0.0639126	oxgr1a.1	chr1-2039857-2040459	7.10732	5.916e-13	Superficial_Epithelial	Intergenic	11140	oxgr1a.1	chr1-2039857-2040459@oxgr1a.1
0.052272	mbnl2	chr1-2101042-2103243	4.28208	9.25754e-06	Superficial_Epithelial	Promoter	0	mbnl2	chr1-2101042-2103243@mbnl2
0.0629956	gpc5a	chr1-3231421-3232348	3.72944	9.59517e-05	Superficial_Epithelial	Intron	62697	gpc5a	chr1-3231421-3232348@gpc5a
0.0768691	gpc5a	chr1-3268909-3269636	3.79346	7.42817e-05	Superficial_Epithelial	Intron	25409	gpc5a	chr1-3268909-3269636@gpc5a
0.0639314	gpc5a	chr1-3277565-3278582	3.13207	0.000867878	Superficial_Epithelial	Intron	16463	gpc5a	chr1-3277565-3278582@gpc5a
0.0513376	slitrk6	chr1-4096778-4098147	2.04046	0.0206521	Superficial_Epithelial	Intergenic	-3594	slitrk6	chr1-4096778-4098147@slitrk6
0.0504656	slitrk6	chr1-4098896-4099383	2.52411	0.00579951	Superficial_Epithelial	Intergenic	-2358	slitrk6	chr1-4098896-4099383@slitrk6
0.0601913	slitrk6	chr1-4164855-4165850	2.42285	0.00769964	Superficial_Epithelial	Intergenic	44802	NA	chr1-4164855-4165850@slitrk6
0.062215	spry2	chr1-5225778-5226396	5.83437	2.69976e-09	Superficial_Epithelial	Intergenic	-47085	spry2	chr1-5225778-5226396@spry2
0.0650215	spry2	chr1-5275579-5276101	4.98266	3.13583e-07	Superficial_Epithelial	Promoter	0	spry2	chr1-5275579-5276101@spry2
0.09786	spry2	chr1-5281666-5282065	9.27297	9.05195e-21	Superficial_Epithelial	Intergenic	5855	spry2	chr1-5281666-5282065@spry2
0.093331	spry2	chr1-5296825-5297203	6.25004	2.05174e-10	Superficial_Epithelial	Intergenic	21014	spry2	chr1-5296825-5297203@spry2
0.0749212	ndfip2	chr1-5299879-5301225	1.65919	0.0485388	Superficial_Epithelial	Intergenic	24068	spry2	chr1-5299879-5301225@ndfip2
0.0637958	ndfip2	chr1-5325830-5326511	1.73648	0.0412394	Superficial_Epithelial	Intergenic	50019	spry2	chr1-5325830-5326511@ndfip2
0.059485	ndfip2	chr1-5349430-5349984	1.98543	0.0235482	Superficial_Epithelial	Intergenic	44768	ndfip2	chr1-5349430-5349984@ndfip2
0.153848	ndfip2	chr1-5375636-5376607	4.30753	8.25436e-06	Superficial_Epithelial	Intron	18145	ndfip2	chr1-5375636-5376607@ndfip2
0.096289	ndfip2	chr1-5385001-5386512	2.44171	0.00730897	Superficial_Epithelial	Intron	8240	ndfip2	chr1-5385001-5386512@ndfip2
0.107521	ndfip2	chr1-5393275-5395117	2.87403	0.00202637	Superficial_Epithelial	Promoter	0	ndfip2	chr1-5393275-5395117@ndfip2
0.101769	ndfip2	chr1-5484366-5486328	2.60634	0.00457581	Superficial_Epithelial	Promoter	0	atic	chr1-5484366-5486328@ndfip2
0.124896	ndfip2	chr1-5492704-5493769	2.92007	0.00174978	Superficial_Epithelial	Intron	-3516	atic	chr1-5492704-5493769@ndfip2
0.0500092	fn1b	chr1-5457658-5458066	1.82362	0.034105	Superficial_Epithelial	Intron	-2156	mnx2b	chr1-5457658-5458066@fn1b
0.0534389	fn1b	chr1-5465599-5465998	3.13008	0.000873803	Superficial_Epithelial	Intron	-10097	mnx2b	chr1-5465599-5465998@fn1b
0.127985	fn1b	chr1-5484366-5486328	1.96156	0.0249071	Superficial_Epithelial	Promoter	0	atic	chr1-5484366-5486328@fn1b
0.166945	fn1b	chr1-5492704-5493769	2.22591	0.0130103	Superficial_Epithelial	Intron	-3516	atic	chr1-5492704-5493769@fn1b
0.192585	fn1b	chr1-5502038-5504000	3.57934	0.000172231	Superficial_Epithelial	3' UTR	4753	atic	chr1-5502038-5504000@fn1b
0.058528	fn1b	chr1-5511344-5511635	1.93751	0.0263412	Superficial_Epithelial	Promoter	27	fn1b	chr1-5511344-5511635@fn1b
0.0803947	fn1b	chr1-5511839-5512269	2.79042	0.00263196	Superficial_Epithelial	Promoter	-177	fn1b	chr1-5511839-5512269@fn1b
0.127597	fn1b	chr1-5512322-5514609	2.04342	0.0205054	Superficial_Epithelial	Promoter	-660	fn1b	chr1-5512322-5514609@fn1b
0.0524737	fn1b	chr1-5521812-5522205	2.09638	0.0180244	Superficial_Epithelial	Exon	-10150	fn1b	chr1-5521812-5522205@fn1b
0.0555801	fn1b	chr1-5525354-5525759	1.84429	0.0325703	Superficial_Epithelial	Intron	-13692	fn1b	chr1-5525354-5525759@fn1b
0.114032	fn1b	chr1-5531876-5532527	3.46601	0.000264123	Superficial_Epithelial	Intron	10038	fn1b	chr1-5531876-5532527@fn1b
0.110973	fn1b	chr1-5533746-5534724	2.10607	0.0175991	Superficial_Epithelial	Exon	7841	fn1b	chr1-5533746-5534724@fn1b
0.0948577	fn1b	chr1-5535133-5535569	3.41341	0.000320782	Superficial_Epithelial	Intron	6996	fn1b	chr1-5535133-5535569@fn1b
0.0989106	fn1b	chr1-5537467-5538274	2.09519	0.018077	Superficial_Epithelial	Exon	4291	fn1b	chr1-5537467-5538274@fn1b
0.0857582	fn1b	chr1-5539141-5539344	3.47651	0.000253992	Superficial_Epithelial	Intron	3221	fn1b	chr1-5539141-5539344@fn1b
0.0865287	fn1b	chr1-5540560-5540879	2.03652	0.0208492	Superficial_Epithelial	Exon	1686	fn1b	chr1-5540560-5540879@fn1b
0.23203	fn1b	chr1-5542412-5543279	5.45526	2.44503e-08	Superficial_Epithelial	Promoter	0	fn1b	chr1-5542412-5543279@fn1b
0.104379	fn1b	chr1-5545546-5545953	2.09998	0.0178653	Superficial_Epithelial	Intergenic	-2481	fn1b	chr1-5545546-5545953@fn1b
0.241007	fn1b	chr1-5547875-5549253	5.38987	3.52549e-08	Superficial_Epithelial	Intergenic	-4810	fn1b	chr1-5547875-5549253@fn1b
0.115862	fn1b	chr1-5553594-5554706	1.72998	0.0418166	Superficial_Epithelial	Intergenic	-10529	fn1b	chr1-5553594-5554706@fn1b
0.177854	fn1b	chr1-5555832-5557385	3.19552	0.000697885	Superficial_Epithelial	Intergenic	-12767	fn1b	chr1-5555832-5557385@fn1b
0.195933	fn1b	chr1-5564389-5565984	2.93979	0.00164219	Superficial_Epithelial	Intergenic	-10167	cpo	chr1-5564389-5565984@fn1b
0.172011	fn1b	chr1-5573493-5575086	2.93251	0.00168119	Superficial_Epithelial	Intergenic	-1065	cpo	chr1-5573493-5575086@fn1b
0.0556253	nrp2a	chr1-5833088-5834019	3.68096	0.00011618	Superficial_Epithelial	Intron	-87058	nrp2a	chr1-5833088-5834019@nrp2a
0.0507935	mylz3	chr1-7522888-7523418	5.63109	8.9536e-09	Superficial_Epithelial	Exon	5434	lancl1	chr1-7522888-7523418@mylz3
0.0513077	mxa	chr1-7568971-7571156	3.54707	0.000194771	Superficial_Epithelial	Promoter	0	mxa	chr1-7568971-7571156@mxa
0.0945293	mxb	chr1-7568971-7571156	5.51791	1.71528e-08	Superficial_Epithelial	Promoter	0	mxa	chr1-7568971-7571156@mxb
0.0605194	mxa	chr1-7581709-7583115	4.15699	1.61231e-05	Superficial_Epithelial	Promoter	0	mxb	chr1-7581709-7583115@mxa
0.118063	mxb	chr1-7581709-7583115	7.21757	2.64616e-13	Superficial_Epithelial	Promoter	0	mxb	chr1-7581709-7583115@mxb
0.0694938	mxb	chr1-7583434-7584077	3.72552	9.74548e-05	Superficial_Epithelial	Promoter	-575	mxb	chr1-7583434-7584077@mxb
0.0604751	BX908756.3	chr1-7851338-7851639	8.42349	1.8271e-17	Superficial_Epithelial	Exon	-6976	NA	chr1-7851338-7851639@BX908756.3
0.0530698	si:dkey-79f11.10	chr1-7930458-7931298	4.08025	2.24937e-05	Superficial_Epithelial	Promoter	0	ifi44a8	chr1-7930458-7931298@si:dkey-79f11.10
0.0757876	si:dkey-79f11.10	chr1-7934357-7934719	6.99421	1.3338e-12	Superficial_Epithelial	Downstream (1-2kb)	-3678	ifi44a8	chr1-7934357-7934719@si:dkey-79f11.10
0.0525707	si:dkey-79f11.10	chr1-8019313-8020876	4.44043	4.489e-06	Superficial_Epithelial	Promoter	0	ifi44a1	chr1-8019313-8020876@si:dkey-79f11.10
0.0533304	si:dkey-79f11.7	chr1-7930458-7931298	5.21814	9.03634e-08	Superficial_Epithelial	Promoter	0	ifi44a8	chr1-7930458-7931298@si:dkey-79f11.7
0.0908796	si:dkeyp-9d4.2	chr1-7930458-7931298	6.74627	7.58464e-12	Superficial_Epithelial	Promoter	0	ifi44a8	chr1-7930458-7931298@si:dkeyp-9d4.2
0.0509216	si:dkeyp-9d4.2	chr1-7934357-7934719	4.12831	1.8272e-05	Superficial_Epithelial	Downstream (1-2kb)	-3678	ifi44a8	chr1-7934357-7934719@si:dkeyp-9d4.2
0.0765967	si:dkeyp-9d4.2	chr1-8019313-8020876	6.83126	4.20862e-12	Superficial_Epithelial	Promoter	0	ifi44a1	chr1-8019313-8020876@si:dkeyp-9d4.2
0.0522195	si:dkeyp-9d4.3	chr1-8090173-8090835	5.72711	5.10789e-09	Superficial_Epithelial	Intron	10660	si:dkeyp-9d4.3	chr1-8090173-8090835@si:dkeyp-9d4.3
0.0626245	si:dkeyp-9d4.3	chr1-8099766-8101852	6.62071	1.78733e-11	Superficial_Epithelial	Promoter	0	si:dkeyp-9d4.3	chr1-8099766-8101852@si:dkeyp-9d4.3
0.0564302	FAM83G	chr1-8099766-8101852	2.86426	0.0020899	Superficial_Epithelial	Promoter	0	si:dkeyp-9d4.3	chr1-8099766-8101852@FAM83G
0.0571762	FAM83G	chr1-8122786-8123901	2.23501	0.0127085	Superficial_Epithelial	Exon	11777	si:dkeyp-9d4.5	chr1-8122786-8123901@FAM83G
0.0519881	FAM83G	chr1-8140195-8141823	2.78514	0.00267522	Superficial_Epithelial	Promoter	0	LOC101882918	chr1-8140195-8141823@FAM83G
0.0576983	FAM83G	chr1-8159955-8160669	2.78759	0.00265506	Superficial_Epithelial	Exon	-18820	LOC101882918	chr1-8159955-8160669@FAM83G
0.0521295	FAM83G	chr1-8170944-8171700	2.6307	0.0042605	Superficial_Epithelial	Intron	20718	grapb	chr1-8170944-8171700@FAM83G
0.0534432	FAM83G	chr1-8174513-8174960	3.29355	0.000494657	Superficial_Epithelial	Intron	17458	grapb	chr1-8174513-8174960@FAM83G
0.100405	FAM83G	chr1-8187241-8188814	4.84581	6.30468e-07	Superficial_Epithelial	Intron	3604	grapb	chr1-8187241-8188814@FAM83G
0.06583	alkbh5	chr1-8501454-8501732	7.83615	2.32285e-15	Superficial_Epithelial	Intron	-7021	alkbh5	chr1-8501454-8501732@alkbh5
0.0527195	fbxl18	chr1-8639830-8640048	6.72225	8.94697e-12	Superficial_Epithelial	Exon	6893	fbxl18	chr1-8639830-8640048@fbxl18
0.0523983	fbxl18	chr1-8646567-8650289	6.21803	2.51722e-10	Superficial_Epithelial	Promoter	0	fbxl18	chr1-8646567-8650289@fbxl18
0.16035	actb1	chr1-8646567-8650289	11.036	1.28132e-28	Superficial_Epithelial	Promoter	0	fbxl18	chr1-8646567-8650289@actb1
0.0792312	actb1	chr1-8653391-8656525	5.19134	1.0439e-07	Superficial_Epithelial	Promoter	-6	actb1	chr1-8653391-8656525@actb1
0.0513694	si:ch211-14k19.8	chr1-9113473-9113755	10.0573	4.26465e-24	Superficial_Epithelial	Exon	1181	si:ch211-14k19.8	chr1-9113473-9113755@si:ch211-14k19.8
0.0509872	micall2b	chr1-9457470-9458534	1.96056	0.0249653	Superficial_Epithelial	Downstream (1-2kb)	27405	micall2b	chr1-9457470-9458534@micall2b
0.0781651	micall2b	chr1-9475392-9476573	3.79884	7.26883e-05	Superficial_Epithelial	Exon	9366	micall2b	chr1-9475392-9476573@micall2b
0.0751594	micall2b	chr1-9485569-9486871	3.97401	3.53366e-05	Superficial_Epithelial	Promoter	0	micall2b	chr1-9485569-9486871@micall2b
0.0520567	pmm2	chr1-9860006-9860934	4.81175	7.48085e-07	Superficial_Epithelial	Promoter	0	pmm2	chr1-9860006-9860934@pmm2
0.0636302	si:dkeyp-75b4.7	chr1-9896080-9896473	7.877	1.67662e-15	Superficial_Epithelial	Exon	9083	rgs11	chr1-9896080-9896473@si:dkeyp-75b4.7
0.074761	si:dkey-31e10.5	chr1-10620003-10620693	9.31394	6.15872e-21	Superficial_Epithelial	Promoter	0	trpc5a	chr1-10620003-10620693@si:dkey-31e10.5
0.056584	knl1	chr1-11125095-11125350	4.30521	8.34145e-06	Superficial_Epithelial	3' UTR	17407	knstrn	chr1-11125095-11125350@knl1
0.0786334	b4galt1	chr1-12159661-12161406	6.69634	1.06854e-11	Superficial_Epithelial	Promoter	0	NA	chr1-12159661-12161406@b4galt1
0.0500863	clta	chr1-12347686-12349163	2.8429	0.00223526	Superficial_Epithelial	Promoter	0	clta	chr1-12347686-12349163@clta
0.0537539	noctb	chr1-14012222-14012547	7.81646	2.7165e-15	Superficial_Epithelial	Intergenic	-7898	hpf1	chr1-14012222-14012547@noctb
0.0628061	cxcl8a	chr1-14269819-14270724	5.22513	8.70144e-08	Superficial_Epithelial	Intergenic	-11410	NA	chr1-14269819-14270724@cxcl8a
0.0754096	stim2a	chr1-14487187-14488140	8.35016	3.4084e-17	Superficial_Epithelial	3' UTR	15042	si:dkey-194g4.1	chr1-14487187-14488140@stim2a
0.063984	pcdh7a	chr1-15150066-15150654	3.2547	0.000567569	Superficial_Epithelial	Intron	12165	pcdh7a	chr1-15150066-15150654@pcdh7a
0.0818125	pcdh7a	chr1-15159362-15160508	3.66901	0.000121744	Superficial_Epithelial	Intron	21461	pcdh7a	chr1-15159362-15160508@pcdh7a
0.0676082	pcdh7a	chr1-15169643-15170109	3.52705	0.00021011	Superficial_Epithelial	Intron	31742	pcdh7a	chr1-15169643-15170109@pcdh7a
0.0536767	dlc1	chr1-15289260-15290039	1.97843	0.0239402	Superficial_Epithelial	Intergenic	30619	pi4k2b	chr1-15289260-15290039@dlc1
0.0541251	dlc1	chr1-15322573-15323557	1.68014	0.0464653	Superficial_Epithelial	Intron	5720	dlc1	chr1-15322573-15323557@dlc1
0.0633545	dlc1	chr1-15328841-15329670	2.5157	0.00593979	Superficial_Epithelial	Promoter	0	dlc1	chr1-15328841-15329670@dlc1
0.0660102	dlc1	chr1-15332663-15333246	2.87188	0.00204017	Superficial_Epithelial	Intergenic	-3386	dlc1	chr1-15332663-15333246@dlc1
0.117266	dlc1	chr1-15347002-15348071	6.3833	8.66534e-11	Superficial_Epithelial	Intergenic	-17725	dlc1	chr1-15347002-15348071@dlc1
0.10443	dlc1	chr1-15354405-15355236	4.47228	3.86942e-06	Superficial_Epithelial	Downstream (<1kb)	-25128	dlc1	chr1-15354405-15355236@dlc1
0.0583298	dlc1	chr1-15382772-15383233	2.46208	0.00690666	Superficial_Epithelial	Intron	-53495	dlc1	chr1-15382772-15383233@dlc1
0.0530995	dlc1	chr1-15420056-15420336	3.7537	8.71219e-05	Superficial_Epithelial	Intron	49330	NA	chr1-15420056-15420336@dlc1
0.061593	CR848833.1	chr1-15494348-15494848	5.22634	8.6448e-08	Superficial_Epithelial	Intron	-1620	NA	chr1-15494348-15494848@CR848833.1
0.0607	CR848833.1	chr1-15509173-15510149	4.33663	7.23403e-06	Superficial_Epithelial	Intergenic	-11021	NA	chr1-15509173-15510149@CR848833.1
0.0698993	CR848833.1	chr1-15574633-15575057	5.24482	7.82195e-08	Superficial_Epithelial	Intergenic	-76481	NA	chr1-15574633-15575057@CR848833.1
0.0698045	micu3a	chr1-16331314-16332082	3.63441	0.000139311	Superficial_Epithelial	Intergenic	62732	fgf20a	chr1-16331314-16332082@micu3a
0.0763882	micu3a	chr1-16343441-16344431	3.55133	0.000191646	Superficial_Epithelial	Intergenic	50383	fgf20a	chr1-16343441-16344431@micu3a
0.0596678	micu3a	chr1-16365808-16366973	2.57574	0.00500129	Superficial_Epithelial	Intergenic	27841	fgf20a	chr1-16365808-16366973@micu3a
0.0778945	micu3a	chr1-16383224-16383871	4.06117	2.44135e-05	Superficial_Epithelial	Intergenic	10943	fgf20a	chr1-16383224-16383871@micu3a
0.0861591	micu3a	chr1-16387822-16388384	4.69966	1.30297e-06	Superficial_Epithelial	Intergenic	6430	fgf20a	chr1-16387822-16388384@micu3a
0.106063	micu3a	chr1-16394139-16395360	5.88096	2.03949e-09	Superficial_Epithelial	Promoter	0	fgf20a	chr1-16394139-16395360@micu3a
0.0650402	micu3a	chr1-16434109-16434846	3.19458	0.00070017	Superficial_Epithelial	Intron	-23679	NA	chr1-16434109-16434846@micu3a
0.0531417	mtus1b	chr1-16606043-16606782	2.95919	0.00154223	Superficial_Epithelial	Intron	5345	mtus1b	chr1-16606043-16606782@mtus1b
0.189375	fat1a	chr1-17373917-17375382	4.32841	7.50939e-06	Superficial_Epithelial	Intergenic	-1540	fat1a	chr1-17373917-17375382@fat1a
0.185664	fat1a	chr1-17376629-17377884	4.09036	2.15355e-05	Superficial_Epithelial	Promoter	0	fat1a	chr1-17376629-17377884@fat1a
0.101532	fat1a	chr1-17384249-17385151	3.05786	0.00111463	Superficial_Epithelial	Intron	7327	fat1a	chr1-17384249-17385151@fat1a
0.067745	fat1a	chr1-17386803-17386988	2.89052	0.00192304	Superficial_Epithelial	Intron	9881	fat1a	chr1-17386803-17386988@fat1a
0.0944279	fat1a	chr1-17391500-17392502	2.23657	0.0126572	Superficial_Epithelial	Intron	14578	fat1a	chr1-17391500-17392502@fat1a
0.0670922	fat1a	chr1-17396138-17397240	2.3415	0.0096032	Superficial_Epithelial	Intron	19216	fat1a	chr1-17396138-17397240@fat1a
0.099023	fat1a	chr1-17399125-17399527	3.43083	0.000300866	Superficial_Epithelial	Intron	22203	fat1a	chr1-17399125-17399527@fat1a
0.148651	fat1a	chr1-17400998-17402002	2.91839	0.00175921	Superficial_Epithelial	Intron	24076	fat1a	chr1-17400998-17402002@fat1a
0.0693307	fat1a	chr1-17404167-17404445	2.69477	0.00352191	Superficial_Epithelial	Intron	27245	fat1a	chr1-17404167-17404445@fat1a
0.054108	fat1a	chr1-17407570-17407760	2.41911	0.00777931	Superficial_Epithelial	Intron	30648	fat1a	chr1-17407570-17407760@fat1a
0.180096	fat1a	chr1-17410182-17411190	3.7739	8.03585e-05	Superficial_Epithelial	Intron	33260	fat1a	chr1-17410182-17411190@fat1a
0.191754	fat1a	chr1-17415129-17416280	5.36437	4.0617e-08	Superficial_Epithelial	Intron	38207	fat1a	chr1-17415129-17416280@fat1a
0.0651438	fat1a	chr1-17424645-17425321	1.83695	0.0331084	Superficial_Epithelial	Intron	41134	NA	chr1-17424645-17425321@fat1a
0.0890562	fat1a	chr1-17437484-17438176	2.75501	0.00293455	Superficial_Epithelial	Intron	28279	NA	chr1-17437484-17438176@fat1a
0.161086	fat1a	chr1-17440483-17441415	4.40514	5.28579e-06	Superficial_Epithelial	Intron	25040	NA	chr1-17440483-17441415@fat1a
0.0703993	fat1a	chr1-17442921-17443414	3.47284	0.000257488	Superficial_Epithelial	Intron	23041	NA	chr1-17442921-17443414@fat1a
0.0568471	fat1a	chr1-17451803-17452379	2.4061	0.00806183	Superficial_Epithelial	Exon	14076	NA	chr1-17451803-17452379@fat1a
0.097402	fat1a	chr1-17456825-17458585	2.01592	0.0219043	Superficial_Epithelial	Intron	7870	NA	chr1-17456825-17458585@fat1a
0.0673618	casp3a	chr1-17569916-17570340	5.17494	1.13994e-07	Superficial_Epithelial	Promoter	0	acsl1a	chr1-17569916-17570340@casp3a
0.0746528	casp3a	chr1-17574104-17575533	3.98856	3.32384e-05	Superficial_Epithelial	Intron	-4091	acsl1a	chr1-17574104-17575533@casp3a
0.0506059	casp3a	chr1-17586960-17587898	2.64522	0.00408193	Superficial_Epithelial	Promoter	0	acsl1a	chr1-17586960-17587898@casp3a
0.0787812	tbc1d1	chr1-18740910-18741983	2.66293	0.00387322	Superficial_Epithelial	Promoter	0	tbc1d1	chr1-18740910-18741983@tbc1d1
0.0597419	tbc1d1	chr1-18751120-18752865	1.83609	0.033172	Superficial_Epithelial	Promoter	0	tbc1d1	chr1-18751120-18752865@tbc1d1
0.050873	rnf38	chr1-18835322-18836381	2.01447	0.0219803	Superficial_Epithelial	Intergenic	12574	zgc:195282	chr1-18835322-18836381@rnf38
0.0517661	rnf38	chr1-18857715-18858538	1.95029	0.0255711	Superficial_Epithelial	Intergenic	-4522	rnf38	chr1-18857715-18858538@rnf38
0.0787197	rnf38	chr1-18859269-18860019	4.1582	1.60384e-05	Superficial_Epithelial	Intergenic	-3041	rnf38	chr1-18859269-18860019@rnf38
0.0549152	rnf38	chr1-18881026-18881995	1.93208	0.0266751	Superficial_Epithelial	Intron	13520	rnf38	chr1-18881026-18881995@rnf38
0.05082	rnf38	chr1-18882994-18883927	2.04695	0.0203317	Superficial_Epithelial	Intron	15488	rnf38	chr1-18882994-18883927@rnf38
0.0641408	rnf38	chr1-18888100-18889096	1.97918	0.0238977	Superficial_Epithelial	Intron	20594	rnf38	chr1-18888100-18889096@rnf38
0.0578266	rnf38	chr1-18899652-18901209	2.50995	0.00603737	Superficial_Epithelial	Intron	-19004	rnf38	chr1-18899652-18901209@rnf38
0.0596943	rnf38	chr1-18915481-18916190	2.0314	0.0211073	Superficial_Epithelial	Intron	-4023	rnf38	chr1-18915481-18916190@rnf38
0.0816919	rnf38	chr1-18917953-18919246	3.1124	0.000927859	Superficial_Epithelial	Promoter	-967	rnf38	chr1-18917953-18919246@rnf38
0.0580878	limch1a	chr1-18939295-18941047	6.09447	5.49011e-10	Superficial_Epithelial	Intergenic	19082	rnf38	chr1-18939295-18941047@limch1a
0.0517158	kitb	chr1-19501107-19501790	3.57299	0.000176462	Superficial_Epithelial	Promoter	532	kitb	chr1-19501107-19501790@kitb
0.134355	kitb	chr1-19502133-19502505	10.3459	2.18352e-25	Superficial_Epithelial	Promoter	0	kitb	chr1-19502133-19502505@kitb
0.0506601	kitb	chr1-19506262-19507144	3.1768	0.000744558	Superficial_Epithelial	Intergenic	-3884	kitb	chr1-19506262-19507144@kitb
0.0752214	FNIP2	chr1-19769497-19770319	4.63666	1.77044e-06	Superficial_Epithelial	Intron	4502	fnip2	chr1-19769497-19770319@FNIP2
0.0571855	UBA6	chr1-19902949-19903677	3.29004	0.000500861	Superficial_Epithelial	Intergenic	-26843	apbb2b	chr1-19902949-19903677@UBA6
0.0685184	apbb2b	chr1-19902949-19903677	4.15639	1.61657e-05	Superficial_Epithelial	Intergenic	-26843	apbb2b	chr1-19902949-19903677@apbb2b
0.0500707	ugt8	chr1-20584754-20585759	1.67522	0.0469457	Superficial_Epithelial	Intron	-7894	NA	chr1-20584754-20585759@ugt8
0.0722298	ugt8	chr1-20593182-20594265	2.59858	0.00468052	Superficial_Epithelial	Promoter	0	ugt8	chr1-20593182-20594265@ugt8
0.0562941	ugt8	chr1-20631971-20632377	3.53458	0.000204212	Superficial_Epithelial	Intergenic	-2813	spock3	chr1-20631971-20632377@ugt8
0.0822666	spock3	chr1-20636992-20637345	5.79484	3.41939e-09	Superficial_Epithelial	Intron	1600	spock3	chr1-20636992-20637345@spock3
0.094483	spock3	chr1-20722756-20723527	6.0951	5.4683e-10	Superficial_Epithelial	Intergenic	87364	spock3	chr1-20722756-20723527@spock3
0.055498	tll1	chr1-20778402-20778634	9.91549	1.78248e-23	Superficial_Epithelial	Intron	45777	tll1	chr1-20778402-20778634@tll1
0.0748113	cpe	chr1-20904360-20905247	3.54798	0.000194096	Superficial_Epithelial	Intron	6050	cpe	chr1-20904360-20905247@cpe
0.0561777	si:dkey-253i9.4	chr1-21135930-21136759	5.14489	1.33838e-07	Superficial_Epithelial	3' UTR	24652	si:dkey-253i9.4	chr1-21135930-21136759@si:dkey-253i9.4
0.0813106	si:dkey-253i9.4	chr1-21179642-21181119	5.88759	1.95935e-09	Superficial_Epithelial	Intron	-13871	si:dkey-253i9.4	chr1-21179642-21181119@si:dkey-253i9.4
0.0574255	si:dkey-253i9.4	chr1-21182209-21182723	5.19939	9.99702e-08	Superficial_Epithelial	Intron	-16438	si:dkey-253i9.4	chr1-21182209-21182723@si:dkey-253i9.4
0.0563897	si:dkey-253i9.4	chr1-21202539-21204804	4.04675	2.5967e-05	Superficial_Epithelial	Promoter	0	si:dkey-253i9.4	chr1-21202539-21204804@si:dkey-253i9.4
0.0654901	adamtsl7	chr1-21607525-21608937	4.10543	2.01778e-05	Superficial_Epithelial	Downstream (1-2kb)	-8306	adamtsl7	chr1-21607525-21608937@adamtsl7
0.0570651	chrna6	chr1-22421938-22422132	5.97729	1.1344e-09	Superficial_Epithelial	Intergenic	-5003	LOC108190615	chr1-22421938-22422132@chrna6
0.0729695	anxa5b	chr1-22648129-22648632	2.16793	0.0150818	Superficial_Epithelial	Exon	3394	uchl1	chr1-22648129-22648632@anxa5b
0.104706	anxa5b	chr1-22651265-22652267	3.03793	0.00119106	Superficial_Epithelial	Promoter	0	uchl1	chr1-22651265-22652267@anxa5b
0.059079	anxa5b	chr1-22658881-22659279	1.84137	0.0327835	Superficial_Epithelial	Intron	3973	anxa5b	chr1-22658881-22659279@anxa5b
0.0578949	anxa5b	chr1-22666075-22666473	1.82176	0.034246	Superficial_Epithelial	Intron	8140	NA	chr1-22666075-22666473@anxa5b
0.105035	anxa5b	chr1-22668046-22669912	2.71339	0.0033299	Superficial_Epithelial	Intron	4701	NA	chr1-22668046-22669912@anxa5b
0.0862672	anxa5b	chr1-22677269-22678919	1.68857	0.0456508	Superficial_Epithelial	Promoter	0	fgfbp1b	chr1-22677269-22678919@anxa5b
0.0543204	rpl9	chr1-23273663-23275292	2.07949	0.0187861	Superficial_Epithelial	Promoter	0	lias	chr1-23273663-23275292@rpl9
0.0549371	rpl9	chr1-23311436-23312740	2.18012	0.0146242	Superficial_Epithelial	Promoter	0	ube2kb	chr1-23311436-23312740@rpl9
0.0724564	si:dkeyp-26a9.2	chr1-23526291-23526636	5.77528	3.84123e-09	Superficial_Epithelial	Exon	20625	si:dkeyp-26a9.2	chr1-23526291-23526636@si:dkeyp-26a9.2
0.0748683	si:dkeyp-26a9.2	chr1-23536553-23536821	6.5052	3.87957e-11	Superficial_Epithelial	Intron	21056	fam184b	chr1-23536553-23536821@si:dkeyp-26a9.2
0.133917	slit2	chr1-23783387-23785025	6.24622	2.10253e-10	Superficial_Epithelial	Promoter	0	slit2	chr1-23783387-23785025@slit2
0.0830059	slit2	chr1-23793149-23794138	2.3032	0.0106337	Superficial_Epithelial	Intron	8244	slit2	chr1-23793149-23794138@slit2
0.0707194	slit2	chr1-23800559-23801829	1.80115	0.03584	Superficial_Epithelial	Intron	15654	slit2	chr1-23800559-23801829@slit2
0.0724859	slit2	chr1-23808586-23810136	1.80248	0.0357349	Superficial_Epithelial	Intron	23681	slit2	chr1-23808586-23810136@slit2
0.0911642	slit2	chr1-23822271-23823280	3.22144	0.000637752	Superficial_Epithelial	Intron	37366	slit2	chr1-23822271-23823280@slit2
0.0824402	slit2	chr1-23834590-23835683	2.3545	0.00927381	Superficial_Epithelial	Intron	-31195	mir218a-2	chr1-23834590-23835683@slit2
0.0986856	slit2	chr1-23873427-23874558	2.90153	0.00185671	Superficial_Epithelial	Exon	6549	mir218a-2	chr1-23873427-23874558@slit2
0.0638903	lrba	chr1-24349400-24350775	4.2959	8.69924e-06	Superficial_Epithelial	Promoter	0	im:7138144	chr1-24349400-24350775@lrba
0.0545885	lrba	chr1-24355215-24356348	2.37079	0.00887512	Superficial_Epithelial	Promoter	0	rps3a	chr1-24355215-24356348@lrba
0.06759	sh3d19	chr1-24460680-24461583	3.93793	4.10936e-05	Superficial_Epithelial	Promoter	961	sh3d19	chr1-24460680-24461583@sh3d19
0.0818177	tmem154	chr1-25141779-25144489	2.12775	0.016679	Superficial_Epithelial	Promoter	0	fbxw7	chr1-25141779-25144489@tmem154
0.0509074	fbxw7	chr1-25201262-25202457	2.0028	0.0225993	Superficial_Epithelial	Intron	-15720	tmem131l	chr1-25201262-25202457@fbxw7
0.0931077	tmem154	chr1-25173634-25174432	2.7173	0.00329087	Superficial_Epithelial	Exon	2654	tmem154	chr1-25173634-25174432@tmem154
0.0884452	tmem154	chr1-25176483-25177637	1.96506	0.0247034	Superficial_Epithelial	Promoter	0	tmem154	chr1-25176483-25177637@tmem154
0.107305	sfrp2	chr1-25518534-25519472	10.0869	3.15665e-24	Superficial_Epithelial	Intergenic	-22401	sfrp2	chr1-25518534-25519472@sfrp2
0.120375	sfrp2	chr1-25535211-25535771	24.2206	6.74208e-130	Superficial_Epithelial	Intergenic	22159	si:dkey-30k22.10	chr1-25535211-25535771@sfrp2
0.0513143	BX323448.1	chr1-26110759-26112207	4.01325	2.99446e-05	Superficial_Epithelial	Promoter	0	mtap	chr1-26110759-26112207@BX323448.1
0.057621	arhgef38	chr1-26411309-26413538	5.02977	2.45533e-07	Superficial_Epithelial	Promoter	0	arhgef38	chr1-26411309-26413538@arhgef38
0.0538147	bnc2	chr1-26959140-26959653	2.08477	0.0185452	Superficial_Epithelial	Intron	41185	cntln	chr1-26959140-26959653@bnc2
0.0622887	bnc2	chr1-26991489-26992429	1.87793	0.0301955	Superficial_Epithelial	Exon	8409	cntln	chr1-26991489-26992429@bnc2
0.123885	bnc2	chr1-27023599-27024620	2.77835	0.0027318	Superficial_Epithelial	Promoter	0	bnc2	chr1-27023599-27024620@bnc2
0.122006	bnc2	chr1-27025328-27026272	2.52323	0.00581405	Superficial_Epithelial	Intron	1260	bnc2	chr1-27025328-27026272@bnc2
0.0916496	bnc2	chr1-27027258-27027547	3.84482	6.03196e-05	Superficial_Epithelial	Intron	3190	bnc2	chr1-27027258-27027547@bnc2
0.0638737	bnc2	chr1-27039862-27040125	3.38677	0.000353597	Superficial_Epithelial	Intron	-12405	bnc2	chr1-27039862-27040125@bnc2
0.116226	bnc2	chr1-27040334-27041405	2.55366	0.0053299	Superficial_Epithelial	Intron	-11125	bnc2	chr1-27040334-27041405@bnc2
0.16842	bnc2	chr1-27045484-27046606	3.69628	0.00010939	Superficial_Epithelial	Intron	-5924	bnc2	chr1-27045484-27046606@bnc2
0.0619666	bnc2	chr1-27048727-27049018	2.12319	0.0168691	Superficial_Epithelial	Intron	-3512	bnc2	chr1-27048727-27049018@bnc2
0.0978936	bnc2	chr1-27049756-27050250	3.35334	0.000399217	Superficial_Epithelial	Intron	-2280	bnc2	chr1-27049756-27050250@bnc2
0.22861	bnc2	chr1-27052614-27054392	7.9666	8.15483e-16	Superficial_Epithelial	Promoter	0	bnc2	chr1-27052614-27054392@bnc2
0.111568	bnc2	chr1-27062265-27063254	4.88587	5.14866e-07	Superficial_Epithelial	Intron	-7506	bnc2	chr1-27062265-27063254@bnc2
0.0634605	bnc2	chr1-27063604-27064385	1.77059	0.0383145	Superficial_Epithelial	Intron	-6375	bnc2	chr1-27063604-27064385@bnc2
0.0957098	bnc2	chr1-27070563-27071267	2.42321	0.00769211	Superficial_Epithelial	Promoter	0	bnc2	chr1-27070563-27071267@bnc2
0.0525895	bnc2	chr1-27073752-27074198	2.4521	0.00710128	Superficial_Epithelial	Intron	2992	bnc2	chr1-27073752-27074198@bnc2
0.101918	bnc2	chr1-27093015-27094482	2.46713	0.00681001	Superficial_Epithelial	Intron	-17997	bnc2	chr1-27093015-27094482@bnc2
0.137106	bnc2	chr1-27095473-27096216	3.37286	0.000371963	Superficial_Epithelial	Intron	-16263	bnc2	chr1-27095473-27096216@bnc2
0.0698563	bnc2	chr1-27117224-27118377	1.68058	0.0464223	Superficial_Epithelial	Intron	4745	bnc2	chr1-27117224-27118377@bnc2
0.0503775	si:ch1073-440b2.1	chr1-28429446-28429892	4.66308	1.55759e-06	Superficial_Epithelial	Intron	43458	si:ch1073-440b2.1	chr1-28429446-28429892@si:ch1073-440b2.1
0.0532631	si:ch1073-440b2.1	chr1-28437304-28439237	3.58002	0.000171786	Superficial_Epithelial	Intron	34113	si:ch1073-440b2.1	chr1-28437304-28439237@si:ch1073-440b2.1
0.0796593	si:ch1073-440b2.1	chr1-28446917-28448116	7.30003	1.4385e-13	Superficial_Epithelial	Intron	25234	si:ch1073-440b2.1	chr1-28446917-28448116@si:ch1073-440b2.1
0.0501364	si:ch1073-440b2.1	chr1-28464575-28465678	2.88233	0.00197372	Superficial_Epithelial	Intron	7672	si:ch1073-440b2.1	chr1-28464575-28465678@si:ch1073-440b2.1
0.0574972	GK3P	chr1-28831106-28832169	3.51097	0.000223238	Superficial_Epithelial	Promoter	0	zgc:172295	chr1-28831106-28832169@GK3P
0.0838034	cbsa	chr1-29068243-29069433	5.52062	1.689e-08	Superficial_Epithelial	Promoter	0	cbsa	chr1-29068243-29069433@cbsa
0.136544	si:dkey-1h24.2	chr1-29557315-29558062	10.6805	6.28002e-27	Superficial_Epithelial	Intergenic	42155	NA	chr1-29557315-29558062@si:dkey-1h24.2
0.0798578	si:dkey-1h24.2	chr1-29658619-29659456	5.12035	1.52483e-07	Superficial_Epithelial	Promoter	0	si:dkey-1h24.6	chr1-29658619-29659456@si:dkey-1h24.2
0.0577246	si:dkey-1h24.6	chr1-29653027-29653989	5.00205	2.8362e-07	Superficial_Epithelial	Promoter	0	si:dkey-1h24.2	chr1-29653027-29653989@si:dkey-1h24.6
0.141848	si:dkey-1h24.6	chr1-29658619-29659456	10.7132	4.41051e-27	Superficial_Epithelial	Promoter	0	si:dkey-1h24.6	chr1-29658619-29659456@si:dkey-1h24.6
0.0646246	raph1b	chr1-29661756-29662422	1.81603	0.0346829	Superficial_Epithelial	Intergenic	-1914	raph1b	chr1-29661756-29662422@raph1b
0.089819	raph1b	chr1-29663948-29665535	3.31126	0.00046438	Superficial_Epithelial	Promoter	0	raph1b	chr1-29663948-29665535@raph1b
0.0515993	raph1b	chr1-29671262-29671935	2.46888	0.00677686	Superficial_Epithelial	Intron	6926	raph1b	chr1-29671262-29671935@raph1b
0.0564597	raph1b	chr1-29673240-29674259	2.01691	0.0218525	Superficial_Epithelial	Intron	8904	raph1b	chr1-29673240-29674259@raph1b
0.14696	raph1b	chr1-29682073-29682913	6.3056	1.43542e-10	Superficial_Epithelial	Intron	17737	raph1b	chr1-29682073-29682913@raph1b
0.089451	raph1b	chr1-29696911-29698108	3.22259	0.000635178	Superficial_Epithelial	Intron	32575	raph1b	chr1-29696911-29698108@raph1b
0.0729952	raph1b	chr1-29708670-29709467	2.11508	0.0172117	Superficial_Epithelial	Intron	-28955	raph1b	chr1-29708670-29709467@raph1b
0.0595172	raph1b	chr1-29714517-29715792	1.74951	0.0401014	Superficial_Epithelial	Intron	-22630	raph1b	chr1-29714517-29715792@raph1b
0.0785348	raph1b	chr1-29721528-29722547	2.77217	0.00278419	Superficial_Epithelial	Intron	-15875	raph1b	chr1-29721528-29722547@raph1b
0.0536251	spp2	chr1-29677726-29677911	6.09733	5.39269e-10	Superficial_Epithelial	Intron	13390	raph1b	chr1-29677726-29677911@spp2
0.0563358	tm9sf2	chr1-29714517-29715792	2.99942	0.00135246	Superficial_Epithelial	Intron	-22630	raph1b	chr1-29714517-29715792@tm9sf2
0.0634893	spp2	chr1-29847398-29847861	7.36592	8.79674e-14	Superficial_Epithelial	Intron	-10171	zic2b	chr1-29847398-29847861@spp2
0.060755	igf2bp2b	chr1-30435408-30436396	3.7391	9.23391e-05	Superficial_Epithelial	Intron	4664	NA	chr1-30435408-30436396@igf2bp2b
0.0686933	igf2bp2b	chr1-30436855-30437304	6.06674	6.52663e-10	Superficial_Epithelial	3' UTR	3756	NA	chr1-30436855-30437304@igf2bp2b
0.0548502	igf2bp2b	chr1-30445275-30447053	4.76771	9.31643e-07	Superficial_Epithelial	Exon	-4215	NA	chr1-30445275-30447053@igf2bp2b
0.0751788	igf2bp2b	chr1-30473008-30474120	3.44444	0.000286117	Superficial_Epithelial	Promoter	0	igf2bp2b	chr1-30473008-30474120@igf2bp2b
0.0562569	igf2bp2b	chr1-30503221-30504721	2.56707	0.00512804	Superficial_Epithelial	Intron	6118	igf2bp2b	chr1-30503221-30504721@igf2bp2b
0.114933	dachc	chr1-30626480-30627990	3.19917	0.000689114	Superficial_Epithelial	Intron	13546	dachc	chr1-30626480-30627990@dachc
0.0781843	dachc	chr1-30635213-30636206	2.73679	0.00310209	Superficial_Epithelial	Intron	5330	dachc	chr1-30635213-30636206@dachc
0.0593799	dachc	chr1-30642100-30642291	3.50832	0.000225474	Superficial_Epithelial	Promoter	-564	dachc	chr1-30642100-30642291@dachc
0.0770261	dachc	chr1-30644797-30645819	2.02024	0.021679	Superficial_Epithelial	Intron	-3261	dachc	chr1-30644797-30645819@dachc
0.0727481	dachc	chr1-30657543-30658419	2.21999	0.0132097	Superficial_Epithelial	Intron	-16007	dachc	chr1-30657543-30658419@dachc
0.0578928	dachc	chr1-30673975-30675473	1.72544	0.0422238	Superficial_Epithelial	Intron	13531	dachc	chr1-30673975-30675473@dachc
0.0721411	dachc	chr1-30680184-30681630	1.78775	0.036908	Superficial_Epithelial	Intron	7374	dachc	chr1-30680184-30681630@dachc
0.0572823	dachc	chr1-30685522-30686447	2.02264	0.0215549	Superficial_Epithelial	Intron	2557	dachc	chr1-30685522-30686447@dachc
0.0619665	dachc	chr1-30688044-30689534	1.70078	0.0444925	Superficial_Epithelial	Promoter	0	dachc	chr1-30688044-30689534@dachc
0.0998543	itga6b	chr1-30962705-30963838	2.13458	0.0163975	Superficial_Epithelial	3' UTR	6780	metap1d	chr1-30962705-30963838@itga6b
0.0934188	itga6b	chr1-30977380-30977825	2.8648	0.00208637	Superficial_Epithelial	Downstream (<1kb)	1882	dlx2b	chr1-30977380-30977825@itga6b
0.055587	dlx2b	chr1-31062436-31062710	7.08315	7.04574e-13	Superficial_Epithelial	3' UTR	5196	itga6b	chr1-31062436-31062710@dlx2b
0.0811901	itga6b	chr1-30978597-30981191	2.17428	0.0148422	Superficial_Epithelial	Promoter	0	dlx2b	chr1-30978597-30981191@itga6b
0.0870114	itga6b	chr1-30983640-30983927	1.97307	0.0242438	Superficial_Epithelial	Intergenic	-3933	dlx2b	chr1-30983640-30983927@itga6b
0.0892541	itga6b	chr1-30990425-30990981	3.18016	0.000735978	Superficial_Epithelial	Intergenic	-10718	dlx2b	chr1-30990425-30990981@itga6b
0.139755	itga6b	chr1-30993652-30995379	4.30783	8.24327e-06	Superficial_Epithelial	Intergenic	-13945	dlx2b	chr1-30993652-30995379@itga6b
0.0874896	itga6b	chr1-31016208-31017118	1.88307	0.0298456	Superficial_Epithelial	Intergenic	-2047	itga6b	chr1-31016208-31017118@itga6b
0.147943	itga6b	chr1-31018906-31019580	4.11958	1.89784e-05	Superficial_Epithelial	Promoter	0	itga6b	chr1-31018906-31019580@itga6b
0.0548852	itga6b	chr1-31052351-31052732	2.12149	0.0169404	Superficial_Epithelial	Exon	-1683	itga6b	chr1-31052351-31052732@itga6b
0.0626041	itga6b	chr1-31057775-31058226	3.06029	0.0011056	Superficial_Epithelial	Promoter	535	itga6b	chr1-31057775-31058226@itga6b
0.0744694	itga6b	chr1-31062436-31062710	2.61814	0.00442058	Superficial_Epithelial	3' UTR	5196	itga6b	chr1-31062436-31062710@itga6b
0.0613621	itga6b	chr1-31064987-31065483	1.8711	0.0306658	Superficial_Epithelial	Intergenic	7747	itga6b	chr1-31064987-31065483@itga6b
0.0734632	itga6b	chr1-31066663-31067046	2.18794	0.014337	Superficial_Epithelial	Intergenic	9423	itga6b	chr1-31066663-31067046@itga6b
0.0522868	itga6b	chr1-31068458-31069136	1.83672	0.0331256	Superficial_Epithelial	Downstream (2-3kb)	11218	itga6b	chr1-31068458-31069136@itga6b
0.0584455	itga6b	chr1-31094303-31094896	1.68621	0.0458774	Superficial_Epithelial	Intron	10480	ppp1r9alb	chr1-31094303-31094896@itga6b
0.0549911	kcnq5b	chr1-31281646-31282856	1.84256	0.0326968	Superficial_Epithelial	Intron	13390	NA	chr1-31281646-31282856@kcnq5b
0.0920933	kcnq5b	chr1-31320865-31322044	3.44315	0.000287494	Superficial_Epithelial	Intron	-24619	NA	chr1-31320865-31322044@kcnq5b
0.129658	kcnq5b	chr1-31334528-31334712	10.1035	2.66616e-24	Superficial_Epithelial	Intron	15436	kcnq5b	chr1-31334528-31334712@kcnq5b
0.0840584	kcnq5b	chr1-31336840-31338486	2.70483	0.00341693	Superficial_Epithelial	Intron	11662	kcnq5b	chr1-31336840-31338486@kcnq5b
0.0988713	kcnq5b	chr1-31345086-31345814	3.1886	0.000714819	Superficial_Epithelial	Intron	4334	kcnq5b	chr1-31345086-31345814@kcnq5b
0.101585	kcnq5b	chr1-31347605-31348178	4.87564	5.42276e-07	Superficial_Epithelial	Intron	1970	kcnq5b	chr1-31347605-31348178@kcnq5b
0.0912366	kcnq5b	chr1-31349315-31350469	3.94583	3.97613e-05	Superficial_Epithelial	Promoter	0	kcnq5b	chr1-31349315-31350469@kcnq5b
0.053714	kcnq5b	chr1-31352050-31352787	1.82908	0.0336935	Superficial_Epithelial	Intergenic	-1902	kcnq5b	chr1-31352050-31352787@kcnq5b
0.105568	kcnq5b	chr1-31353303-31353778	3.99316	3.25992e-05	Superficial_Epithelial	Intergenic	-3155	kcnq5b	chr1-31353303-31353778@kcnq5b
0.0763713	anos1a	chr1-31877974-31878380	6.61986	1.79772e-11	Superficial_Epithelial	Intergenic	13570	inab	chr1-31877974-31878380@anos1a
0.0673799	sts	chr1-32058678-32059159	6.72324	8.88648e-12	Superficial_Epithelial	Intron	4519	sts	chr1-32058678-32059159@sts
0.0513405	prkx	chr1-33233155-33234367	2.41971	0.00776644	Superficial_Epithelial	Intron	15244	prkx	chr1-33233155-33234367@prkx
0.0517408	mxra5a	chr1-33288230-33289393	1.68142	0.0463411	Superficial_Epithelial	Intergenic	-32781	mxra5a	chr1-33288230-33289393@mxra5a
0.0611781	mxra5a	chr1-33298749-33300414	2.26295	0.0118193	Superficial_Epithelial	Intergenic	-21760	mxra5a	chr1-33298749-33300414@mxra5a
0.0692863	mxra5a	chr1-33310139-33312447	3.09689	0.000977803	Superficial_Epithelial	Intergenic	-9727	mxra5a	chr1-33310139-33312447@mxra5a
0.0626535	mxra5a	chr1-33315275-33315847	3.36824	0.000378248	Superficial_Epithelial	Intergenic	-6327	mxra5a	chr1-33315275-33315847@mxra5a
0.0797849	mxra5a	chr1-33321940-33323263	3.07899	0.0010385	Superficial_Epithelial	Promoter	0	mxra5a	chr1-33321940-33323263@mxra5a
0.0602367	cd99	chr1-33347678-33348661	2.23126	0.012832	Superficial_Epithelial	Exon	3119	gyg2	chr1-33347678-33348661@cd99
0.0515463	cd99	chr1-33357741-33358841	1.83547	0.0332181	Superficial_Epithelial	Exon	-3963	gyg2	chr1-33357741-33358841@cd99
0.0597824	cd99	chr1-33379256-33380345	2.1089	0.0174765	Superficial_Epithelial	Promoter	0	cd99	chr1-33379256-33380345@cd99
0.0559121	nsun3	chr1-33658053-33658982	6.79265	5.50459e-12	Superficial_Epithelial	Exon	-9254	arl13b	chr1-33658053-33658982@nsun3
0.0639849	klf12a	chr1-34450145-34451248	3.63496	0.00013901	Superficial_Epithelial	Promoter	0	lmo7b	chr1-34450145-34451248@klf12a
0.0624153	klf12a	chr1-34496146-34497278	2.44518	0.00723897	Superficial_Epithelial	Promoter	0	klf12a	chr1-34496146-34497278@klf12a
0.124498	klf12a	chr1-34520085-34521291	5.73156	4.97544e-09	Superficial_Epithelial	Intron	-5922	klf12a	chr1-34520085-34521291@klf12a
0.0621589	klf12a	chr1-34583576-34584825	3.57222	0.000176986	Superficial_Epithelial	Intergenic	27788	klf5a	chr1-34583576-34584825@klf12a
0.0835675	frem3	chr1-35672713-35673727	3.9702	3.59064e-05	Superficial_Epithelial	Intron	-19153	frem3	chr1-35672713-35673727@frem3
0.0657639	frem3	chr1-35683308-35683945	3.02386	0.00124786	Superficial_Epithelial	Intron	11033	si:dkey-27h10.2	chr1-35683308-35683945@frem3
0.0541155	frem3	chr1-35687846-35688721	3.0817	0.0010291	Superficial_Epithelial	Intron	6257	si:dkey-27h10.2	chr1-35687846-35688721@frem3
0.0614956	si:dkey-27h10.2	chr1-35672713-35673727	6.89971	2.60541e-12	Superficial_Epithelial	Intron	-19153	frem3	chr1-35672713-35673727@si:dkey-27h10.2
0.0718258	si:dkey-27h10.2	chr1-35687846-35688721	7.32818	1.16649e-13	Superficial_Epithelial	Intron	6257	si:dkey-27h10.2	chr1-35687846-35688721@si:dkey-27h10.2
0.0583081	hhip	chr1-35715225-35715543	4.75917	9.71949e-07	Superficial_Epithelial	Intergenic	-19501	si:dkey-27h10.2	chr1-35715225-35715543@hhip
0.131679	hhip	chr1-35782892-35783356	7.84317	2.19661e-15	Superficial_Epithelial	Intergenic	-6726	hhip	chr1-35782892-35783356@hhip
0.076598	hhip	chr1-35808614-35809755	3.06741	0.00107961	Superficial_Epithelial	Intron	17722	hhip	chr1-35808614-35809755@hhip
0.0681161	hhip	chr1-35848299-35848471	3.55284	0.000190552	Superficial_Epithelial	Intergenic	-14079	LOC110438575	chr1-35848299-35848471@hhip
0.0512639	znf827	chr1-36068120-36068737	2.56125	0.00521476	Superficial_Epithelial	Intron	74823	zgc:152968	chr1-36068120-36068737@znf827
0.132034	znf827	chr1-36075905-36077028	6.20244	2.77972e-10	Superficial_Epithelial	Intron	74349	znf827	chr1-36075905-36077028@znf827
0.101439	znf827	chr1-36144483-36145417	4.15249	1.64439e-05	Superficial_Epithelial	Intron	5960	znf827	chr1-36144483-36145417@znf827
0.0765729	znf827	chr1-36149742-36151712	3.82669	6.49397e-05	Superficial_Epithelial	Promoter	0	znf827	chr1-36149742-36151712@znf827
0.062735	znf827	chr1-36193934-36195371	1.7487	0.0401714	Superficial_Epithelial	Promoter	0	lsm6	chr1-36193934-36195371@znf827
0.0638165	ednraa	chr1-36665187-36666014	4.18239	1.44231e-05	Superficial_Epithelial	Promoter	0	ednraa	chr1-36665187-36666014@ednraa
0.0605077	prmt9	chr1-36697779-36698664	6.12383	4.56773e-10	Superficial_Epithelial	Exon	23123	ednraa	chr1-36697779-36698664@prmt9
0.126114	arhgap10	chr1-36771560-36773344	3.59886	0.000159806	Superficial_Epithelial	Promoter	0	prmt9	chr1-36771560-36773344@arhgap10
0.0921575	arhgap10	chr1-36775588-36776103	3.11035	0.000934344	Superficial_Epithelial	Intron	3240	arhgap10	chr1-36775588-36776103@arhgap10
0.0676925	arhgap10	chr1-36777719-36779131	1.94127	0.0261125	Superficial_Epithelial	Intron	5371	arhgap10	chr1-36777719-36779131@arhgap10
0.0665173	arhgap10	chr1-36816086-36816591	3.02248	0.00125356	Superficial_Epithelial	Intron	43738	arhgap10	chr1-36816086-36816591@arhgap10
0.0926154	arhgap10	chr1-36818944-36819552	3.3964	0.000341389	Superficial_Epithelial	Intron	46596	arhgap10	chr1-36818944-36819552@arhgap10
0.152966	arhgap10	chr1-36823341-36824818	5.42818	2.84659e-08	Superficial_Epithelial	Exon	50993	arhgap10	chr1-36823341-36824818@arhgap10
0.0661716	tnip2	chr1-37365693-37366889	5.28975	6.12414e-08	Superficial_Epithelial	Intergenic	-1703	NA	chr1-37365693-37366889@tnip2
0.065897	tnip2	chr1-37371635-37372429	7.16407	3.91585e-13	Superficial_Epithelial	Downstream (<1kb)	5080	tnip2	chr1-37371635-37372429@tnip2
0.0573811	tnip2	chr1-37377232-37378315	5.72658	5.12372e-09	Superficial_Epithelial	Promoter	0	tnip2	chr1-37377232-37378315@tnip2
0.0539187	tnip2	chr1-37378630-37379244	4.79323	8.20593e-07	Superficial_Epithelial	3' UTR	-1121	tnip2	chr1-37378630-37379244@tnip2
0.0509793	vegfc	chr1-38870945-38872449	5.33752	4.7114e-08	Superficial_Epithelial	Intron	12546	NA	chr1-38870945-38872449@vegfc
0.0646095	vegfc	chr1-38896323-38897592	9.2224	1.45261e-20	Superficial_Epithelial	Intron	-9598	vegfc	chr1-38896323-38897592@vegfc
0.0941347	tenm3	chr1-39366676-39367545	4.96264	3.47714e-07	Superficial_Epithelial	Intergenic	6366	mir2197	chr1-39366676-39367545@tenm3
0.0540009	tenm3	chr1-39387619-39388719	2.19913	0.0139343	Superficial_Epithelial	Promoter	0	tenm3	chr1-39387619-39388719@tenm3
0.0595824	tenm3	chr1-39417566-39417752	3.76719	8.2549e-05	Superficial_Epithelial	Intron	29690	tenm3	chr1-39417566-39417752@tenm3
0.0541708	tenm3	chr1-39470233-39470774	2.7503	0.00297704	Superficial_Epithelial	Intron	-11814	tenm3	chr1-39470233-39470774@tenm3
0.056338	tenm3	chr1-39482537-39482934	3.87792	5.26774e-05	Superficial_Epithelial	Promoter	0	tenm3	chr1-39482537-39482934@tenm3
0.0509309	stox2a	chr1-39960550-39961459	2.58049	0.004933	Superficial_Epithelial	Intron	15033	stox2a	chr1-39960550-39961459@stox2a
0.0627026	maml3	chr1-40460020-40460548	5.71875	5.36558e-09	Superficial_Epithelial	Intron	-48076	maml3	chr1-40460020-40460548@maml3
0.0542331	FO834828.1	chr1-40647751-40648508	3.80121	7.19954e-05	Superficial_Epithelial	Intergenic	-15028	LOC101885779	chr1-40647751-40648508@FO834828.1
0.0598202	FO834828.1	chr1-40669025-40669585	4.32098	7.76693e-06	Superficial_Epithelial	Exon	5489	LOC101885779	chr1-40669025-40669585@FO834828.1
0.0673051	FO834828.2	chr1-40669025-40669585	5.25188	7.52759e-08	Superficial_Epithelial	Exon	5489	LOC101885779	chr1-40669025-40669585@FO834828.2
0.0798227	FO681323.1	chr1-40669025-40669585	5.0637	2.05599e-07	Superficial_Epithelial	Exon	5489	LOC101885779	chr1-40669025-40669585@FO681323.1
0.0618643	FO681323.1	chr1-40679082-40680693	4.14628	1.68959e-05	Superficial_Epithelial	Intergenic	-2798	NA	chr1-40679082-40680693@FO681323.1
0.0576462	FO834828.2	chr1-40682315-40683653	4.21922	1.22573e-05	Superficial_Epithelial	Promoter	0	NA	chr1-40682315-40683653@FO834828.2
0.0766335	FO681323.1	chr1-40682315-40683653	3.92833	4.27697e-05	Superficial_Epithelial	Promoter	0	NA	chr1-40682315-40683653@FO681323.1
0.0567256	FO834828.2	chr1-40699276-40700076	5.79211	3.47534e-09	Superficial_Epithelial	Exon	4505	NA	chr1-40699276-40700076@FO834828.2
0.0615594	FO681323.1	chr1-40685649-40686899	4.31748	7.89099e-06	Superficial_Epithelial	Intron	2158	NA	chr1-40685649-40686899@FO681323.1
0.054272	cpz	chr1-40749371-40750075	4.15814	1.60422e-05	Superficial_Epithelial	Intron	8173	htra3a	chr1-40749371-40750075@cpz
0.0585391	rgs12b	chr1-41211380-41212365	3.83985	6.15546e-05	Superficial_Epithelial	Intron	-19174	dok7	chr1-41211380-41212365@rgs12b
0.0693875	rgs12b	chr1-41244958-41245786	4.81113	7.50382e-07	Superficial_Epithelial	Intron	-5374	rgs12b	chr1-41244958-41245786@rgs12b
0.0590478	si:dkey-56e3.2	chr1-41555929-41556810	3.68082	0.000116241	Superficial_Epithelial	Intergenic	-31261	NA	chr1-41555929-41556810@si:dkey-56e3.2
0.053844	si:dkey-56e3.2	chr1-41559261-41560481	3.33945	0.000419718	Superficial_Epithelial	Intergenic	-27590	NA	chr1-41559261-41560481@si:dkey-56e3.2
0.0630411	si:dkey-56e3.2	chr1-41574980-41578712	3.72608	9.72411e-05	Superficial_Epithelial	Intergenic	-9359	NA	chr1-41574980-41578712@si:dkey-56e3.2
0.110005	si:dkey-56e3.2	chr1-41593507-41596726	6.78021	6.00017e-12	Superficial_Epithelial	Promoter	0	si:dkey-56e3.3	chr1-41593507-41596726@si:dkey-56e3.2
0.0774045	si:dkey-37g12.1	chr1-41919546-41919916	6.71307	9.52852e-12	Superficial_Epithelial	Exon	20627	si:dkey-37g12.1	chr1-41919546-41919916@si:dkey-37g12.1
0.0538554	tacr3a	chr1-43902267-43902853	5.24494	7.81674e-08	Superficial_Epithelial	3' UTR	1346	enam	chr1-43902267-43902853@tacr3a
0.074762	enam	chr1-43905072-43905854	6.80034	5.21852e-12	Superficial_Epithelial	Promoter	0	enam	chr1-43905072-43905854@enam
0.0504766	scpp7	chr1-43905072-43905854	3.9488	3.92712e-05	Superficial_Epithelial	Promoter	0	enam	chr1-43905072-43905854@scpp7
0.0828514	vwa11	chr1-44067275-44067597	4.5732	2.40168e-06	Superficial_Epithelial	Intergenic	11146	NA	chr1-44067275-44067597@vwa11
0.0580149	vwa11	chr1-44095583-44096092	4.61682	1.94831e-06	Superficial_Epithelial	Intergenic	-11512	vwa11	chr1-44095583-44096092@vwa11
0.0570526	vwa11	chr1-44097922-44098238	3.80396	7.12011e-05	Superficial_Epithelial	Intergenic	-13851	vwa11	chr1-44097922-44098238@vwa11
0.0680059	ctnnd1	chr1-44093556-44095244	3.20375	0.000678257	Superficial_Epithelial	Intergenic	-9485	vwa11	chr1-44093556-44095244@ctnnd1
0.0546885	ctnnd1	chr1-44163200-44163910	2.52409	0.00579989	Superficial_Epithelial	Intergenic	-1783	slc43a3a	chr1-44163200-44163910@ctnnd1
0.0613974	ctnnd1	chr1-44166969-44167676	3.06143	0.00110142	Superficial_Epithelial	Intergenic	-5552	slc43a3a	chr1-44166969-44167676@ctnnd1
0.0592142	ctnnd1	chr1-44173031-44175232	2.29545	0.0108538	Superficial_Epithelial	Promoter	0	ctnnd1	chr1-44173031-44175232@ctnnd1
0.0583026	ctnnd1	chr1-44176883-44178010	2.43422	0.00746186	Superficial_Epithelial	Intron	3377	ctnnd1	chr1-44176883-44178010@ctnnd1
0.0635473	ctnnd1	chr1-44182321-44183577	3.20844	0.00066729	Superficial_Epithelial	Intron	8815	ctnnd1	chr1-44182321-44183577@ctnnd1
0.0550368	ctnnd1	chr1-44189737-44190466	2.44894	0.00716384	Superficial_Epithelial	Intron	-5770	ctnnd1	chr1-44189737-44190466@ctnnd1
0.0706589	ctnnd1	chr1-44194013-44194822	3.77283	8.07035e-05	Superficial_Epithelial	Intron	-1414	ctnnd1	chr1-44194013-44194822@ctnnd1
0.0681985	ctnnd1	chr1-44198310-44198905	3.66339	0.000124447	Superficial_Epithelial	Intron	2074	ctnnd1	chr1-44198310-44198905@ctnnd1
0.0715323	zdhhc5a	chr1-44523003-44525051	4.47383	3.84151e-06	Superficial_Epithelial	Promoter	0	zdhhc5a	chr1-44523003-44525051@zdhhc5a
0.0908054	zdhhc5a	chr1-44534119-44536163	5.40759	3.19385e-08	Superficial_Epithelial	Promoter	55	NA	chr1-44534119-44536163@zdhhc5a
0.0790526	zdhhc5a	chr1-44540645-44541462	4.68712	1.38541e-06	Superficial_Epithelial	Promoter	232	zdhhc5a	chr1-44540645-44541462@zdhhc5a
0.0829752	zdhhc5a	chr1-44555457-44556296	4.91207	4.50598e-07	Superficial_Epithelial	Exon	1352	zdhhc5a	chr1-44555457-44556296@zdhhc5a
0.0600773	si:dkey-9i23.16	chr1-44845803-44846284	6.40153	7.69126e-11	Superficial_Epithelial	Intron	-6213	kdm2aa	chr1-44845803-44846284@si:dkey-9i23.16
0.0586628	rps6	chr1-45032634-45034165	2.45632	0.00701847	Superficial_Epithelial	Intron	5561	smu1b	chr1-45032634-45034165@rps6
0.0625919	zgc:111983	chr1-45099497-45100542	2.3583	0.00917931	Superficial_Epithelial	Intergenic	14303	si:ch211-151p13.8	chr1-45099497-45100542@zgc:111983
0.0514644	zgc:111983	chr1-45128727-45129656	2.46922	0.00677047	Superficial_Epithelial	Exon	7334	muc13a	chr1-45128727-45129656@zgc:111983
0.122061	zgc:111983	chr1-45171642-45173427	4.43981	4.50185e-06	Superficial_Epithelial	3' UTR	1596	NA	chr1-45171642-45173427@zgc:111983
0.073442	zgc:111983	chr1-45177080-45178720	2.90434	0.00184011	Superficial_Epithelial	Promoter	0	zgc:111983	chr1-45177080-45178720@zgc:111983
0.05285	zgc:111983	chr1-45183203-45184536	2.62078	0.00438641	Superficial_Epithelial	Intergenic	-5802	zgc:111983	chr1-45183203-45184536@zgc:111983
0.0836479	zgc:111983	chr1-45195251-45196434	3.21286	0.000657103	Superficial_Epithelial	Intergenic	17131	ddx39aa	chr1-45195251-45196434@zgc:111983
0.0689035	zgc:111983	chr1-45198749-45199275	2.71383	0.00332547	Superficial_Epithelial	Intergenic	14290	ddx39aa	chr1-45198749-45199275@zgc:111983
0.0508273	zgc:111983	chr1-45201912-45202536	2.35446	0.00927482	Superficial_Epithelial	Intergenic	11029	ddx39aa	chr1-45201912-45202536@zgc:111983
0.0917952	si:ch211-243a20.3	chr1-45272208-45272403	5.88291	2.01564e-09	Superficial_Epithelial	Intron	41473	LOC110439861	chr1-45272208-45272403@si:ch211-243a20.3
0.0571805	pkn1a	chr1-45804686-45806031	4.39578	5.51887e-06	Superficial_Epithelial	Exon	20800	pkn1a	chr1-45804686-45806031@pkn1a
0.0585493	pnpla6	chr1-45917110-45918194	5.39026	3.5177e-08	Superficial_Epithelial	Intron	2438	pnpla6	chr1-45917110-45918194@pnpla6
0.0508389	AL929216.1	chr1-46056715-46057168	4.4653	3.99791e-06	Superficial_Epithelial	Intron	3288	NA	chr1-46056715-46057168@AL929216.1
0.0551496	atp11a	chr1-46376254-46377135	3.27179	0.000534338	Superficial_Epithelial	Intron	-23477	NA	chr1-46376254-46377135@atp11a
0.0651674	mcf2la	chr1-46493412-46494278	3.70117	0.000107304	Superficial_Epithelial	Promoter	0	mcf2la	chr1-46493412-46494278@mcf2la
0.0603351	mcf2la	chr1-46495374-46495862	3.32792	0.000437493	Superficial_Epithelial	Intron	1430	mcf2la	chr1-46495374-46495862@mcf2la
0.105553	mcf2la	chr1-46497878-46498380	6.63973	1.57125e-11	Superficial_Epithelial	Intron	3934	mcf2la	chr1-46497878-46498380@mcf2la
0.0657058	tmprss3b	chr1-46950525-46951229	5.25252	7.50157e-08	Superficial_Epithelial	Intron	2515	NA	chr1-46950525-46951229@tmprss3b
0.0531805	mhc1zea	chr1-47123469-47124164	4.83356	6.70556e-07	Superficial_Epithelial	Downstream (1-2kb)	-1328	mhc1zea	chr1-47123469-47124164@mhc1zea
0.061624	mhc1zba	chr1-47154303-47155558	3.01045	0.00130431	Superficial_Epithelial	3' UTR	-2513	mhc1zca	chr1-47154303-47155558@mhc1zba
0.0712229	mhc1zba	chr1-47168054-47168825	3.57169	0.00017734	Superficial_Epithelial	Exon	2066	cbr1	chr1-47168054-47168825@mhc1zba
0.0670764	morc3b	chr1-47218058-47218389	13.2487	2.29538e-40	Superficial_Epithelial	Intergenic	39506	morc3b	chr1-47218058-47218389@morc3b
0.0785948	morc3b	chr1-47246506-47247514	11.1073	5.77937e-29	Superficial_Epithelial	Intergenic	67954	morc3b	chr1-47246506-47247514@morc3b
0.0932377	fstl1a	chr1-47460601-47461718	3.50872	0.000225132	Superficial_Epithelial	Promoter	878	fstl1a	chr1-47460601-47461718@fstl1a
0.0635359	fstl1a	chr1-47466022-47466708	2.52818	0.00573282	Superficial_Epithelial	Intron	6299	fstl1a	chr1-47466022-47466708@fstl1a
0.0526194	sh3pxd2aa	chr1-47567810-47568499	3.31518	0.000457927	Superficial_Epithelial	Intergenic	-17201	sh3pxd2aa	chr1-47567810-47568499@sh3pxd2aa
0.0545309	sh3pxd2aa	chr1-47569794-47570140	3.52991	0.000207849	Superficial_Epithelial	Intergenic	-15560	sh3pxd2aa	chr1-47569794-47570140@sh3pxd2aa
0.081357	sh3pxd2aa	chr1-47594220-47594629	5.83814	2.63936e-09	Superficial_Epithelial	Intron	8519	sh3pxd2aa	chr1-47594220-47594629@sh3pxd2aa
0.0631536	sh3pxd2aa	chr1-47612019-47613010	4.39808	5.46072e-06	Superficial_Epithelial	Intron	26318	sh3pxd2aa	chr1-47612019-47613010@sh3pxd2aa
0.0819153	neurl1aa	chr1-47770795-47772042	3.88295	5.15977e-05	Superficial_Epithelial	Promoter	0	neurl1aa	chr1-47770795-47772042@neurl1aa
0.0543353	neurl1aa	chr1-47808597-47809850	1.69158	0.0453628	Superficial_Epithelial	Intergenic	-21769	cfap58	chr1-47808597-47809850@neurl1aa
0.0725125	neurl1aa	chr1-47829874-47830357	4.07959	2.25578e-05	Superficial_Epithelial	Intergenic	-1262	cfap58	chr1-47829874-47830357@neurl1aa
0.0680427	cfap58	chr1-47820316-47821096	7.74804	4.66621e-15	Superficial_Epithelial	Intergenic	-10523	cfap58	chr1-47820316-47821096@cfap58
0.136618	cxcl18b	chr1-49220681-49221952	4.5467	2.72462e-06	Superficial_Epithelial	Downstream (<1kb)	3938	cxcl18b	chr1-49220681-49221952@cxcl18b
0.0619849	cxcl18b	chr1-49222491-49222876	3.40097	0.000335732	Superficial_Epithelial	3' UTR	3014	cxcl18b	chr1-49222491-49222876@cxcl18b
0.161822	cxcl18b	chr1-49225388-49226320	5.35813	4.20441e-08	Superficial_Epithelial	Promoter	0	cxcl18b	chr1-49225388-49226320@cxcl18b
0.0686894	caly	chr1-49225388-49226320	3.07247	0.00106147	Superficial_Epithelial	Promoter	0	cxcl18b	chr1-49225388-49226320@caly
0.0942743	cxcl18b	chr1-49229985-49230618	3.1586	0.000792633	Superficial_Epithelial	Intergenic	-4095	cxcl18b	chr1-49229985-49230618@cxcl18b
0.0636336	cxcl18b	chr1-49246753-49247446	1.75345	0.0397626	Superficial_Epithelial	Intron	3044	si:ch73-6k14.2	chr1-49246753-49247446@cxcl18b
0.135074	cxcl18b	chr1-49252054-49253626	5.85765	2.3473e-09	Superficial_Epithelial	Intergenic	-1564	si:ch73-6k14.2	chr1-49252054-49253626@cxcl18b
0.0925396	cxcl18b	chr1-49255342-49255984	3.45134	0.000278906	Superficial_Epithelial	Intergenic	-4852	si:ch73-6k14.2	chr1-49255342-49255984@cxcl18b
0.074011	cxcl18b	chr1-49273947-49274840	2.24633	0.0123415	Superficial_Epithelial	Intron	7061	caly	chr1-49273947-49274840@cxcl18b
0.0840784	cxcl18b	chr1-49287447-49288538	2.71276	0.00333623	Superficial_Epithelial	Exon	20561	caly	chr1-49287447-49288538@cxcl18b
0.0721857	cxcl18b	chr1-49288899-49289787	2.50756	0.00607832	Superficial_Epithelial	Exon	22013	caly	chr1-49288899-49289787@cxcl18b
0.0644644	cxcl18b	chr1-49290350-49290677	3.10345	0.000956384	Superficial_Epithelial	Intron	23464	caly	chr1-49290350-49290677@cxcl18b
0.0569716	caly	chr1-49252054-49253626	2.99736	0.00136163	Superficial_Epithelial	Intergenic	-1564	si:ch73-6k14.2	chr1-49252054-49253626@caly
0.0582234	caly	chr1-49270382-49270999	2.77931	0.00272369	Superficial_Epithelial	Intron	3496	caly	chr1-49270382-49270999@caly
0.0911967	caly	chr1-49273947-49274840	5.50761	1.81865e-08	Superficial_Epithelial	Intron	7061	caly	chr1-49273947-49274840@caly
0.102375	caly	chr1-49288899-49289787	5.61033	1.00971e-08	Superficial_Epithelial	Exon	22013	caly	chr1-49288899-49289787@caly
0.0504602	msx1b	chr1-49270382-49270999	4.01908	2.92128e-05	Superficial_Epithelial	Intron	3496	caly	chr1-49270382-49270999@msx1b
0.0629316	gsk3bb	chr1-49399789-49400368	4.62781	1.84775e-06	Superficial_Epithelial	Intron	9181	gsk3bb	chr1-49399789-49400368@gsk3bb
0.0844587	gsk3bb	chr1-49403622-49405101	5.25773	7.29205e-08	Superficial_Epithelial	Intron	4448	gsk3bb	chr1-49403622-49405101@gsk3bb
0.0601569	zgc:175214	chr1-49403622-49405101	1.84161	0.0327658	Superficial_Epithelial	Intron	4448	gsk3bb	chr1-49403622-49405101@zgc:175214
0.0571083	gsk3bb	chr1-49411802-49412770	3.59407	0.000162779	Superficial_Epithelial	Intergenic	-2253	gsk3bb	chr1-49411802-49412770@gsk3bb
0.059131	gsk3bb	chr1-49491918-49492726	4.4998	3.40088e-06	Superficial_Epithelial	Exon	-2052	zgc:175214	chr1-49491918-49492726@gsk3bb
0.0593883	gsk3bb	chr1-49497084-49498820	3.79026	7.5244e-05	Superficial_Epithelial	Promoter	0	zgc:175214	chr1-49497084-49498820@gsk3bb
0.071367	zgc:175214	chr1-49483319-49484212	2.57387	0.00502842	Superficial_Epithelial	3' UTR	5654	zgc:175214	chr1-49483319-49484212@zgc:175214
0.0874311	zgc:175214	chr1-49485043-49485964	3.61023	0.000152963	Superficial_Epithelial	Exon	3902	zgc:175214	chr1-49485043-49485964@zgc:175214
0.0520474	zp3c	chr1-49486147-49486567	3.47603	0.00025445	Superficial_Epithelial	Intron	3299	zgc:175214	chr1-49486147-49486567@zp3c
0.0958391	zgc:175214	chr1-49491918-49492726	4.50797	3.27258e-06	Superficial_Epithelial	Exon	-2052	zgc:175214	chr1-49491918-49492726@zgc:175214
0.112	zgc:175214	chr1-49497084-49498820	4.46348	4.03197e-06	Superficial_Epithelial	Promoter	0	zgc:175214	chr1-49497084-49498820@zgc:175214
0.0574582	zgc:175214	chr1-49502071-49502387	2.20159	0.013847	Superficial_Epithelial	Intron	3062	calhm1	chr1-49502071-49502387@zgc:175214
0.0547462	si:ch211-281g13.4	chr1-49557906-49558676	5.27336	6.69728e-08	Superficial_Epithelial	Promoter	0	herc5.2	chr1-49557906-49558676@si:ch211-281g13.4
0.0505362	col17a1a	chr1-49567037-49567622	3.4608	0.000269289	Superficial_Epithelial	Promoter	-713	col17a1a	chr1-49567037-49567622@col17a1a
0.060817	col17a1a	chr1-49574664-49575260	4.36251	6.42907e-06	Superficial_Epithelial	Exon	6329	col17a1a	chr1-49574664-49575260@col17a1a
0.052096	si:ch211-149l1.2	chr1-49699142-49699943	5.53364	1.56826e-08	Superficial_Epithelial	Promoter	0	NA	chr1-49699142-49699943@si:ch211-149l1.2
0.0680013	lef1	chr1-49724244-49724955	2.12149	0.0169402	Superficial_Epithelial	Intergenic	24341	NA	chr1-49724244-49724955@lef1
0.0584778	lef1	chr1-49727111-49727882	2.10976	0.0174394	Superficial_Epithelial	Intergenic	27208	NA	chr1-49727111-49727882@lef1
0.0640954	lef1	chr1-49742513-49743181	2.28864	0.0110501	Superficial_Epithelial	Intergenic	42610	NA	chr1-49742513-49743181@lef1
0.073456	lef1	chr1-49748923-49749839	2.52949	0.00571137	Superficial_Epithelial	Intergenic	49020	NA	chr1-49748923-49749839@lef1
0.0672806	lef1	chr1-49764253-49764767	4.13899	1.74423e-05	Superficial_Epithelial	Intergenic	41051	NA	chr1-49764253-49764767@lef1
0.112934	lef1	chr1-49803363-49804377	5.29663	5.89805e-08	Superficial_Epithelial	Downstream (1-2kb)	1441	NA	chr1-49803363-49804377@lef1
0.0662434	lef1	chr1-49811538-49812891	2.08944	0.0183342	Superficial_Epithelial	Intergenic	-1570	lef1	chr1-49811538-49812891@lef1
0.092625	lef1	chr1-49814237-49815285	4.12297	1.87005e-05	Superficial_Epithelial	Promoter	0	lef1	chr1-49814237-49815285@lef1
0.065763	lef1	chr1-49821711-49822104	3.73741	9.29615e-05	Superficial_Epithelial	Intron	6769	lef1	chr1-49821711-49822104@lef1
0.054499	lef1	chr1-49855352-49856024	1.66245	0.0482111	Superficial_Epithelial	Intron	-21976	lef1	chr1-49855352-49856024@lef1
0.0939025	lef1	chr1-49868858-49869728	3.54202	0.000198535	Superficial_Epithelial	Exon	-8272	lef1	chr1-49868858-49869728@lef1
0.0550927	lef1	chr1-49879918-49881133	1.84201	0.0327365	Superficial_Epithelial	Exon	1918	lef1	chr1-49879918-49881133@lef1
0.131636	lef1	chr1-49892099-49893161	4.52477	3.02313e-06	Superficial_Epithelial	Intron	14099	lef1	chr1-49892099-49893161@lef1
0.0767933	lef1	chr1-49904559-49905884	3.45915	0.000270937	Superficial_Epithelial	3' UTR	9712	hadh	chr1-49904559-49905884@lef1
0.0923803	npnta	chr1-49992655-49994395	2.83652	0.00228043	Superficial_Epithelial	Intron	36786	gstcd	chr1-49992655-49994395@npnta
0.0702791	npnta	chr1-50005662-50006547	2.27447	0.011469	Superficial_Epithelial	Intron	49793	gstcd	chr1-50005662-50006547@npnta
0.0931809	npnta	chr1-50008885-50009848	3.39683	0.000340851	Superficial_Epithelial	Intron	53016	gstcd	chr1-50008885-50009848@npnta
0.0783595	npnta	chr1-50014172-50014614	5.35967	4.16866e-08	Superficial_Epithelial	Intron	58303	gstcd	chr1-50014172-50014614@npnta
0.0686998	npnta	chr1-50085297-50086164	1.76675	0.0386349	Superficial_Epithelial	Promoter	0	npnta	chr1-50085297-50086164@npnta
0.0563061	npnta	chr1-50089310-50089761	1.80112	0.0358423	Superficial_Epithelial	Intron	3670	npnta	chr1-50089310-50089761@npnta
0.118151	npnta	chr1-50092867-50094054	4.11615	1.92626e-05	Superficial_Epithelial	Intron	7227	npnta	chr1-50092867-50094054@npnta
0.0546362	npnta	chr1-50109738-50110541	2.38316	0.0085823	Superficial_Epithelial	Intron	-20617	npnta	chr1-50109738-50110541@npnta
0.093708	npnta	chr1-50160771-50161790	3.44992	0.000280374	Superficial_Epithelial	Intron	6002	NA	chr1-50160771-50161790@npnta
0.0584088	npnta	chr1-50164281-50165101	1.72845	0.041954	Superficial_Epithelial	Exon	2691	NA	chr1-50164281-50165101@npnta
0.0864113	npnta	chr1-50176673-50177599	4.2386	1.12458e-05	Superficial_Epithelial	Intron	-8881	NA	chr1-50176673-50177599@npnta
0.0534276	npnta	chr1-50182266-50183382	1.68051	0.0464287	Superficial_Epithelial	Intron	-14474	NA	chr1-50182266-50183382@npnta
0.0556346	pkd2	chr1-50510597-50511249	3.60458	0.000156331	Superficial_Epithelial	Intron	16715	papss1	chr1-50510597-50511249@pkd2
0.0766792	pkd2	chr1-50533854-50535220	3.71491	0.000101639	Superficial_Epithelial	Intergenic	-3619	pkd2	chr1-50533854-50535220@pkd2
0.0580754	si:ch73-190m4.1	chr1-50613665-50614625	4.4226	4.87606e-06	Superficial_Epithelial	Promoter	0	herc5.1	chr1-50613665-50614625@si:ch73-190m4.1
0.0797576	CABZ01031868.1	chr1-50733083-50733577	3.7289	9.61582e-05	Superficial_Epithelial	Intergenic	-22615	NA	chr1-50733083-50733577@CABZ01031868.1
0.0601109	CABZ01031868.1	chr1-50784435-50785221	2.10723	0.0175488	Superficial_Epithelial	Exon	6059	NA	chr1-50784435-50785221@CABZ01031868.1
0.0665947	CABZ01031870.1	chr1-50790616-50791623	2.87912	0.00199391	Superficial_Epithelial	Promoter	0	NA	chr1-50790616-50791623@CABZ01031870.1
0.0977455	srd5a2a	chr1-50982012-50982877	2.56545	0.00515206	Superficial_Epithelial	Intron	4458	mdh1aa	chr1-50982012-50982877@srd5a2a
0.117879	srd5a2a	chr1-51065745-51067108	3.68001	0.000116612	Superficial_Epithelial	Promoter	0	srd5a2a	chr1-51065745-51067108@srd5a2a
0.0780419	jag1a	chr1-51065745-51067108	1.86211	0.0312936	Superficial_Epithelial	Promoter	0	srd5a2a	chr1-51065745-51067108@jag1a
0.0992942	srd5a2a	chr1-51073022-51074105	2.12655	0.0167287	Superficial_Epithelial	3' UTR	6206	srd5a2a	chr1-51073022-51074105@srd5a2a
0.0949949	srd5a2a	chr1-51074516-51075623	2.02243	0.0215657	Superficial_Epithelial	Intergenic	7700	srd5a2a	chr1-51074516-51075623@srd5a2a
0.196639	srd5a2a	chr1-51085614-51087558	5.85552	2.37762e-09	Superficial_Epithelial	Intergenic	18798	srd5a2a	chr1-51085614-51087558@srd5a2a
0.125482	srd5a2a	chr1-51089657-51090130	3.83946	6.16531e-05	Superficial_Epithelial	Intergenic	22841	srd5a2a	chr1-51089657-51090130@srd5a2a
0.140325	srd5a2a	chr1-51095917-51096862	3.75899	8.53012e-05	Superficial_Epithelial	Intergenic	29101	srd5a2a	chr1-51095917-51096862@srd5a2a
0.101226	srd5a2a	chr1-51099717-51100979	2.10933	0.0174578	Superficial_Epithelial	Intergenic	32901	srd5a2a	chr1-51099717-51100979@srd5a2a
0.0767549	srd5a2a	chr1-51118702-51119764	2.23622	0.0126688	Superficial_Epithelial	Exon	37690	jag1a	chr1-51118702-51119764@srd5a2a
0.0743752	srd5a2a	chr1-51140423-51141314	1.79909	0.0360025	Superficial_Epithelial	Exon	16140	jag1a	chr1-51140423-51141314@srd5a2a
0.109284	srd5a2a	chr1-51143347-51144476	2.13024	0.0165761	Superficial_Epithelial	Exon	12978	jag1a	chr1-51143347-51144476@srd5a2a
0.0752041	srd5a2a	chr1-51155623-51156438	1.77929	0.0375961	Superficial_Epithelial	Exon	1016	jag1a	chr1-51155623-51156438@srd5a2a
0.106948	srd5a2a	chr1-51157288-51157966	3.61059	0.00015275	Superficial_Epithelial	Promoter	0	jag1a	chr1-51157288-51157966@srd5a2a
0.139904	srd5a2a	chr1-51160068-51160687	4.59113	2.20425e-06	Superficial_Epithelial	Intergenic	-2408	jag1a	chr1-51160068-51160687@srd5a2a
0.267302	jag1a	chr1-51085614-51087558	5.5486	1.43986e-08	Superficial_Epithelial	Intergenic	18798	srd5a2a	chr1-51085614-51087558@jag1a
0.170627	jag1a	chr1-51089657-51090130	3.7821	7.77543e-05	Superficial_Epithelial	Intergenic	22841	srd5a2a	chr1-51089657-51090130@jag1a
0.143917	jag1a	chr1-51095917-51096862	2.46465	0.00685736	Superficial_Epithelial	Intergenic	29101	srd5a2a	chr1-51095917-51096862@jag1a
0.0690676	jag1a	chr1-51116914-51117203	1.92044	0.0274015	Superficial_Epithelial	Intron	40251	jag1a	chr1-51116914-51117203@jag1a
0.123705	jag1a	chr1-51118702-51119764	2.33541	0.009761	Superficial_Epithelial	Exon	37690	jag1a	chr1-51118702-51119764@jag1a
0.090474	jag1a	chr1-51123035-51123728	2.85775	0.00213327	Superficial_Epithelial	Intron	33726	jag1a	chr1-51123035-51123728@jag1a
0.0651326	jag1a	chr1-51127314-51127858	1.69342	0.0451877	Superficial_Epithelial	Exon	29596	jag1a	chr1-51127314-51127858@jag1a
0.0625852	jag1a	chr1-51130442-51131214	1.83869	0.0329802	Superficial_Epithelial	Exon	26240	jag1a	chr1-51130442-51131214@jag1a
0.124102	jag1a	chr1-51140423-51141314	2.14976	0.0157872	Superficial_Epithelial	Exon	16140	jag1a	chr1-51140423-51141314@jag1a
0.117005	jag1a	chr1-51150109-51151322	1.99988	0.0227568	Superficial_Epithelial	Intron	6132	jag1a	chr1-51150109-51151322@jag1a
0.104349	jag1a	chr1-51155623-51156438	2.0149	0.0219577	Superficial_Epithelial	Exon	1016	jag1a	chr1-51155623-51156438@jag1a
0.132446	jag1a	chr1-51157288-51157966	3.19887	0.000689836	Superficial_Epithelial	Promoter	0	jag1a	chr1-51157288-51157966@jag1a
0.154771	jag1a	chr1-51160068-51160687	3.11561	0.000917818	Superficial_Epithelial	Intergenic	-2408	jag1a	chr1-51160068-51160687@jag1a
0.0745	jag1a	chr1-51162303-51162658	2.91363	0.00178625	Superficial_Epithelial	Intergenic	-4643	jag1a	chr1-51162303-51162658@jag1a
0.0505953	jag1a	chr1-51179952-51180236	2.71678	0.00329605	Superficial_Epithelial	Intergenic	-10813	btbd3a	chr1-51179952-51180236@jag1a
0.0555003	ppp3r1b	chr1-51499199-51500137	3.36984	0.000376053	Superficial_Epithelial	Intron	2337	meis1a	chr1-51499199-51500137@ppp3r1b
0.0630333	prdx2	chr1-51781178-51782171	3.45802	0.000272081	Superficial_Epithelial	Intron	21433	NA	chr1-51781178-51782171@prdx2
0.0558025	junba	chr1-51731059-51732049	6.62125	1.78084e-11	Superficial_Epithelial	Downstream (<1kb)	2475	junba	chr1-51731059-51732049@junba
-0.0536631	si:ch211-217k17.8	chr1-52298126-52299002	-3.32826	0.000436947	Superficial_Epithelial	Intergenic	-5891	si:dkey-121b10.7	chr1-52298126-52299002@si:ch211-217k17.8
-0.0802399	si:ch211-217k17.9	chr1-52298126-52299002	-4.44775	4.3387e-06	Superficial_Epithelial	Intergenic	-5891	si:dkey-121b10.7	chr1-52298126-52299002@si:ch211-217k17.9
0.067222	LO017718.1	chr1-52317364-52319134	7.33793	1.08462e-13	Superficial_Epithelial	Intergenic	-25129	si:dkey-121b10.7	chr1-52317364-52319134@LO017718.1
-0.0538861	si:ch211-217k17.9	chr1-52317364-52319134	-2.88553	0.00195377	Superficial_Epithelial	Intergenic	-25129	si:dkey-121b10.7	chr1-52317364-52319134@si:ch211-217k17.9
-0.0550468	si:ch211-217k17.9	chr1-52320847-52321581	-3.33733	0.000422945	Superficial_Epithelial	Intergenic	-28612	si:dkey-121b10.7	chr1-52320847-52321581@si:ch211-217k17.9
0.0640769	LO017718.1	chr1-52327694-52328285	6.25711	1.96085e-10	Superficial_Epithelial	Intergenic	-24877	NA	chr1-52327694-52328285@LO017718.1
0.0519552	si:ch211-217k17.8	chr1-52390833-52392524	3.47434	0.000256059	Superficial_Epithelial	Promoter	0	NA	chr1-52390833-52392524@si:ch211-217k17.8
0.181653	si:ch211-217k17.8	chr1-52400488-52403111	11.2774	8.48081e-30	Superficial_Epithelial	3' UTR	1746	NA	chr1-52400488-52403111@si:ch211-217k17.8
0.201228	si:ch211-217k17.9	chr1-52400488-52403111	10.3363	2.41536e-25	Superficial_Epithelial	3' UTR	1746	NA	chr1-52400488-52403111@si:ch211-217k17.9
0.0664762	si:ch211-217k17.9	chr1-52443046-52444107	3.75661	8.61143e-05	Superficial_Epithelial	Promoter	0	si:ch211-217k17.11	chr1-52443046-52444107@si:ch211-217k17.9
0.0601378	si:ch211-217k17.10	chr1-52400488-52403111	4.4178	4.98546e-06	Superficial_Epithelial	3' UTR	1746	NA	chr1-52400488-52403111@si:ch211-217k17.10
0.0558454	si:ch211-217k17.10	chr1-52414767-52415620	4.08612	2.19328e-05	Superficial_Epithelial	Intergenic	15600	zgc:194101	chr1-52414767-52415620@si:ch211-217k17.10
0.0568854	zgc:194101	chr1-52428261-52428643	6.35475	1.04384e-10	Superficial_Epithelial	Downstream (1-2kb)	2577	zgc:194101	chr1-52428261-52428643@zgc:194101
0.0545677	zgc:194101	chr1-52431025-52431288	5.29345	6.00145e-08	Superficial_Epithelial	Promoter	0	zgc:194101	chr1-52431025-52431288@zgc:194101
0.0814088	zgc:194101	chr1-52434909-52435413	8.03703	4.60223e-16	Superficial_Epithelial	Intron	1643	si:ch211-217k17.12	chr1-52434909-52435413@zgc:194101
0.052995	zgc:194101	chr1-52443046-52444107	4.84557	6.31258e-07	Superficial_Epithelial	Promoter	0	si:ch211-217k17.11	chr1-52443046-52444107@zgc:194101
0.0594598	zgc:194101	chr1-52451344-52452491	4.47298	3.85677e-06	Superficial_Epithelial	3' UTR	-3980	si:ch211-217k17.10	chr1-52451344-52452491@zgc:194101
0.0552117	si:ch211-217k17.12	chr1-52434909-52435413	5.53287	1.57518e-08	Superficial_Epithelial	Intron	1643	si:ch211-217k17.12	chr1-52434909-52435413@si:ch211-217k17.12
0.0827033	si:ch211-217k17.10	chr1-52434909-52435413	5.33703	4.7241e-08	Superficial_Epithelial	Intron	1643	si:ch211-217k17.12	chr1-52434909-52435413@si:ch211-217k17.10
0.106084	si:ch211-217k17.10	chr1-52443046-52444107	7.38135	7.83452e-14	Superficial_Epithelial	Promoter	0	si:ch211-217k17.11	chr1-52443046-52444107@si:ch211-217k17.10
0.0717957	si:ch211-217k17.10	chr1-52444838-52445233	5.66687	7.27137e-09	Superficial_Epithelial	Downstream (<1kb)	-1459	si:ch211-217k17.11	chr1-52444838-52445233@si:ch211-217k17.10
0.0787354	si:ch211-217k17.10	chr1-52446790-52447634	5.87851	2.06988e-09	Superficial_Epithelial	Promoter	0	si:ch211-217k17.10	chr1-52446790-52447634@si:ch211-217k17.10
0.0920474	si:ch211-217k17.10	chr1-52451344-52452491	5.207	9.59576e-08	Superficial_Epithelial	3' UTR	-3980	si:ch211-217k17.10	chr1-52451344-52452491@si:ch211-217k17.10
0.0630845	abca1a	chr1-52460665-52462859	1.95833	0.0250958	Superficial_Epithelial	Promoter	0	glb1	chr1-52460665-52462859@abca1a
0.0561575	abca1a	chr1-52480914-52483110	1.73705	0.0411888	Superficial_Epithelial	Promoter	0	cldnd1b	chr1-52480914-52483110@abca1a
0.057837	abca1a	chr1-52538777-52539729	1.96255	0.0248494	Superficial_Epithelial	Intergenic	20601	tacr3l	chr1-52538777-52539729@abca1a
0.0649032	abca1a	chr1-52550815-52552703	2.11683	0.0171371	Superficial_Epithelial	Intergenic	-7846	abca1a	chr1-52550815-52552703@abca1a
0.0809734	abca1a	chr1-52560092-52561863	2.7299	0.00316765	Superficial_Epithelial	Promoter	0	abca1a	chr1-52560092-52561863@abca1a
0.103552	abca1a	chr1-52562491-52563316	4.35607	6.62088e-06	Superficial_Epithelial	Promoter	0	abca1a	chr1-52562491-52563316@abca1a
0.0687827	abca1a	chr1-52572526-52573786	2.1958	0.0140533	Superficial_Epithelial	Intron	9228	abca1a	chr1-52572526-52573786@abca1a
0.0591469	abca1a	chr1-52599449-52600488	2.57979	0.00494304	Superficial_Epithelial	Exon	-32368	slc44a1a	chr1-52599449-52600488@abca1a
0.0647102	abca1a	chr1-52604928-52606861	2.39342	0.00834615	Superficial_Epithelial	Exon	-25995	slc44a1a	chr1-52604928-52606861@abca1a
0.0510096	abca1a	chr1-52621838-52622432	2.1705	0.0149845	Superficial_Epithelial	Exon	-10424	slc44a1a	chr1-52621838-52622432@abca1a
0.089137	abca1a	chr1-52629645-52630432	4.49789	3.43161e-06	Superficial_Epithelial	Intergenic	-2424	slc44a1a	chr1-52629645-52630432@abca1a
0.0638678	abca1a	chr1-52632369-52634174	2.42803	0.00759065	Superficial_Epithelial	Promoter	0	slc44a1a	chr1-52632369-52634174@abca1a
0.101529	inpp4b	chr1-52999559-53000875	3.56937	0.00017892	Superficial_Epithelial	Promoter	0	inpp4b	chr1-52999559-53000875@inpp4b
0.0943598	inpp4b	chr1-53007278-53008628	5.09299	1.76233e-07	Superficial_Epithelial	Promoter	0	inpp4b	chr1-53007278-53008628@inpp4b
0.0539313	cct4	chr1-53755871-53757070	3.98045	3.43928e-05	Superficial_Epithelial	Promoter	0	akt3b	chr1-53755871-53757070@cct4
0.0645069	capn9	chr1-53901100-53902054	3.38344	0.000357922	Superficial_Epithelial	Intron	5038	capn9	chr1-53901100-53902054@capn9
0.114531	pkd1a	chr1-54361167-54362307	8.53546	6.98011e-18	Superficial_Epithelial	Intron	57826	NA	chr1-54361167-54362307@pkd1a
0.0546622	pkd1a	chr1-54396380-54396566	3.97875	3.4639e-05	Superficial_Epithelial	Intron	23567	NA	chr1-54396380-54396566@pkd1a
0.0558733	pkd1a	chr1-54424856-54426113	3.02335	0.00124995	Superficial_Epithelial	Promoter	0	pkd1a	chr1-54424856-54426113@pkd1a
0.0563711	pkd1a	chr1-54469638-54470563	3.51292	0.000221605	Superficial_Epithelial	Intergenic	-43847	pkd1a	chr1-54469638-54470563@pkd1a
0.0686603	si:ch211-197k17.3	chr1-54755778-54756635	6.11772	4.74631e-10	Superficial_Epithelial	Downstream (1-2kb)	8627	si:ch211-197k17.3	chr1-54755778-54756635@si:ch211-197k17.3
0.0617375	si:ch211-197k17.3	chr1-54758564-54759193	6.13265	4.32148e-10	Superficial_Epithelial	3' UTR	6069	si:ch211-197k17.3	chr1-54758564-54759193@si:ch211-197k17.3
0.0623066	peli1a	chr1-55052557-55054122	6.66682	1.30699e-11	Superficial_Epithelial	Intron	4673	peli1a	chr1-55052557-55054122@peli1a
0.0521396	mb	chr1-55168480-55168725	4.6368	1.76922e-06	Superficial_Epithelial	Downstream (<1kb)	-1869	pane1	chr1-55168480-55168725@mb
0.0985506	adgre10	chr1-55743245-55745589	11.5387	4.2102e-31	Superficial_Epithelial	3' UTR	3619	dnajb1b	chr1-55743245-55745589@adgre10
0.194352	dnajb1b	chr1-55743245-55745589	12.6654	4.59676e-37	Superficial_Epithelial	3' UTR	3619	dnajb1b	chr1-55743245-55745589@dnajb1b
0.0572202	gcgrb	chr1-56352284-56352491	9.23435	1.2993e-20	Superficial_Epithelial	Intron	10617	gcgrb	chr1-56352284-56352491@gcgrb
0.0564658	zgc:171452	chr1-56446493-56447642	5.89124	1.91656e-09	Superficial_Epithelial	Promoter	0	LOC100334305	chr1-56446493-56447642@zgc:171452
0.0575167	CABZ01059392.1	chr1-56464897-56466132	6.31836	1.32173e-10	Superficial_Epithelial	Intron	1403	zgc:171452	chr1-56464897-56466132@CABZ01059392.1
0.0625772	zgc:171452	chr1-56463247-56463498	6.77359	6.28124e-12	Superficial_Epithelial	Promoter	0	zgc:171452	chr1-56463247-56463498@zgc:171452
0.0861496	zgc:171452	chr1-56464897-56466132	9.10937	4.14318e-20	Superficial_Epithelial	Intron	1403	zgc:171452	chr1-56464897-56466132@zgc:171452
0.0505806	LO018605.1	chr1-56617819-56618177	5.41544	3.05688e-08	Superficial_Epithelial	Intergenic	-21118	NA	chr1-56617819-56618177@LO018605.1
0.0527316	LO018605.2	chr1-56711504-56712089	3.69208	0.000111216	Superficial_Epithelial	Downstream (2-3kb)	5724	NA	chr1-56711504-56712089@LO018605.2
0.054576	LO018605.3	chr1-56666573-56667443	3.37263	0.000372276	Superficial_Epithelial	Intergenic	-20841	NA	chr1-56666573-56667443@LO018605.3
0.0897532	LO018605.3	chr1-56673264-56674381	5.71387	5.52175e-09	Superficial_Epithelial	Intron	18989	NA	chr1-56673264-56674381@LO018605.3
0.0560613	LO018605.3	chr1-56674704-56675191	4.73333	1.10433e-06	Superficial_Epithelial	Intron	18179	NA	chr1-56674704-56675191@LO018605.3
0.0699181	LO018605.3	chr1-56687387-56688114	4.58575	2.26176e-06	Superficial_Epithelial	Intron	5256	NA	chr1-56687387-56688114@LO018605.3
0.106268	LO018605.3	chr1-56691057-56691584	9.36735	3.71895e-21	Superficial_Epithelial	Intron	1786	NA	chr1-56691057-56691584@LO018605.3
0.0544969	LO018605.3	chr1-56693592-56693938	5.00965	2.72652e-07	Superficial_Epithelial	Promoter	-222	NA	chr1-56693592-56693938@LO018605.3
0.058806	CABZ01049361.1	chr1-56726860-56728069	5.96724	1.20647e-09	Superficial_Epithelial	Intergenic	-9047	NA	chr1-56726860-56728069@CABZ01049361.1
0.0856852	CABZ01049362.1	chr1-56726860-56728069	7.84398	2.18238e-15	Superficial_Epithelial	Intergenic	-9047	NA	chr1-56726860-56728069@CABZ01049362.1
0.0604587	CABZ01049362.1	chr1-56728644-56729818	5.37164	3.90127e-08	Superficial_Epithelial	Intergenic	-10831	NA	chr1-56728644-56729818@CABZ01049362.1
0.0521009	CABZ01049362.1	chr1-56735715-56736157	5.17525	1.138e-07	Superficial_Epithelial	Intergenic	-17902	NA	chr1-56735715-56736157@CABZ01049362.1
0.0603667	CABZ01049362.1	chr1-56738745-56739763	5.59684	1.09144e-08	Superficial_Epithelial	Intergenic	-15773	LOC100149227	chr1-56738745-56739763@CABZ01049362.1
0.0921415	CABZ01049361.1	chr1-56751044-56751865	8.25933	7.32479e-17	Superficial_Epithelial	Intergenic	-3671	LOC100149227	chr1-56751044-56751865@CABZ01049361.1
0.134865	CABZ01049362.1	chr1-56751044-56751865	12.8102	7.19033e-38	Superficial_Epithelial	Intergenic	-3671	LOC100149227	chr1-56751044-56751865@CABZ01049362.1
0.0580849	CABZ01049362.1	chr1-56753490-56754458	6.14791	3.92542e-10	Superficial_Epithelial	Intergenic	-1078	LOC100149227	chr1-56753490-56754458@CABZ01049362.1
0.0525494	CABZ01049361.1	chr1-56754939-56755490	6.69125	1.10638e-11	Superficial_Epithelial	Promoter	-46	LOC100149227	chr1-56754939-56755490@CABZ01049361.1
0.0709183	CABZ01049362.1	chr1-56754939-56755490	7.90305	1.36085e-15	Superficial_Epithelial	Promoter	-46	LOC100149227	chr1-56754939-56755490@CABZ01049362.1
0.0675247	CABZ01049361.1	chr1-56757306-56757635	8.20102	1.19181e-16	Superficial_Epithelial	Intron	1770	LOC100149227	chr1-56757306-56757635@CABZ01049361.1
0.0567515	CABZ01049361.1	chr1-56765469-56766990	5.28317	6.34826e-08	Superficial_Epithelial	Intergenic	-1273	NA	chr1-56765469-56766990@CABZ01049361.1
0.0872309	CABZ01049362.1	chr1-56757306-56757635	9.61769	3.36628e-22	Superficial_Epithelial	Intron	1770	LOC100149227	chr1-56757306-56757635@CABZ01049362.1
0.0500139	CABZ01049362.1	chr1-56764817-56765035	5.92713	1.54142e-09	Superficial_Epithelial	Intergenic	-3228	NA	chr1-56764817-56765035@CABZ01049362.1
0.0721868	CABZ01049362.1	chr1-56776318-56776534	8.6207	3.3274e-18	Superficial_Epithelial	Intergenic	-2961	NA	chr1-56776318-56776534@CABZ01049362.1
0.0516748	FO680692.1	chr1-56780186-56780652	7.61432	1.3254e-14	Superficial_Epithelial	Promoter	691	NA	chr1-56780186-56780652@FO680692.1
0.063293	b3gntl1	chr1-57435523-57436110	6.33029	1.22354e-10	Superficial_Epithelial	Intergenic	50534	NA	chr1-57435523-57436110@b3gntl1
0.0577217	si:dkey-1c7.3	chr1-57837674-57839329	5.73339	4.92208e-09	Superficial_Epithelial	Promoter	0	si:dkey-1c7.3	chr1-57837674-57839329@si:dkey-1c7.3
0.0609217	caspb	chr1-58061469-58062184	4.03916	2.6821e-05	Superficial_Epithelial	Intron	-2335	caspb	chr1-58061469-58062184@caspb
0.0505559	si:ch211-114l13.13	chr1-58063313-58064131	5.92819	1.53147e-09	Superficial_Epithelial	Promoter	607	caspb	chr1-58063313-58064131@si:ch211-114l13.13
0.0522682	si:ch211-15j1.4	chr1-58063313-58064131	5.29288	6.02029e-08	Superficial_Epithelial	Promoter	607	caspb	chr1-58063313-58064131@si:ch211-15j1.4
0.0510066	si:ch211-114l13.13	chr1-58156785-58158459	5.85477	2.38828e-09	Superficial_Epithelial	Intergenic	-1692	NA	chr1-58156785-58158459@si:ch211-114l13.13
0.0532302	si:ch211-15j1.5	chr1-58135959-58137371	5.49572	1.94563e-08	Superficial_Epithelial	Promoter	0	si:ch211-15j1.4	chr1-58135959-58137371@si:ch211-15j1.5
0.056443	si:ch211-15j1.5	chr1-58156785-58158459	5.96096	1.25381e-09	Superficial_Epithelial	Intergenic	-1692	NA	chr1-58156785-58158459@si:ch211-15j1.5
0.0741118	si:ch211-15j1.4	chr1-58135959-58137371	6.80889	4.91769e-12	Superficial_Epithelial	Promoter	0	si:ch211-15j1.4	chr1-58135959-58137371@si:ch211-15j1.4
0.0524659	si:ch211-15j1.4	chr1-58156785-58158459	5.3153	5.32395e-08	Superficial_Epithelial	Intergenic	-1692	NA	chr1-58156785-58158459@si:ch211-15j1.4
0.0711453	si:dkey-222h21.6	chr1-58289599-58291574	6.80421	5.08014e-12	Superficial_Epithelial	Promoter	0	NA	chr1-58289599-58291574@si:dkey-222h21.6
0.0543615	si:dkey-222h21.6	chr1-58361432-58362049	3.71565	0.00010134	Superficial_Epithelial	Promoter	497	si:dkey-222h21.1	chr1-58361432-58362049@si:dkey-222h21.6
0.0609889	si:ch73-236c18.3	chr1-58390517-58392064	5.59077	1.13031e-08	Superficial_Epithelial	Intron	-1566	si:ch73-236c18.2	chr1-58390517-58392064@si:ch73-236c18.3
0.0503606	si:ch73-236c18.3	chr1-58410765-58411684	5.13045	1.44526e-07	Superficial_Epithelial	Exon	10356	si:ch73-59p9.2	chr1-58410765-58411684@si:ch73-236c18.3
0.0554827	si:ch73-236c18.3	chr1-58418683-58419321	5.5757	1.23268e-08	Superficial_Epithelial	Intron	-5186	si:ch73-236c18.3	chr1-58418683-58419321@si:ch73-236c18.3
0.0689223	si:ch73-236c18.8	chr1-58418683-58419321	6.29697	1.51763e-10	Superficial_Epithelial	Intron	-5186	si:ch73-236c18.3	chr1-58418683-58419321@si:ch73-236c18.8
0.0541186	si:ch73-236c18.9.1	chr1-58418683-58419321	4.73979	1.0697e-06	Superficial_Epithelial	Intron	-5186	si:ch73-236c18.3	chr1-58418683-58419321@si:ch73-236c18.9.1
0.0554282	si:ch73-236c18.3	chr1-58419842-58420742	5.17844	1.11877e-07	Superficial_Epithelial	Intron	-3765	si:ch73-236c18.3	chr1-58419842-58420742@si:ch73-236c18.3
0.0660216	si:ch73-236c18.8	chr1-58419842-58420742	5.45022	2.51536e-08	Superficial_Epithelial	Intron	-3765	si:ch73-236c18.3	chr1-58419842-58420742@si:ch73-236c18.8
0.103901	si:ch73-236c18.8	chr1-58505519-58506012	11.014	1.63607e-28	Superficial_Epithelial	Promoter	0	si:ch211-233g6.2	chr1-58505519-58506012@si:ch73-236c18.8
0.153808	si:ch73-236c18.8	chr1-58506597-58507676	10.5103	3.87256e-26	Superficial_Epithelial	Promoter	-971	si:ch211-233g6.2	chr1-58506597-58507676@si:ch73-236c18.8
0.11053	si:ch73-236c18.8	chr1-58511625-58511958	9.77983	6.87209e-23	Superficial_Epithelial	5' UTR	2835	LOC793232	chr1-58511625-58511958@si:ch73-236c18.8
-0.0642473	si:ch73-236c18.8	chr1-58577052-58578733	-4.50353	3.34163e-06	Superficial_Epithelial	Downstream (1-2kb)	-3406	adgre5b.3	chr1-58577052-58578733@si:ch73-236c18.8
0.0948994	si:ch73-236c18.9.1	chr1-58505519-58506012	9.30822	6.49969e-21	Superficial_Epithelial	Promoter	0	si:ch211-233g6.2	chr1-58505519-58506012@si:ch73-236c18.9.1
0.142704	si:ch73-236c18.9.1	chr1-58506597-58507676	9.57637	5.02556e-22	Superficial_Epithelial	Promoter	-971	si:ch211-233g6.2	chr1-58506597-58507676@si:ch73-236c18.9.1
0.0528906	si:ch73-236c18.9.1	chr1-58511625-58511958	5.42734	2.85998e-08	Superficial_Epithelial	5' UTR	2835	LOC793232	chr1-58511625-58511958@si:ch73-236c18.9.1
0.0539773	si:ch73-236c18.9.1	chr1-58528930-58529816	4.90051	4.7793e-07	Superficial_Epithelial	Intergenic	-1174	NA	chr1-58528930-58529816@si:ch73-236c18.9.1
-0.0542302	si:ch73-236c18.9.1	chr1-58577052-58578733	-3.26686	0.000543737	Superficial_Epithelial	Downstream (1-2kb)	-3406	adgre5b.3	chr1-58577052-58578733@si:ch73-236c18.9.1
0.057446	slc27a1b.1	chr1-58561806-58562645	2.40984	0.00797979	Superficial_Epithelial	Promoter	0	slc27a1b	chr1-58561806-58562645@slc27a1b.1
0.0559321	si:ch73-221f6.3	chr1-58584547-58584894	8.91672	2.40142e-19	Superficial_Epithelial	Exon	7972	adgre5b.2	chr1-58584547-58584894@si:ch73-221f6.3
0.0505635	tmed1b	chr1-58796502-58797316	3.03069	0.00121998	Superficial_Epithelial	Intergenic	-30078	NA	chr1-58796502-58797316@tmed1b
0.0525287	CABZ01115881.1	chr1-58964988-58966487	4.7543	9.95684e-07	Superficial_Epithelial	Downstream (<1kb)	-1593	sh2d3a	chr1-58964988-58966487@CABZ01115881.1
0.0545082	CAMSAP3	chr1-59081619-59081802	5.98575	1.07697e-09	Superficial_Epithelial	Intron	-3969	si:zfos-2330d3.1	chr1-59081619-59081802@CAMSAP3
0.0539241	col5a3b	chr1-59279712-59281136	2.51072	0.00602418	Superficial_Epithelial	Exon	6274	col5a3b	chr1-59279712-59281136@col5a3b
0.0527542	col5a3b	chr1-59295570-59296037	2.56651	0.00513644	Superficial_Epithelial	Intron	1697	rdh8b	chr1-59295570-59296037@col5a3b
-0.0646422	FP236157.7	chr1-59532503-59533501	-4.30289	8.4294e-06	Superficial_Epithelial	Promoter	0	sp6	chr1-59532503-59533501@FP236157.7
0.0819126	sp6	chr1-59532503-59533501	4.98627	3.07777e-07	Superficial_Epithelial	Promoter	0	sp6	chr1-59532503-59533501@sp6
0.0568903	sp6	chr1-59534072-59535161	3.39442	0.00034387	Superficial_Epithelial	Promoter	755	sp6	chr1-59534072-59535161@sp6
0.0777978	cldn1	chr2-25053-26634	3.37699	0.000366413	Superficial_Epithelial	Intergenic	-2518	NA	chr2-25053-26634@cldn1
0.0990004	cldn1	chr2-59510-60975	3.7667	8.27093e-05	Superficial_Epithelial	Downstream (2-3kb)	4554	zgc:153913	chr2-59510-60975@cldn1
0.115006	cldn1	chr2-62245-62836	4.49624	3.4583e-06	Superficial_Epithelial	Downstream (<1kb)	2693	zgc:153913	chr2-62245-62836@cldn1
0.120315	cldn1	chr2-68470-69390	4.60931	2.02004e-06	Superficial_Epithelial	Promoter	0	NA	chr2-68470-69390@cldn1
0.055497	cldn1	chr2-69787-70239	2.92703	0.00171109	Superficial_Epithelial	Promoter	998	NA	chr2-69787-70239@cldn1
0.0845218	cldn1	chr2-71350-72026	4.00044	3.16124e-05	Superficial_Epithelial	Exon	2561	NA	chr2-71350-72026@cldn1
0.0553591	CU693494.2	chr2-347567-348864	4.30409	8.38369e-06	Superficial_Epithelial	Intergenic	-2972	si:dkey-33c14.3	chr2-347567-348864@CU693494.2
0.0811912	CU693494.2	chr2-432896-433645	6.0257	8.41913e-10	Superficial_Epithelial	Intergenic	19526	mylk4a	chr2-432896-433645@CU693494.2
0.0597626	ftr93	chr2-680113-680937	6.63809	1.58887e-11	Superficial_Epithelial	Intergenic	8110	foxc1a	chr2-680113-680937@ftr93
0.0512928	foxq1a	chr2-719219-719771	3.90685	4.67537e-05	Superficial_Epithelial	Downstream (1-2kb)	2385	foxq1a	chr2-719219-719771@foxq1a
0.0784184	foxq1a	chr2-721184-722610	8.1702	1.53939e-16	Superficial_Epithelial	Promoter	0	foxq1a	chr2-721184-722610@foxq1a
0.0630714	foxq1a	chr2-727360-728204	5.48346	2.08546e-08	Superficial_Epithelial	Intergenic	4660	NA	chr2-727360-728204@foxq1a
0.0520727	foxq1a	chr2-750618-751568	3.93594	4.14353e-05	Superficial_Epithelial	Intergenic	-17754	NA	chr2-750618-751568@foxq1a
0.0627312	foxq1a	chr2-776440-777342	5.78382	3.65106e-09	Superficial_Epithelial	Intergenic	-43576	NA	chr2-776440-777342@foxq1a
0.0552974	si:ch211-241e1.5	chr2-970004-970657	6.1649	3.52629e-10	Superficial_Epithelial	Exon	-13779	si:ch211-241e1.3	chr2-970004-970657@si:ch211-241e1.5
0.0866889	si:ch211-241e1.3	chr2-941405-942506	1.76502	0.0387805	Superficial_Epithelial	3' UTR	5453	si:ch211-241e1.5	chr2-941405-942506@si:ch211-241e1.3
0.100433	si:ch211-241e1.3	chr2-943358-944542	2.95757	0.00155038	Superficial_Epithelial	3' UTR	-3526	NA	chr2-943358-944542@si:ch211-241e1.3
0.0630244	AL935300.1	chr2-948058-953254	4.89412	4.9374e-07	Superficial_Epithelial	Promoter	0	NA	chr2-948058-953254@AL935300.1
0.107311	si:ch211-241e1.3	chr2-948058-953254	1.95209	0.0254641	Superficial_Epithelial	Promoter	0	NA	chr2-948058-953254@si:ch211-241e1.3
0.0680291	si:ch211-241e1.3	chr2-955846-956322	2.39297	0.00835619	Superficial_Epithelial	Promoter	0	si:ch211-241e1.3	chr2-955846-956322@si:ch211-241e1.3
0.0890323	si:ch211-241e1.3	chr2-961078-961355	4.41677	5.00926e-06	Superficial_Epithelial	Intron	-4853	si:ch211-241e1.3	chr2-961078-961355@si:ch211-241e1.3
0.161699	si:ch211-241e1.3	chr2-961892-964416	4.34306	7.02543e-06	Superficial_Epithelial	Exon	-5667	si:ch211-241e1.3	chr2-961892-964416@si:ch211-241e1.3
0.0863614	si:ch211-241e1.3	chr2-977338-978621	2.35618	0.00923209	Superficial_Epithelial	Intron	6796	si:ch211-241e1.3	chr2-977338-978621@si:ch211-241e1.3
0.071397	si:ch211-241e1.3	chr2-982701-983318	1.64673	0.0498064	Superficial_Epithelial	Exon	2099	si:ch211-241e1.3	chr2-982701-983318@si:ch211-241e1.3
0.0925848	si:ch211-241e1.3	chr2-984852-985637	2.09496	0.0180873	Superficial_Epithelial	Promoter	0	si:ch211-241e1.3	chr2-984852-985637@si:ch211-241e1.3
0.0773445	si:ch211-241e1.3	chr2-1053458-1054319	2.95926	0.00154187	Superficial_Epithelial	Intron	51354	cacna1eb	chr2-1053458-1054319@si:ch211-241e1.3
0.0567395	dab1b	chr2-1502907-1503184	13.0802	2.13531e-39	Superficial_Epithelial	Exon	10817	c8b	chr2-1502907-1503184@dab1b
0.0650272	dspa	chr2-2044027-2045845	2.30232	0.0106585	Superficial_Epithelial	Exon	-23983	tubb2	chr2-2044027-2045845@dspa
0.0627187	dspa	chr2-2088121-2088786	2.52613	0.00576631	Superficial_Epithelial	Intron	7269	slc22a23	chr2-2088121-2088786@dspa
0.0531835	dspa	chr2-2104665-2105267	2.82656	0.00235255	Superficial_Epithelial	Intergenic	-5004	dspa	chr2-2104665-2105267@dspa
0.0609547	dspa	chr2-2106722-2107679	2.35216	0.00933232	Superficial_Epithelial	Intergenic	-2592	dspa	chr2-2106722-2107679@dspa
0.0535613	dspa	chr2-2110161-2111106	2.36934	0.00890994	Superficial_Epithelial	Promoter	0	dspa	chr2-2110161-2111106@dspa
0.0579196	dspa	chr2-2149649-2151668	1.98587	0.0235237	Superficial_Epithelial	Exon	-7317	dspa	chr2-2149649-2151668@dspa
0.0598986	dspa	chr2-2166132-2167006	1.95933	0.025037	Superficial_Epithelial	Intergenic	-1541	higd1a	chr2-2166132-2167006@dspa
0.0525822	si:ch1073-82l19.1	chr2-2942770-2943012	4.68853	1.37587e-06	Superficial_Epithelial	Exon	-5545	si:ch1073-82l19.1	chr2-2942770-2943012@si:ch1073-82l19.1
0.0524259	wnt3a	chr2-3094726-3095415	3.69645	0.000109318	Superficial_Epithelial	Intergenic	-17699	arf1	chr2-3094726-3095415@wnt3a
0.066118	wnt3a	chr2-3117375-3118638	4.20552	1.30242e-05	Superficial_Epithelial	Intron	7436	NA	chr2-3117375-3118638@wnt3a
0.0522936	wnt3a	chr2-3125892-3127076	3.15989	0.000789147	Superficial_Epithelial	Promoter	0	NA	chr2-3125892-3127076@wnt3a
0.0554254	wnt9a	chr2-3136004-3137375	2.18508	0.0144414	Superficial_Epithelial	Intron	-9930	NA	chr2-3136004-3137375@wnt9a
0.0671496	wnt3a	chr2-3151060-3152085	3.53173	0.000206426	Superficial_Epithelial	Intron	6834	wnt3a	chr2-3151060-3152085@wnt3a
0.0541074	wnt9a	chr2-3158722-3159459	3.0532	0.00113206	Superficial_Epithelial	Promoter	0	wnt3a	chr2-3158722-3159459@wnt9a
0.0667707	wnt9a	chr2-3192488-3193571	3.10322	0.000957138	Superficial_Epithelial	Intergenic	-7774	wnt9a	chr2-3192488-3193571@wnt9a
0.0633665	wnt9a	chr2-3198423-3198942	3.7382	9.26721e-05	Superficial_Epithelial	Intergenic	-2403	wnt9a	chr2-3198423-3198942@wnt9a
0.0777172	wnt9a	chr2-3200853-3202520	3.76361	8.37376e-05	Superficial_Epithelial	Promoter	0	wnt9a	chr2-3200853-3202520@wnt9a
0.0593983	wnt9a	chr2-3210180-3211878	2.97075	0.00148536	Superficial_Epithelial	Intron	8835	wnt9a	chr2-3210180-3211878@wnt9a
0.0597992	wnt9a	chr2-3223369-3224541	2.61444	0.00446875	Superficial_Epithelial	Intron	22024	wnt9a	chr2-3223369-3224541@wnt9a
0.064987	wnt9a	chr2-3238771-3239793	3.26026	0.000556553	Superficial_Epithelial	Intron	37426	wnt9a	chr2-3238771-3239793@wnt9a
0.0661055	wnt9a	chr2-3249793-3250988	2.55617	0.00529152	Superficial_Epithelial	Intron	48448	wnt9a	chr2-3249793-3250988@wnt9a
0.0610502	CU633991.2	chr2-3346334-3346567	5.62709	9.16396e-09	Superficial_Epithelial	Intergenic	56453	snap47	chr2-3346334-3346567@CU633991.2
0.0550794	cyp8b2	chr2-3452316-3454113	5.8387	2.63042e-09	Superficial_Epithelial	Promoter	0	cyp8b2	chr2-3452316-3454113@cyp8b2
0.0630039	cyp8b2	chr2-3454702-3455214	5.63395	8.80662e-09	Superficial_Epithelial	Intergenic	2112	cyp8b2	chr2-3454702-3455214@cyp8b2
0.0655665	cyp8b2	chr2-3458299-3458607	6.75532	7.12597e-12	Superficial_Epithelial	Intergenic	5709	cyp8b2	chr2-3458299-3458607@cyp8b2
0.0817083	cyp8b3	chr2-3458299-3458607	7.81698	2.70538e-15	Superficial_Epithelial	Intergenic	5709	cyp8b2	chr2-3458299-3458607@cyp8b3
0.0510761	egfra	chr2-3695623-3696911	1.78318	0.0372783	Superficial_Epithelial	Promoter	0	egfra	chr2-3695623-3696911@egfra
0.0597653	egfra	chr2-3724795-3725695	2.68367	0.00364094	Superficial_Epithelial	Intron	28669	egfra	chr2-3724795-3725695@egfra
0.0546863	egfra	chr2-3727387-3728348	2.85255	0.00216851	Superficial_Epithelial	Intron	31261	egfra	chr2-3727387-3728348@egfra
0.0510874	egfra	chr2-3735448-3736547	1.96367	0.0247843	Superficial_Epithelial	Intron	-38195	egfra	chr2-3735448-3736547@egfra
0.0634686	egfra	chr2-3761655-3762584	2.73955	0.00307619	Superficial_Epithelial	Intron	-12158	egfra	chr2-3761655-3762584@egfra
0.0524302	mkxb	chr2-4080183-4081400	6.32138	1.2962e-10	Superficial_Epithelial	Exon	5070	mib1	chr2-4080183-4081400@mkxb
0.0620955	CU929154.1	chr2-4769267-4769449	7.01089	1.184e-12	Superficial_Epithelial	Intron	18117	tnk2b	chr2-4769267-4769449@CU929154.1
0.0594003	tfr1a	chr2-4883222-4884671	5.101	1.68936e-07	Superficial_Epithelial	Intergenic	-8256	tfr1a	chr2-4883222-4884671@tfr1a
0.0789736	rgs13	chr2-6481996-6482642	7.33629	1.09802e-13	Superficial_Epithelial	Promoter	0	rgs13	chr2-6481996-6482642@rgs13
0.129862	rgs5b	chr2-6885443-6887317	9.94252	1.35932e-23	Superficial_Epithelial	Promoter	0	rgs5b	chr2-6885443-6887317@rgs5b
0.0791239	xpr1b	chr2-6996013-6996439	3.55817	0.000186724	Superficial_Epithelial	3' UTR	-2930	xpr1b	chr2-6996013-6996439@xpr1b
0.0706883	xpr1b	chr2-6998982-6999928	1.94634	0.025807	Superficial_Epithelial	Promoter	0	xpr1b	chr2-6998982-6999928@xpr1b
0.0574189	xpr1b	chr2-7019673-7020467	1.76487	0.0387932	Superficial_Epithelial	Intron	20304	xpr1b	chr2-7019673-7020467@xpr1b
0.11485	xpr1b	chr2-7029960-7030865	3.91066	4.60224e-05	Superficial_Epithelial	Intron	-11266	xpr1b	chr2-7029960-7030865@xpr1b
0.0736583	zgc:153115	chr2-7245162-7247521	5.03473	2.39266e-07	Superficial_Epithelial	Promoter	0	zgc:153115	chr2-7245162-7247521@zgc:153115
0.0567717	asip2b	chr2-7472964-7473991	4.28364	9.19285e-06	Superficial_Epithelial	Intergenic	20473	NA	chr2-7472964-7473991@asip2b
0.0548012	chst2a	chr2-8189909-8190607	6.04834	7.3175e-10	Superficial_Epithelial	Promoter	624	NA	chr2-8189909-8190607@chst2a
0.0670515	dipk2aa	chr2-8184946-8185291	4.39532	5.53052e-06	Superficial_Epithelial	Intergenic	-3994	NA	chr2-8184946-8185291@dipk2aa
0.0556089	dipk2aa	chr2-8189909-8190607	1.86765	0.0309057	Superficial_Epithelial	Promoter	624	NA	chr2-8189909-8190607@dipk2aa
0.0747892	dipk2aa	chr2-8271403-8271843	3.77381	8.0387e-05	Superficial_Epithelial	Intron	10294	dipk2aa	chr2-8271403-8271843@dipk2aa
0.0595334	dipk2aa	chr2-8324561-8325244	3.20642	0.000671994	Superficial_Epithelial	Intergenic	63452	dipk2aa	chr2-8324561-8325244@dipk2aa
0.0876293	si:ch211-71m22.1	chr2-8611357-8612550	5.32627	5.01237e-08	Superficial_Epithelial	Promoter	0	si:ch211-71m22.1	chr2-8611357-8612550@si:ch211-71m22.1
0.0548692	st6galnac5a	chr2-9233805-9234928	5.4987	1.91299e-08	Superficial_Epithelial	Intron	24355	st6galnac5a	chr2-9233805-9234928@st6galnac5a
0.0571148	ap2m1a	chr2-9817828-9822895	4.35416	6.67876e-06	Superficial_Epithelial	Promoter	0	ap2m1a	chr2-9817828-9822895@ap2m1a
0.0787362	wls	chr2-10354532-10356032	3.6119	0.000151982	Superficial_Epithelial	Exon	-15719	gng12a	chr2-10354532-10356032@wls
0.0605957	wls	chr2-10393776-10394710	2.36981	0.00889859	Superficial_Epithelial	Intron	-7038	wls	chr2-10393776-10394710@wls
0.0510656	wls	chr2-10403919-10405107	2.03714	0.020818	Superficial_Epithelial	Exon	-17181	wls	chr2-10403919-10405107@wls
0.0622051	cdc7	chr2-10963256-10964069	4.43167	4.6752e-06	Superficial_Epithelial	Intron	-20163	ssbp3a	chr2-10963256-10964069@cdc7
0.0518028	cdc7	chr2-10970215-10971205	3.4938	0.000238097	Superficial_Epithelial	Intron	-27122	ssbp3a	chr2-10970215-10971205@cdc7
0.0666034	ssbp3a	chr2-11012301-11013501	3.65224	0.000129981	Superficial_Epithelial	Intron	5644	NA	chr2-11012301-11013501@ssbp3a
0.0712801	ssbp3a	chr2-11028718-11029674	4.68891	1.37331e-06	Superficial_Epithelial	Promoter	0	acot11a	chr2-11028718-11029674@ssbp3a
0.0545584	gpr158b	chr2-12215998-12216456	4.27148	9.70914e-06	Superficial_Epithelial	Intron	8083	NA	chr2-12215998-12216456@gpr158b
0.0531865	kmt2cb	chr2-12847140-12849167	2.6383	0.00416608	Superficial_Epithelial	Promoter	0	kmt2cb	chr2-12847140-12849167@kmt2cb
0.0507481	sgip1b	chr2-14338771-14339776	4.87819	5.35308e-07	Superficial_Epithelial	Intron	47559	sgip1b	chr2-14338771-14339776@sgip1b
0.0587581	BX510915.1	chr2-14426059-14427039	4.13419	1.78106e-05	Superficial_Epithelial	Promoter	0	NA	chr2-14426059-14427039@BX510915.1
0.0891651	f3b	chr2-15103468-15103840	11.5721	2.85365e-31	Superficial_Epithelial	Exon	2726	f3b	chr2-15103468-15103840@f3b
0.080054	f3b	chr2-15106398-15106694	11.5615	3.22743e-31	Superficial_Epithelial	3' UTR	1022	NA	chr2-15106398-15106694@f3b
0.0678853	f3b	chr2-15107247-15108237	7.76383	4.12017e-15	Superficial_Epithelial	Promoter	0	NA	chr2-15107247-15108237@f3b
0.119912	f3b	chr2-15109065-15109623	13.9458	1.66797e-44	Superficial_Epithelial	3' UTR	-1349	NA	chr2-15109065-15109623@f3b
0.079988	f3b	chr2-15109802-15110016	9.22308	1.44338e-20	Superficial_Epithelial	3' UTR	-2086	NA	chr2-15109802-15110016@f3b
0.0825265	f3b	chr2-15110144-15110651	10.4812	5.26978e-26	Superficial_Epithelial	Intron	-2428	NA	chr2-15110144-15110651@f3b
0.0624304	arhgap29b	chr2-15128097-15129425	2.67905	0.00369157	Superficial_Epithelial	Promoter	0	arhgap29b	chr2-15128097-15129425@arhgap29b
0.0626324	arhgap29b	chr2-15142268-15143429	2.37527	0.00876816	Superficial_Epithelial	Intron	13850	arhgap29b	chr2-15142268-15143429@arhgap29b
0.0529293	arhgap29b	chr2-15143910-15145252	2.27419	0.0114772	Superficial_Epithelial	Intron	15492	arhgap29b	chr2-15143910-15145252@arhgap29b
0.0541831	col11a1b	chr2-15527057-15527492	3.01465	0.00128637	Superficial_Epithelial	Intron	35702	col11a1b	chr2-15527057-15527492@col11a1b
0.0619729	col11a1b	chr2-15561499-15561963	3.77469	8.01019e-05	Superficial_Epithelial	Intron	1231	col11a1b	chr2-15561499-15561963@col11a1b
0.0536333	arhgef4	chr2-16266506-16267856	1.7681	0.0385218	Superficial_Epithelial	Exon	-11724	arhgef4	chr2-16266506-16267856@arhgef4
0.0653623	arhgef4	chr2-16269034-16270930	2.15638	0.015527	Superficial_Epithelial	Exon	-14252	arhgef4	chr2-16269034-16270930@arhgef4
0.051937	arhgef4	chr2-16284132-16284664	2.33046	0.0098908	Superficial_Epithelial	Intron	-29350	arhgef4	chr2-16284132-16284664@arhgef4
0.0531942	arhgef4	chr2-16287137-16288202	1.88599	0.0296484	Superficial_Epithelial	Intron	-32355	arhgef4	chr2-16287137-16288202@arhgef4
0.0989443	arhgef4	chr2-16325492-16326748	3.56383	0.000182738	Superficial_Epithelial	Intron	32294	arhgef4	chr2-16325492-16326748@arhgef4
0.0867942	arhgef4	chr2-16337798-16338883	3.12589	0.000886339	Superficial_Epithelial	Intron	20159	arhgef4	chr2-16337798-16338883@arhgef4
0.104836	arhgef4	chr2-16348066-16348914	4.33129	7.412e-06	Superficial_Epithelial	Intron	10128	arhgef4	chr2-16348066-16348914@arhgef4
0.0635154	arhgef4	chr2-16350427-16351378	2.47913	0.00658525	Superficial_Epithelial	Exon	7664	arhgef4	chr2-16350427-16351378@arhgef4
0.0683994	eif4g1a	chr2-16798254-16800456	2.46932	0.0067686	Superficial_Epithelial	Promoter	0	eif4g1a	chr2-16798254-16800456@eif4g1a
0.0712379	eif4g1a	chr2-16833391-16834286	2.08276	0.0186366	Superficial_Epithelial	Exon	3702	NA	chr2-16833391-16834286@eif4g1a
0.0991139	eif4g1a	chr2-16894125-16895439	2.80555	0.00251157	Superficial_Epithelial	Exon	45694	clcn2a	chr2-16894125-16895439@eif4g1a
0.077577	st3gal3b	chr2-17424412-17424607	5.39731	3.38246e-08	Superficial_Epithelial	Intergenic	-27049	NA	chr2-17424412-17424607@st3gal3b
0.0518426	st3gal3b	chr2-17468722-17469597	3.85374	5.81634e-05	Superficial_Epithelial	Exon	17066	NA	chr2-17468722-17469597@st3gal3b
0.072049	ptprfb	chr2-17945720-17947476	1.7043	0.0441623	Superficial_Epithelial	Promoter	0	ptprfb	chr2-17945720-17947476@ptprfb
0.0662986	ptprfb	chr2-17993865-17994792	2.42354	0.00768506	Superficial_Epithelial	Intergenic	-22208	NA	chr2-17993865-17994792@ptprfb
0.0586842	glula	chr2-18987834-18989259	6.33365	1.19713e-10	Superficial_Epithelial	Promoter	0	glula	chr2-18987834-18989259@glula
0.0556709	elovl1a	chr2-19210034-19211333	4.01148	3.01702e-05	Superficial_Epithelial	Intron	11100	cdc20	chr2-19210034-19211333@elovl1a
0.0539324	zfyve9a	chr2-19311579-19312283	4.44895	4.3145e-06	Superficial_Epithelial	Exon	9644	zfyve9a	chr2-19311579-19312283@zfyve9a
0.0604729	plppr5a	chr2-20275143-20275397	5.16012	1.23398e-07	Superficial_Epithelial	Exon	48504	plppr5a	chr2-20275143-20275397@plppr5a
0.0519377	agla	chr2-20568367-20569067	5.33206	4.85522e-08	Superficial_Epithelial	Exon	5126	si:ch211-267e7.3	chr2-20568367-20569067@agla
0.10235	si:ch211-267e7.3	chr2-20505886-20506682	7.54547	2.25325e-14	Superficial_Epithelial	Exon	9663	agla	chr2-20505886-20506682@si:ch211-267e7.3
0.0566346	dusp12	chr2-20708708-20709410	6.59998	2.05609e-11	Superficial_Epithelial	Intron	-4185	LOC101882305	chr2-20708708-20709410@dusp12
0.0501153	ptgs2a	chr2-20848542-20849510	2.19192	0.0141927	Superficial_Epithelial	Exon	17248	tpra	chr2-20848542-20849510@ptgs2a
0.104611	ptgs2a	chr2-20874657-20875928	3.85266	5.84208e-05	Superficial_Epithelial	Exon	6371	odr4	chr2-20874657-20875928@ptgs2a
0.085978	ptgs2a	chr2-20879491-20880228	3.46797	0.000262198	Superficial_Epithelial	3' UTR	10201	pdca	chr2-20879491-20880228@ptgs2a
0.0572809	ptgs2a	chr2-20882113-20883080	1.92089	0.0273728	Superficial_Epithelial	3' UTR	7349	pdca	chr2-20882113-20883080@ptgs2a
0.0814966	ptgs2a	chr2-20884618-20885590	2.73396	0.0031289	Superficial_Epithelial	3' UTR	4839	pdca	chr2-20884618-20885590@ptgs2a
0.106311	ptgs2a	chr2-20892673-20893744	3.72515	9.75982e-05	Superficial_Epithelial	Intergenic	-2244	pdca	chr2-20892673-20893744@ptgs2a
0.0646957	pla2g4aa	chr2-20892673-20893744	3.67865	0.000117237	Superficial_Epithelial	Intergenic	-2244	pdca	chr2-20892673-20893744@pla2g4aa
0.1138	ptgs2a	chr2-20895830-20896696	4.81665	7.2996e-07	Superficial_Epithelial	Intergenic	-5401	pdca	chr2-20895830-20896696@ptgs2a
0.102147	ptgs2a	chr2-20899609-20900180	5.34601	4.49562e-08	Superficial_Epithelial	Intergenic	-9180	pdca	chr2-20899609-20900180@ptgs2a
0.110146	ptgs2a	chr2-20902335-20903273	4.47814	3.76476e-06	Superficial_Epithelial	Intergenic	-11906	pdca	chr2-20902335-20903273@ptgs2a
0.0650265	ptgs2a	chr2-20907025-20908230	1.91775	0.0275711	Superficial_Epithelial	Intergenic	12105	ptgs2a	chr2-20907025-20908230@ptgs2a
0.119291	ptgs2a	chr2-20915380-20916400	4.3325	7.37113e-06	Superficial_Epithelial	Downstream (<1kb)	3935	ptgs2a	chr2-20915380-20916400@ptgs2a
0.0842741	ptgs2a	chr2-20920757-20921578	3.25203	0.000572919	Superficial_Epithelial	Promoter	-422	ptgs2a	chr2-20920757-20921578@ptgs2a
0.0990843	ptgs2a	chr2-20922881-20924025	3.6024	0.000157648	Superficial_Epithelial	Promoter	0	ptgs2a	chr2-20922881-20924025@ptgs2a
0.0835566	ptgs2a	chr2-20937304-20938830	2.96171	0.00152966	Superficial_Epithelial	Exon	11102	pla2g4aa	chr2-20937304-20938830@ptgs2a
0.0715598	ptgs2a	chr2-20960649-20962224	2.75353	0.00294786	Superficial_Epithelial	Intergenic	-5449	arpc5a	chr2-20960649-20962224@ptgs2a
0.066794	pla2g4aa	chr2-20937304-20938830	4.04205	2.64926e-05	Superficial_Epithelial	Exon	11102	pla2g4aa	chr2-20937304-20938830@pla2g4aa
0.0578707	plcd1b	chr2-21437293-21438836	5.02053	2.57645e-07	Superficial_Epithelial	Promoter	0	plcd1b	chr2-21437293-21438836@plcd1b
0.0523838	inhbab	chr2-21549593-21550196	3.55961	0.0001857	Superficial_Epithelial	Intergenic	-55351	mplkip	chr2-21549593-21550196@inhbab
0.0675812	fbxl7	chr2-21659529-21660497	5.20701	9.59555e-08	Superficial_Epithelial	Intron	25401	fbxl7	chr2-21659529-21660497@fbxl7
0.0546126	chd7	chr2-21784534-21785562	2.35558	0.00924678	Superficial_Epithelial	Exon	1264	chd7	chr2-21784534-21785562@chd7
0.0619469	chd7	chr2-21809153-21810291	2.41761	0.00781145	Superficial_Epithelial	Intron	9130	chd7	chr2-21809153-21810291@chd7
0.0513683	chd7	chr2-21846949-21848233	2.42272	0.00770245	Superficial_Epithelial	Promoter	0	rab2a	chr2-21846949-21848233@chd7
0.0586027	tox	chr2-21893110-21893728	4.61437	1.97146e-06	Superficial_Epithelial	Intron	10229	NA	chr2-21893110-21893728@tox
0.0504367	tox	chr2-22006856-22008473	3.5198	0.00021594	Superficial_Epithelial	Intron	23871	tox	chr2-22006856-22008473@tox
0.0600809	tox	chr2-22030361-22031149	4.45668	4.162e-06	Superficial_Epithelial	Intron	-11596	tox	chr2-22030361-22031149@tox
0.0653084	cyp7a1	chr2-22116959-22117254	6.11064	4.96171e-10	Superficial_Epithelial	Intergenic	35543	cyp7a1	chr2-22116959-22117254@cyp7a1
0.058728	cyp7a1	chr2-22152422-22153469	5.90256	1.78947e-09	Superficial_Epithelial	Promoter	0	cyp7a1	chr2-22152422-22153469@cyp7a1
0.0600402	cyp7a1	chr2-22158185-22158792	5.55052	1.42408e-08	Superficial_Epithelial	Intergenic	-5388	cyp7a1	chr2-22158185-22158792@cyp7a1
0.0854654	cyp7a1	chr2-22187416-22187731	12.9194	1.75042e-38	Superficial_Epithelial	Intergenic	-34619	cyp7a1	chr2-22187416-22187731@cyp7a1
0.07085	fam110b	chr2-22232068-22232916	5.12725	1.47005e-07	Superficial_Epithelial	Intron	-1742	fam110b	chr2-22232068-22232916@fam110b
0.0615926	fam110b	chr2-22247956-22248525	4.97332	3.29078e-07	Superficial_Epithelial	Intron	-17630	fam110b	chr2-22247956-22248525@fam110b
0.0641935	pkn2	chr2-22376885-22378292	3.09974	0.00096845	Superficial_Epithelial	Intron	13061	hs2st1a	chr2-22376885-22378292@pkn2
0.0516514	pkn2	chr2-22416534-22417726	1.99915	0.0227961	Superficial_Epithelial	Promoter	259	pkn2	chr2-22416534-22417726@pkn2
0.0524994	lrrc8da	chr2-22416534-22417726	2.2253	0.0130306	Superficial_Epithelial	Promoter	259	pkn2	chr2-22416534-22417726@lrrc8da
0.0570028	lrrc8da	chr2-22569245-22570201	2.53023	0.00569932	Superficial_Epithelial	Promoter	0	cldn18	chr2-22569245-22570201@lrrc8da
0.0515534	zgc:161973	chr2-22607202-22607668	5.26133	7.15085e-08	Superficial_Epithelial	Exon	4901	2024-09-02	chr2-22607202-22607668@zgc:161973
0.0649356	espnlb	chr2-22694027-22694527	6.94772	1.85619e-12	Superficial_Epithelial	Promoter	0	kif1ab	chr2-22694027-22694527@espnlb
0.0531688	amotl2b	chr2-22851222-22852185	3.77248	8.08166e-05	Superficial_Epithelial	Promoter	0	amotl2b	chr2-22851222-22852185@amotl2b
0.051013	myo7bb	chr2-22898360-22898922	6.41925	6.84751e-11	Superficial_Epithelial	Promoter	-959	NA	chr2-22898360-22898922@myo7bb
0.0637963	mknk2a	chr2-23018122-23019937	3.76186	8.43266e-05	Superficial_Epithelial	Intron	6289	mknk2a	chr2-23018122-23019937@mknk2a
0.0579405	prrx1a	chr2-23246802-23247175	5.02775	2.48133e-07	Superficial_Epithelial	Intron	-10602	NA	chr2-23246802-23247175@prrx1a
0.0703297	kifap3b	chr2-23309467-23310109	5.22236	8.83292e-08	Superficial_Epithelial	Intron	35135	kifap3b	chr2-23309467-23310109@kifap3b
0.0505513	niban1b	chr2-23318737-23319360	2.9622	0.00152725	Superficial_Epithelial	Intron	29756	niban1b	chr2-23318737-23319360@niban1b
0.0811106	csrnp1a	chr2-23790431-23791374	7.94602	9.63007e-16	Superficial_Epithelial	Promoter	0	csrnp1a	chr2-23790431-23791374@csrnp1a
0.0680638	csrnp1a	chr2-23792256-23793458	7.41836	5.92912e-14	Superficial_Epithelial	Intron	1508	csrnp1a	chr2-23792256-23793458@csrnp1a
0.0539185	tgfbr1a	chr2-23904259-23905589	4.22499	1.19475e-05	Superficial_Epithelial	Intron	25947	tgfbr1a	chr2-23904259-23905589@tgfbr1a
0.0510556	myh7l	chr2-24348202-24349209	2.92058	0.00174693	Superficial_Epithelial	Promoter	0	ano8a	chr2-24348202-24349209@myh7l
0.104684	ano8a	chr2-24330583-24332120	6.99485	1.32773e-12	Superficial_Epithelial	Exon	8736	ano8a	chr2-24330583-24332120@ano8a
0.0541905	ano8a	chr2-24337513-24339030	4.64929	1.66542e-06	Superficial_Epithelial	Exon	1826	ano8a	chr2-24337513-24339030@ano8a
0.146966	angptl4	chr2-24536043-24537315	4.44357	4.4239e-06	Superficial_Epithelial	Promoter	0	angptl4	chr2-24536043-24537315@angptl4
0.0908003	angptl4	chr2-24538698-24539416	2.98192	0.00143224	Superficial_Epithelial	Promoter	-631	angptl4	chr2-24538698-24539416@angptl4
0.0608002	angptl4	chr2-24539847-24540116	2.97237	0.00147755	Superficial_Epithelial	Promoter	0	angptl4	chr2-24539847-24540116@angptl4
0.109191	angptl4	chr2-24541418-24542251	2.99678	0.00136423	Superficial_Epithelial	3' UTR	1209	angptl4	chr2-24541418-24542251@angptl4
0.0826469	angptl4	chr2-24542609-24543065	1.84623	0.0324296	Superficial_Epithelial	Intergenic	2400	angptl4	chr2-24542609-24543065@angptl4
0.0624203	angptl4	chr2-24563772-24565352	1.70165	0.0444105	Superficial_Epithelial	Promoter	0	crsp7	chr2-24563772-24565352@angptl4
0.0781965	angptl4	chr2-24630416-24631048	2.50875	0.0060579	Superficial_Epithelial	Intergenic	-7319	mast3a	chr2-24630416-24631048@angptl4
0.0707585	ppp2r3a	chr2-25142894-25143752	5.72109	5.29199e-09	Superficial_Epithelial	Promoter	0	nceh1a	chr2-25142894-25143752@ppp2r3a
0.060343	ppp2r3a	chr2-25173244-25174982	4.57625	2.36697e-06	Superficial_Epithelial	Intergenic	-13935	NA	chr2-25173244-25174982@ppp2r3a
0.0652608	ppp2r3a	chr2-25184942-25186318	5.0451	2.26644e-07	Superficial_Epithelial	Intergenic	-12330	ppp2r3a	chr2-25184942-25186318@ppp2r3a
0.0770306	ppp2r3a	chr2-25190892-25191840	5.81907	2.95874e-09	Superficial_Epithelial	Intergenic	-6808	ppp2r3a	chr2-25190892-25191840@ppp2r3a
0.103179	ppp2r3a	chr2-25196460-25197107	7.45047	4.65045e-14	Superficial_Epithelial	Intergenic	-1541	ppp2r3a	chr2-25196460-25197107@ppp2r3a
0.0885368	ppp2r3a	chr2-25197587-25198525	7.27804	1.69347e-13	Superficial_Epithelial	Promoter	-123	ppp2r3a	chr2-25197587-25198525@ppp2r3a
0.0631426	ppp2r3a	chr2-25200204-25201047	5.67463	6.94934e-09	Superficial_Epithelial	Intron	1556	ppp2r3a	chr2-25200204-25201047@ppp2r3a
0.0509736	ppp2r3a	chr2-25241396-25243385	3.31108	0.000464686	Superficial_Epithelial	Intron	-1698	ppp2r3a	chr2-25241396-25243385@ppp2r3a
0.0871853	fndc3ba	chr2-25315408-25317143	1.95495	0.0252946	Superficial_Epithelial	Promoter	0	fndc3ba	chr2-25315408-25317143@fndc3ba
0.0598761	fndc3ba	chr2-25319873-25320406	1.84583	0.0324582	Superficial_Epithelial	Intron	4215	fndc3ba	chr2-25319873-25320406@fndc3ba
0.0538176	fndc3ba	chr2-25325688-25326199	2.70345	0.00343124	Superficial_Epithelial	Intron	10030	fndc3ba	chr2-25325688-25326199@fndc3ba
0.0572546	fndc3ba	chr2-25329699-25330304	1.94099	0.0261298	Superficial_Epithelial	Intron	14041	fndc3ba	chr2-25329699-25330304@fndc3ba
0.137007	fndc3ba	chr2-25340567-25341113	4.39544	5.52749e-06	Superficial_Epithelial	Intron	24909	fndc3ba	chr2-25340567-25341113@fndc3ba
0.0700935	fndc3ba	chr2-25343045-25343423	2.79099	0.00262735	Superficial_Epithelial	Intron	27387	fndc3ba	chr2-25343045-25343423@fndc3ba
0.109025	fndc3ba	chr2-25357430-25359329	2.64719	0.00405814	Superficial_Epithelial	Intron	-19128	fndc3ba	chr2-25357430-25359329@fndc3ba
0.101605	fndc3ba	chr2-25377820-25378817	2.51859	0.00589131	Superficial_Epithelial	Promoter	0	fndc3ba	chr2-25377820-25378817@fndc3ba
0.0733831	fndc3ba	chr2-25395505-25395989	3.48032	0.000250412	Superficial_Epithelial	Intron	17048	fndc3ba	chr2-25395505-25395989@fndc3ba
0.105493	fndc3ba	chr2-25398486-25399308	2.78764	0.00265464	Superficial_Epithelial	Intron	20029	fndc3ba	chr2-25398486-25399308@fndc3ba
0.067694	fndc3ba	chr2-25406063-25406597	2.3427	0.00957227	Superficial_Epithelial	Intron	27606	fndc3ba	chr2-25406063-25406597@fndc3ba
0.0962827	fndc3ba	chr2-25407862-25408392	2.48498	0.0064779	Superficial_Epithelial	Intron	29405	fndc3ba	chr2-25407862-25408392@fndc3ba
0.131946	fndc3ba	chr2-25411488-25412206	3.38327	0.000358145	Superficial_Epithelial	Intron	33031	fndc3ba	chr2-25411488-25412206@fndc3ba
0.0555298	pld1a	chr2-25560096-25562058	2.78264	0.00269594	Superficial_Epithelial	Promoter	0	pld1a	chr2-25560096-25562058@pld1a
0.064924	tnika	chr2-25640307-25640896	3.76476	8.3354e-05	Superficial_Epithelial	Intergenic	-17062	tnika	chr2-25640307-25640896@tnika
0.0539594	tnika	chr2-25648849-25649715	2.38312	0.00858331	Superficial_Epithelial	Intergenic	-8243	tnika	chr2-25648849-25649715@tnika
0.052652	tnika	chr2-25651429-25651711	3.05094	0.00114064	Superficial_Epithelial	Intergenic	-6247	tnika	chr2-25651429-25651711@tnika
0.0526158	tnika	chr2-25656050-25656829	2.3082	0.0104941	Superficial_Epithelial	Intergenic	-1129	tnika	chr2-25656050-25656829@tnika
0.0692367	tnika	chr2-25670751-25672602	4.11783	1.91231e-05	Superficial_Epithelial	Intron	12639	tnika	chr2-25670751-25672602@tnika
0.0508405	tnika	chr2-25677034-25678983	1.99593	0.0229706	Superficial_Epithelial	Intron	18922	tnika	chr2-25677034-25678983@tnika
0.0574061	tnika	chr2-25708330-25709007	4.08482	2.20556e-05	Superficial_Epithelial	Intron	50218	tnika	chr2-25708330-25709007@tnika
0.062853	tnika	chr2-25729382-25730896	3.1072	0.000944338	Superficial_Epithelial	Intron	71270	tnika	chr2-25729382-25730896@tnika
0.0501894	eif5a2	chr2-25743705-25744679	1.66897	0.0475618	Superficial_Epithelial	Intron	71862	NA	chr2-25743705-25744679@eif5a2
0.0674531	slc2a2	chr2-25822968-25823653	8.81304	6.08965e-19	Superficial_Epithelial	Exon	6125	slc2a2	chr2-25822968-25823653@slc2a2
0.050617	ptbp1a	chr2-26303157-26304667	3.6327	0.000140235	Superficial_Epithelial	Promoter	0	efna2a	chr2-26303157-26304667@ptbp1a
0.0635482	efna2a	chr2-26312243-26314273	6.05843	6.8728e-10	Superficial_Epithelial	Intron	8616	efna2a	chr2-26312243-26314273@efna2a
0.050304	rps8a	chr2-26548416-26549348	2.53047	0.00569542	Superficial_Epithelial	Exon	14630	LOC101883139	chr2-26548416-26549348@rps8a
0.071779	glis1a	chr2-26529807-26530582	10.5353	2.97042e-26	Superficial_Epithelial	Exon	-2077	si:ch211-106k21.5	chr2-26529807-26530582@glis1a
0.0700974	glis1a	chr2-26571297-26571881	10.4814	5.25737e-26	Superficial_Epithelial	Intergenic	7094	ndc1	chr2-26571297-26571881@glis1a
0.056256	tmem59	chr2-26616421-26616833	4.91975	4.33264e-07	Superficial_Epithelial	Intron	3970	tmem59	chr2-26616421-26616833@tmem59
0.069953	asph	chr2-26642065-26643345	2.17335	0.014877	Superficial_Epithelial	Promoter	0	u2surp	chr2-26642065-26643345@asph
0.059716	asph	chr2-26655228-26657071	1.6917	0.0453512	Superficial_Epithelial	Promoter	0	asph	chr2-26655228-26657071@asph
0.0566501	si:dkey-181m9.8	chr2-26714196-26714938	4.70306	1.28147e-06	Superficial_Epithelial	Exon	1060	si:dkey-181m9.8	chr2-26714196-26714938@si:dkey-181m9.8
0.051828	zswim5	chr2-27480866-27482413	3.9766	3.49537e-05	Superficial_Epithelial	Downstream (2-3kb)	2896	NA	chr2-27480866-27482413@zswim5
0.0545437	CABZ01056054.1	chr2-28304596-28304855	6.55442	2.79301e-11	Superficial_Epithelial	Intergenic	71197	NA	chr2-28304596-28304855@CABZ01056054.1
0.0554379	CABZ01056054.1	chr2-28381706-28382285	3.04832	0.00115062	Superficial_Epithelial	Downstream (2-3kb)	-5654	NA	chr2-28381706-28382285@CABZ01056054.1
0.052115	CABZ01056054.1	chr2-28389532-28390095	2.42979	0.00755377	Superficial_Epithelial	Intron	6898	NA	chr2-28389532-28390095@CABZ01056054.1
0.0924065	CABZ01056054.1	chr2-28405508-28406125	7.25718	1.97629e-13	Superficial_Epithelial	Intergenic	-8515	NA	chr2-28405508-28406125@CABZ01056054.1
0.0700786	CABZ01056054.1	chr2-28411170-28411845	4.10988	1.97929e-05	Superficial_Epithelial	Downstream (2-3kb)	8570	LOC101882566	chr2-28411170-28411845@CABZ01056054.1
0.0546844	CABZ01056052.1	chr2-28381706-28382285	3.36766	0.00037904	Superficial_Epithelial	Downstream (2-3kb)	-5654	NA	chr2-28381706-28382285@CABZ01056052.1
0.106905	CABZ01056052.1	chr2-28389532-28390095	6.43615	6.12695e-11	Superficial_Epithelial	Intron	6898	NA	chr2-28389532-28390095@CABZ01056052.1
0.361038	CABZ01056052.1	chr2-28405508-28406125	21.3382	2.50821e-101	Superficial_Epithelial	Intergenic	-8515	NA	chr2-28405508-28406125@CABZ01056052.1
0.0546325	CABZ01056052.1	chr2-28411170-28411845	2.06615	0.0194072	Superficial_Epithelial	Downstream (2-3kb)	8570	LOC101882566	chr2-28411170-28411845@CABZ01056052.1
0.0528058	mmp15b	chr2-28466791-28467062	4.84165	6.43812e-07	Superficial_Epithelial	Intron	13453	mmp15b	chr2-28466791-28467062@mmp15b
0.0560137	si:ch211-207d6.2	chr2-29845542-29846955	2.52476	0.00578884	Superficial_Epithelial	Promoter	0	si:ch211-207d6.2	chr2-29845542-29846955@si:ch211-207d6.2
0.0713734	en2b	chr2-30049651-30049912	8.96849	1.50304e-19	Superficial_Epithelial	Downstream (<1kb)	5520	shhb	chr2-30049651-30049912@en2b
0.0600296	lpin2	chr2-30965910-30966639	4.79503	8.13257e-07	Superficial_Epithelial	Intron	-2390	lpin2	chr2-30965910-30966639@lpin2
0.0538703	lpin2	chr2-30977095-30978955	4.02753	2.81829e-05	Superficial_Epithelial	Exon	8066	lpin2	chr2-30977095-30978955@lpin2
0.0773227	colec12	chr2-31404021-31404389	4.20475	1.30688e-05	Superficial_Epithelial	Intron	21431	colec12	chr2-31404021-31404389@colec12
0.0620548	colec12	chr2-31406825-31408040	3.42934	0.000302524	Superficial_Epithelial	Intron	24235	colec12	chr2-31406825-31408040@colec12
0.0714062	stam	chr2-31436958-31438558	3.06067	0.00110422	Superficial_Epithelial	Promoter	0	stam	chr2-31436958-31438558@stam
0.0580244	stam	chr2-31464379-31465119	2.78308	0.00269228	Superficial_Epithelial	Intergenic	9817	si:dkey-32m20.1	chr2-31464379-31465119@stam
0.0595324	mrc1b	chr2-31480915-31481271	4.24129	1.11118e-05	Superficial_Epithelial	Intron	4850	cacnb2b	chr2-31480915-31481271@mrc1b
0.0722346	retreg1	chr2-31855233-31855450	6.31912	1.31532e-10	Superficial_Epithelial	Downstream (<1kb)	4086	NA	chr2-31855233-31855450@retreg1
0.0536055	stard3nl	chr2-31845425-31847473	4.36854	6.25407e-06	Superficial_Epithelial	Exon	6983	stard3nl	chr2-31845425-31847473@stard3nl
0.0812327	asap1a	chr2-32329006-32329553	6.54264	3.02202e-11	Superficial_Epithelial	Intron	23393	asap1a	chr2-32329006-32329553@asap1a
0.0746464	puf60a	chr2-32660377-32661327	5.0121	2.69191e-07	Superficial_Epithelial	Exon	4847	puf60a	chr2-32660377-32661327@puf60a
0.13486	zgc:136930	chr2-32776496-32777230	11.3336	4.47083e-30	Superficial_Epithelial	Intergenic	-2908	zgc:136930	chr2-32776496-32777230@zgc:136930
0.0651212	zgc:136930	chr2-32779916-32780903	5.99369	1.02565e-09	Superficial_Epithelial	Promoter	0	zgc:136930	chr2-32779916-32780903@zgc:136930
0.0629548	ccr9a	chr2-32794384-32796153	5.01076	2.71071e-07	Superficial_Epithelial	Promoter	-720	ccr9a	chr2-32794384-32796153@ccr9a
0.0761231	ccr9a	chr2-32797557-32798367	6.33186	1.21111e-10	Superficial_Epithelial	Promoter	684	ccr9a	chr2-32797557-32798367@ccr9a
0.114318	ccr9a	chr2-32799361-32799979	10.9133	4.98041e-28	Superficial_Epithelial	Intergenic	2488	ccr9a	chr2-32799361-32799979@ccr9a
0.0580108	BX323807.2	chr2-32860397-32860836	7.12793	5.09447e-13	Superficial_Epithelial	Exon	-5751	NA	chr2-32860397-32860836@BX323807.2
0.0557946	rnf220a	chr2-33065642-33066390	4.95875	3.54737e-07	Superficial_Epithelial	Intron	13282	rnf220a	chr2-33065642-33066390@rnf220a
0.0852607	slc6a9	chr2-33382496-33383571	8.13206	2.11021e-16	Superficial_Epithelial	Promoter	0	slc6a9	chr2-33382496-33383571@slc6a9
0.0702959	zgc:113531	chr2-33425319-33425784	6.03051	8.17221e-10	Superficial_Epithelial	3' UTR	29380	ccdc24	chr2-33425319-33425784@zgc:113531
0.0808279	zgc:113531	chr2-33504275-33505037	6.11348	4.87406e-10	Superficial_Epithelial	Intron	-36891	NA	chr2-33504275-33505037@zgc:113531
0.118673	ptch2	chr2-33972689-33973948	4.82218	7.09997e-07	Superficial_Epithelial	Exon	19585	ptch2	chr2-33972689-33973948@ptch2
0.0710581	ptch2	chr2-34019033-34020263	3.32454	0.000442826	Superficial_Epithelial	Intron	-25397	ptch2	chr2-34019033-34020263@ptch2
0.0505138	tnn	chr2-35550998-35551452	3.42375	0.000308812	Superficial_Epithelial	Intron	15486	tnn	chr2-35550998-35551452@tnn
0.0737239	rasal2	chr2-35740103-35740732	5.27001	6.82072e-08	Superficial_Epithelial	Intron	-6351	NA	chr2-35740103-35740732@rasal2
0.0506276	rasal2	chr2-35744364-35745408	2.77362	0.0027718	Superficial_Epithelial	Intron	-10612	NA	chr2-35744364-35745408@rasal2
0.0678609	rasal2	chr2-35771232-35771977	3.83317	6.32523e-05	Superficial_Epithelial	Intron	-34695	rasal2	chr2-35771232-35771977@rasal2
0.0860939	rasal2	chr2-35773844-35774783	5.50516	1.84419e-08	Superficial_Epithelial	Intron	-31889	rasal2	chr2-35773844-35774783@rasal2
0.0524108	lamc1	chr2-35794032-35794437	1.74608	0.0403983	Superficial_Epithelial	Exon	-12235	rasal2	chr2-35794032-35794437@lamc1
0.0779641	lamc1	chr2-35880091-35881531	1.97252	0.0242752	Superficial_Epithelial	Promoter	0	lamc1	chr2-35880091-35881531@lamc1
0.13039	lamc1	chr2-35885674-35886469	3.83195	6.35662e-05	Superficial_Epithelial	Intron	5074	lamc1	chr2-35885674-35886469@lamc1
0.0762416	lamc1	chr2-35888395-35888835	3.33804	0.000421854	Superficial_Epithelial	Intron	7795	lamc1	chr2-35888395-35888835@lamc1
0.0634903	lamc1	chr2-35894109-35894615	1.81258	0.0349481	Superficial_Epithelial	Intron	13509	lamc1	chr2-35894109-35894615@lamc1
0.0842567	lamc1	chr2-35897150-35897787	2.52492	0.00578629	Superficial_Epithelial	Intron	16550	lamc1	chr2-35897150-35897787@lamc1
0.0702562	lamc1	chr2-35904507-35905174	2.50149	0.00618356	Superficial_Epithelial	Intron	23907	lamc1	chr2-35904507-35905174@lamc1
0.0725767	lamc1	chr2-35914117-35915106	1.67265	0.0471978	Superficial_Epithelial	Intron	33517	lamc1	chr2-35914117-35915106@lamc1
0.109183	lamc1	chr2-35918828-35919413	3.44985	0.000280453	Superficial_Epithelial	Intron	38228	lamc1	chr2-35918828-35919413@lamc1
0.0549739	lamc1	chr2-35920466-35920650	2.10595	0.0176043	Superficial_Epithelial	Intron	39866	lamc1	chr2-35920466-35920650@lamc1
0.102076	lamc1	chr2-35923444-35924929	2.73965	0.0030752	Superficial_Epithelial	Intron	42844	lamc1	chr2-35923444-35924929@lamc1
0.0832707	lamc1	chr2-35929214-35929696	3.76063	8.47441e-05	Superficial_Epithelial	Intron	48614	lamc1	chr2-35929214-35929696@lamc1
0.102421	lamc1	chr2-35936151-35936815	2.83331	0.00230341	Superficial_Epithelial	Intron	-54322	lamc2	chr2-35936151-35936815@lamc1
0.0782892	lamc1	chr2-35941386-35941859	3.50206	0.000230838	Superficial_Epithelial	Intron	-49278	lamc2	chr2-35941386-35941859@lamc1
0.0932143	lamc1	chr2-35945962-35946658	2.12503	0.0167919	Superficial_Epithelial	Exon	-44479	lamc2	chr2-35945962-35946658@lamc1
0.0593439	lamc1	chr2-35950882-35951207	3.16777	0.000768056	Superficial_Epithelial	Exon	-39930	lamc2	chr2-35950882-35951207@lamc1
0.11596	lamc1	chr2-35953336-35953931	3.19415	0.000701211	Superficial_Epithelial	Intron	-37206	lamc2	chr2-35953336-35953931@lamc1
0.0964267	lamc1	chr2-35958635-35958983	5.09996	1.69866e-07	Superficial_Epithelial	Intron	-32154	lamc2	chr2-35958635-35958983@lamc1
0.129633	lamc2	chr2-35897150-35897787	3.3698	0.000376116	Superficial_Epithelial	Intron	16550	lamc1	chr2-35897150-35897787@lamc2
0.0811136	lamc2	chr2-35899069-35900454	2.02723	0.0213193	Superficial_Epithelial	Intron	18469	lamc1	chr2-35899069-35900454@lamc2
0.075931	lamc2	chr2-35904507-35905174	2.37676	0.00873268	Superficial_Epithelial	Intron	23907	lamc1	chr2-35904507-35905174@lamc2
0.161556	lamc2	chr2-35914117-35915106	3.87855	5.25396e-05	Superficial_Epithelial	Intron	33517	lamc1	chr2-35914117-35915106@lamc2
0.0648371	lamc2	chr2-35916613-35917020	1.90383	0.0284661	Superficial_Epithelial	Intron	36013	lamc1	chr2-35916613-35917020@lamc2
0.110542	lamc2	chr2-35918828-35919413	3.33807	0.000421814	Superficial_Epithelial	Intron	38228	lamc1	chr2-35918828-35919413@lamc2
0.0957759	lamc2	chr2-35920466-35920650	4.79847	7.9942e-07	Superficial_Epithelial	Intron	39866	lamc1	chr2-35920466-35920650@lamc2
0.0648498	lamc2	chr2-35929214-35929696	2.62547	0.00432645	Superficial_Epithelial	Intron	48614	lamc1	chr2-35929214-35929696@lamc2
0.061977	lamc2	chr2-35934696-35935095	3.0806	0.0010329	Superficial_Epithelial	Intron	54096	lamc1	chr2-35934696-35935095@lamc2
0.128835	lamc2	chr2-35936151-35936815	3.49036	0.000241188	Superficial_Epithelial	Intron	-54322	lamc2	chr2-35936151-35936815@lamc2
0.102882	lamc2	chr2-35941386-35941859	3.93509	4.15824e-05	Superficial_Epithelial	Intron	-49278	lamc2	chr2-35941386-35941859@lamc2
0.10554	lamc2	chr2-35945962-35946658	2.78885	0.00264474	Superficial_Epithelial	Exon	-44479	lamc2	chr2-35945962-35946658@lamc2
0.059121	lamc2	chr2-35948560-35949059	1.91535	0.0277242	Superficial_Epithelial	Intron	-42078	lamc2	chr2-35948560-35949059@lamc2
0.0517158	lamc2	chr2-35950882-35951207	2.89853	0.00187458	Superficial_Epithelial	Exon	-39930	lamc2	chr2-35950882-35951207@lamc2
0.0862686	lamc2	chr2-35953336-35953931	1.75464	0.0396603	Superficial_Epithelial	Intron	-37206	lamc2	chr2-35953336-35953931@lamc2
0.0791571	lamc2	chr2-35958635-35958983	3.54977	0.000192782	Superficial_Epithelial	Intron	-32154	lamc2	chr2-35958635-35958983@lamc2
0.0730441	lamc2	chr2-35989937-35990680	1.68484	0.0460095	Superficial_Epithelial	Promoter	-457	lamc2	chr2-35989937-35990680@lamc2
0.109386	lamc2	chr2-35993116-35993582	3.22859	0.000622013	Superficial_Epithelial	Promoter	0	lamc2	chr2-35993116-35993582@lamc2
0.125043	lamc2	chr2-36003095-36003707	4.84079	6.46609e-07	Superficial_Epithelial	Promoter	-674	lamc2	chr2-36003095-36003707@lamc2
0.0899785	lamc2	chr2-36012295-36013958	1.8431	0.032657	Superficial_Epithelial	Exon	-1091	lamc2	chr2-36012295-36013958@lamc2
0.0565233	nmnat2	chr2-36007006-36007715	3.2147	0.000652904	Superficial_Epithelial	Promoter	0	lamc2	chr2-36007006-36007715@nmnat2
0.0697295	nmnat2	chr2-36012295-36013958	3.69096	0.000111706	Superficial_Epithelial	Exon	-1091	lamc2	chr2-36012295-36013958@nmnat2
0.0920655	nmnat2	chr2-36029244-36029443	7.87854	1.65609e-15	Superficial_Epithelial	Intron	11377	nmnat2	chr2-36029244-36029443@nmnat2
0.0729567	pak2a	chr2-36615836-36617854	2.92006	0.00174983	Superficial_Epithelial	Promoter	0	pak2a	chr2-36615836-36617854@pak2a
0.0663071	klhl6	chr2-36646130-36647192	4.13161	1.80115e-05	Superficial_Epithelial	Promoter	0	klhl6	chr2-36646130-36647192@klhl6
0.0645404	zgc:153654	chr2-36866315-36866792	5.17501	1.13948e-07	Superficial_Epithelial	Intron	3842	si:dkey-193b15.8	chr2-36866315-36866792@zgc:153654
0.052784	map1sb	chr2-36930561-36932419	4.05508	2.50583e-05	Superficial_Epithelial	Promoter	0	map1sb	chr2-36930561-36932419@map1sb
0.0707545	gadd45bb	chr2-36947412-36948642	6.55088	2.86001e-11	Superficial_Epithelial	Intergenic	7470	gadd45bb	chr2-36947412-36948642@gadd45bb
0.0538585	gng7	chr2-37041635-37041838	4.08843	2.17148e-05	Superficial_Epithelial	Intron	1702	gng7	chr2-37041635-37041838@gng7
0.0546131	skila	chr2-37331006-37332110	4.09022	2.15479e-05	Superficial_Epithelial	Intron	-18079	skila	chr2-37331006-37332110@skila
0.0503358	skila	chr2-37371583-37372271	3.92241	4.38329e-05	Superficial_Epithelial	Promoter	115	prkci	chr2-37371583-37372271@skila
0.0528473	insra	chr2-37629768-37630331	3.42419	0.000308322	Superficial_Epithelial	Intron	2565	insra	chr2-37629768-37630331@insra
0.0802091	MYADM.1	chr2-37677582-37677786	6.12881	4.42701e-10	Superficial_Epithelial	Intron	6855	mfsd14a2	chr2-37677582-37677786@MYADM.1
0.074333	nfatc4	chr2-37795068-37795669	6.63578	1.61392e-11	Superficial_Epithelial	Intron	1908	nfatc4	chr2-37795068-37795669@nfatc4
0.0642412	ltb4r2b	chr2-37796438-37797747	3.16619	0.000772239	Superficial_Epithelial	Promoter	0	nfatc4	chr2-37796438-37797747@ltb4r2b
0.0628685	ltb4r2b	chr2-37803394-37804937	3.85047	5.89447e-05	Superficial_Epithelial	Promoter	0	nfatc4	chr2-37803394-37804937@ltb4r2b
0.0585743	si:rp71-1g18.13	chr2-37985165-37986274	4.109	1.98684e-05	Superficial_Epithelial	Intron	10139	si:rp71-1g18.13	chr2-37985165-37986274@si:rp71-1g18.13
0.0547102	si:rp71-1g18.1	chr2-38011754-38012072	34.9703	3.18589e-268	Superficial_Epithelial	Exon	9037	dcaf8	chr2-38011754-38012072@si:rp71-1g18.1
0.0595384	mmp14b	chr2-38160459-38162149	1.69333	0.0451964	Superficial_Epithelial	Promoter	0	mmp14b	chr2-38160459-38162149@mmp14b
0.0767293	mmp14b	chr2-38163327-38164222	1.88269	0.0298709	Superficial_Epithelial	Intron	2009	mmp14b	chr2-38163327-38164222@mmp14b
0.102261	mmp14b	chr2-38189262-38190515	2.93082	0.00169034	Superficial_Epithelial	Intergenic	14278	acin1a	chr2-38189262-38190515@mmp14b
0.0539538	si:ch211-14a17.10	chr2-38174586-38175530	4.46134	4.07251e-06	Superficial_Epithelial	Exon	13268	mmp14b	chr2-38174586-38175530@si:ch211-14a17.10
0.0593932	homeza	chr2-38271115-38273205	2.85934	0.00212265	Superficial_Epithelial	Promoter	0	homeza	chr2-38271115-38273205@homeza
0.0606869	carmil3	chr2-38751923-38752335	6.38046	8.82758e-11	Superficial_Epithelial	Intron	9585	carmil3	chr2-38751923-38752335@carmil3
0.0545377	carmil3	chr2-38778356-38778595	7.24655	2.13754e-13	Superficial_Epithelial	Intron	-25628	carmil3	chr2-38778356-38778595@carmil3
0.135481	spsb4a	chr2-39674451-39676338	6.57989	2.35399e-11	Superficial_Epithelial	Promoter	0	spsb4a	chr2-39674451-39676338@spsb4a
0.0548195	spsb4a	chr2-39752292-39752751	1.95218	0.0254581	Superficial_Epithelial	Promoter	0	slc25a36a	chr2-39752292-39752751@spsb4a
0.0722551	epha4a	chr2-40045219-40046151	2.86032	0.00211607	Superficial_Epithelial	Intergenic	-10748	NA	chr2-40045219-40046151@epha4a
0.0749371	epha4a	chr2-40087407-40088755	2.99228	0.0013845	Superficial_Epithelial	Exon	-17555	epha4a	chr2-40087407-40088755@epha4a
0.0951329	epha4a	chr2-40094054-40095156	1.83418	0.0333135	Superficial_Epithelial	Exon	-24202	epha4a	chr2-40094054-40095156@epha4a
0.180591	epha4a	chr2-40096480-40097874	5.38439	3.63447e-08	Superficial_Epithelial	Intron	-26628	epha4a	chr2-40096480-40097874@epha4a
0.0842665	epha4a	chr2-40117203-40119140	1.89315	0.0291687	Superficial_Epithelial	Intron	16802	epha4a	chr2-40117203-40119140@epha4a
0.0542962	epha4a	chr2-40120594-40121446	1.75359	0.0397506	Superficial_Epithelial	Intron	14496	epha4a	chr2-40120594-40121446@epha4a
0.0965111	epha4a	chr2-40134513-40135088	2.31945	0.0101854	Superficial_Epithelial	Promoter	854	epha4a	chr2-40134513-40135088@epha4a
0.126331	epha4a	chr2-40135565-40136696	3.07196	0.0010633	Superficial_Epithelial	Promoter	0	epha4a	chr2-40135565-40136696@epha4a
0.0526593	SSBP4	chr2-41671619-41672511	2.86166	0.00210712	Superficial_Epithelial	Intron	50654	zgc:110158	chr2-41671619-41672511@SSBP4
0.053038	SSBP4	chr2-41722482-41723656	2.49575	0.00628461	Superficial_Epithelial	Promoter	0	zgc:110158	chr2-41722482-41723656@SSBP4
0.0565927	SSBP4	chr2-41799040-41800061	2.69563	0.00351283	Superficial_Epithelial	Intergenic	60979	keap1a	chr2-41799040-41800061@SSBP4
0.054703	SSBP4	chr2-41822344-41823333	2.82482	0.00236539	Superficial_Epithelial	Intergenic	37707	keap1a	chr2-41822344-41823333@SSBP4
0.0757345	crlf1a	chr2-41799040-41800061	3.89161	4.97905e-05	Superficial_Epithelial	Intergenic	60979	keap1a	chr2-41799040-41800061@crlf1a
0.0944771	keap1a	chr2-41828303-41829647	7.64478	1.04648e-14	Superficial_Epithelial	Intergenic	31393	keap1a	chr2-41828303-41829647@keap1a
0.056887	crlf1a	chr2-41828303-41829647	2.62486	0.00433427	Superficial_Epithelial	Intergenic	31393	keap1a	chr2-41828303-41829647@crlf1a
0.0523106	keap1a	chr2-41833395-41833947	4.63561	1.77942e-06	Superficial_Epithelial	Downstream (1-2kb)	27093	keap1a	chr2-41833395-41833947@keap1a
0.0524361	crlf1a	chr2-41866679-41869000	2.57758	0.00497473	Superficial_Epithelial	Intergenic	-5639	keap1a	chr2-41866679-41869000@crlf1a
0.0723164	gbp1	chr2-42034077-42036757	5.30051	5.77406e-08	Superficial_Epithelial	Promoter	0	gbp1	chr2-42034077-42036757@gbp1
0.0545642	gbp1	chr2-42042342-42043300	3.6709	0.000120847	Superficial_Epithelial	Exon	-7035	gbp1	chr2-42042342-42043300@gbp1
0.05921	cyp7b1	chr2-42143529-42144240	4.12583	1.84701e-05	Superficial_Epithelial	Exon	7810	cyp7b1	chr2-42143529-42144240@cyp7b1
0.0857014	si:ch211-235o23.1	chr2-42209824-42211116	7.91162	1.27033e-15	Superficial_Epithelial	3' UTR	-1832	si:ch211-235o23.1	chr2-42209824-42211116@si:ch211-235o23.1
0.0566452	si:ch211-235o23.1	chr2-42212693-42213365	5.53933	1.51814e-08	Superficial_Epithelial	Promoter	0	si:ch211-235o23.1	chr2-42212693-42213365@si:ch211-235o23.1
0.0608903	si:ch211-235o23.1	chr2-42213760-42214519	6.88003	2.99205e-12	Superficial_Epithelial	Promoter	812	si:ch211-235o23.1	chr2-42213760-42214519@si:ch211-235o23.1
0.0637558	esyt2a	chr2-42414781-42418704	4.55391	2.63295e-06	Superficial_Epithelial	Promoter	0	slco5a1a	chr2-42414781-42418704@esyt2a
0.050126	esyt2a	chr2-42435665-42436358	4.12293	1.8704e-05	Superficial_Epithelial	Intron	3129	esyt2a	chr2-42435665-42436358@esyt2a
0.0811872	myo10	chr2-42665227-42666591	2.24903	0.0122553	Superficial_Epithelial	Intron	-37199	myo10	chr2-42665227-42666591@myo10
0.0795272	myo10	chr2-42669100-42669872	3.4429	0.00028776	Superficial_Epithelial	Intron	34991	myo10	chr2-42669100-42669872@myo10
0.0995569	myo10	chr2-42672469-42673273	3.18188	0.0007316	Superficial_Epithelial	3' UTR	31590	myo10	chr2-42672469-42673273@myo10
0.0522586	myo10	chr2-42694995-42695419	2.00586	0.0224356	Superficial_Epithelial	Intron	9444	myo10	chr2-42694995-42695419@myo10
0.0805328	myo10	chr2-42701031-42701544	2.36926	0.00891196	Superficial_Epithelial	Intron	3319	myo10	chr2-42701031-42701544@myo10
0.0606142	myo10	chr2-42704495-42705341	2.57406	0.00502565	Superficial_Epithelial	Promoter	0	myo10	chr2-42704495-42705341@myo10
0.0902426	adcy8	chr2-42829828-42831549	4.48756	3.60223e-06	Superficial_Epithelial	Intron	-2492	adcy8	chr2-42829828-42831549@adcy8
0.0591227	efr3a	chr2-42829828-42831549	2.53283	0.00565732	Superficial_Epithelial	Intron	-2492	adcy8	chr2-42829828-42831549@efr3a
0.0631198	adcy8	chr2-42847231-42848143	2.34526	0.00950692	Superficial_Epithelial	Intron	-3434	adcy8	chr2-42847231-42848143@adcy8
0.0614354	adcy8	chr2-42933129-42933418	4.26985	9.78011e-06	Superficial_Epithelial	Intron	24695	oc90	chr2-42933129-42933418@adcy8
0.0500508	efr3a	chr2-42874537-42875598	1.64527	0.0499573	Superficial_Epithelial	Intron	1876	efr3a	chr2-42874537-42875598@efr3a
0.0521034	efr3a	chr2-42885414-42886659	1.96722	0.0245788	Superficial_Epithelial	Exon	12753	efr3a	chr2-42885414-42886659@efr3a
0.0817115	pard3ab	chr2-43147913-43149287	3.39892	0.00033826	Superficial_Epithelial	Intron	2071	ftr15	chr2-43147913-43149287@pard3ab
0.0567886	crema	chr2-43150247-43152369	4.76655	9.37038e-07	Superficial_Epithelial	Promoter	0	ftr15	chr2-43150247-43152369@crema
0.0599683	pard3ab	chr2-43165357-43166039	2.05365	0.020005	Superficial_Epithelial	Intron	2253	crema	chr2-43165357-43166039@pard3ab
0.0757365	pard3ab	chr2-43195703-43197089	2.10093	0.0178235	Superficial_Epithelial	Promoter	0	crema	chr2-43195703-43197089@pard3ab
0.0741747	pard3ab	chr2-43204721-43206713	2.59981	0.00466379	Superficial_Epithelial	Promoter	0	pard3ab	chr2-43204721-43206713@pard3ab
0.0562946	pard3ab	chr2-43241488-43242148	1.96274	0.0248384	Superficial_Epithelial	Intron	36467	pard3ab	chr2-43241488-43242148@pard3ab
0.0735422	pard3ab	chr2-43249778-43250595	2.27544	0.0114398	Superficial_Epithelial	Intron	-29006	pard3ab	chr2-43249778-43250595@pard3ab
0.0629835	pard3ab	chr2-43252779-43253562	1.87503	0.0303944	Superficial_Epithelial	Intron	-26039	pard3ab	chr2-43252779-43253562@pard3ab
0.0526405	nrp1b	chr2-43567385-43567593	4.967	3.39981e-07	Superficial_Epithelial	Intergenic	16303	itgb1b	chr2-43567385-43567593@nrp1b
0.0505802	CABZ01058721.1	chr2-43468952-43469903	1.90814	0.0281864	Superficial_Epithelial	Promoter	0	nrp1b	chr2-43468952-43469903@CABZ01058721.1
0.0671377	itgb1b	chr2-43485935-43486743	1.80372	0.0356376	Superficial_Epithelial	Intron	16694	nrp1b	chr2-43485935-43486743@itgb1b
0.0616478	itgb1b	chr2-43496449-43497719	1.79179	0.0365834	Superficial_Epithelial	Intron	19299	NA	chr2-43496449-43497719@itgb1b
0.0851794	itgb1b	chr2-43505758-43506628	1.95506	0.0252881	Superficial_Epithelial	Exon	10390	NA	chr2-43505758-43506628@itgb1b
0.0537934	CABZ01058721.1	chr2-43542892-43544081	1.91341	0.0278477	Superficial_Epithelial	Intron	1261	LOC110437890	chr2-43542892-43544081@CABZ01058721.1
0.0848984	itgb1b	chr2-43542892-43544081	2.23347	0.0127589	Superficial_Epithelial	Intron	1261	LOC110437890	chr2-43542892-43544081@itgb1b
0.0560415	CABZ01058721.1	chr2-43552774-43554117	1.83796	0.0330342	Superficial_Epithelial	Intergenic	-7432	LOC110437890	chr2-43552774-43554117@CABZ01058721.1
0.0680942	CABZ01058721.1	chr2-43558864-43559661	2.71648	0.003299	Superficial_Epithelial	Intergenic	-13522	LOC110437890	chr2-43558864-43559661@CABZ01058721.1
0.058212	CABZ01058721.1	chr2-43565851-43566553	2.85839	0.00212896	Superficial_Epithelial	Intergenic	17343	itgb1b	chr2-43565851-43566553@CABZ01058721.1
0.111851	CABZ01058721.1	chr2-43570596-43571770	5.13765	1.39098e-07	Superficial_Epithelial	Intergenic	12126	itgb1b	chr2-43570596-43571770@CABZ01058721.1
0.0593464	CABZ01058721.1	chr2-43573282-43573619	2.76349	0.00285936	Superficial_Epithelial	Intergenic	10277	itgb1b	chr2-43573282-43573619@CABZ01058721.1
0.0759965	CABZ01058721.1	chr2-43574877-43575201	3.31225	0.000462749	Superficial_Epithelial	Downstream (2-3kb)	8695	itgb1b	chr2-43574877-43575201@CABZ01058721.1
0.0588633	itgb1b	chr2-43551245-43551532	3.34364	0.000413438	Superficial_Epithelial	Intergenic	-5903	LOC110437890	chr2-43551245-43551532@itgb1b
0.105151	itgb1b.1	chr2-43552774-43554117	5.25759	7.2977e-08	Superficial_Epithelial	Intergenic	-7432	LOC110437890	chr2-43552774-43554117@itgb1b.1
0.0606717	itgb1b.2	chr2-43552774-43554117	3.11114	0.000931834	Superficial_Epithelial	Intergenic	-7432	LOC110437890	chr2-43552774-43554117@itgb1b.2
0.142443	itgb1b	chr2-43558864-43559661	4.06263	2.42613e-05	Superficial_Epithelial	Intergenic	-13522	LOC110437890	chr2-43558864-43559661@itgb1b
0.0851019	itgb1b	chr2-43565851-43566553	2.85388	0.00215944	Superficial_Epithelial	Intergenic	17343	itgb1b	chr2-43565851-43566553@itgb1b
0.0637536	itgb1b.1	chr2-43567385-43567593	4.03107	2.77617e-05	Superficial_Epithelial	Intergenic	16303	itgb1b	chr2-43567385-43567593@itgb1b.1
0.105901	itgb1b	chr2-43570596-43571770	3.16523	0.000774814	Superficial_Epithelial	Intergenic	12126	itgb1b	chr2-43570596-43571770@itgb1b
0.0596761	itgb1b.1	chr2-43570596-43571770	2.102	0.0177767	Superficial_Epithelial	Intergenic	12126	itgb1b	chr2-43570596-43571770@itgb1b.1
0.111261	itgb1b	chr2-43574877-43575201	3.89331	4.94431e-05	Superficial_Epithelial	Downstream (2-3kb)	8695	itgb1b	chr2-43574877-43575201@itgb1b
0.078396	itgb1b	chr2-43604181-43606130	2.32574	0.0100161	Superficial_Epithelial	Promoter	0	epc1b	chr2-43604181-43606130@itgb1b
0.0950559	itgb1b	chr2-43632042-43632864	3.25608	0.000564817	Superficial_Epithelial	Exon	2913	itgb1b.1	chr2-43632042-43632864@itgb1b
0.0618127	itgb1b	chr2-43649989-43650191	3.65089	0.000130664	Superficial_Epithelial	Exon	2824	itgb1b.2	chr2-43649989-43650191@itgb1b
0.0862223	itgb1b	chr2-43652233-43654189	2.52128	0.00584637	Superficial_Epithelial	Promoter	0	itgb1b.2	chr2-43652233-43654189@itgb1b
0.0508059	itgb1b.2	chr2-43604181-43606130	2.84466	0.00222294	Superficial_Epithelial	Promoter	0	epc1b	chr2-43604181-43606130@itgb1b.2
0.0556406	itgb1b.1	chr2-43634857-43636766	2.33848	0.00968112	Superficial_Epithelial	Promoter	0	itgb1b.1	chr2-43634857-43636766@itgb1b.1
0.0911461	itgb1b.1	chr2-43649989-43650191	5.36175	4.12096e-08	Superficial_Epithelial	Exon	2824	itgb1b.2	chr2-43649989-43650191@itgb1b.1
0.056923	itgb1b.2	chr2-43634857-43636766	3.15591	0.00079999	Superficial_Epithelial	Promoter	0	itgb1b.1	chr2-43634857-43636766@itgb1b.2
0.0900754	itgb1b.2	chr2-43649989-43650191	7.39764	6.93111e-14	Superficial_Epithelial	Exon	2824	itgb1b.2	chr2-43649989-43650191@itgb1b.2
0.071996	itgb1b.2	chr2-43652233-43654189	3.49401	0.000237908	Superficial_Epithelial	Promoter	0	itgb1b.2	chr2-43652233-43654189@itgb1b.2
0.0504501	itgb1b.2	chr2-43690490-43690950	2.88098	0.00198222	Superficial_Epithelial	Intron	7581	LOC103910107	chr2-43690490-43690950@itgb1b.2
0.0564174	itgb1b.2	chr2-43725673-43726342	2.90531	0.00183443	Superficial_Epithelial	Exon	13217	kif5ba	chr2-43725673-43726342@itgb1b.2
0.0572816	si:ch211-195h23.3	chr2-43935982-43937007	4.67818	1.44717e-06	Superficial_Epithelial	Intron	5588	NA	chr2-43935982-43937007@si:ch211-195h23.3
0.0618945	si:ch211-195h23.4	chr2-43957312-43958067	4.96195	3.48943e-07	Superficial_Epithelial	Intergenic	-14717	NA	chr2-43957312-43958067@si:ch211-195h23.4
0.169181	zgc:152670	chr2-44346114-44347453	8.97379	1.43239e-19	Superficial_Epithelial	Intergenic	-1020	zgc:152670	chr2-44346114-44347453@zgc:152670
0.0960835	zgc:152670	chr2-44353370-44353814	7.53391	2.46212e-14	Superficial_Epithelial	Promoter	697	zgc:152670	chr2-44353370-44353814@zgc:152670
0.0803963	zgc:152670	chr2-44360171-44360908	4.7733	9.06164e-07	Superficial_Epithelial	Promoter	-58	zgc:152670	chr2-44360171-44360908@zgc:152670
0.197239	zgc:152670	chr2-44362499-44363600	10.2149	8.50379e-25	Superficial_Epithelial	3' UTR	1533	zgc:152670	chr2-44362499-44363600@zgc:152670
0.0891399	camk2n1a	chr2-44908679-44909130	5.70315	5.88076e-09	Superficial_Epithelial	Intron	-14669	NA	chr2-44908679-44909130@camk2n1a
0.0704625	camk2n1a	chr2-44945545-44946273	3.96969	3.59832e-05	Superficial_Epithelial	Promoter	0	camk2n1a	chr2-44945545-44946273@camk2n1a
0.0976215	capn10	chr2-45179678-45179948	8.33399	3.90826e-17	Superficial_Epithelial	Intron	-11101	ccl20a.3	chr2-45179678-45179948@capn10
0.0828142	ccl20a.3	chr2-45190716-45191254	11.5838	2.48938e-31	Superficial_Epithelial	Promoter	0	ccl20a.3	chr2-45190716-45191254@ccl20a.3
0.072707	camsap2b	chr2-45296111-45296979	3.09819	0.000973519	Superficial_Epithelial	Intergenic	-3533	NA	chr2-45296111-45296979@camsap2b
0.0576797	camsap2b	chr2-45299811-45300722	2.4117	0.00793925	Superficial_Epithelial	Promoter	0	NA	chr2-45299811-45300722@camsap2b
0.0537978	camsap2b	chr2-45310989-45312074	1.66571	0.0478852	Superficial_Epithelial	Intron	10477	NA	chr2-45310989-45312074@camsap2b
0.052945	si:ch211-66k16.28	chr2-45509298-45511236	2.35845	0.00917561	Superficial_Epithelial	Promoter	0	gpsm2	chr2-45509298-45511236@si:ch211-66k16.28
0.0525794	si:ch211-66k16.28	chr2-45512927-45513295	2.20115	0.0138626	Superficial_Epithelial	Intron	1468	NA	chr2-45512927-45513295@si:ch211-66k16.28
0.0564347	gpsm2	chr2-45504438-45504688	2.24605	0.0123505	Superficial_Epithelial	Promoter	110	gpsm2	chr2-45504438-45504688@gpsm2
0.144531	gpsm2	chr2-45509298-45511236	3.9874	3.34009e-05	Superficial_Epithelial	Promoter	0	gpsm2	chr2-45509298-45511236@gpsm2
0.110773	gpsm2	chr2-45512927-45513295	3.17294	0.00075453	Superficial_Epithelial	Intron	1468	NA	chr2-45512927-45513295@gpsm2
0.123228	gpc1b	chr2-46025620-46026075	4.46599	3.98502e-06	Superficial_Epithelial	Intergenic	-6603	gpc1b	chr2-46025620-46026075@gpc1b
0.0837528	gpc1b	chr2-46032324-46033034	2.80442	0.00252037	Superficial_Epithelial	Promoter	0	gpc1b	chr2-46032324-46033034@gpc1b
0.117179	gpc1b	chr2-46033917-46034930	3.05816	0.0011135	Superficial_Epithelial	Intron	1239	gpc1b	chr2-46033917-46034930@gpc1b
0.155141	gpc1b	chr2-46038204-46038799	5.24158	7.96029e-08	Superficial_Epithelial	Intron	5526	gpc1b	chr2-46038204-46038799@gpc1b
0.110531	gpc1b	chr2-46069886-46070643	2.98294	0.00142748	Superficial_Epithelial	Intron	37208	gpc1b	chr2-46069886-46070643@gpc1b
0.14645	gpc1b	chr2-46081911-46082580	4.20357	1.3137e-05	Superficial_Epithelial	Intron	49233	gpc1b	chr2-46081911-46082580@gpc1b
0.0719228	gpc1b	chr2-46088201-46088405	3.67189	0.000120381	Superficial_Epithelial	Intron	55523	gpc1b	chr2-46088201-46088405@gpc1b
0.0763875	gpc1b	chr2-46089945-46090249	2.55232	0.00535034	Superficial_Epithelial	Intron	57267	gpc1b	chr2-46089945-46090249@gpc1b
0.160268	gpc1b	chr2-46095526-46096829	4.29967	8.55274e-06	Superficial_Epithelial	Intron	62848	gpc1b	chr2-46095526-46096829@gpc1b
0.0772641	gpc1b	chr2-46098992-46099395	3.28017	0.000518727	Superficial_Epithelial	Intron	66314	gpc1b	chr2-46098992-46099395@gpc1b
0.103154	gpc1b	chr2-46106652-46107281	3.21044	0.000662662	Superficial_Epithelial	Intron	73974	gpc1b	chr2-46106652-46107281@gpc1b
0.0945812	gpc1b	chr2-46122461-46123081	2.3615	0.00910068	Superficial_Epithelial	Intron	89783	gpc1b	chr2-46122461-46123081@gpc1b
0.0573605	si:ch211-165b10.3	chr2-47623411-47623771	6.88766	2.83597e-12	Superficial_Epithelial	Promoter	209	si:ch211-165b10.3	chr2-47623411-47623771@si:ch211-165b10.3
0.05579	mbnl1	chr2-47697184-47697737	3.94925	3.91982e-05	Superficial_Epithelial	Intergenic	-11116	mbnl1	chr2-47697184-47697737@mbnl1
0.0537848	mbnl1	chr2-47739303-47741166	3.97273	3.55274e-05	Superficial_Epithelial	Intron	-12883	mbnl1	chr2-47739303-47741166@mbnl1
0.0851777	itm2cb	chr2-48212486-48212695	7.78739	3.42046e-15	Superficial_Epithelial	Intron	-16394	snorc	chr2-48212486-48212695@itm2cb
0.0598981	per2	chr2-48374377-48376206	4.07655	2.28542e-05	Superficial_Epithelial	Promoter	0	per2	chr2-48374377-48376206@per2
0.0975604	rorcb	chr2-49432146-49432536	12.33	3.12236e-35	Superficial_Epithelial	5' UTR	14246	rorcb	chr2-49432146-49432536@rorcb
0.0775805	sh3gl1a	chr2-49432146-49432536	7.91945	1.19286e-15	Superficial_Epithelial	5' UTR	14246	rorcb	chr2-49432146-49432536@sh3gl1a
0.0507426	sema4e	chr2-49602921-49603470	5.14635	1.32803e-07	Superficial_Epithelial	Exon	22471	sema4e	chr2-49602921-49603470@sema4e
0.0532268	zcchc2	chr2-50097663-50098854	2.76853	0.00281549	Superficial_Epithelial	Intron	2790	zcchc2	chr2-50097663-50098854@zcchc2
0.051663	adcyap1r1a.1	chr2-50772101-50772279	6.63938	1.57498e-11	Superficial_Epithelial	Intergenic	33776	fyco1b	chr2-50772101-50772279@adcyap1r1a.1
0.0556741	ghrhra	chr2-50936768-50937052	7.82975	2.44425e-15	Superficial_Epithelial	Exon	29072	ghrhra	chr2-50936768-50937052@ghrhra
0.050367	ftr87	chr2-51059039-51059942	5.79813	3.35302e-09	Superficial_Epithelial	Promoter	0	ftr87	chr2-51059039-51059942@ftr87
0.0580204	ftr87	chr2-51136158-51136672	5.23018	8.46737e-08	Superficial_Epithelial	Intergenic	-26682	them6	chr2-51136158-51136672@ftr87
0.0574769	dad1	chr2-51728895-51729879	2.598	0.00468841	Superficial_Epithelial	Intergenic	-9456	tgm1l1	chr2-51728895-51729879@dad1
0.0722919	tgm1l1	chr2-51644810-51645728	2.20835	0.0136099	Superficial_Epithelial	Promoter	0	abhd4	chr2-51644810-51645728@tgm1l1
0.0555319	tgm1l1	chr2-51647533-51648541	1.95703	0.0251721	Superficial_Epithelial	Exon	2369	abhd4	chr2-51647533-51648541@tgm1l1
0.0550966	tgm1l1	chr2-51659074-51659530	2.9884	0.00140221	Superficial_Epithelial	Intergenic	13910	abhd4	chr2-51659074-51659530@tgm1l1
0.0967276	tgm1l1	chr2-51667827-51670096	3.87563	5.31752e-05	Superficial_Epithelial	3' UTR	22663	abhd4	chr2-51667827-51670096@tgm1l1
0.066661	tgm1l1	chr2-51671642-51673082	2.1753	0.0148039	Superficial_Epithelial	Exon	26478	abhd4	chr2-51671642-51673082@tgm1l1
0.11575	tgm1l1	chr2-51696963-51698027	4.18054	1.45411e-05	Superficial_Epithelial	Intron	2682	tgm1l1	chr2-51696963-51698027@tgm1l1
0.0703576	tgm1l1	chr2-51702092-51702576	3.45436	0.000275801	Superficial_Epithelial	Intron	-1383	tgm1l1	chr2-51702092-51702576@tgm1l1
0.0534413	tgm1l1	chr2-51705913-51706165	4.05174	2.54195e-05	Superficial_Epithelial	Intron	-5204	tgm1l1	chr2-51705913-51706165@tgm1l1
0.0812326	tgm1l1	chr2-51706967-51708526	2.60201	0.00463392	Superficial_Epithelial	Intron	-6258	tgm1l1	chr2-51706967-51708526@tgm1l1
0.12913	tgm1l1	chr2-51713813-51715142	5.41244	3.10867e-08	Superficial_Epithelial	Intron	4297	tgm1l1	chr2-51713813-51715142@tgm1l1
0.0755325	tgm1l1	chr2-51716518-51717080	3.51041	0.000223712	Superficial_Epithelial	Intron	2359	tgm1l1	chr2-51716518-51717080@tgm1l1
0.127073	tgm1l1	chr2-51718468-51720642	5.37557	3.81709e-08	Superficial_Epithelial	Promoter	0	tgm1l1	chr2-51718468-51720642@tgm1l1
0.106529	tgm1l1	chr2-51726278-51726950	5.25398	7.44236e-08	Superficial_Epithelial	Intergenic	-6839	tgm1l1	chr2-51726278-51726950@tgm1l1
0.17552	tgm1l1	chr2-51728895-51729879	7.60526	1.42169e-14	Superficial_Epithelial	Intergenic	-9456	tgm1l1	chr2-51728895-51729879@tgm1l1
0.0578287	tgm1l1	chr2-51741422-51742686	1.7403	0.0409031	Superficial_Epithelial	Promoter	0	LOC566646	chr2-51741422-51742686@tgm1l1
0.0534881	tgm1l1	chr2-51744358-51745102	1.89083	0.0293233	Superficial_Epithelial	Intron	-2645	LOC566646	chr2-51744358-51745102@tgm1l1
0.0980503	tgm1l1	chr2-51779776-51780607	3.745	9.01952e-05	Superficial_Epithelial	Intergenic	-2513	crygn1	chr2-51779776-51780607@tgm1l1
0.0629684	BX908782.2	chr2-51758145-51758400	4.96788	3.38439e-07	Superficial_Epithelial	Promoter	-817	LOC566646	chr2-51758145-51758400@BX908782.2
0.0955063	BX908782.2	chr2-51772020-51773097	6.07574	6.17073e-10	Superficial_Epithelial	Promoter	0	LOC103910140	chr2-51772020-51773097@BX908782.2
0.077852	BX908782.2	chr2-51779776-51780607	4.70479	1.27065e-06	Superficial_Epithelial	Intergenic	-2513	crygn1	chr2-51779776-51780607@BX908782.2
0.0518628	theg	chr2-52153743-52155290	4.65803	1.59625e-06	Superficial_Epithelial	Promoter	0	NA	chr2-52153743-52155290@theg
0.0524197	theg	chr2-52195022-52195745	5.2262	8.65158e-08	Superficial_Epithelial	Intron	-36885	plpp2a	chr2-52195022-52195745@theg
0.0787891	CABZ01040021.1	chr2-52153743-52155290	4.327	7.55767e-06	Superficial_Epithelial	Promoter	0	NA	chr2-52153743-52155290@CABZ01040021.1
0.0556837	CABZ01040021.1	chr2-52244769-52245582	2.59644	0.00470975	Superficial_Epithelial	Intron	12139	plpp2a	chr2-52244769-52245582@CABZ01040021.1
0.0663906	plpp2a	chr2-52232527-52233298	4.30469	8.36091e-06	Superficial_Epithelial	Promoter	0	plpp2a	chr2-52232527-52233298@plpp2a
0.0568663	plpp2a	chr2-52244769-52245582	3.25822	0.000560563	Superficial_Epithelial	Intron	12139	plpp2a	chr2-52244769-52245582@plpp2a
0.052495	plpp2a	chr2-52286790-52288716	2.94346	0.00162282	Superficial_Epithelial	Intron	54160	plpp2a	chr2-52286790-52288716@plpp2a
0.0736866	hsd11b1lb	chr2-53475256-53477108	4.21691	1.23838e-05	Superficial_Epithelial	Intron	4804	hsd11b1lb	chr2-53475256-53477108@hsd11b1lb
0.112103	hsd11b1lb	chr2-53479827-53480288	7.1651	3.88655e-13	Superficial_Epithelial	Intron	1624	hsd11b1lb	chr2-53479827-53480288@hsd11b1lb
0.0566291	CABZ01050280.1	chr2-54452947-54453698	6.83774	4.02262e-12	Superficial_Epithelial	Intergenic	22315	NA	chr2-54452947-54453698@CABZ01050280.1
0.0697556	mtcl1	chr2-54430212-54431324	6.74232	7.79386e-12	Superficial_Epithelial	Promoter	0	NA	chr2-54430212-54431324@mtcl1
0.0915201	mtcl1	chr2-54452947-54453698	9.48362	1.22801e-21	Superficial_Epithelial	Intergenic	22315	NA	chr2-54452947-54453698@mtcl1
0.0797669	mtcl1	chr2-54475520-54476076	8.64636	2.65847e-18	Superficial_Epithelial	Intergenic	-6527	NA	chr2-54475520-54476076@mtcl1
0.0766815	twsg1a	chr2-54808623-54809771	3.05701	0.00111777	Superficial_Epithelial	Intron	4238	twsg1a	chr2-54808623-54809771@twsg1a
0.0546933	twsg1a	chr2-54823941-54824832	1.97577	0.0240906	Superficial_Epithelial	Intron	-2559	twsg1a	chr2-54823941-54824832@twsg1a
0.0579414	ap1m1	chr2-55429535-55431094	2.83895	0.00226313	Superficial_Epithelial	Promoter	0	ap1m1	chr2-55429535-55431094@ap1m1
0.0547801	klf2b	chr2-55620671-55621094	5.64326	8.34283e-09	Superficial_Epithelial	Intergenic	-44001	klf2b	chr2-55620671-55621094@klf2b
0.0626105	klf2b	chr2-55623581-55624581	6.25066	2.04363e-10	Superficial_Epithelial	Intergenic	-40514	klf2b	chr2-55623581-55624581@klf2b
0.0895288	klf2b	chr2-55669838-55671781	9.36992	3.62952e-21	Superficial_Epithelial	3' UTR	4515	klf2b	chr2-55669838-55671781@klf2b
0.0514685	calr3b	chr2-55781568-55781818	2.67167	0.00377377	Superficial_Epithelial	Downstream (2-3kb)	-1641	eps15l1b	chr2-55781568-55781818@calr3b
0.0831209	calr3b	chr2-55795995-55797882	2.50704	0.0060874	Superficial_Epithelial	Promoter	0	calr3b	chr2-55795995-55797882@calr3b
0.0738443	si:ch211-178n15.1	chr2-56058080-56058971	3.31603	0.00045653	Superficial_Epithelial	Downstream (1-2kb)	-15450	NA	chr2-56058080-56058971@si:ch211-178n15.1
0.0794589	si:ch211-178n15.1	chr2-56077206-56077839	4.1129	1.95362e-05	Superficial_Epithelial	Intron	17436	si:ch211-178n15.1	chr2-56077206-56077839@si:ch211-178n15.1
0.0586809	si:ch211-178n15.1	chr2-56094104-56095672	2.79144	0.00262368	Superficial_Epithelial	Promoter	0	si:ch211-178n15.1	chr2-56094104-56095672@si:ch211-178n15.1
0.0600074	si:ch211-178n15.1	chr2-56098268-56099379	2.70085	0.00345812	Superficial_Epithelial	Intergenic	-2993	si:ch211-178n15.1	chr2-56098268-56099379@si:ch211-178n15.1
0.0566429	rab11bb	chr2-56526007-56526171	6.58958	2.20543e-11	Superficial_Epithelial	Intron	28113	NA	chr2-56526007-56526171@rab11bb
0.0561044	tcf3a	chr2-57301953-57302656	3.655	0.00012859	Superficial_Epithelial	Intergenic	-14695	si:ch1073-325m22.2	chr2-57301953-57302656@tcf3a
0.0521588	tcf3a	chr2-57333341-57334217	1.95539	0.0252688	Superficial_Epithelial	Intron	-1071	tcf3a	chr2-57333341-57334217@tcf3a
0.0535552	tcf3a	chr2-57338563-57338864	3.25156	0.000573862	Superficial_Epithelial	Intron	5173	tcf3a	chr2-57338563-57338864@tcf3a
0.0515098	tcf3a	chr2-57341273-57341693	3.40618	0.000329394	Superficial_Epithelial	Intron	2344	tcf3a	chr2-57341273-57341693@tcf3a
0.0634902	tcf3a	chr2-57345333-57346294	2.05082	0.0201424	Superficial_Epithelial	Exon	-1296	tcf3a	chr2-57345333-57346294@tcf3a
0.155472	tcf3a	chr2-57358992-57360722	6.77898	6.0512e-12	Superficial_Epithelial	Intron	-14955	tcf3a	chr2-57358992-57360722@tcf3a
0.0777932	tcf3a	chr2-57362306-57362515	3.4198	0.000313335	Superficial_Epithelial	Intron	16233	tcf3a	chr2-57362306-57362515@tcf3a
0.0820498	tcf3a	chr2-57377489-57379683	2.57451	0.00501908	Superficial_Epithelial	Promoter	0	tcf3a	chr2-57377489-57379683@tcf3a
0.0526047	tcf3a	chr2-57409015-57409933	2.24545	0.0123697	Superficial_Epithelial	Intergenic	10706	map2k2b	chr2-57409015-57409933@tcf3a
0.055224	KCNJ10	chr2-58304204-58304749	5.33022	4.90467e-08	Superficial_Epithelial	Intron	-11887	NA	chr2-58304204-58304749@KCNJ10
0.0512438	ftr29	chr2-59178556-59178938	5.79147	3.48869e-09	Superficial_Epithelial	Promoter	0	ftr95	chr2-59178556-59178938@ftr29
0.0795985	ftr29	chr2-59204822-59205958	8.40587	2.12355e-17	Superficial_Epithelial	Promoter	0	ftr30	chr2-59204822-59205958@ftr29
0.0688194	ftr29	chr2-59234959-59236184	7.33604	1.10004e-13	Superficial_Epithelial	Intergenic	-3848	ftr31	chr2-59234959-59236184@ftr29
0.0523597	ftr29	chr2-59283583-59285750	6.6128	1.88563e-11	Superficial_Epithelial	Promoter	0	ftr34	chr2-59283583-59285750@ftr29
0.053441	ftr29	chr2-59302249-59302850	6.07162	6.33127e-10	Superficial_Epithelial	Promoter	488	ftr35	chr2-59302249-59302850@ftr29
0.0594293	CU861477.1	chr2-59527980-59528391	6.28846	1.60311e-10	Superficial_Epithelial	Promoter	831	NA	chr2-59527980-59528391@CU861477.1
0.0560516	mhc1zfa	chr3-335393-337053	4.59683	2.14482e-06	Superficial_Epithelial	Promoter	0	mhc1zfa	chr3-335393-337053@mhc1zfa
0.050492	CR792453.2	chr3-532231-533484	6.03081	8.15707e-10	Superficial_Epithelial	Promoter	0	NA	chr3-532231-533484@CR792453.2
0.0633376	FP325358.1	chr3-1271097-1273015	7.73045	5.35842e-15	Superficial_Epithelial	Intron	-8050	tcf20	chr3-1271097-1273015@FP325358.1
0.0628822	tcf20	chr3-1273464-1275346	6.53153	3.25515e-11	Superficial_Epithelial	Intron	7901	tcf20	chr3-1273464-1275346@tcf20
0.12162	CABZ01040998.1	chr3-3477263-3477548	9.88851	2.33459e-23	Superficial_Epithelial	Exon	7663	NA	chr3-3477263-3477548@CABZ01040998.1
0.0718677	plbd1	chr3-3649891-3650925	3.85313	5.83095e-05	Superficial_Epithelial	Exon	8462	plbd1	chr3-3649891-3650925@plbd1
0.0521378	plbd1	chr3-3655678-3656795	2.30172	0.0106754	Superficial_Epithelial	Exon	14249	plbd1	chr3-3655678-3656795@plbd1
0.0638027	art4	chr3-3769926-3770125	4.31412	8.01217e-06	Superficial_Epithelial	Exon	28630	gucy2c	chr3-3769926-3770125@art4
0.055762	si:ch73-338o16.4	chr3-5079901-5081444	3.32323	0.000444904	Superficial_Epithelial	Intergenic	-1963	LOC101886663	chr3-5079901-5081444@si:ch73-338o16.4
0.0758246	si:ch73-338o16.4	chr3-5083043-5083664	6.06704	6.51434e-10	Superficial_Epithelial	Promoter	0	LOC101886663	chr3-5083043-5083664@si:ch73-338o16.4
0.056999	si:ch73-338o16.4	chr3-5114631-5115110	4.50075	3.38576e-06	Superficial_Epithelial	Intron	26844	LOC101886663	chr3-5114631-5115110@si:ch73-338o16.4
0.0699914	si:ch73-338o16.4	chr3-5116094-5116649	5.31374	5.36977e-08	Superficial_Epithelial	Intron	28307	LOC101886663	chr3-5116094-5116649@si:ch73-338o16.4
0.0774	si:ch73-338o16.4	chr3-5118801-5120070	4.1497	1.66456e-05	Superficial_Epithelial	Intron	31014	LOC101886663	chr3-5118801-5120070@si:ch73-338o16.4
0.0501671	myh9b	chr3-5173056-5173633	4.71052	1.23543e-06	Superficial_Epithelial	Intron	54504	myh9b	chr3-5173056-5173633@myh9b
0.0650901	myh9b	chr3-5186423-5189535	5.32092	5.1622e-08	Superficial_Epithelial	Exon	38602	myh9b	chr3-5186423-5189535@myh9b
0.0544338	myh9b	chr3-5193188-5194711	5.00506	2.79225e-07	Superficial_Epithelial	5' UTR	33426	myh9b	chr3-5193188-5194711@myh9b
0.0506006	BX284638.2	chr3-5900609-5901047	2.39451	0.00832129	Superficial_Epithelial	Intron	63510	wu:fb95e10	chr3-5900609-5901047@BX284638.2
0.080328	BX284638.2	chr3-5963455-5964730	3.45063	0.000279637	Superficial_Epithelial	Promoter	0	wu:fb95e10	chr3-5963455-5964730@BX284638.2
0.0590054	jpt1b	chr3-6390786-6391840	2.82011	0.00240039	Superficial_Epithelial	Intron	25440	jpt1b	chr3-6390786-6391840@jpt1b
0.0666373	cygb1	chr3-6617306-6618079	2.59173	0.00477467	Superficial_Epithelial	Intergenic	-8964	si:ch73-59f11.3	chr3-6617306-6618079@cygb1
0.13926	cygb1	chr3-6626116-6627570	4.53086	2.9372e-06	Superficial_Epithelial	Intergenic	-12226	cygb1	chr3-6626116-6627570@cygb1
0.195879	cygb1	chr3-6639144-6640232	6.59292	2.15629e-11	Superficial_Epithelial	Promoter	0	cygb1	chr3-6639144-6640232@cygb1
0.117667	cygb1	chr3-6671784-6673352	3.97868	3.46502e-05	Superficial_Epithelial	Intergenic	31988	cygb1	chr3-6671784-6673352@cygb1
0.0964303	cygb1	chr3-6675098-6676338	2.78575	0.00267022	Superficial_Epithelial	Intergenic	33600	atg4db	chr3-6675098-6676338@cygb1
0.0670312	junbb	chr3-7652900-7657003	7.62448	1.22512e-14	Superficial_Epithelial	Promoter	0	junbb	chr3-7652900-7657003@junbb
0.0647121	BX927317.3	chr3-8093692-8094314	6.11098	4.95095e-10	Superficial_Epithelial	Promoter	0	NA	chr3-8093692-8094314@BX927317.3
0.0543558	CR339059.3	chr3-9806512-9806816	4.67025	1.50413e-06	Superficial_Epithelial	Intergenic	-44974	NA	chr3-9806512-9806816@CR339059.3
0.0539276	mmd	chr3-11529737-11530602	5.59891	1.07854e-08	Superficial_Epithelial	Intergenic	-17914	mmd	chr3-11529737-11530602@mmd
0.0531009	CABZ01087224.1	chr3-11529737-11530602	4.44637	4.36665e-06	Superficial_Epithelial	Intergenic	-17914	mmd	chr3-11529737-11530602@CABZ01087224.1
0.0588709	glis2b	chr3-12252475-12252857	5.9092	1.71887e-09	Superficial_Epithelial	Intergenic	-25116	tfap4	chr3-12252475-12252857@glis2b
0.0643609	vasnb	chr3-12468642-12469432	5.9077	1.73462e-09	Superficial_Epithelial	Intron	-14576	vasnb	chr3-12468642-12469432@vasnb
0.060095	vasnb	chr3-12481232-12482352	4.91915	4.34598e-07	Superficial_Epithelial	Intron	-1656	vasnb	chr3-12481232-12482352@vasnb
0.0581549	cyp2k19	chr3-12831827-12832146	8.24009	8.60378e-17	Superficial_Epithelial	3' UTR	2261	NA	chr3-12831827-12832146@cyp2k19
0.0591464	pdgfab	chr3-12903026-12903961	2.39865	0.00822781	Superficial_Epithelial	Promoter	0	ccdc137	chr3-12903026-12903961@pdgfab
0.0631481	pdgfab	chr3-12907986-12908662	2.57382	0.00502913	Superficial_Epithelial	Intergenic	-4377	ccdc137	chr3-12907986-12908662@pdgfab
0.0586117	pdgfab	chr3-12932691-12933110	1.82317	0.0341391	Superficial_Epithelial	Promoter	0	pdgfab	chr3-12932691-12933110@pdgfab
0.0811996	pdgfab	chr3-12962242-12962965	3.67468	0.000119073	Superficial_Epithelial	Intron	7453	pdgfab	chr3-12962242-12962965@pdgfab
0.063487	pdgfab	chr3-12969721-12970683	1.84104	0.032808	Superficial_Epithelial	Promoter	0	pdgfab	chr3-12969721-12970683@pdgfab
0.127145	pdgfab	chr3-12975961-12976688	5.09366	1.75604e-07	Superficial_Epithelial	Intergenic	-5533	pdgfab	chr3-12975961-12976688@pdgfab
0.135162	pdgfab	chr3-12977591-12978760	5.10002	1.69807e-07	Superficial_Epithelial	Intergenic	-7163	pdgfab	chr3-12977591-12978760@pdgfab
0.100852	pdgfab	chr3-12982280-12982809	4.12464	1.85659e-05	Superficial_Epithelial	Intergenic	-11852	pdgfab	chr3-12982280-12982809@pdgfab
0.0714914	pdgfab	chr3-13006540-13007138	2.51531	0.00594639	Superficial_Epithelial	Exon	-36112	pdgfab	chr3-13006540-13007138@pdgfab
0.0686388	pdgfab	chr3-13009872-13010481	2.44787	0.00718518	Superficial_Epithelial	Intron	-39444	pdgfab	chr3-13009872-13010481@pdgfab
0.0521323	CU138547.1	chr3-13296135-13296787	6.176	3.28736e-10	Superficial_Epithelial	Intergenic	-36083	NA	chr3-13296135-13296787@CU138547.1
0.0543875	hspbp1	chr3-13609600-13611380	5.23831	8.10277e-08	Superficial_Epithelial	Exon	6328	hspbp1	chr3-13609600-13611380@hspbp1
0.0554873	hspbp1	chr3-13613213-13614328	5.34731	4.46353e-08	Superficial_Epithelial	Exon	9941	hspbp1	chr3-13613213-13614328@hspbp1
0.0885936	hspbp1	chr3-13622129-13622444	9.63369	2.88104e-22	Superficial_Epithelial	Intergenic	-2371	pglyrp6	chr3-13622129-13622444@hspbp1
0.0512101	nfil3-6	chr3-14120457-14122357	5.81256	3.0763e-09	Superficial_Epithelial	Intergenic	-16906	nfil3-6	chr3-14120457-14122357@nfil3-6
0.0552453	rab3db	chr3-14536764-14537120	4.51342	3.18956e-06	Superficial_Epithelial	3' UTR	-6833	epor	chr3-14536764-14537120@rab3db
0.116868	tspan35	chr3-14585138-14586128	3.85044	5.89538e-05	Superficial_Epithelial	Exon	3495	znf653	chr3-14585138-14586128@tspan35
0.0626701	tspan35	chr3-14588376-14588721	2.15551	0.0155609	Superficial_Epithelial	Intron	6733	znf653	chr3-14588376-14588721@tspan35
0.10185	tspan35	chr3-14590484-14591719	3.89629	4.88395e-05	Superficial_Epithelial	Intron	8841	znf653	chr3-14590484-14591719@tspan35
0.0692815	tspan35	chr3-14607403-14608402	2.3516	0.00934632	Superficial_Epithelial	Intergenic	-2897	tspan35	chr3-14607403-14608402@tspan35
0.0940309	tspan35	chr3-14610927-14612002	2.95692	0.00155365	Superficial_Epithelial	Promoter	0	tspan35	chr3-14610927-14612002@tspan35
0.0767065	tspan35	chr3-14612913-14613573	3.25958	0.000557888	Superficial_Epithelial	Intron	1614	tspan35	chr3-14612913-14613573@tspan35
0.0780073	tspan35	chr3-14641625-14642877	1.84474	0.0325374	Superficial_Epithelial	Promoter	0	zgc:158403	chr3-14641625-14642877@tspan35
0.0513879	tspan35	chr3-14660315-14661046	3.42275	0.000309952	Superficial_Epithelial	Exon	-13723	zgc:158403	chr3-14660315-14661046@tspan35
0.0592217	tspan35	chr3-14694145-14695875	1.94828	0.0256909	Superficial_Epithelial	Promoter	0	gadd45gip1	chr3-14694145-14695875@tspan35
0.0624829	kctd13	chr3-15216077-15217196	3.94427	4.00223e-05	Superficial_Epithelial	Intron	-5586	hirip3	chr3-15216077-15217196@kctd13
0.0545043	nfatc2ip	chr3-15416264-15417023	4.29887	8.5834e-06	Superficial_Epithelial	Exon	21836	atxn2l	chr3-15416264-15417023@nfatc2ip
0.0607279	nfatc2ip	chr3-15507765-15507930	4.03259	2.7583e-05	Superficial_Epithelial	Intergenic	2488	nupr1b	chr3-15507765-15507930@nfatc2ip
0.0596137	nupr1b	chr3-15504918-15506215	2.90072	0.00186154	Superficial_Epithelial	Promoter	0	nupr1b	chr3-15504918-15506215@nupr1b
0.056837	mvp	chr3-15717563-15718372	3.95759	3.78543e-05	Superficial_Epithelial	Exon	-10796	NA	chr3-15717563-15718372@mvp
0.0534092	mvp	chr3-15718821-15719813	3.42726	0.000304857	Superficial_Epithelial	Exon	-12054	NA	chr3-15718821-15719813@mvp
0.050987	nme3	chr3-15900212-15902277	2.87369	0.00202855	Superficial_Epithelial	3' UTR	-5020	mapk8ip3	chr3-15900212-15902277@nme3
0.0537293	atp6v0ca	chr3-16108172-16110455	3.27244	0.000533109	Superficial_Epithelial	Promoter	0	lasp1	chr3-16108172-16110455@atp6v0ca
0.0513105	lasp1	chr3-16108172-16110455	2.89297	0.00190808	Superficial_Epithelial	Promoter	0	lasp1	chr3-16108172-16110455@lasp1
0.0510565	rpl19	chr3-16160967-16162190	2.88031	0.00198641	Superficial_Epithelial	3' UTR	-18910	arl5c	chr3-16160967-16162190@rpl19
0.0617666	cacnb1	chr3-16170037-16170337	4.14215	1.72031e-05	Superficial_Epithelial	Intron	21476	cacnb1	chr3-16170037-16170337@cacnb1
0.050891	cacnb1	chr3-16226768-16227955	2.94693	0.00160472	Superficial_Epithelial	Promoter	0	cacnb1	chr3-16226768-16227955@cacnb1
0.0657263	rpl19	chr3-16226768-16227955	3.25206	0.000572865	Superficial_Epithelial	Promoter	0	cacnb1	chr3-16226768-16227955@rpl19
0.0518306	stk17al	chr3-16873341-16873664	5.11473	1.57095e-07	Superficial_Epithelial	Promoter	-737	NA	chr3-16873341-16873664@stk17al
0.0722767	si:ch211-210g13.5	chr3-17370163-17370519	7.06649	7.94508e-13	Superficial_Epithelial	Intron	23631	si:ch211-210g13.5	chr3-17370163-17370519@si:ch211-210g13.5
0.0586019	dhx58	chr3-17647672-17648292	4.11271	1.95524e-05	Superficial_Epithelial	Exon	-5492	kat2a	chr3-17647672-17648292@dhx58
0.0644479	dhx58	chr3-17679837-17681516	3.98636	3.35467e-05	Superficial_Epithelial	Exon	-7903	dhx58	chr3-17679837-17681516@dhx58
0.0993244	cnp	chr3-17927118-17928302	2.71757	0.00328818	Superficial_Epithelial	3' UTR	-4830	cnp	chr3-17927118-17928302@cnp
0.101485	cnp	chr3-17929732-17930222	3.11217	0.000928588	Superficial_Epithelial	Intergenic	-2910	cnp	chr3-17929732-17930222@cnp
0.0701165	rps2	chr3-18372750-18374419	1.68609	0.0458894	Superficial_Epithelial	Promoter	0	spag9a	chr3-18372750-18374419@rps2
0.0754718	rps2	chr3-18398441-18399896	1.75678	0.0394779	Superficial_Epithelial	Promoter	0	rps2	chr3-18398441-18399896@rps2
0.0745169	rps2	chr3-18436985-18437885	1.83442	0.0332955	Superficial_Epithelial	Promoter	0	tbc1d16	chr3-18436985-18437885@rps2
0.0705984	rps2	chr3-18443000-18443816	1.71797	0.0429007	Superficial_Epithelial	Intron	-3758	tbc1d16	chr3-18443000-18443816@rps2
0.0568744	il12rb2l	chr3-19218029-19218332	3.77893	7.87506e-05	Superficial_Epithelial	Exon	-1306	NA	chr3-19218029-19218332@il12rb2l
0.0533112	ldlra	chr3-19286693-19287732	3.18854	0.000714965	Superficial_Epithelial	Intergenic	-11577	ldlra	chr3-19286693-19287732@ldlra
0.0639315	ldlra	chr3-19298533-19299989	3.44852	0.000281838	Superficial_Epithelial	Promoter	0	ldlra	chr3-19298533-19299989@ldlra
0.0608653	ldlra	chr3-19304029-19304987	3.83176	6.36161e-05	Superficial_Epithelial	Exon	4720	ldlra	chr3-19304029-19304987@ldlra
0.0709458	CU571315.3	chr3-19484813-19486518	4.96022	3.52072e-07	Superficial_Epithelial	Downstream (1-2kb)	9296	LOC100004427	chr3-19484813-19486518@CU571315.3
0.0534511	CU571315.3	chr3-19499998-19500706	4.70834	1.24869e-06	Superficial_Epithelial	Intergenic	-4184	LOC100004427	chr3-19499998-19500706@CU571315.3
0.060596	zgc:163079	chr3-19552931-19553886	3.76372	8.37017e-05	Superficial_Epithelial	Intergenic	7153	zgc:163079	chr3-19552931-19553886@zgc:163079
0.0557183	zgc:163079	chr3-19559273-19561124	3.34902	0.000405489	Superficial_Epithelial	Promoter	0	zgc:163079	chr3-19559273-19561124@zgc:163079
0.0555844	itgb3a	chr3-19620643-19622462	2.26664	0.0117061	Superficial_Epithelial	Promoter	0	itgb3a	chr3-19620643-19622462@itgb3a
0.0634318	atxn7l3	chr3-19950843-19951442	6.02901	8.24849e-10	Superficial_Epithelial	Intron	36511	vat1	chr3-19950843-19951442@atxn7l3
0.0626222	ngfra	chr3-20164843-20165737	5.05459	2.15654e-07	Superficial_Epithelial	Intron	7887	ngfra	chr3-20164843-20165737@ngfra
0.0527698	ndufa4l	chr3-20858406-20859444	2.90909	0.00181242	Superficial_Epithelial	Intergenic	-53866	NA	chr3-20858406-20859444@ndufa4l
0.0501414	slc35b1	chr3-20955882-20957937	2.49149	0.00636044	Superficial_Epithelial	Promoter	0	ndufa4l	chr3-20955882-20957937@slc35b1
0.0595184	rundc3aa	chr3-21033770-21034145	6.37742	9.00458e-11	Superficial_Epithelial	Intron	3695	rundc3aa	chr3-21033770-21034145@rundc3aa
0.05364	zgc:123295	chr3-21160105-21160565	5.01157	2.69935e-07	Superficial_Epithelial	Exon	6032	taok2a	chr3-21160105-21160565@zgc:123295
0.0688028	syngr1a	chr3-21245264-21245446	5.463	2.34081e-08	Superficial_Epithelial	Intergenic	-2804	tcap	chr3-21245264-21245446@syngr1a
0.0691506	fam171a2a	chr3-21276249-21276466	4.03002	2.78862e-05	Superficial_Epithelial	Intron	3907	syngr1a	chr3-21276249-21276466@fam171a2a
0.0979787	fam171a2a	chr3-21279799-21280645	2.81224	0.00245987	Superficial_Epithelial	Promoter	0	syngr1a	chr3-21279799-21280645@fam171a2a
0.103153	fam171a2a	chr3-21285231-21286360	2.47523	0.00665753	Superficial_Epithelial	Intron	1842	fam171a2a	chr3-21285231-21286360@fam171a2a
0.0981703	fam171a2a	chr3-21294313-21295761	2.7811	0.00270876	Superficial_Epithelial	Intron	-6111	fam171a2a	chr3-21294313-21295761@fam171a2a
0.117902	fam171a2a	chr3-21309080-21309907	3.91587	4.50389e-05	Superficial_Epithelial	Intron	-20878	fam171a2a	chr3-21309080-21309907@fam171a2a
0.0505303	fam171a2a	chr3-21323879-21324407	2.64483	0.00408659	Superficial_Epithelial	Intron	24071	fam171a2a	chr3-21323879-21324407@fam171a2a
0.0732321	fam171a2a	chr3-21332495-21332669	4.23858	1.1247e-05	Superficial_Epithelial	Intron	15809	fam171a2a	chr3-21332495-21332669@fam171a2a
0.179331	fam171a2a	chr3-21340297-21341879	4.63703	1.76725e-06	Superficial_Epithelial	Intron	6599	fam171a2a	chr3-21340297-21341879@fam171a2a
0.13808	fam171a2a	chr3-21347851-21348739	3.96604	3.65376e-05	Superficial_Epithelial	Promoter	0	fam171a2a	chr3-21347851-21348739@fam171a2a
0.0890014	fam171a2a	chr3-21351107-21351702	2.29945	0.0107397	Superficial_Epithelial	Exon	-2629	fam171a2a	chr3-21351107-21351702@fam171a2a
0.0616487	crhr1	chr3-21642637-21643546	6.90241	2.55633e-12	Superficial_Epithelial	Intergenic	-25597	NA	chr3-21642637-21643546@crhr1
0.0604419	crhr1	chr3-21656898-21657515	7.05841	8.42119e-13	Superficial_Epithelial	Intergenic	-12030	crhr1	chr3-21656898-21657515@crhr1
0.057399	crhr1	chr3-21661462-21662391	5.76295	4.13292e-09	Superficial_Epithelial	Intergenic	-7154	crhr1	chr3-21661462-21662391@crhr1
0.082396	crhr1	chr3-21693365-21694745	9.93983	1.39654e-23	Superficial_Epithelial	Intron	23820	crhr1	chr3-21693365-21694745@crhr1
0.0653367	crhr1	chr3-21727130-21727523	7.8573	1.96245e-15	Superficial_Epithelial	Intron	57585	crhr1	chr3-21727130-21727523@crhr1
0.0681058	kansl1b	chr3-22058710-22061515	4.62411	1.88108e-06	Superficial_Epithelial	Promoter	0	kansl1b	chr3-22058710-22061515@kansl1b
0.0532901	ifnphi2	chr3-22453872-22454307	5.27458	6.65303e-08	Superficial_Epithelial	Intron	10559	wnk4b	chr3-22453872-22454307@ifnphi2
0.0809807	tanc2a	chr3-22571521-22571877	3.36179	0.000387198	Superficial_Epithelial	Intergenic	2534	NA	chr3-22571521-22571877@tanc2a
0.0902153	tanc2a	chr3-22617443-22618873	2.30366	0.0106209	Superficial_Epithelial	Intron	-17797	tanc2a	chr3-22617443-22618873@tanc2a
0.054361	tanc2a	chr3-22628680-22629367	2.40981	0.00798043	Superficial_Epithelial	Intron	-7303	tanc2a	chr3-22628680-22629367@tanc2a
0.0536783	cyb561	chr3-22913818-22914387	3.52214	0.000214036	Superficial_Epithelial	Intron	8477	hdac5	chr3-22913818-22914387@cyb561
0.120911	col1a1a	chr3-23120629-23121459	2.67389	0.0037489	Superficial_Epithelial	Intron	23885	NA	chr3-23120629-23121459@col1a1a
0.0682415	col1a1a	chr3-23122173-23122570	1.92215	0.0272936	Superficial_Epithelial	Intron	25429	NA	chr3-23122173-23122570@col1a1a
0.192867	col1a1a	chr3-23126838-23128742	5.39826	3.36445e-08	Superficial_Epithelial	Intron	30094	NA	chr3-23126838-23128742@col1a1a
0.0620214	col1a1a	chr3-23132721-23133434	2.4494	0.00715476	Superficial_Epithelial	Intron	35977	NA	chr3-23132721-23133434@col1a1a
0.0606398	col1a1a	chr3-23142732-23143239	2.70268	0.00343916	Superficial_Epithelial	Intron	45988	NA	chr3-23142732-23143239@col1a1a
0.0796594	col1a1a	chr3-23144671-23146472	4.23918	1.12169e-05	Superficial_Epithelial	Intron	47927	NA	chr3-23144671-23146472@col1a1a
0.064303	col1a1a	chr3-23155788-23156608	1.91744	0.0275909	Superficial_Epithelial	Intron	59044	NA	chr3-23155788-23156608@col1a1a
0.128773	col1a1a	chr3-23161366-23162466	2.85881	0.00212617	Superficial_Epithelial	Intron	-58581	col1a1a	chr3-23161366-23162466@col1a1a
0.0699426	AL929222.2	chr3-23161366-23162466	4.86328	5.77282e-07	Superficial_Epithelial	Intron	-58581	col1a1a	chr3-23161366-23162466@AL929222.2
0.129583	col1a1a	chr3-23171860-23172759	3.45466	0.000275489	Superficial_Epithelial	Intron	-48288	col1a1a	chr3-23171860-23172759@col1a1a
0.053247	ppp1r9ba	chr3-23171860-23172759	3.58345	0.000169543	Superficial_Epithelial	Intron	-48288	col1a1a	chr3-23171860-23172759@ppp1r9ba
0.176577	col1a1a	chr3-23182381-23183450	4.19472	1.36603e-05	Superficial_Epithelial	Intergenic	-37597	col1a1a	chr3-23182381-23183450@col1a1a
0.0679908	col1a1a	chr3-23194524-23195209	2.20977	0.0135605	Superficial_Epithelial	Intergenic	-25838	col1a1a	chr3-23194524-23195209@col1a1a
0.0747079	col1a1a	chr3-23197292-23197904	2.0705	0.0192026	Superficial_Epithelial	Intergenic	-23143	col1a1a	chr3-23197292-23197904@col1a1a
0.0554604	ppp1r9ba	chr3-23197292-23197904	4.78725	8.45425e-07	Superficial_Epithelial	Intergenic	-23143	col1a1a	chr3-23197292-23197904@ppp1r9ba
0.0641416	col1a1a	chr3-23199220-23200341	2.0114	0.0221414	Superficial_Epithelial	Intergenic	-20706	col1a1a	chr3-23199220-23200341@col1a1a
0.124258	col1a1a	chr3-23219547-23220002	5.09537	1.74035e-07	Superficial_Epithelial	Downstream (<1kb)	-1045	col1a1a	chr3-23219547-23220002@col1a1a
0.135935	col1a1a	chr3-23220727-23222820	3.34042	0.000418263	Superficial_Epithelial	Promoter	0	col1a1a	chr3-23220727-23222820@col1a1a
0.0728322	col1a1a	chr3-23223853-23224330	2.20248	0.0138156	Superficial_Epithelial	Exon	2806	col1a1a	chr3-23223853-23224330@col1a1a
0.0953426	col1a1a	chr3-23248631-23249530	2.1181	0.0170832	Superficial_Epithelial	Promoter	0	ppp1r9ba	chr3-23248631-23249530@col1a1a
0.0507597	ppp1r9ba	chr3-23220727-23222820	3.56673	0.000180729	Superficial_Epithelial	Promoter	0	col1a1a	chr3-23220727-23222820@ppp1r9ba
0.0781378	rapgefl1	chr3-23314771-23316011	2.20462	0.0137403	Superficial_Epithelial	Exon	66067	ppp1r9ba	chr3-23314771-23316011@rapgefl1
0.0680613	rapgefl1	chr3-23340244-23341130	2.194	0.0141176	Superficial_Epithelial	Exon	41478	NA	chr3-23340244-23341130@rapgefl1
0.0527869	rapgefl1	chr3-23359111-23359863	2.86444	0.0020887	Superficial_Epithelial	Exon	22745	NA	chr3-23359111-23359863@rapgefl1
0.101762	rapgefl1	chr3-23370282-23371550	3.49245	0.000239303	Superficial_Epithelial	Exon	11058	NA	chr3-23370282-23371550@rapgefl1
0.0510605	rapgefl1	chr3-23382017-23382615	2.86943	0.00205604	Superficial_Epithelial	Promoter	0	NA	chr3-23382017-23382615@rapgefl1
0.0692885	rapgefl1	chr3-23388329-23389170	1.97605	0.0240747	Superficial_Epithelial	Intron	-5721	NA	chr3-23388329-23389170@rapgefl1
0.104918	rapgefl1	chr3-23396462-23397484	2.92994	0.00169511	Superficial_Epithelial	Intron	9480	rapgefl1	chr3-23396462-23397484@rapgefl1
0.0870566	rapgefl1	chr3-23402570-23403295	2.90725	0.00182312	Superficial_Epithelial	Intron	3669	rapgefl1	chr3-23402570-23403295@rapgefl1
0.0529023	rapgefl1	chr3-23406430-23407832	2.21965	0.0132214	Superficial_Epithelial	Promoter	0	rapgefl1	chr3-23406430-23407832@rapgefl1
0.0589952	rapgefl1	chr3-23461153-23462574	1.67606	0.046863	Superficial_Epithelial	Promoter	0	casc3	chr3-23461153-23462574@rapgefl1
0.0527848	rapgefl1	chr3-23474008-23474505	1.73585	0.0412949	Superficial_Epithelial	Promoter	0	si:dkey-225f5.5	chr3-23474008-23474505@rapgefl1
0.0628543	rapgefl1	chr3-23477974-23479853	1.90857	0.028159	Superficial_Epithelial	Intergenic	-3558	si:dkey-225f5.5	chr3-23477974-23479853@rapgefl1
0.0594338	rapgefl1	chr3-23485809-23486545	2.46727	0.00680743	Superficial_Epithelial	Intergenic	-2107	nr1d1	chr3-23485809-23486545@rapgefl1
0.0722833	rapgefl1	chr3-23488313-23491298	2.36106	0.00911128	Superficial_Epithelial	Promoter	0	nr1d1	chr3-23488313-23491298@rapgefl1
0.0537543	msl1a	chr3-23555178-23555790	7.03326	1.00883e-12	Superficial_Epithelial	3' UTR	18832	igf2bp1	chr3-23555178-23555790@msl1a
0.0534533	nr1d1	chr3-23485809-23486545	6.04507	7.46705e-10	Superficial_Epithelial	Intergenic	-2107	nr1d1	chr3-23485809-23486545@nr1d1
0.0522655	nfe2l1a	chr3-24069613-24071433	6.33105	1.21746e-10	Superficial_Epithelial	3' UTR	6865	cbx1a	chr3-24069613-24071433@nfe2l1a
0.0654731	pvalb6	chr3-24297648-24298097	6.98662	1.40793e-12	Superficial_Epithelial	Promoter	0	NA	chr3-24297648-24298097@pvalb6
0.0542487	pvalb6	chr3-24353719-24354289	5.59983	1.07282e-08	Superficial_Epithelial	Intron	-6807	pvalb6	chr3-24353719-24354289@pvalb6
0.0566109	csf2rb	chr3-24334794-24335246	5.98593	1.07575e-09	Superficial_Epithelial	5' UTR	2568	csf2rb	chr3-24334794-24335246@csf2rb
0.0521943	sp100.3	chr3-24587441-24587767	4.47353	3.84689e-06	Superficial_Epithelial	Intron	-8155	si:dkey-68o6.5	chr3-24587441-24587767@sp100.3
0.0531349	zgc:171506	chr3-24603113-24604527	3.88554	5.10517e-05	Superficial_Epithelial	Promoter	0	si:dkey-68o6.6	chr3-24603113-24604527@zgc:171506
0.0526412	zmp:0000000912	chr3-24603113-24604527	4.12768	1.83218e-05	Superficial_Epithelial	Promoter	0	si:dkey-68o6.6	chr3-24603113-24604527@zmp:0000000912
0.0656444	zgc:171506	chr3-24611757-24614026	6.21533	2.56082e-10	Superficial_Epithelial	Promoter	0	zgc:171506	chr3-24611757-24614026@zgc:171506
0.0596729	zmp:0000000912	chr3-24650088-24651069	4.20268	1.31884e-05	Superficial_Epithelial	Intergenic	-4574	NA	chr3-24650088-24651069@zmp:0000000912
0.055605	BX569789.1	chr3-24691727-24692519	4.92726	4.16961e-07	Superficial_Epithelial	3' UTR	9872	slc25a17	chr3-24691727-24692519@BX569789.1
0.0570669	mrtfaa	chr3-24735706-24735899	5.57757	1.21952e-08	Superficial_Epithelial	Intron	9982	NA	chr3-24735706-24735899@mrtfaa
0.0541414	CABZ01050944.1	chr3-24904407-24904782	3.343	0.000414393	Superficial_Epithelial	5' UTR	4463	LOC100535636	chr3-24904407-24904782@CABZ01050944.1
0.0580845	kpna2	chr3-25321825-25322641	3.90785	4.65597e-05	Superficial_Epithelial	Exon	-46422	ddx5	chr3-25321825-25322641@kpna2
0.0530404	kpna2	chr3-25329531-25330094	3.23871	0.000600367	Superficial_Epithelial	Intron	39463	smurf2	chr3-25329531-25330094@kpna2
0.065646	usp43b	chr3-25586597-25587278	3.36179	0.000387199	Superficial_Epithelial	Intron	13819	NA	chr3-25586597-25587278@usp43b
0.061347	usp43b	chr3-25601211-25601613	5.06078	2.08769e-07	Superficial_Epithelial	Exon	28433	NA	chr3-25601211-25601613@usp43b
0.0709249	usp43b	chr3-25606204-25606988	3.4582	0.000271903	Superficial_Epithelial	Intron	33426	NA	chr3-25606204-25606988@usp43b
0.075167	usp43b	chr3-25610915-25611615	3.95855	3.77038e-05	Superficial_Epithelial	Intron	34534	usp43b	chr3-25610915-25611615@usp43b
0.057873	usp43b	chr3-25625896-25626582	3.39676	0.00034094	Superficial_Epithelial	Intron	19567	usp43b	chr3-25625896-25626582@usp43b
0.158784	hmox1a	chr3-26008949-26010034	6.47053	4.88303e-11	Superficial_Epithelial	Exon	7558	hmox1a	chr3-26008949-26010034@hmox1a
0.186076	hmox1a	chr3-26010246-26011244	6.1928	2.95528e-10	Superficial_Epithelial	3' UTR	6348	hmox1a	chr3-26010246-26011244@hmox1a
0.0828301	hmox1a	chr3-26016132-26016356	3.11772	0.000911275	Superficial_Epithelial	Intron	1236	hmox1a	chr3-26016132-26016356@hmox1a
0.101301	hmox1a	chr3-26016923-26017829	2.8926	0.00191036	Superficial_Epithelial	Promoter	0	hmox1a	chr3-26016923-26017829@hmox1a
0.0624013	hmox1a	chr3-26063164-26064848	1.72123	0.0426044	Superficial_Epithelial	Promoter	0	si:dkeyp-69e1.8	chr3-26063164-26064848@hmox1a
0.0512334	foxred2	chr3-26092814-26093388	3.50465	0.000228605	Superficial_Epithelial	Intron	11471	atp2a1	chr3-26092814-26093388@foxred2
0.0724005	atp2a1	chr3-26111439-26112906	9.31257	6.239e-21	Superficial_Epithelial	3' UTR	-2117	zgc:162612	chr3-26111439-26112906@atp2a1
0.0985104	atp2a1	chr3-26126697-26128262	11.7032	6.13841e-32	Superficial_Epithelial	3' UTR	2961	hsp70.3	chr3-26126697-26128262@atp2a1
0.0701021	hsp70.2	chr3-26110537-26110897	7.96252	8.42858e-16	Superficial_Epithelial	Intron	-1215	zgc:162612	chr3-26110537-26110897@hsp70.2
0.0537591	hsp70.3	chr3-26110537-26110897	6.76277	6.76881e-12	Superficial_Epithelial	Intron	-1215	zgc:162612	chr3-26110537-26110897@hsp70.3
0.204406	hsp70.1	chr3-26111439-26112906	21.6751	1.76238e-104	Superficial_Epithelial	3' UTR	-2117	zgc:162612	chr3-26111439-26112906@hsp70.1
0.255184	hsp70.2	chr3-26111439-26112906	26.6637	6.20798e-157	Superficial_Epithelial	3' UTR	-2117	zgc:162612	chr3-26111439-26112906@hsp70.2
0.211433	hsp70.3	chr3-26111439-26112906	20.0395	1.24646e-89	Superficial_Epithelial	3' UTR	-2117	zgc:162612	chr3-26111439-26112906@hsp70.3
0.172378	hsp70.1	chr3-26126697-26128262	19.7875	1.90787e-87	Superficial_Epithelial	3' UTR	2961	hsp70.3	chr3-26126697-26128262@hsp70.1
0.071445	hsp70.2	chr3-26122187-26123995	6.95583	1.75245e-12	Superficial_Epithelial	Promoter	0	hsp70.3	chr3-26122187-26123995@hsp70.2
0.219897	hsp70.2	chr3-26126697-26128262	21.5187	5.19804e-103	Superficial_Epithelial	3' UTR	2961	hsp70.3	chr3-26126697-26128262@hsp70.2
0.088272	hsp70.3	chr3-26122187-26123995	8.21626	1.04973e-16	Superficial_Epithelial	Promoter	0	hsp70.3	chr3-26122187-26123995@hsp70.3
0.27917	hsp70.3	chr3-26126697-26128262	25.1959	2.22044e-140	Superficial_Epithelial	3' UTR	2961	hsp70.3	chr3-26126697-26128262@hsp70.3
0.0527622	gdpd3a	chr3-26190446-26192297	2.22621	0.0130001	Superficial_Epithelial	Promoter	0	ypel3	chr3-26190446-26192297@gdpd3a
0.0699687	C3H17orf75	chr3-26421352-26422122	8.61742	3.42404e-18	Superficial_Epithelial	Intron	71697	rps15a	chr3-26421352-26422122@C3H17orf75
0.100393	xylt1	chr3-26442093-26443561	4.80228	7.84334e-07	Superficial_Epithelial	Intron	81373	xylt1	chr3-26442093-26443561@xylt1
0.0601847	xylt1	chr3-26486509-26487110	3.49929	0.000233252	Superficial_Epithelial	Intron	37824	xylt1	chr3-26486509-26487110@xylt1
0.0616689	xylt1	chr3-26498917-26499875	3.16872	0.00076556	Superficial_Epithelial	Intron	25059	xylt1	chr3-26498917-26499875@xylt1
0.0603385	xylt1	chr3-26514361-26515423	3.16629	0.000771996	Superficial_Epithelial	Intron	9511	xylt1	chr3-26514361-26515423@xylt1
0.0557604	clec16a	chr3-26899794-26900300	4.47604	3.80194e-06	Superficial_Epithelial	Exon	4474	clec16a	chr3-26899794-26900300@clec16a
0.058855	si:ch211-157c3.4	chr3-27636025-27636951	2.71202	0.00334369	Superficial_Epithelial	Exon	-5127	ptx4	chr3-27636025-27636951@si:ch211-157c3.4
0.0695787	si:ch211-157c3.4	chr3-27637579-27639761	3.52832	0.000209107	Superficial_Epithelial	3' UTR	-2317	ptx4	chr3-27637579-27639761@si:ch211-157c3.4
0.05228	si:ch211-157c3.4	chr3-27639998-27640788	2.63957	0.00415056	Superficial_Epithelial	3' UTR	-1290	ptx4	chr3-27639998-27640788@si:ch211-157c3.4
0.0685075	si:ch211-157c3.4	chr3-27678239-27679849	3.67814	0.000117471	Superficial_Epithelial	Promoter	706	clcn7	chr3-27678239-27679849@si:ch211-157c3.4
0.0552129	si:ch211-157c3.4	chr3-27682107-27682639	4.26779	9.87076e-06	Superficial_Epithelial	Exon	4574	clcn7	chr3-27682107-27682639@si:ch211-157c3.4
0.0686515	si:ch211-157c3.4	chr3-27698142-27700099	3.53023	0.000207596	Superficial_Epithelial	Intron	13081	NA	chr3-27698142-27700099@si:ch211-157c3.4
0.0655459	arhgdig	chr3-27691676-27692790	4.13792	1.75235e-05	Superficial_Epithelial	Exon	14143	clcn7	chr3-27691676-27692790@arhgdig
0.0627889	arhgdig	chr3-27718552-27719831	3.54926	0.00019316	Superficial_Epithelial	Intron	-2524	arhgdig	chr3-27718552-27719831@arhgdig
0.097821	2024-09-12	chr3-28487475-28488831	4.64002	1.74191e-06	Superficial_Epithelial	Intron	-13588	2024-09-12	chr3-28487475-28488831@sept12
0.0935538	2024-09-12	chr3-28524232-28526055	3.64128	0.000135641	Superficial_Epithelial	Intron	-21739	NA	chr3-28524232-28526055@sept12
0.0610665	2024-09-12	chr3-28535346-28536899	2.00231	0.0226256	Superficial_Epithelial	Intron	-32853	NA	chr3-28535346-28536899@sept12
0.0747904	2024-09-12	chr3-28556807-28557852	2.6451	0.00408328	Superficial_Epithelial	Intron	-18321	2024-09-12	chr3-28556807-28557852@sept12
0.0576378	2024-09-12	chr3-28587022-28587740	2.27971	0.0113125	Superficial_Epithelial	Intron	5625	2024-09-12	chr3-28587022-28587740@sept12
0.0685286	2024-09-12	chr3-28601932-28603414	2.53049	0.00569518	Superficial_Epithelial	Intron	7219	2024-09-12	chr3-28601932-28603414@sept12
0.0567324	gsg1l	chr3-28656000-28656220	3.35298	0.000399733	Superficial_Epithelial	Intron	6029	NA	chr3-28656000-28656220@gsg1l
0.0636869	gsg1l	chr3-28741135-28742395	3.12002	0.000904199	Superficial_Epithelial	Exon	8100	gsg1l	chr3-28741135-28742395@gsg1l
0.0582465	si:ch211-76l23.4	chr3-28749679-28750914	2.58692	0.00484191	Superficial_Epithelial	Promoter	0	gsg1l	chr3-28749679-28750914@si:ch211-76l23.4
0.0640878	si:ch211-76l23.4	chr3-28822138-28822701	5.18882	1.05814e-07	Superficial_Epithelial	3' UTR	5541	si:ch211-76l23.4	chr3-28822138-28822701@si:ch211-76l23.4
0.0602939	si:ch211-76l23.4	chr3-28827610-28828472	4.41711	5.00152e-06	Superficial_Epithelial	Promoter	0	si:ch211-76l23.4	chr3-28827610-28828472@si:ch211-76l23.4
0.0689022	si:ch211-76l23.4	chr3-28839809-28840875	3.08141	0.00103011	Superficial_Epithelial	Intron	-1247	flr	chr3-28839809-28840875@si:ch211-76l23.4
0.0799972	si:ch211-76l23.4	chr3-28842175-28843413	3.75574	8.6416e-05	Superficial_Epithelial	Promoter	53	flr	chr3-28842175-28843413@si:ch211-76l23.4
0.0507892	cacna1ia	chr3-29032027-29032669	1.95392	0.0253551	Superficial_Epithelial	Intergenic	-49598	cacna1ia	chr3-29032027-29032669@cacna1ia
0.0559044	cacna1ia	chr3-29032972-29033886	1.86061	0.0313997	Superficial_Epithelial	Intergenic	-48381	cacna1ia	chr3-29032972-29033886@cacna1ia
0.0637343	cacna1ia	chr3-29042175-29042638	3.28276	0.000513985	Superficial_Epithelial	Intergenic	-39629	cacna1ia	chr3-29042175-29042638@cacna1ia
0.074315	cacna1ia	chr3-29054361-29055167	2.73676	0.00310239	Superficial_Epithelial	Intergenic	-27100	cacna1ia	chr3-29054361-29055167@cacna1ia
0.0727938	cacna1ia	chr3-29127971-29128827	3.72904	9.61057e-05	Superficial_Epithelial	Intron	-38193	NA	chr3-29127971-29128827@cacna1ia
0.0543291	cacna1ia	chr3-29164681-29165276	3.46741	0.000262747	Superficial_Epithelial	Intron	-1744	NA	chr3-29164681-29165276@cacna1ia
0.0579122	BX649558.1	chr3-29470386-29470627	4.4083	5.20933e-06	Superficial_Epithelial	Intron	1103	fam83fa	chr3-29470386-29470627@BX649558.1
0.0796967	fam83fa	chr3-29463729-29464387	2.83981	0.00225705	Superficial_Epithelial	Intron	-4896	fam83fa	chr3-29463729-29464387@fam83fa
0.121829	fam83fa	chr3-29468716-29469824	4.38149	5.89355e-06	Superficial_Epithelial	Promoter	0	fam83fa	chr3-29468716-29469824@fam83fa
0.0706597	fam83fa	chr3-29470386-29470627	4.32085	7.77135e-06	Superficial_Epithelial	Intron	1103	fam83fa	chr3-29470386-29470627@fam83fa
0.0936095	fam83fa	chr3-29472210-29473162	3.16725	0.000769447	Superficial_Epithelial	Intron	-2923	fam83fa	chr3-29472210-29473162@fam83fa
0.0676636	fam83fa	chr3-29478620-29479619	1.85031	0.0321348	Superficial_Epithelial	Intron	2535	fam83fa	chr3-29478620-29479619@fam83fa
0.0671928	fam83fa	chr3-29483321-29484300	1.8357	0.0332007	Superficial_Epithelial	3' UTR	7236	fam83fa	chr3-29483321-29484300@fam83fa
0.0887163	fam83fa	chr3-29488703-29490294	2.91715	0.00176622	Superficial_Epithelial	3' UTR	12618	fam83fa	chr3-29488703-29490294@fam83fa
0.0826841	fam83fa	chr3-29510779-29511815	2.02409	0.0214804	Superficial_Epithelial	Promoter	0	rac2	chr3-29510779-29511815@fam83fa
0.073027	fam83fa	chr3-29522123-29523086	1.64566	0.0499169	Superficial_Epithelial	Intron	11280	rac2	chr3-29522123-29523086@fam83fa
0.0577289	rac2	chr3-29512056-29513100	2.33431	0.00978983	Superficial_Epithelial	Intron	1213	rac2	chr3-29512056-29513100@rac2
0.0723193	rac2	chr3-29522123-29523086	3.24369	0.000589965	Superficial_Epithelial	Intron	11280	rac2	chr3-29522123-29523086@rac2
0.0637424	sult3st1	chr3-29703189-29703659	8.82693	5.37952e-19	Superficial_Epithelial	Intergenic	-11116	cacng2a	chr3-29703189-29703659@sult3st1
0.0526144	rpl3	chr3-29909905-29911109	1.87073	0.0306913	Superficial_Epithelial	Promoter	0	si:dkey-151m15.5	chr3-29909905-29911109@rpl3
0.0765079	cldni	chr3-30914082-30914328	2.45724	0.00700045	Superficial_Epithelial	Intergenic	-4595	ppp1caa	chr3-30914082-30914328@cldni
0.292547	cldni	chr3-30920448-30921590	6.63387	1.63499e-11	Superficial_Epithelial	Promoter	0	cldni	chr3-30920448-30921590@cldni
0.205688	cldni	chr3-30921985-30922949	4.00102	3.15348e-05	Superficial_Epithelial	Promoter	0	cldni	chr3-30921985-30922949@cldni
0.144548	cldni	chr3-30926501-30927140	4.0325	2.75928e-05	Superficial_Epithelial	3' UTR	3554	cldni	chr3-30926501-30927140@cldni
0.0752914	cldni	chr3-30927671-30928118	2.82627	0.00235464	Superficial_Epithelial	Intron	4724	cldni	chr3-30927671-30928118@cldni
0.0637177	cldni	chr3-30930256-30931075	1.7592	0.0392714	Superficial_Epithelial	Intron	7309	cldni	chr3-30930256-30931075@cldni
0.11265	cldni	chr3-30961811-30964292	3.12649	0.000884542	Superficial_Epithelial	Promoter	0	paqr4a	chr3-30961811-30964292@cldni
0.0976066	cldni	chr3-31015868-31016876	1.81686	0.0346196	Superficial_Epithelial	Intron	2839	LOC100001051	chr3-31015868-31016876@cldni
0.0610478	arl6ip1	chr3-31015868-31016876	1.73222	0.0416169	Superficial_Epithelial	Intron	2839	LOC100001051	chr3-31015868-31016876@arl6ip1
0.0636123	arl6ip1	chr3-31112994-31113322	2.68878	0.00358571	Superficial_Epithelial	Intron	2279	arl6ip1	chr3-31112994-31113322@arl6ip1
0.0638065	arl6ip1	chr3-31113779-31116226	2.12362	0.0168508	Superficial_Epithelial	Promoter	0	arl6ip1	chr3-31113779-31116226@arl6ip1
0.0592204	arl6ip1	chr3-31157198-31158900	2.39965	0.00820537	Superficial_Epithelial	Promoter	0	smg1	chr3-31157198-31158900@arl6ip1
0.0658691	arl6ip1	chr3-31160698-31161650	1.93695	0.0263757	Superficial_Epithelial	Intergenic	-2261	smg1	chr3-31160698-31161650@arl6ip1
0.050435	apnl	chr3-31182773-31183042	3.92557	4.32616e-05	Superficial_Epithelial	Intron	4801	clec19a	chr3-31182773-31183042@apnl
0.0620563	syt17	chr3-31245275-31245722	5.85932	2.32388e-09	Superficial_Epithelial	Intergenic	8657	apnl	chr3-31245275-31245722@syt17
0.0516883	apnl	chr3-31231748-31232702	3.19705	0.000694216	Superficial_Epithelial	Intergenic	-4907	syt17	chr3-31231748-31232702@apnl
0.0594428	apnl	chr3-31235039-31235891	2.35486	0.00926491	Superficial_Epithelial	Intergenic	-8198	syt17	chr3-31235039-31235891@apnl
0.0624988	apnl	chr3-31253987-31255749	2.6877	0.00359728	Superficial_Epithelial	Promoter	0	apnl	chr3-31253987-31255749@apnl
0.079357	apnl	chr3-31258995-31260433	3.37514	0.000368886	Superficial_Epithelial	Promoter	-536	LOC100534815	chr3-31258995-31260433@apnl
0.0660389	apnl	chr3-31294250-31295858	2.94739	0.00160234	Superficial_Epithelial	Intergenic	-35791	LOC100534815	chr3-31294250-31295858@apnl
0.0731941	LO017965.1	chr3-31258995-31260433	3.85476	5.79227e-05	Superficial_Epithelial	Promoter	-536	LOC100534815	chr3-31258995-31260433@LO017965.1
0.0628595	limd2	chr3-31783016-31784203	3.96578	3.65785e-05	Superficial_Epithelial	Promoter	0	kcnh6a	chr3-31783016-31784203@limd2
0.0652336	BX324157.2	chr3-31808967-31809570	8.60717	3.74444e-18	Superficial_Epithelial	Intergenic	-4486	gfap	chr3-31808967-31809570@BX324157.2
0.0677888	limd2	chr3-31871268-31871664	4.31313	8.04785e-06	Superficial_Epithelial	Intron	3474	limd2	chr3-31871268-31871664@limd2
0.0642091	limd2	chr3-31873900-31875580	5.22567	8.67644e-08	Superficial_Epithelial	Promoter	0	limd2	chr3-31873900-31875580@limd2
0.0561614	fthl28	chr3-32034982-32035920	4.28511	9.13228e-06	Superficial_Epithelial	Intron	35548	LOC100534669	chr3-32034982-32035920@fthl28
0.130878	fthl27	chr3-32097957-32102477	8.79641	7.06295e-19	Superficial_Epithelial	Promoter	0	fthl27	chr3-32097957-32102477@fthl27
0.0597412	prmt1	chr3-32385995-32387478	3.90169	4.77624e-05	Superficial_Epithelial	Exon	-2082	ap2a1	chr3-32385995-32387478@prmt1
0.0551859	ap2a1	chr3-32385995-32387478	3.07502	0.00105243	Superficial_Epithelial	Exon	-2082	ap2a1	chr3-32385995-32387478@ap2a1
0.0986479	rcn3	chr3-32460444-32460986	3.90259	4.75838e-05	Superficial_Epithelial	Promoter	0	si:ch211-195b15.7	chr3-32460444-32460986@rcn3
0.0580942	rcn3	chr3-32466054-32467225	2.42929	0.00756418	Superficial_Epithelial	Exon	4930	si:ch211-195b15.7	chr3-32466054-32467225@rcn3
0.0722257	rcn3	chr3-32474210-32475115	2.07313	0.0190803	Superficial_Epithelial	Promoter	0	NA	chr3-32474210-32475115@rcn3
0.0595066	rcn3	chr3-32539898-32541866	1.88213	0.0299089	Superficial_Epithelial	Promoter	0	rcn3	chr3-32539898-32541866@rcn3
0.0536957	si:ch73-248e21.1	chr3-32584699-32585447	5.35062	4.38257e-08	Superficial_Epithelial	Downstream (1-2kb)	4717	tspan4b	chr3-32584699-32585447@si:ch73-248e21.1
0.0726371	si:ch73-248e21.1	chr3-32586793-32587596	5.49103	1.99801e-08	Superficial_Epithelial	3' UTR	2568	tspan4b	chr3-32586793-32587596@si:ch73-248e21.1
0.0849969	si:ch73-248e21.1	chr3-32588997-32589571	6.41828	6.89122e-11	Superficial_Epithelial	Promoter	593	tspan4b	chr3-32588997-32589571@si:ch73-248e21.1
0.0523241	hsd3b7	chr3-32749235-32750371	2.39464	0.00831825	Superficial_Epithelial	Promoter	0	hsd3b7	chr3-32749235-32750371@hsd3b7
0.0765044	hsd3b7	chr3-32780786-32782534	3.9994	3.17516e-05	Superficial_Epithelial	Intergenic	-7071	tbc1d10b	chr3-32780786-32782534@hsd3b7
0.0521162	si:dkey-16l2.20	chr3-32849074-32849871	5.62172	9.4533e-09	Superficial_Epithelial	Exon	6249	prr14	chr3-32849074-32849871@si:dkey-16l2.20
0.0905969	si:dkey-16l2.20	chr3-32851790-32853140	8.67061	2.14909e-18	Superficial_Epithelial	Intron	6195	si:dkey-16l2.20	chr3-32851790-32853140@si:dkey-16l2.20
0.0626184	si:dkey-16l2.20	chr3-32853804-32854352	8.24487	8.26695e-17	Superficial_Epithelial	3' UTR	4983	si:dkey-16l2.20	chr3-32853804-32854352@si:dkey-16l2.20
0.0517613	ccdc103	chr3-33396653-33397073	3.99485	3.23672e-05	Superficial_Epithelial	3' UTR	-1420	si:dkey-283b1.6	chr3-33396653-33397073@ccdc103
0.0643641	ccdc103	chr3-33414214-33414792	5.74281	4.65604e-09	Superficial_Epithelial	Exon	3034	abi3a	chr3-33414214-33414792@ccdc103
0.051271	rpl23	chr3-33472444-33473509	2.15843	0.015447	Superficial_Epithelial	Exon	-2722	sgsm3	chr3-33472444-33473509@rpl23
0.0513344	gtpbp1	chr3-33440214-33441574	4.34233	7.04904e-06	Superficial_Epithelial	Promoter	0	gtpbp1	chr3-33440214-33441574@gtpbp1
0.0569588	gtpbp1	chr3-33461996-33462713	6.33275	1.20417e-10	Superficial_Epithelial	3' UTR	7009	sgsm3	chr3-33461996-33462713@gtpbp1
0.0680712	alkbh7	chr3-33885729-33886112	6.73786	8.03706e-12	Superficial_Epithelial	Intron	-4778	cacna1aa	chr3-33885729-33886112@alkbh7
0.0636522	timm29	chr3-34227127-34227306	7.58058	1.72001e-14	Superficial_Epithelial	Intron	-6723	znf207a	chr3-34227127-34227306@timm29
0.0520027	tnrc6c1	chr3-34355415-34356048	5.23343	8.31968e-08	Superficial_Epithelial	Intergenic	-3167	NA	chr3-34355415-34356048@tnrc6c1
0.0715349	sept9a	chr3-34546357-34547558	2.58283	0.00489966	Superficial_Epithelial	Promoter	0	sept9a	chr3-34546357-34547558@sept9a
0.0745804	sept9a	chr3-34560090-34561980	2.47428	0.00667524	Superficial_Epithelial	Promoter	0	sept9a	chr3-34560090-34561980@sept9a
0.0503845	zgc:163143	chr3-34573200-34573527	4.62821	1.84424e-06	Superficial_Epithelial	Exon	-11576	sept9a	chr3-34573200-34573527@zgc:163143
0.08167	sept9a	chr3-34582277-34584281	3.36338	0.000384966	Superficial_Epithelial	Intron	2122	sept9a	chr3-34582277-34584281@sept9a
0.139907	itga3a	chr3-34845908-34846674	3.92338	4.36583e-05	Superficial_Epithelial	Promoter	0	itga3a	chr3-34845908-34846674@itga3a
0.0908274	itga3a	chr3-34851242-34852006	4.06433	2.40857e-05	Superficial_Epithelial	Intron	5041	itga3a	chr3-34851242-34852006@itga3a
0.0705024	itga3a	chr3-34853739-34854845	1.85924	0.0314965	Superficial_Epithelial	Intron	7538	itga3a	chr3-34853739-34854845@itga3a
0.0903435	itga3a	chr3-34859135-34859485	4.50089	3.3835e-06	Superficial_Epithelial	Intron	12934	itga3a	chr3-34859135-34859485@itga3a
0.108052	itga3a	chr3-34863971-34864593	2.82574	0.00235859	Superficial_Epithelial	Intron	-12473	itga3a	chr3-34863971-34864593@itga3a
0.071988	itga3a	chr3-34869010-34869511	2.52749	0.00574404	Superficial_Epithelial	Intron	-7555	itga3a	chr3-34869010-34869511@itga3a
0.0783481	itga3a	chr3-34873339-34875005	1.69202	0.0453206	Superficial_Epithelial	Exon	-2061	itga3a	chr3-34873339-34875005@itga3a
0.0529472	prkcbb	chr3-34991928-34992433	4.41563	5.03576e-06	Superficial_Epithelial	Exon	3258	smarce1	chr3-34991928-34992433@prkcbb
0.0665699	prkcbb	chr3-35005051-35006153	4.44395	4.41606e-06	Superficial_Epithelial	Promoter	0	prkcbb	chr3-35005051-35006153@prkcbb
0.0527471	zgc:86896	chr3-36275404-36276711	3.63186	0.000140691	Superficial_Epithelial	Promoter	0	zgc:86896	chr3-36275404-36276711@zgc:86896
-0.0620934	ppl	chr3-36435018-36436058	-2.18595	0.0144097	Superficial_Epithelial	Intron	2293	rogdi	chr3-36435018-36436058@ppl
0.0603265	ppl	chr3-36457095-36459568	3.21239	0.000658176	Superficial_Epithelial	Promoter	0	glyr1	chr3-36457095-36459568@ppl
0.0603428	ppl	chr3-36469436-36470100	3.41863	0.000314687	Superficial_Epithelial	Exon	-11271	glyr1	chr3-36469436-36470100@ppl
0.102889	ppl	chr3-36487704-36488949	4.83832	6.5472e-07	Superficial_Epithelial	Intergenic	-5718	ppl	chr3-36487704-36488949@ppl
0.0513774	gspt1l	chr3-36606117-36607202	2.71588	0.00330501	Superficial_Epithelial	Promoter	0	si:dkeyp-72e1.6	chr3-36606117-36607202@gspt1l
0.052407	gosr2	chr3-37644353-37645354	4.41675	5.00975e-06	Superficial_Epithelial	Intron	4035	LOC108182894	chr3-37644353-37645354@gosr2
0.0514978	si:dkey-260c8.6	chr3-37740828-37741004	5.31017	5.47618e-08	Superficial_Epithelial	Exon	17483	si:dkey-260c8.6	chr3-37740828-37741004@si:dkey-260c8.6
0.0704275	kcnj19a	chr3-38745190-38745615	3.6198	0.000147416	Superficial_Epithelial	Promoter	0	si:ch211-198m17.1	chr3-38745190-38745615@kcnj19a
0.130568	kcnj19a	chr3-38816669-38816948	7.39669	6.98116e-14	Superficial_Epithelial	Intron	23170	kcnj19a	chr3-38816669-38816948@kcnj19a
0.175302	kcnj19a	chr3-38845307-38846342	7.91446	1.24163e-15	Superficial_Epithelial	Intron	51808	kcnj19a	chr3-38845307-38846342@kcnj19a
0.0615071	svilc	chr3-39099317-39100104	1.75789	0.0393833	Superficial_Epithelial	Promoter	0	tmem98	chr3-39099317-39100104@svilc
0.0607358	tmem98	chr3-39124312-39124903	5.06335	2.05976e-07	Superficial_Epithelial	Exon	24596	tmem98	chr3-39124312-39124903@tmem98
0.0634657	svilc	chr3-39105587-39105932	3.61318	0.000151231	Superficial_Epithelial	5' UTR	5871	tmem98	chr3-39105587-39105932@svilc
0.0781087	svilc	chr3-39139533-39140227	2.5339	0.00564003	Superficial_Epithelial	Intron	12251	svilc	chr3-39139533-39140227@svilc
0.0595616	svilc	chr3-39152163-39153125	2.26485	0.0117609	Superficial_Epithelial	Promoter	0	svilc	chr3-39152163-39153125@svilc
0.069131	svilc	chr3-39157876-39159055	2.08796	0.0184006	Superficial_Epithelial	Intron	-5398	svilc	chr3-39157876-39159055@svilc
0.0515345	svilc	chr3-39169129-39169718	1.81632	0.0346603	Superficial_Epithelial	Intron	2250	svilc	chr3-39169129-39169718@svilc
0.106049	svilc	chr3-39172775-39173533	4.19049	1.39175e-05	Superficial_Epithelial	Promoter	-807	svilc	chr3-39172775-39173533@svilc
0.0628817	svilc	chr3-39174739-39175318	2.39874	0.00822585	Superficial_Epithelial	Downstream (<1kb)	-2771	svilc	chr3-39174739-39175318@svilc
0.0686576	CU464118.1	chr3-39375578-39377052	1.71876	0.0428291	Superficial_Epithelial	Intron	-12513	arhgap23a	chr3-39375578-39377052@CU464118.1
0.0754364	CU464118.1	chr3-39389064-39389989	1.67742	0.04673	Superficial_Epithelial	Intron	-25999	arhgap23a	chr3-39389064-39389989@CU464118.1
-0.0635895	zgc:100868	chr3-39420227-39421153	-4.22127	1.21462e-05	Superficial_Epithelial	Intron	33750	NA	chr3-39420227-39421153@zgc:100868
0.0858731	CU464118.1	chr3-39428980-39430061	2.26613	0.0117216	Superficial_Epithelial	Intron	24842	NA	chr3-39428980-39430061@CU464118.1
0.0831767	CU464118.1	chr3-39433924-39434442	2.27594	0.0114247	Superficial_Epithelial	Intron	20461	NA	chr3-39433924-39434442@CU464118.1
0.0954408	CU464118.1	chr3-39454368-39455405	2.93489	0.00166834	Superficial_Epithelial	Promoter	0	NA	chr3-39454368-39455405@CU464118.1
0.0633471	zgc:100868	chr3-39472717-39473556	3.247	0.000583134	Superficial_Epithelial	3' UTR	14926	zgc:100868	chr3-39472717-39473556@zgc:100868
0.0777004	zgc:100868	chr3-39474847-39475448	5.52685	1.63013e-08	Superficial_Epithelial	3' UTR	13034	zgc:100868	chr3-39474847-39475448@zgc:100868
0.0635825	zgc:100868	chr3-39486349-39487051	3.94923	3.92008e-05	Superficial_Epithelial	Exon	1431	zgc:100868	chr3-39486349-39487051@zgc:100868
0.119336	zgc:100868	chr3-39488314-39489165	5.47499	2.18773e-08	Superficial_Epithelial	Promoter	0	zgc:100868	chr3-39488314-39489165@zgc:100868
0.0662134	zgc:100868	chr3-39525682-39526984	3.95666	3.80026e-05	Superficial_Epithelial	Intergenic	-13030	zgc:165423	chr3-39525682-39526984@zgc:100868
0.0875649	llgl1	chr3-40029661-40030339	9.18388	2.07911e-20	Superficial_Epithelial	Intron	21086	llgl1	chr3-40029661-40030339@llgl1
0.086732	myo15aa	chr3-40099799-40100218	8.51321	8.45927e-18	Superficial_Epithelial	Exon	-10998	NA	chr3-40099799-40100218@myo15aa
0.115676	AL928657.2	chr3-40390445-40390934	15.3247	2.6142e-53	Superficial_Epithelial	Intergenic	14219	NA	chr3-40390445-40390934@AL928657.2
0.0674632	slc29a4	chr3-40315345-40317079	5.13015	1.44754e-07	Superficial_Epithelial	Promoter	0	slc29a4	chr3-40315345-40317079@slc29a4
0.0770419	actb2	chr3-40524995-40527599	6.38384	8.63495e-11	Superficial_Epithelial	Promoter	734	actb2	chr3-40524995-40527599@actb2
0.0532282	actb2	chr3-40534779-40538403	5.00288	2.82402e-07	Superficial_Epithelial	Intergenic	-4975	actb2	chr3-40534779-40538403@actb2
0.0877988	cyp3c3	chr3-40953505-40954332	9.53754	7.3129e-22	Superficial_Epithelial	5' UTR	1448	cyp3c3	chr3-40953505-40954332@cyp3c3
0.0662719	sdk1a	chr3-41257218-41258275	4.32179	7.7384e-06	Superficial_Epithelial	Intron	34000	sdk1a	chr3-41257218-41258275@sdk1a
0.0569472	card11	chr3-41521576-41522270	3.86512	5.55183e-05	Superficial_Epithelial	Intergenic	-9366	NA	chr3-41521576-41522270@card11
0.0544775	card11	chr3-41590072-41591235	3.15578	0.00080034	Superficial_Epithelial	Intron	4774	card11	chr3-41590072-41591235@card11
0.051875	card11	chr3-41598883-41599880	3.81233	6.88309e-05	Superficial_Epithelial	Intron	13585	card11	chr3-41598883-41599880@card11
0.0566951	card11	chr3-41608065-41609375	3.69931	0.000108092	Superficial_Epithelial	Exon	-9650	card11	chr3-41608065-41609375@card11
0.0576221	ttyh3a	chr3-42010132-42011061	3.42442	0.000308057	Superficial_Epithelial	Intron	5632	ttyh3a	chr3-42010132-42011061@ttyh3a
0.0523352	BX908797.1	chr3-42955624-42956343	5.62814	9.10812e-09	Superficial_Epithelial	3' UTR	11355	mafk	chr3-42955624-42956343@BX908797.1
0.0507222	zfand2a	chr3-43388013-43389621	6.21959	2.49225e-10	Superficial_Epithelial	Intron	13442	zfand2a	chr3-43388013-43389621@zfand2a
0.0550085	zfand2a	chr3-43391741-43392169	6.51137	3.72352e-11	Superficial_Epithelial	Intron	17170	zfand2a	chr3-43391741-43392169@zfand2a
0.130514	zfand2a	chr3-43394134-43396357	12.9793	8.01716e-39	Superficial_Epithelial	3' UTR	19563	zfand2a	chr3-43394134-43396357@zfand2a
0.0531477	kctd5a	chr3-45254004-45254853	2.58191	0.00491281	Superficial_Epithelial	Intergenic	-3080	usp31	chr3-45254004-45254853@kctd5a
0.0544566	il21r.1	chr3-45265053-45265982	3.15567	0.000800641	Superficial_Epithelial	Exon	-14129	usp31	chr3-45265053-45265982@il21r.1
0.0527596	gpr146	chr3-45622083-45622376	4.49281	3.5145e-06	Superficial_Epithelial	Intergenic	-12701	mir2195	chr3-45622083-45622376@gpr146
0.051515	cdip1	chr3-46409573-46410899	3.35313	0.000399512	Superficial_Epithelial	Promoter	0	cdip1	chr3-46409573-46410899@cdip1
0.0500062	dnm2a	chr3-47157022-47157986	3.25443	0.000568093	Superficial_Epithelial	Exon	25910	dnm2a	chr3-47157022-47157986@dnm2a
0.069372	tnfsf14	chr3-47303533-47303834	5.27403	6.67283e-08	Superficial_Epithelial	Intergenic	-9168	tnfsf18	chr3-47303533-47303834@tnfsf14
0.10059	ppap2d	chr3-47252025-47252876	2.31378	0.0103398	Superficial_Epithelial	Exon	6261	tnfsf14	chr3-47252025-47252876@ppap2d
0.127386	ppap2d	chr3-47262031-47263641	2.98495	0.00141812	Superficial_Epithelial	Intergenic	16267	tnfsf14	chr3-47262031-47263641@ppap2d
0.100785	ppap2d	chr3-47287486-47288666	1.97462	0.0241558	Superficial_Epithelial	Intron	5699	tnfsf18	chr3-47287486-47288666@ppap2d
0.0556391	ppap2d	chr3-47315345-47315919	1.91074	0.0280189	Superficial_Epithelial	Intergenic	-6575	ppap2d	chr3-47315345-47315919@ppap2d
0.0653119	ppap2d	chr3-47317965-47318566	1.67777	0.0466964	Superficial_Epithelial	Intergenic	-3928	ppap2d	chr3-47317965-47318566@ppap2d
0.0858754	ppap2d	chr3-47322173-47324172	1.75045	0.0400204	Superficial_Epithelial	Promoter	0	ppap2d	chr3-47322173-47324172@ppap2d
0.0828423	ppap2d	chr3-47325707-47326743	1.77013	0.0383524	Superficial_Epithelial	Intron	3213	ppap2d	chr3-47325707-47326743@ppap2d
0.090966	ppap2d	chr3-47339258-47340590	1.94573	0.0258438	Superficial_Epithelial	Intron	16764	ppap2d	chr3-47339258-47340590@ppap2d
0.0806706	ppap2d	chr3-47341834-47342828	1.87271	0.0305542	Superficial_Epithelial	Intron	19340	ppap2d	chr3-47341834-47342828@ppap2d
0.0752123	ppap2d	chr3-47348240-47349047	1.7621	0.0390265	Superficial_Epithelial	Intron	25746	ppap2d	chr3-47348240-47349047@ppap2d
0.115129	ppap2d	chr3-47383821-47385049	2.77028	0.00280045	Superficial_Epithelial	Exon	61327	ppap2d	chr3-47383821-47385049@ppap2d
0.0750729	ppap2d	chr3-47389056-47389538	3.64432	0.000134052	Superficial_Epithelial	Intergenic	66562	ppap2d	chr3-47389056-47389538@ppap2d
0.0872625	ppap2d	chr3-47392188-47392897	3.27499	0.000528333	Superficial_Epithelial	Intergenic	-67591	NA	chr3-47392188-47392897@ppap2d
0.0982285	ppap2d	chr3-47394951-47395807	3.43454	0.000296783	Superficial_Epithelial	Intergenic	-64681	NA	chr3-47394951-47395807@ppap2d
0.119245	ppap2d	chr3-47408347-47409443	2.77189	0.00278659	Superficial_Epithelial	Intergenic	-51045	NA	chr3-47408347-47409443@ppap2d
0.0610401	znf750	chr3-48269023-48269862	3.73441	9.40768e-05	Superficial_Epithelial	Intron	-9734	znf750	chr3-48269023-48269862@znf750
0.0622271	znf750	chr3-48273993-48275241	4.17674	1.47858e-05	Superficial_Epithelial	Intron	-14704	znf750	chr3-48273993-48275241@znf750
0.0742572	metrnla	chr3-48378961-48379359	3.06024	0.0011058	Superficial_Epithelial	Intergenic	86042	NA	chr3-48378961-48379359@metrnla
0.100541	metrnla	chr3-48381369-48382398	2.66342	0.00386753	Superficial_Epithelial	Intergenic	83003	NA	chr3-48381369-48382398@metrnla
0.0969134	metrnla	chr3-48429474-48430895	2.25999	0.0119108	Superficial_Epithelial	Intergenic	34506	NA	chr3-48429474-48430895@metrnla
0.111504	metrnla	chr3-48460660-48460848	7.16027	4.02594e-13	Superficial_Epithelial	Downstream (<1kb)	4553	NA	chr3-48460660-48460848@metrnla
0.111544	metrnla	chr3-48473152-48473877	3.03721	0.00119391	Superficial_Epithelial	Promoter	0	metrnla	chr3-48473152-48473877@metrnla
0.142955	metrnla	chr3-48474541-48476135	3.15661	0.000798081	Superficial_Epithelial	Intron	1195	metrnla	chr3-48474541-48476135@metrnla
0.145096	metrnla	chr3-48541647-48542450	4.21526	1.24744e-05	Superficial_Epithelial	Intergenic	17456	atp5pd	chr3-48541647-48542450@metrnla
0.0660044	metrnla	chr3-48561447-48561996	1.74023	0.0409095	Superficial_Epithelial	Promoter	335	slc16a5b	chr3-48561447-48561996@metrnla
0.057764	ndel1b	chr3-48591720-48594025	6.03853	7.77635e-10	Superficial_Epithelial	Exon	9446	ndel1b	chr3-48591720-48594025@ndel1b
0.0744827	hs3st3b1a	chr3-48766827-48767603	3.4764	0.0002541	Superficial_Epithelial	Intergenic	-50405	si:ch211-114m9.1	chr3-48766827-48767603@hs3st3b1a
0.0671284	hs3st3b1a	chr3-48816732-48816931	3.62924	0.000142127	Superficial_Epithelial	Intergenic	-25987	hs3st3b1a	chr3-48816732-48816931@hs3st3b1a
0.0724342	cdc42ep4a	chr3-50943602-50943896	3.66052	0.000125852	Superficial_Epithelial	Intergenic	10711	cdc42ep4a	chr3-50943602-50943896@cdc42ep4a
0.0520514	sdk2a	chr3-51049092-51049503	3.72815	9.64454e-05	Superficial_Epithelial	Intron	-50515	cdc42ep4a	chr3-51049092-51049503@sdk2a
0.0552984	sdk2a	chr3-51136697-51137775	6.26981	1.8074e-10	Superficial_Epithelial	Intron	5167	sdk2a	chr3-51136697-51137775@sdk2a
0.0501656	sdk2a	chr3-51186118-51186937	4.73099	1.11711e-06	Superficial_Epithelial	Intergenic	-43176	sdk2a	chr3-51186118-51186937@sdk2a
0.0636796	sdk2a	chr3-51238780-51239350	5.24016	8.0219e-08	Superficial_Epithelial	Intergenic	-95838	sdk2a	chr3-51238780-51239350@sdk2a
0.0737949	CR854839.1	chr3-51448138-51450059	5.39546	3.41733e-08	Superficial_Epithelial	Intergenic	30716	si:dkey-54h16.1	chr3-51448138-51450059@CR854839.1
0.0514052	baiap2a	chr3-51684487-51685467	1.7361	0.0412732	Superficial_Epithelial	Promoter	0	baiap2a	chr3-51684487-51685467@baiap2a
0.0566674	baiap2a	chr3-51697165-51697765	3.40301	0.000333244	Superficial_Epithelial	Intron	12104	baiap2a	chr3-51697165-51697765@baiap2a
0.0766709	baiap2a	chr3-51701500-51702662	3.05117	0.00113976	Superficial_Epithelial	Intron	16439	baiap2a	chr3-51701500-51702662@baiap2a
0.0540949	baiap2a	chr3-51776481-51777777	1.7506	0.0400071	Superficial_Epithelial	Intron	91420	baiap2a	chr3-51776481-51777777@baiap2a
0.0508066	FUT9.1	chr3-52073621-52074997	4.2829	9.2236e-06	Superficial_Epithelial	Intron	-3801	NA	chr3-52073621-52074997@FUT9.1
0.0580933	FUT9	chr3-52095468-52096095	6.36158	9.9845e-11	Superficial_Epithelial	Intron	1974	zgc:165582	chr3-52095468-52096095@FUT9
0.138095	notch3	chr3-53499794-53500950	2.26395	0.0117885	Superficial_Epithelial	Exon	7630	shfl	chr3-53499794-53500950@notch3
0.101357	notch3	chr3-53554023-53555329	2.49964	0.00621591	Superficial_Epithelial	Intron	4079	notch3	chr3-53554023-53555329@notch3
0.12023	notch3	chr3-53581332-53582484	2.157	0.0155028	Superficial_Epithelial	Intergenic	-21751	notch3	chr3-53581332-53582484@notch3
0.102414	notch3	chr3-53585071-53585580	1.96588	0.024656	Superficial_Epithelial	Intergenic	-25490	notch3	chr3-53585071-53585580@notch3
0.120837	notch3	chr3-53586846-53588025	1.94361	0.0259714	Superficial_Epithelial	Intergenic	-27265	notch3	chr3-53586846-53588025@notch3
0.0941794	notch3	chr3-53591463-53591666	3.2746	0.000529059	Superficial_Epithelial	Intergenic	-31882	notch3	chr3-53591463-53591666@notch3
0.162045	notch3	chr3-53593596-53594713	3.0555	0.00112342	Superficial_Epithelial	Intergenic	-34015	notch3	chr3-53593596-53594713@notch3
0.0564098	notch3	chr3-53606028-53606341	2.76492	0.0028468	Superficial_Epithelial	Intergenic	-46447	notch3	chr3-53606028-53606341@notch3
0.0922423	notch3	chr3-53617971-53618809	2.21092	0.0135205	Superficial_Epithelial	Intergenic	-58390	notch3	chr3-53617971-53618809@notch3
0.0732862	notch3	chr3-53631828-53632490	2.72304	0.00323417	Superficial_Epithelial	Intergenic	56938	NA	chr3-53631828-53632490@notch3
0.0919839	notch3	chr3-53638173-53638807	2.67089	0.00378247	Superficial_Epithelial	Intergenic	50621	NA	chr3-53638173-53638807@notch3
0.0547884	notch3	chr3-53645963-53646464	1.66797	0.047661	Superficial_Epithelial	Intergenic	42964	NA	chr3-53645963-53646464@notch3
0.104967	notch3	chr3-53654031-53654449	4.49461	3.48483e-06	Superficial_Epithelial	Intergenic	34979	NA	chr3-53654031-53654449@notch3
0.261659	notch3	chr3-53655204-53656437	6.70014	1.04107e-11	Superficial_Epithelial	Intergenic	32991	NA	chr3-53655204-53656437@notch3
0.0685473	trip10a	chr3-54474241-54475065	2.91924	0.00175445	Superficial_Epithelial	Exon	25289	trip10a	chr3-54474241-54475065@trip10a
0.0681952	sc:d0202.1	chr3-54699326-54700329	2.77957	0.00272151	Superficial_Epithelial	Intergenic	-30141	s1pr2	chr3-54699326-54700329@sc:d0202.1
0.081722	sc:d0202.1	chr3-54717586-54718791	4.24057	1.11476e-05	Superficial_Epithelial	Intergenic	-25278	icam3	chr3-54717586-54718791@sc:d0202.1
0.0633261	sc:d0202.1	chr3-54743647-54745086	2.11211	0.0173384	Superficial_Epithelial	Promoter	0	icam3	chr3-54743647-54745086@sc:d0202.1
0.100088	sc:d0202.1	chr3-54799714-54800891	5.71967	5.33659e-09	Superficial_Epithelial	Intron	23239	LOC566194	chr3-54799714-54800891@sc:d0202.1
0.0782985	sc:d0202.1	chr3-54803228-54803449	4.43545	4.59398e-06	Superficial_Epithelial	Intron	26753	LOC566194	chr3-54803228-54803449@sc:d0202.1
0.103179	sc:d0202.1	chr3-54820481-54822028	4.86059	5.85193e-07	Superficial_Epithelial	Intergenic	24416	ubald1b	chr3-54820481-54822028@sc:d0202.1
0.0582965	ubald1b	chr3-54788106-54788325	4.35374	6.69167e-06	Superficial_Epithelial	Intron	11631	LOC566194	chr3-54788106-54788325@ubald1b
0.0545915	ubald1b	chr3-54799714-54800891	2.05674	0.0198556	Superficial_Epithelial	Intron	23239	LOC566194	chr3-54799714-54800891@ubald1b
0.0806866	ubald1b	chr3-54820481-54822028	3.68068	0.000116307	Superficial_Epithelial	Intergenic	24416	ubald1b	chr3-54820481-54822028@ubald1b
0.0639223	ubald1b	chr3-54856539-54856757	4.98278	3.13391e-07	Superficial_Epithelial	Exon	7456	mgrn1b	chr3-54856539-54856757@ubald1b
0.0518806	ubald1b	chr3-54916461-54917482	2.15239	0.0156833	Superficial_Epithelial	Exon	28679	aanat2	chr3-54916461-54917482@ubald1b
0.0535877	rhbdf1a	chr3-54916461-54917482	2.00818	0.0223122	Superficial_Epithelial	Exon	28679	aanat2	chr3-54916461-54917482@rhbdf1a
0.0513443	rhbdf1a	chr3-54952723-54953474	2.31179	0.0103947	Superficial_Epithelial	Intron	39460	rhbdf1a	chr3-54952723-54953474@rhbdf1a
0.0579514	rhbdf1a	chr3-54958954-54960551	1.93879	0.0262636	Superficial_Epithelial	Intron	32383	rhbdf1a	chr3-54958954-54960551@rhbdf1a
0.0637502	rhbdf1a	chr3-54970314-54970944	3.28409	0.00051157	Superficial_Epithelial	Intron	21990	rhbdf1a	chr3-54970314-54970944@rhbdf1a
0.0607427	rhbdf1a	chr3-54971951-54973019	2.12082	0.0169686	Superficial_Epithelial	Intron	19915	rhbdf1a	chr3-54971951-54973019@rhbdf1a
0.059591	rhbdf1a	chr3-54978957-54980658	2.76394	0.00285544	Superficial_Epithelial	Intron	12276	rhbdf1a	chr3-54978957-54980658@rhbdf1a
0.0513714	rhbdf1a	chr3-54985096-54985848	2.05826	0.0197827	Superficial_Epithelial	Intron	7086	rhbdf1a	chr3-54985096-54985848@rhbdf1a
0.0655709	rhbdf1a	chr3-54991810-54993353	2.60753	0.00455993	Superficial_Epithelial	Promoter	0	rhbdf1a	chr3-54991810-54993353@rhbdf1a
0.0629587	rhbdf1a	chr3-55035373-55036408	2.18192	0.0145576	Superficial_Epithelial	Intron	3688	mpg	chr3-55035373-55036408@rhbdf1a
0.10332	hbaa1	chr3-55093509-55094253	7.00109	1.26992e-12	Superficial_Epithelial	Promoter	0	hbaa2	chr3-55093509-55094253@hbaa1
0.0565678	axin2	chr3-55632094-55633622	3.45243	0.000277781	Superficial_Epithelial	Intron	15697	axin2	chr3-55632094-55633622@axin2
0.0509047	axin2	chr3-55646414-55647168	3.8958	4.89368e-05	Superficial_Epithelial	Intron	2151	axin2	chr3-55646414-55647168@axin2
0.0725448	prkcab	chr3-56252429-56253215	6.00973	9.29146e-10	Superficial_Epithelial	Intron	-23131	si:ch73-374l24.1	chr3-56252429-56253215@prkcab
0.0723268	CR759836.1	chr3-56618796-56619227	6.60655	1.96683e-11	Superficial_Epithelial	Promoter	0	NA	chr3-56618796-56619227@CR759836.1
0.0821274	CR759836.1	chr3-56645028-56645270	8.19459	1.2572e-16	Superficial_Epithelial	Promoter	-440	LOC101885757	chr3-56645028-56645270@CR759836.1
0.0781518	rnf213a	chr3-56699127-56700261	4.05712	2.48411e-05	Superficial_Epithelial	Promoter	0	rnf213a	chr3-56699127-56700261@rnf213a
0.0651582	rnf213a	chr3-56701439-56702153	3.12328	0.000894229	Superficial_Epithelial	Intron	2252	rnf213a	chr3-56701439-56702153@rnf213a
0.153989	rnf213a	chr3-56704670-56705404	8.69842	1.68276e-18	Superficial_Epithelial	5' UTR	5483	rnf213a	chr3-56704670-56705404@rnf213a
0.0555088	rnf213a	chr3-56707701-56708361	3.73504	9.38434e-05	Superficial_Epithelial	Intron	8514	rnf213a	chr3-56707701-56708361@rnf213a
0.0501407	rnf213a	chr3-56746988-56747838	4.17789	1.4711e-05	Superficial_Epithelial	Exon	47801	rnf213a	chr3-56746988-56747838@rnf213a
0.0521773	rnf213a	chr3-56762964-56763587	3.89004	5.01148e-05	Superficial_Epithelial	Intron	63777	rnf213a	chr3-56762964-56763587@rnf213a
0.0525894	rnf213a	chr3-56789209-56789571	5.26531	6.9977e-08	Superficial_Epithelial	Intron	81759	zgc:112148	chr3-56789209-56789571@rnf213a
0.0512266	rnf213a	chr3-56791165-56791903	4.04255	2.64369e-05	Superficial_Epithelial	Exon	79427	zgc:112148	chr3-56791165-56791903@rnf213a
0.0526135	rnf213a	chr3-56794352-56794963	4.19567	1.36033e-05	Superficial_Epithelial	Intron	76367	zgc:112148	chr3-56794352-56794963@rnf213a
0.0579407	otop2	chr3-56904539-56904819	7.25448	2.01602e-13	Superficial_Epithelial	Promoter	-284	otop2	chr3-56904539-56904819@otop2
0.0712534	bahcc1a	chr3-57075832-57076992	3.6522	0.000130001	Superficial_Epithelial	Intron	37799	LOC797750	chr3-57075832-57076992@bahcc1a
0.0735094	cyth1a.1	chr3-57525602-57526612	4.08435	2.21003e-05	Superficial_Epithelial	Intron	3711	cyth1a	chr3-57525602-57526612@cyth1a.1
0.053045	cyth1a.1	chr3-57533609-57534816	2.11906	0.0170429	Superficial_Epithelial	Intergenic	-3286	cyth1a	chr3-57533609-57534816@cyth1a.1
0.0614855	timp2b	chr3-57621879-57622476	2.70292	0.00343662	Superficial_Epithelial	Intron	8315	usp36	chr3-57621879-57622476@timp2b
0.0579439	timp2b	chr3-57662922-57664203	2.56594	0.00514479	Superficial_Epithelial	Intron	2315	timp2b	chr3-57662922-57664203@timp2b
0.0574071	timp2b	chr3-57683589-57684708	1.84128	0.0327901	Superficial_Epithelial	Intergenic	-16593	timp2b	chr3-57683589-57684708@timp2b
0.0974476	timp2b	chr3-57697153-57698188	5.71166	5.59406e-09	Superficial_Epithelial	Downstream (1-2kb)	13523	lgals3bp.3	chr3-57697153-57698188@timp2b
0.0724348	lgals3bpa	chr3-57711193-57712112	5.06726	2.01794e-07	Superficial_Epithelial	Promoter	0	lgals3bp.3	chr3-57711193-57712112@lgals3bpa
0.0828475	si:ch211-256e16.4	chr3-58036552-58036921	6.8299	4.24865e-12	Superficial_Epithelial	Downstream (2-3kb)	9398	NA	chr3-58036552-58036921@si:ch211-256e16.4
0.062194	si:ch211-256e16.8	chr3-58085370-58085705	7.18045	3.47405e-13	Superficial_Epithelial	Intergenic	-6507	LOC101886370	chr3-58085370-58085705@si:ch211-256e16.8
0.189111	si:ch211-256e16.7	chr3-58085370-58085705	24.3845	1.24953e-131	Superficial_Epithelial	Intergenic	-6507	LOC101886370	chr3-58085370-58085705@si:ch211-256e16.7
0.112243	si:ch211-256e16.4	chr3-58085370-58085705	8.04713	4.23773e-16	Superficial_Epithelial	Intergenic	-6507	LOC101886370	chr3-58085370-58085705@si:ch211-256e16.4
0.237697	si:ch211-256e16.4	chr3-58116426-58116893	20.8256	1.2694e-96	Superficial_Epithelial	Promoter	-112	LOC110439304	chr3-58116426-58116893@si:ch211-256e16.4
0.080422	si:ch211-256e16.4	chr3-58119188-58119514	5.57601	1.23051e-08	Superficial_Epithelial	Promoter	-57	si:ch211-256e16.4	chr3-58119188-58119514@si:ch211-256e16.4
0.0509317	vwa3a	chr3-58318460-58318739	9.95375	1.2143e-23	Superficial_Epithelial	Intergenic	-26123	NA	chr3-58318460-58318739@vwa3a
0.0997859	cdr2a	chr3-58441244-58442290	7.08638	6.88306e-13	Superficial_Epithelial	Intron	12999	cdr2a	chr3-58441244-58442290@cdr2a
0.0514409	cdr2a	chr3-58450703-58451050	3.84493	6.02943e-05	Superficial_Epithelial	Intron	4239	cdr2a	chr3-58450703-58451050@cdr2a
0.0563494	nptx1l	chr3-59468903-59469648	3.54441	0.00019675	Superficial_Epithelial	Exon	2774	nptx1l	chr3-59468903-59469648@nptx1l
0.0582299	si:ch73-364h19.1	chr3-60151791-60152723	5.63881	8.5616e-09	Superficial_Epithelial	Intron	-9261	si:ch211-120g10.1	chr3-60151791-60152723@si:ch73-364h19.1
0.103125	si:ch211-214b16.4	chr3-60309838-60310275	10.2325	7.09247e-25	Superficial_Epithelial	Promoter	-901	NA	chr3-60309838-60310275@si:ch211-214b16.4
0.143293	si:ch211-214b16.4	chr3-60319799-60320962	13.0741	2.31528e-39	Superficial_Epithelial	Intergenic	-3681	si:ch211-214b16.2	chr3-60319799-60320962@si:ch211-214b16.4
0.0573953	si:ch211-214b16.4	chr3-60330588-60331423	5.98584	1.07637e-09	Superficial_Epithelial	Intergenic	-14470	si:ch211-214b16.2	chr3-60330588-60331423@si:ch211-214b16.4
0.103184	si:ch211-214b16.4	chr3-60404902-60406449	7.98595	6.97205e-16	Superficial_Epithelial	Intergenic	-3076	si:ch211-214b16.3	chr3-60404902-60406449@si:ch211-214b16.4
0.0594447	DXO	chr3-60886383-60887187	6.14075	4.10662e-10	Superficial_Epithelial	Promoter	0	pitpnc1a	chr3-60886383-60887187@DXO
0.050724	pvalb8	chr3-61134812-61135267	7.60504	1.42407e-14	Superficial_Epithelial	Intergenic	-18517	aimp2	chr3-61134812-61135267@pvalb8
0.106856	pvalb8	chr3-61150883-61151135	9.8208	4.58056e-23	Superficial_Epithelial	Intergenic	11615	pvalb8	chr3-61150883-61151135@pvalb8
0.151349	pvalb8	chr3-61162500-61162973	19.5592	1.72086e-85	Superficial_Epithelial	Promoter	0	pvalb8	chr3-61162500-61162973@pvalb8
0.0582591	si:dkey-111k8.2	chr3-61319323-61319563	6.11143	4.93702e-10	Superficial_Epithelial	Exon	15026	tecpr1b	chr3-61319323-61319563@si:dkey-111k8.2
0.0603048	si:dkey-111k8.2	chr3-61423455-61423838	7.86451	1.85272e-15	Superficial_Epithelial	Intron	3376	NA	chr3-61423455-61423838@si:dkey-111k8.2
0.0622474	baiap2l1b	chr3-61445781-61446584	3.95471	3.8313e-05	Superficial_Epithelial	Intron	25702	NA	chr3-61445781-61446584@baiap2l1b
0.0760739	baiap2l1b	chr3-61487969-61489137	3.84617	5.99893e-05	Superficial_Epithelial	Intron	5703	baiap2l1b	chr3-61487969-61489137@baiap2l1b
0.0511879	noxo1a	chr3-62159663-62160297	4.6192	1.92609e-06	Superficial_Epithelial	Promoter	-887	noxo1a	chr3-62159663-62160297@noxo1a
0.0591017	msgn1	chr4-207890-208081	4.04385	2.62905e-05	Superficial_Epithelial	Intron	3633	NA	chr4-207890-208081@msgn1
0.0502324	dynlt1	chr4-474783-475572	4.98851	3.0424e-07	Superficial_Epithelial	Intron	55124	NA	chr4-474783-475572@dynlt1
0.0599179	BX890562.2	chr4-499807-500123	5.33324	4.82365e-08	Superficial_Epithelial	Exon	-54144	NA	chr4-499807-500123@BX890562.2
0.0590038	pthlha	chr4-517257-517757	4.55087	2.67123e-06	Superficial_Epithelial	Intergenic	-36510	NA	chr4-517257-517757@pthlha
0.0849957	si:ch211-152c2.3	chr4-787402-787585	7.87624	1.68689e-15	Superficial_Epithelial	Intron	2060	mapre3b	chr4-787402-787585@si:ch211-152c2.3
0.0919499	si:ch211-152c2.3	chr4-839100-839749	4.78895	8.38277e-07	Superficial_Epithelial	Intron	-1281	sobpb	chr4-839100-839749@si:ch211-152c2.3
0.0513666	si:ch211-152c2.3	chr4-847004-848045	3.1825	0.000730041	Superficial_Epithelial	Intron	4994	NA	chr4-847004-848045@si:ch211-152c2.3
0.0785432	si:ch211-152c2.3	chr4-907223-907436	4.94402	3.82633e-07	Superficial_Epithelial	Exon	1385	mrap2b	chr4-907223-907436@si:ch211-152c2.3
0.0592744	slc38a4	chr4-1496574-1498146	2.40644	0.00805434	Superficial_Epithelial	Promoter	0	zmp:0000000711	chr4-1496574-1498146@slc38a4
0.0530008	slc38a4	chr4-1507697-1509050	1.8389	0.0329648	Superficial_Epithelial	Intergenic	-7666	slc38a4	chr4-1507697-1509050@slc38a4
0.0656368	slc38a2	chr4-1507697-1509050	2.20971	0.0135625	Superficial_Epithelial	Intergenic	-7666	slc38a4	chr4-1507697-1509050@slc38a2
0.0716362	slc38a4	chr4-1529961-1531925	3.1491	0.000818885	Superficial_Epithelial	Promoter	0	slc38a4	chr4-1529961-1531925@slc38a4
0.0556321	slc38a4	chr4-1535446-1536177	2.6713	0.00377791	Superficial_Epithelial	Intron	5159	slc38a4	chr4-1535446-1536177@slc38a4
0.0654354	slc38a4	chr4-1573234-1574032	3.29587	0.000490586	Superficial_Epithelial	Intergenic	-2857	LOC110439353	chr4-1573234-1574032@slc38a4
0.0506899	slc38a4	chr4-1574506-1575757	1.83847	0.0329968	Superficial_Epithelial	Intergenic	-1132	LOC110439353	chr4-1574506-1575757@slc38a4
0.0506006	slc38a4	chr4-1581773-1582725	1.67601	0.046868	Superficial_Epithelial	Intron	4884	LOC110439353	chr4-1581773-1582725@slc38a4
0.0751161	slc38a2	chr4-1529961-1531925	2.96507	0.00151308	Superficial_Epithelial	Promoter	0	slc38a4	chr4-1529961-1531925@slc38a2
0.0762604	slc38a2	chr4-1566442-1567427	2.58374	0.0048868	Superficial_Epithelial	3' UTR	-9462	LOC110439353	chr4-1566442-1567427@slc38a2
0.0626493	slc38a2	chr4-1569904-1570315	3.60756	0.000154547	Superficial_Epithelial	Intergenic	-6574	LOC110439353	chr4-1569904-1570315@slc38a2
0.0759099	slc38a2	chr4-1571622-1572679	2.38743	0.00848324	Superficial_Epithelial	Intergenic	-4210	LOC110439353	chr4-1571622-1572679@slc38a2
0.0598097	slc38a2	chr4-1573234-1574032	2.22966	0.012885	Superficial_Epithelial	Intergenic	-2857	LOC110439353	chr4-1573234-1574032@slc38a2
0.0631206	slc38a2	chr4-1574506-1575757	2.12898	0.0166281	Superficial_Epithelial	Intergenic	-1132	LOC110439353	chr4-1574506-1575757@slc38a2
0.0894606	slc38a2	chr4-1581773-1582725	2.88605	0.00195054	Superficial_Epithelial	Intron	4884	LOC110439353	chr4-1581773-1582725@slc38a2
0.0733294	slc38a2	chr4-1599705-1602042	3.08636	0.00101312	Superficial_Epithelial	Promoter	0	slc38a2	chr4-1599705-1602042@slc38a2
0.0544238	slc38a2	chr4-1608756-1609633	1.71787	0.0429104	Superficial_Epithelial	Exon	3090	slc38a2	chr4-1608756-1609633@slc38a2
0.0989687	slc38a2	chr4-1617378-1620165	3.84373	6.05894e-05	Superficial_Epithelial	Promoter	0	scaf11	chr4-1617378-1620165@slc38a2
0.0505774	CR847994.1	chr4-1605547-1606198	4.60976	2.01569e-06	Superficial_Epithelial	Promoter	0	slc38a2	chr4-1605547-1606198@CR847994.1
0.0566917	scaf11	chr4-1630739-1630911	6.46837	4.9532e-11	Superficial_Epithelial	Exon	10637	scaf11	chr4-1630739-1630911@scaf11
0.0592134	scaf11	chr4-1633766-1634093	6.87476	3.10477e-12	Superficial_Epithelial	Exon	13664	scaf11	chr4-1633766-1634093@scaf11
0.0512862	gas2l3	chr4-1693930-1694190	5.21818	9.03446e-08	Superficial_Epithelial	Exon	8909	NA	chr4-1693930-1694190@gas2l3
0.0594421	cmah	chr4-2227864-2228766	5.15943	1.23849e-07	Superficial_Epithelial	Promoter	0	cmah	chr4-2227864-2228766@cmah
0.0873455	phlda1	chr4-2280101-2280814	3.46994	0.000260286	Superficial_Epithelial	Intron	10286	LOC100334697	chr4-2280101-2280814@phlda1
0.067144	phlda1	chr4-2298581-2300248	2.12966	0.0165997	Superficial_Epithelial	Intergenic	28766	LOC100334697	chr4-2298581-2300248@phlda1
0.060918	phlda1	chr4-2349428-2351239	1.84202	0.0327361	Superficial_Epithelial	Promoter	0	phlda1	chr4-2349428-2351239@phlda1
0.0692069	phlda1	chr4-2448413-2449099	1.81126	0.0350504	Superficial_Epithelial	Intergenic	-8238	osbpl8	chr4-2448413-2449099@phlda1
0.123027	plekha5	chr4-3054203-3055181	4.0115	3.01665e-05	Superficial_Epithelial	Intron	8920	plekha5	chr4-3054203-3055181@plekha5
0.101591	plekha5	chr4-3077857-3079214	2.13957	0.0161946	Superficial_Epithelial	Intron	-13756	plekha5	chr4-3077857-3079214@plekha5
0.0693346	plekha5	chr4-3086894-3087565	1.88259	0.0298782	Superficial_Epithelial	Intron	-22793	plekha5	chr4-3086894-3087565@plekha5
0.0794407	plekha5	chr4-3095984-3096800	1.83847	0.0329967	Superficial_Epithelial	Intron	-31883	plekha5	chr4-3095984-3096800@plekha5
0.110074	plekha5	chr4-3101069-3102123	2.37179	0.00885116	Superficial_Epithelial	Intron	-36968	plekha5	chr4-3101069-3102123@plekha5
0.0567455	plekha5	chr4-3106944-3107429	2.55051	0.0053782	Superficial_Epithelial	Intron	37930	plekha5	chr4-3106944-3107429@plekha5
0.0973307	plekha5	chr4-3114930-3116455	2.32373	0.0100699	Superficial_Epithelial	Intron	28904	plekha5	chr4-3114930-3116455@plekha5
0.0526469	plekha5	chr4-3127933-3128478	1.95482	0.0253022	Superficial_Epithelial	Intron	16881	plekha5	chr4-3127933-3128478@plekha5
0.0523139	plekha5	chr4-3129686-3130347	2.23043	0.0128594	Superficial_Epithelial	Intron	15012	plekha5	chr4-3129686-3130347@plekha5
0.0905626	plekha5	chr4-3132712-3133801	1.89303	0.0291768	Superficial_Epithelial	Intron	11558	plekha5	chr4-3132712-3133801@plekha5
0.088767	plekha5	chr4-3142064-3142873	1.85762	0.0316112	Superficial_Epithelial	Intron	2486	plekha5	chr4-3142064-3142873@plekha5
0.0879362	plekha5	chr4-3144331-3145615	2.68853	0.00358835	Superficial_Epithelial	Promoter	0	plekha5	chr4-3144331-3145615@plekha5
0.0962782	plekha5	chr4-3186302-3187018	2.81313	0.00245308	Superficial_Epithelial	Intergenic	-40943	plekha5	chr4-3186302-3187018@plekha5
0.111276	plekha5	chr4-3188875-3189864	2.9361	0.00166186	Superficial_Epithelial	Intergenic	-43516	plekha5	chr4-3188875-3189864@plekha5
0.0603871	plekha5	chr4-3197867-3198381	1.97921	0.0238962	Superficial_Epithelial	Intergenic	-52508	plekha5	chr4-3197867-3198381@plekha5
0.125763	plekha5	chr4-3201843-3202808	3.22741	0.000624582	Superficial_Epithelial	Intergenic	-56484	plekha5	chr4-3201843-3202808@plekha5
0.0509784	plekha5	chr4-3217656-3218308	2.53574	0.00561052	Superficial_Epithelial	Intergenic	-69511	LOC100330316	chr4-3217656-3218308@plekha5
0.0826122	pik3cg	chr4-3347710-3348234	7.02348	1.08202e-12	Superficial_Epithelial	Exon	5361	pik3cg	chr4-3347710-3348234@pik3cg
0.0589187	si:dkey-61f9.1.1	chr4-3902605-3903040	6.05817	6.88406e-10	Superficial_Epithelial	Intergenic	-77207	gpr37b	chr4-3902605-3903040@si:dkey-61f9.1.1
0.0831414	gpr37b	chr4-3897589-3898592	6.89735	2.64909e-12	Superficial_Epithelial	Intergenic	-81655	gpr37b	chr4-3897589-3898592@gpr37b
0.0550821	cd9b	chr4-4231737-4233355	2.78339	0.00268967	Superficial_Epithelial	Promoter	0	smkr1	chr4-4231737-4233355@cd9b
0.0552269	cd9b	chr4-4250167-4250840	3.71393	0.000102033	Superficial_Epithelial	Promoter	0	cd9b	chr4-4250167-4250840@cd9b
0.0668429	cd9b	chr4-4261211-4262831	3.35566	0.000395875	Superficial_Epithelial	Promoter	0	cd9b	chr4-4261211-4262831@cd9b
0.0680223	ahcyl2b	chr4-5065319-5066154	3.95543	3.81987e-05	Superficial_Epithelial	Intron	11004	ahcyl2b	chr4-5065319-5066154@ahcyl2b
0.0722346	rad51ap1	chr4-5176754-5177026	7.6911	7.29387e-15	Superficial_Epithelial	Intergenic	-3624	fgf6b	chr4-5176754-5177026@rad51ap1
0.101277	slc5a8	chr4-5865045-5865655	11.8744	8.04074e-33	Superficial_Epithelial	Intergenic	-1139	slc5a8	chr4-5865045-5865655@slc5a8
0.084247	slc5a8	chr4-5866532-5866944	9.77387	7.28897e-23	Superficial_Epithelial	Intergenic	-1090	utp20	chr4-5866532-5866944@slc5a8
0.0562333	MDFIC	chr4-6340995-6341974	4.38049	5.92076e-06	Superficial_Epithelial	3' UTR	31761	si:ch211-262n1.4	chr4-6340995-6341974@MDFIC
0.0634588	MDFIC	chr4-6365266-6366295	6.04135	7.64156e-10	Superficial_Epithelial	Intron	7440	si:ch211-262n1.4	chr4-6365266-6366295@MDFIC
0.0770114	MDFIC	chr4-6367103-6367499	7.00044	1.27577e-12	Superficial_Epithelial	Intron	6236	si:ch211-262n1.4	chr4-6367103-6367499@MDFIC
0.0530759	dock4b	chr4-6840287-6840699	4.05492	2.50762e-05	Superficial_Epithelial	Promoter	64	dock4b	chr4-6840287-6840699@dock4b
0.0548291	tnnt2e	chr4-7427992-7428327	5.65992	7.57213e-09	Superficial_Epithelial	Intron	12655	cald1a	chr4-7427992-7428327@tnnt2e
0.0561087	tnnt2e	chr4-7491714-7492259	5.84634	2.51248e-09	Superficial_Epithelial	Exon	-16057	tnnt2e	chr4-7491714-7492259@tnnt2e
0.0514899	elk3	chr4-7707775-7708935	3.19525	0.000698553	Superficial_Epithelial	Exon	8913	elk3	chr4-7707775-7708935@elk3
0.0732517	si:ch211-240l19.7	chr4-8039595-8040609	8.42805	1.75731e-17	Superficial_Epithelial	Promoter	0	si:ch211-240l19.6	chr4-8039595-8040609@si:ch211-240l19.7
0.0541879	wnk1b	chr4-8080617-8081835	2.34496	0.00951465	Superficial_Epithelial	Intron	11918	wnk1b	chr4-8080617-8081835@wnk1b
0.0691172	wnk1b	chr4-8109100-8110346	3.30895	0.000468225	Superficial_Epithelial	Intron	-15347	wnk1b	chr4-8109100-8110346@wnk1b
0.0592939	ninj2	chr4-8112124-8112442	5.63012	9.00413e-09	Superficial_Epithelial	Intron	-18371	wnk1b	chr4-8112124-8112442@ninj2
0.0702394	ERC1	chr4-8124482-8125468	1.67946	0.0465313	Superficial_Epithelial	Intron	-9126	NA	chr4-8124482-8125468@ERC1
0.0673214	wnk1b	chr4-8138709-8139854	2.99521	0.00137127	Superficial_Epithelial	Intron	1612	NA	chr4-8138709-8139854@wnk1b
0.0546513	wnk1b	chr4-8199059-8200384	2.20294	0.0137994	Superficial_Epithelial	Intron	-12679	erc1b	chr4-8199059-8200384@wnk1b
0.0522602	wnk1b	chr4-8243432-8243874	2.97275	0.00147572	Superficial_Epithelial	Intron	30276	erc1b	chr4-8243432-8243874@wnk1b
0.0645992	ERC1	chr4-8217699-8218090	2.19154	0.0142064	Superficial_Epithelial	Intron	4543	erc1b	chr4-8217699-8218090@ERC1
0.0795562	ERC1	chr4-8243432-8243874	2.74027	0.0030694	Superficial_Epithelial	Intron	30276	erc1b	chr4-8243432-8243874@ERC1
0.0888421	ERC1	chr4-8249966-8250892	2.25395	0.0120998	Superficial_Epithelial	Intron	36810	erc1b	chr4-8249966-8250892@ERC1
0.0536095	ERC1	chr4-8312296-8313086	2.86876	0.00206045	Superficial_Epithelial	Intron	-63276	NA	chr4-8312296-8313086@ERC1
0.0890672	wnt5b	chr4-8438370-8439358	2.72555	0.00320976	Superficial_Epithelial	Intron	62008	NA	chr4-8438370-8439358@wnt5b
0.0520756	wnt5b	chr4-8458174-8458766	2.0292	0.021219	Superficial_Epithelial	Intron	-44921	NA	chr4-8458174-8458766@wnt5b
0.0757274	wnt5b	chr4-8470558-8471659	1.98205	0.0237366	Superficial_Epithelial	Intron	-32028	NA	chr4-8470558-8471659@wnt5b
0.0603416	wnt5b	chr4-8500290-8500971	2.03541	0.0209048	Superficial_Epithelial	Intron	-2716	NA	chr4-8500290-8500971@wnt5b
0.12382	wnt5b	chr4-8507491-8508742	4.16132	1.58206e-05	Superficial_Epithelial	Intron	3804	NA	chr4-8507491-8508742@wnt5b
0.085044	wnt5b	chr4-8515991-8517945	2.50765	0.00607677	Superficial_Epithelial	Intergenic	12304	NA	chr4-8515991-8517945@wnt5b
0.0713606	wnt5b	chr4-8523935-8524906	2.30677	0.0105338	Superficial_Epithelial	Intergenic	-7674	wnt5b	chr4-8523935-8524906@wnt5b
0.0898141	wnt5b	chr4-8531896-8533334	2.50434	0.00613408	Superficial_Epithelial	Promoter	0	wnt5b	chr4-8531896-8533334@wnt5b
0.0924959	wnt5b	chr4-8536828-8537801	2.89621	0.00188851	Superficial_Epithelial	Intron	4248	wnt5b	chr4-8536828-8537801@wnt5b
0.0711359	wnt5b	chr4-8539511-8540173	1.98252	0.0237106	Superficial_Epithelial	Intron	6931	wnt5b	chr4-8539511-8540173@wnt5b
0.0938118	wnt5b	chr4-8604821-8605619	2.76522	0.00284421	Superficial_Epithelial	Intron	6222	fbxl14b	chr4-8604821-8605619@wnt5b
0.0831348	wnt5b	chr4-8616139-8617212	2.36731	0.00895896	Superficial_Epithelial	Intron	-4298	fbxl14b	chr4-8616139-8617212@wnt5b
0.0628896	wnt5b	chr4-8618786-8619431	1.79888	0.0360187	Superficial_Epithelial	Intron	-6945	fbxl14b	chr4-8618786-8619431@wnt5b
0.0789718	wnt5b	chr4-8630629-8631400	2.75503	0.00293436	Superficial_Epithelial	Intron	-7222	wnt5b	chr4-8630629-8631400@wnt5b
0.0757612	wnt5b	chr4-8632476-8633030	2.71091	0.00335497	Superficial_Epithelial	Intron	-5592	wnt5b	chr4-8632476-8633030@wnt5b
0.0520386	adipor2	chr4-8668311-8669009	4.36826	6.26211e-06	Superficial_Epithelial	Intergenic	-1653	adipor2	chr4-8668311-8669009@adipor2
0.0666026	adipor2	chr4-8708198-8709661	5.52919	1.60854e-08	Superficial_Epithelial	3' UTR	25930	NA	chr4-8708198-8709661@adipor2
0.0932006	pnpla3	chr4-8866434-8866743	11.9823	2.1994e-33	Superficial_Epithelial	Intron	15829	mpped1	chr4-8866434-8866743@pnpla3
0.0541945	si:dkey-48p11.3	chr4-9128147-9128372	5.95872	1.27108e-09	Superficial_Epithelial	Intron	45180	chst11	chr4-9128147-9128372@si:dkey-48p11.3
0.0618376	chst11	chr4-9116668-9117623	2.01084	0.0221714	Superficial_Epithelial	Intron	55929	chst11	chr4-9116668-9117623@chst11
0.0878922	chst11	chr4-9147315-9148669	2.88455	0.00195986	Superficial_Epithelial	Intron	24883	chst11	chr4-9147315-9148669@chst11
0.091427	chst11	chr4-9171143-9171838	3.98912	3.31596e-05	Superficial_Epithelial	Intron	1714	chst11	chr4-9171143-9171838@chst11
0.0939295	chst11	chr4-9172802-9173680	3.95806	3.77806e-05	Superficial_Epithelial	Promoter	0	chst11	chr4-9172802-9173680@chst11
0.0680393	srgap1b	chr4-9279557-9280381	5.8333	2.71705e-09	Superficial_Epithelial	Promoter	0	srgap1b	chr4-9279557-9280381@srgap1b
0.0516909	C4H12orf66	chr4-9448527-9448832	4.34388	6.99934e-06	Superficial_Epithelial	Exon	-1583	tmtc1	chr4-9448527-9448832@C4H12orf66
0.0800495	hsp90b1	chr4-9745359-9746292	2.60673	0.00457054	Superficial_Epithelial	Intron	-16629	mical3b	chr4-9745359-9746292@hsp90b1
0.0601118	hsp90b1	chr4-9844975-9846127	2.1551	0.0155769	Superficial_Epithelial	Exon	6191	glt8d2	chr4-9844975-9846127@hsp90b1
0.058461	hsp90b1	chr4-9846424-9847104	1.99984	0.0227588	Superficial_Epithelial	Exon	5214	glt8d2	chr4-9846424-9847104@hsp90b1
0.0599945	hsp90b1	chr4-9888553-9889207	1.67555	0.0469129	Superficial_Epithelial	Intron	2667	adm2a	chr4-9888553-9889207@hsp90b1
0.0502512	hsp90b1	chr4-9911320-9912309	1.69962	0.044601	Superficial_Epithelial	Promoter	0	sbf1	chr4-9911320-9912309@hsp90b1
0.0672702	glt8d2	chr4-9844975-9846127	6.1486	3.90847e-10	Superficial_Epithelial	Exon	6191	glt8d2	chr4-9844975-9846127@glt8d2
0.0579231	flncb	chr4-10097077-10097864	4.05556	2.50067e-05	Superficial_Epithelial	Intron	30237	flncb	chr4-10097077-10097864@flncb
0.0724601	kcnd2	chr4-10308020-10308475	4.42807	4.7541e-06	Superficial_Epithelial	Intergenic	-57382	kcnd2	chr4-10308020-10308475@kcnd2
0.0590268	kcnd2	chr4-10349861-10350211	2.98472	0.00141917	Superficial_Epithelial	Intergenic	-15646	kcnd2	chr4-10349861-10350211@kcnd2
0.141899	kcnd2	chr4-10399655-10399866	9.9546	1.20398e-23	Superficial_Epithelial	Intron	33123	kcnd2	chr4-10399655-10399866@kcnd2
0.0544164	tspan12	chr4-10518420-10518614	5.59525	1.10153e-08	Superficial_Epithelial	Intron	80448	tspan12	chr4-10518420-10518614@tspan12
0.0825792	tspan12	chr4-10641505-10642002	9.47585	1.32304e-21	Superficial_Epithelial	Exon	19675	NA	chr4-10641505-10642002@tspan12
0.0820191	sema3aa	chr4-11244414-11245456	5.42231	2.94171e-08	Superficial_Epithelial	Exon	2829	NA	chr4-11244414-11245456@sema3aa
0.0530101	sema3aa	chr4-11250429-11251348	3.4705	0.000259747	Superficial_Epithelial	Intergenic	-2144	NA	chr4-11250429-11251348@sema3aa
0.0666164	sema3aa	chr4-11285804-11287501	3.84936	5.92138e-05	Superficial_Epithelial	Promoter	0	NA	chr4-11285804-11287501@sema3aa
0.0605413	sema3aa	chr4-11300748-11301618	4.26301	1.00846e-05	Superficial_Epithelial	Intergenic	-9697	sema3aa	chr4-11300748-11301618@sema3aa
0.0557629	net1	chr4-11565164-11566284	4.1127	1.95528e-05	Superficial_Epithelial	Promoter	0	NA	chr4-11565164-11566284@net1
0.0841177	net1	chr4-11570690-11573565	7.48948	3.45726e-14	Superficial_Epithelial	Downstream (<1kb)	3688	net1	chr4-11570690-11573565@net1
0.0605579	net1	chr4-11584450-11585324	4.84902	6.2035e-07	Superficial_Epithelial	Intron	-3502	net1	chr4-11584450-11585324@net1
0.0612811	net1	chr4-11598205-11599432	4.64356	1.71228e-06	Superficial_Epithelial	Intron	3717	net1	chr4-11598205-11599432@net1
0.0564249	BX465862.4	chr4-11608129-11608964	5.68983	6.35835e-09	Superficial_Epithelial	Promoter	0	mir29b-2	chr4-11608129-11608964@BX465862.4
0.061453	BX465862.4	chr4-11629717-11631671	6.12439	4.55165e-10	Superficial_Epithelial	Exon	5565	NA	chr4-11629717-11631671@BX465862.4
0.0716541	BX465862.3	chr4-11855519-11855737	8.66754	2.20778e-18	Superficial_Epithelial	Intron	-44720	cyb5r3	chr4-11855519-11855737@BX465862.3
0.114376	btbd11a	chr4-11925803-11927229	2.03824	0.0207628	Superficial_Epithelial	Intron	-19646	NA	chr4-11925803-11927229@btbd11a
0.136801	btbd11a	chr4-11929016-11929675	3.8074	7.02171e-05	Superficial_Epithelial	Intron	-17200	NA	chr4-11929016-11929675@btbd11a
0.0522515	btbd11a	chr4-11980134-11980446	2.67717	0.0037123	Superficial_Epithelial	Intron	26958	btbd11a	chr4-11980134-11980446@btbd11a
0.114884	btbd11a	chr4-11984251-11985215	2.29717	0.0108045	Superficial_Epithelial	Intron	22189	btbd11a	chr4-11984251-11985215@btbd11a
0.117285	btbd11a	chr4-11990426-11991054	4.8284	6.88178e-07	Superficial_Epithelial	Intron	16350	btbd11a	chr4-11990426-11991054@btbd11a
0.182628	btbd11a	chr4-11991961-11993769	4.39901	5.43734e-06	Superficial_Epithelial	Intron	13635	btbd11a	chr4-11991961-11993769@btbd11a
0.0553747	btbd11a	chr4-11998590-11998876	3.03953	0.00118475	Superficial_Epithelial	Intron	8528	btbd11a	chr4-11998590-11998876@btbd11a
0.0987052	btbd11a	chr4-12005582-12008277	2.87342	0.00203029	Superficial_Epithelial	Promoter	0	btbd11a	chr4-12005582-12008277@btbd11a
0.0988946	btbd11a	chr4-12012240-12013877	2.26775	0.0116723	Superficial_Epithelial	Promoter	0	cry1a	chr4-12012240-12013877@btbd11a
0.0707444	btbd11a	chr4-12101251-12102387	1.66336	0.0481198	Superficial_Epithelial	Promoter	0	braf	chr4-12101251-12102387@btbd11a
0.0501064	si:dkey-222f8.3	chr4-12077987-12078786	3.13132	0.0008701	Superficial_Epithelial	Exon	23239	braf	chr4-12077987-12078786@si:dkey-222f8.3
0.0509785	irak3	chr4-12790078-12791217	3.75874	8.53859e-05	Superficial_Epithelial	Promoter	0	irak3	chr4-12790078-12791217@irak3
0.0550989	hmga2	chr4-12820471-12821553	3.08947	0.00100257	Superficial_Epithelial	Intron	-24982	b2m	chr4-12820471-12821553@hmga2
0.0968973	hmga2	chr4-12834492-12835682	7.04065	9.56751e-13	Superficial_Epithelial	Intron	26405	hmga2	chr4-12834492-12835682@hmga2
0.0501252	hmga2	chr4-12836099-12836807	2.79371	0.00260537	Superficial_Epithelial	Intron	25280	hmga2	chr4-12836099-12836807@hmga2
0.0538286	hmga2	chr4-12851974-12852770	3.51083	0.000223351	Superficial_Epithelial	Intron	9317	hmga2	chr4-12851974-12852770@hmga2
0.0671037	msrb3	chr4-12913238-12914476	4.26345	1.00647e-05	Superficial_Epithelial	Promoter	0	msrb3	chr4-12913238-12914476@msrb3
0.0510018	lemd3	chr4-12924448-12925137	3.29802	0.000486849	Superficial_Epithelial	Exon	4949	lemd3	chr4-12924448-12925137@lemd3
0.0509798	grip1	chr4-13185466-13186083	3.52242	0.000213815	Superficial_Epithelial	Intron	-28495	grip1	chr4-13185466-13186083@grip1
0.0561698	grip1	chr4-13254561-13256439	3.55828	0.000186647	Superficial_Epithelial	Promoter	0	grip1	chr4-13254561-13256439@grip1
0.0521129	calua	chr4-13469090-13470053	1.67491	0.0469759	Superficial_Epithelial	Intergenic	15726	dyrk2	chr4-13469090-13470053@calua
0.0663296	yaf2	chr4-13916846-13917655	5.64405	8.30471e-09	Superficial_Epithelial	Intron	3515	yaf2	chr4-13916846-13917655@yaf2
0.134118	prickle1b	chr4-13946788-13947419	4.76316	9.52945e-07	Superficial_Epithelial	Exon	-6118	pphln1	chr4-13946788-13947419@prickle1b
0.25444	prickle1b	chr4-13950232-13951364	8.98205	1.3289e-19	Superficial_Epithelial	Exon	-2173	pphln1	chr4-13950232-13951364@prickle1b
0.12275	prickle1b	chr4-13959913-13961114	3.48984	0.00024165	Superficial_Epithelial	Intron	6376	pphln1	chr4-13959913-13961114@prickle1b
0.0714452	prickle1b	chr4-13967893-13968618	3.5883	0.00016642	Superficial_Epithelial	Exon	4595	prickle1b	chr4-13967893-13968618@prickle1b
0.0810074	prickle1b	chr4-13970382-13970767	4.3453	6.9543e-06	Superficial_Epithelial	Intron	2446	prickle1b	chr4-13970382-13970767@prickle1b
0.0916378	prickle1b	chr4-13972846-13973694	2.68076	0.00367271	Superficial_Epithelial	Promoter	0	prickle1b	chr4-13972846-13973694@prickle1b
0.0594703	prickle1b	chr4-13973984-13974262	2.89106	0.0019197	Superficial_Epithelial	Promoter	-771	prickle1b	chr4-13973984-13974262@prickle1b
0.0755438	prickle1b	chr4-13979290-13980470	2.07482	0.0190014	Superficial_Epithelial	Intron	-6077	prickle1b	chr4-13979290-13980470@prickle1b
0.0686719	prickle1b	chr4-13994352-13996101	1.97223	0.0242917	Superficial_Epithelial	Promoter	0	prickle1b	chr4-13994352-13996101@prickle1b
0.083307	prickle1b	chr4-14037784-14038456	2.78638	0.00266498	Superficial_Epithelial	Intergenic	-42018	prickle1b	chr4-14037784-14038456@prickle1b
0.128708	prickle1b	chr4-14046523-14048372	3.12765	0.000881058	Superficial_Epithelial	Intergenic	-50757	prickle1b	chr4-14046523-14048372@prickle1b
0.0777585	prickle1b	chr4-14053863-14054306	2.99488	0.00137278	Superficial_Epithelial	Intergenic	-52205	NA	chr4-14053863-14054306@prickle1b
0.0507495	CU469420.4	chr4-14110650-14111026	11.1312	4.42302e-29	Superficial_Epithelial	Exon	1027	NA	chr4-14110650-14111026@CU469420.4
0.0523239	CU469420.4	chr4-14149148-14149406	8.48745	1.05614e-17	Superficial_Epithelial	Intergenic	12921	NA	chr4-14149148-14149406@CU469420.4
0.0777215	CR786571.3	chr4-14186269-14186656	7.99476	6.49154e-16	Superficial_Epithelial	Promoter	73	NA	chr4-14186269-14186656@CR786571.3
0.0603475	nuak1a	chr4-14294131-14294787	5.05177	2.18862e-07	Superficial_Epithelial	Exon	21068	nell2b	chr4-14294131-14294787@nuak1a
0.115676	nuak1a	chr4-14319155-14319594	8.85162	4.31279e-19	Superficial_Epithelial	Intron	-3300	nell2b	chr4-14319155-14319594@nuak1a
0.0684614	nuak1a	chr4-14401775-14403390	4.7105	1.23554e-06	Superficial_Epithelial	Intron	2303	LOC108183545	chr4-14401775-14403390@nuak1a
0.0523134	nuak1a	chr4-14403915-14404211	2.66048	0.00390146	Superficial_Epithelial	Intron	4443	LOC108183545	chr4-14403915-14404211@nuak1a
0.101645	nuak1a	chr4-14404992-14405442	6.43769	6.06522e-11	Superficial_Epithelial	Intron	5520	LOC108183545	chr4-14404992-14405442@nuak1a
0.0500823	plxnb2a	chr4-14539190-14539844	3.35559	0.000395986	Superficial_Epithelial	Intron	-7503	plxnb2a	chr4-14539190-14539844@plxnb2a
0.0505528	plxnb2a	chr4-14602125-14603774	2.43446	0.00745705	Superficial_Epithelial	Intron	20707	NA	chr4-14602125-14603774@plxnb2a
0.0501265	akr1b1.1	chr4-14839520-14839985	6.366	9.70133e-11	Superficial_Epithelial	Intron	13221	shisal1a	chr4-14839520-14839985@akr1b1.1
0.080871	smo	chr4-15044067-15044811	5.00638	2.77319e-07	Superficial_Epithelial	Intron	-29755	mir183	chr4-15044067-15044811@smo
0.0504803	ube2h	chr4-15003220-15004185	2.31039	0.0104333	Superficial_Epithelial	Promoter	0	klhdc10	chr4-15003220-15004185@ube2h
0.077561	ube2h	chr4-15036982-15037930	3.79384	7.41667e-05	Superficial_Epithelial	Intron	25641	ube2h	chr4-15036982-15037930@ube2h
0.0563439	ube2h	chr4-15044067-15044811	2.3887	0.0084541	Superficial_Epithelial	Intron	-29755	mir183	chr4-15044067-15044811@ube2h
0.0678663	ube2h	chr4-15048998-15050064	3.18998	0.000711411	Superficial_Epithelial	Intron	-24502	mir183	chr4-15048998-15050064@ube2h
0.100602	plxna4	chr4-15323117-15324354	2.15062	0.015753	Superficial_Epithelial	Intron	96098	plxna4	chr4-15323117-15324354@plxna4
0.0863247	plxna4	chr4-15325675-15326465	2.376	0.00875068	Superficial_Epithelial	Intron	93987	plxna4	chr4-15325675-15326465@plxna4
0.129565	plxna4	chr4-15327973-15328987	3.35478	0.000397145	Superficial_Epithelial	Intron	91465	plxna4	chr4-15327973-15328987@plxna4
0.0774135	plxna4	chr4-15330607-15330947	3.3848	0.00035615	Superficial_Epithelial	Intron	89505	plxna4	chr4-15330607-15330947@plxna4
0.139368	plxna4	chr4-15343272-15344871	3.67203	0.000120315	Superficial_Epithelial	Intron	75581	plxna4	chr4-15343272-15344871@plxna4
0.124313	plxna4	chr4-15346616-15347800	3.26656	0.00054431	Superficial_Epithelial	Intron	72652	plxna4	chr4-15346616-15347800@plxna4
0.0512224	plxna4	chr4-15368716-15369298	2.31363	0.0103439	Superficial_Epithelial	Intron	51154	plxna4	chr4-15368716-15369298@plxna4
0.0842531	plxna4	chr4-15370492-15371872	2.12132	0.0169475	Superficial_Epithelial	Intron	48580	plxna4	chr4-15370492-15371872@plxna4
0.0617838	plxna4	chr4-15382390-15382987	3.00245	0.00133908	Superficial_Epithelial	Intron	37465	plxna4	chr4-15382390-15382987@plxna4
0.0616182	plxna4	chr4-15387523-15388149	2.92076	0.00174591	Superficial_Epithelial	Intron	32303	plxna4	chr4-15387523-15388149@plxna4
0.0787521	plxna4	chr4-15402076-15403144	2.04902	0.0202299	Superficial_Epithelial	Intron	17308	plxna4	chr4-15402076-15403144@plxna4
0.0548877	plxna4	chr4-15408072-15409060	2.46046	0.00693801	Superficial_Epithelial	Intron	11392	plxna4	chr4-15408072-15409060@plxna4
0.0891027	plxna4	chr4-15430368-15431701	2.29264	0.0109344	Superficial_Epithelial	Intergenic	-9916	plxna4	chr4-15430368-15431701@plxna4
0.114878	plxna4	chr4-15440150-15442410	4.00726	3.07131e-05	Superficial_Epithelial	Intergenic	-19698	plxna4	chr4-15440150-15442410@plxna4
0.0682659	lrguk	chr4-15722046-15722722	7.05306	8.75122e-13	Superficial_Epithelial	Intron	36951	si:ch211-92l17.1	chr4-15722046-15722722@lrguk
0.0557845	col7a1l	chr4-15830109-15831030	2.77508	0.00275943	Superficial_Epithelial	Exon	10381	lrguk	chr4-15830109-15831030@col7a1l
0.0857993	col7a1l	chr4-15835599-15836498	4.99357	2.96368e-07	Superficial_Epithelial	Exon	15871	lrguk	chr4-15835599-15836498@col7a1l
0.0980292	col7a1l	chr4-15842724-15843733	4.84379	6.36912e-07	Superficial_Epithelial	Intergenic	22996	lrguk	chr4-15842724-15843733@col7a1l
0.0533964	si:dkey-117n7.2	chr4-15842724-15843733	3.12437	0.000890921	Superficial_Epithelial	Intergenic	22996	lrguk	chr4-15842724-15843733@si:dkey-117n7.2
0.149256	col7a1l	chr4-15862327-15863552	7.14992	4.34134e-13	Superficial_Epithelial	Intergenic	-25885	col7a1l	chr4-15862327-15863552@col7a1l
0.0503018	col7a1l	chr4-15883571-15884064	2.72091	0.0032551	Superficial_Epithelial	Intergenic	-5373	col7a1l	chr4-15883571-15884064@col7a1l
0.057212	si:dkey-117n7.5	chr4-15906077-15906805	2.41917	0.00777807	Superficial_Epithelial	Exon	6409	col7a1l	chr4-15906077-15906805@si:dkey-117n7.5
0.0502083	si:dkey-117n7.2	chr4-15991346-15991728	3.97356	3.54028e-05	Superficial_Epithelial	Exon	2959	copg2	chr4-15991346-15991728@si:dkey-117n7.2
0.0544921	si:dkey-117n7.5	chr4-15989669-15990329	2.52327	0.00581342	Superficial_Epithelial	Exon	1282	copg2	chr4-15989669-15990329@si:dkey-117n7.5
0.074729	atp2b1a	chr4-16122848-16125210	3.29227	0.000496903	Superficial_Epithelial	Promoter	0	atp2b1a	chr4-16122848-16125210@atp2b1a
0.0685383	atp2b1a	chr4-16187358-16188007	2.50984	0.0060393	Superficial_Epithelial	Intergenic	25533	NA	chr4-16187358-16188007@atp2b1a
0.0700333	atp2b1a	chr4-16205126-16206279	2.43782	0.00738816	Superficial_Epithelial	Intergenic	7261	NA	chr4-16205126-16206279@atp2b1a
0.115983	atp2b1a	chr4-16208519-16209379	4.6228	1.89296e-06	Superficial_Epithelial	Intergenic	4161	NA	chr4-16208519-16209379@atp2b1a
0.0752975	atp2b1a	chr4-16220175-16221155	2.46097	0.00692808	Superficial_Epithelial	Intergenic	-6635	NA	chr4-16220175-16221155@atp2b1a
0.0520275	lum	chr4-16258674-16259743	2.81454	0.00244237	Superficial_Epithelial	Intergenic	-45134	NA	chr4-16258674-16259743@lum
0.0565296	lum	chr4-16439844-16440662	3.90259	4.75851e-05	Superficial_Epithelial	Intergenic	10713	LOC101882092	chr4-16439844-16440662@lum
0.0561607	dcn	chr4-16356953-16357678	2.5149	0.00595333	Superficial_Epithelial	Intergenic	-2661	lum	chr4-16356953-16357678@dcn
0.0521276	dcn	chr4-16361575-16362148	2.02243	0.021566	Superficial_Epithelial	Intergenic	-7283	lum	chr4-16361575-16362148@dcn
0.0521061	wu:fc23c09	chr4-16377470-16377744	5.07812	1.90591e-07	Superficial_Epithelial	Intron	-23178	lum	chr4-16377470-16377744@wu:fc23c09
0.113529	dcn	chr4-16405428-16407443	4.75814	9.76917e-07	Superficial_Epithelial	Promoter	0	dcn	chr4-16405428-16407443@dcn
0.109401	dcn	chr4-16436032-16437033	5.04888	2.22203e-07	Superficial_Epithelial	Intergenic	14342	LOC101882092	chr4-16436032-16437033@dcn
0.0628974	dcn	chr4-16439844-16440662	2.5534	0.00533392	Superficial_Epithelial	Intergenic	10713	LOC101882092	chr4-16439844-16440662@dcn
0.0671238	btg1	chr4-16532322-16534892	4.4015	5.37524e-06	Superficial_Epithelial	Downstream (1-2kb)	10193	btg1	chr4-16532322-16534892@btg1
0.091477	dennd5b	chr4-16684373-16684882	4.32772	7.53316e-06	Superficial_Epithelial	Intron	21894	dennd5b	chr4-16684373-16684882@dennd5b
0.0694326	dennd5b	chr4-16686263-16687899	2.49063	0.00637586	Superficial_Epithelial	Intron	18877	dennd5b	chr4-16686263-16687899@dennd5b
0.0529548	dennd5b	chr4-16804278-16805057	2.62903	0.0042814	Superficial_Epithelial	Exon	8590	spx	chr4-16804278-16805057@dennd5b
0.0546454	etnk1	chr4-16864353-16865241	3.63313	0.000140002	Superficial_Epithelial	Exon	-10879	slc25a3a	chr4-16864353-16865241@etnk1
0.0519171	etnk1	chr4-16873862-16874733	3.36194	0.000386989	Superficial_Epithelial	Intron	1548	tmpoa	chr4-16873862-16874733@etnk1
0.0752222	etnk1	chr4-16907383-16908306	5.11357	1.58067e-07	Superficial_Epithelial	Intergenic	8742	etnk1	chr4-16907383-16908306@etnk1
0.0574179	etnk1	chr4-16911175-16911658	4.60196	2.09267e-06	Superficial_Epithelial	Intergenic	12534	etnk1	chr4-16911175-16911658@etnk1
0.0822138	parpbp	chr4-17404517-17405160	6.53275	3.22858e-11	Superficial_Epithelial	Intron	4373	pah	chr4-17404517-17405160@parpbp
0.0517347	cwf19l1	chr4-17542755-17543262	4.20859	1.28485e-05	Superficial_Epithelial	Intron	3621	itfg2	chr4-17542755-17543262@cwf19l1
0.072559	anks1b	chr4-18165000-18166036	2.38679	0.00849802	Superficial_Epithelial	Intron	23484	NA	chr4-18165000-18166036@anks1b
0.0507157	cradd	chr4-18394860-18395495	4.11924	1.90061e-05	Superficial_Epithelial	Intron	21071	cradd	chr4-18394860-18395495@cradd
0.0500202	atxn10	chr4-18736914-18737300	4.92432	4.23262e-07	Superficial_Epithelial	Intron	4642	atxn10	chr4-18736914-18737300@atxn10
0.0654755	si:dkey-31f5.8	chr4-18951502-18952527	4.11226	1.95906e-05	Superficial_Epithelial	3' UTR	1474	si:dkey-31f5.8	chr4-18951502-18952527@si:dkey-31f5.8
0.0564141	si:dkey-31f5.8	chr4-18953336-18954723	2.82174	0.00238823	Superficial_Epithelial	Promoter	0	si:dkey-31f5.8	chr4-18953336-18954723@si:dkey-31f5.8
0.0619435	impdh1b	chr4-18990198-18991551	2.65686	0.00394359	Superficial_Epithelial	Intron	24845	si:dkey-31f5.11	chr4-18990198-18991551@impdh1b
0.0504288	impdh1b	chr4-19034266-19034813	1.8285	0.0337372	Superficial_Epithelial	Promoter	-461	lepb	chr4-19034266-19034813@impdh1b
0.113823	lrrc17	chr4-20146064-20147751	2.72241	0.00324035	Superficial_Epithelial	Exon	8334	lrrc17	chr4-20146064-20147751@lrrc17
0.0802306	lrrc17	chr4-20154252-20156444	1.70762	0.0438534	Superficial_Epithelial	Promoter	0	lrrc17	chr4-20154252-20156444@lrrc17
0.075996	lrrc17	chr4-20165667-20166486	1.84611	0.0324384	Superficial_Epithelial	Intergenic	-9582	lrrc17	chr4-20165667-20166486@lrrc17
0.087368	lrrc17	chr4-20172316-20174573	2.75813	0.00290663	Superficial_Epithelial	Downstream (1-2kb)	-2953	ccdc146	chr4-20172316-20174573@lrrc17
0.0614061	ccdc146	chr4-20168327-20168525	4.66961	1.50889e-06	Superficial_Epithelial	Intergenic	-9001	ccdc146	chr4-20168327-20168525@ccdc146
0.0808997	ccdc146	chr4-20190705-20191077	6.71543	9.37548e-12	Superficial_Epithelial	Exon	-8741	fgl2a	chr4-20190705-20191077@ccdc146
0.0510038	ccdc146	chr4-20207941-20209019	4.19635	1.35625e-05	Superficial_Epithelial	Promoter	0	gsap	chr4-20207941-20209019@ccdc146
0.053906	stk38l	chr4-20198415-20198696	5.98841	1.05954e-09	Superficial_Epithelial	3' UTR	9470	gsap	chr4-20198415-20198696@stk38l
0.0664738	cacna1c	chr4-20322147-20322645	4.28095	9.30501e-06	Superficial_Epithelial	Intron	4020	cacna1c	chr4-20322147-20322645@cacna1c
0.0510003	cacna1c	chr4-20328844-20329999	3.87099	5.41961e-05	Superficial_Epithelial	Intron	10717	cacna1c	chr4-20328844-20329999@cacna1c
0.0652733	cacna1c	chr4-20343802-20344917	4.56763	2.46638e-06	Superficial_Epithelial	Intron	25675	cacna1c	chr4-20343802-20344917@cacna1c
0.0528336	cacna1c	chr4-20400315-20400525	3.76334	8.3828e-05	Superficial_Epithelial	Intron	-4145	NA	chr4-20400315-20400525@cacna1c
0.0592532	nav3	chr4-20739646-20740290	1.92218	0.0272913	Superficial_Epithelial	Intergenic	-72610	nav3	chr4-20739646-20740290@nav3
0.0740966	nav3	chr4-20751853-20752152	1.86688	0.0309591	Superficial_Epithelial	Intergenic	-60748	nav3	chr4-20751853-20752152@nav3
0.125106	nav3	chr4-20755467-20756338	3.46697	0.000263176	Superficial_Epithelial	Intergenic	-56562	nav3	chr4-20755467-20756338@nav3
0.0565478	nav3	chr4-20758911-20759319	1.82935	0.0336734	Superficial_Epithelial	Intergenic	-53581	nav3	chr4-20758911-20759319@nav3
0.0808837	nav3	chr4-20761165-20761836	2.11222	0.0173338	Superficial_Epithelial	Intergenic	-51064	nav3	chr4-20761165-20761836@nav3
0.0723015	nav3	chr4-20763688-20764949	1.65133	0.0493356	Superficial_Epithelial	Intergenic	-47951	nav3	chr4-20763688-20764949@nav3
0.076106	nav3	chr4-20768305-20768868	3.25939	0.000558254	Superficial_Epithelial	Intergenic	-44032	nav3	chr4-20768305-20768868@nav3
0.0923881	nav3	chr4-20771590-20772510	2.38605	0.00851528	Superficial_Epithelial	Intergenic	-40390	nav3	chr4-20771590-20772510@nav3
0.0526656	nav3	chr4-20774200-20774737	1.73194	0.0416425	Superficial_Epithelial	Intergenic	-38163	nav3	chr4-20774200-20774737@nav3
0.0600398	nav3	chr4-20781177-20781892	1.92654	0.0270185	Superficial_Epithelial	Intergenic	-31008	nav3	chr4-20781177-20781892@nav3
0.0878221	nav3	chr4-20811387-20813140	2.86348	0.0020951	Superficial_Epithelial	Promoter	0	nav3	chr4-20811387-20813140@nav3
0.077131	nav3	chr4-20823126-20824238	1.70872	0.0437518	Superficial_Epithelial	Intron	10226	nav3	chr4-20823126-20824238@nav3
0.116076	nav3	chr4-20845019-20845925	2.9547	0.00156488	Superficial_Epithelial	Intron	32119	nav3	chr4-20845019-20845925@nav3
0.111012	nav3	chr4-20847128-20848859	3.09608	0.000980477	Superficial_Epithelial	Intron	34228	nav3	chr4-20847128-20848859@nav3
0.0507948	nav3	chr4-20854965-20855495	1.73742	0.0411567	Superficial_Epithelial	Intron	-31835	nav3	chr4-20854965-20855495@nav3
0.0701177	nav3	chr4-20859913-20860471	1.83426	0.0333079	Superficial_Epithelial	Intron	-26859	nav3	chr4-20859913-20860471@nav3
0.109914	nav3	chr4-20896615-20897725	2.73018	0.00316501	Superficial_Epithelial	Intron	9285	nav3	chr4-20896615-20897725@nav3
0.0607198	pawr	chr4-21504056-21505245	3.37318	0.000371521	Superficial_Epithelial	Intron	-37231	pawr	chr4-21504056-21505245@pawr
0.0653367	ppp1r12a	chr4-21538800-21539988	3.31472	0.000458677	Superficial_Epithelial	Exon	44170	ppp1r12a	chr4-21538800-21539988@ppp1r12a
0.103409	ppp1r12a	chr4-21595018-21595873	7.39621	7.00621e-14	Superficial_Epithelial	Intergenic	-10860	ppp1r12a	chr4-21595018-21595873@ppp1r12a
0.0588633	ppp1r12a	chr4-21613337-21614281	3.79175	7.47947e-05	Superficial_Epithelial	Intergenic	28774	NA	chr4-21613337-21614281@ppp1r12a
0.0508045	ppp1r12a	chr4-21646974-21648375	2.41016	0.00797287	Superficial_Epithelial	Promoter	0	NA	chr4-21646974-21648375@ppp1r12a
0.0570852	ppp1r12a	chr4-21651854-21653885	3.78654	7.63793e-05	Superficial_Epithelial	Promoter	0	rps16	chr4-21651854-21653885@ppp1r12a
0.0512655	lin7a	chr4-21796125-21796509	4.42879	4.73822e-06	Superficial_Epithelial	Intron	-45344	NA	chr4-21796125-21796509@lin7a
0.0649473	gnai1	chr4-22649635-22650607	2.18405	0.0144794	Superficial_Epithelial	Exon	20862	cd36	chr4-22649635-22650607@gnai1
0.0963091	gnai1	chr4-22680033-22681915	3.99289	3.26365e-05	Superficial_Epithelial	Promoter	0	gnai1	chr4-22680033-22681915@gnai1
0.0527202	gnai1	chr4-22686876-22687661	1.85336	0.0319157	Superficial_Epithelial	Intron	6434	gnai1	chr4-22686876-22687661@gnai1
0.0602009	gnai1	chr4-22688817-22689581	2.06968	0.0192411	Superficial_Epithelial	Intron	8375	gnai1	chr4-22688817-22689581@gnai1
0.0756832	gnai1	chr4-22690424-22690981	2.60697	0.00456731	Superficial_Epithelial	Intron	9982	gnai1	chr4-22690424-22690981@gnai1
0.0530989	gnai1	chr4-22693063-22693838	2.04308	0.0205224	Superficial_Epithelial	Intron	12621	gnai1	chr4-22693063-22693838@gnai1
0.0574708	gnai1	chr4-22720683-22721069	3.47014	0.000260098	Superficial_Epithelial	Intergenic	28484	nup107	chr4-22720683-22721069@gnai1
0.0533525	mdm2	chr4-23124630-23124948	3.94989	3.90928e-05	Superficial_Epithelial	Promoter	-741	mdm2	chr4-23124630-23124948@mdm2
0.0693965	trhde.2	chr4-23171279-23171560	9.59144	4.343e-22	Superficial_Epithelial	Intergenic	36913	mdm2	chr4-23171279-23171560@trhde.2
0.070723	cpm	chr4-23747326-23748502	3.69336	0.000110657	Superficial_Epithelial	Exon	5769	cpm	chr4-23747326-23748502@cpm
0.0631704	celf2	chr4-23940983-23941968	3.91637	4.49456e-05	Superficial_Epithelial	Intron	21870	celf2	chr4-23940983-23941968@celf2
0.0634083	celf2	chr4-23947581-23947823	3.65675	0.000127717	Superficial_Epithelial	Exon	16015	celf2	chr4-23947581-23947823@celf2
0.0540479	celf2	chr4-23991558-23992344	2.68717	0.003603	Superficial_Epithelial	Intron	27367	celf2	chr4-23991558-23992344@celf2
0.0587937	celf2	chr4-24006916-24007908	3.75765	8.57597e-05	Superficial_Epithelial	Intron	11803	celf2	chr4-24006916-24007908@celf2
0.0532584	celf2	chr4-24008797-24009191	2.95318	0.00157259	Superficial_Epithelial	Intron	10520	celf2	chr4-24008797-24009191@celf2
0.0547	celf2	chr4-24029421-24029999	3.16507	0.000775232	Superficial_Epithelial	Intron	1757	celf2	chr4-24029421-24029999@celf2
0.0579274	celf2	chr4-24030532-24032251	2.94727	0.00160295	Superficial_Epithelial	Promoter	0	celf2	chr4-24030532-24032251@celf2
0.0683567	celf2	chr4-24047092-24048245	3.45092	0.000279338	Superficial_Epithelial	Intergenic	-15168	celf2	chr4-24047092-24048245@celf2
0.0838988	celf2	chr4-24051407-24051852	5.44498	2.59061e-08	Superficial_Epithelial	Intergenic	-19483	celf2	chr4-24051407-24051852@celf2
0.0509994	celf2	chr4-24071576-24072309	3.08753	0.00100913	Superficial_Epithelial	Intergenic	-39652	celf2	chr4-24071576-24072309@celf2
0.0809308	celf2	chr4-24078923-24079911	4.04521	2.61385e-05	Superficial_Epithelial	Intergenic	-46999	celf2	chr4-24078923-24079911@celf2
0.0506201	celf2	chr4-24100136-24101092	2.60803	0.00455324	Superficial_Epithelial	Intergenic	-68212	celf2	chr4-24100136-24101092@celf2
0.0555479	celf2	chr4-24101585-24101904	3.76905	8.19349e-05	Superficial_Epithelial	Intergenic	-69661	celf2	chr4-24101585-24101904@celf2
0.0527168	prkcq	chr4-25459156-25459865	8.29665	5.35441e-17	Superficial_Epithelial	Intergenic	18261	pfkfb3	chr4-25459156-25459865@prkcq
0.0695824	pfkfb3	chr4-25472010-25472695	8.7438	1.12698e-18	Superficial_Epithelial	3' UTR	5431	pfkfb3	chr4-25472010-25472695@pfkfb3
0.0538849	tnni1d	chr4-26274903-26275171	7.2296	2.4221e-13	Superficial_Epithelial	Intergenic	47663	st8sia1	chr4-26274903-26275171@tnni1d
0.0520139	cerk	chr4-27906287-27906983	3.59635	0.00016136	Superficial_Epithelial	Intron	7454	cerk	chr4-27906287-27906983@cerk
0.0887524	gramd4a	chr4-28144704-28145231	8.46806	1.2476e-17	Superficial_Epithelial	Intron	13104	gramd4a	chr4-28144704-28145231@gramd4a
0.0505728	si:ch73-263o4.4	chr4-28432433-28432893	4.58379	2.28314e-06	Superficial_Epithelial	Promoter	0	NA	chr4-28432433-28432893@si:ch73-263o4.4
0.0638301	CR847895.1	chr4-29331208-29332793	6.96206	1.67666e-12	Superficial_Epithelial	Intergenic	-12164	NA	chr4-29331208-29332793@CR847895.1
0.0602344	znf1111	chr4-29826515-29827068	13.4654	1.24996e-41	Superficial_Epithelial	Downstream (1-2kb)	-5376	NA	chr4-29826515-29827068@znf1111
0.0720946	si:ch211-209n20.1	chr4-38550340-38551443	5.19709	1.01217e-07	Superficial_Epithelial	Promoter	0	si:ch211-209n20.1	chr4-38550340-38551443@si:ch211-209n20.1
0.0505567	znf977.1	chr4-38998622-38999948	5.94793	1.3578e-09	Superficial_Epithelial	Intergenic	7961	si:dkey-122c11.1	chr4-38998622-38999948@znf977.1
0.059942	si:ch211-197e7.1	chr4-49761244-49762139	4.95704	3.57871e-07	Superficial_Epithelial	Downstream (2-3kb)	12504	NA	chr4-49761244-49762139@si:ch211-197e7.1
0.0519753	si:ch211-197e7.1	chr4-49773562-49774558	5.00412	2.80596e-07	Superficial_Epithelial	Intron	24822	NA	chr4-49773562-49774558@si:ch211-197e7.1
0.0759574	si:ch211-197e7.1	chr4-49801064-49803310	5.53086	1.59336e-08	Superficial_Epithelial	Promoter	0	si:ch211-197e7.1	chr4-49801064-49803310@si:ch211-197e7.1
0.0657215	znf1058	chr4-50669506-50669792	5.90536	1.75934e-09	Superficial_Epithelial	Intergenic	46800	NA	chr4-50669506-50669792@znf1058
0.0655125	si:ch211-208f21.2	chr4-50920864-50921388	7.70807	6.38674e-15	Superficial_Epithelial	Exon	5379	NA	chr4-50920864-50921388@si:ch211-208f21.2
0.106402	si:dkeyp-82b4.3	chr4-51371386-51371604	8.55498	5.89461e-18	Superficial_Epithelial	Intergenic	23482	NA	chr4-51371386-51371604@si:dkeyp-82b4.3
0.0590722	si:dkey-165e24.1	chr4-51546627-51548774	3.85828	5.70949e-05	Superficial_Epithelial	Intron	-2544	si:dkey-165e24.1	chr4-51546627-51548774@si:dkey-165e24.1
0.0587609	si:dkey-165e24.1	chr4-51599045-51600736	3.97398	3.53407e-05	Superficial_Epithelial	Intergenic	34048	si:dkey-165e24.1	chr4-51599045-51600736@si:dkey-165e24.1
0.0610637	si:dkey-165e24.1	chr4-51601976-51603396	3.76733	8.25006e-05	Superficial_Epithelial	Intergenic	36979	si:dkey-165e24.1	chr4-51601976-51603396@si:dkey-165e24.1
0.0575161	CR388148.2	chr4-58666938-58669542	4.70755	1.25355e-06	Superficial_Epithelial	Promoter	0	NA	chr4-58666938-58669542@CR388148.2
0.0524841	si:dkey-105i14.1	chr4-59251306-59253518	5.48779	2.03492e-08	Superficial_Epithelial	Intron	5212	NA	chr4-59251306-59253518@si:dkey-105i14.1
0.0583533	si:ch73-158p21.3	chr4-76359462-76360660	6.20732	2.69478e-10	Superficial_Epithelial	3' UTR	6044	si:ch73-158p21.2	chr4-76359462-76360660@si:ch73-158p21.3
0.054969	si:ch73-158p21.3	chr4-76362035-76362863	5.71824	5.38156e-09	Superficial_Epithelial	Downstream (<1kb)	7767	si:ch73-158p21.3	chr4-76362035-76362863@si:ch73-158p21.3
0.054709	ms4a17a.9	chr4-76675725-76676386	4.90256	4.72989e-07	Superficial_Epithelial	Intron	4713	ms4a17a.2	chr4-76675725-76676386@ms4a17a.9
0.0702713	ms4a17a.5.1	chr4-76742761-76744019	2.98451	0.00142017	Superficial_Epithelial	Promoter	-996	ms4a17a.10	chr4-76742761-76744019@ms4a17a.5.1
0.0541296	ms4a17a.6	chr4-76662837-76663572	4.48515	3.6432e-06	Superficial_Epithelial	Intron	3824	ms4a17a.5	chr4-76662837-76663572@ms4a17a.6
0.0572919	ms4a17a.10	chr4-76662837-76663572	6.547	2.93513e-11	Superficial_Epithelial	Intron	3824	ms4a17a.5	chr4-76662837-76663572@ms4a17a.10
0.0765616	ms4a17a.2	chr4-76742761-76744019	3.31901	0.000451678	Superficial_Epithelial	Promoter	-996	ms4a17a.10	chr4-76742761-76744019@ms4a17a.2
0.0682851	ms4a17a.1	chr4-76742761-76744019	3.34388	0.00041308	Superficial_Epithelial	Promoter	-996	ms4a17a.10	chr4-76742761-76744019@ms4a17a.1
0.0550622	ms4a17a.7	chr4-76742761-76744019	3.22873	0.000621711	Superficial_Epithelial	Promoter	-996	ms4a17a.10	chr4-76742761-76744019@ms4a17a.7
0.0908149	ms4a17a.4	chr4-76742761-76744019	2.80974	0.00247907	Superficial_Epithelial	Promoter	-996	ms4a17a.10	chr4-76742761-76744019@ms4a17a.4
0.0736826	ms4a17a.12	chr4-76742761-76744019	4.37714	6.0123e-06	Superficial_Epithelial	Promoter	-996	ms4a17a.10	chr4-76742761-76744019@ms4a17a.12
0.0557557	ms4a17a.5	chr4-76742761-76744019	2.90168	0.00185582	Superficial_Epithelial	Promoter	-996	ms4a17a.10	chr4-76742761-76744019@ms4a17a.5
0.0880062	slco1d1	chr4-77432296-77432522	8.63861	2.84503e-18	Superficial_Epithelial	Promoter	-78	slco1d1	chr4-77432296-77432522@slco1d1
0.056588	slco1d1	chr4-77471748-77472045	7.31333	1.30302e-13	Superficial_Epithelial	Exon	34317	NA	chr4-77471748-77472045@slco1d1
0.0516805	AL935186.11	chr4-77561195-77561603	4.73057	1.11945e-06	Superficial_Epithelial	Promoter	76	NA	chr4-77561195-77561603@AL935186.11
0.0545456	si:dkey-61p9.7	chr4-77663871-77665180	5.18785	1.0637e-07	Superficial_Epithelial	Exon	2815	si:dkey-61p9.7	chr4-77663871-77665180@si:dkey-61p9.7
0.060669	si:dkey-61p9.9.1	chr4-77761112-77763039	5.80019	3.31199e-09	Superficial_Epithelial	Promoter	0	NA	chr4-77761112-77763039@si:dkey-61p9.9.1
-0.0560165	zgc:158463	chr5-871848-873083	-3.54531	0.000196079	Superficial_Epithelial	Promoter	0	fubp3	chr5-871848-873083@zgc:158463
0.0676765	mbd2	chr5-1034932-1037302	5.77545	3.83729e-09	Superficial_Epithelial	Intron	9920	mbd2	chr5-1034932-1037302@mbd2
0.0729937	mcc	chr5-1763474-1764888	4.45472	4.20023e-06	Superficial_Epithelial	Intron	62687	mcc	chr5-1763474-1764888@mcc
0.0581491	rplp0	chr5-2002625-2003688	2.3005	0.0107099	Superficial_Epithelial	Promoter	0	vkorc1l1	chr5-2002625-2003688@rplp0
0.0638074	hspa5	chr5-2642400-2643328	1.8119	0.0350007	Superficial_Epithelial	Intergenic	-6322	cita	chr5-2642400-2643328@hspa5
0.16622	hspa5	chr5-2711161-2714283	5.70172	5.93006e-09	Superficial_Epithelial	3' UTR	7403	hspa5	chr5-2711161-2714283@hspa5
0.100706	hspa5	chr5-2721029-2722781	3.95688	3.79683e-05	Superficial_Epithelial	Promoter	0	hspa5	chr5-2721029-2722781@hspa5
0.0548471	myo19	chr5-3994452-3995042	3.23437	0.000609568	Superficial_Epithelial	Intergenic	-2797	NA	chr5-3994452-3995042@myo19
0.0683376	sat1a.1	chr5-4331808-4332606	3.60642	0.000155225	Superficial_Epithelial	Promoter	0	sat1a.1	chr5-4331808-4332606@sat1a.1
0.05969	sat1a.2	chr5-4366012-4367399	3.77291	8.06759e-05	Superficial_Epithelial	Promoter	0	sat1a.2	chr5-4366012-4367399@sat1a.2
0.0615305	sat1a.2	chr5-4377392-4378322	3.94575	3.97758e-05	Superficial_Epithelial	Intergenic	10946	sat1a.2	chr5-4377392-4378322@sat1a.2
0.0643589	cst14b.1	chr5-4522323-4524413	2.69163	0.00355524	Superficial_Epithelial	Exon	8103	cst14b.1	chr5-4522323-4524413@cst14b.1
0.07418	cst14b.1	chr5-4525528-4526000	3.89099	4.99189e-05	Superficial_Epithelial	Intron	6516	cst14b.1	chr5-4525528-4526000@cst14b.1
0.0551523	cst14b.1	chr5-4532066-4533756	2.4595	0.00695655	Superficial_Epithelial	Promoter	0	LOC561325	chr5-4532066-4533756@cst14b.1
0.0679116	cst14b.1	chr5-4540207-4542093	2.41478	0.00787241	Superficial_Epithelial	Intron	6963	LOC561325	chr5-4540207-4542093@cst14b.1
0.0733993	angptl2a	chr5-4739774-4740550	3.65626	0.000127962	Superficial_Epithelial	Intergenic	-5632	NA	chr5-4739774-4740550@angptl2a
0.144863	angptl2a	chr5-4796847-4797646	5.11361	1.58029e-07	Superficial_Epithelial	Intergenic	-9205	angptl2a	chr5-4796847-4797646@angptl2a
0.0803234	angptl2a	chr5-4799521-4799859	3.85382	5.81436e-05	Superficial_Epithelial	Intergenic	-6992	angptl2a	chr5-4799521-4799859@angptl2a
0.0901586	angptl2a	chr5-4803892-4805278	2.34565	0.00949704	Superficial_Epithelial	Intergenic	-1573	angptl2a	chr5-4803892-4805278@angptl2a
0.0823943	angptl2a	chr5-4810767-4811798	2.72948	0.00317173	Superficial_Epithelial	Intron	3916	angptl2a	chr5-4810767-4811798@angptl2a
0.0862355	angptl2a	chr5-4812643-4813284	2.90227	0.00185233	Superficial_Epithelial	Intron	5792	angptl2a	chr5-4812643-4813284@angptl2a
0.0930636	angptl2a	chr5-4818354-4819223	2.85634	0.00214276	Superficial_Epithelial	Intron	11503	angptl2a	chr5-4818354-4819223@angptl2a
0.0885101	angptl2a	chr5-4821226-4822134	3.2381	0.000601644	Superficial_Epithelial	Intron	14375	angptl2a	chr5-4821226-4822134@angptl2a
0.0553284	TNC	chr5-5896648-5897351	4.15202	1.6478e-05	Superficial_Epithelial	Intergenic	-65611	zmp:0000000846	chr5-5896648-5897351@TNC
-0.0573088	tnks1bp1	chr5-6470941-6472873	-1.92439	0.0271531	Superficial_Epithelial	Intergenic	35377	crybb3	chr5-6470941-6472873@tnks1bp1
-0.0872062	tnks1bp1	chr5-6616959-6619216	-5.03068	2.44365e-07	Superficial_Epithelial	Promoter	0	msi1a	chr5-6616959-6619216@tnks1bp1
0.0658794	zgc:110796	chr5-6689373-6690119	4.87875	5.33792e-07	Superficial_Epithelial	Intron	-9001	pxna	chr5-6689373-6690119@zgc:110796
0.124971	pxna	chr5-6616959-6619216	5.87549	2.10792e-09	Superficial_Epithelial	Promoter	0	msi1a	chr5-6616959-6619216@pxna
0.0943303	pxna	chr5-6627481-6628268	3.4842	0.000246803	Superficial_Epithelial	Intergenic	10080	msi1a	chr5-6627481-6628268@pxna
0.05513	pxna	chr5-6632197-6633083	1.76661	0.0386464	Superficial_Epithelial	Intergenic	14796	msi1a	chr5-6632197-6633083@pxna
0.0905598	pxna	chr5-6672879-6673392	4.41802	4.98052e-06	Superficial_Epithelial	Promoter	9	pxna	chr5-6672879-6673392@pxna
0.061254	pxna	chr5-6682101-6683408	2.10721	0.0175496	Superficial_Epithelial	Intron	9231	pxna	chr5-6682101-6683408@pxna
0.095583	pxna	chr5-6689373-6690119	3.38993	0.000349547	Superficial_Epithelial	Intron	-9001	pxna	chr5-6689373-6690119@pxna
0.0677148	fgf10b	chr5-8793357-8794082	8.32377	4.26042e-17	Superficial_Epithelial	Intron	23376	fgf10b	chr5-8793357-8794082@fgf10b
0.0582935	fgf10b	chr5-8811920-8812652	6.33338	1.19923e-10	Superficial_Epithelial	Exon	4806	fgf10b	chr5-8811920-8812652@fgf10b
0.0567528	fgf10b	chr5-8832086-8832392	6.33608	1.17842e-10	Superficial_Epithelial	3' UTR	-14245	fgf10b	chr5-8832086-8832392@fgf10b
[truncated: 185,434 more rows]

## Sheet: Table S4B
Table S4 Peak-to-gene links and enhancer validation record
B. Top 3 GO terms of highly regulated genes in each cell type
GroupID	Category	Term	Description	LogP	Log(q-value)	Genes	Symbols	InTerm_InList	cluster	celltype
1_Summary	GO Biological Processes	GO:0016477	cell migration	-18.8303	-14.7953	30105,30512,30519,30701,30741,30744,80353,80963,114424,118437,245702,286831,321107,321243,335269,337179,368249,373103,386787,393995,394125,405902,447799,449557,541320,544658,550377,556148,556471,556523,556726,556743,559454,559784,559896,561295,561437,561589,561895,562018,563421,564123,565032,565429,565658,568117,568593,569217,572261,573024,641492,791144,795785,795788,798402,100005469,100006456,10…	wnt5b,ret,myb,lef1,ctnna1,cbfb,slit2,rnd3a,cdh1,gpc4,igf1rb,lamb4,rap1b,lama5,itgb4,mmp2,prickle1a,pak1,itga5,gpc1b,rhoca,nrp2b,nhsl1b,saa,itga6b,sema3fa,sema6dl,prickle1b,sema5ba,sh3rf1,ctnnd1,sema6e,gpc5a,amotl2b,cd99,sema5a,ndnf,ezrb,sema4c,sh3pxd2aa,amot,col18a1a,hmcn2,hspg2,sema3e,spns2,sdc4,jam3b,sema4ba,lpp,sh3d21,loxl2b,cxcl18b,ccl25b,rhbdf1a,fn1a,fmnl2a,nrg2a,met,itga3b,tenm3,bmp4,runx1,…	180/-	1	BE
2_Summary	GO Biological Processes	GO:0030198	extracellular matrix organization	-16.8184	-13.4076	30449,118437,286831,321298,325675,336471,337158,337176,337179,337298,386787,555202,556634,557257,558224,558919,560115,561437,561679,564123,564821,565032,565402,678531,791144,797252,100036767,100332562,100334431,100535782,101884120	serpinh1b,gpc4,lamb4,col14a1a,col1a1b,col1a2,col1a1a,postnb,mmp2,sulf1,itga5,col11a1b,adamtsl7,col17a1a,ecm2,col10a1a,loxl1,ndnf,col11a2,col18a1a,col5a2a,hmcn2,col11a1a,mmp30,loxl2b,emid1,plod2,col7a1,col5a1,col16a1,adamts17	31/-	1	BE
3_Summary	GO Biological Processes	GO:0007155	cell adhesion	-14.9695	-11.7127	30155,30194,30512,30741,60309,64271,114424,114446,116993,140422,140819,140820,252849,286831,286832,321243,324004,334613,335096,335269,337176,378845,386787,406172,494479,541320,555681,556726,556842,557660,558359,559896,560933,561411,561901,562784,563197,563800,564383,566673,568198,568593,569084,569217,569256,573024,678516,797357,797838,100005469,100318566,100331874,100332562	tenm3,alcama,ret,ctnna1,robo2,epha4a,cdh1,dlg1a,vcana,jag2b,ptprfa,ptprsa,thbs3a,lamb4,lamc1,lama5,ctnnb2,fn1b,ptprub,itgb4,postnb,tjp1a,itga5,fat1a,perp,itga6b,frem2a,ctnnd1,tln2a,palld,afdna,cd99,pvrl2l,yap1,thbs1b,mxra8a,tenm2a,ripor2,frem3,frem2b,pcdh7a,sdc4,cldni,jam3b,fat3a,lpp,tnfaip6,cd44a,pkp1b,fn1a,chl1b,itga3b,col7a1	53/-	1	BE
1_Summary	GO Biological Processes	GO:0001501	skeletal system development	-38.2046	-34.1697	30101,30105,30113,30173,30174,30185,30194,30236,30250,30269,30283,30291,30421,30511,30575,30585,30632,30705,30749,58065,58077,58126,58127,60642,114550,116713,116993,118437,140423,140747,170457,170581,266988,321107,321357,322056,323465,323473,324407,325084,325102,325675,334113,336471,337158,352940,353246,368461,368489,373103,386787,393347,403050,405784,405788,405789,406397,406407,432385,436598,493…	skia,wnt5b,skib,nog3,nog1,nog2,alcama,gja1b,sema3d,shha,wnt11,cdh2,hoxc3a,msx1b,mef2ca,dlx3b,bmp2b,fgfr1a,nr5a2,notch2,zic2a,runx1,runx3,sox9b,ednraa,aldh1a2,vcana,gpc4,jag1b,cxcr4a,s1pr2,cacna1c,smoc2,rap1b,sparc,sulf2b,vcanb,prdm1a,chsy1,src,eif3ea,col1a1b,bcan,col1a2,col1a1a,fgfr2,nrp1a,lpar1,rflna,pak1,itga5,fgfrl1a,pard3ab,runx2a,runx2b,sp7,mmp9,marcksl1a,spp1,pls3,hapln1a,tln1,fgfrl1b,mecom…	253/-	2	MES
2_Summary	GO Biological Processes	GO:0042127	regulation of cell population proliferation	-33.7499	-30.016	30037,30155,30250,30252,30266,30267,30269,30270,30291,30523,30556,30612,30654,30682,30701,30705,58077,58083,58126,58129,58133,60309,64270,64271,80353,80354,80959,116993,286830,317638,323465,323695,324215,325938,334113,336038,352940,353246,359829,359830,359831,368438,368481,368620,369195,373103,378478,386635,403041,403050,405789,405899,406397,406564,407086,407734,447829,493181,493635,494033,541377…	tncb,tenm3,sema3d,sema3h,sema3aa,sema3ab,shha,ngfa,cdh2,tcf7l1a,tcf7l1b,bmp4,gsk3ba,vegfaa,lef1,fgfr1a,zic2a,appa,runx1,fgfr3,ngfb,robo2,epha4b,epha4a,slit2,slit3,pard6gb,vcana,lamb1a,igfbp1a,vcanb,cav1,igf2b,plxna4,bcan,junbb,fgfr2,nrp1a,fgf18a,fgf10a,fgf24,cntfr,stat1b,abcc4,tgfb3,pak1,egfra,erbb3a,zic5,pard3ab,sp7,dip2ba,mmp9,sfpq,junba,gpm6ab,cdc42ep3,fgf7,hapln1a,tfap2c,pid1,sema3fa,sema6dl,…	381/-	2	MES
3_Summary	GO Biological Processes	GO:0000902	cell morphogenesis	-32.6197	-29.0619	30037,30105,30154,30155,30181,30194,30227,30234,30250,30252,30266,30267,30269,30270,30291,30447,30461,30630,30682,30737,30770,58066,58083,58126,58133,60309,64256,80353,80354,114377,114378,114402,114447,118437,140747,245949,266983,286829,286830,286832,321202,323561,325938,334628,337692,352930,353246,368266,368847,386787,386825,393757,404232,405901,405902,406335,406514,406564,436598,445393,494130,4…	tncb,wnt5b,gli2a,tenm3,ptch2,alcama,ntn1a,tnn,sema3d,sema3h,sema3aa,sema3ab,shha,ngfa,cdh2,ncam1a,cdh11,anos1a,vegfaa,elavl4,robo3,notch3,appa,runx1,ngfb,robo2,efna5a,slit2,slit3,efnb1,efnb3b,efnb2b,cxcr4b,gpc4,cxcr4a,vangl2,neo1a,dag1,lamb1a,lamc1,lrrc17,col4a5,plxna4,boc,bsg,gli1,nrp1a,arhgef1a,triob,itga5,ntf3,chchd10,chst11,nrp2a,nrp2b,uba1,atf4a,sfpq,pls3,ppp1r12a,unc5b,efna1b,mecom,cdh6,sem…	160/-	2	MES
1_Summary	GO Biological Processes	GO:0030036	actin cytoskeleton organization	-13.3616	-9.32662	30564,64000,353358,368266,368489,373076,387261,393165,393813,399690,406407,553415,556029,557451,557962,559364,560060,560322,560400,565849,566459,567097,569383,569404,573655,678518,795670,100332627,794486	mef2aa,lima1a,anxa1b,arhgef1a,rflna,tpm3,baiap2l1a,pdlim5b,pdlim7,smtnl,marcksl1a,rhobtb4,diaph2,daam1a,spire1a,shroom1,daam1b,pdlim2,actn1,ppp2r3a,myo1cb,fhl3a,phactr4a,pdlim4,rhof,baiap2a,llgl2,epb41l4b,krt4	29/-	3	IE
2_Summary	GO Biological Processes	GO:0061061	muscle structure development	-5.65025	-2.21736	30564,195815,323329,373076,387533,393165,393813,557356,559054,560322,560400,565849,569404,768121,100006951,103909284	mef2aa,lmna,mat2aa,tpm3,gja3,pdlim5b,pdlim7,mrtfbb,hmgcra,pdlim2,actn1,ppp2r3a,pdlim4,foxo1a,nrg2a,nfixa	16/-	3	IE
3_Summary	GO Biological Processes	GO:0048729	tissue morphogenesis	-5.43345	-2.09747	58083,64271,81584,116993,321243,387533,393813,404045,406407,494130,556029,557551,560060,560091,561589,565849,568117,569383,794613,100006951,114436,245701,368890,555721,556726	appa,epha4a,cldne,vcana,lama5,gja3,pdlim7,traf4a,marcksl1a,unc5b,diaph2,hipk2,daam1b,dsc2l,ezrb,ppp2r3a,spns2,phactr4a,grhl3,nrg2a,dusp5,igf1ra,auts2a,sall1a,ctnnd1	25/-	3	IE
1_Summary	Reactome Gene Sets	R-DRE-6805567	Keratinization	-13.5212	-9.78729	324023,406844,436656,494479,560091,664718,678611,797351,797433,797838,100034647,80959,556726,560400,563421	dspa,krt15,krt97,perp,dsc2l,krt1-19d,krt93,krt5,krt8,pkp1b,krt17,pard6gb,ctnnd1,actn1,amot	15/-	4	SE
2_Summary	Reactome Gene Sets	R-DRE-1266738	Developmental Biology	-10.7821	-7.22423	30267,324023,406844,436656,494151,494479,554232,560091,561440,568718,570636,572001,664718,678611,768121,797351,797433,797838,100034647,100150664,572411	sema3ab,dspa,krt15,krt97,efna1b,perp,ephb2b,dsc2l,ntn4,epha2b,abl2,irs2b,krt1-19d,krt93,foxo1a,krt5,krt8,pkp1b,krt17,met,ephb6	21/-	4	SE
3_Summary	GO Biological Processes	GO:0048729	tissue morphogenesis	-8.8189	-5.5621	30113,30154,30267,64271,64698,80353,80959,81584,118437,260407,321357,325042,353224,353225,368249,373113,378478,406454,494453,555655,556029,559562,560060,560091,565849,568117,751644,796461,798916,100006951,140423,286830,368221,556726,562092,565429,246227,561411,30519,58066,245700,335096,399546	skib,gli2a,sema3ab,epha4a,dcn,slit2,pard6gb,cldne,gpc4,tp63,sparc,tnika,nrarpa,nrarpb,prickle1a,bcl2l10,egfra,epcam,tln1,bmpr2b,diaph2,myo1d,daam1b,dsc2l,ppp2r3a,spns2,wnt9a,nrg1,upk3b,nrg2a,jag1b,lamb1a,tp73,ctnnd1,vgll4l,hspg2,ptgs2a,yap1,myb,notch3,insrb,ptprub,pxna	43/-	4	SE
1_Summary	Reactome Gene Sets	R-DRE-9716542	Signaling by Rho GTPases, Miro GTPases and RHOBTB3	-9.8841	-6.01504	30236,30741,57934,57935,80963,81534,321330,323695,333957,334728,336933,373878,393953,394056,394108,394132,406820,406852,445161,445240,449548,550513,556198,556413,556641,560060,560309,560400,561082,561567,562449,563030,565111,567039,567365,567621,568603,568935,569090,569434,570262,570618,570636,692277,793730,100002689,100002938,100005148,100005174,100005849,100006612,100125271,100332885,100333496,…	gja1b,ctnna1,actb1,actb2,rnd3a,stom,rhpn2,cav1,ndel1b,mapre1b,rhogb,ppp2r5eb,prkcbb,wasf2,stk10,arhgdig,actr2a,nup133,cenpp,fnbp1l,ppp2r1bb,rras2,srgap2,vav2,pld1a,daam1b,hist1h2a1,actn1,cavin1b,srgap3,arhgap32a,iqgap2,peak1,cdc42bpb,akap12b,tiam1a,fam13b,git1,ngef,arhgap32b,srgap1a,hist2h3c,abl2,arhgap10,rasal2,trak1a,cdc42ep4b,ar,dnmbp,rhov,myo9aa,hist1h2a3,hist1h2a10,h2bc1,tiam2a	55/-	5	EM
2_Summary	GO Biological Processes	GO:0030036	actin cytoskeleton organization	-8.78742	-5.45144	30112,30564,30580,30744,64000,80963,140620,140747,259183,321496,325085,336933,368266,368449,368489,393165,393609,394034,394056,399690,406363,406820,445472,494040,503589,541394,550528,555285,557850,557962,558232,558920,559364,560060,560400,560592,561431,561865,562343,563030,563421,567039,567061,567402,568593,569404,678518,678618,100003572,100005849,100006041,100148736,100332627,556198,333957,33715…	svila,mef2aa,mef2d,cbfb,lima1a,rnd3a,prps1a,cxcr4a,tagln2,cfl1,ssh2a,rhogb,arhgef1a,epb41l5,rflna,pdlim5b,myo1eb,waslb,wasf2,smtnl,scinlb,actr2a,myo6b,cd2ap,gna12a,enah,baiap2l1b,myo1ea,trpv4,spire1a,ppp1r9ba,amotl2a,shroom1,daam1b,actn1,myo15aa,myh9b,pdlim3b,specc1,iqgap2,amot,cdc42bpb,espn,myo5b,sdc4,pdlim4,baiap2a,avil,tnnt3b,rhov,rhoab,iqsec1b,epb41l4b,srgap2,ndel1b,col1a1a,spint1a,yap1,ltbp1…	60/-	5	EM
3_Summary	KEGG Pathway	dre04530	Tight junction	-7.93863	-4.74878	57934,57935,58126,60635,81580,81581,81590,117507,322221,327272,335865,368266,373080,373089,403009,405887,406820,445070,449548,474323,474349,558920,560400,561211,561431,561589,563421,567621,792828,100005075,100005261,100005752,100006041,100124652,100332627	actb1,actb2,runx1,cldn7b,cldna,cldnb,cldn1,prkci,actn4,nherf1a,hspa4a,arhgef1a,tuba1b,tjp3,ezra,nf2b,actr2a,cldnk,ppp2r1bb,rap2c,magi1b,amotl2a,actn1,igsf5a,myh9b,ezrb,amot,tiam1a,pard6a,prkcea,jam2a,cgnb,rhoab,pard6b,epb41l4b	35/-	5	EM
1_Summary	GO Biological Processes	GO:1902531	regulation of intracellular signal transduction	-13.4705	-9.43559	30081,64274,114401,114436,245700,245702,321938,323588,323827,324948,325042,325084,325586,327246,353314,368266,368415,368779,373874,393651,393854,393953,394077,394099,402921,403145,404045,405770,406308,406361,406523,431769,436964,445057,445119,447938,449958,492787,492792,550452,550605,553596,553769,555476,556029,556380,556523,556823,557335,557526,558211,558476,558626,559329,559941,560275,560594,56…	ptpn1,csf1ra,bcl2l1,dusp5,insrb,igf1rb,cyth1a,pik3r5,dennd2b,adgrg1,tnika,src,cyth1b,dusp7,dusp6,arhgef1a,ptenb,phlda3,ripk2,grap2b,dusp8a,prkcbb,pde10a,arrb2b,bcor,myd88,traf4a,il1b,grb2b,dok1b,dusp16,pak4,gpr137,dusp2,traf3,rassf2a,tnip1,cadm4,gpr137c,grap2a,schip1,grapa,tpd52l1,shoc2,diaph2,ddr2a,sh3rf1,cylda,nlrx1,traf2b,dennd4a,stard8,dennd4c,psd3l,arhgef28a,nuak2,garnl3,robo4,wwc1,sipa1l3,r…	143/-	6	HEM
2_Summary	GO Biological Processes	GO:0016477	cell migration	-12.6951	-8.96114	30273,30519,30685,30701,30741,30744,30767,64274,64617,80963,114447,117507,118437,140747,170457,245702,245949,252845,266753,317741,321107,321243,321505,325084,335269,336333,336933,337571,337690,353224,373882,378958,386787,387293,393202,393995,394087,394125,394244,403040,403145,405770,405902,406397,406575,406796,406816,407621,407685,407694,415151,447799,447804,494109,503589,544660,553366,555362,556…	snai1a,myb,aanat2,lef1,ctnna1,cbfb,stat3,csf1ra,s1pr1,rnd3a,cxcr4b,prkci,gpc4,cxcr4a,s1pr2,igf1rb,vangl2,pals1a,acvrl1,coro1ca,rap1b,lama5,bmi1a,src,itgb4,gna13b,rhogb,yrk,pikfyve,nrarpa,mmp14a,dmxl2,itga5,mmp13a,hif1ab,gpc1b,arl6ip1,rhoca,ndel1a,dock8,myd88,il1b,nrp2b,mmp9,lta4h,gnb1b,cul1b,disc1,itga3a,fmnl3,rac2,nhsl1b,lyn,ch25h,gna12a,sema3gb,ccr9a,tns1b,diaph2,prickle1b,vav2,sh3rf1,ctnnd1,cm…	132/-	6	HEM
3_Summary	KEGG Pathway	dre04625	C-type lectin receptor signaling pathway	-10.9888	-7.55591	65237,321808,323099,325084,327321,334202,360144,368481,404211,405769,405770,406463,415100,550513,556277,556823,559020,560549,561747,561772,562585,562720,565200,565656,565756,566869,571031,792160,795414,796425,100002263,100004261,100006041,100101464,100149388,100150844,100333254,393953,415151,790934,100333967	mapk14a,calm3b,nfkbiab,src,mapkapk2a,plk3,mapk1,stat1b,pik3r2,syk,il1b,nfkbiaa,nfkb2,rras2,cblb,cylda,ptgs2b,akt3a,plcg2,nfatc3a,itpr2,mapk8a,stat2,bcl3,nfkb1,nfatc3b,arhgef12b,irf1b,relb,card9,pik3cb,map3k14a,rhoab,fcer1g,itpr1b,prkcdb,nfatc2a,prkcbb,rac2,mapkapk3,prkcab	41/-	6	HEM

## Sheet: Table S4C
Table S4 Peak-to-gene links and enhancer validation record
C. Cell type subset identified peak-to-gene links between RRRs and RRGs
peak-to-gene correlation coefficient score	gene	peak	peak-to-gene correlation coefficient zscore	pvalue	peak-to-gene subset	RRG_anno	RRR_anno
0.0601913	slitrk6	chr1-4164855-4165850	2.42285	0.00769964	Superficial_Epithelial	Superficial_Epithelial_upRRG	Superficial_Epithelial_openRRR
0.241007	fn1b	chr1-5547875-5549253	5.38987	3.52549e-08	Superficial_Epithelial	Superficial_Epithelial_upRRG	Superficial_Epithelial_openRRR
0.0530698	si:dkey-79f11.10	chr1-7930458-7931298	4.08025	2.24937e-05	Superficial_Epithelial	Superficial_Epithelial_upRRG	Superficial_Epithelial_closeRRR
0.0533304	si:dkey-79f11.7	chr1-7930458-7931298	5.21814	9.03634e-08	Superficial_Epithelial	Superficial_Epithelial_upRRG	Superficial_Epithelial_closeRRR
0.0908796	si:dkeyp-9d4.2	chr1-7930458-7931298	6.74627	7.58464e-12	Superficial_Epithelial	Superficial_Epithelial_upRRG	Superficial_Epithelial_closeRRR
0.0571762	FAM83G	chr1-8122786-8123901	2.23501	0.0127085	Superficial_Epithelial	Superficial_Epithelial_upRRG	Superficial_Epithelial_openRRR
0.06759	sh3d19	chr1-24460680-24461583	3.93793	4.10936e-05	Superficial_Epithelial	Superficial_Epithelial_upRRG	Superficial_Epithelial_openRRR
0.0509074	fbxw7	chr1-25201262-25202457	2.0028	0.0225993	Superficial_Epithelial	Superficial_Epithelial_upRRG	Superficial_Epithelial_openRRR
0.14696	raph1b	chr1-29682073-29682913	6.3056	1.43542e-10	Superficial_Epithelial	Superficial_Epithelial_upRRG	Superficial_Epithelial_openRRR
0.152966	arhgap10	chr1-36823341-36824818	5.42818	2.84659e-08	Superficial_Epithelial	Superficial_Epithelial_upRRG	Superficial_Epithelial_openRRR
0.0790526	zdhhc5a	chr1-44540645-44541462	4.68712	1.38541e-06	Superficial_Epithelial	Superficial_Epithelial_upRRG	Superficial_Epithelial_openRRR
0.0829752	zdhhc5a	chr1-44555457-44556296	4.91207	4.50598e-07	Superficial_Epithelial	Superficial_Epithelial_upRRG	Superficial_Epithelial_openRRR
0.0593883	gsk3bb	chr1-49497084-49498820	3.79026	7.5244e-05	Superficial_Epithelial	Superficial_Epithelial_downRRG	Superficial_Epithelial_openRRR
0.112	zgc:175214	chr1-49497084-49498820	4.46348	4.03197e-06	Superficial_Epithelial	Superficial_Epithelial_upRRG	Superficial_Epithelial_openRRR
0.0547462	si:ch211-281g13.4	chr1-49557906-49558676	5.27336	6.69728e-08	Superficial_Epithelial	Superficial_Epithelial_upRRG	Superficial_Epithelial_closeRRR
0.196639	srd5a2a	chr1-51085614-51087558	5.85552	2.37762e-09	Superficial_Epithelial	Superficial_Epithelial_downRRG	Superficial_Epithelial_openRRR
0.267302	jag1a	chr1-51085614-51087558	5.5486	1.43986e-08	Superficial_Epithelial	Superficial_Epithelial_upRRG	Superficial_Epithelial_openRRR
0.0594598	zgc:194101	chr1-52451344-52452491	4.47298	3.85677e-06	Superficial_Epithelial	Superficial_Epithelial_upRRG	Superficial_Epithelial_openRRR
0.0920474	si:ch211-217k17.10	chr1-52451344-52452491	5.207	9.59576e-08	Superficial_Epithelial	Superficial_Epithelial_upRRG	Superficial_Epithelial_openRRR
0.0687827	abca1a	chr1-52572526-52573786	2.1958	0.0140533	Superficial_Epithelial	Superficial_Epithelial_upRRG	Superficial_Epithelial_openRRR
0.0943598	inpp4b	chr1-53007278-53008628	5.09299	1.76233e-07	Superficial_Epithelial	Superficial_Epithelial_upRRG	Superficial_Epithelial_openRRR
0.106268	LO018605.3	chr1-56691057-56691584	9.36735	3.71895e-21	Superficial_Epithelial	Superficial_Epithelial_upRRG	Superficial_Epithelial_openRRR
-0.0646422	FP236157.7	chr1-59532503-59533501	-4.30289	8.4294e-06	Superficial_Epithelial	Superficial_Epithelial_downRRG	Superficial_Epithelial_openRRR
0.0819126	sp6	chr1-59532503-59533501	4.98627	3.07777e-07	Superficial_Epithelial	Superficial_Epithelial_upRRG	Superficial_Epithelial_openRRR
0.0568903	sp6	chr1-59534072-59535161	3.39442	0.00034387	Superficial_Epithelial	Superficial_Epithelial_upRRG	Superficial_Epithelial_openRRR
0.0650272	dspa	chr2-2044027-2045845	2.30232	0.0106585	Superficial_Epithelial	Superficial_Epithelial_upRRG	Superficial_Epithelial_openRRR
0.0546863	egfra	chr2-3727387-3728348	2.85255	0.00216851	Superficial_Epithelial	Superficial_Epithelial_upRRG	Superficial_Epithelial_openRRR
0.102147	ptgs2a	chr2-20899609-20900180	5.34601	4.49562e-08	Superficial_Epithelial	Superficial_Epithelial_upRRG	Superficial_Epithelial_openRRR
0.110146	ptgs2a	chr2-20902335-20903273	4.47814	3.76476e-06	Superficial_Epithelial	Superficial_Epithelial_upRRG	Superficial_Epithelial_openRRR
0.0835566	ptgs2a	chr2-20937304-20938830	2.96171	0.00152966	Superficial_Epithelial	Superficial_Epithelial_upRRG	Superficial_Epithelial_openRRR
0.066794	pla2g4aa	chr2-20937304-20938830	4.04205	2.64926e-05	Superficial_Epithelial	Superficial_Epithelial_upRRG	Superficial_Epithelial_openRRR
0.0737239	rasal2	chr2-35740103-35740732	5.27001	6.82072e-08	Superficial_Epithelial	Superficial_Epithelial_upRRG	Superficial_Epithelial_openRRR
0.0729567	pak2a	chr2-36615836-36617854	2.92006	0.00174983	Superficial_Epithelial	Superficial_Epithelial_upRRG	Superficial_Epithelial_openRRR
0.0503358	skila	chr2-37371583-37372271	3.92241	4.38329e-05	Superficial_Epithelial	Superficial_Epithelial_upRRG	Superficial_Epithelial_openRRR
0.180591	epha4a	chr2-40096480-40097874	5.38439	3.63447e-08	Superficial_Epithelial	Superficial_Epithelial_upRRG	Superficial_Epithelial_openRRR
0.0944771	keap1a	chr2-41828303-41829647	7.64478	1.04648e-14	Superficial_Epithelial	Superficial_Epithelial_upRRG	Superficial_Epithelial_openRRR
0.0574769	dad1	chr2-51728895-51729879	2.598	0.00468841	Superficial_Epithelial	Superficial_Epithelial_upRRG	Superficial_Epithelial_closeRRR
0.17552	tgm1l1	chr2-51728895-51729879	7.60526	1.42169e-14	Superficial_Epithelial	Superficial_Epithelial_upRRG	Superficial_Epithelial_closeRRR
0.0644479	dhx58	chr3-17679837-17681516	3.98636	3.35467e-05	Superficial_Epithelial	Superficial_Epithelial_upRRG	Superficial_Epithelial_closeRRR
0.0531349	zgc:171506	chr3-24603113-24604527	3.88554	5.10517e-05	Superficial_Epithelial	Superficial_Epithelial_upRRG	Superficial_Epithelial_closeRRR
0.0526412	zmp:0000000912	chr3-24603113-24604527	4.12768	1.83218e-05	Superficial_Epithelial	Superficial_Epithelial_upRRG	Superficial_Epithelial_closeRRR
0.0596729	zmp:0000000912	chr3-24650088-24651069	4.20268	1.31884e-05	Superficial_Epithelial	Superficial_Epithelial_upRRG	Superficial_Epithelial_openRRR
0.052407	gosr2	chr3-37644353-37645354	4.41675	5.00975e-06	Superficial_Epithelial	Superficial_Epithelial_upRRG	Superficial_Epithelial_openRRR
0.0858754	ppap2d	chr3-47322173-47324172	1.75045	0.0400204	Superficial_Epithelial	Superficial_Epithelial_upRRG	Superficial_Epithelial_openRRR
0.0828423	ppap2d	chr3-47325707-47326743	1.77013	0.0383524	Superficial_Epithelial	Superficial_Epithelial_upRRG	Superficial_Epithelial_openRRR
0.0969134	metrnla	chr3-48429474-48430895	2.25999	0.0119108	Superficial_Epithelial	Superficial_Epithelial_upRRG	Superficial_Epithelial_openRRR
0.145096	metrnla	chr3-48541647-48542450	4.21526	1.24744e-05	Superficial_Epithelial	Superficial_Epithelial_upRRG	Superficial_Epithelial_openRRR
0.261659	notch3	chr3-53655204-53656437	6.70014	1.04107e-11	Superficial_Epithelial	Superficial_Epithelial_upRRG	Superficial_Epithelial_closeRRR
0.100088	sc:d0202.1	chr3-54799714-54800891	5.71967	5.33659e-09	Superficial_Epithelial	Superficial_Epithelial_upRRG	Superficial_Epithelial_openRRR
0.103179	sc:d0202.1	chr3-54820481-54822028	4.86059	5.85193e-07	Superficial_Epithelial	Superficial_Epithelial_upRRG	Superficial_Epithelial_openRRR
0.0545915	ubald1b	chr3-54799714-54800891	2.05674	0.0198556	Superficial_Epithelial	Superficial_Epithelial_upRRG	Superficial_Epithelial_openRRR
0.0806866	ubald1b	chr3-54820481-54822028	3.68068	0.000116307	Superficial_Epithelial	Superficial_Epithelial_upRRG	Superficial_Epithelial_openRRR
0.0629587	rhbdf1a	chr3-55035373-55036408	2.18192	0.0145576	Superficial_Epithelial	Superficial_Epithelial_upRRG	Superficial_Epithelial_openRRR
0.153989	rnf213a	chr3-56704670-56705404	8.69842	1.68276e-18	Superficial_Epithelial	Superficial_Epithelial_upRRG	Superficial_Epithelial_openRRR
0.0762604	slc38a2	chr4-1566442-1567427	2.58374	0.0048868	Superficial_Epithelial	Superficial_Epithelial_upRRG	Superficial_Epithelial_openRRR
0.123027	plekha5	chr4-3054203-3055181	4.0115	3.01665e-05	Superficial_Epithelial	Superficial_Epithelial_upRRG	Superficial_Epithelial_openRRR
0.101591	plekha5	chr4-3077857-3079214	2.13957	0.0161946	Superficial_Epithelial	Superficial_Epithelial_upRRG	Superficial_Epithelial_openRRR
0.110074	plekha5	chr4-3101069-3102123	2.37179	0.00885116	Superficial_Epithelial	Superficial_Epithelial_upRRG	Superficial_Epithelial_openRRR
0.0673214	wnk1b	chr4-8138709-8139854	2.99521	0.00137127	Superficial_Epithelial	Superficial_Epithelial_downRRG	Superficial_Epithelial_openRRR
0.0831348	wnt5b	chr4-8616139-8617212	2.36731	0.00895896	Superficial_Epithelial	Superficial_Epithelial_upRRG	Superficial_Epithelial_openRRR
0.0939295	chst11	chr4-9172802-9173680	3.95806	3.77806e-05	Superficial_Epithelial	Superficial_Epithelial_upRRG	Superficial_Epithelial_openRRR
0.0663296	yaf2	chr4-13916846-13917655	5.64405	8.30471e-09	Superficial_Epithelial	Superficial_Epithelial_upRRG	Superficial_Epithelial_openRRR
0.125106	nav3	chr4-20755467-20756338	3.46697	0.000263176	Superficial_Epithelial	Superficial_Epithelial_upRRG	Superficial_Epithelial_openRRR
0.0653367	ppp1r12a	chr4-21538800-21539988	3.31472	0.000458677	Superficial_Epithelial	Superficial_Epithelial_upRRG	Superficial_Epithelial_openRRR
0.103409	ppp1r12a	chr4-21595018-21595873	7.39621	7.00621e-14	Superficial_Epithelial	Superficial_Epithelial_upRRG	Superficial_Epithelial_openRRR
-0.0872062	tnks1bp1	chr5-6616959-6619216	-5.03068	2.44365e-07	Superficial_Epithelial	Superficial_Epithelial_downRRG	Superficial_Epithelial_openRRR
0.0577872	sdf2l1	chr5-13390385-13391063	3.14506	0.00083026	Superficial_Epithelial	Superficial_Epithelial_upRRG	Superficial_Epithelial_openRRR
0.173218	ccl19a.1	chr5-13385210-13385993	15.6611	1.3941e-55	Superficial_Epithelial	Superficial_Epithelial_upRRG	Superficial_Epithelial_closeRRR
0.0670298	ccl19a.1	chr5-13390385-13391063	5.76105	4.17959e-09	Superficial_Epithelial	Superficial_Epithelial_upRRG	Superficial_Epithelial_openRRR
0.0581818	ube2l3b	chr5-13385210-13385993	4.99928	2.87719e-07	Superficial_Epithelial	Superficial_Epithelial_upRRG	Superficial_Epithelial_closeRRR
0.0832773	fbrsl1	chr5-17624205-17625455	3.21322	0.000656271	Superficial_Epithelial	Superficial_Epithelial_upRRG	Superficial_Epithelial_openRRR
0.058059	eif4a1b	chr5-24169406-24170481	2.64169	0.00412473	Superficial_Epithelial	Superficial_Epithelial_upRRG	Superficial_Epithelial_openRRR
0.0541407	arpc5lb	chr5-32026431-32027648	2.83051	0.00232369	Superficial_Epithelial	Superficial_Epithelial_upRRG	Superficial_Epithelial_openRRR
0.0812224	wdfy3	chr5-40242404-40243142	2.7523	0.00295893	Superficial_Epithelial	Superficial_Epithelial_upRRG	Superficial_Epithelial_openRRR
0.158784	pdzd2	chr5-40994055-40995460	3.97744	3.48301e-05	Superficial_Epithelial	Superficial_Epithelial_upRRG	Superficial_Epithelial_openRRR
0.171854	aqp3a	chr5-42967315-42968659	3.3765	0.000367068	Superficial_Epithelial	Superficial_Epithelial_upRRG	Superficial_Epithelial_openRRR
0.168098	aqp3a	chr5-42998577-43000166	3.80082	7.21091e-05	Superficial_Epithelial	Superficial_Epithelial_upRRG	Superficial_Epithelial_openRRR
0.177484	aqp3a	chr5-43005655-43006776	3.65137	0.000130422	Superficial_Epithelial	Superficial_Epithelial_upRRG	Superficial_Epithelial_openRRR
0.0649312	RTKN	chr5-43734601-43736481	3.02901	0.0012268	Superficial_Epithelial	Superficial_Epithelial_upRRG	Superficial_Epithelial_openRRR
0.0617552	RTKN	chr5-43744532-43745110	3.22257	0.000635237	Superficial_Epithelial	Superficial_Epithelial_upRRG	Superficial_Epithelial_openRRR
0.0771937	cert1a	chr5-50936788-50937544	5.23922	8.06288e-08	Superficial_Epithelial	Superficial_Epithelial_upRRG	Superficial_Epithelial_openRRR
0.162874	upk3b	chr5-59251874-59252954	5.977	1.13643e-09	Superficial_Epithelial	Superficial_Epithelial_upRRG	Superficial_Epithelial_openRRR
0.0876596	upk3b	chr5-59255131-59255883	3.44499	0.000285535	Superficial_Epithelial	Superficial_Epithelial_upRRG	Superficial_Epithelial_openRRR
0.108562	upk3b	chr5-59308895-59309937	3.57364	0.000176029	Superficial_Epithelial	Superficial_Epithelial_upRRG	Superficial_Epithelial_openRRR
0.050484	rasa4	chr5-59255131-59255883	2.9464	0.00160751	Superficial_Epithelial	Superficial_Epithelial_upRRG	Superficial_Epithelial_openRRR
0.0542454	rasa4	chr5-59277897-59278805	3.11294	0.000926163	Superficial_Epithelial	Superficial_Epithelial_upRRG	Superficial_Epithelial_openRRR
0.110415	rasa4	chr5-59289485-59290560	7.07105	7.68808e-13	Superficial_Epithelial	Superficial_Epithelial_upRRG	Superficial_Epithelial_openRRR
0.0698581	rasa4	chr5-59303387-59304504	3.99557	3.22693e-05	Superficial_Epithelial	Superficial_Epithelial_upRRG	Superficial_Epithelial_openRRR
0.109038	rasa4	chr5-59308895-59309937	6.78437	5.82983e-12	Superficial_Epithelial	Superficial_Epithelial_upRRG	Superficial_Epithelial_openRRR
0.0707182	nrarpb	chr5-66125518-66126816	2.28123	0.0112675	Superficial_Epithelial	Superficial_Epithelial_upRRG	Superficial_Epithelial_openRRR
0.114642	smtnb	chr5-69408507-69409397	10.2419	6.4337e-25	Superficial_Epithelial	Superficial_Epithelial_upRRG	Superficial_Epithelial_openRRR
0.0989239	FQ311924.2	chr5-69408507-69409397	6.25199	2.02627e-10	Superficial_Epithelial	Superficial_Epithelial_upRRG	Superficial_Epithelial_openRRR
0.0508489	ugt2a4	chr5-69907595-69909706	2.56212	0.00520173	Superficial_Epithelial	Superficial_Epithelial_upRRG	Superficial_Epithelial_openRRR
0.0989544	tbx3a	chr5-72325694-72326004	11.4714	9.18632e-31	Superficial_Epithelial	Superficial_Epithelial_upRRG	Superficial_Epithelial_openRRR
0.10415	baz2ba	chr6-11887474-11889598	5.6836	6.59453e-09	Superficial_Epithelial	Superficial_Epithelial_upRRG	Superficial_Epithelial_openRRR
0.0517212	bmpr2a	chr6-12883949-12885182	2.36917	0.00891396	Superficial_Epithelial	Superficial_Epithelial_upRRG	Superficial_Epithelial_openRRR
0.0670326	inpp4ab	chr6-14286489-14287794	6.47868	4.62646e-11	Superficial_Epithelial	Superficial_Epithelial_upRRG	Superficial_Epithelial_openRRR
0.0529367	p4hb	chr6-18219597-18221152	2.31221	0.010383	Superficial_Epithelial	Superficial_Epithelial_upRRG	Superficial_Epithelial_openRRR
0.115314	scinla	chr6-24105438-24106502	2.9935	0.00137898	Superficial_Epithelial	Superficial_Epithelial_upRRG	Superficial_Epithelial_openRRR
0.0829601	tgfbr3	chr6-24427861-24428483	1.89259	0.0292063	Superficial_Epithelial	Superficial_Epithelial_upRRG	Superficial_Epithelial_openRRR
0.0767403	lepr	chr6-31227745-31228766	7.38391	7.68511e-14	Superficial_Epithelial	Superficial_Epithelial_downRRG	Superficial_Epithelial_openRRR
0.0572237	nos1apa	chr6-35264720-35266364	3.45066	0.000279613	Superficial_Epithelial	Superficial_Epithelial_upRRG	Superficial_Epithelial_openRRR
0.128782	col7a1	chr6-40284618-40285487	3.54083	0.000199436	Superficial_Epithelial	Superficial_Epithelial_upRRG	Superficial_Epithelial_openRRR
-0.0592025	CABZ01079267.1	chr6-59957440-59959305	-4.61689	1.94768e-06	Superficial_Epithelial	Superficial_Epithelial_downRRG	Superficial_Epithelial_openRRR
0.121656	pmepa1	chr6-60093451-60095492	4.64566	1.69494e-06	Superficial_Epithelial	Superficial_Epithelial_upRRG	Superficial_Epithelial_openRRR
0.151414	CR926130.1	chr7-979372-980414	8.90485	2.673e-19	Superficial_Epithelial	Superficial_Epithelial_upRRG	Superficial_Epithelial_openRRR
0.0770741	cxcl8b.1	chr7-7872786-7873739	3.09303	0.000990614	Superficial_Epithelial	Superficial_Epithelial_downRRG	Superficial_Epithelial_openRRR
0.130853	si:ch211-163c2.1	chr7-8194610-8196128	11.4184	1.69163e-30	Superficial_Epithelial	Superficial_Epithelial_upRRG	Superficial_Epithelial_openRRR
0.0729886	rtn3	chr7-17733885-17734615	4.47853	3.75799e-06	Superficial_Epithelial	Superficial_Epithelial_upRRG	Superficial_Epithelial_openRRR
0.174219	rgs12a	chr7-18593407-18594810	5.67441	6.95832e-09	Superficial_Epithelial	Superficial_Epithelial_upRRG	Superficial_Epithelial_openRRR
0.12471	txn	chr7-24355114-24356762	3.1002	0.000966935	Superficial_Epithelial	Superficial_Epithelial_upRRG	Superficial_Epithelial_openRRR
0.157011	txn	chr7-24362450-24363679	3.8438	6.05729e-05	Superficial_Epithelial	Superficial_Epithelial_upRRG	Superficial_Epithelial_openRRR
0.160615	txn	chr7-24364117-24364979	4.16029	1.58925e-05	Superficial_Epithelial	Superficial_Epithelial_upRRG	Superficial_Epithelial_openRRR
0.105089	txn	chr7-24412034-24413068	2.24632	0.0123418	Superficial_Epithelial	Superficial_Epithelial_upRRG	Superficial_Epithelial_closeRRR
0.223339	sb:cb1058	chr7-25032870-25034139	5.64032	8.48683e-09	Superficial_Epithelial	Superficial_Epithelial_upRRG	Superficial_Epithelial_openRRR
0.267334	dennd2b	chr7-28547058-28549784	6.2884	1.60381e-10	Superficial_Epithelial	Superficial_Epithelial_upRRG	Superficial_Epithelial_openRRR
-0.0576676	si:ch211-98n17.5	chr7-34213699-34215866	-2.62405	0.00434459	Superficial_Epithelial	Superficial_Epithelial_downRRG	Superficial_Epithelial_openRRR
0.0900016	sall1a	chr7-37258543-37259918	2.55253	0.00534715	Superficial_Epithelial	Superficial_Epithelial_upRRG	Superficial_Epithelial_openRRR
0.071046	sall1a	chr7-37300547-37301615	2.31953	0.0101833	Superficial_Epithelial	Superficial_Epithelial_upRRG	Superficial_Epithelial_openRRR
0.0732418	sall1a	chr7-37304839-37305323	3.02094	0.00125997	Superficial_Epithelial	Superficial_Epithelial_upRRG	Superficial_Epithelial_openRRR
0.121696	sall1a	chr7-37376170-37377623	4.7123	1.2247e-06	Superficial_Epithelial	Superficial_Epithelial_upRRG	Superficial_Epithelial_openRRR
0.179657	mdka	chr7-39168418-39170487	6.23471	2.26304e-10	Superficial_Epithelial	Superficial_Epithelial_upRRG	Superficial_Epithelial_openRRR
0.295309	lsp1b	chr7-39423861-39425641	6.47807	4.64516e-11	Superficial_Epithelial	Superficial_Epithelial_upRRG	Superficial_Epithelial_openRRR
0.209665	tnnt3b	chr7-39423861-39425641	4.77224	9.10934e-07	Superficial_Epithelial	Superficial_Epithelial_upRRG	Superficial_Epithelial_openRRR
0.0740885	ppp1r14bb	chr7-60379208-60380714	2.37875	0.00868578	Superficial_Epithelial	Superficial_Epithelial_downRRG	Superficial_Epithelial_openRRR
0.0525729	pcdh7b	chr7-63390094-63390866	2.10168	0.0177906	Superficial_Epithelial	Superficial_Epithelial_upRRG	Superficial_Epithelial_openRRR
0.0980117	ccl27a	chr8-1162306-1163164	3.9068	4.67631e-05	Superficial_Epithelial	Superficial_Epithelial_upRRG	Superficial_Epithelial_openRRR
0.0816907	ccl27a	chr8-1176304-1177224	2.76431	0.0028522	Superficial_Epithelial	Superficial_Epithelial_upRRG	Superficial_Epithelial_openRRR
0.0916033	dynll1	chr8-2495700-2496686	5.75394	4.35935e-09	Superficial_Epithelial	Superficial_Epithelial_upRRG	Superficial_Epithelial_openRRR
0.139862	sema6bb	chr8-19090989-19092012	5.69564	6.14544e-09	Superficial_Epithelial	Superficial_Epithelial_upRRG	Superficial_Epithelial_openRRR
0.0717017	slc16a1b	chr8-26954852-26956705	3.54962	0.000192895	Superficial_Epithelial	Superficial_Epithelial_upRRG	Superficial_Epithelial_openRRR
0.07239	tspan36	chr8-29755416-29756074	4.94936	3.72283e-07	Superficial_Epithelial	Superficial_Epithelial_upRRG	Superficial_Epithelial_openRRR
0.193623	vgll4l	chr8-31088460-31089351	4.05902	2.46398e-05	Superficial_Epithelial	Superficial_Epithelial_upRRG	Superficial_Epithelial_closeRRR
0.154516	ggt1a	chr8-40071488-40073404	5.5555	1.38406e-08	Superficial_Epithelial	Superficial_Epithelial_upRRG	Superficial_Epithelial_openRRR
0.123943	rflna	chr8-43331882-43332941	5.15235	1.28624e-07	Superficial_Epithelial	Superficial_Epithelial_upRRG	Superficial_Epithelial_openRRR
0.058309	CU984600.1	chr9-551192-552362	2.2427	0.0124582	Superficial_Epithelial	Superficial_Epithelial_upRRG	Superficial_Epithelial_openRRR
0.0500231	nck2a	chr9-6458997-6459946	4.10874	1.98911e-05	Superficial_Epithelial	Superficial_Epithelial_downRRG	Superficial_Epithelial_openRRR
0.0716858	sik1	chr9-9093439-9094735	4.46101	4.0787e-06	Superficial_Epithelial	Superficial_Epithelial_downRRG	Superficial_Epithelial_openRRR
-0.0848251	mid1ip1a	chr9-30300541-30302638	-3.47462	0.000255789	Superficial_Epithelial	Superficial_Epithelial_downRRG	Superficial_Epithelial_openRRR
0.0606605	usp9	chr9-33283026-33284323	3.68867	0.000112714	Superficial_Epithelial	Superficial_Epithelial_upRRG	Superficial_Epithelial_openRRR
0.113131	tfpia	chr9-42455785-42456736	2.08958	0.0183277	Superficial_Epithelial	Superficial_Epithelial_upRRG	Superficial_Epithelial_openRRR
0.17166	tfpia	chr9-42466683-42468709	4.1999	1.33519e-05	Superficial_Epithelial	Superficial_Epithelial_upRRG	Superficial_Epithelial_openRRR
0.0521467	cx43.4	chr9-46385844-46387153	3.67716	0.000117925	Superficial_Epithelial	Superficial_Epithelial_downRRG	Superficial_Epithelial_openRRR
0.0589165	epb41l4a	chr10-1815887-1817706	2.87996	0.00198866	Superficial_Epithelial	Superficial_Epithelial_upRRG	Superficial_Epithelial_openRRR
0.150395	CABZ01073795.1	chr10-4373805-4375701	8.11894	2.35145e-16	Superficial_Epithelial	Superficial_Epithelial_upRRG	Superficial_Epithelial_openRRR
0.0989386	plk2a	chr10-4522927-4524125	4.10416	2.02893e-05	Superficial_Epithelial	Superficial_Epithelial_upRRG	Superficial_Epithelial_openRRR
0.0590996	rasgef1bb	chr10-9136730-9137925	2.82228	0.0023842	Superficial_Epithelial	Superficial_Epithelial_upRRG	Superficial_Epithelial_openRRR
0.14069	nrarpa	chr10-10894558-10895331	5.5427	1.48923e-08	Superficial_Epithelial	Superficial_Epithelial_upRRG	Superficial_Epithelial_openRRR
0.0953854	cblb	chr10-28645081-28646170	2.50284	0.00616008	Superficial_Epithelial	Superficial_Epithelial_upRRG	Superficial_Epithelial_openRRR
0.0856611	cux1a	chr10-33070260-33071021	4.02287	2.87463e-05	Superficial_Epithelial	Superficial_Epithelial_upRRG	Superficial_Epithelial_openRRR
0.095765	C10H21orf91	chr10-35071386-35072643	2.59092	0.00478601	Superficial_Epithelial	Superficial_Epithelial_upRRG	Superficial_Epithelial_openRRR
0.0862123	ripk4	chr10-35071386-35072643	2.59619	0.0047132	Superficial_Epithelial	Superficial_Epithelial_upRRG	Superficial_Epithelial_openRRR
0.0762474	C10H21orf91	chr10-35174650-35175557	2.05346	0.020014	Superficial_Epithelial	Superficial_Epithelial_upRRG	Superficial_Epithelial_openRRR
0.0721542	ripk4	chr10-35174650-35175557	1.85342	0.0319113	Superficial_Epithelial	Superficial_Epithelial_upRRG	Superficial_Epithelial_openRRR
0.19972	dhrs13a.2	chr10-36783493-36784893	9.50189	1.0306e-21	Superficial_Epithelial	Superficial_Epithelial_downRRG	Superficial_Epithelial_closeRRR
-0.0570107	alas1	chr11-361335-363011	-4.34052	7.10739e-06	Superficial_Epithelial	Superficial_Epithelial_downRRG	Superficial_Epithelial_openRRR
0.230071	krt93	chr11-11451752-11453380	8.60192	3.91966e-18	Superficial_Epithelial	Superficial_Epithelial_upRRG	Superficial_Epithelial_openRRR
0.0973537	krt94	chr11-11451752-11453380	2.32971	0.00991067	Superficial_Epithelial	Superficial_Epithelial_upRRG	Superficial_Epithelial_openRRR
0.233694	elovl1b	chr11-13125987-13127488	5.03562	2.38147e-07	Superficial_Epithelial	Superficial_Epithelial_upRRG	Superficial_Epithelial_openRRR
0.0752305	atp5f1b	chr11-13125987-13127488	3.53454	0.000204244	Superficial_Epithelial	Superficial_Epithelial_upRRG	Superficial_Epithelial_openRRR
0.11851	homer3b	chr11-13451871-13453342	3.69609	0.000109472	Superficial_Epithelial	Superficial_Epithelial_upRRG	Superficial_Epithelial_openRRR
0.151206	si:ch211-1a19.3	chr11-13629553-13630741	9.19798	1.82378e-20	Superficial_Epithelial	Superficial_Epithelial_upRRG	Superficial_Epithelial_openRRR
0.0744824	id1	chr11-18731781-18732626	3.55005	0.000192577	Superficial_Epithelial	Superficial_Epithelial_upRRG	Superficial_Epithelial_openRRR
0.234916	ogfrl2	chr11-20090640-20091421	12.8839	2.77322e-38	Superficial_Epithelial	Superficial_Epithelial_upRRG	Superficial_Epithelial_openRRR
0.128093	foxp4	chr11-21958642-21960289	4.55322	2.6415e-06	Superficial_Epithelial	Superficial_Epithelial_upRRG	Superficial_Epithelial_openRRR
0.0777911	ephb2b	chr11-28224073-28225728	4.87381	5.47332e-07	Superficial_Epithelial	Superficial_Epithelial_upRRG	Superficial_Epithelial_openRRR
0.106347	inka1a	chr11-35080802-35083282	3.79765	7.30379e-05	Superficial_Epithelial	Superficial_Epithelial_upRRG	Superficial_Epithelial_openRRR
0.050836	trpm4b.2	chr12-4556788-4558057	1.9967	0.0229292	Superficial_Epithelial	Superficial_Epithelial_upRRG	Superficial_Epithelial_closeRRR
0.121677	exoc6	chr12-9093359-9094465	4.64377	1.71052e-06	Superficial_Epithelial	Superficial_Epithelial_upRRG	Superficial_Epithelial_openRRR
0.208584	adam8b	chr12-9093359-9094465	4.22565	1.19125e-05	Superficial_Epithelial	Superficial_Epithelial_upRRG	Superficial_Epithelial_openRRR
0.10418	itgb3b	chr12-26444996-26446165	2.72959	0.0031707	Superficial_Epithelial	Superficial_Epithelial_upRRG	Superficial_Epithelial_openRRR
0.0996868	etv4	chr12-27539659-27540892	4.55479	2.62195e-06	Superficial_Epithelial	Superficial_Epithelial_upRRG	Superficial_Epithelial_openRRR
0.0735416	etv4	chr12-27551120-27551969	3.06546	0.00108668	Superficial_Epithelial	Superficial_Epithelial_upRRG	Superficial_Epithelial_openRRR
0.0554163	etv4	chr12-27597206-27598917	2.10456	0.017665	Superficial_Epithelial	Superficial_Epithelial_upRRG	Superficial_Epithelial_openRRR
0.0504	tcf7l2	chr12-31031117-31032153	1.98077	0.0238087	Superficial_Epithelial	Superficial_Epithelial_upRRG	Superficial_Epithelial_openRRR
0.114036	timp2a	chr12-34032833-34033845	3.20617	0.000672564	Superficial_Epithelial	Superficial_Epithelial_upRRG	Superficial_Epithelial_openRRR
0.186059	gprc5c	chr12-35998662-35999530	5.06281	2.06564e-07	Superficial_Epithelial	Superficial_Epithelial_upRRG	Superficial_Epithelial_openRRR
0.0551659	hs3st3b1b	chr12-36921766-36922898	5.02449	2.52385e-07	Superficial_Epithelial	Superficial_Epithelial_upRRG	Superficial_Epithelial_openRRR
0.0642847	prkceb	chr13-8603037-8603445	2.67073	0.00378429	Superficial_Epithelial	Superficial_Epithelial_upRRG	Superficial_Epithelial_openRRR
0.0789251	ifit8	chr13-17694607-17696833	7.66854	8.69814e-15	Superficial_Epithelial	Superficial_Epithelial_upRRG	Superficial_Epithelial_closeRRR
0.0617263	ifit8	chr13-17741933-17742716	5.52289	1.66732e-08	Superficial_Epithelial	Superficial_Epithelial_upRRG	Superficial_Epithelial_openRRR
0.0656785	vdac2	chr13-17802565-17803765	3.75491	8.67028e-05	Superficial_Epithelial	Superficial_Epithelial_upRRG	Superficial_Epithelial_openRRR
0.150417	myofl	chr13-29239526-29241649	4.57124	2.42428e-06	Superficial_Epithelial	Superficial_Epithelial_upRRG	Superficial_Epithelial_openRRR
0.0941635	arg2	chr13-33039965-33041492	8.64131	2.77856e-18	Superficial_Epithelial	Superficial_Epithelial_downRRG	Superficial_Epithelial_closeRRR
0.103412	actn1	chr13-36342323-36343185	2.19815	0.0139691	Superficial_Epithelial	Superficial_Epithelial_upRRG	Superficial_Epithelial_openRRR
0.221594	actn1	chr13-36388751-36391872	6.67086	1.27152e-11	Superficial_Epithelial	Superficial_Epithelial_upRRG	Superficial_Epithelial_openRRR
0.163361	marcksl1a	chr13-46146027-46147342	4.71805	1.19057e-06	Superficial_Epithelial	Superficial_Epithelial_upRRG	Superficial_Epithelial_openRRR
0.219968	marcksl1a	chr13-46155295-46155929	9.61734	3.3779e-22	Superficial_Epithelial	Superficial_Epithelial_upRRG	Superficial_Epithelial_openRRR
0.138267	marcksl1a	chr13-46177134-46179760	4.52646	2.99902e-06	Superficial_Epithelial	Superficial_Epithelial_upRRG	Superficial_Epithelial_openRRR
0.0695298	bcl2l11	chr13-47305600-47306384	2.80537	0.00251293	Superficial_Epithelial	Superficial_Epithelial_upRRG	Superficial_Epithelial_openRRR
0.116272	bcl2l11	chr13-47351260-47353589	5.03047	2.44643e-07	Superficial_Epithelial	Superficial_Epithelial_upRRG	Superficial_Epithelial_openRRR
0.0986872	bcl2l11	chr13-47368961-47369793	4.13181	1.79958e-05	Superficial_Epithelial	Superficial_Epithelial_upRRG	Superficial_Epithelial_openRRR
0.0960703	bcl2l11	chr13-47383194-47384035	4.11616	1.92616e-05	Superficial_Epithelial	Superficial_Epithelial_upRRG	Superficial_Epithelial_openRRR
0.0767878	bcl2l11	chr13-47414002-47414763	3.60657	0.000155137	Superficial_Epithelial	Superficial_Epithelial_upRRG	Superficial_Epithelial_openRRR
0.0976625	bcl2l11	chr13-47431916-47432985	4.05968	2.45703e-05	Superficial_Epithelial	Superficial_Epithelial_upRRG	Superficial_Epithelial_openRRR
0.120788	cd74a	chr14-3052359-3055118	5.37051	3.92563e-08	Superficial_Epithelial	Superficial_Epithelial_upRRG	Superficial_Epithelial_openRRR
0.115062	abca1b	chr14-6469926-6471014	2.75352	0.00294789	Superficial_Epithelial	Superficial_Epithelial_upRRG	Superficial_Epithelial_openRRR
0.0814619	hbegfa	chr14-7115974-7117135	2.89741	0.0018813	Superficial_Epithelial	Superficial_Epithelial_upRRG	Superficial_Epithelial_openRRR
0.112881	egr1	chr14-21330819-21332399	9.7921	6.08685e-23	Superficial_Epithelial	Superficial_Epithelial_downRRG	Superficial_Epithelial_openRRR
0.0752427	cxcl14	chr14-24409815-24410975	2.55339	0.00533392	Superficial_Epithelial	Superficial_Epithelial_upRRG	Superficial_Epithelial_openRRR
0.0918247	cxcl14	chr14-24426309-24427869	3.45117	0.000279081	Superficial_Epithelial	Superficial_Epithelial_upRRG	Superficial_Epithelial_openRRR
0.088102	cxcl14	chr14-24436459-24437034	4.13232	1.79562e-05	Superficial_Epithelial	Superficial_Epithelial_upRRG	Superficial_Epithelial_openRRR
0.0926614	cxcl14	chr14-24438247-24439235	3.94229	4.03538e-05	Superficial_Epithelial	Superficial_Epithelial_upRRG	Superficial_Epithelial_openRRR
0.158466	fat2	chr14-26214328-26216456	2.18318	0.0145114	Superficial_Epithelial	Superficial_Epithelial_upRRG	Superficial_Epithelial_openRRR
0.0834061	mid2	chr14-28234071-28235321	3.80391	7.12158e-05	Superficial_Epithelial	Superficial_Epithelial_upRRG	Superficial_Epithelial_openRRR
0.0742073	LECT2	chr14-36889506-36890618	4.40467	5.29717e-06	Superficial_Epithelial	Superficial_Epithelial_upRRG	Superficial_Epithelial_openRRR
0.0590887	rarres3	chr14-45475185-45475910	4.80912	7.57981e-07	Superficial_Epithelial	Superficial_Epithelial_upRRG	Superficial_Epithelial_closeRRR
0.0553238	rarres3l	chr14-45475185-45475910	5.83692	2.6587e-09	Superficial_Epithelial	Superficial_Epithelial_upRRG	Superficial_Epithelial_closeRRR
0.0966488	calm3a.1	chr15-9255650-9257513	3.98799	3.3318e-05	Superficial_Epithelial	Superficial_Epithelial_upRRG	Superficial_Epithelial_openRRR
0.169903	plekhg2	chr15-20277992-20278938	2.98104	0.00143635	Superficial_Epithelial	Superficial_Epithelial_upRRG	Superficial_Epithelial_openRRR
0.243738	plekhg2	chr15-20280964-20282133	4.79445	8.15617e-07	Superficial_Epithelial	Superficial_Epithelial_upRRG	Superficial_Epithelial_openRRR
0.0796392	zgc:154093	chr15-23698574-23700156	1.77359	0.0380658	Superficial_Epithelial	Superficial_Epithelial_upRRG	Superficial_Epithelial_openRRR
0.0567201	taok1a	chr15-25610016-25611274	2.75401	0.00294352	Superficial_Epithelial	Superficial_Epithelial_upRRG	Superficial_Epithelial_openRRR
0.10544	myo1cb	chr15-28280082-28281728	2.78315	0.00269166	Superficial_Epithelial	Superficial_Epithelial_upRRG	Superficial_Epithelial_openRRR
0.105144	myo1cb	chr15-28288689-28289425	3.92986	4.24982e-05	Superficial_Epithelial	Superficial_Epithelial_upRRG	Superficial_Epithelial_openRRR
0.155609	fhdc4	chr15-32273031-32274749	6.27623	1.73442e-10	Superficial_Epithelial	Superficial_Epithelial_upRRG	Superficial_Epithelial_openRRR
0.105892	irs1	chr15-35910203-35911589	2.26542	0.0117436	Superficial_Epithelial	Superficial_Epithelial_upRRG	Superficial_Epithelial_openRRR
0.16636	irs1	chr15-35924360-35925675	3.46278	0.000267316	Superficial_Epithelial	Superficial_Epithelial_upRRG	Superficial_Epithelial_openRRR
0.0692531	prdm1a	chr16-7482297-7483301	4.72343	1.15947e-06	Superficial_Epithelial	Superficial_Epithelial_upRRG	Superficial_Epithelial_openRRR
0.0725423	triob	chr16-8866346-8867426	2.50819	0.00606764	Superficial_Epithelial	Superficial_Epithelial_upRRG	Superficial_Epithelial_openRRR
0.0587122	myh14	chr16-16868858-16869609	2.57564	0.00500273	Superficial_Epithelial	Superficial_Epithelial_upRRG	Superficial_Epithelial_openRRR
0.0662127	rpl18	chr16-16868858-16869609	2.73875	0.00308362	Superficial_Epithelial	Superficial_Epithelial_upRRG	Superficial_Epithelial_openRRR
0.107767	si:ch211-105c13.3	chr16-22613759-22614659	3.50609	0.000227371	Superficial_Epithelial	Superficial_Epithelial_upRRG	Superficial_Epithelial_openRRR
0.0870875	si:ch211-105c13.3	chr16-22618008-22619155	2.108	0.0175155	Superficial_Epithelial	Superficial_Epithelial_upRRG	Superficial_Epithelial_openRRR
0.0905806	si:ch211-105c13.3	chr16-22623275-22624317	2.63263	0.00423633	Superficial_Epithelial	Superficial_Epithelial_upRRG	Superficial_Epithelial_openRRR
0.137675	efna1b	chr16-23280664-23281398	6.27211	1.78089e-10	Superficial_Epithelial	Superficial_Epithelial_upRRG	Superficial_Epithelial_openRRR
-0.0610427	si:dkey-247k7.2	chr16-23280664-23281398	-2.39015	0.00842069	Superficial_Epithelial	Superficial_Epithelial_upRRG	Superficial_Epithelial_openRRR
0.0594095	bcl3	chr16-25708515-25709262	3.5839	0.000169249	Superficial_Epithelial	Superficial_Epithelial_upRRG	Superficial_Epithelial_openRRR
0.183613	fhl3a	chr16-33662367-33663543	2.414	0.00788921	Superficial_Epithelial	Superficial_Epithelial_upRRG	Superficial_Epithelial_openRRR
0.0549332	map7d1a	chr16-35709137-35710631	2.46755	0.00680205	Superficial_Epithelial	Superficial_Epithelial_upRRG	Superficial_Epithelial_openRRR
0.0728797	map7d1a	chr16-35714190-35714969	4.12819	1.82812e-05	Superficial_Epithelial	Superficial_Epithelial_upRRG	Superficial_Epithelial_openRRR
0.0527261	si:dkey-33i11.9	chr16-45266578-45267600	3.69214	0.000111187	Superficial_Epithelial	Superficial_Epithelial_upRRG	Superficial_Epithelial_openRRR
0.0747644	fxyd1	chr16-45266578-45267600	3.75094	8.8086e-05	Superficial_Epithelial	Superficial_Epithelial_upRRG	Superficial_Epithelial_openRRR
0.153992	rpz5	chr16-46481280-46482696	5.20894	9.49632e-08	Superficial_Epithelial	Superficial_Epithelial_upRRG	Superficial_Epithelial_openRRR
0.0921306	tmem176l.1	chr16-46481280-46482696	2.41515	0.00786439	Superficial_Epithelial	Superficial_Epithelial_upRRG	Superficial_Epithelial_openRRR
0.12552	zgc:173729	chr16-51336893-51337918	3.36039	0.000389157	Superficial_Epithelial	Superficial_Epithelial_upRRG	Superficial_Epithelial_openRRR
0.149071	serpinb1l4	chr16-51336893-51337918	3.48487	0.000246185	Superficial_Epithelial	Superficial_Epithelial_upRRG	Superficial_Epithelial_openRRR
0.0891072	si:ch211-107n13.1	chr16-51336893-51337918	1.87484	0.0304074	Superficial_Epithelial	Superficial_Epithelial_upRRG	Superficial_Epithelial_openRRR
0.0523222	psma3	chr17-11404067-11405002	3.24779	0.000581515	Superficial_Epithelial	Superficial_Epithelial_upRRG	Superficial_Epithelial_openRRR
0.0978103	foxn3	chr17-16663430-16664371	4.59157	2.19958e-06	Superficial_Epithelial	Superficial_Epithelial_upRRG	Superficial_Epithelial_openRRR
0.057451	fas	chr17-23567687-23568796	3.76429	8.35108e-05	Superficial_Epithelial	Superficial_Epithelial_upRRG	Superficial_Epithelial_openRRR
0.0629339	fas	chr17-23602779-23603674	4.49244	3.52057e-06	Superficial_Epithelial	Superficial_Epithelial_upRRG	Superficial_Epithelial_closeRRR
0.0855802	asap3	chr17-27228852-27230078	2.71459	0.00331785	Superficial_Epithelial	Superficial_Epithelial_upRRG	Superficial_Epithelial_openRRR
0.0653235	hectd1	chr17-28597435-28598616	3.25246	0.000572055	Superficial_Epithelial	Superficial_Epithelial_upRRG	Superficial_Epithelial_openRRR
0.0506564	hectd1	chr17-28674427-28675308	3.0094	0.0013088	Superficial_Epithelial	Superficial_Epithelial_upRRG	Superficial_Epithelial_openRRR
0.124935	rsad2	chr17-35362554-35363634	10.0466	4.75254e-24	Superficial_Epithelial	Superficial_Epithelial_upRRG	Superficial_Epithelial_closeRRR
0.0553081	ezra	chr17-45484948-45485975	1.82049	0.0343421	Superficial_Epithelial	Superficial_Epithelial_upRRG	Superficial_Epithelial_openRRR
0.101276	parp12a	chr18-12859467-12860030	8.42539	1.79775e-17	Superficial_Epithelial	Superficial_Epithelial_upRRG	Superficial_Epithelial_closeRRR
0.152316	btbd11b	chr18-15030955-15032243	7.42625	5.58593e-14	Superficial_Epithelial	Superficial_Epithelial_upRRG	Superficial_Epithelial_openRRR
0.153142	arntl2	chr18-15572980-15574029	5.20101	9.91021e-08	Superficial_Epithelial	Superficial_Epithelial_upRRG	Superficial_Epithelial_openRRR
0.0672356	siah1	chr18-18431425-18432366	3.00227	0.00133986	Superficial_Epithelial	Superficial_Epithelial_upRRG	Superficial_Epithelial_openRRR
0.185293	igf1ra	chr18-21020151-21021211	3.48059	0.000250155	Superficial_Epithelial	Superficial_Epithelial_upRRG	Superficial_Epithelial_openRRR
0.0666213	cbfb	chr18-23023942-23025240	2.60691	0.00456812	Superficial_Epithelial	Superficial_Epithelial_upRRG	Superficial_Epithelial_openRRR
0.058408	cbfb	chr18-23038032-23039041	2.2388	0.0125846	Superficial_Epithelial	Superficial_Epithelial_upRRG	Superficial_Epithelial_openRRR
0.173153	sema4ba	chr18-25869959-25870795	2.8138	0.00244799	Superficial_Epithelial	Superficial_Epithelial_upRRG	Superficial_Epithelial_openRRR
0.172454	sema4ba	chr18-25904630-25905994	3.21227	0.000658454	Superficial_Epithelial	Superficial_Epithelial_upRRG	Superficial_Epithelial_openRRR
0.0908423	ppp1r13l	chr18-35766830-35768011	3.17779	0.000742013	Superficial_Epithelial	Superficial_Epithelial_upRRG	Superficial_Epithelial_openRRR
0.0976421	ppp1r13l	chr18-35769592-35770446	4.07183	2.33231e-05	Superficial_Epithelial	Superficial_Epithelial_upRRG	Superficial_Epithelial_openRRR
0.0716582	bcl9l	chr18-43957794-43959031	3.96614	3.6523e-05	Superficial_Epithelial	Superficial_Epithelial_downRRG	Superficial_Epithelial_openRRR
0.0747439	aplp2	chr18-44507450-44508333	2.90259	0.00185045	Superficial_Epithelial	Superficial_Epithelial_upRRG	Superficial_Epithelial_openRRR
0.0525358	st14a	chr18-44507450-44508333	2.92254	0.00173593	Superficial_Epithelial	Superficial_Epithelial_upRRG	Superficial_Epithelial_openRRR
0.0564374	kifc3	chr18-45535484-45536433	2.2621	0.0118456	Superficial_Epithelial	Superficial_Epithelial_upRRG	Superficial_Epithelial_openRRR
-0.0528921	mcl1a	chr19-383878-384626	-3.57157	0.000177423	Superficial_Epithelial	Superficial_Epithelial_downRRG	Superficial_Epithelial_openRRR
0.123689	rplp1	chr19-1801044-1802077	3.33068	0.000433173	Superficial_Epithelial	Superficial_Epithelial_upRRG	Superficial_Epithelial_openRRR
0.0887877	ndrg1a	chr19-34979239-34980238	2.35612	0.00923356	Superficial_Epithelial	Superficial_Epithelial_upRRG	Superficial_Epithelial_openRRR
0.072642	ext1b	chr19-46474128-46475499	2.20051	0.0138854	Superficial_Epithelial	Superficial_Epithelial_upRRG	Superficial_Epithelial_openRRR
0.0518309	hif1ab	chr20-20358534-20360877	2.94086	0.00163649	Superficial_Epithelial	Superficial_Epithelial_upRRG	Superficial_Epithelial_openRRR
0.142404	lnx1	chr20-22577367-22578705	3.51794	0.000217458	Superficial_Epithelial	Superficial_Epithelial_upRRG	Superficial_Epithelial_openRRR
0.18853	palld	chr20-23576929-23578134	4.13869	1.7465e-05	Superficial_Epithelial	Superficial_Epithelial_upRRG	Superficial_Epithelial_openRRR
0.10074	sh3rf1	chr20-23768231-23769898	3.04414	0.00116673	Superficial_Epithelial	Superficial_Epithelial_upRRG	Superficial_Epithelial_openRRR
0.0959567	sh3rf1	chr20-23808044-23809321	2.09518	0.0180775	Superficial_Epithelial	Superficial_Epithelial_upRRG	Superficial_Epithelial_openRRR
0.068889	ginm1	chr20-23808044-23809321	3.2079	0.000668533	Superficial_Epithelial	Superficial_Epithelial_upRRG	Superficial_Epithelial_openRRR
0.0667739	bach2b	chr20-24060130-24060627	2.13797	0.0162597	Superficial_Epithelial	Superficial_Epithelial_upRRG	Superficial_Epithelial_openRRR
0.0900097	bach2b	chr20-24084750-24085600	1.8406	0.0328399	Superficial_Epithelial	Superficial_Epithelial_upRRG	Superficial_Epithelial_openRRR
0.0761422	bach2b	chr20-24091332-24093234	1.81465	0.0347889	Superficial_Epithelial	Superficial_Epithelial_upRRG	Superficial_Epithelial_openRRR
0.107034	bach2b	chr20-24112798-24113581	3.57921	0.000172318	Superficial_Epithelial	Superficial_Epithelial_upRRG	Superficial_Epithelial_openRRR
0.191717	epha7	chr20-24882440-24883274	4.19974	1.33609e-05	Superficial_Epithelial	Superficial_Epithelial_upRRG	Superficial_Epithelial_openRRR
0.077913	sipa1l1	chr20-28706041-28706629	4.73645	1.08745e-06	Superficial_Epithelial	Superficial_Epithelial_upRRG	Superficial_Epithelial_openRRR
-0.0722379	si:dkey-30j22.1	chr20-35802637-35804079	-3.12782	0.000880527	Superficial_Epithelial	Superficial_Epithelial_upRRG	Superficial_Epithelial_openRRR
0.0704475	tnfrsf21	chr20-35802637-35804079	2.14341	0.01604	Superficial_Epithelial	Superficial_Epithelial_upRRG	Superficial_Epithelial_openRRR
0.0530672	enah	chr20-36566104-36566777	2.29737	0.010799	Superficial_Epithelial	Superficial_Epithelial_upRRG	Superficial_Epithelial_openRRR
0.139586	hivep2a	chr20-37719020-37720150	3.22152	0.000637569	Superficial_Epithelial	Superficial_Epithelial_upRRG	Superficial_Epithelial_openRRR
-0.0636207	atf3	chr20-37719020-37720150	-3.09413	0.000986946	Superficial_Epithelial	Superficial_Epithelial_downRRG	Superficial_Epithelial_openRRR
-0.0510896	atf3	chr20-37868502-37869456	-1.96283	0.0248327	Superficial_Epithelial	Superficial_Epithelial_downRRG	Superficial_Epithelial_openRRR
0.166319	cep85l	chr20-41814537-41815420	4.59325	2.18202e-06	Superficial_Epithelial	Superficial_Epithelial_upRRG	Superficial_Epithelial_openRRR
0.145033	cep85l	chr20-41875873-41877110	3.72136	9.90769e-05	Superficial_Epithelial	Superficial_Epithelial_upRRG	Superficial_Epithelial_openRRR
0.14817	cep85l	chr20-41904442-41905324	3.91864	4.45244e-05	Superficial_Epithelial	Superficial_Epithelial_upRRG	Superficial_Epithelial_openRRR
0.0665772	scamp1	chr21-3760317-3761652	3.89179	4.97545e-05	Superficial_Epithelial	Superficial_Epithelial_upRRG	Superficial_Epithelial_openRRR
0.113927	ly6m2	chr21-5458992-5461476	5.5706	1.26928e-08	Superficial_Epithelial	Superficial_Epithelial_upRRG	Superficial_Epithelial_openRRR
0.0537264	ell2	chr21-11746994-11747641	3.46608	0.000264055	Superficial_Epithelial	Superficial_Epithelial_upRRG	Superficial_Epithelial_openRRR
0.0515496	glrx	chr21-11746994-11747641	3.16772	0.0007682	Superficial_Epithelial	Superficial_Epithelial_upRRG	Superficial_Epithelial_openRRR
0.118325	gsna	chr21-17601891-17603808	3.53271	0.000205665	Superficial_Epithelial	Superficial_Epithelial_upRRG	Superficial_Epithelial_openRRR
0.171875	rai14	chr21-19547570-19549996	4.41204	5.12008e-06	Superficial_Epithelial	Superficial_Epithelial_upRRG	Superficial_Epithelial_openRRR
0.0709895	eif4ebp1	chr21-21017242-21018572	4.28561	9.1118e-06	Superficial_Epithelial	Superficial_Epithelial_upRRG	Superficial_Epithelial_openRRR
0.201581	lifrb	chr21-21232093-21233533	4.24636	1.08634e-05	Superficial_Epithelial	Superficial_Epithelial_upRRG	Superficial_Epithelial_openRRR
0.126754	gig2l	chr21-22687995-22690823	6.81317	4.77347e-12	Superficial_Epithelial	Superficial_Epithelial_upRRG	Superficial_Epithelial_closeRRR
0.0585749	gig2h	chr21-22687995-22690823	3.54134	0.000199054	Superficial_Epithelial	Superficial_Epithelial_upRRG	Superficial_Epithelial_closeRRR
0.0757304	gig2e	chr21-22687995-22690823	5.33256	4.84194e-08	Superficial_Epithelial	Superficial_Epithelial_upRRG	Superficial_Epithelial_closeRRR
0.0793757	gig2d	chr21-22687995-22690823	4.96048	3.51591e-07	Superficial_Epithelial	Superficial_Epithelial_upRRG	Superficial_Epithelial_closeRRR
0.0528304	prdx5	chr21-26752125-26753219	3.38231	0.000359393	Superficial_Epithelial	Superficial_Epithelial_upRRG	Superficial_Epithelial_openRRR
0.0516353	calm3b	chr21-26752125-26753219	3.62097	0.000146751	Superficial_Epithelial	Superficial_Epithelial_upRRG	Superficial_Epithelial_openRRR
0.0697047	ogna	chr22-10504958-10506440	2.78291	0.00269371	Superficial_Epithelial	Superficial_Epithelial_upRRG	Superficial_Epithelial_openRRR
0.0688745	ecm2	chr22-10504958-10506440	2.57848	0.00496179	Superficial_Epithelial	Superficial_Epithelial_upRRG	Superficial_Epithelial_openRRR
0.0632141	si:dkey-42i9.6	chr22-10563517-10564513	2.50518	0.00611939	Superficial_Epithelial	Superficial_Epithelial_upRRG	Superficial_Epithelial_openRRR
0.0894673	insrb	chr22-10963525-10964428	2.48391	0.0064975	Superficial_Epithelial	Superficial_Epithelial_upRRG	Superficial_Epithelial_openRRR
0.0623723	slc30a7	chr22-16144585-16145212	5.45768	2.41197e-08	Superficial_Epithelial	Superficial_Epithelial_upRRG	Superficial_Epithelial_openRRR
0.0727166	krt8	chr23-10322200-10323170	3.50829	0.0002255	Superficial_Epithelial	Superficial_Epithelial_upRRG	Superficial_Epithelial_openRRR
0.119719	krt8	chr23-10347536-10348891	8.05578	3.94868e-16	Superficial_Epithelial	Superficial_Epithelial_upRRG	Superficial_Epithelial_openRRR
0.11959	chl1a	chr23-11352935-11354404	5.9964	1.00873e-09	Superficial_Epithelial	Superficial_Epithelial_upRRG	Superficial_Epithelial_openRRR
0.102327	zgc:114174	chr23-16863831-16864833	12.4379	8.13318e-36	Superficial_Epithelial	Superficial_Epithelial_downRRG	Superficial_Epithelial_closeRRR
0.0575322	si:dkey-147f3.8	chr23-16863831-16864833	6.50797	3.8086e-11	Superficial_Epithelial	Superficial_Epithelial_downRRG	Superficial_Epithelial_closeRRR
0.0508585	rpl10	chr23-19768723-19770714	2.7897	0.00263788	Superficial_Epithelial	Superficial_Epithelial_upRRG	Superficial_Epithelial_openRRR
0.122042	flna	chr23-19768723-19770714	2.45496	0.00704507	Superficial_Epithelial	Superficial_Epithelial_upRRG	Superficial_Epithelial_openRRR
0.0984388	phc2a	chr23-22115639-22116548	5.20473	9.71386e-08	Superficial_Epithelial	Superficial_Epithelial_upRRG	Superficial_Epithelial_openRRR
0.0664141	her9	chr23-23388689-23390117	2.40694	0.00804339	Superficial_Epithelial	Superficial_Epithelial_upRRG	Superficial_Epithelial_openRRR
0.139701	agrn	chr23-23388689-23390117	2.62368	0.0043493	Superficial_Epithelial	Superficial_Epithelial_upRRG	Superficial_Epithelial_openRRR
0.0651129	nckap5l	chr23-24645849-24646358	6.03839	7.78311e-10	Superficial_Epithelial	Superficial_Epithelial_upRRG	Superficial_Epithelial_openRRR
0.061221	sdf4	chr23-24645849-24646358	4.9133	4.47779e-07	Superficial_Epithelial	Superficial_Epithelial_upRRG	Superficial_Epithelial_openRRR
0.214177	lrp1ab	chr23-25669716-25671201	4.76806	9.30054e-07	Superficial_Epithelial	Superficial_Epithelial_upRRG	Superficial_Epithelial_openRRR
0.0588729	dip2ba	chr23-27382808-27383858	1.98622	0.0235045	Superficial_Epithelial	Superficial_Epithelial_upRRG	Superficial_Epithelial_openRRR
0.0793138	dip2ba	chr23-27478946-27480472	3.54377	0.000197224	Superficial_Epithelial	Superficial_Epithelial_upRRG	Superficial_Epithelial_openRRR
0.0991659	tnfrsf9a	chr23-30012438-30013433	2.64513	0.00408295	Superficial_Epithelial	Superficial_Epithelial_upRRG	Superficial_Epithelial_openRRR
0.126979	myb	chr23-31893133-31894557	3.73589	9.35244e-05	Superficial_Epithelial	Superficial_Epithelial_upRRG	Superficial_Epithelial_openRRR
0.118534	plekhg5b	chr23-37616947-37618207	2.85715	0.00213735	Superficial_Epithelial	Superficial_Epithelial_upRRG	Superficial_Epithelial_openRRR
0.0909809	plekhg5b	chr23-37640516-37641483	1.92862	0.0268888	Superficial_Epithelial	Superficial_Epithelial_upRRG	Superficial_Epithelial_openRRR
0.138411	reps2	chr23-40912755-40913483	7.21706	2.65608e-13	Superficial_Epithelial	Superficial_Epithelial_upRRG	Superficial_Epithelial_openRRR
0.0808729	dipk2ab	chr24-5682822-5684254	2.40387	0.00811134	Superficial_Epithelial	Superficial_Epithelial_upRRG	Superficial_Epithelial_openRRR
0.0653521	rps6ka3b	chr24-24245117-24246091	4.04366	2.63118e-05	Superficial_Epithelial	Superficial_Epithelial_upRRG	Superficial_Epithelial_openRRR
0.0564231	fndc3bb	chr24-26860361-26861776	2.79088	0.00262826	Superficial_Epithelial	Superficial_Epithelial_upRRG	Superficial_Epithelial_openRRR
0.06351	cnn3a	chr24-31206205-31206943	4.48166	3.70323e-06	Superficial_Epithelial	Superficial_Epithelial_upRRG	Superficial_Epithelial_openRRR
0.0774128	f3a	chr24-31206205-31206943	2.33252	0.00983673	Superficial_Epithelial	Superficial_Epithelial_upRRG	Superficial_Epithelial_openRRR
0.160541	ptprz1a	chr25-28408965-28410120	4.43277	4.65156e-06	Superficial_Epithelial	Superficial_Epithelial_upRRG	Superficial_Epithelial_openRRR
0.0540987	mbnl2	chr1-2051545-2052275	2.96715	0.00150287	Intermediate_Epithelial	Intermediate_Epithelial_downRRG	Intermediate_Epithelial_openRRR
0.20832	fn1b	chr1-5502038-5504000	6.56739	2.56019e-11	Intermediate_Epithelial	Intermediate_Epithelial_upRRG	Intermediate_Epithelial_openRRR
0.183769	fn1b	chr1-5542412-5543279	5.24111	7.98059e-08	Intermediate_Epithelial	Intermediate_Epithelial_upRRG	Intermediate_Epithelial_openRRR
0.088217	fn1b	chr1-5555832-5557385	3.40559	0.000330109	Intermediate_Epithelial	Intermediate_Epithelial_upRRG	Intermediate_Epithelial_openRRR
0.0953792	klf3	chr1-18652435-18653215	4.36909	6.23836e-06	Intermediate_Epithelial	Intermediate_Epithelial_downRRG	Intermediate_Epithelial_openRRR
0.062123	klf3	chr1-18697202-18698104	2.33133	0.00986802	Intermediate_Epithelial	Intermediate_Epithelial_downRRG	Intermediate_Epithelial_closeRRR
0.0579381	rnf38	chr1-18888100-18889096	2.02178	0.0215993	Intermediate_Epithelial	Intermediate_Epithelial_downRRG	Intermediate_Epithelial_openRRR
0.0528483	raph1b	chr1-29682073-29682913	4.214	1.25445e-05	Intermediate_Epithelial	Intermediate_Epithelial_upRRG	Intermediate_Epithelial_openRRR
0.0963458	kcnq5b	chr1-31345086-31345814	5.09131	1.77797e-07	Intermediate_Epithelial	Intermediate_Epithelial_downRRG	Intermediate_Epithelial_closeRRR
0.101043	FO834828.1	chr1-40682315-40683653	3.56917	0.000179055	Intermediate_Epithelial	Intermediate_Epithelial_downRRG	Intermediate_Epithelial_closeRRR
0.118773	FO834828.2	chr1-40682315-40683653	5.23929	8.05994e-08	Intermediate_Epithelial	Intermediate_Epithelial_downRRG	Intermediate_Epithelial_closeRRR
0.15531	FO681323.1	chr1-40682315-40683653	4.32146	7.74987e-06	Intermediate_Epithelial	Intermediate_Epithelial_downRRG	Intermediate_Epithelial_closeRRR
0.113718	CABZ01072532.1	chr1-40682315-40683653	4.04841	2.57833e-05	Intermediate_Epithelial	Intermediate_Epithelial_downRRG	Intermediate_Epithelial_closeRRR
0.0892077	si:dkey-56e3.2	chr1-41543319-41544522	3.40209	0.000334361	Intermediate_Epithelial	Intermediate_Epithelial_downRRG	Intermediate_Epithelial_closeRRR
0.056742	si:dkey-56e3.2	chr1-41563603-41564305	2.09316	0.0181674	Intermediate_Epithelial	Intermediate_Epithelial_downRRG	Intermediate_Epithelial_closeRRR
0.323916	zgc:111983	chr1-45171642-45173427	10.1751	1.28022e-24	Intermediate_Epithelial	Intermediate_Epithelial_downRRG	Intermediate_Epithelial_openRRR
0.0619019	prdx2	chr1-51781178-51782171	6.02751	8.32513e-10	Intermediate_Epithelial	Intermediate_Epithelial_upRRG	Intermediate_Epithelial_openRRR
0.0776869	nfixa	chr1-51895421-51896406	2.53123	0.00568312	Intermediate_Epithelial	Intermediate_Epithelial_downRRG	Intermediate_Epithelial_closeRRR
0.070991	si:ch211-217k17.9	chr1-52390833-52392524	5.58173	1.19068e-08	Intermediate_Epithelial	Intermediate_Epithelial_downRRG	Intermediate_Epithelial_closeRRR
0.0505793	si:ch211-217k17.10	chr1-52390833-52392524	5.17185	1.15895e-07	Intermediate_Epithelial	Intermediate_Epithelial_downRRG	Intermediate_Epithelial_closeRRR
-0.0900096	abca1a	chr1-52488424-52489338	-4.59793	2.13358e-06	Intermediate_Epithelial	Intermediate_Epithelial_upRRG	Intermediate_Epithelial_openRRR
0.0545966	wnt9a	chr2-3198423-3198942	6.03147	8.12356e-10	Intermediate_Epithelial	Intermediate_Epithelial_downRRG	Intermediate_Epithelial_closeRRR
0.0524038	crfb16	chr2-5526552-5527600	2.45011	0.00714071	Intermediate_Epithelial	Intermediate_Epithelial_downRRG	Intermediate_Epithelial_openRRR
0.0681244	amotl2b	chr2-22864519-22865749	4.34159	7.07263e-06	Intermediate_Epithelial	Intermediate_Epithelial_downRRG	Intermediate_Epithelial_closeRRR
0.0724457	rasal2	chr2-35771232-35771977	4.20043	1.33206e-05	Intermediate_Epithelial	Intermediate_Epithelial_downRRG	Intermediate_Epithelial_closeRRR
0.0519244	keap1a	chr2-41760535-41761662	3.65696	0.000127611	Intermediate_Epithelial	Intermediate_Epithelial_upRRG	Intermediate_Epithelial_openRRR
0.0666582	keap1a	chr2-41828303-41829647	5.86816	2.2033e-09	Intermediate_Epithelial	Intermediate_Epithelial_upRRG	Intermediate_Epithelial_openRRR
0.0715712	adcy8	chr2-42829828-42831549	6.44997	5.59379e-11	Intermediate_Epithelial	Intermediate_Epithelial_upRRG	Intermediate_Epithelial_openRRR
0.0640646	efr3a	chr2-42829828-42831549	3.83963	6.16089e-05	Intermediate_Epithelial	Intermediate_Epithelial_upRRG	Intermediate_Epithelial_openRRR
0.0974522	zgc:152670	chr2-44346114-44347453	8.29117	5.60677e-17	Intermediate_Epithelial	Intermediate_Epithelial_downRRG	Intermediate_Epithelial_closeRRR
0.0963081	gpc1b	chr2-46081911-46082580	5.41755	3.02106e-08	Intermediate_Epithelial	Intermediate_Epithelial_upRRG	Intermediate_Epithelial_openRRR
0.105563	gpc1b	chr2-46095526-46096829	4.54901	2.69495e-06	Intermediate_Epithelial	Intermediate_Epithelial_upRRG	Intermediate_Epithelial_openRRR
0.0708514	rorcb	chr2-49424817-49425522	5.58443	1.17236e-08	Intermediate_Epithelial	Intermediate_Epithelial_downRRG	Intermediate_Epithelial_closeRRR
0.0815072	cygb1	chr3-6675098-6676338	3.7842	7.71011e-05	Intermediate_Epithelial	Intermediate_Epithelial_upRRG	Intermediate_Epithelial_openRRR
0.0505239	CABZ01087224.1	chr3-11553943-11554483	4.93915	3.92315e-07	Intermediate_Epithelial	Intermediate_Epithelial_downRRG	Intermediate_Epithelial_closeRRR
0.0664133	jpt2	chr3-15900212-15902277	5.85982	2.31691e-09	Intermediate_Epithelial	Intermediate_Epithelial_upRRG	Intermediate_Epithelial_openRRR
0.124246	stk17al	chr3-16838718-16839647	4.54094	2.80021e-06	Intermediate_Epithelial	Intermediate_Epithelial_downRRG	Intermediate_Epithelial_closeRRR
0.0620083	fam171a2a	chr3-21285231-21286360	2.2485	0.0122722	Intermediate_Epithelial	Intermediate_Epithelial_upRRG	Intermediate_Epithelial_openRRR
0.152733	fam171a2a	chr3-21340297-21341879	6.92235	2.22098e-12	Intermediate_Epithelial	Intermediate_Epithelial_upRRG	Intermediate_Epithelial_openRRR
0.0570261	copz2	chr3-24111262-24112042	3.95198	3.87539e-05	Intermediate_Epithelial	Intermediate_Epithelial_downRRG	Intermediate_Epithelial_openRRR
0.0992158	usp43b	chr3-25606204-25606988	7.47873	3.75221e-14	Intermediate_Epithelial	Intermediate_Epithelial_upRRG	Intermediate_Epithelial_openRRR
0.126634	si:ch211-157c3.4	chr3-27682107-27682639	11.8979	6.0713e-33	Intermediate_Epithelial	Intermediate_Epithelial_downRRG	Intermediate_Epithelial_openRRR
0.122721	si:ch211-157c3.4	chr3-27691676-27692790	4.21238	1.26345e-05	Intermediate_Epithelial	Intermediate_Epithelial_downRRG	Intermediate_Epithelial_openRRR
0.0806509	apnl	chr3-31294250-31295858	5.5492	1.43486e-08	Intermediate_Epithelial	Intermediate_Epithelial_downRRG	Intermediate_Epithelial_closeRRR
0.0699445	LO017965.1	chr3-31294250-31295858	5.4653	2.31062e-08	Intermediate_Epithelial	Intermediate_Epithelial_downRRG	Intermediate_Epithelial_closeRRR
0.0595648	csnk1da	chr3-36180632-36181493	2.82353	0.00237492	Intermediate_Epithelial	Intermediate_Epithelial_downRRG	Intermediate_Epithelial_closeRRR
0.198705	ppl	chr3-36487704-36488949	7.22164	2.5683e-13	Intermediate_Epithelial	Intermediate_Epithelial_downRRG	Intermediate_Epithelial_openRRR
0.0693447	PLEKHH3	chr3-36887711-36888800	3.71449	0.000101809	Intermediate_Epithelial	Intermediate_Epithelial_downRRG	Intermediate_Epithelial_closeRRR
0.0564746	card11	chr3-41608065-41609375	6.00287	9.69315e-10	Intermediate_Epithelial	Intermediate_Epithelial_upRRG	Intermediate_Epithelial_openRRR
0.0530499	mrtfbb	chr3-46289245-46290601	2.78426	0.00268247	Intermediate_Epithelial	Intermediate_Epithelial_downRRG	Intermediate_Epithelial_closeRRR
0.0637372	mrtfbb	chr3-46296891-46297983	3.17378	0.000752343	Intermediate_Epithelial	Intermediate_Epithelial_downRRG	Intermediate_Epithelial_closeRRR
0.135045	ppap2d	chr3-47262031-47263641	8.10435	2.65131e-16	Intermediate_Epithelial	Intermediate_Epithelial_upRRG	Intermediate_Epithelial_openRRR
0.085208	metrnla	chr3-48541647-48542450	4.89655	4.87681e-07	Intermediate_Epithelial	Intermediate_Epithelial_upRRG	Intermediate_Epithelial_openRRR
0.0741813	crb3a	chr3-49619608-49620923	2.67121	0.00377895	Intermediate_Epithelial	Intermediate_Epithelial_downRRG	Intermediate_Epithelial_closeRRR
0.0578756	timp2b	chr3-57697153-57698188	6.17709	3.2647e-10	Intermediate_Epithelial	Intermediate_Epithelial_upRRG	Intermediate_Epithelial_openRRR
0.0774365	lgals3bpa	chr3-57708415-57709620	4.51163	3.21651e-06	Intermediate_Epithelial	Intermediate_Epithelial_upRRG	Intermediate_Epithelial_openRRR
0.0680738	slc38a2	chr4-1559762-1560482	4.31701	7.90792e-06	Intermediate_Epithelial	Intermediate_Epithelial_downRRG	Intermediate_Epithelial_openRRR
0.0595746	plekha5	chr4-3201843-3202808	3.81639	6.77086e-05	Intermediate_Epithelial	Intermediate_Epithelial_upRRG	Intermediate_Epithelial_openRRR
0.0984473	sema3aa	chr4-11285804-11287501	8.74096	1.1557e-18	Intermediate_Epithelial	Intermediate_Epithelial_downRRG	Intermediate_Epithelial_openRRR
0.0638395	sema3aa	chr4-11308880-11309928	4.04545	2.61118e-05	Intermediate_Epithelial	Intermediate_Epithelial_downRRG	Intermediate_Epithelial_closeRRR
0.0602031	b2m	chr4-12838451-12839624	3.02851	0.0012288	Intermediate_Epithelial	Intermediate_Epithelial_upRRG	Intermediate_Epithelial_openRRR
0.0508059	b2m	chr4-12859950-12860771	2.42446	0.00766563	Intermediate_Epithelial	Intermediate_Epithelial_upRRG	Intermediate_Epithelial_openRRR
0.0728596	ube2h	chr4-15044067-15044811	6.71166	9.62116e-12	Intermediate_Epithelial	Intermediate_Epithelial_upRRG	Intermediate_Epithelial_openRRR
0.0661726	plxna4	chr4-15346616-15347800	3.17329	0.000753603	Intermediate_Epithelial	Intermediate_Epithelial_downRRG	Intermediate_Epithelial_openRRR
0.0661325	pawr	chr4-21504056-21505245	4.03709	2.70586e-05	Intermediate_Epithelial	Intermediate_Epithelial_upRRG	Intermediate_Epithelial_openRRR
0.063241	ppp1r12a	chr4-21595018-21595873	5.18446	1.08324e-07	Intermediate_Epithelial	Intermediate_Epithelial_upRRG	Intermediate_Epithelial_openRRR
0.0678301	pfkfb3	chr4-25560387-25561185	4.13719	1.75794e-05	Intermediate_Epithelial	Intermediate_Epithelial_downRRG	Intermediate_Epithelial_openRRR
0.0630037	PPP1CA	chr5-1628434-1629118	3.85106	5.88028e-05	Intermediate_Epithelial	Intermediate_Epithelial_downRRG	Intermediate_Epithelial_closeRRR
0.0795507	mcc	chr5-1763474-1764888	9.28864	7.8137e-21	Intermediate_Epithelial	Intermediate_Epithelial_upRRG	Intermediate_Epithelial_openRRR
0.117978	angptl2a	chr5-4796847-4797646	6.10042	5.28948e-10	Intermediate_Epithelial	Intermediate_Epithelial_upRRG	Intermediate_Epithelial_openRRR
0.0873185	angptl2a	chr5-4818354-4819223	3.85118	5.87755e-05	Intermediate_Epithelial	Intermediate_Epithelial_upRRG	Intermediate_Epithelial_openRRR
0.0535823	taok3a	chr5-15455728-15456673	4.9697	3.3529e-07	Intermediate_Epithelial	Intermediate_Epithelial_downRRG	Intermediate_Epithelial_closeRRR
0.0814411	xbp1	chr5-15942313-15943256	3.27313	0.00053182	Intermediate_Epithelial	Intermediate_Epithelial_downRRG	Intermediate_Epithelial_openRRR
0.0892486	kremen1	chr5-16275188-16276271	5.95734	1.28187e-09	Intermediate_Epithelial	Intermediate_Epithelial_upRRG	Intermediate_Epithelial_openRRR
0.0586318	npas2	chr5-22716377-22717294	4.01343	2.99211e-05	Intermediate_Epithelial	Intermediate_Epithelial_downRRG	Intermediate_Epithelial_closeRRR
0.0965457	niban2b	chr5-28962949-28963907	5.83997	2.61051e-09	Intermediate_Epithelial	Intermediate_Epithelial_downRRG	Intermediate_Epithelial_closeRRR
0.0502634	aif1l	chr5-34556157-34556793	4.95163	3.67976e-07	Intermediate_Epithelial	Intermediate_Epithelial_upRRG	Intermediate_Epithelial_openRRR
0.0665673	ar	chr5-35523948-35525181	2.82339	0.00237591	Intermediate_Epithelial	Intermediate_Epithelial_downRRG	Intermediate_Epithelial_closeRRR
0.075301	pdzd2	chr5-41030513-41031139	5.51021	1.79201e-08	Intermediate_Epithelial	Intermediate_Epithelial_upRRG	Intermediate_Epithelial_openRRR
0.0564359	pdzd2	chr5-41135931-41137093	2.58541	0.00486316	Intermediate_Epithelial	Intermediate_Epithelial_upRRG	Intermediate_Epithelial_openRRR
0.102342	rhobtb4	chr5-43439675-43440940	4.59603	2.15313e-06	Intermediate_Epithelial	Intermediate_Epithelial_downRRG	Intermediate_Epithelial_closeRRR
0.0989177	nos2a	chr5-43773038-43773948	5.68272	6.62856e-09	Intermediate_Epithelial	Intermediate_Epithelial_downRRG	Intermediate_Epithelial_openRRR
0.0946735	nos2a	chr5-43781562-43782393	5.66623	7.29849e-09	Intermediate_Epithelial	Intermediate_Epithelial_downRRG	Intermediate_Epithelial_openRRR
0.0828727	vcana	chr5-46324294-46325107	5.69134	6.30244e-09	Intermediate_Epithelial	Intermediate_Epithelial_upRRG	Intermediate_Epithelial_openRRR
0.111073	hmgcra	chr5-50971542-50972223	8.00318	6.06248e-16	Intermediate_Epithelial	Intermediate_Epithelial_downRRG	Intermediate_Epithelial_openRRR
0.114259	mamdc2a	chr5-52568132-52569706	7.76589	4.05369e-15	Intermediate_Epithelial	Intermediate_Epithelial_upRRG	Intermediate_Epithelial_openRRR
0.138437	scarb2a	chr5-52844351-52846009	8.33604	3.841e-17	Intermediate_Epithelial	Intermediate_Epithelial_downRRG	Intermediate_Epithelial_closeRRR
0.121929	gna14	chr5-55560603-55561649	4.66385	1.55174e-06	Intermediate_Epithelial	Intermediate_Epithelial_downRRG	Intermediate_Epithelial_openRRR
0.064449	slc37a2	chr5-58456199-58457014	5.59997	1.07195e-08	Intermediate_Epithelial	Intermediate_Epithelial_downRRG	Intermediate_Epithelial_closeRRR
0.0588262	upk3b	chr5-59164246-59165715	2.67272	0.00376194	Intermediate_Epithelial	Intermediate_Epithelial_downRRG	Intermediate_Epithelial_closeRRR
0.288793	specc1	chr5-62979162-62980553	11.1823	2.48775e-29	Intermediate_Epithelial	Intermediate_Epithelial_downRRG	Intermediate_Epithelial_closeRRR
0.077557	mat2ab	chr5-69190523-69191247	6.48284	4.50074e-11	Intermediate_Epithelial	Intermediate_Epithelial_downRRG	Intermediate_Epithelial_openRRR
0.0548927	FQ311924.2	chr5-69408507-69409397	6.75959	6.91897e-12	Intermediate_Epithelial	Intermediate_Epithelial_upRRG	Intermediate_Epithelial_openRRR
0.0569255	si:ch211-157p22.10	chr5-69490259-69492154	6.27528	1.74507e-10	Intermediate_Epithelial	Intermediate_Epithelial_downRRG	Intermediate_Epithelial_openRRR
0.0587003	si:ch211-157p22.10	chr5-69529372-69531216	4.06469	2.40487e-05	Intermediate_Epithelial	Intermediate_Epithelial_downRRG	Intermediate_Epithelial_openRRR
0.0738076	dlgap4b	chr6-1848649-1849533	4.78331	8.62143e-07	Intermediate_Epithelial	Intermediate_Epithelial_upRRG	Intermediate_Epithelial_openRRR
0.0549124	dlgap4b	chr6-1884391-1885325	3.6138	0.000150871	Intermediate_Epithelial	Intermediate_Epithelial_upRRG	Intermediate_Epithelial_openRRR
0.0614633	baz2ba	chr6-11887474-11889598	4.80728	7.64984e-07	Intermediate_Epithelial	Intermediate_Epithelial_upRRG	Intermediate_Epithelial_openRRR
0.0655156	card14	chr6-18267521-18268637	2.75039	0.00297626	Intermediate_Epithelial	Intermediate_Epithelial_downRRG	Intermediate_Epithelial_closeRRR
0.0825191	lepr	chr6-31223905-31224936	5.10332	1.66874e-07	Intermediate_Epithelial	Intermediate_Epithelial_downRRG	Intermediate_Epithelial_openRRR
0.0642054	nos1apa	chr6-35264720-35266364	4.01289	2.99896e-05	Intermediate_Epithelial	Intermediate_Epithelial_upRRG	Intermediate_Epithelial_openRRR
0.117757	krt4	chr6-39314754-39315248	7.77589	3.74586e-15	Intermediate_Epithelial	Intermediate_Epithelial_upRRG	Intermediate_Epithelial_openRRR
0.149555	krt4	chr6-39323416-39324928	7.44457	4.86285e-14	Intermediate_Epithelial	Intermediate_Epithelial_upRRG	Intermediate_Epithelial_openRRR
0.13512	krt4	chr6-39352322-39354409	7.14441	4.51922e-13	Intermediate_Epithelial	Intermediate_Epithelial_upRRG	Intermediate_Epithelial_openRRR
0.129352	krt4	chr6-39361368-39363099	4.95175	3.67752e-07	Intermediate_Epithelial	Intermediate_Epithelial_upRRG	Intermediate_Epithelial_openRRR
0.0707589	col7a1	chr6-40268900-40269869	2.82881	0.00233604	Intermediate_Epithelial	Intermediate_Epithelial_upRRG	Intermediate_Epithelial_openRRR
0.0535675	srgap3	chr6-41517937-41518783	5.10806	1.62738e-07	Intermediate_Epithelial	Intermediate_Epithelial_downRRG	Intermediate_Epithelial_closeRRR
0.051461	srgap3	chr6-41636465-41637320	4.94683	3.77165e-07	Intermediate_Epithelial	Intermediate_Epithelial_downRRG	Intermediate_Epithelial_closeRRR
0.0938997	kcnb1	chr6-46563882-46566691	7.08231	7.0884e-13	Intermediate_Epithelial	Intermediate_Epithelial_downRRG	Intermediate_Epithelial_closeRRR
0.155138	ptgis	chr6-46563882-46566691	10.383	1.48091e-25	Intermediate_Epithelial	Intermediate_Epithelial_downRRG	Intermediate_Epithelial_closeRRR
0.0570146	tgm8	chr6-59957440-59959305	10.3473	2.15225e-25	Intermediate_Epithelial	Intermediate_Epithelial_upRRG	Intermediate_Epithelial_openRRR
0.0586286	ltb4r2a	chr7-5069367-5070794	2.86175	0.00210656	Intermediate_Epithelial	Intermediate_Epithelial_upRRG	Intermediate_Epithelial_openRRR
0.120476	pnp5a	chr7-6660502-6663024	5.02912	2.46363e-07	Intermediate_Epithelial	Intermediate_Epithelial_downRRG	Intermediate_Epithelial_closeRRR
0.202898	pnp5a	chr7-6668373-6669869	10.1543	1.58477e-24	Intermediate_Epithelial	Intermediate_Epithelial_downRRG	Intermediate_Epithelial_closeRRR
0.115392	dusp19b	chr7-6660502-6663024	5.87952	2.05729e-09	Intermediate_Epithelial	Intermediate_Epithelial_downRRG	Intermediate_Epithelial_closeRRR
0.147616	dusp19b	chr7-6668373-6669869	8.83865	4.84406e-19	Intermediate_Epithelial	Intermediate_Epithelial_downRRG	Intermediate_Epithelial_closeRRR
0.201459	CABZ01030282.1	chr7-7837201-7839323	18.7076	2.14554e-78	Intermediate_Epithelial	Intermediate_Epithelial_downRRG	Intermediate_Epithelial_openRRR
0.265901	cxcl8b.1	chr7-7837201-7839323	19.4446	1.61849e-84	Intermediate_Epithelial	Intermediate_Epithelial_downRRG	Intermediate_Epithelial_openRRR
0.0780612	rgs12a	chr7-18484061-18485088	4.61745	1.94242e-06	Intermediate_Epithelial	Intermediate_Epithelial_upRRG	Intermediate_Epithelial_openRRR
0.0643412	il13ra1	chr7-19221541-19222290	4.68691	1.38678e-06	Intermediate_Epithelial	Intermediate_Epithelial_downRRG	Intermediate_Epithelial_closeRRR
0.0516221	fgf11a	chr7-22362207-22363300	5.0091	2.73424e-07	Intermediate_Epithelial	Intermediate_Epithelial_upRRG	Intermediate_Epithelial_openRRR
0.0594011	tnfsf10l	chr7-22907310-22909587	4.10247	2.04378e-05	Intermediate_Epithelial	Intermediate_Epithelial_upRRG	Intermediate_Epithelial_openRRR
0.0862886	tnfsf10l	chr7-22975326-22976507	3.81528	6.80133e-05	Intermediate_Epithelial	Intermediate_Epithelial_upRRG	Intermediate_Epithelial_openRRR
0.0845497	htr2cl1	chr7-23234812-23235873	4.21771	1.23398e-05	Intermediate_Epithelial	Intermediate_Epithelial_downRRG	Intermediate_Epithelial_openRRR
0.0692154	txn	chr7-24463454-24465089	3.58365	0.000169412	Intermediate_Epithelial	Intermediate_Epithelial_upRRG	Intermediate_Epithelial_openRRR
0.0562414	tln2a	chr7-29863297-29864801	4.78383	8.59914e-07	Intermediate_Epithelial	Intermediate_Epithelial_upRRG	Intermediate_Epithelial_openRRR
0.0564488	tln2a	chr7-29878024-29878818	4.64525	1.6983e-06	Intermediate_Epithelial	Intermediate_Epithelial_upRRG	Intermediate_Epithelial_openRRR
0.0895689	myo1ea	chr7-30638593-30639491	5.16501	1.20214e-07	Intermediate_Epithelial	Intermediate_Epithelial_downRRG	Intermediate_Epithelial_closeRRR
0.0641737	myo1ea	chr7-30666240-30667568	2.63228	0.00424066	Intermediate_Epithelial	Intermediate_Epithelial_downRRG	Intermediate_Epithelial_openRRR
0.171082	cd81a	chr7-33022325-33024099	10.1252	2.13548e-24	Intermediate_Epithelial	Intermediate_Epithelial_upRRG	Intermediate_Epithelial_openRRR
0.0517537	tle3b	chr7-33634090-33635741	4.8187	7.2249e-07	Intermediate_Epithelial	Intermediate_Epithelial_downRRG	Intermediate_Epithelial_openRRR
0.103602	sall1a	chr7-37258543-37259918	5.38278	3.6672e-08	Intermediate_Epithelial	Intermediate_Epithelial_upRRG	Intermediate_Epithelial_openRRR
0.107174	sall1a	chr7-37267954-37269066	4.40257	5.34871e-06	Intermediate_Epithelial	Intermediate_Epithelial_upRRG	Intermediate_Epithelial_openRRR
0.107232	sall1a	chr7-37376170-37377623	8.68829	1.83972e-18	Intermediate_Epithelial	Intermediate_Epithelial_upRRG	Intermediate_Epithelial_openRRR
0.0928548	creb3l1	chr7-38896833-38898542	4.15992	1.59179e-05	Intermediate_Epithelial	Intermediate_Epithelial_downRRG	Intermediate_Epithelial_closeRRR
0.0526869	dgkza	chr7-38896833-38898542	2.15581	0.0155493	Intermediate_Epithelial	Intermediate_Epithelial_downRRG	Intermediate_Epithelial_closeRRR
0.120542	creb3l1	chr7-38906055-38907141	5.65232	7.91478e-09	Intermediate_Epithelial	Intermediate_Epithelial_downRRG	Intermediate_Epithelial_closeRRR
0.135834	creb3l1	chr7-38921334-38922242	6.21536	2.56041e-10	Intermediate_Epithelial	Intermediate_Epithelial_downRRG	Intermediate_Epithelial_closeRRR
0.0651757	dgkza	chr7-38906055-38907141	2.80497	0.00251605	Intermediate_Epithelial	Intermediate_Epithelial_downRRG	Intermediate_Epithelial_closeRRR
0.058632	dgkza	chr7-38921334-38922242	2.53738	0.00558435	Intermediate_Epithelial	Intermediate_Epithelial_downRRG	Intermediate_Epithelial_closeRRR
0.111793	mdka	chr7-39168418-39170487	7.08015	7.19993e-13	Intermediate_Epithelial	Intermediate_Epithelial_upRRG	Intermediate_Epithelial_openRRR
0.102686	mdka	chr7-39185754-39187552	4.93947	3.91681e-07	Intermediate_Epithelial	Intermediate_Epithelial_upRRG	Intermediate_Epithelial_openRRR
0.0963457	hrh3	chr7-41748456-41749615	10.0937	2.94578e-24	Intermediate_Epithelial	Intermediate_Epithelial_upRRG	Intermediate_Epithelial_openRRR
0.0547753	hrh3	chr7-41782762-41783976	4.75748	9.80103e-07	Intermediate_Epithelial	Intermediate_Epithelial_upRRG	Intermediate_Epithelial_openRRR
0.0513014	cd44a	chr7-49824862-49826407	3.29706	0.000488505	Intermediate_Epithelial	Intermediate_Epithelial_upRRG	Intermediate_Epithelial_openRRR
0.0578207	ano1	chr7-54361154-54362720	2.20114	0.0138631	Intermediate_Epithelial	Intermediate_Epithelial_downRRG	Intermediate_Epithelial_closeRRR
0.0617454	ano1	chr7-54369362-54370756	3.0576	0.0011156	Intermediate_Epithelial	Intermediate_Epithelial_downRRG	Intermediate_Epithelial_closeRRR
0.0907839	ano1	chr7-54442824-54443767	3.42816	0.000303849	Intermediate_Epithelial	Intermediate_Epithelial_downRRG	Intermediate_Epithelial_closeRRR
0.0891821	camk2d1	chr7-57700864-57702202	6.9376	1.99407e-12	Intermediate_Epithelial	Intermediate_Epithelial_downRRG	Intermediate_Epithelial_openRRR
0.0839092	zfhx3	chr7-68416506-68417031	4.23469	1.14432e-05	Intermediate_Epithelial	Intermediate_Epithelial_upRRG	Intermediate_Epithelial_openRRR
0.0509125	si:ch73-252p3.1	chr7-73735516-73736176	5.66179	7.48993e-09	Intermediate_Epithelial	Intermediate_Epithelial_upRRG	Intermediate_Epithelial_openRRR
0.0704696	dynll1	chr8-2495700-2496686	4.76771	9.31668e-07	Intermediate_Epithelial	Intermediate_Epithelial_upRRG	Intermediate_Epithelial_openRRR
0.0774714	zgc:113363	chr8-7847686-7848682	6.43767	6.0659e-11	Intermediate_Epithelial	Intermediate_Epithelial_upRRG	Intermediate_Epithelial_openRRR
0.0566044	cdk16	chr8-8443940-8444268	5.06154	2.07944e-07	Intermediate_Epithelial	Intermediate_Epithelial_downRRG	Intermediate_Epithelial_closeRRR
0.0831307	itgb4	chr8-13080254-13081278	4.32476	7.63486e-06	Intermediate_Epithelial	Intermediate_Epithelial_downRRG	Intermediate_Epithelial_closeRRR
0.0856692	pde4d	chr8-16989653-16990664	6.16041	3.62776e-10	Intermediate_Epithelial	Intermediate_Epithelial_upRRG	Intermediate_Epithelial_openRRR
0.117962	slc6a17	chr8-24850770-24851511	15.5034	1.64504e-54	Intermediate_Epithelial	Intermediate_Epithelial_upRRG	Intermediate_Epithelial_openRRR
0.12252	slc6a17	chr8-24853966-24855085	13.3339	7.35256e-41	Intermediate_Epithelial	Intermediate_Epithelial_upRRG	Intermediate_Epithelial_openRRR
-0.0675146	slc38a5a	chr8-25680870-25682071	-3.16762	0.000768456	Intermediate_Epithelial	Intermediate_Epithelial_downRRG	Intermediate_Epithelial_openRRR
0.0610549	mapk4	chr8-29755416-29756074	6.00441	9.6017e-10	Intermediate_Epithelial	Intermediate_Epithelial_upRRG	Intermediate_Epithelial_openRRR
0.0702714	slc20a2	chr8-29755416-29756074	6.64357	1.5309e-11	Intermediate_Epithelial	Intermediate_Epithelial_upRRG	Intermediate_Epithelial_openRRR
0.0686563	aopep	chr8-30283722-30285471	3.55401	0.000189701	Intermediate_Epithelial	Intermediate_Epithelial_upRRG	Intermediate_Epithelial_closeRRR
0.145997	csf1b	chr8-37167666-37169089	6.53986	3.0789e-11	Intermediate_Epithelial	Intermediate_Epithelial_downRRG	Intermediate_Epithelial_closeRRR
0.0773346	rab11fip1a	chr8-38008994-38010571	4.81564	7.33637e-07	Intermediate_Epithelial	Intermediate_Epithelial_downRRG	Intermediate_Epithelial_closeRRR
0.103733	rab11fip1a	chr8-38013974-38014663	4.69256	1.34905e-06	Intermediate_Epithelial	Intermediate_Epithelial_downRRG	Intermediate_Epithelial_closeRRR
0.0933334	ggt1a	chr8-40054750-40055782	5.51602	1.73384e-08	Intermediate_Epithelial	Intermediate_Epithelial_upRRG	Intermediate_Epithelial_openRRR
0.145737	ggt1a	chr8-40071488-40073404	8.46882	1.23948e-17	Intermediate_Epithelial	Intermediate_Epithelial_upRRG	Intermediate_Epithelial_openRRR
0.0817982	dusp2	chr8-40618876-40619680	9.23314	1.31407e-20	Intermediate_Epithelial	Intermediate_Epithelial_upRRG	Intermediate_Epithelial_openRRR
0.0812874	slc23a2	chr8-42897400-42898824	2.75107	0.00297005	Intermediate_Epithelial	Intermediate_Epithelial_downRRG	Intermediate_Epithelial_closeRRR
0.104098	slc23a2	chr8-42932205-42933166	3.9432	4.02005e-05	Intermediate_Epithelial	Intermediate_Epithelial_downRRG	Intermediate_Epithelial_openRRR
0.0795528	plch2a	chr8-47357487-47358548	3.91673	4.48796e-05	Intermediate_Epithelial	Intermediate_Epithelial_upRRG	Intermediate_Epithelial_openRRR
0.0559473	fkbp1aa	chr8-49190656-49192027	4.7	1.30079e-06	Intermediate_Epithelial	Intermediate_Epithelial_upRRG	Intermediate_Epithelial_openRRR
0.117578	nkx3-1	chr8-50245335-50246518	4.78273	8.64655e-07	Intermediate_Epithelial	Intermediate_Epithelial_downRRG	Intermediate_Epithelial_openRRR
0.156171	nkx3-1	chr8-50248664-50249566	6.97479	1.53168e-12	Intermediate_Epithelial	Intermediate_Epithelial_downRRG	Intermediate_Epithelial_closeRRR
0.0610392	wnt5a	chr8-53656649-53657752	5.59697	1.09064e-08	Intermediate_Epithelial	Intermediate_Epithelial_upRRG	Intermediate_Epithelial_openRRR
0.0659945	irs2b	chr9-8494523-8495782	5.66915	7.17524e-09	Intermediate_Epithelial	Intermediate_Epithelial_upRRG	Intermediate_Epithelial_openRRR
0.0609248	cxcr4b	chr9-10666754-10668038	8.77703	8.39222e-19	Intermediate_Epithelial	Intermediate_Epithelial_upRRG	Intermediate_Epithelial_openRRR
0.073168	RAPH1	chr9-13887338-13888236	3.14298	0.0008362	Intermediate_Epithelial	Intermediate_Epithelial_upRRG	Intermediate_Epithelial_openRRR
0.150476	igsf3	chr9-20299141-20300067	5.83207	2.73725e-09	Intermediate_Epithelial	Intermediate_Epithelial_upRRG	Intermediate_Epithelial_openRRR
0.106818	igsf3	chr9-20353980-20354967	4.10982	1.97986e-05	Intermediate_Epithelial	Intermediate_Epithelial_upRRG	Intermediate_Epithelial_openRRR
0.161439	igsf3	chr9-20368860-20369657	5.89229	1.90442e-09	Intermediate_Epithelial	Intermediate_Epithelial_upRRG	Intermediate_Epithelial_openRRR
0.114252	igsf3	chr9-20372638-20374209	5.62351	9.35556e-09	Intermediate_Epithelial	Intermediate_Epithelial_upRRG	Intermediate_Epithelial_openRRR
0.0963797	igsf3	chr9-20449766-20451104	4.15709	1.61162e-05	Intermediate_Epithelial	Intermediate_Epithelial_upRRG	Intermediate_Epithelial_openRRR
0.0830953	lmo7a	chr9-21940462-21941197	2.43676	0.00740977	Intermediate_Epithelial	Intermediate_Epithelial_downRRG	Intermediate_Epithelial_closeRRR
0.096511	klf7b	chr9-28383180-28385487	10.133	1.97225e-24	Intermediate_Epithelial	Intermediate_Epithelial_upRRG	Intermediate_Epithelial_openRRR
0.0812435	f5	chr9-34094073-34095130	3.12301	0.000895068	Intermediate_Epithelial	Intermediate_Epithelial_upRRG	Intermediate_Epithelial_openRRR
0.113378	f5	chr9-34129582-34130467	4.10757	1.99919e-05	Intermediate_Epithelial	Intermediate_Epithelial_upRRG	Intermediate_Epithelial_openRRR
0.0702149	tanc1b	chr9-52289317-52289856	4.11219	1.95959e-05	Intermediate_Epithelial	Intermediate_Epithelial_upRRG	Intermediate_Epithelial_openRRR
0.135606	ednrbb	chr9-53820451-53821098	7.55454	2.10178e-14	Intermediate_Epithelial	Intermediate_Epithelial_upRRG	Intermediate_Epithelial_openRRR
0.0522976	pdlim5b	chr10-1228075-1229160	2.80535	0.00251313	Intermediate_Epithelial	Intermediate_Epithelial_downRRG	Intermediate_Epithelial_openRRR
0.0526254	ccl27b	chr10-2669037-2669725	4.83338	6.71175e-07	Intermediate_Epithelial	Intermediate_Epithelial_downRRG	Intermediate_Epithelial_closeRRR
0.0989271	ror2	chr10-5312092-5313191	5.48634	2.05177e-08	Intermediate_Epithelial	Intermediate_Epithelial_upRRG	Intermediate_Epithelial_openRRR
0.0531185	pmaip1	chr10-8653860-8654420	8.88096	3.31415e-19	Intermediate_Epithelial	Intermediate_Epithelial_downRRG	Intermediate_Epithelial_closeRRR
0.0519837	slc20a1b	chr10-17772661-17773584	3.12207	0.000897906	Intermediate_Epithelial	Intermediate_Epithelial_downRRG	Intermediate_Epithelial_closeRRR
0.0984302	ehbp1l1b	chr10-26873178-26874169	4.61547	1.96104e-06	Intermediate_Epithelial	Intermediate_Epithelial_upRRG	Intermediate_Epithelial_openRRR
0.0862166	cxadr	chr10-27062055-27063388	4.33244	7.37343e-06	Intermediate_Epithelial	Intermediate_Epithelial_downRRG	Intermediate_Epithelial_openRRR
0.087602	auts2a	chr10-27691921-27692991	5.51531	1.74087e-08	Intermediate_Epithelial	Intermediate_Epithelial_downRRG	Intermediate_Epithelial_closeRRR
0.0994086	auts2a	chr10-27700625-27701462	7.27601	1.71918e-13	Intermediate_Epithelial	Intermediate_Epithelial_downRRG	Intermediate_Epithelial_closeRRR
0.0745211	cblb	chr10-28620079-28620741	5.70951	5.66509e-09	Intermediate_Epithelial	Intermediate_Epithelial_upRRG	Intermediate_Epithelial_openRRR
0.090057	cblb	chr10-28645081-28646170	6.2794	1.69936e-10	Intermediate_Epithelial	Intermediate_Epithelial_upRRG	Intermediate_Epithelial_openRRR
0.111063	rxfp2a	chr10-33704014-33705213	4.16098	1.5844e-05	Intermediate_Epithelial	Intermediate_Epithelial_downRRG	Intermediate_Epithelial_openRRR
0.0687513	ucp2	chr10-36674010-36676080	6.77012	6.43367e-12	Intermediate_Epithelial	Intermediate_Epithelial_upRRG	Intermediate_Epithelial_openRRR
0.0521851	vezf1a	chr10-37089281-37090112	4.68709	1.38556e-06	Intermediate_Epithelial	Intermediate_Epithelial_upRRG	Intermediate_Epithelial_openRRR
0.0553618	ABCA7	chr11-5683944-5685192	3.86691	5.51116e-05	Intermediate_Epithelial	Intermediate_Epithelial_downRRG	Intermediate_Epithelial_openRRR
0.197591	ccl25b	chr11-6228828-6230784	9.15996	2.5958e-20	Intermediate_Epithelial	Intermediate_Epithelial_downRRG	Intermediate_Epithelial_closeRRR
0.165154	ccl25b	chr11-6242755-6243835	7.19965	3.01832e-13	Intermediate_Epithelial	Intermediate_Epithelial_downRRG	Intermediate_Epithelial_closeRRR
0.145904	si:ch211-1a19.3	chr11-13629553-13630741	13.9332	1.99174e-44	Intermediate_Epithelial	Intermediate_Epithelial_upRRG	Intermediate_Epithelial_openRRR
0.0900297	MDFI	chr11-22137064-22138234	4.99785	2.89869e-07	Intermediate_Epithelial	Intermediate_Epithelial_upRRG	Intermediate_Epithelial_openRRR
0.0536957	plekha6	chr11-23411861-23412700	2.14811	0.0158525	Intermediate_Epithelial	Intermediate_Epithelial_downRRG	Intermediate_Epithelial_openRRR
0.12555	mxra8a	chr11-24454069-24455659	6.57207	2.48103e-11	Intermediate_Epithelial	Intermediate_Epithelial_upRRG	Intermediate_Epithelial_openRRR
0.104841	zgc:153665	chr11-30550556-30551397	5.63303	8.85374e-09	Intermediate_Epithelial	Intermediate_Epithelial_upRRG	Intermediate_Epithelial_closeRRR
0.11499	zgc:153665	chr11-30555293-30555830	8.54254	6.56524e-18	Intermediate_Epithelial	Intermediate_Epithelial_upRRG	Intermediate_Epithelial_closeRRR
0.0503874	gnai2a	chr11-34838448-34839551	2.60436	0.00460225	Intermediate_Epithelial	Intermediate_Epithelial_upRRG	Intermediate_Epithelial_openRRR
0.0535236	bhlhe40	chr11-35780400-35781191	8.43537	1.65085e-17	Intermediate_Epithelial	Intermediate_Epithelial_upRRG	Intermediate_Epithelial_openRRR
0.0546866	sox13	chr11-37821057-37821812	4.83974	6.50054e-07	Intermediate_Epithelial	Intermediate_Epithelial_downRRG	Intermediate_Epithelial_openRRR
0.0534857	slc29a1b	chr11-43459688-43460672	5.9151	1.65832e-09	Intermediate_Epithelial	Intermediate_Epithelial_upRRG	Intermediate_Epithelial_openRRR
0.0890791	tob1b	chr12-838182-838666	6.30196	1.46949e-10	Intermediate_Epithelial	Intermediate_Epithelial_downRRG	Intermediate_Epithelial_closeRRR
0.0660524	jmjd1cb	chr12-8723406-8724264	5.535	1.55618e-08	Intermediate_Epithelial	Intermediate_Epithelial_upRRG	Intermediate_Epithelial_openRRR
0.0508436	ccser2b	chr12-13155121-13156633	2.27634	0.0114128	Intermediate_Epithelial	Intermediate_Epithelial_downRRG	Intermediate_Epithelial_openRRR
0.171939	cxl34c	chr12-13155121-13156633	6.94386	1.90765e-12	Intermediate_Epithelial	Intermediate_Epithelial_upRRG	Intermediate_Epithelial_openRRR
0.0785278	bambia	chr12-23465863-23467022	6.10516	5.1349e-10	Intermediate_Epithelial	Intermediate_Epithelial_upRRG	Intermediate_Epithelial_openRRR
0.0928046	itgb3b	chr12-26439354-26440075	7.78447	3.50017e-15	Intermediate_Epithelial	Intermediate_Epithelial_upRRG	Intermediate_Epithelial_openRRR
0.0780231	etv4	chr12-27597206-27598917	6.58752	2.2362e-11	Intermediate_Epithelial	Intermediate_Epithelial_upRRG	Intermediate_Epithelial_openRRR
0.0879654	qki2	chr12-34927622-34928859	6.6144	1.86535e-11	Intermediate_Epithelial	Intermediate_Epithelial_downRRG	Intermediate_Epithelial_closeRRR
0.0606137	CABZ01068358.1	chr12-45463260-45464390	4.1901	1.39414e-05	Intermediate_Epithelial	Intermediate_Epithelial_downRRG	Intermediate_Epithelial_closeRRR
0.058588	CABZ01068358.1	chr12-45487718-45488670	4.18867	1.40296e-05	Intermediate_Epithelial	Intermediate_Epithelial_downRRG	Intermediate_Epithelial_closeRRR
0.0743914	FO904966.2	chr12-46116553-46117422	4.92721	4.17053e-07	Intermediate_Epithelial	Intermediate_Epithelial_downRRG	Intermediate_Epithelial_closeRRR
0.101183	CABZ01048956.1	chr12-46116553-46117422	5.21442	9.21944e-08	Intermediate_Epithelial	Intermediate_Epithelial_downRRG	Intermediate_Epithelial_closeRRR
0.0908261	lzts2b	chr12-47715996-47716855	8.41859	1.90524e-17	Intermediate_Epithelial	Intermediate_Epithelial_upRRG	Intermediate_Epithelial_openRRR
0.0657366	lzts2b	chr12-47721178-47722150	4.36185	6.44828e-06	Intermediate_Epithelial	Intermediate_Epithelial_upRRG	Intermediate_Epithelial_openRRR
0.0512579	si:ch211-165e15.1	chr13-1466178-1466881	4.56717	2.47175e-06	Intermediate_Epithelial	Intermediate_Epithelial_upRRG	Intermediate_Epithelial_openRRR
0.0525519	si:ch211-165e15.1	chr13-1473519-1473959	5.29074	6.09105e-08	Intermediate_Epithelial	Intermediate_Epithelial_upRRG	Intermediate_Epithelial_openRRR
0.0783269	DST	chr13-1664332-1665104	4.83629	6.61413e-07	Intermediate_Epithelial	Intermediate_Epithelial_upRRG	Intermediate_Epithelial_openRRR
0.0770531	DST	chr13-1674160-1674846	5.84665	2.5078e-09	Intermediate_Epithelial	Intermediate_Epithelial_upRRG	Intermediate_Epithelial_openRRR
0.120282	zswim8	chr13-21828950-21830410	7.18194	3.43642e-13	Intermediate_Epithelial	Intermediate_Epithelial_upRRG	Intermediate_Epithelial_openRRR
0.0844318	zswim8	chr13-21831544-21832779	5.58436	1.17279e-08	Intermediate_Epithelial	Intermediate_Epithelial_upRRG	Intermediate_Epithelial_openRRR
0.0973965	zgc:193505	chr13-22681833-22682348	3.91345	4.54926e-05	Intermediate_Epithelial	Intermediate_Epithelial_downRRG	Intermediate_Epithelial_closeRRR
0.140321	adam8a	chr13-24682160-24683607	5.02425	2.52708e-07	Intermediate_Epithelial	Intermediate_Epithelial_upRRG	Intermediate_Epithelial_openRRR
0.0814355	adam8a	chr13-24690218-24691299	2.00444	0.0225116	Intermediate_Epithelial	Intermediate_Epithelial_upRRG	Intermediate_Epithelial_openRRR
0.14285	adam8a	chr13-24696269-24697107	4.33382	7.32728e-06	Intermediate_Epithelial	Intermediate_Epithelial_upRRG	Intermediate_Epithelial_openRRR
0.0905212	unc5b	chr13-29037128-29038073	5.63426	8.79063e-09	Intermediate_Epithelial	Intermediate_Epithelial_upRRG	Intermediate_Epithelial_openRRR
0.149209	unc5b	chr13-29176002-29177280	9.8649	2.95472e-23	Intermediate_Epithelial	Intermediate_Epithelial_upRRG	Intermediate_Epithelial_openRRR
0.141346	unc5b	chr13-29184770-29186513	10.5973	1.53306e-26	Intermediate_Epithelial	Intermediate_Epithelial_upRRG	Intermediate_Epithelial_openRRR
0.0851185	arg2	chr13-33039965-33041492	7.77696	3.71435e-15	Intermediate_Epithelial	Intermediate_Epithelial_downRRG	Intermediate_Epithelial_closeRRR
0.0690695	macrod2	chr13-33639744-33640700	2.2448	0.0123905	Intermediate_Epithelial	Intermediate_Epithelial_upRRG	Intermediate_Epithelial_closeRRR
0.0909636	actn1	chr13-36309354-36310376	4.22632	1.18772e-05	Intermediate_Epithelial	Intermediate_Epithelial_upRRG	Intermediate_Epithelial_openRRR
0.0810305	actn1	chr13-36342323-36343185	3.44478	0.000285763	Intermediate_Epithelial	Intermediate_Epithelial_upRRG	Intermediate_Epithelial_openRRR
0.0921562	FRMD1	chr13-39248824-39250496	6.81177	4.82028e-12	Intermediate_Epithelial	Intermediate_Epithelial_upRRG	Intermediate_Epithelial_openRRR
0.0518113	rsrp1	chr13-45460796-45461588	2.76792	0.00282075	Intermediate_Epithelial	Intermediate_Epithelial_downRRG	Intermediate_Epithelial_closeRRR
0.0555713	rsrp1	chr13-45531825-45533041	2.35063	0.00937094	Intermediate_Epithelial	Intermediate_Epithelial_downRRG	Intermediate_Epithelial_closeRRR
0.110577	marcksl1a	chr13-46112121-46112892	5.56946	1.27762e-08	Intermediate_Epithelial	Intermediate_Epithelial_upRRG	Intermediate_Epithelial_openRRR
0.110952	marcksl1a	chr13-46152587-46153212	4.87602	5.41248e-07	Intermediate_Epithelial	Intermediate_Epithelial_upRRG	Intermediate_Epithelial_openRRR
0.144482	marcksl1a	chr13-46155295-46155929	8.88764	3.12102e-19	Intermediate_Epithelial	Intermediate_Epithelial_upRRG	Intermediate_Epithelial_openRRR
0.10081	marcksl1a	chr13-46166542-46167799	4.21449	1.25174e-05	Intermediate_Epithelial	Intermediate_Epithelial_upRRG	Intermediate_Epithelial_openRRR
-0.072367	marcksl1a	chr13-46227131-46227931	-3.33342	0.000428922	Intermediate_Epithelial	Intermediate_Epithelial_upRRG	Intermediate_Epithelial_openRRR
0.0594585	bcl2l11	chr13-47368961-47369793	3.31427	0.000459418	Intermediate_Epithelial	Intermediate_Epithelial_upRRG	Intermediate_Epithelial_openRRR
0.0825987	bcl2l11	chr13-47376365-47378058	5.68873	6.39953e-09	Intermediate_Epithelial	Intermediate_Epithelial_upRRG	Intermediate_Epithelial_openRRR
0.0542056	si:ch1073-303k11.2	chr14-1104738-1105429	3.75457	8.68204e-05	Intermediate_Epithelial	Intermediate_Epithelial_upRRG	Intermediate_Epithelial_openRRR
0.0652111	fbxw11a	chr14-2563268-2564143	8.50126	9.37735e-18	Intermediate_Epithelial	Intermediate_Epithelial_upRRG	Intermediate_Epithelial_openRRR
0.0793802	nexmifb	chr14-11128925-11129959	6.76989	6.44396e-12	Intermediate_Epithelial	Intermediate_Epithelial_downRRG	Intermediate_Epithelial_openRRR
0.192217	spink2.1	chr14-15129863-15131871	9.22595	1.40532e-20	Intermediate_Epithelial	Intermediate_Epithelial_downRRG	Intermediate_Epithelial_closeRRR
0.142693	egr1	chr14-21330819-21332399	15.1274	5.34268e-52	Intermediate_Epithelial	Intermediate_Epithelial_downRRG	Intermediate_Epithelial_openRRR
0.150565	clcf1	chr14-22034557-22035575	11.9048	5.58876e-33	Intermediate_Epithelial	Intermediate_Epithelial_downRRG	Intermediate_Epithelial_closeRRR
0.0794405	clcf1	chr14-22079084-22080115	3.42695	0.000305195	Intermediate_Epithelial	Intermediate_Epithelial_downRRG	Intermediate_Epithelial_openRRR
0.0524916	slc43a1a	chr14-22079084-22080115	3.20883	0.000666385	Intermediate_Epithelial	Intermediate_Epithelial_downRRG	Intermediate_Epithelial_openRRR
0.176162	fosl1a	chr14-30737702-30740071	8.33147	3.99218e-17	Intermediate_Epithelial	Intermediate_Epithelial_downRRG	Intermediate_Epithelial_openRRR
0.0695115	tnip1	chr14-49389319-49389960	8.16797	1.56813e-16	Intermediate_Epithelial	Intermediate_Epithelial_downRRG	Intermediate_Epithelial_openRRR
0.0722635	LO018188.1	chr14-49549704-49550914	3.67817	0.000117456	Intermediate_Epithelial	Intermediate_Epithelial_upRRG	Intermediate_Epithelial_openRRR
0.0706348	LO018188.1	chr14-49621694-49622868	3.74782	8.91893e-05	Intermediate_Epithelial	Intermediate_Epithelial_upRRG	Intermediate_Epithelial_openRRR
0.0650582	tnfrsf19	chr15-8267645-8268558	3.36255	0.000386137	Intermediate_Epithelial	Intermediate_Epithelial_upRRG	Intermediate_Epithelial_openRRR
0.0644679	zgc:162730	chr15-13996000-13997944	7.15112	4.3035e-13	Intermediate_Epithelial	Intermediate_Epithelial_downRRG	Intermediate_Epithelial_closeRRR
0.0883776	traf4a	chr15-15560236-15561085	2.51116	0.00601675	Intermediate_Epithelial	Intermediate_Epithelial_downRRG	Intermediate_Epithelial_closeRRR
0.151678	vmp1	chr15-17368359-17369555	5.85238	2.42297e-09	Intermediate_Epithelial	Intermediate_Epithelial_upRRG	Intermediate_Epithelial_openRRR
0.15747	vmp1	chr15-17369750-17370486	5.97917	1.12137e-09	Intermediate_Epithelial	Intermediate_Epithelial_upRRG	Intermediate_Epithelial_openRRR
0.263396	vmp1	chr15-17375278-17378260	12.1552	2.69155e-34	Intermediate_Epithelial	Intermediate_Epithelial_upRRG	Intermediate_Epithelial_openRRR
0.0923504	CR848791.3	chr15-17368359-17369555	6.85365	3.59934e-12	Intermediate_Epithelial	Intermediate_Epithelial_upRRG	Intermediate_Epithelial_openRRR
0.0949148	CR848791.3	chr15-17369750-17370486	5.48923	2.01843e-08	Intermediate_Epithelial	Intermediate_Epithelial_upRRG	Intermediate_Epithelial_openRRR
0.20924	CR848791.3	chr15-17375278-17378260	13.7977	1.31525e-43	Intermediate_Epithelial	Intermediate_Epithelial_upRRG	Intermediate_Epithelial_openRRR
0.0566444	zbtb16b	chr15-18311812-18312859	3.20611	0.000672713	Intermediate_Epithelial	Intermediate_Epithelial_downRRG	Intermediate_Epithelial_closeRRR
0.113286	arhgap32a	chr15-19124324-19124853	7.44995	4.66877e-14	Intermediate_Epithelial	Intermediate_Epithelial_upRRG	Intermediate_Epithelial_openRRR
0.150615	arhgap32a	chr15-19127846-19128731	6.83206	4.1851e-12	Intermediate_Epithelial	Intermediate_Epithelial_upRRG	Intermediate_Epithelial_openRRR
0.158854	arhgap32a	chr15-19130991-19132030	6.92072	2.24676e-12	Intermediate_Epithelial	Intermediate_Epithelial_upRRG	Intermediate_Epithelial_openRRR
0.0566909	plekhg2	chr15-20273822-20274789	3.59814	0.000160248	Intermediate_Epithelial	Intermediate_Epithelial_downRRG	Intermediate_Epithelial_openRRR
0.0631395	myo18ab	chr15-23952452-23953528	4.59095	2.20616e-06	Intermediate_Epithelial	Intermediate_Epithelial_downRRG	Intermediate_Epithelial_closeRRR
0.05167	smtnl	chr15-24628208-24629037	3.64396	0.000134237	Intermediate_Epithelial	Intermediate_Epithelial_upRRG	Intermediate_Epithelial_openRRR
0.0510818	tlcd2	chr15-25523219-25523710	5.38117	3.70012e-08	Intermediate_Epithelial	Intermediate_Epithelial_downRRG	Intermediate_Epithelial_closeRRR
0.0576681	taok1a	chr15-25581247-25581713	4.49105	3.54361e-06	Intermediate_Epithelial	Intermediate_Epithelial_upRRG	Intermediate_Epithelial_openRRR
0.0634448	taok1a	chr15-25610016-25611274	3.75183	8.7776e-05	Intermediate_Epithelial	Intermediate_Epithelial_upRRG	Intermediate_Epithelial_openRRR
0.0559886	taok1a	chr15-25615236-25616231	3.01921	0.00126717	Intermediate_Epithelial	Intermediate_Epithelial_upRRG	Intermediate_Epithelial_openRRR
0.109526	si:ch211-207n23.2	chr15-29597932-29599252	5.93902	1.43365e-09	Intermediate_Epithelial	Intermediate_Epithelial_upRRG	Intermediate_Epithelial_openRRR
-0.0617321	si:dkey-262k9.2	chr15-36470723-36472233	-2.94888	0.00159464	Intermediate_Epithelial	Intermediate_Epithelial_upRRG	Intermediate_Epithelial_closeRRR
0.0755966	si:dkey-262k9.2	chr15-36474164-36474920	2.87612	0.00201296	Intermediate_Epithelial	Intermediate_Epithelial_upRRG	Intermediate_Epithelial_openRRR
0.100045	aplp1	chr15-37131512-37132513	5.4812	2.11221e-08	Intermediate_Epithelial	Intermediate_Epithelial_downRRG	Intermediate_Epithelial_openRRR
0.0588332	serpine2	chr15-43255306-43256305	5.15222	1.28713e-07	Intermediate_Epithelial	Intermediate_Epithelial_upRRG	Intermediate_Epithelial_openRRR
0.153035	actn4	chr15-43380563-43381230	4.91536	4.43106e-07	Intermediate_Epithelial	Intermediate_Epithelial_downRRG	Intermediate_Epithelial_openRRR
0.0714732	gria4a	chr15-44789100-44789807	8.38046	2.63607e-17	Intermediate_Epithelial	Intermediate_Epithelial_upRRG	Intermediate_Epithelial_openRRR
0.0933488	pdgfd	chr15-44948760-44949590	6.22734	2.37213e-10	Intermediate_Epithelial	Intermediate_Epithelial_upRRG	Intermediate_Epithelial_openRRR
0.111931	pdgfd	chr15-44976855-44977855	5.88483	1.99233e-09	Intermediate_Epithelial	Intermediate_Epithelial_upRRG	Intermediate_Epithelial_openRRR
0.0630957	pdgfd	chr15-44982143-44982991	3.22129	0.000638074	Intermediate_Epithelial	Intermediate_Epithelial_upRRG	Intermediate_Epithelial_openRRR
0.0714576	ctnnb1	chr16-6144186-6145197	3.71531	0.000101477	Intermediate_Epithelial	Intermediate_Epithelial_upRRG	Intermediate_Epithelial_openRRR
0.0507438	mboat1	chr16-6415715-6416742	3.36545	0.000382098	Intermediate_Epithelial	Intermediate_Epithelial_downRRG	Intermediate_Epithelial_closeRRR
0.0854642	prdm1a	chr16-7482297-7483301	5.40327	3.27179e-08	Intermediate_Epithelial	Intermediate_Epithelial_upRRG	Intermediate_Epithelial_openRRR
0.0516223	zgc:174888	chr16-13851599-13852427	5.00682	2.76684e-07	Intermediate_Epithelial	Intermediate_Epithelial_downRRG	Intermediate_Epithelial_closeRRR
0.0866185	nbeal2	chr16-16502647-16503776	3.56362	0.000182891	Intermediate_Epithelial	Intermediate_Epithelial_downRRG	Intermediate_Epithelial_closeRRR
0.119367	fhod3b	chr16-18959637-18961051	5.28285	6.35945e-08	Intermediate_Epithelial	Intermediate_Epithelial_upRRG	Intermediate_Epithelial_openRRR
0.0682268	creb5b	chr16-20635492-20636142	6.21369	2.5878e-10	Intermediate_Epithelial	Intermediate_Epithelial_downRRG	Intermediate_Epithelial_closeRRR
0.0543388	tax1bp1b	chr16-20879400-20881021	3.71179	0.000102899	Intermediate_Epithelial	Intermediate_Epithelial_downRRG	Intermediate_Epithelial_openRRR
0.0979371	si:ch211-105c13.3	chr16-22613759-22614659	5.12952	1.45238e-07	Intermediate_Epithelial	Intermediate_Epithelial_upRRG	Intermediate_Epithelial_openRRR
0.0564852	si:dkey-247k7.2	chr16-23412181-23412822	3.34872	0.000405923	Intermediate_Epithelial	Intermediate_Epithelial_upRRG	Intermediate_Epithelial_openRRR
-0.0546812	s100a10b	chr16-23456422-23457458	-2.67909	0.00369109	Intermediate_Epithelial	Intermediate_Epithelial_upRRG	Intermediate_Epithelial_openRRR
0.0648532	icn	chr16-23412181-23412822	4.39332	5.5817e-06	Intermediate_Epithelial	Intermediate_Epithelial_downRRG	Intermediate_Epithelial_openRRR
0.0733198	icn2	chr16-23412181-23412822	3.95265	3.86445e-05	Intermediate_Epithelial	Intermediate_Epithelial_upRRG	Intermediate_Epithelial_openRRR
0.0549743	icn2	chr16-23456422-23457458	2.6187	0.00441327	Intermediate_Epithelial	Intermediate_Epithelial_upRRG	Intermediate_Epithelial_openRRR
0.0743657	galnt1	chr16-26894582-26895895	3.92101	4.40893e-05	Intermediate_Epithelial	Intermediate_Epithelial_upRRG	Intermediate_Epithelial_openRRR
0.0886923	mef2d	chr16-29099696-29100517	5.99503	1.01722e-09	Intermediate_Epithelial	Intermediate_Epithelial_downRRG	Intermediate_Epithelial_closeRRR
0.0665998	sema6e	chr16-30011687-30012854	3.643	0.00013474	Intermediate_Epithelial	Intermediate_Epithelial_upRRG	Intermediate_Epithelial_openRRR
0.113804	ptp4a3b	chr16-31477165-31477996	5.18383	1.08688e-07	Intermediate_Epithelial	Intermediate_Epithelial_upRRG	Intermediate_Epithelial_closeRRR
0.102768	fhl3a	chr16-33745123-33746036	4.3392	7.14996e-06	Intermediate_Epithelial	Intermediate_Epithelial_upRRG	Intermediate_Epithelial_openRRR
0.0795378	sh3d21	chr16-35926435-35928039	4.43573	4.58799e-06	Intermediate_Epithelial	Intermediate_Epithelial_upRRG	Intermediate_Epithelial_openRRR
0.0531684	cdc42se1	chr16-38381464-38382982	3.56704	0.000180518	Intermediate_Epithelial	Intermediate_Epithelial_upRRG	Intermediate_Epithelial_closeRRR
0.0636698	tgfbr2b	chr16-39520204-39520683	6.72808	8.59579e-12	Intermediate_Epithelial	Intermediate_Epithelial_upRRG	Intermediate_Epithelial_openRRR
0.0576179	serpinb1l4	chr16-51298503-51299374	4.28295	9.22163e-06	Intermediate_Epithelial	Intermediate_Epithelial_upRRG	Intermediate_Epithelial_closeRRR
0.0562646	kif13ba	chr17-16217852-16218444	5.47186	2.22664e-08	Intermediate_Epithelial	Intermediate_Epithelial_upRRG	Intermediate_Epithelial_openRRR
0.0618198	grhl3	chr17-26939215-26939573	7.7681	3.98374e-15	Intermediate_Epithelial	Intermediate_Epithelial_downRRG	Intermediate_Epithelial_closeRRR
0.0833947	grhl3	chr17-26969828-26970874	4.36045	6.4897e-06	Intermediate_Epithelial	Intermediate_Epithelial_downRRG	Intermediate_Epithelial_closeRRR
0.0591989	cnksr1	chr17-27023707-27024905	4.12995	1.81424e-05	Intermediate_Epithelial	Intermediate_Epithelial_upRRG	Intermediate_Epithelial_openRRR
0.073037	asap3	chr17-27332895-27334997	5.37354	3.86022e-08	Intermediate_Epithelial	Intermediate_Epithelial_upRRG	Intermediate_Epithelial_openRRR
0.0908965	itsn2b	chr17-30501259-30501905	4.90361	4.70462e-07	Intermediate_Epithelial	Intermediate_Epithelial_downRRG	Intermediate_Epithelial_openRRR
0.0570929	itsn2b	chr17-30614049-30615258	2.23307	0.0127723	Intermediate_Epithelial	Intermediate_Epithelial_downRRG	Intermediate_Epithelial_closeRRR
0.0570303	mpp5a	chr17-34222618-34223656	3.31939	0.000451077	Intermediate_Epithelial	Intermediate_Epithelial_downRRG	Intermediate_Epithelial_closeRRR
0.0542186	asap2a	chr17-35158484-35159575	3.1657	0.000773563	Intermediate_Epithelial	Intermediate_Epithelial_upRRG	Intermediate_Epithelial_openRRR
0.0582256	sox11a	chr17-35890669-35891767	4.94069	3.89238e-07	Intermediate_Epithelial	Intermediate_Epithelial_upRRG	Intermediate_Epithelial_openRRR
0.0515397	elmsan1b	chr17-37394859-37397110	3.85491	5.78853e-05	Intermediate_Epithelial	Intermediate_Epithelial_downRRG	Intermediate_Epithelial_closeRRR
0.0678092	crip1	chr17-37394859-37397110	6.44495	5.78206e-11	Intermediate_Epithelial	Intermediate_Epithelial_downRRG	Intermediate_Epithelial_closeRRR
0.0948672	crip1	chr17-37401955-37403138	8.24415	8.31675e-17	Intermediate_Epithelial	Intermediate_Epithelial_downRRG	Intermediate_Epithelial_closeRRR
0.143366	ralgapa2	chr17-41783407-41784342	4.8244	7.02127e-07	Intermediate_Epithelial	Intermediate_Epithelial_downRRG	Intermediate_Epithelial_closeRRR
0.0681697	si:dkeyp-1h4.6	chr18-7583996-7585286	4.07475	2.30314e-05	Intermediate_Epithelial	Intermediate_Epithelial_downRRG	Intermediate_Epithelial_openRRR
0.0540207	impdh1a	chr18-8829679-8831276	4.59718	2.14128e-06	Intermediate_Epithelial	Intermediate_Epithelial_downRRG	Intermediate_Epithelial_openRRR
0.0670681	CACNA2D1	chr18-9823568-9824399	5.37252	3.88218e-08	Intermediate_Epithelial	Intermediate_Epithelial_upRRG	Intermediate_Epithelial_openRRR
0.0609594	mical3a.1	chr18-10799000-10800110	3.38984	0.000349671	Intermediate_Epithelial	Intermediate_Epithelial_upRRG	Intermediate_Epithelial_openRRR
0.0986747	tspan9a	chr18-11394577-11395330	4.73741	1.08235e-06	Intermediate_Epithelial	Intermediate_Epithelial_upRRG	Intermediate_Epithelial_openRRR
0.0921937	btbd11b	chr18-15030955-15032243	5.89086	1.92092e-09	Intermediate_Epithelial	Intermediate_Epithelial_upRRG	Intermediate_Epithelial_openRRR
0.101839	btbd11b	chr18-15039941-15041130	4.11473	1.93812e-05	Intermediate_Epithelial	Intermediate_Epithelial_upRRG	Intermediate_Epithelial_openRRR
0.130291	btbd11b	chr18-15045564-15046514	5.65177	7.94018e-09	Intermediate_Epithelial	Intermediate_Epithelial_upRRG	Intermediate_Epithelial_openRRR
0.0991178	btbd11b	chr18-15054788-15056341	4.29114	8.88784e-06	Intermediate_Epithelial	Intermediate_Epithelial_upRRG	Intermediate_Epithelial_openRRR
0.0821046	ranbp10	chr18-21964768-21966068	8.46046	1.33164e-17	Intermediate_Epithelial	Intermediate_Epithelial_upRRG	Intermediate_Epithelial_openRRR
0.0616692	bcar1	chr18-22569227-22570126	2.88976	0.00192771	Intermediate_Epithelial	Intermediate_Epithelial_upRRG	Intermediate_Epithelial_openRRR
0.0558628	cbfb	chr18-23023942-23025240	4.4673	3.96071e-06	Intermediate_Epithelial	Intermediate_Epithelial_upRRG	Intermediate_Epithelial_openRRR
0.0823935	mef2aa	chr18-23151070-23151837	3.7781	7.90156e-05	Intermediate_Epithelial	Intermediate_Epithelial_downRRG	Intermediate_Epithelial_closeRRR
0.0674322	slco3a1	chr18-25169456-25170751	6.38366	8.64539e-11	Intermediate_Epithelial	Intermediate_Epithelial_upRRG	Intermediate_Epithelial_openRRR
0.0641385	sema4ba	chr18-25828715-25829942	2.97886	0.00144659	Intermediate_Epithelial	Intermediate_Epithelial_downRRG	Intermediate_Epithelial_openRRR
0.0513056	sema4ba	chr18-25869959-25870795	2.54741	0.00542633	Intermediate_Epithelial	Intermediate_Epithelial_downRRG	Intermediate_Epithelial_openRRR
0.0533009	ctsh	chr18-26479619-26480432	5.52424	1.65455e-08	Intermediate_Epithelial	Intermediate_Epithelial_upRRG	Intermediate_Epithelial_openRRR
0.0506634	ssr3	chr18-34487887-34489242	3.8902	5.00816e-05	Intermediate_Epithelial	Intermediate_Epithelial_upRRG	Intermediate_Epithelial_openRRR
0.0516681	ssr3	chr18-34494498-34495316	5.08778	1.81142e-07	Intermediate_Epithelial	Intermediate_Epithelial_upRRG	Intermediate_Epithelial_openRRR
0.123505	luzp2	chr18-38078138-38078856	13.6438	1.09845e-42	Intermediate_Epithelial	Intermediate_Epithelial_downRRG	Intermediate_Epithelial_closeRRR
0.0676653	fam214a	chr18-38838107-38839042	4.49888	3.41566e-06	Intermediate_Epithelial	Intermediate_Epithelial_upRRG	Intermediate_Epithelial_openRRR
0.0804934	ptk2aa	chr19-1784849-1787095	8.50278	9.25543e-18	Intermediate_Epithelial	Intermediate_Epithelial_upRRG	Intermediate_Epithelial_openRRR
0.0630783	rplp1	chr19-1784849-1787095	4.94371	3.83254e-07	Intermediate_Epithelial	Intermediate_Epithelial_upRRG	Intermediate_Epithelial_openRRR
0.100415	ptk2aa	chr19-1801044-1802077	10.1265	2.10719e-24	Intermediate_Epithelial	Intermediate_Epithelial_upRRG	Intermediate_Epithelial_openRRR
0.0720753	ptk2aa	chr19-1835827-1836958	5.72806	5.07936e-09	Intermediate_Epithelial	Intermediate_Epithelial_upRRG	Intermediate_Epithelial_openRRR
0.0513958	hivep1	chr19-3586180-3587005	2.70839	0.00338053	Intermediate_Epithelial	Intermediate_Epithelial_upRRG	Intermediate_Epithelial_openRRR
0.120123	arhgef1a	chr19-11092899-11094758	6.06659	6.53283e-10	Intermediate_Epithelial	Intermediate_Epithelial_upRRG	Intermediate_Epithelial_openRRR
0.07341	arhgef1a	chr19-11125207-11126048	2.58691	0.00484202	Intermediate_Epithelial	Intermediate_Epithelial_upRRG	Intermediate_Epithelial_openRRR
0.0711089	sema4ab	chr19-24339952-24340922	3.12841	0.000878763	Intermediate_Epithelial	Intermediate_Epithelial_upRRG	Intermediate_Epithelial_openRRR
0.0900957	sema4ab	chr19-24370208-24370967	5.56136	1.33837e-08	Intermediate_Epithelial	Intermediate_Epithelial_upRRG	Intermediate_Epithelial_openRRR
0.0581414	ptp4a3a	chr19-25104003-25105386	6.45947	5.25337e-11	Intermediate_Epithelial	Intermediate_Epithelial_downRRG	Intermediate_Epithelial_openRRR
0.0724973	jarid2b	chr19-25950235-25951394	5.26882	6.86506e-08	Intermediate_Epithelial	Intermediate_Epithelial_upRRG	Intermediate_Epithelial_openRRR
0.0696916	lpcat1	chr19-28296395-28297839	5.85662	2.36187e-09	Intermediate_Epithelial	Intermediate_Epithelial_downRRG	Intermediate_Epithelial_closeRRR
0.117833	fabp11a	chr19-32199444-32200397	8.11066	2.5173e-16	Intermediate_Epithelial	Intermediate_Epithelial_upRRG	Intermediate_Epithelial_openRRR
0.052876	ndrg1a	chr19-34982611-34983249	3.6444	0.000134007	Intermediate_Epithelial	Intermediate_Epithelial_upRRG	Intermediate_Epithelial_openRRR
0.0826167	tinagl1	chr19-41763527-41764588	5.25318	7.47489e-08	Intermediate_Epithelial	Intermediate_Epithelial_upRRG	Intermediate_Epithelial_openRRR
0.0520786	eef1a1l1	chr19-43179610-43180374	3.18125	0.000733207	Intermediate_Epithelial	Intermediate_Epithelial_downRRG	Intermediate_Epithelial_closeRRR
0.0926686	CU693379.1	chr19-48263254-48264284	3.32607	0.000440391	Intermediate_Epithelial	Intermediate_Epithelial_downRRG	Intermediate_Epithelial_openRRR
0.0529845	flrt2	chr20-11128649-11129904	3.91806	4.46317e-05	Intermediate_Epithelial	Intermediate_Epithelial_upRRG	Intermediate_Epithelial_openRRR
0.0870674	flrt2	chr20-11226444-11227817	6.07965	6.02216e-10	Intermediate_Epithelial	Intermediate_Epithelial_upRRG	Intermediate_Epithelial_openRRR
0.0624238	snx17	chr20-19493755-19494438	5.00183	2.83947e-07	Intermediate_Epithelial	Intermediate_Epithelial_upRRG	Intermediate_Epithelial_openRRR
0.0571112	lnx1	chr20-22668851-22669289	3.14119	0.000841326	Intermediate_Epithelial	Intermediate_Epithelial_downRRG	Intermediate_Epithelial_closeRRR
0.0744192	bach2b	chr20-24066378-24067308	3.49327	0.000238572	Intermediate_Epithelial	Intermediate_Epithelial_downRRG	Intermediate_Epithelial_closeRRR
0.0768829	epha7	chr20-25001712-25002895	2.65984	0.00390891	Intermediate_Epithelial	Intermediate_Epithelial_upRRG	Intermediate_Epithelial_openRRR
0.0535468	moxd1	chr20-25256680-25257493	6.89245	2.74205e-12	Intermediate_Epithelial	Intermediate_Epithelial_downRRG	Intermediate_Epithelial_openRRR
0.0725528	gmds	chr20-26797256-26798073	2.47832	0.00660016	Intermediate_Epithelial	Intermediate_Epithelial_downRRG	Intermediate_Epithelial_closeRRR
0.0580036	rhov	chr20-28347868-28348488	4.02455	2.8542e-05	Intermediate_Epithelial	Intermediate_Epithelial_upRRG	Intermediate_Epithelial_openRRR
0.0688469	rhov	chr20-28459476-28460623	4.63468	1.78745e-06	Intermediate_Epithelial	Intermediate_Epithelial_upRRG	Intermediate_Epithelial_openRRR
0.0916152	sipa1l1	chr20-28706041-28706629	7.21957	2.60763e-13	Intermediate_Epithelial	Intermediate_Epithelial_upRRG	Intermediate_Epithelial_openRRR
0.0655911	sipa1l1	chr20-28717073-28718426	3.36792	0.000378682	Intermediate_Epithelial	Intermediate_Epithelial_upRRG	Intermediate_Epithelial_openRRR
0.0670669	fam102bb	chr20-33776502-33777458	5.26708	6.93046e-08	Intermediate_Epithelial	Intermediate_Epithelial_upRRG	Intermediate_Epithelial_openRRR
0.0655109	ptgs2b	chr20-34110628-34111888	3.23258	0.000613391	Intermediate_Epithelial	Intermediate_Epithelial_downRRG	Intermediate_Epithelial_openRRR
0.0572815	niban1a	chr20-34316491-34317630	2.57372	0.00503061	Intermediate_Epithelial	Intermediate_Epithelial_downRRG	Intermediate_Epithelial_closeRRR
0.113601	niban1a	chr20-34402267-34403145	6.09855	5.35176e-10	Intermediate_Epithelial	Intermediate_Epithelial_downRRG	Intermediate_Epithelial_closeRRR
0.053404	clu	chr20-39187546-39188806	3.47835	0.000252255	Intermediate_Epithelial	Intermediate_Epithelial_upRRG	Intermediate_Epithelial_openRRR
0.160445	nkain2	chr20-40117747-40120076	14.7006	3.1966e-49	Intermediate_Epithelial	Intermediate_Epithelial_upRRG	Intermediate_Epithelial_openRRR
0.0895136	fosab	chr20-46551571-46552225	9.14314	3.03336e-20	Intermediate_Epithelial	Intermediate_Epithelial_downRRG	Intermediate_Epithelial_closeRRR
0.0548169	jdp2b	chr20-46551571-46552225	5.77765	3.78753e-09	Intermediate_Epithelial	Intermediate_Epithelial_downRRG	Intermediate_Epithelial_closeRRR
0.0719644	scamp1	chr21-3760317-3761652	8.47137	1.2126e-17	Intermediate_Epithelial	Intermediate_Epithelial_upRRG	Intermediate_Epithelial_openRRR
0.0609595	col5a1	chr21-6470507-6471382	3.40902	0.000325988	Intermediate_Epithelial	Intermediate_Epithelial_upRRG	Intermediate_Epithelial_openRRR
0.0525935	ell2	chr21-11746994-11747641	4.75121	1.01103e-06	Intermediate_Epithelial	Intermediate_Epithelial_upRRG	Intermediate_Epithelial_openRRR
0.057076	glrx	chr21-11746994-11747641	5.67015	7.13377e-09	Intermediate_Epithelial	Intermediate_Epithelial_upRRG	Intermediate_Epithelial_openRRR
0.0859604	rai14	chr21-19554070-19555176	3.9656	3.66054e-05	Intermediate_Epithelial	Intermediate_Epithelial_upRRG	Intermediate_Epithelial_openRRR
0.0859587	rai14	chr21-19565942-19567274	4.44133	4.47021e-06	Intermediate_Epithelial	Intermediate_Epithelial_upRRG	Intermediate_Epithelial_openRRR
0.112355	lifrb	chr21-21229613-21230625	4.84271	6.40404e-07	Intermediate_Epithelial	Intermediate_Epithelial_upRRG	Intermediate_Epithelial_openRRR
0.0845241	gig2l	chr21-22687995-22690823	6.6598	1.37104e-11	Intermediate_Epithelial	Intermediate_Epithelial_upRRG	Intermediate_Epithelial_closeRRR
0.0809346	gig2e	chr21-22687995-22690823	12.0283	1.26183e-33	Intermediate_Epithelial	Intermediate_Epithelial_upRRG	Intermediate_Epithelial_closeRRR
0.0619221	arhgap42a	chr21-22751829-22752880	4.44981	4.29738e-06	Intermediate_Epithelial	Intermediate_Epithelial_upRRG	Intermediate_Epithelial_openRRR
0.121789	zbtb16a	chr21-23282044-23283497	7.0689	7.80851e-13	Intermediate_Epithelial	Intermediate_Epithelial_downRRG	Intermediate_Epithelial_closeRRR
0.0701047	bicdl2l	chr21-25695239-25696976	6.11197	4.92053e-10	Intermediate_Epithelial	Intermediate_Epithelial_downRRG	Intermediate_Epithelial_closeRRR
0.107917	klf8	chr21-38085789-38086958	6.97348	1.54594e-12	Intermediate_Epithelial	Intermediate_Epithelial_downRRG	Intermediate_Epithelial_closeRRR
0.0617742	klf5l	chr21-38085789-38086958	3.62525	0.00014434	Intermediate_Epithelial	Intermediate_Epithelial_downRRG	Intermediate_Epithelial_closeRRR
0.0898967	slco2b1	chr21-40167639-40168415	6.55895	2.7094e-11	Intermediate_Epithelial	Intermediate_Epithelial_downRRG	Intermediate_Epithelial_closeRRR
0.0795229	si:dkey-223p19.1	chr21-45437825-45438772	4.50729	3.28299e-06	Intermediate_Epithelial	Intermediate_Epithelial_downRRG	Intermediate_Epithelial_closeRRR
0.173563	elf3	chr22-665558-666612	7.95893	8.67654e-16	Intermediate_Epithelial	Intermediate_Epithelial_downRRG	Intermediate_Epithelial_openRRR
0.0559476	si:zfos-943e10.1	chr22-3296982-3297556	5.40532	3.23473e-08	Intermediate_Epithelial	Intermediate_Epithelial_downRRG	Intermediate_Epithelial_closeRRR
0.0607859	si:zfos-943e10.1	chr22-3300243-3300771	6.78168	5.93949e-12	Intermediate_Epithelial	Intermediate_Epithelial_downRRG	Intermediate_Epithelial_closeRRR
0.0796897	calr3a	chr22-4695527-4696273	4.63952	1.74609e-06	Intermediate_Epithelial	Intermediate_Epithelial_upRRG	Intermediate_Epithelial_openRRR
0.0517779	ecm2	chr22-10504958-10506440	2.76004	0.00288976	Intermediate_Epithelial	Intermediate_Epithelial_upRRG	Intermediate_Epithelial_openRRR
0.122272	mgat5	chr22-11977062-11977957	4.66431	1.54824e-06	Intermediate_Epithelial	Intermediate_Epithelial_upRRG	Intermediate_Epithelial_openRRR
0.0941771	mgat5	chr22-11984406-11985476	3.90495	4.71231e-05	Intermediate_Epithelial	Intermediate_Epithelial_upRRG	Intermediate_Epithelial_closeRRR
0.074115	rnd3a	chr22-12444180-12445489	6.17795	3.24699e-10	Intermediate_Epithelial	Intermediate_Epithelial_downRRG	Intermediate_Epithelial_closeRRR
0.0632337	tjp3	chr22-17714579-17715191	4.44025	4.49262e-06	Intermediate_Epithelial	Intermediate_Epithelial_downRRG	Intermediate_Epithelial_openRRR
0.0631032	SBNO2	chr22-17714579-17715191	4.59419	2.17214e-06	Intermediate_Epithelial	Intermediate_Epithelial_downRRG	Intermediate_Epithelial_openRRR
0.0612951	ell	chr22-20928852-20929680	5.48468	2.07109e-08	Intermediate_Epithelial	Intermediate_Epithelial_downRRG	Intermediate_Epithelial_closeRRR
0.0600683	pdgfba	chr22-29276397-29277381	6.14257	4.05983e-10	Intermediate_Epithelial	Intermediate_Epithelial_downRRG	Intermediate_Epithelial_closeRRR
0.0616626	pdgfba	chr22-29402479-29403369	5.6495	8.04567e-09	Intermediate_Epithelial	Intermediate_Epithelial_downRRG	Intermediate_Epithelial_closeRRR
0.0749615	slc6a6b	chr22-31593419-31594759	4.53391	2.89512e-06	Intermediate_Epithelial	Intermediate_Epithelial_downRRG	Intermediate_Epithelial_closeRRR
0.0565628	pfn2	chr22-35170166-35170723	4.84795	6.23733e-07	Intermediate_Epithelial	Intermediate_Epithelial_upRRG	Intermediate_Epithelial_openRRR
0.196798	nppc	chr22-38620936-38621990	8.02641	5.01848e-16	Intermediate_Epithelial	Intermediate_Epithelial_upRRG	Intermediate_Epithelial_openRRR
0.161386	nppc	chr22-38682857-38685005	10.6638	7.5191e-27	Intermediate_Epithelial	Intermediate_Epithelial_upRRG	Intermediate_Epithelial_openRRR
0.0506661	cdh26.2	chr23-932173-932693	6.71012	9.72307e-12	Intermediate_Epithelial	Intermediate_Epithelial_downRRG	Intermediate_Epithelial_openRRR
0.0678336	b4galt5	chr23-3987381-3988475	2.89792	0.00187823	Intermediate_Epithelial	Intermediate_Epithelial_downRRG	Intermediate_Epithelial_closeRRR
0.0686646	osbpl2b	chr23-9521948-9523175	3.19662	0.000695252	Intermediate_Epithelial	Intermediate_Epithelial_downRRG	Intermediate_Epithelial_closeRRR
0.0533026	plxnb1a	chr23-10062439-10063093	4.64557	1.69566e-06	Intermediate_Epithelial	Intermediate_Epithelial_upRRG	Intermediate_Epithelial_openRRR
0.0788928	krt5	chr23-10145473-10146030	4.50907	3.25555e-06	Intermediate_Epithelial	Intermediate_Epithelial_upRRG	Intermediate_Epithelial_openRRR
0.0852462	krt8	chr23-10339985-10341315	4.86639	5.68273e-07	Intermediate_Epithelial	Intermediate_Epithelial_upRRG	Intermediate_Epithelial_openRRR
0.0919124	krt8	chr23-10347536-10348891	8.98213	1.32782e-19	Intermediate_Epithelial	Intermediate_Epithelial_upRRG	Intermediate_Epithelial_openRRR
0.0710123	pdzrn3a	chr23-10848787-10849495	6.62209	1.7708e-11	Intermediate_Epithelial	Intermediate_Epithelial_upRRG	Intermediate_Epithelial_openRRR
0.0592729	pdzrn3a	chr23-10913535-10914554	7.07935	7.24178e-13	Intermediate_Epithelial	Intermediate_Epithelial_upRRG	Intermediate_Epithelial_openRRR
0.0554217	ppdpfb	chr23-17412332-17413766	3.95557	3.81755e-05	Intermediate_Epithelial	Intermediate_Epithelial_upRRG	Intermediate_Epithelial_openRRR
0.0706266	agrn	chr23-23464256-23465614	3.88488	5.11901e-05	Intermediate_Epithelial	Intermediate_Epithelial_upRRG	Intermediate_Epithelial_openRRR
0.0596053	agrn	chr23-23511059-23511976	3.08591	0.00101466	Intermediate_Epithelial	Intermediate_Epithelial_upRRG	Intermediate_Epithelial_openRRR
0.0696321	galnt6	chr23-26775323-26776009	6.98057	1.46988e-12	Intermediate_Epithelial	Intermediate_Epithelial_downRRG	Intermediate_Epithelial_closeRRR
0.0588182	osbpl2a	chr23-30967694-30968686	6.14755	3.93433e-10	Intermediate_Epithelial	Intermediate_Epithelial_upRRG	Intermediate_Epithelial_openRRR
0.0702934	si:ch211-197l9.2	chr23-30962653-30963796	5.47216	2.22287e-08	Intermediate_Epithelial	Intermediate_Epithelial_upRRG	Intermediate_Epithelial_openRRR
0.105752	si:ch211-197l9.2	chr23-30967694-30968686	7.81139	2.82809e-15	Intermediate_Epithelial	Intermediate_Epithelial_upRRG	Intermediate_Epithelial_openRRR
0.102539	plxna2	chr23-32942917-32945435	4.38212	5.87643e-06	Intermediate_Epithelial	Intermediate_Epithelial_upRRG	Intermediate_Epithelial_openRRR
0.114844	itga5	chr23-33464584-33465177	5.53426	1.56269e-08	Intermediate_Epithelial	Intermediate_Epithelial_upRRG	Intermediate_Epithelial_openRRR
0.146244	itga5	chr23-33470468-33471539	6.03797	7.80315e-10	Intermediate_Epithelial	Intermediate_Epithelial_upRRG	Intermediate_Epithelial_openRRR
0.128985	itga5	chr23-33610845-33611796	4.3437	7.00519e-06	Intermediate_Epithelial	Intermediate_Epithelial_upRRG	Intermediate_Epithelial_openRRR
0.0633674	rarga	chr23-35901173-35902115	4.14862	1.6724e-05	Intermediate_Epithelial	Intermediate_Epithelial_downRRG	Intermediate_Epithelial_closeRRR
0.099469	plekhg5b	chr23-37591565-37592547	3.61329	0.000151167	Intermediate_Epithelial	Intermediate_Epithelial_upRRG	Intermediate_Epithelial_openRRR
0.0898348	tshz2	chr23-38448034-38449153	6.49834	4.06046e-11	Intermediate_Epithelial	Intermediate_Epithelial_upRRG	Intermediate_Epithelial_openRRR
0.0911373	src	chr23-39425264-39426268	4.45213	4.25122e-06	Intermediate_Epithelial	Intermediate_Epithelial_upRRG	Intermediate_Epithelial_openRRR
0.0781778	src	chr23-39427153-39427780	5.10829	1.62544e-07	Intermediate_Epithelial	Intermediate_Epithelial_upRRG	Intermediate_Epithelial_openRRR
0.115678	LO017845.1	chr23-40912755-40913483	10.7492	2.99013e-27	Intermediate_Epithelial	Intermediate_Epithelial_upRRG	Intermediate_Epithelial_openRRR
0.0538725	reps2	chr23-40908393-40909441	4.9454	3.79934e-07	Intermediate_Epithelial	Intermediate_Epithelial_upRRG	Intermediate_Epithelial_openRRR
[truncated: 16,805 more rows]
[truncated: 10 more columns]

## Sheet: Table S4D
Table S4 Peak-to-gene links and enhancer validation record
[truncated: 13 more rows]
