# Supplementary material for: Common and specific gene regulatory programs in zebrafish caudal fin regeneration at single-cell resolution
Source: HighWire-hosted journal article supplement (doi:10.1101/gr.279372.124), 2025-01-01
Supplement: Supplemental_Table_S5.xlsx [file Supplemental_Table_S5.xlsx]

## Sheet: Table S5A
Table S5. TF-target inferences across cell types and stages
A. TF-target inference in SE across stages
PtoG_Index	Peak	PtoG_Class	PtoG_cor	Target	Motif	Footprint_region	Footprint_Mid	Footprint_Left_del	Footprint_Right_del	TF	TFexp_Motif_Cor	TF_Gene	GG_grnboost2_Score	GG_Correlation	TF_log2fc_vs0dpa	Target_log2fc_vs0dpa	TF_AvgExp_log1p	Target_AvgExp_log1p	peak_log2fc_vs0dpa	peak_AvgExp	ct_stage
aacs#chr5:18894307-18894901	chr5:18894307-18894901	Body	0.07	aacs	MA1128.1	chr5:18894544-18894556	0.189619	0.0938519	0.581772	fosl1a	0.122265	fosl1a->aacs	7.47456	0.115204	0	0	2.74651	1.63131	0	3.20579	Superficial_Epithelial_0dpa
aacs#chr5:18894307-18894901	chr5:18894307-18894901	Body	0.07	aacs	MA1128.1	chr5:18894555-18894567	-0.271412	0.566813	1.20038	fosl1a	0.122265	fosl1a->aacs	7.47456	0.115204	0	0	2.74651	1.63131	0	3.20579	Superficial_Epithelial_0dpa
aacs#chr5:18894307-18894901	chr5:18894307-18894901	Body	0.07	aacs	MA1137.1	chr5:18894544-18894556	0.189619	0.0938519	0.581772	fosl1a	0.123797	fosl1a->aacs	7.47456	0.115204	0	0	2.74651	1.63131	0	3.20579	Superficial_Epithelial_0dpa
aacs#chr5:18894307-18894901	chr5:18894307-18894901	Body	0.07	aacs	MA1142.1	chr5:18894545-18894554	-0.0887993	0.514658	0.0692814	fosl1a	0.132058	fosl1a->aacs	7.47456	0.115204	0	0	2.74651	1.63131	0	3.20579	Superficial_Epithelial_0dpa
aacs#chr5:18894307-18894901	chr5:18894307-18894901	Body	0.07	aacs	MA1515.1	chr5:18894437-18894447	-0.138252	0.369161	0.549515	klf2b	0.107486	klf2b->aacs	2.54975	0.0962769	0	0	1.42664	1.63131	0	3.20579	Superficial_Epithelial_0dpa
aacs#chr5:18894307-18894901	chr5:18894307-18894901	Body	0.07	aacs	MA0477.2	chr5:18894544-18894556	0.189619	0.0938519	0.581772	fosl1a	0.126437	fosl1a->aacs	7.47456	0.115204	0	0	2.74651	1.63131	0	3.20579	Superficial_Epithelial_0dpa
aacs#chr5:18894307-18894901	chr5:18894307-18894901	Body	0.07	aacs	MA0477.2	chr5:18894544-18894556	0.189619	0.0938519	0.581772	fosl1a	0.126437	fosl1a->aacs	7.47456	0.115204	0	0	2.74651	1.63131	0	3.20579	Superficial_Epithelial_0dpa
aacs#chr5:18894307-18894901	chr5:18894307-18894901	Body	0.07	aacs	MA1633.2	chr5:18894546-18894554	-0.147191	0.570072	0.135211	bach1b	0.0601907	bach1b->aacs	13.7987	0.173469	0	0	0.925602	1.63131	0	3.20579	Superficial_Epithelial_0dpa
aak1a#chr8:48965386-48966817	chr8:48965386-48966817	TSS	0	aak1a	MA0478.1	chr8:48965910-48965920	0.238593	0.162589	0.53631	fosl2	0.0934041	fosl2->aak1a	6.02308	0.0828457	0	0	1.62846	1.21272	0	1.96932	Superficial_Epithelial_0dpa
aak1a#chr8:48965386-48966817	chr8:48965386-48966817	TSS	0	aak1a	MA0478.1	chr8:48965912-48965922	-0.019645	0.406367	0.980583	fosl2	0.0934041	fosl2->aak1a	6.02308	0.0828457	0	0	1.62846	1.21272	0	1.96932	Superficial_Epithelial_0dpa
aak1a#chr8:48965386-48966817	chr8:48965386-48966817	TSS	0	aak1a	MA1130.1	chr8:48965911-48965922	-0.0180079	0.451737	0.847038	fosl2	0.0837069	fosl2->aak1a	6.02308	0.0828457	0	0	1.62846	1.21272	0	1.96932	Superficial_Epithelial_0dpa
aak1a#chr8:48965386-48966817	chr8:48965386-48966817	TSS	0	aak1a	MA1138.1	chr8:48965911-48965920	0.262452	0.209609	0.351523	fosl2	0.084033	fosl2->aak1a	6.02308	0.0828457	0	0	1.62846	1.21272	0	1.96932	Superficial_Epithelial_0dpa
aak1a#chr8:48965386-48966817	chr8:48965386-48966817	TSS	0	aak1a	MA1138.1	chr8:48965912-48965921	0.0150203	0.486908	0.878887	fosl2	0.084033	fosl2->aak1a	6.02308	0.0828457	0	0	1.62846	1.21272	0	1.96932	Superficial_Epithelial_0dpa
aak1a#chr8:48965386-48966817	chr8:48965386-48966817	TSS	0	aak1a	MA1144.1	chr8:48965911-48965920	0.262452	0.209609	0.351523	fosl2	0.0824373	fosl2->aak1a	6.02308	0.0828457	0	0	1.62846	1.21272	0	1.96932	Superficial_Epithelial_0dpa
aak1a#chr8:48965386-48966817	chr8:48965386-48966817	TSS	0	aak1a	MA1144.1	chr8:48965912-48965921	0.0150203	0.486908	0.878887	fosl2	0.0824373	fosl2->aak1a	6.02308	0.0828457	0	0	1.62846	1.21272	0	1.96932	Superficial_Epithelial_0dpa
abca1b#chr14:6449474-6450368	chr14:6449474-6450368	Body	0.186	abca1b	MA0624.2	chr14:6449866-6449877	-0.0430606	0.0554517	0.0790946	nfatc1	0.0822448	nfatc1->abca1b	4.48003	0.116771	0	0	0.0105534	0.0747825	0	0.20622	Superficial_Epithelial_0dpa
abhd17b#chr5:25733093-25735055	chr5:25733093-25735055	TSS	0	abhd17b	MA1128.1	chr5:25734940-25734952	-0.307211	0.577108	0.906284	fosl1a	0.122265	fosl1a->abhd17b	1.82855	0.0675745	0	0	2.74651	1.08448	0	1.88449	Superficial_Epithelial_0dpa
abi1a#chr24:5937979-5938707	chr24:5937979-5938707	Body	0.064	abi1a	MA0525.2	chr24:5938404-5938421	-0.616012	0.9169	0.850283	tp63	0.180472	tp63->abi1a	3.62402	0.089379	0	0	0.439364	1.2419	0	1.67657	Superficial_Epithelial_0dpa
abi1a#chr24:5937979-5938707	chr24:5937979-5938707	Body	0.064	abi1a	MA1101.2	chr24:5938362-5938380	-0.308103	2.0957	0.578357	bach2b	0.0657534	bach2b->abi1a	11.4598	0.123904	0	0	0.209666	1.2419	0	1.67657	Superficial_Epithelial_0dpa
abl2#chr8:14970134-14971037	chr8:14970134-14971037	Body	0.088	abl2	MA0059.1	chr8:14970518-14970528	-0.0825897	0.073641	0.0922254	myca	0.0678733	myca->abl2	2.94678	0.0764404	0	0	0.0350607	0.330507	0	0.605907	Superficial_Epithelial_0dpa
abl2#chr8:14970134-14971037	chr8:14970134-14971037	Body	0.088	abl2	MA0147.3	chr8:14970518-14970529	-0.0791234	0.0661596	0.10998	myca	0.0687634	myca->abl2	2.94678	0.0764404	0	0	0.0350607	0.330507	0	0.605907	Superficial_Epithelial_0dpa
abl2#chr8:14970134-14971037	chr8:14970134-14971037	Body	0.088	abl2	MA0147.3	chr8:14970518-14970529	-0.0791234	0.0661596	0.10998	mycb	0.052455	mycb->abl2	1.86803	0.0553349	0	0	0.281657	0.330507	0	0.605907	Superficial_Epithelial_0dpa
abl2#chr8:14970134-14971037	chr8:14970134-14971037	Body	0.088	abl2	MA0147.3	chr8:14970518-14970529	-0.0791234	0.0661596	0.10998	myca	0.0687634	myca->abl2	2.94678	0.0764404	0	0	0.0350607	0.330507	0	0.605907	Superficial_Epithelial_0dpa
abl2#chr8:14970134-14971037	chr8:14970134-14971037	Body	0.088	abl2	MA0147.3	chr8:14970518-14970529	-0.0791234	0.0661596	0.10998	mycb	0.052455	mycb->abl2	1.86803	0.0553349	0	0	0.281657	0.330507	0	0.605907	Superficial_Epithelial_0dpa
abl2#chr8:14970134-14971037	chr8:14970134-14971037	Body	0.088	abl2	MA0522.3	chr8:14970519-14970529	-0.071322	0.0605374	0.086133	tcf3a	0.0820155	tcf3a->abl2	10.059	0.107313	0	0	0.450357	0.330507	0	0.605907	Superficial_Epithelial_0dpa
abl2#chr8:14970134-14971037	chr8:14970134-14971037	Body	0.088	abl2	MA0522.3	chr8:14970518-14970528	-0.0825897	0.073641	0.0922254	tcf3a	0.0820155	tcf3a->abl2	10.059	0.107313	0	0	0.450357	0.330507	0	0.605907	Superficial_Epithelial_0dpa
ABR#chr5:62374183-62375514	chr5:62374183-62375514	TSS	0.124	ABR	MA1527.1	chr5:62374705-62374721	-0.0833219	0.196478	0.056552	nfic	0.072754	nfic->ABR	1.67562	0.102019	0	0	0.510769	0.0827729	0	0.610775	Superficial_Epithelial_0dpa
abtb2b#chr25:24616333-24617075	chr25:24616333-24617075	Body	0.202	abtb2b	MA0480.2	chr25:24616738-24616748	-0.392989	0.818594	0.389593	foxo1a	0.0795932	foxo1a->abtb2b	1.29458	0.079109	0	0	2.13262	0.822892	0	1.49801	Superficial_Epithelial_0dpa
abtb2b#chr25:24632040-24633413	chr25:24632040-24633413	Body	0.145	abtb2b	MA0525.2	chr25:24633013-24633030	-0.0603806	0.0695577	0.0716056	tp63	0.180472	tp63->abtb2b	10.275	0.159884	0	0	0.439364	0.822892	0	0.71345	Superficial_Epithelial_0dpa
abtb2b#chr25:24616333-24617075	chr25:24616333-24617075	TSS	0.202	abtb2b	MA0480.2	chr25:24616738-24616748	-0.392989	0.818594	0.389593	foxo1a	0.0795932	foxo1a->abtb2b	1.29458	0.079109	0	0	2.13262	0.822892	0	1.49801	Superficial_Epithelial_0dpa
abtb2b#chr25:24617613-24619374	chr25:24617613-24619374	TSS	0.154	abtb2b	MA0759.2	chr25:24617723-24617733	-0.00888074	0.137637	0.290592	elk3	0.0686326	elk3->abtb2b	4.24617	0.0967107	0	0	0.322853	0.822892	0	1.55436	Superficial_Epithelial_0dpa
acads#chr10:44016902-44020056	chr10:44016902-44020056	TSS	0	acads	MA0517.1	chr10:44017103-44017117	-0.0484504	0.023415	0.120347	stat1b	0.151583	stat1b->acads	1.7873	0.0326533	0	0	0.572188	0.0281661	0	1.05943	Superficial_Epithelial_0dpa
acap1#chr7:20102330-20104162	chr7:20102330-20104162	TSS	0	acap1	MA0058.3	chr7:20103716-20103725	-0.191302	0.526209	1.09516	max	0.0781341	max->acap1	7.6662	0.0747197	0	0	0.485417	0.584051	0	1.9079	Superficial_Epithelial_0dpa
aclya#chr3:17951179-17952380	chr3:17951179-17952380	TSS	0	aclya	MA0591.1	chr3:17952020-17952034	-0.12097	0.114706	5.27637e-05	bach1b	0.0525138	bach1b->aclya	4.9319	0.0747243	0	0	0.925602	0.665195	0	2.08473	Superficial_Epithelial_0dpa
acot7#chr8:46893639-46895691	chr8:46893639-46895691	TSS	0	acot7	MA1131.1	chr8:46894399-46894409	0.0614303	0.473996	0.27856	fosl2	0.0630162	fosl2->acot7	3.58337	0.0704123	0	0	1.62846	0.868307	0	1.31057	Superficial_Epithelial_0dpa
acp6#chr9:30477959-30479182	chr9:30477959-30479182	TSS	0	acp6	MA0050.3	chr9:30478752-30478766	-0.00318575	0.883715	-0.175049	irf1b	0.108859	irf1b->acp6	1.12671	0.0344486	0	0	0.586434	0.0930126	0	1.56349	Superficial_Epithelial_0dpa
acsbg2#chr8:20140520-20141677	chr8:20140520-20141677	Body	0.054	acsbg2	MA0522.3	chr8:20140623-20140633	-0.214309	0.738984	-0.0251084	tcf3a	0.0820155	tcf3a->acsbg2	1.1522	0.0526018	0	0	0.450357	1.02291	0	2.58665	Superficial_Epithelial_0dpa
acsbg2#chr8:20175759-20177364	chr8:20175759-20177364	Body	0.066	acsbg2	MA1136.1	chr8:20177053-20177062	-0.10352	0.289065	0.204628	junba	0.0510403	junba->acsbg2	2.71371	0.0323558	0	0	1.93563	1.02291	0	1.55741	Superficial_Epithelial_0dpa
acsbg2#chr8:20175759-20177364	chr8:20175759-20177364	Body	0.066	acsbg2	MA1136.1	chr8:20177053-20177062	-0.10352	0.289065	0.204628	junba	0.0510403	junba->acsbg2	2.71371	0.0323558	0	0	1.93563	1.02291	0	1.55741	Superficial_Epithelial_0dpa
acsbg2#chr8:20121554-20122499	chr8:20121554-20122499	Inter	0.058	acsbg2	MA0522.3	chr8:20122108-20122118	0.0769424	-0.262116	1.11253	tcf3a	0.0820155	tcf3a->acsbg2	1.1522	0.0526018	0	0	0.450357	1.02291	0	1.34495	Superficial_Epithelial_0dpa
acsbg2#chr8:20140520-20141677	chr8:20140520-20141677	TSS	0.054	acsbg2	MA0522.3	chr8:20140623-20140633	-0.214309	0.738984	-0.0251084	tcf3a	0.0820155	tcf3a->acsbg2	1.1522	0.0526018	0	0	0.450357	1.02291	0	2.58665	Superficial_Epithelial_0dpa
acsl3a#chr15:42994107-42995740	chr15:42994107-42995740	TSS	0	acsl3a	MA0609.2	chr15:42995223-42995238	-0.0587616	-0.0527086	0.166318	crema	0.0998319	crema->acsl3a	4.06227	0.0349062	0	0	1.34056	0.253859	0	5.33547	Superficial_Epithelial_0dpa
acsl3a#chr15:42994107-42995740	chr15:42994107-42995740	TSS	0	acsl3a	MA0609.2	chr15:42995223-42995238	-0.0587616	-0.0527086	0.166318	crema	0.0998319	crema->acsl3a	4.06227	0.0349062	0	0	1.34056	0.253859	0	5.33547	Superficial_Epithelial_0dpa
acsl4a#chr14:28438659-28439670	chr14:28438659-28439670	TSS	0	acsl4a	MA1128.1	chr14:28439591-28439603	0.0391473	0.213695	-0.00291392	fosl1a	0.122265	fosl1a->acsl4a	1.7875	0.0445917	0	0	2.74651	0.664349	0	1.57812	Superficial_Epithelial_0dpa
acsl4a#chr14:28438659-28439670	chr14:28438659-28439670	TSS	0	acsl4a	MA1137.1	chr14:28439591-28439603	0.0391473	0.213695	-0.00291392	fosl1a	0.123797	fosl1a->acsl4a	1.7875	0.0445917	0	0	2.74651	0.664349	0	1.57812	Superficial_Epithelial_0dpa
acsl4a#chr14:28438659-28439670	chr14:28438659-28439670	TSS	0	acsl4a	MA1137.1	chr14:28439591-28439603	0.0391473	0.213695	-0.00291392	fosl1a	0.123797	fosl1a->acsl4a	1.7875	0.0445917	0	0	2.74651	0.664349	0	1.57812	Superficial_Epithelial_0dpa
acsl4a#chr14:28438659-28439670	chr14:28438659-28439670	TSS	0	acsl4a	MA1142.1	chr14:28439593-28439602	0.0276114	0.351428	-0.0242374	fosl1a	0.132058	fosl1a->acsl4a	1.7875	0.0445917	0	0	2.74651	0.664349	0	1.57812	Superficial_Epithelial_0dpa
acsl4a#chr14:28438659-28439670	chr14:28438659-28439670	TSS	0	acsl4a	MA0477.2	chr14:28439591-28439603	0.0391473	0.213695	-0.00291392	fosl1a	0.126437	fosl1a->acsl4a	1.7875	0.0445917	0	0	2.74651	0.664349	0	1.57812	Superficial_Epithelial_0dpa
acsl4a#chr14:28438659-28439670	chr14:28438659-28439670	TSS	0	acsl4a	MA0477.2	chr14:28439591-28439603	0.0391473	0.213695	-0.00291392	fosl1a	0.126437	fosl1a->acsl4a	1.7875	0.0445917	0	0	2.74651	0.664349	0	1.57812	Superficial_Epithelial_0dpa
acta2#chr12:17105786-17106941	chr12:17105786-17106941	TSS	0	acta2	MA0517.1	chr12:17106093-17106107	0.156547	0.576062	-0.0146786	stat1b	0.151583	stat1b->acta2	1.46044	0.0404396	0	0	0.572188	0.0225597	0	2.28562	Superficial_Epithelial_0dpa
actb1#chr1:8646567-8650289	chr1:8646567-8650289	Body	0.137	actb1	MA1131.1	chr1:8649518-8649528	0.0274354	0.214939	0.133764	fosl2	0.0630162	fosl2->actb1	9.37334	0.186945	0	0	1.62846	3.62225	0	4.0785	Superficial_Epithelial_0dpa
actb1#chr1:8653391-8656525	chr1:8653391-8656525	TSS	0.091	actb1	MA0478.1	chr1:8654992-8655002	-0.643326	0.801669	1.05837	fosl2	0.0934041	fosl2->actb1	9.37334	0.186945	0	0	1.62846	3.62225	0	2.91119	Superficial_Epithelial_0dpa
actb1#chr1:8653391-8656525	chr1:8653391-8656525	TSS	0.091	actb1	MA0478.1	chr1:8655848-8655858	-0.235087	-0.0261643	1.86701	fosl2	0.0934041	fosl2->actb1	9.37334	0.186945	0	0	1.62846	3.62225	0	2.91119	Superficial_Epithelial_0dpa
actb1#chr1:8653391-8656525	chr1:8653391-8656525	TSS	0.091	actb1	MA0478.1	chr1:8654994-8655004	-0.384377	0.335659	0.893607	fosl2	0.0934041	fosl2->actb1	9.37334	0.186945	0	0	1.62846	3.62225	0	2.91119	Superficial_Epithelial_0dpa
actb1#chr1:8653391-8656525	chr1:8653391-8656525	TSS	0.091	actb1	MA0478.1	chr1:8655850-8655860	0.156215	-0.563734	1.54937	fosl2	0.0934041	fosl2->actb1	9.37334	0.186945	0	0	1.62846	3.62225	0	2.91119	Superficial_Epithelial_0dpa
actb1#chr1:8653391-8656525	chr1:8653391-8656525	TSS	0.091	actb1	MA1128.1	chr1:8654992-8655004	-0.911721	0.793938	1.80616	fosl1a	0.122265	fosl1a->actb1	4.74017	0.098046	0	0	2.74651	3.62225	0	2.91119	Superficial_Epithelial_0dpa
actb1#chr1:8653391-8656525	chr1:8653391-8656525	TSS	0.091	actb1	MA1128.1	chr1:8655848-8655860	-0.13677	-0.126359	1.74549	fosl1a	0.122265	fosl1a->actb1	4.74017	0.098046	0	0	2.74651	3.62225	0	2.91119	Superficial_Epithelial_0dpa
actb1#chr1:8653391-8656525	chr1:8653391-8656525	TSS	0.091	actb1	MA1130.1	chr1:8654992-8655003	-0.625095	0.713801	1.01753	fosl2	0.0837069	fosl2->actb1	9.37334	0.186945	0	0	1.62846	3.62225	0	2.91119	Superficial_Epithelial_0dpa
actb1#chr1:8653391-8656525	chr1:8653391-8656525	TSS	0.091	actb1	MA1130.1	chr1:8655848-8655859	-0.215726	0.0260643	1.83634	fosl2	0.0837069	fosl2->actb1	9.37334	0.186945	0	0	1.62846	3.62225	0	2.91119	Superficial_Epithelial_0dpa
actb1#chr1:8653391-8656525	chr1:8653391-8656525	TSS	0.091	actb1	MA1130.1	chr1:8654993-8655004	-0.986505	1.04192	1.54647	fosl2	0.0837069	fosl2->actb1	9.37334	0.186945	0	0	1.62846	3.62225	0	2.91119	Superficial_Epithelial_0dpa
actb1#chr1:8653391-8656525	chr1:8653391-8656525	TSS	0.091	actb1	MA1131.1	chr1:8653775-8653785	0.172424	0.208866	0.543606	fosl2	0.0630162	fosl2->actb1	9.37334	0.186945	0	0	1.62846	3.62225	0	2.91119	Superficial_Epithelial_0dpa
actb1#chr1:8653391-8656525	chr1:8653391-8656525	TSS	0.091	actb1	MA1131.1	chr1:8653776-8653786	0.0265858	0.281971	0.794944	fosl2	0.0630162	fosl2->actb1	9.37334	0.186945	0	0	1.62846	3.62225	0	2.91119	Superficial_Epithelial_0dpa
actb1#chr1:8653391-8656525	chr1:8653391-8656525	TSS	0.091	actb1	MA1136.1	chr1:8653776-8653785	0.391849	-0.056963	0.433714	junba	0.0510403	junba->actb1	4.50867	0.0952458	0	0	1.93563	3.62225	0	2.91119	Superficial_Epithelial_0dpa
actb1#chr1:8653391-8656525	chr1:8653391-8656525	TSS	0.091	actb1	MA1136.1	chr1:8653776-8653785	0.391849	-0.056963	0.433714	junba	0.0510403	junba->actb1	4.50867	0.0952458	0	0	1.93563	3.62225	0	2.91119	Superficial_Epithelial_0dpa
actb1#chr1:8653391-8656525	chr1:8653391-8656525	TSS	0.091	actb1	MA1137.1	chr1:8654992-8655004	-0.911721	0.793938	1.80616	fosl1a	0.123797	fosl1a->actb1	4.74017	0.098046	0	0	2.74651	3.62225	0	2.91119	Superficial_Epithelial_0dpa
actb1#chr1:8653391-8656525	chr1:8653391-8656525	TSS	0.091	actb1	MA1137.1	chr1:8654992-8655004	-0.911721	0.793938	1.80616	fosl1a	0.123797	fosl1a->actb1	4.74017	0.098046	0	0	2.74651	3.62225	0	2.91119	Superficial_Epithelial_0dpa
actb1#chr1:8653391-8656525	chr1:8653391-8656525	TSS	0.091	actb1	MA1137.1	chr1:8655848-8655860	-0.13677	-0.126359	1.74549	fosl1a	0.123797	fosl1a->actb1	4.74017	0.098046	0	0	2.74651	3.62225	0	2.91119	Superficial_Epithelial_0dpa
actb1#chr1:8653391-8656525	chr1:8653391-8656525	TSS	0.091	actb1	MA1138.1	chr1:8654993-8655002	-0.706228	0.47416	0.968041	fosl2	0.084033	fosl2->actb1	9.37334	0.186945	0	0	1.62846	3.62225	0	2.91119	Superficial_Epithelial_0dpa
actb1#chr1:8653391-8656525	chr1:8653391-8656525	TSS	0.091	actb1	MA1138.1	chr1:8655849-8655858	0.0910419	-0.562104	1.68561	fosl2	0.084033	fosl2->actb1	9.37334	0.186945	0	0	1.62846	3.62225	0	2.91119	Superficial_Epithelial_0dpa
actb1#chr1:8653391-8656525	chr1:8653391-8656525	TSS	0.091	actb1	MA1138.1	chr1:8655850-8655859	0.0907663	-0.329148	1.70444	fosl2	0.084033	fosl2->actb1	9.37334	0.186945	0	0	1.62846	3.62225	0	2.91119	Superficial_Epithelial_0dpa
actb1#chr1:8653391-8656525	chr1:8653391-8656525	TSS	0.091	actb1	MA1139.1	chr1:8653775-8653786	-0.144115	0.531172	0.931904	fosl2	0.0569617	fosl2->actb1	9.37334	0.186945	0	0	1.62846	3.62225	0	2.91119	Superficial_Epithelial_0dpa
actb1#chr1:8653391-8656525	chr1:8653391-8656525	TSS	0.091	actb1	MA1139.1	chr1:8653775-8653786	-0.144115	0.531172	0.931904	fosl2	0.0569617	fosl2->actb1	9.37334	0.186945	0	0	1.62846	3.62225	0	2.91119	Superficial_Epithelial_0dpa
actb1#chr1:8653391-8656525	chr1:8653391-8656525	TSS	0.091	actb1	MA1142.1	chr1:8654993-8655002	-0.706228	0.47416	0.968041	fosl1a	0.132058	fosl1a->actb1	4.74017	0.098046	0	0	2.74651	3.62225	0	2.91119	Superficial_Epithelial_0dpa
actb1#chr1:8653391-8656525	chr1:8653391-8656525	TSS	0.091	actb1	MA1142.1	chr1:8655850-8655859	0.0907663	-0.329148	1.70444	fosl1a	0.132058	fosl1a->actb1	4.74017	0.098046	0	0	2.74651	3.62225	0	2.91119	Superficial_Epithelial_0dpa
actb1#chr1:8653391-8656525	chr1:8653391-8656525	TSS	0.091	actb1	MA1144.1	chr1:8654993-8655002	-0.706228	0.47416	0.968041	fosl2	0.0824373	fosl2->actb1	9.37334	0.186945	0	0	1.62846	3.62225	0	2.91119	Superficial_Epithelial_0dpa
actb1#chr1:8653391-8656525	chr1:8653391-8656525	TSS	0.091	actb1	MA1144.1	chr1:8655849-8655858	0.0910419	-0.562104	1.68561	fosl2	0.0824373	fosl2->actb1	9.37334	0.186945	0	0	1.62846	3.62225	0	2.91119	Superficial_Epithelial_0dpa
actb1#chr1:8653391-8656525	chr1:8653391-8656525	TSS	0.091	actb1	MA1144.1	chr1:8655850-8655859	0.0907663	-0.329148	1.70444	fosl2	0.0824373	fosl2->actb1	9.37334	0.186945	0	0	1.62846	3.62225	0	2.91119	Superficial_Epithelial_0dpa
actb1#chr1:8653391-8656525	chr1:8653391-8656525	TSS	0.091	actb1	MA0477.2	chr1:8654992-8655004	-0.911721	0.793938	1.80616	fosl1a	0.126437	fosl1a->actb1	4.74017	0.098046	0	0	2.74651	3.62225	0	2.91119	Superficial_Epithelial_0dpa
actb1#chr1:8653391-8656525	chr1:8653391-8656525	TSS	0.091	actb1	MA0477.2	chr1:8654992-8655004	-0.911721	0.793938	1.80616	fosl1a	0.126437	fosl1a->actb1	4.74017	0.098046	0	0	2.74651	3.62225	0	2.91119	Superficial_Epithelial_0dpa
actb1#chr1:8653391-8656525	chr1:8653391-8656525	TSS	0.091	actb1	MA0477.2	chr1:8655848-8655860	-0.13677	-0.126359	1.74549	fosl1a	0.126437	fosl1a->actb1	4.74017	0.098046	0	0	2.74651	3.62225	0	2.91119	Superficial_Epithelial_0dpa
actb1#chr1:8653391-8656525	chr1:8653391-8656525	TSS	0.091	actb1	MA1633.2	chr1:8655850-8655858	0.101158	-0.350582	1.77256	bach1b	0.0601907	bach1b->actb1	1.56131	0.158839	0	0	0.925602	3.62225	0	2.91119	Superficial_Epithelial_0dpa
actb2#chr3:40527961-40530381	chr3:40527961-40530381	TSS	0	actb2	MA1633.2	chr3:40530105-40530113	-0.369349	0.223	1.30407	bach1b	0.0601907	bach1b->actb2	3.39815	0.158781	0	0	0.925602	3.45588	0	1.66875	Superficial_Epithelial_0dpa
acvr1ba#chr23:27821976-27823170	chr23:27821976-27823170	TSS	0	acvr1ba	MA0695.1	chr23:27822869-27822880	-1.04224	0.852902	3.75199	zbtb7c	0.077786	zbtb7c->acvr1ba	1.45278	0.0424829	0	0	0.123195	0.432173	0	1.71646	Superficial_Epithelial_0dpa
adam10a#chr7:30491006-30494429	chr7:30491006-30494429	Body	0.071	adam10a	MA0517.1	chr7:30491423-30491437	-0.0853097	0.29562	0.0229083	stat1a	0.0569912	stat1a->adam10a	5.03413	0.0602538	0	0	1.21024	1.02007	0	1.43002	Superficial_Epithelial_0dpa
adam10a#chr7:30491006-30494429	chr7:30491006-30494429	Body	0.071	adam10a	MA0517.1	chr7:30491752-30491766	-0.393168	0.446489	1.29092	stat1a	0.0569912	stat1a->adam10a	5.03413	0.0602538	0	0	1.21024	1.02007	0	1.43002	Superficial_Epithelial_0dpa
adam10a#chr7:30491006-30494429	chr7:30491006-30494429	Body	0.071	adam10a	MA0734.3	chr7:30493888-30493900	-0.124483	0.0752963	0.147678	gli2a	0.101933	gli2a->adam10a	1.10382	0.0719516	0	0	0.0506187	1.02007	0	1.43002	Superficial_Epithelial_0dpa
adam10a#chr7:30491006-30494429	chr7:30491006-30494429	TSS	0.071	adam10a	MA0517.1	chr7:30491423-30491437	-0.0853097	0.29562	0.0229083	stat1a	0.0569912	stat1a->adam10a	5.03413	0.0602538	0	0	1.21024	1.02007	0	1.43002	Superficial_Epithelial_0dpa
adam10a#chr7:30491006-30494429	chr7:30491006-30494429	TSS	0.071	adam10a	MA0517.1	chr7:30491752-30491766	-0.393168	0.446489	1.29092	stat1a	0.0569912	stat1a->adam10a	5.03413	0.0602538	0	0	1.21024	1.02007	0	1.43002	Superficial_Epithelial_0dpa
adam10a#chr7:30491006-30494429	chr7:30491006-30494429	TSS	0.071	adam10a	MA0734.3	chr7:30493888-30493900	-0.124483	0.0752963	0.147678	gli2a	0.101933	gli2a->adam10a	1.10382	0.0719516	0	0	0.0506187	1.02007	0	1.43002	Superficial_Epithelial_0dpa
adam8b#chr12:9131864-9133744	chr12:9131864-9133744	Body	0.277	adam8b	MA0695.1	chr12:9132086-9132097	-0.0510303	0.0173888	0.0991199	zbtb7c	0.077786	zbtb7c->adam8b	2.27011	0.156013	0	0	0.123195	0.265622	0	0.644299	Superficial_Epithelial_0dpa
adam8b#chr12:9131864-9133744	chr12:9131864-9133744	Body	0.277	adam8b	MA1101.2	chr12:9133315-9133333	-0.172474	0.251125	0.3033	bach2b	0.0657534	bach2b->adam8b	51.717	0.386453	0	0	0.209666	0.265622	0	0.644299	Superficial_Epithelial_0dpa
adam8b#chr12:9131864-9133744	chr12:9131864-9133744	Body	0.277	adam8b	MA1101.2	chr12:9133315-9133333	-0.172474	0.251125	0.3033	bach2b	0.0657534	bach2b->adam8b	51.717	0.386453	0	0	0.209666	0.265622	0	0.644299	Superficial_Epithelial_0dpa
adam8b#chr12:9093359-9094465	chr12:9093359-9094465	Inter	0.329	adam8b	MA0525.2	chr12:9094016-9094033	-0.0466535	0.141386	0.0718094	tp63	0.180472	tp63->adam8b	33.4476	0.347683	0	0	0.439364	0.265622	0	0.192184	Superficial_Epithelial_0dpa
adam8b#chr12:9093359-9094465	chr12:9093359-9094465	Inter	0.329	adam8b	MA0525.2	chr12:9094016-9094033	-0.0466535	0.141386	0.0718094	tp63	0.180472	tp63->adam8b	33.4476	0.347683	0	0	0.439364	0.265622	0	0.192184	Superficial_Epithelial_0dpa
adam8b#chr12:9093359-9094465	chr12:9093359-9094465	Inter	0.329	adam8b	MA1101.2	chr12:9093601-9093619	-0.0413962	0.0446071	0.0641578	bach2b	0.0657534	bach2b->adam8b	51.717	0.386453	0	0	0.209666	0.265622	0	0.192184	Superficial_Epithelial_0dpa
adam8b#chr12:9093359-9094465	chr12:9093359-9094465	Inter	0.329	adam8b	MA1101.2	chr12:9094110-9094128	-0.0734383	0.0966128	0.0852506	bach2b	0.0657534	bach2b->adam8b	51.717	0.386453	0	0	0.209666	0.265622	0	0.192184	Superficial_Epithelial_0dpa
adam8b#chr12:9131864-9133744	chr12:9131864-9133744	TSS	0.277	adam8b	MA0695.1	chr12:9132086-9132097	-0.0510303	0.0173888	0.0991199	zbtb7c	0.077786	zbtb7c->adam8b	2.27011	0.156013	0	0	0.123195	0.265622	0	0.644299	Superficial_Epithelial_0dpa
adam8b#chr12:9131864-9133744	chr12:9131864-9133744	TSS	0.277	adam8b	MA1101.2	chr12:9133315-9133333	-0.172474	0.251125	0.3033	bach2b	0.0657534	bach2b->adam8b	51.717	0.386453	0	0	0.209666	0.265622	0	0.644299	Superficial_Epithelial_0dpa
adam8b#chr12:9131864-9133744	chr12:9131864-9133744	TSS	0.277	adam8b	MA1101.2	chr12:9133315-9133333	-0.172474	0.251125	0.3033	bach2b	0.0657534	bach2b->adam8b	51.717	0.386453	0	0	0.209666	0.265622	0	0.644299	Superficial_Epithelial_0dpa
adarb1b#chr9:45242388-45243054	chr9:45242388-45243054	Body	0.13	adarb1b	MA1101.2	chr9:45242762-45242780	-0.240336	0.501232	0.322061	bach2b	0.0657534	bach2b->adarb1b	35.2008	0.24538	0	0	0.209666	0.646864	0	0.814422	Superficial_Epithelial_0dpa
adgrf8#chr20:35750476-35752235	chr20:35750476-35752235	TSS	0	adgrf8	MA0107.1	chr20:35751716-35751725	-0.0363128	-0.00573987	0.120374	rela	0.0646949	rela->adgrf8	1.29116	0.04804	0	0	0.122663	0.880426	0	4.89034	Superficial_Epithelial_0dpa
adgrf8#chr20:35750476-35752235	chr20:35750476-35752235	TSS	0	adgrf8	MA0517.1	chr20:35751220-35751234	-0.618391	0.810274	0.78816	stat1b	0.151583	stat1b->adgrf8	3.89976	0.061186	0	0	0.572188	0.880426	0	4.89034	Superficial_Epithelial_0dpa
adgrf8#chr20:35750476-35752235	chr20:35750476-35752235	TSS	0	adgrf8	MA0609.2	chr20:35751381-35751396	-0.0218519	0.0336638	0.0862628	crema	0.0998319	crema->adgrf8	7.62742	0.0738543	0	0	1.34056	0.880426	0	4.89034	Superficial_Epithelial_0dpa
adgrf8#chr20:35750476-35752235	chr20:35750476-35752235	TSS	0	adgrf8	MA0609.2	chr20:35751381-35751396	-0.0218519	0.0336638	0.0862628	crema	0.0998319	crema->adgrf8	7.62742	0.0738543	0	0	1.34056	0.880426	0	4.89034	Superficial_Epithelial_0dpa
adgrf8#chr20:35750476-35752235	chr20:35750476-35752235	TSS	0	adgrf8	MA0050.3	chr20:35751222-35751236	-0.427326	0.445586	0.600127	irf1b	0.108859	irf1b->adgrf8	2.7024	0.0358054	0	0	0.586434	0.880426	0	4.89034	Superficial_Epithelial_0dpa
adgrf8#chr20:35750476-35752235	chr20:35750476-35752235	TSS	0	adgrf8	MA0050.3	chr20:35751449-35751463	-0.105962	0.199074	0.0632007	irf1b	0.108859	irf1b->adgrf8	2.7024	0.0358054	0	0	0.586434	0.880426	0	4.89034	Superficial_Epithelial_0dpa
adgrg1#chr7:28656997-28658525	chr7:28656997-28658525	TSS	0	adgrg1	MA0101.1	chr7:28657256-28657265	0.537678	0.283764	1.03523	rel	0.0845928	rel->adgrg1	1.93144	0.0800773	0	0	0.777053	0.451572	0	2.94438	Superficial_Epithelial_0dpa
adgrg1#chr7:28656997-28658525	chr7:28656997-28658525	TSS	0	adgrg1	MA0772.1	chr7:28658152-28658165	-0.44495	0.598243	2.64668	irf7	0.0852944	irf7->adgrg1	4.89339	0.0867709	0	0	0.785997	0.451572	0	2.94438	Superficial_Epithelial_0dpa
adgrg1#chr7:28656997-28658525	chr7:28656997-28658525	TSS	0	adgrg1	MA0640.2	chr7:28657319-28657332	0.625302	0.733336	-0.236425	elf3	0.0502292	elf3->adgrg1	15.3946	0.132329	0	0	1.46398	0.451572	0	2.94438	Superficial_Epithelial_0dpa
adipor2#chr4:8670074-8671662	chr4:8670074-8671662	TSS	0	adipor2	MA1131.1	chr4:8670135-8670145	0.170769	0.167208	0.759132	fosl2	0.0630162	fosl2->adipor2	4.47936	0.0744641	0	0	1.62846	2.04057	0	1.9272	Superficial_Epithelial_0dpa
adipor2#chr4:8670074-8671662	chr4:8670074-8671662	TSS	0	adipor2	MA1139.1	chr4:8670134-8670145	0.156539	0.157095	0.952639	fosl2	0.0569617	fosl2->adipor2	4.47936	0.0744641	0	0	1.62846	2.04057	0	1.9272	Superficial_Epithelial_0dpa
adipor2#chr4:8670074-8671662	chr4:8670074-8671662	TSS	0	adipor2	MA1139.1	chr4:8670134-8670145	0.156539	0.157095	0.952639	fosl2	0.0569617	fosl2->adipor2	4.47936	0.0744641	0	0	1.62846	2.04057	0	1.9272	Superficial_Epithelial_0dpa
adka#chr13:25193505-25194614	chr13:25193505-25194614	Body	0.192	adka	MA0525.2	chr13:25194163-25194180	-0.100416	0.117374	0.088592	tp63	0.180472	tp63->adka	13.0878	0.167232	0	0	0.439364	0.228044	0	0.238627	Superficial_Epithelial_0dpa
adka#chr13:25193505-25194614	chr13:25193505-25194614	Body	0.192	adka	MA1101.2	chr13:25194105-25194123	-0.129494	0.194517	0.163532	bach2b	0.0657534	bach2b->adka	25.4078	0.219438	0	0	0.209666	0.228044	0	0.238627	Superficial_Epithelial_0dpa
adka#chr13:25193505-25194614	chr13:25193505-25194614	Body	0.192	adka	MA1101.2	chr13:25194105-25194123	-0.129494	0.194517	0.163532	bach2b	0.0657534	bach2b->adka	25.4078	0.219438	0	0	0.209666	0.228044	0	0.238627	Superficial_Epithelial_0dpa
adrb2a#chr14:34828728-34832022	chr14:34828728-34832022	TSS	0	adrb2a	MA1116.1	chr14:34830257-34830266	-0.0212801	0.135698	0.106826	rbpjb	0.0631204	rbpjb->adrb2a	3.4787	0.0741112	0	0	0.343833	1.44087	0	2.09533	Superficial_Epithelial_0dpa
adrb2a#chr14:34828728-34832022	chr14:34828728-34832022	TSS	0	adrb2a	MA1131.1	chr14:34830057-34830067	-0.107996	0.264988	0.0830248	fosl2	0.0630162	fosl2->adrb2a	9.58227	0.0875071	0	0	1.62846	1.44087	0	2.09533	Superficial_Epithelial_0dpa
adrb2a#chr14:34828728-34832022	chr14:34828728-34832022	TSS	0	adrb2a	MA1515.1	chr14:34828942-34828952	-0.920669	1.03237	1.28865	klf2b	0.107486	klf2b->adrb2a	6.84703	0.0957229	0	0	1.42664	1.44087	0	2.09533	Superficial_Epithelial_0dpa
adrb2a#chr14:34828728-34832022	chr14:34828728-34832022	TSS	0	adrb2a	MA1515.1	chr14:34831897-34831907	0.00397318	0.533039	0.341287	klf2b	0.107486	klf2b->adrb2a	6.84703	0.0957229	0	0	1.42664	1.44087	0	2.09533	Superficial_Epithelial_0dpa
adrb2a#chr14:34828728-34832022	chr14:34828728-34832022	TSS	0	adrb2a	MA0609.2	chr14:34830653-34830668	0.768556	0.0240806	0.15539	crema	0.0998319	crema->adrb2a	3.16983	0.058451	0	0	1.34056	1.44087	0	2.09533	Superficial_Epithelial_0dpa
adrb2a#chr14:34828728-34832022	chr14:34828728-34832022	TSS	0	adrb2a	MA0609.2	chr14:34830653-34830668	0.768556	0.0240806	0.15539	crema	0.0998319	crema->adrb2a	3.16983	0.058451	0	0	1.34056	1.44087	0	2.09533	Superficial_Epithelial_0dpa
adrb2a#chr14:34828728-34832022	chr14:34828728-34832022	TSS	0	adrb2a	MA0480.2	chr14:34829622-34829632	-0.0392183	0.067368	0.0409653	foxo1a	0.0795932	foxo1a->adrb2a	4.44306	0.0689647	0	0	2.13262	1.44087	0	2.09533	Superficial_Epithelial_0dpa
agap3#chr24:34333872-34337067	chr24:34333872-34337067	TSS	0	agap3	MA0073.1	chr24:34334013-34334032	-0.066796	0.114605	0.0646378	rreb1a	0.0500665	rreb1a->agap3	1.44943	0.0462256	0	0	0.266798	1.47805	0	2.04541	Superficial_Epithelial_0dpa
agap3#chr24:34333872-34337067	chr24:34333872-34337067	TSS	0	agap3	MA0073.1	chr24:34334017-34334036	-0.0946993	0.131884	0.0964076	rreb1a	0.0500665	rreb1a->agap3	1.44943	0.0462256	0	0	0.266798	1.47805	0	2.04541	Superficial_Epithelial_0dpa
agap3#chr24:34333872-34337067	chr24:34333872-34337067	TSS	0	agap3	MA0073.1	chr24:34334019-34334038	-0.0670495	0.107998	0.0616266	rreb1a	0.0500665	rreb1a->agap3	1.44943	0.0462256	0	0	0.266798	1.47805	0	2.04541	Superficial_Epithelial_0dpa
agap3#chr24:34333872-34337067	chr24:34333872-34337067	TSS	0	agap3	MA0073.1	chr24:34334025-34334044	-0.0446327	0.0857787	0.0272365	rreb1a	0.0500665	rreb1a->agap3	1.44943	0.0462256	0	0	0.266798	1.47805	0	2.04541	Superficial_Epithelial_0dpa
agap3#chr24:34333872-34337067	chr24:34333872-34337067	TSS	0	agap3	MA0073.1	chr24:34334027-34334046	-0.0779157	0.124787	0.0848999	rreb1a	0.0500665	rreb1a->agap3	1.44943	0.0462256	0	0	0.266798	1.47805	0	2.04541	Superficial_Epithelial_0dpa
agap3#chr24:34333872-34337067	chr24:34333872-34337067	TSS	0	agap3	MA0073.1	chr24:34334029-34334048	-0.0545618	0.0924799	0.0575631	rreb1a	0.0500665	rreb1a->agap3	1.44943	0.0462256	0	0	0.266798	1.47805	0	2.04541	Superficial_Epithelial_0dpa
agap3#chr24:34333872-34337067	chr24:34333872-34337067	TSS	0	agap3	MA0073.1	chr24:34335197-34335216	-0.118677	0.088755	0.300899	rreb1a	0.0500665	rreb1a->agap3	1.44943	0.0462256	0	0	0.266798	1.47805	0	2.04541	Superficial_Epithelial_0dpa
agap3#chr24:34333872-34337067	chr24:34333872-34337067	TSS	0	agap3	MA0073.1	chr24:34335201-34335220	-0.127508	0.0911728	0.315015	rreb1a	0.0500665	rreb1a->agap3	1.44943	0.0462256	0	0	0.266798	1.47805	0	2.04541	Superficial_Epithelial_0dpa
agap3#chr24:34333872-34337067	chr24:34333872-34337067	TSS	0	agap3	MA0073.1	chr24:34335205-34335224	-0.156026	0.117595	0.362959	rreb1a	0.0500665	rreb1a->agap3	1.44943	0.0462256	0	0	0.266798	1.47805	0	2.04541	Superficial_Epithelial_0dpa
agbl5#chr4:760087-762690	chr4:760087-762690	TSS	0	agbl5	MA1648.1	chr4:761294-761304	-0.865897	0.711798	1.60722	tcf12	0.0500565	tcf12->agbl5	2.17199	0.0424318	0	0	0.112757	0.0269039	0	1.53479	Superficial_Epithelial_0dpa
ago3b#chr19:10661169-10662742	chr19:10661169-10662742	TSS	0	ago3b	MA1509.1	chr19:10661584-10661592	-1.43423	1.9453	2.12037	irf6	0.0899394	irf6->ago3b	3.96053	0.0738016	0	0	0.476886	0.981202	0	1.8284	Superficial_Epithelial_0dpa
ago3b#chr19:10661169-10662742	chr19:10661169-10662742	TSS	0	ago3b	MA0609.2	chr19:10662091-10662106	-0.0260708	0.116514	0.00643616	crema	0.0998319	crema->ago3b	5.38568	0.0857176	0	0	1.34056	0.981202	0	1.8284	Superficial_Epithelial_0dpa
ago3b#chr19:10661169-10662742	chr19:10661169-10662742	TSS	0	ago3b	MA0609.2	chr19:10662385-10662400	0.389831	0.0791008	1.10312	crema	0.0998319	crema->ago3b	5.38568	0.0857176	0	0	1.34056	0.981202	0	1.8284	Superficial_Epithelial_0dpa
ago3b#chr19:10661169-10662742	chr19:10661169-10662742	TSS	0	ago3b	MA0609.2	chr19:10662091-10662106	-0.0260708	0.116514	0.00643616	crema	0.0998319	crema->ago3b	5.38568	0.0857176	0	0	1.34056	0.981202	0	1.8284	Superficial_Epithelial_0dpa
ago3b#chr19:10661169-10662742	chr19:10661169-10662742	TSS	0	ago3b	MA0609.2	chr19:10662385-10662400	0.389831	0.0791008	1.10312	crema	0.0998319	crema->ago3b	5.38568	0.0857176	0	0	1.34056	0.981202	0	1.8284	Superficial_Epithelial_0dpa
ahcy#chr6:49924963-49927066	chr6:49924963-49927066	TSS	0	ahcy	MA0147.3	chr6:49926882-49926893	-0.265849	1.0685	0.150526	mycb	0.052455	mycb->ahcy	1.41563	0.0593412	0	0	0.281657	0.992068	0	1.56895	Superficial_Epithelial_0dpa
ahnak#chr14:26758988-26761788	chr14:26758988-26761788	TSS	0	ahnak	MA1515.1	chr14:26759259-26759269	-0.717532	0.984745	2.07846	klf2b	0.107486	klf2b->ahnak	7.69964	0.12586	0	0	1.42664	4.17859	0	2.04678	Superficial_Epithelial_0dpa
ahnak#chr14:26758988-26761788	chr14:26758988-26761788	TSS	0	ahnak	MA1515.1	chr14:26760863-26760873	-0.0431277	0.255452	0.3847	klf2b	0.107486	klf2b->ahnak	7.69964	0.12586	0	0	1.42664	4.17859	0	2.04678	Superficial_Epithelial_0dpa
akap13#chr25:11208908-11211308	chr25:11208908-11211308	TSS	0	akap13	MA1515.1	chr25:11209787-11209797	-0.400553	0.641592	2.90976	klf2b	0.107486	klf2b->akap13	3.13733	0.0731845	0	0	1.42664	1.85956	0	3.17177	Superficial_Epithelial_0dpa
AL954191.2#chr5:13575653-13576576	chr5:13575653-13576576	Inter	0.051	AL954191.2	MA0522.3	chr5:13576233-13576243	-0.110782	0.368401	0.0385315	tcf3a	0.0820155	tcf3a->AL954191.2	2.16125	0.0613656	0	0	0.450357	0.528393	0	6.17486	Superficial_Epithelial_0dpa
alcama#chr10:28834090-28835931	chr10:28834090-28835931	TSS	0	alcama	MA1955.1	chr10:28834954-28834967	-0.0015124	0.00987762	0.104711	elk3	0.0570459	elk3->alcama	1.48717	0.0451493	0	0	0.322853	1.18201	0	2.19969	Superficial_Epithelial_0dpa
alox12#chr7:26030291-26030803	chr7:26030291-26030803	TSS	0	alox12	MA0517.1	chr7:26030644-26030658	-0.00491974	0.0658321	0.0552456	stat1b	0.151583	stat1b->alox12	5.51033	0.1135	0	0	0.572188	0.201757	0	4.28184	Superficial_Epithelial_0dpa
amd1#chr20:2948527-2951419	chr20:2948527-2951419	TSS	0	amd1	MA1129.1	chr20:2951324-2951333	-0.528891	0.513783	0.319642	jun	0.0526979	jun->amd1	2.07387	0.0476622	0	0	2.12638	0.892082	0	1.55803	Superficial_Epithelial_0dpa
amd1#chr20:2948527-2951419	chr20:2948527-2951419	TSS	0	amd1	MA1133.1	chr20:2951323-2951334	-0.492773	0.721016	0.370957	jun	0.05518	jun->amd1	2.07387	0.0476622	0	0	2.12638	0.892082	0	1.55803	Superficial_Epithelial_0dpa
amd1#chr20:2948527-2951419	chr20:2948527-2951419	TSS	0	amd1	MA1133.1	chr20:2949972-2949983	0.277809	1.38426	0.204258	jun	0.05518	jun->amd1	2.07387	0.0476622	0	0	2.12638	0.892082	0	1.55803	Superficial_Epithelial_0dpa
amd1#chr20:2948527-2951419	chr20:2948527-2951419	TSS	0	amd1	MA1515.1	chr20:2950290-2950300	0.021806	0.0960171	0.0580134	klf2b	0.107486	klf2b->amd1	2.10942	0.0575163	0	0	1.42664	0.892082	0	1.55803	Superficial_Epithelial_0dpa
amd1#chr20:2948527-2951419	chr20:2948527-2951419	TSS	0	amd1	MA1515.1	chr20:2951391-2951401	-0.109098	0.111543	0.12662	klf2b	0.107486	klf2b->amd1	2.10942	0.0575163	0	0	1.42664	0.892082	0	1.55803	Superficial_Epithelial_0dpa
amd1#chr20:2948527-2951419	chr20:2948527-2951419	TSS	0	amd1	MA1951.1	chr20:2949971-2949984	-0.00457025	2.85415	1.01035	fosab	0.154414	fosab->amd1	2.93452	0.0657819	0	0	2.65236	0.892082	0	1.55803	Superficial_Epithelial_0dpa
amn1#chr25:28893083-28894560	chr25:28893083-28894560	TSS	0	amn1	MA1126.1	chr25:28893600-28893615	-0.155846	0.184248	0.368966	fosab	0.10646	fosab->amn1	1.28768	0.0499156	0	0	2.65236	0.00665805	0	0.955175	Superficial_Epithelial_0dpa
amn1#chr25:28893083-28894560	chr25:28893083-28894560	TSS	0	amn1	MA1951.1	chr25:28893603-28893616	-0.225107	0.263632	0.424074	fosab	0.154414	fosab->amn1	1.28768	0.0499156	0	0	2.65236	0.00665805	0	0.955175	Superficial_Epithelial_0dpa
amot#chr21:37514695-37516652	chr21:37514695-37516652	Body	0.188	amot	MA0525.2	chr21:37515638-37515655	-0.129376	0.148971	0.130391	tp63	0.180472	tp63->amot	2.14085	0.118277	0	0	0.439364	0.292332	0	0.567013	Superficial_Epithelial_0dpa
amot#chr21:37514695-37516652	chr21:37514695-37516652	Body	0.188	amot	MA0525.2	chr21:37515638-37515655	-0.129376	0.148971	0.130391	tp63	0.180472	tp63->amot	2.14085	0.118277	0	0	0.439364	0.292332	0	0.567013	Superficial_Epithelial_0dpa
amot#chr21:37477088-37478923	chr21:37477088-37478923	TSS	0	amot	MA0640.2	chr21:37478605-37478618	-0.0624394	0.149807	0.0286712	elf3	0.0502292	elf3->amot	1.55161	0.0485255	0	0	1.46398	0.292332	0	0.454259	Superficial_Epithelial_0dpa
amotl2b#chr2:22851222-22852185	chr2:22851222-22852185	TSS	0	amotl2b	MA1131.1	chr2:22851564-22851574	-0.45499	0.836192	0.90708	fosl2	0.0630162	fosl2->amotl2b	2.12451	0.0774236	0	0	1.62846	0.899226	0	1.76198	Superficial_Epithelial_0dpa
amotl2b#chr2:22851222-22852185	chr2:22851222-22852185	TSS	0	amotl2b	MA1131.1	chr2:22851565-22851575	-0.515159	0.8751	1.00089	fosl2	0.0630162	fosl2->amotl2b	2.12451	0.0774236	0	0	1.62846	0.899226	0	1.76198	Superficial_Epithelial_0dpa
amotl2b#chr2:22851222-22852185	chr2:22851222-22852185	TSS	0	amotl2b	MA1139.1	chr2:22851564-22851575	-0.472229	0.833252	0.850283	fosl2	0.0569617	fosl2->amotl2b	2.12451	0.0774236	0	0	1.62846	0.899226	0	1.76198	Superficial_Epithelial_0dpa
amotl2b#chr2:22851222-22852185	chr2:22851222-22852185	TSS	0	amotl2b	MA1139.1	chr2:22851564-22851575	-0.472229	0.833252	0.850283	fosl2	0.0569617	fosl2->amotl2b	2.12451	0.0774236	0	0	1.62846	0.899226	0	1.76198	Superficial_Epithelial_0dpa
ampd3b#chr18:16791146-16792733	chr18:16791146-16792733	TSS	0	ampd3b	MA1128.1	chr18:16791934-16791946	-0.0527855	1.06551	1.04773	fosl1a	0.122265	fosl1a->ampd3b	52.5738	0.229716	0	0	2.74651	2.42964	0	3.23662	Superficial_Epithelial_0dpa
angptl4#chr2:24536043-24537315	chr2:24536043-24537315	Body	0.132	angptl4	MA1133.1	chr2:24536181-24536192	-0.0500754	0.0776988	0.064283	junbb	0.090798	junbb->angptl4	1.53814	0.0696201	0	0	1.09612	0.227916	0	0.4152	Superficial_Epithelial_0dpa
angptl4#chr2:24536043-24537315	chr2:24536043-24537315	Body	0.132	angptl4	MA0742.2	chr2:24536648-24536656	-0.0678453	0.197449	-0.0533271	klf12b	0.0830955	klf12b->angptl4	2.2136	0.108797	0	0	0.00592045	0.227916	0	0.4152	Superficial_Epithelial_0dpa
angptl4#chr2:24541418-24542251	chr2:24541418-24542251	Body	0.105	angptl4	MA0695.1	chr2:24541428-24541439	-0.0555463	0.065803	0.0653158	zbtb7c	0.077786	zbtb7c->angptl4	2.95591	0.0716924	0	0	0.123195	0.227916	0	0.235397	Superficial_Epithelial_0dpa
angptl4#chr2:24541418-24542251	chr2:24541418-24542251	Body	0.105	angptl4	MA0525.2	chr2:24541857-24541874	0.00345204	0.0374384	0.119014	tp63	0.180472	tp63->angptl4	16.562	0.148725	0	0	0.439364	0.227916	0	0.235397	Superficial_Epithelial_0dpa
angptl4#chr2:24536043-24537315	chr2:24536043-24537315	TSS	0.132	angptl4	MA1133.1	chr2:24536181-24536192	-0.0500754	0.0776988	0.064283	junbb	0.090798	junbb->angptl4	1.53814	0.0696201	0	0	1.09612	0.227916	0	0.4152	Superficial_Epithelial_0dpa
angptl4#chr2:24536043-24537315	chr2:24536043-24537315	TSS	0.132	angptl4	MA0742.2	chr2:24536648-24536656	-0.0678453	0.197449	-0.0533271	klf12b	0.0830955	klf12b->angptl4	2.2136	0.108797	0	0	0.00592045	0.227916	0	0.4152	Superficial_Epithelial_0dpa
angptl4#chr2:24538698-24539416	chr2:24538698-24539416	TSS	0	angptl4	MA1527.1	chr2:24539167-24539183	0.000176562	0.140475	0.00829268	nfic	0.072754	nfic->angptl4	1.29962	0.0782653	0	0	0.510769	0.227916	0	1.02805	Superficial_Epithelial_0dpa
angptl4#chr2:24538698-24539416	chr2:24538698-24539416	TSS	0	angptl4	MA1527.1	chr2:24539234-24539250	-0.0798729	0.0883422	0.202752	nfic	0.072754	nfic->angptl4	1.29962	0.0782653	0	0	0.510769	0.227916	0	1.02805	Superficial_Epithelial_0dpa
ank3a#chr17:20897150-20898274	chr17:20897150-20898274	Body	0.066	ank3a	MA0050.3	chr17:20897694-20897708	0.0529169	0.0430781	0.159845	irf1b	0.108859	irf1b->ank3a	1.31932	0.0542773	0	0	0.586434	0.501425	0	4.15389	Superficial_Epithelial_0dpa
ank3a#chr17:20781838-20782490	chr17:20781838-20782490	TSS	0	ank3a	MA0050.3	chr17:20781953-20781967	-0.0628581	0.0549959	0.0928881	irf1b	0.108859	irf1b->ank3a	1.31932	0.0542773	0	0	0.586434	0.501425	0	8.43042	Superficial_Epithelial_0dpa
ank3a#chr17:20897150-20898274	chr17:20897150-20898274	TSS	0.066	ank3a	MA0050.3	chr17:20897694-20897708	0.0529169	0.0430781	0.159845	irf1b	0.108859	irf1b->ank3a	1.31932	0.0542773	0	0	0.586434	0.501425	0	4.15389	Superficial_Epithelial_0dpa
ankib1b#chr16:16119526-16121338	chr16:16119526-16121338	TSS	0	ankib1b	MA0144.2	chr16:16119892-16119902	-0.0926206	0.130141	0.032387	stat3	0.0671814	stat3->ankib1b	1.77669	0.0695927	0	0	0.981733	0.293598	0	2.03164	Superficial_Epithelial_0dpa
ankle2#chr5:18960695-18963104	chr5:18960695-18963104	TSS	0	ankle2	MA1099.2	chr5:18961717-18961726	-1.34695	0.773352	2.04744	her6	0.0672081	her6->ankle2	1.7082	0.057867	0	0	0.024186	0.0819897	0	1.77261	Superficial_Epithelial_0dpa
ankmy1#chr22:15569647-15570594	chr22:15569647-15570594	TSS	0	ankmy1	MA0478.1	chr22:15570180-15570190	-0.0532527	0.0716558	0.0526781	fosl2	0.0934041	fosl2->ankmy1	6.86413	0.0833018	0	0	1.62846	0.618074	0	1.1643	Superficial_Epithelial_0dpa
ankrd22#chr12:17154334-17156522	chr12:17154334-17156522	TSS	0	ankrd22	MA1128.1	chr12:17154625-17154637	-0.00192965	0.00919378	0.207758	fosl1a	0.122265	fosl1a->ankrd22	1.98299	0.0607223	0	0	2.74651	1.48427	0	1.6276	Superficial_Epithelial_0dpa
ankrd22#chr12:17154334-17156522	chr12:17154334-17156522	TSS	0	ankrd22	MA1128.1	chr12:17156368-17156380	0.0501021	0.254184	-0.0385105	fosl1a	0.122265	fosl1a->ankrd22	1.98299	0.0607223	0	0	2.74651	1.48427	0	1.6276	Superficial_Epithelial_0dpa
ankrd22#chr12:17154334-17156522	chr12:17154334-17156522	TSS	0	ankrd22	MA1128.1	chr12:17154749-17154761	0.116008	0.726185	1.11016	fosl1a	0.122265	fosl1a->ankrd22	1.98299	0.0607223	0	0	2.74651	1.48427	0	1.6276	Superficial_Epithelial_0dpa
ankrd22#chr12:17154334-17156522	chr12:17154334-17156522	TSS	0	ankrd22	MA1128.1	chr12:17155120-17155132	-0.0218178	-0.11528	0.481035	fosl1a	0.122265	fosl1a->ankrd22	1.98299	0.0607223	0	0	2.74651	1.48427	0	1.6276	Superficial_Epithelial_0dpa
ankrd22#chr12:17154334-17156522	chr12:17154334-17156522	TSS	0	ankrd22	MA1130.1	chr12:17154749-17154760	0.0898196	0.814151	1.11103	fosl2	0.0837069	fosl2->ankrd22	1.10243	0.063736	0	0	1.62846	1.48427	0	1.6276	Superficial_Epithelial_0dpa
ankrd22#chr12:17154334-17156522	chr12:17154334-17156522	TSS	0	ankrd22	MA1130.1	chr12:17154626-17154637	0.00299035	0.0247042	0.159102	fosl2	0.0837069	fosl2->ankrd22	1.10243	0.063736	0	0	1.62846	1.48427	0	1.6276	Superficial_Epithelial_0dpa
ankrd22#chr12:17154334-17156522	chr12:17154334-17156522	TSS	0	ankrd22	MA1130.1	chr12:17156369-17156380	0.0542773	0.198103	-0.035249	fosl2	0.0837069	fosl2->ankrd22	1.10243	0.063736	0	0	1.62846	1.48427	0	1.6276	Superficial_Epithelial_0dpa
ankrd22#chr12:17154334-17156522	chr12:17154334-17156522	TSS	0	ankrd22	MA1131.1	chr12:17154733-17154743	-0.175618	1.58382	0.323349	fosl2	0.0630162	fosl2->ankrd22	1.10243	0.063736	0	0	1.62846	1.48427	0	1.6276	Superficial_Epithelial_0dpa
ankrd22#chr12:17154334-17156522	chr12:17154334-17156522	TSS	0	ankrd22	MA1137.1	chr12:17154625-17154637	-0.00192965	0.00919378	0.207758	fosl1a	0.123797	fosl1a->ankrd22	1.98299	0.0607223	0	0	2.74651	1.48427	0	1.6276	Superficial_Epithelial_0dpa
ankrd22#chr12:17154334-17156522	chr12:17154334-17156522	TSS	0	ankrd22	MA1137.1	chr12:17156368-17156380	0.0501021	0.254184	-0.0385105	fosl1a	0.123797	fosl1a->ankrd22	1.98299	0.0607223	0	0	2.74651	1.48427	0	1.6276	Superficial_Epithelial_0dpa
ankrd22#chr12:17154334-17156522	chr12:17154334-17156522	TSS	0	ankrd22	MA1137.1	chr12:17155120-17155132	-0.0218178	-0.11528	0.481035	fosl1a	0.123797	fosl1a->ankrd22	1.98299	0.0607223	0	0	2.74651	1.48427	0	1.6276	Superficial_Epithelial_0dpa
ankrd22#chr12:17154334-17156522	chr12:17154334-17156522	TSS	0	ankrd22	MA1138.1	chr12:17156369-17156378	0.0163101	0.214131	-0.0362924	fosl2	0.084033	fosl2->ankrd22	1.10243	0.063736	0	0	1.62846	1.48427	0	1.6276	Superficial_Epithelial_0dpa
ankrd22#chr12:17154334-17156522	chr12:17154334-17156522	TSS	0	ankrd22	MA1142.1	chr12:17156369-17156378	0.0163101	0.214131	-0.0362924	fosl1a	0.132058	fosl1a->ankrd22	1.98299	0.0607223	0	0	2.74651	1.48427	0	1.6276	Superficial_Epithelial_0dpa
ankrd22#chr12:17154334-17156522	chr12:17154334-17156522	TSS	0	ankrd22	MA0477.2	chr12:17154625-17154637	-0.00192965	0.00919378	0.207758	fosl1a	0.126437	fosl1a->ankrd22	1.98299	0.0607223	0	0	2.74651	1.48427	0	1.6276	Superficial_Epithelial_0dpa
ankrd22#chr12:17154334-17156522	chr12:17154334-17156522	TSS	0	ankrd22	MA0477.2	chr12:17156368-17156380	0.0501021	0.254184	-0.0385105	fosl1a	0.126437	fosl1a->ankrd22	1.98299	0.0607223	0	0	2.74651	1.48427	0	1.6276	Superficial_Epithelial_0dpa
ankrd22#chr12:17154334-17156522	chr12:17154334-17156522	TSS	0	ankrd22	MA0477.2	chr12:17156368-17156380	0.0501021	0.254184	-0.0385105	fosl1a	0.126437	fosl1a->ankrd22	1.98299	0.0607223	0	0	2.74651	1.48427	0	1.6276	Superficial_Epithelial_0dpa
ano1#chr7:54406525-54407555	chr7:54406525-54407555	Body	0.058	ano1	MA1527.1	chr7:54406938-54406954	-0.833453	0.616801	1.36927	nfic	0.072754	nfic->ano1	5.11617	0.118923	0	0	0.510769	1.29019	0	3.51499	Superficial_Epithelial_0dpa
ano1#chr7:54406525-54407555	chr7:54406525-54407555	Body	0.058	ano1	MA1527.1	chr7:54406938-54406954	-0.833453	0.616801	1.36927	nfic	0.072754	nfic->ano1	5.11617	0.118923	0	0	0.510769	1.29019	0	3.51499	Superficial_Epithelial_0dpa
ano9a#chr25:35181689-35182583	chr25:35181689-35182583	TSS	0	ano9a	MA0591.1	chr25:35182347-35182361	-0.624707	1.27166	1.12694	bach1b	0.0525138	bach1b->ano9a	4.20345	0.0796761	0	0	0.925602	0.963955	0	2.67268	Superficial_Epithelial_0dpa
ano9a#chr25:35181689-35182583	chr25:35181689-35182583	TSS	0	ano9a	MA0840.1	chr25:35182396-35182407	-0.348362	1.19071	0.263831	creb5b	0.128114	creb5b->ano9a	3.26199	0.0509886	0	0	0.361049	0.963955	0	2.67268	Superficial_Epithelial_0dpa
ano9a#chr25:35181689-35182583	chr25:35181689-35182583	TSS	0	ano9a	MA0840.1	chr25:35182396-35182407	-0.348362	1.19071	0.263831	creb5b	0.128114	creb5b->ano9a	3.26199	0.0509886	0	0	0.361049	0.963955	0	2.67268	Superficial_Epithelial_0dpa
ano9a#chr25:35181689-35182583	chr25:35181689-35182583	TSS	0	ano9a	MA1136.1	chr25:35182397-35182406	-0.341715	1.24518	0.256725	junba	0.0510403	junba->ano9a	1.16199	0.0330984	0	0	1.93563	0.963955	0	2.67268	Superficial_Epithelial_0dpa
ano9a#chr25:35181689-35182583	chr25:35181689-35182583	TSS	0	ano9a	MA1136.1	chr25:35182397-35182406	-0.341715	1.24518	0.256725	junba	0.0510403	junba->ano9a	1.16199	0.0330984	0	0	1.93563	0.963955	0	2.67268	Superficial_Epithelial_0dpa
ano9a#chr25:35181689-35182583	chr25:35181689-35182583	TSS	0	ano9a	MA0609.2	chr25:35182394-35182409	-0.240548	0.559903	0.120651	crema	0.0998319	crema->ano9a	8.13523	0.0682774	0	0	1.34056	0.963955	0	2.67268	Superficial_Epithelial_0dpa
ano9a#chr25:35181689-35182583	chr25:35181689-35182583	TSS	0	ano9a	MA0609.2	chr25:35182394-35182409	-0.240548	0.559903	0.120651	crema	0.0998319	crema->ano9a	8.13523	0.0682774	0	0	1.34056	0.963955	0	2.67268	Superficial_Epithelial_0dpa
ano9a#chr25:35181689-35182583	chr25:35181689-35182583	TSS	0	ano9a	MA1633.2	chr25:35182350-35182358	-0.852962	1.38787	1.96586	bach1b	0.0601907	bach1b->ano9a	4.20345	0.0796761	0	0	0.925602	0.963955	0	2.67268	Superficial_Epithelial_0dpa
ano9b#chr7:32901387-32902072	chr7:32901387-32902072	Body	0.051	ano9b	MA1509.1	chr7:32901520-32901528	-0.30017	1.01973	0.914469	irf6	0.0899394	irf6->ano9b	8.0748	0.0901674	0	0	0.476886	0.86363	0	2.5441	Superficial_Epithelial_0dpa
ano9b#chr7:32901387-32902072	chr7:32901387-32902072	TSS	0.051	ano9b	MA1509.1	chr7:32901520-32901528	-0.30017	1.01973	0.914469	irf6	0.0899394	irf6->ano9b	8.0748	0.0901674	0	0	0.476886	0.86363	0	2.5441	Superficial_Epithelial_0dpa
anxa11a#chr13:16279082-16280556	chr13:16279082-16280556	Body	0.069	anxa11a	MA1126.1	chr13:16279715-16279730	0.807542	-0.759182	1.24049	fosab	0.10646	fosab->anxa11a	21.4213	0.166229	0	0	2.65236	3.10342	0	1.98175	Superficial_Epithelial_0dpa
anxa11a#chr13:16279082-16280556	chr13:16279082-16280556	Body	0.069	anxa11a	MA1128.1	chr13:16279782-16279794	-0.850622	3.1663	1.64984	fosl1a	0.122265	fosl1a->anxa11a	13.5808	0.11989	0	0	2.74651	3.10342	0	1.98175	Superficial_Epithelial_0dpa
anxa11a#chr13:16279082-16280556	chr13:16279082-16280556	Body	0.069	anxa11a	MA1128.1	chr13:16279782-16279794	-0.850622	3.1663	1.64984	fosl1a	0.122265	fosl1a->anxa11a	13.5808	0.11989	0	0	2.74651	3.10342	0	1.98175	Superficial_Epithelial_0dpa
anxa11a#chr13:16279082-16280556	chr13:16279082-16280556	Body	0.069	anxa11a	MA1137.1	chr13:16279782-16279794	-0.850622	3.1663	1.64984	fosl1a	0.123797	fosl1a->anxa11a	13.5808	0.11989	0	0	2.74651	3.10342	0	1.98175	Superficial_Epithelial_0dpa
anxa11a#chr13:16279082-16280556	chr13:16279082-16280556	Body	0.069	anxa11a	MA1137.1	chr13:16279782-16279794	-0.850622	3.1663	1.64984	fosl1a	0.123797	fosl1a->anxa11a	13.5808	0.11989	0	0	2.74651	3.10342	0	1.98175	Superficial_Epithelial_0dpa
anxa11a#chr13:16279082-16280556	chr13:16279082-16280556	Body	0.069	anxa11a	MA1142.1	chr13:16279783-16279792	-0.734494	3.10966	1.02894	fosl1a	0.132058	fosl1a->anxa11a	13.5808	0.11989	0	0	2.74651	3.10342	0	1.98175	Superficial_Epithelial_0dpa
anxa11a#chr13:16279082-16280556	chr13:16279082-16280556	Body	0.069	anxa11a	MA1142.1	chr13:16279784-16279793	-1.01114	3.37939	1.39624	fosl1a	0.132058	fosl1a->anxa11a	13.5808	0.11989	0	0	2.74651	3.10342	0	1.98175	Superficial_Epithelial_0dpa
anxa11a#chr13:16279082-16280556	chr13:16279082-16280556	Body	0.069	anxa11a	MA0477.2	chr13:16279782-16279794	-0.850622	3.1663	1.64984	fosl1a	0.126437	fosl1a->anxa11a	13.5808	0.11989	0	0	2.74651	3.10342	0	1.98175	Superficial_Epithelial_0dpa
anxa11a#chr13:16279082-16280556	chr13:16279082-16280556	Body	0.069	anxa11a	MA0477.2	chr13:16279782-16279794	-0.850622	3.1663	1.64984	fosl1a	0.126437	fosl1a->anxa11a	13.5808	0.11989	0	0	2.74651	3.10342	0	1.98175	Superficial_Epithelial_0dpa
anxa11a#chr13:16279082-16280556	chr13:16279082-16280556	TSS	0.069	anxa11a	MA1126.1	chr13:16279715-16279730	0.807542	-0.759182	1.24049	fosab	0.10646	fosab->anxa11a	21.4213	0.166229	0	0	2.65236	3.10342	0	1.98175	Superficial_Epithelial_0dpa
anxa11a#chr13:16279082-16280556	chr13:16279082-16280556	TSS	0.069	anxa11a	MA1128.1	chr13:16279782-16279794	-0.850622	3.1663	1.64984	fosl1a	0.122265	fosl1a->anxa11a	13.5808	0.11989	0	0	2.74651	3.10342	0	1.98175	Superficial_Epithelial_0dpa
anxa11a#chr13:16279082-16280556	chr13:16279082-16280556	TSS	0.069	anxa11a	MA1128.1	chr13:16279782-16279794	-0.850622	3.1663	1.64984	fosl1a	0.122265	fosl1a->anxa11a	13.5808	0.11989	0	0	2.74651	3.10342	0	1.98175	Superficial_Epithelial_0dpa
anxa11a#chr13:16279082-16280556	chr13:16279082-16280556	TSS	0.069	anxa11a	MA1137.1	chr13:16279782-16279794	-0.850622	3.1663	1.64984	fosl1a	0.123797	fosl1a->anxa11a	13.5808	0.11989	0	0	2.74651	3.10342	0	1.98175	Superficial_Epithelial_0dpa
anxa11a#chr13:16279082-16280556	chr13:16279082-16280556	TSS	0.069	anxa11a	MA1137.1	chr13:16279782-16279794	-0.850622	3.1663	1.64984	fosl1a	0.123797	fosl1a->anxa11a	13.5808	0.11989	0	0	2.74651	3.10342	0	1.98175	Superficial_Epithelial_0dpa
anxa11a#chr13:16279082-16280556	chr13:16279082-16280556	TSS	0.069	anxa11a	MA1142.1	chr13:16279783-16279792	-0.734494	3.10966	1.02894	fosl1a	0.132058	fosl1a->anxa11a	13.5808	0.11989	0	0	2.74651	3.10342	0	1.98175	Superficial_Epithelial_0dpa
anxa11a#chr13:16279082-16280556	chr13:16279082-16280556	TSS	0.069	anxa11a	MA1142.1	chr13:16279784-16279793	-1.01114	3.37939	1.39624	fosl1a	0.132058	fosl1a->anxa11a	13.5808	0.11989	0	0	2.74651	3.10342	0	1.98175	Superficial_Epithelial_0dpa
anxa11a#chr13:16279082-16280556	chr13:16279082-16280556	TSS	0.069	anxa11a	MA0477.2	chr13:16279782-16279794	-0.850622	3.1663	1.64984	fosl1a	0.126437	fosl1a->anxa11a	13.5808	0.11989	0	0	2.74651	3.10342	0	1.98175	Superficial_Epithelial_0dpa
anxa11a#chr13:16279082-16280556	chr13:16279082-16280556	TSS	0.069	anxa11a	MA0477.2	chr13:16279782-16279794	-0.850622	3.1663	1.64984	fosl1a	0.126437	fosl1a->anxa11a	13.5808	0.11989	0	0	2.74651	3.10342	0	1.98175	Superficial_Epithelial_0dpa
anxa1a#chr5:25581881-25583677	chr5:25581881-25583677	Body	0.053	anxa1a	MA0478.1	chr5:25582540-25582550	-0.326847	0.358964	0.847317	fosl2	0.0934041	fosl2->anxa1a	2.38875	0.048461	0	0	1.62846	2.1877	0	1.99256	Superficial_Epithelial_0dpa
anxa1a#chr5:25581881-25583677	chr5:25581881-25583677	TSS	0.053	anxa1a	MA0478.1	chr5:25582540-25582550	-0.326847	0.358964	0.847317	fosl2	0.0934041	fosl2->anxa1a	2.38875	0.048461	0	0	1.62846	2.1877	0	1.99256	Superficial_Epithelial_0dpa
anxa2a#chr25:34012475-34014792	chr25:34012475-34014792	TSS	0	anxa2a	MA1131.1	chr25:34014366-34014376	-0.608832	0.944673	1.20623	fosl2	0.0630162	fosl2->anxa2a	3.43956	0.0825715	0	0	1.62846	2.06409	0	2.3273	Superficial_Epithelial_0dpa
anxa2a#chr25:34012475-34014792	chr25:34012475-34014792	TSS	0	anxa2a	MA1136.1	chr25:34014366-34014375	-0.493671	0.76927	1.07956	junba	0.0510403	junba->anxa2a	2.26127	0.0578352	0	0	1.93563	2.06409	0	2.3273	Superficial_Epithelial_0dpa
anxa2a#chr25:34012475-34014792	chr25:34012475-34014792	TSS	0	anxa2a	MA1136.1	chr25:34014366-34014375	-0.493671	0.76927	1.07956	junba	0.0510403	junba->anxa2a	2.26127	0.0578352	0	0	1.93563	2.06409	0	2.3273	Superficial_Epithelial_0dpa
anxa4#chr10:41158929-41160255	chr10:41158929-41160255	Body	0.084	anxa4	MA0742.2	chr10:41159341-41159349	0.181227	0.211517	-0.0931299	klf12b	0.0830955	klf12b->anxa4	1.34637	0.0781886	0	0	0.00592045	0.143789	0	0.592555	Superficial_Epithelial_0dpa
anxa4#chr10:41158929-41160255	chr10:41158929-41160255	TSS	0.084	anxa4	MA0742.2	chr10:41159341-41159349	0.181227	0.211517	-0.0931299	klf12b	0.0830955	klf12b->anxa4	1.34637	0.0781886	0	0	0.00592045	0.143789	0	0.592555	Superficial_Epithelial_0dpa
anxa5b#chr1:22654617-22655989	chr1:22654617-22655989	TSS	0	anxa5b	MA1101.2	chr1:22655595-22655613	-0.0615179	0.101639	0.388639	bach2b	0.0657534	bach2b->anxa5b	13.58	0.153345	0	0	0.209666	0.102281	0	0.616603	Superficial_Epithelial_0dpa
anxa5b#chr1:22654617-22655989	chr1:22654617-22655989	TSS	0	anxa5b	MA1101.2	chr1:22655595-22655613	-0.0615179	0.101639	0.388639	bach2b	0.0657534	bach2b->anxa5b	13.58	0.153345	0	0	0.209666	0.102281	0	0.616603	Superficial_Epithelial_0dpa
aopep#chr8:30241816-30243384	chr8:30241816-30243384	Body	0.232	aopep	MA1470.1	chr8:30242196-30242215	-0.0489674	0.089848	0.056579	bach2b	0.193379	bach2b->aopep	13.3609	0.133717	0	0	0.209666	0.679116	0	0.831328	Superficial_Epithelial_0dpa
aopep#chr8:30241816-30243384	chr8:30241816-30243384	Body	0.232	aopep	MA0480.2	chr8:30242298-30242308	-0.103271	0.148817	0.079231	foxo1a	0.0795932	foxo1a->aopep	5.7373	0.10065	0	0	2.13262	0.679116	0	0.831328	Superficial_Epithelial_0dpa
aopep#chr8:30204008-30205271	chr8:30204008-30205271	TSS	0	aopep	MA1101.2	chr8:30204639-30204657	-0.0272841	0.119538	0.0909363	bach2b	0.0657534	bach2b->aopep	13.3609	0.133717	0	0	0.209666	0.679116	0	0.360786	Superficial_Epithelial_0dpa
aopep#chr8:30204008-30205271	chr8:30204008-30205271	TSS	0	aopep	MA1101.2	chr8:30204639-30204657	-0.0272841	0.119538	0.0909363	bach2b	0.0657534	bach2b->aopep	13.3609	0.133717	0	0	0.209666	0.679116	0	0.360786	Superficial_Epithelial_0dpa
aopep#chr8:30204008-30205271	chr8:30204008-30205271	TSS	0	aopep	MA1515.1	chr8:30204711-30204721	-0.0232959	0.15324	0.0329775	klf2b	0.107486	klf2b->aopep	1.65817	0.0713123	0	0	1.42664	0.679116	0	0.360786	Superficial_Epithelial_0dpa
aopep#chr8:30241816-30243384	chr8:30241816-30243384	TSS	0.232	aopep	MA1470.1	chr8:30242196-30242215	-0.0489674	0.089848	0.056579	bach2b	0.193379	bach2b->aopep	13.3609	0.133717	0	0	0.209666	0.679116	0	0.831328	Superficial_Epithelial_0dpa
aopep#chr8:30241816-30243384	chr8:30241816-30243384	TSS	0.232	aopep	MA0480.2	chr8:30242298-30242308	-0.103271	0.148817	0.079231	foxo1a	0.0795932	foxo1a->aopep	5.7373	0.10065	0	0	2.13262	0.679116	0	0.831328	Superficial_Epithelial_0dpa
aopep#chr8:30283722-30285471	chr8:30283722-30285471	TSS	0	aopep	MA1515.1	chr8:30284553-30284563	-0.0825415	0.073143	0.144646	klf2b	0.107486	klf2b->aopep	1.65817	0.0713123	0	0	1.42664	0.679116	0	0.524366	Superficial_Epithelial_0dpa
aplp1#chr15:37131512-37132513	chr15:37131512-37132513	Body	0.181	aplp1	MA0511.2	chr15:37132092-37132100	-0.0877528	0.0336633	0.407694	runx2a	0.0567643	runx2a->aplp1	6.08896	0.120853	0	0	0.105006	0.327197	0	0.848557	Superficial_Epithelial_0dpa
aplp1#chr15:37131512-37132513	chr15:37131512-37132513	Body	0.181	aplp1	MA1470.1	chr15:37131924-37131943	-0.0822671	0.0650538	0.155183	bach2b	0.193379	bach2b->aplp1	55.8807	0.310204	0	0	0.209666	0.327197	0	0.848557	Superficial_Epithelial_0dpa
aplp1#chr15:37172778-37173440	chr15:37172778-37173440	Body	0.17	aplp1	MA1101.2	chr15:37172991-37173009	-0.0926063	0.0992028	0.183737	bach2b	0.0657534	bach2b->aplp1	55.8807	0.310204	0	0	0.209666	0.327197	0	0.675407	Superficial_Epithelial_0dpa
aplp1#chr15:37172778-37173440	chr15:37172778-37173440	Body	0.17	aplp1	MA1101.2	chr15:37172991-37173009	-0.0926063	0.0992028	0.183737	bach2b	0.0657534	bach2b->aplp1	55.8807	0.310204	0	0	0.209666	0.327197	0	0.675407	Superficial_Epithelial_0dpa
aplp1#chr15:37172778-37173440	chr15:37172778-37173440	Body	0.17	aplp1	MA1470.1	chr15:37173255-37173274	0.109236	0.205886	0.0567962	bach2b	0.193379	bach2b->aplp1	55.8807	0.310204	0	0	0.209666	0.327197	0	0.675407	Superficial_Epithelial_0dpa
apoeb#chr16:23960527-23961970	chr16:23960527-23961970	Body	0.202	apoeb	MA0059.1	chr16:23960819-23960829	-0.0984146	0.108737	0.18169	max	0.0600174	max->apoeb	3.04326	0.0685689	0	0	0.485417	0.750737	0	0.247431	Superficial_Epithelial_0dpa
apoeb#chr16:23960527-23961970	chr16:23960527-23961970	Body	0.202	apoeb	MA0059.1	chr16:23960820-23960830	-0.128985	0.161973	0.217028	max	0.0600174	max->apoeb	3.04326	0.0685689	0	0	0.485417	0.750737	0	0.247431	Superficial_Epithelial_0dpa
apoeb#chr16:23960527-23961970	chr16:23960527-23961970	Body	0.202	apoeb	MA0058.3	chr16:23960820-23960829	-0.126155	0.184574	0.218016	max	0.0781341	max->apoeb	3.04326	0.0685689	0	0	0.485417	0.750737	0	0.247431	Superficial_Epithelial_0dpa
apoeb#chr16:23960527-23961970	chr16:23960527-23961970	Body	0.202	apoeb	MA0147.3	chr16:23960819-23960830	-0.103321	0.123471	0.183586	mycb	0.052455	mycb->apoeb	3.37578	0.0766887	0	0	0.281657	0.750737	0	0.247431	Superficial_Epithelial_0dpa
apoeb#chr16:23960527-23961970	chr16:23960527-23961970	Body	0.202	apoeb	MA1101.2	chr16:23960633-23960651	-0.0303153	0.0434478	0.148274	bach2b	0.0657534	bach2b->apoeb	12.6332	0.140458	0	0	0.209666	0.750737	0	0.247431	Superficial_Epithelial_0dpa
apoeb#chr16:23960527-23961970	chr16:23960527-23961970	Body	0.202	apoeb	MA1101.2	chr16:23960633-23960651	-0.0303153	0.0434478	0.148274	bach2b	0.0657534	bach2b->apoeb	12.6332	0.140458	0	0	0.209666	0.750737	0	0.247431	Superficial_Epithelial_0dpa
apoeb#chr16:23960527-23961970	chr16:23960527-23961970	TSS	0.202	apoeb	MA0059.1	chr16:23960819-23960829	-0.0984146	0.108737	0.18169	max	0.0600174	max->apoeb	3.04326	0.0685689	0	0	0.485417	0.750737	0	0.247431	Superficial_Epithelial_0dpa
apoeb#chr16:23960527-23961970	chr16:23960527-23961970	TSS	0.202	apoeb	MA0059.1	chr16:23960820-23960830	-0.128985	0.161973	0.217028	max	0.0600174	max->apoeb	3.04326	0.0685689	0	0	0.485417	0.750737	0	0.247431	Superficial_Epithelial_0dpa
apoeb#chr16:23960527-23961970	chr16:23960527-23961970	TSS	0.202	apoeb	MA0058.3	chr16:23960820-23960829	-0.126155	0.184574	0.218016	max	0.0781341	max->apoeb	3.04326	0.0685689	0	0	0.485417	0.750737	0	0.247431	Superficial_Epithelial_0dpa
apoeb#chr16:23960527-23961970	chr16:23960527-23961970	TSS	0.202	apoeb	MA0147.3	chr16:23960819-23960830	-0.103321	0.123471	0.183586	mycb	0.052455	mycb->apoeb	3.37578	0.0766887	0	0	0.281657	0.750737	0	0.247431	Superficial_Epithelial_0dpa
apoeb#chr16:23960527-23961970	chr16:23960527-23961970	TSS	0.202	apoeb	MA1101.2	chr16:23960633-23960651	-0.0303153	0.0434478	0.148274	bach2b	0.0657534	bach2b->apoeb	12.6332	0.140458	0	0	0.209666	0.750737	0	0.247431	Superficial_Epithelial_0dpa
apoeb#chr16:23960527-23961970	chr16:23960527-23961970	TSS	0.202	apoeb	MA1101.2	chr16:23960633-23960651	-0.0303153	0.0434478	0.148274	bach2b	0.0657534	bach2b->apoeb	12.6332	0.140458	0	0	0.209666	0.750737	0	0.247431	Superficial_Epithelial_0dpa
aqp3a#chr5:43007317-43008974	chr5:43007317-43008974	TSS	0.162	aqp3a	MA0670.1	chr5:43008502-43008511	-0.00389385	0.16728	0.0701821	nfia	0.0599502	nfia->aqp3a	1.51185	0.111112	0	0	0.0965304	0.932888	0	0.790496	Superficial_Epithelial_0dpa
arap1a#chr5:23908885-23910668	chr5:23908885-23910668	TSS	0	arap1a	MA0073.1	chr5:23909970-23909989	-0.527631	0.726658	0.804464	rreb1a	0.0500665	rreb1a->arap1a	3.15378	0.089585	0	0	0.266798	0.401842	0	4.18146	Superficial_Epithelial_0dpa
arap1a#chr5:23908885-23910668	chr5:23908885-23910668	TSS	0	arap1a	MA0073.1	chr5:23909972-23909991	-0.526963	0.71711	0.822664	rreb1a	0.0500665	rreb1a->arap1a	3.15378	0.089585	0	0	0.266798	0.401842	0	4.18146	Superficial_Epithelial_0dpa
arap1a#chr5:23908885-23910668	chr5:23908885-23910668	TSS	0	arap1a	MA0073.1	chr5:23909974-23909993	-0.561697	0.727128	0.953027	rreb1a	0.0500665	rreb1a->arap1a	3.15378	0.089585	0	0	0.266798	0.401842	0	4.18146	Superficial_Epithelial_0dpa
arap1a#chr5:23908885-23910668	chr5:23908885-23910668	TSS	0	arap1a	MA0073.1	chr5:23909976-23909995	-0.50009	0.628736	0.904955	rreb1a	0.0500665	rreb1a->arap1a	3.15378	0.089585	0	0	0.266798	0.401842	0	4.18146	Superficial_Epithelial_0dpa
arap1a#chr5:23908885-23910668	chr5:23908885-23910668	TSS	0	arap1a	MA0073.1	chr5:23909978-23909997	-0.456206	0.538003	0.857483	rreb1a	0.0500665	rreb1a->arap1a	3.15378	0.089585	0	0	0.266798	0.401842	0	4.18146	Superficial_Epithelial_0dpa
arap1a#chr5:23908885-23910668	chr5:23908885-23910668	TSS	0	arap1a	MA0073.1	chr5:23909980-23909999	-0.177459	0.226526	0.489834	rreb1a	0.0500665	rreb1a->arap1a	3.15378	0.089585	0	0	0.266798	0.401842	0	4.18146	Superficial_Epithelial_0dpa
arf1#chr2:3075794-3077532	chr2:3075794-3077532	TSS	0	arf1	MA1933.1	chr2:3076814-3076829	-0.141869	0.307993	0.105371	elk1	0.0811215	elk1->arf1	1.90023	0.0388268	0	0	0.111184	0.885297	0	1.34054	Superficial_Epithelial_0dpa
arf1#chr2:3075794-3077532	chr2:3075794-3077532	TSS	0	arf1	MA1933.1	chr2:3077019-3077034	-0.103875	0.234078	0.581837	elk1	0.0811215	elk1->arf1	1.90023	0.0388268	0	0	0.111184	0.885297	0	1.34054	Superficial_Epithelial_0dpa
arf5#chr18:7542797-7543764	chr18:7542797-7543764	TSS	0	arf5	MA0478.1	chr18:7542942-7542952	-0.162575	-0.104157	0.557664	fosl2	0.0934041	fosl2->arf5	4.58681	0.0768572	0	0	1.62846	1.12508	0	1.91643	Superficial_Epithelial_0dpa
arfgef1#chr24:18875390-18877381	chr24:18875390-18877381	TSS	0	arfgef1	MA0834.1	chr24:18877070-18877083	-0.1968	0.551105	0.703195	atf7a	0.0802065	atf7a->arfgef1	2.18232	0.0461231	0	0	0.0801932	0.633562	0	1.45609	Superficial_Epithelial_0dpa
arfgef1#chr24:18875390-18877381	chr24:18875390-18877381	TSS	0	arfgef1	MA0834.1	chr24:18877070-18877083	-0.1968	0.551105	0.703195	atf7a	0.0802065	atf7a->arfgef1	2.18232	0.0461231	0	0	0.0801932	0.633562	0	1.45609	Superficial_Epithelial_0dpa
arfgef1#chr24:18875390-18877381	chr24:18875390-18877381	TSS	0	arfgef1	MA1127.1	chr24:18877071-18877081	-0.261002	0.789302	0.834521	fosb	0.150449	fosb->arfgef1	6.05632	0.0829316	0	0	2.01852	0.633562	0	1.45609	Superficial_Epithelial_0dpa
arfgef1#chr24:18875390-18877381	chr24:18875390-18877381	TSS	0	arfgef1	MA1127.1	chr24:18877072-18877082	-0.326727	0.886637	0.994469	fosb	0.150449	fosb->arfgef1	6.05632	0.0829316	0	0	2.01852	0.633562	0	1.45609	Superficial_Epithelial_0dpa
arfgef1#chr24:18875390-18877381	chr24:18875390-18877381	TSS	0	arfgef1	MA1136.1	chr24:18877072-18877081	-0.358722	1.03061	0.964662	fosb	0.133295	fosb->arfgef1	6.05632	0.0829316	0	0	2.01852	0.633562	0	1.45609	Superficial_Epithelial_0dpa
arfgef1#chr24:18875390-18877381	chr24:18875390-18877381	TSS	0	arfgef1	MA1136.1	chr24:18877072-18877081	-0.358722	1.03061	0.964662	fosb	0.133295	fosb->arfgef1	6.05632	0.0829316	0	0	2.01852	0.633562	0	1.45609	Superficial_Epithelial_0dpa
arfgef1#chr24:18875390-18877381	chr24:18875390-18877381	TSS	0	arfgef1	MA0609.2	chr24:18877069-18877084	-0.0470268	0.291887	0.430722	crema	0.0998319	crema->arfgef1	1.21445	0.0544886	0	0	1.34056	0.633562	0	1.45609	Superficial_Epithelial_0dpa
arfgef1#chr24:18875390-18877381	chr24:18875390-18877381	TSS	0	arfgef1	MA0609.2	chr24:18877069-18877084	-0.0470268	0.291887	0.430722	crema	0.0998319	crema->arfgef1	1.21445	0.0544886	0	0	1.34056	0.633562	0	1.45609	Superficial_Epithelial_0dpa
arfgef1#chr24:18875390-18877381	chr24:18875390-18877381	TSS	0	arfgef1	MA1951.1	chr24:18877070-18877083	-0.1968	0.551105	0.703195	fosab	0.154414	fosab->arfgef1	16.9063	0.118706	0	0	2.65236	0.633562	0	1.45609	Superficial_Epithelial_0dpa
arg2#chr13:33024156-33025080	chr13:33024156-33025080	TSS	0	arg2	MA1515.1	chr13:33024444-33024454	-0.00354532	1.86041	0.683672	klf2b	0.107486	klf2b->arg2	12.103	0.0999541	0	0	1.42664	1.64645	0	2.67935	Superficial_Epithelial_0dpa
arhgap10#chr1:36771560-36773344	chr1:36771560-36773344	Body	0.163	arhgap10	MA0006.1	chr1:36772758-36772763	0.0107981	-0.00402939	0.323021	arnt	0.0564374	arnt->arhgap10	1.71475	0.0426675	0	0	0.282055	0.328833	0	0.706067	Superficial_Epithelial_0dpa
arhgap10#chr1:36771560-36773344	chr1:36771560-36773344	TSS	0.163	arhgap10	MA0006.1	chr1:36772758-36772763	0.0107981	-0.00402939	0.323021	arnt	0.0564374	arnt->arhgap10	1.71475	0.0426675	0	0	0.282055	0.328833	0	0.706067	Superficial_Epithelial_0dpa
arhgap17b#chr3:18579344-18580788	chr3:18579344-18580788	TSS	0	arhgap17b	MA0481.3	chr3:18580414-18580424	-0.0331985	0.106075	0.0312388	foxp1b	0.0976319	foxp1b->arhgap17b	1.17836	0.0590525	0	0	0.0287816	0.358173	0	1.64698	Superficial_Epithelial_0dpa
arhgap23a#chr3:39361702-39362607	chr3:39361702-39362607	TSS	0	arhgap23a	MA0511.2	chr3:39362064-39362072	0.0885456	0.0621044	0.350295	runx2a	0.0567643	runx2a->arhgap23a	1.51864	0.0488045	0	0	0.105006	0.644969	0	1.55348	Superficial_Epithelial_0dpa
arhgap27#chr12:4971118-4972113	chr12:4971118-4972113	TSS	0	arhgap27	MA0591.1	chr12:4971906-4971920	0.00405632	0.571304	0.149977	bach1b	0.0525138	bach1b->arhgap27	2.10904	0.0652171	0	0	0.925602	0.90976	0	2.44682	Superficial_Epithelial_0dpa
arhgap27#chr12:4971118-4972113	chr12:4971118-4972113	TSS	0	arhgap27	MA1955.1	chr12:4971392-4971405	0.0891298	0.094055	0.801865	elk3	0.0570459	elk3->arhgap27	3.54961	0.0685895	0	0	0.322853	0.90976	0	2.44682	Superficial_Epithelial_0dpa
arhgap27#chr12:4971118-4972113	chr12:4971118-4972113	TSS	0	arhgap27	MA1633.2	chr12:4971570-4971578	0.355145	0.770236	-0.588435	bach1b	0.0601907	bach1b->arhgap27	2.10904	0.0652171	0	0	0.925602	0.90976	0	2.44682	Superficial_Epithelial_0dpa
arhgap27l#chr3:22376181-22378237	chr3:22376181-22378237	TSS	0	arhgap27l	MA0640.2	chr3:22377130-22377143	-0.479823	0.317006	1.09938	elf3	0.0502292	elf3->arhgap27l	5.26809	0.0724987	0	0	1.46398	0.459008	0	2.4642	Superficial_Epithelial_0dpa
arhgap27l#chr3:22376181-22378237	chr3:22376181-22378237	TSS	0	arhgap27l	MA0640.2	chr3:22377186-22377199	0.327379	0.29218	0.247023	elf3	0.0502292	elf3->arhgap27l	5.26809	0.0724987	0	0	1.46398	0.459008	0	2.4642	Superficial_Epithelial_0dpa
arhgap29b#chr2:15128097-15129425	chr2:15128097-15129425	TSS	0	arhgap29b	MA1470.1	chr2:15128726-15128745	-0.0897439	0.0740024	0.133353	bach2b	0.193379	bach2b->arhgap29b	14.03	0.123826	0	0	0.209666	0.409187	0	1.25496	Superficial_Epithelial_0dpa
arhgap33#chr16:44835238-44836196	chr16:44835238-44836196	Body	0.174	arhgap33	MA0525.2	chr16:44835488-44835505	-0.0875859	0.119454	0.101703	tp63	0.180472	tp63->arhgap33	6.34419	0.158946	0	0	0.439364	0.0252318	0	0.225676	Superficial_Epithelial_0dpa
arhgap33#chr16:44835238-44836196	chr16:44835238-44836196	Body	0.174	arhgap33	MA0525.2	chr16:44835488-44835505	-0.0875859	0.119454	0.101703	tp63	0.180472	tp63->arhgap33	6.34419	0.158946	0	0	0.439364	0.0252318	0	0.225676	Superficial_Epithelial_0dpa
arhgap33#chr16:44876029-44878006	chr16:44876029-44878006	Body	0.107	arhgap33	MA0734.3	chr16:44877383-44877395	-0.0127845	0.116785	-0.0139034	gli2a	0.101933	gli2a->arhgap33	1.31143	0.118876	0	0	0.0506187	0.0252318	0	0.400581	Superficial_Epithelial_0dpa
arhgap33#chr16:44876029-44878006	chr16:44876029-44878006	TSS	0.107	arhgap33	MA0734.3	chr16:44877383-44877395	-0.0127845	0.116785	-0.0139034	gli2a	0.101933	gli2a->arhgap33	1.31143	0.118876	0	0	0.0506187	0.0252318	0	0.400581	Superficial_Epithelial_0dpa
arhgap5#chr17:31738805-31740980	chr17:31738805-31740980	TSS	0	arhgap5	MA1101.2	chr17:31740807-31740825	-0.0315526	0.0569277	0.0879798	bach2b	0.0657534	bach2b->arhgap5	1.68928	0.0677402	0	0	0.209666	0.408086	0	1.41243	Superficial_Epithelial_0dpa
arhgap5#chr17:31738805-31740980	chr17:31738805-31740980	TSS	0	arhgap5	MA1101.2	chr17:31740807-31740825	-0.0315526	0.0569277	0.0879798	bach2b	0.0657534	bach2b->arhgap5	1.68928	0.0677402	0	0	0.209666	0.408086	0	1.41243	Superficial_Epithelial_0dpa
arhgef11#chr7:5486553-5488306	chr7:5486553-5488306	TSS	0	arhgef11	MA1136.1	chr7:5486719-5486728	-0.0346177	0.241949	0.225344	fosb	0.133295	fosb->arhgef11	2.96998	0.0853385	0	0	2.01852	0.283473	0	1.3553	Superficial_Epithelial_0dpa
arhgef18a#chr2:37536648-37538018	chr2:37536648-37538018	TSS	0	arhgef18a	MA1633.2	chr2:37536826-37536834	-0.0502585	0.108222	0.264925	bach1b	0.0601907	bach1b->arhgef18a	6.07911	0.076265	0	0	0.925602	1.32566	0	2.07934	Superficial_Epithelial_0dpa
arhgef38#chr1:26411309-26413538	chr1:26411309-26413538	TSS	0	arhgef38	MA1955.1	chr1:26412661-26412674	-0.131238	0.427054	0.0168576	elk3	0.0570459	elk3->arhgef38	1.20731	0.0397367	0	0	0.322853	1.14844	0	6.41474	Superficial_Epithelial_0dpa
arhgef4#chr2:16358399-16359409	chr2:16358399-16359409	TSS	0	arhgef4	MA1470.1	chr2:16359070-16359089	-0.068746	0.0106336	0.0990245	bach2b	0.193379	bach2b->arhgef4	39.2012	0.223436	0	0	0.209666	1.27486	0	1.54021	Superficial_Epithelial_0dpa
arid6#chr21:11243700-11244436	chr21:11243700-11244436	TSS	0	arid6	MA1129.1	chr21:11243786-11243795	-0.19791	0.680073	0.48163	jun	0.0526979	jun->arid6	4.53178	0.0851606	0	0	2.12638	0.488775	0	3.20689	Superficial_Epithelial_0dpa
arid6#chr21:11243700-11244436	chr21:11243700-11244436	TSS	0	arid6	MA1129.1	chr21:11243786-11243795	-0.19791	0.680073	0.48163	jun	0.0526979	jun->arid6	4.53178	0.0851606	0	0	2.12638	0.488775	0	3.20689	Superficial_Epithelial_0dpa
arid6#chr21:11243700-11244436	chr21:11243700-11244436	TSS	0	arid6	MA1133.1	chr21:11243785-11243796	-0.164925	0.705965	0.53072	jun	0.05518	jun->arid6	4.53178	0.0851606	0	0	2.12638	0.488775	0	3.20689	Superficial_Epithelial_0dpa
arl4d#chr12:27242354-27243512	chr12:27242354-27243512	TSS	0	arl4d	MA0656.1	chr12:27242537-27242548	0.0170587	0.436095	-0.0700702	jdp2b	0.138912	jdp2b->arl4d	3.39823	0.0798355	0	0	1.27829	0.546663	0	1.58225	Superficial_Epithelial_0dpa
arl4d#chr12:27242354-27243512	chr12:27242354-27243512	TSS	0	arl4d	MA0656.1	chr12:27243116-27243127	-0.307495	0.699594	1.09547	jdp2b	0.138912	jdp2b->arl4d	3.39823	0.0798355	0	0	1.27829	0.546663	0	1.58225	Superficial_Epithelial_0dpa
arl4d#chr12:27242354-27243512	chr12:27242354-27243512	TSS	0	arl4d	MA0656.1	chr12:27242537-27242548	0.0170587	0.436095	-0.0700702	jdp2b	0.138912	jdp2b->arl4d	3.39823	0.0798355	0	0	1.27829	0.546663	0	1.58225	Superficial_Epithelial_0dpa
arl4d#chr12:27242354-27243512	chr12:27242354-27243512	TSS	0	arl4d	MA0656.1	chr12:27243116-27243127	-0.307495	0.699594	1.09547	jdp2b	0.138912	jdp2b->arl4d	3.39823	0.0798355	0	0	1.27829	0.546663	0	1.58225	Superficial_Epithelial_0dpa
arl4d#chr12:27242354-27243512	chr12:27242354-27243512	TSS	0	arl4d	MA1126.1	chr12:27242537-27242552	-0.0493696	0.446345	0.015138	fosab	0.10646	fosab->arl4d	14.0422	0.115196	0	0	2.65236	0.546663	0	1.58225	Superficial_Epithelial_0dpa
arl4d#chr12:27242354-27243512	chr12:27242354-27243512	TSS	0	arl4d	MA1126.1	chr12:27242533-27242548	-0.0775338	0.49289	0.0242394	fosab	0.10646	fosab->arl4d	14.0422	0.115196	0	0	2.65236	0.546663	0	1.58225	Superficial_Epithelial_0dpa
arl4d#chr12:27242354-27243512	chr12:27242354-27243512	TSS	0	arl4d	MA1133.1	chr12:27242537-27242548	0.0170587	0.436095	-0.0700702	junbb	0.090798	junbb->arl4d	5.15762	0.0895944	0	0	1.09612	0.546663	0	1.58225	Superficial_Epithelial_0dpa
arl4d#chr12:27242354-27243512	chr12:27242354-27243512	TSS	0	arl4d	MA1133.1	chr12:27243116-27243127	-0.307495	0.699594	1.09547	junbb	0.090798	junbb->arl4d	5.15762	0.0895944	0	0	1.09612	0.546663	0	1.58225	Superficial_Epithelial_0dpa
arl4d#chr12:27242354-27243512	chr12:27242354-27243512	TSS	0	arl4d	MA1133.1	chr12:27242537-27242548	0.0170587	0.436095	-0.0700702	junbb	0.090798	junbb->arl4d	5.15762	0.0895944	0	0	1.09612	0.546663	0	1.58225	Superficial_Epithelial_0dpa
arl4d#chr12:27242354-27243512	chr12:27242354-27243512	TSS	0	arl4d	MA1133.1	chr12:27243116-27243127	-0.307495	0.699594	1.09547	junbb	0.090798	junbb->arl4d	5.15762	0.0895944	0	0	1.09612	0.546663	0	1.58225	Superficial_Epithelial_0dpa
arl4d#chr12:27242354-27243512	chr12:27242354-27243512	TSS	0	arl4d	MA1136.1	chr12:27242538-27242547	0.00380532	0.43311	-0.07745	junbb	0.0827228	junbb->arl4d	5.15762	0.0895944	0	0	1.09612	0.546663	0	1.58225	Superficial_Epithelial_0dpa
arl4d#chr12:27242354-27243512	chr12:27242354-27243512	TSS	0	arl4d	MA1136.1	chr12:27242538-27242547	0.00380532	0.43311	-0.07745	junba	0.0510403	junba->arl4d	1.07687	0.0385578	0	0	1.93563	0.546663	0	1.58225	Superficial_Epithelial_0dpa
arl4d#chr12:27242354-27243512	chr12:27242354-27243512	TSS	0	arl4d	MA1136.1	chr12:27243117-27243126	-0.334922	0.595753	1.26762	junbb	0.0827228	junbb->arl4d	5.15762	0.0895944	0	0	1.09612	0.546663	0	1.58225	Superficial_Epithelial_0dpa
arl4d#chr12:27242354-27243512	chr12:27242354-27243512	TSS	0	arl4d	MA1136.1	chr12:27243117-27243126	-0.334922	0.595753	1.26762	junba	0.0510403	junba->arl4d	1.07687	0.0385578	0	0	1.93563	0.546663	0	1.58225	Superficial_Epithelial_0dpa
arl4d#chr12:27242354-27243512	chr12:27242354-27243512	TSS	0	arl4d	MA1136.1	chr12:27242538-27242547	0.00380532	0.43311	-0.07745	junbb	0.0827228	junbb->arl4d	5.15762	0.0895944	0	0	1.09612	0.546663	0	1.58225	Superficial_Epithelial_0dpa
arl4d#chr12:27242354-27243512	chr12:27242354-27243512	TSS	0	arl4d	MA1136.1	chr12:27242538-27242547	0.00380532	0.43311	-0.07745	junba	0.0510403	junba->arl4d	1.07687	0.0385578	0	0	1.93563	0.546663	0	1.58225	Superficial_Epithelial_0dpa
arl4d#chr12:27242354-27243512	chr12:27242354-27243512	TSS	0	arl4d	MA1136.1	chr12:27243117-27243126	-0.334922	0.595753	1.26762	junbb	0.0827228	junbb->arl4d	5.15762	0.0895944	0	0	1.09612	0.546663	0	1.58225	Superficial_Epithelial_0dpa
arl4d#chr12:27242354-27243512	chr12:27242354-27243512	TSS	0	arl4d	MA1136.1	chr12:27243117-27243126	-0.334922	0.595753	1.26762	junba	0.0510403	junba->arl4d	1.07687	0.0385578	0	0	1.93563	0.546663	0	1.58225	Superficial_Epithelial_0dpa
arl4d#chr12:27242354-27243512	chr12:27242354-27243512	TSS	0	arl4d	MA1139.1	chr12:27242537-27242548	0.0170587	0.436095	-0.0700702	junbb	0.0817679	junbb->arl4d	5.15762	0.0895944	0	0	1.09612	0.546663	0	1.58225	Superficial_Epithelial_0dpa
arl4d#chr12:27242354-27243512	chr12:27242354-27243512	TSS	0	arl4d	MA1139.1	chr12:27243116-27243127	-0.307495	0.699594	1.09547	junbb	0.0817679	junbb->arl4d	5.15762	0.0895944	0	0	1.09612	0.546663	0	1.58225	Superficial_Epithelial_0dpa
arl4d#chr12:27242354-27243512	chr12:27242354-27243512	TSS	0	arl4d	MA1139.1	chr12:27242537-27242548	0.0170587	0.436095	-0.0700702	junbb	0.0817679	junbb->arl4d	5.15762	0.0895944	0	0	1.09612	0.546663	0	1.58225	Superficial_Epithelial_0dpa
arl4d#chr12:27242354-27243512	chr12:27242354-27243512	TSS	0	arl4d	MA1139.1	chr12:27243116-27243127	-0.307495	0.699594	1.09547	junbb	0.0817679	junbb->arl4d	5.15762	0.0895944	0	0	1.09612	0.546663	0	1.58225	Superficial_Epithelial_0dpa
arl4d#chr12:27242354-27243512	chr12:27242354-27243512	TSS	0	arl4d	MA1140.2	chr12:27242537-27242548	0.0170587	0.436095	-0.0700702	junbb	0.0902616	junbb->arl4d	5.15762	0.0895944	0	0	1.09612	0.546663	0	1.58225	Superficial_Epithelial_0dpa
arl4d#chr12:27242354-27243512	chr12:27242354-27243512	TSS	0	arl4d	MA1140.2	chr12:27243116-27243127	-0.307495	0.699594	1.09547	junbb	0.0902616	junbb->arl4d	5.15762	0.0895944	0	0	1.09612	0.546663	0	1.58225	Superficial_Epithelial_0dpa
arl4d#chr12:27242354-27243512	chr12:27242354-27243512	TSS	0	arl4d	MA1140.2	chr12:27242537-27242548	0.0170587	0.436095	-0.0700702	junbb	0.0902616	junbb->arl4d	5.15762	0.0895944	0	0	1.09612	0.546663	0	1.58225	Superficial_Epithelial_0dpa
arl4d#chr12:27242354-27243512	chr12:27242354-27243512	TSS	0	arl4d	MA1140.2	chr12:27243116-27243127	-0.307495	0.699594	1.09547	junbb	0.0902616	junbb->arl4d	5.15762	0.0895944	0	0	1.09612	0.546663	0	1.58225	Superficial_Epithelial_0dpa
arl4d#chr12:27242354-27243512	chr12:27242354-27243512	TSS	0	arl4d	MA0609.2	chr12:27242535-27242550	-0.153345	0.594998	0.109544	crema	0.0998319	crema->arl4d	1.14411	0.0490974	0	0	1.34056	0.546663	0	1.58225	Superficial_Epithelial_0dpa
arl4d#chr12:27242354-27243512	chr12:27242354-27243512	TSS	0	arl4d	MA0609.2	chr12:27242535-27242550	-0.153345	0.594998	0.109544	crema	0.0998319	crema->arl4d	1.14411	0.0490974	0	0	1.34056	0.546663	0	1.58225	Superficial_Epithelial_0dpa
arl4d#chr12:27242354-27243512	chr12:27242354-27243512	TSS	0	arl4d	MA1951.1	chr12:27242536-27242549	-0.131612	0.57485	0.0892617	fosab	0.154414	fosab->arl4d	14.0422	0.115196	0	0	2.65236	0.546663	0	1.58225	Superficial_Epithelial_0dpa
arl4d#chr12:27242354-27243512	chr12:27242354-27243512	TSS	0	arl4d	MA1951.1	chr12:27242536-27242549	-0.131612	0.57485	0.0892617	fosab	0.154414	fosab->arl4d	14.0422	0.115196	0	0	2.65236	0.546663	0	1.58225	Superficial_Epithelial_0dpa
arl6ip5b#chr23:4253549-4254792	chr23:4253549-4254792	TSS	0	arl6ip5b	MA1515.1	chr23:4253956-4253966	0.790656	0.358444	-0.165297	klf2b	0.107486	klf2b->arl6ip5b	2.03886	0.046423	0	0	1.42664	0.67573	0	2.26983	Superficial_Epithelial_0dpa
arrdc1a#chr5:29531254-29532008	chr5:29531254-29532008	TSS	0	arrdc1a	MA0609.2	chr5:29531963-29531978	-0.798768	2.17234	1.08491	crema	0.0998319	crema->arrdc1a	7.32898	0.074975	0	0	1.34056	1.44705	0	2.02914	Superficial_Epithelial_0dpa
arrdc1a#chr5:29531254-29532008	chr5:29531254-29532008	TSS	0	arrdc1a	MA0609.2	chr5:29531963-29531978	-0.798768	2.17234	1.08491	crema	0.0998319	crema->arrdc1a	7.32898	0.074975	0	0	1.34056	1.44705	0	2.02914	Superficial_Epithelial_0dpa
arrdc1b#chr21:14762245-14763231	chr21:14762245-14763231	TSS	0	arrdc1b	MA1131.1	chr21:14763075-14763085	-0.637186	1.91771	0.783288	fosl2	0.0630162	fosl2->arrdc1b	1.09797	0.0698073	0	0	1.62846	1.73039	0	1.84388	Superficial_Epithelial_0dpa
arrdc1b#chr21:14762245-14763231	chr21:14762245-14763231	TSS	0	arrdc1b	MA1131.1	chr21:14763076-14763086	-0.511241	1.75452	0.615361	fosl2	0.0630162	fosl2->arrdc1b	1.09797	0.0698073	0	0	1.62846	1.73039	0	1.84388	Superficial_Epithelial_0dpa
arrdc1b#chr21:14762245-14763231	chr21:14762245-14763231	TSS	0	arrdc1b	MA1139.1	chr21:14763075-14763086	-0.468637	1.81901	0.518369	fosl2	0.0569617	fosl2->arrdc1b	1.09797	0.0698073	0	0	1.62846	1.73039	0	1.84388	Superficial_Epithelial_0dpa
arrdc1b#chr21:14762245-14763231	chr21:14762245-14763231	TSS	0	arrdc1b	MA1139.1	chr21:14763075-14763086	-0.468637	1.81901	0.518369	fosl2	0.0569617	fosl2->arrdc1b	1.09797	0.0698073	0	0	1.62846	1.73039	0	1.84388	Superficial_Epithelial_0dpa
arrdc3a#chr5:48993168-48996877	chr5:48993168-48996877	TSS	0	arrdc3a	MA1117.1	chr5:48996268-48996278	-0.0903108	0.102322	0.129389	relb	0.127546	relb->arrdc3a	10.7556	0.0915324	0	0	0.585144	0.284581	0	1.64445	Superficial_Epithelial_0dpa
arrdc3a#chr5:48993168-48996877	chr5:48993168-48996877	TSS	0	arrdc3a	MA1470.1	chr5:48994852-48994871	0.101278	0.153063	0.505332	bach2b	0.193379	bach2b->arrdc3a	1.38649	0.0560516	0	0	0.209666	0.284581	0	1.64445	Superficial_Epithelial_0dpa
asap3#chr17:27199521-27200593	chr17:27199521-27200593	Body	0.102	asap3	MA0525.2	chr17:27199828-27199845	0.0235016	0.267391	0.0964246	tp63	0.180472	tp63->asap3	5.7154	0.109867	0	0	0.439364	0.523043	0	1.2178	Superficial_Epithelial_0dpa
asap3#chr17:27199521-27200593	chr17:27199521-27200593	Body	0.102	asap3	MA0525.2	chr17:27199828-27199845	0.0235016	0.267391	0.0964246	tp63	0.180472	tp63->asap3	5.7154	0.109867	0	0	0.439364	0.523043	0	1.2178	Superficial_Epithelial_0dpa
asap3#chr17:27223642-27224509	chr17:27223642-27224509	Body	0.111	asap3	MA0028.2	chr17:27223768-27223777	-0.0941277	0.388784	0.0280086	elk1	0.050474	elk1->asap3	1.93873	0.0638121	0	0	0.111184	0.523043	0	1.67033	Superficial_Epithelial_0dpa
asap3#chr17:27223642-27224509	chr17:27223642-27224509	Body	0.111	asap3	MA1116.1	chr17:27224300-27224309	-0.0332632	0.0174209	0.123466	rbpjb	0.0631204	rbpjb->asap3	1.18432	0.0632746	0	0	0.343833	0.523043	0	1.67033	Superficial_Epithelial_0dpa
asap3#chr17:27223642-27224509	chr17:27223642-27224509	Body	0.111	asap3	MA1932.1	chr17:27223762-27223777	-0.0702062	0.251388	0.0693931	elk1	0.054423	elk1->asap3	1.93873	0.0638121	0	0	0.111184	0.523043	0	1.67033	Superficial_Epithelial_0dpa
asap3#chr17:27199521-27200593	chr17:27199521-27200593	TSS	0.102	asap3	MA0525.2	chr17:27199828-27199845	0.0235016	0.267391	0.0964246	tp63	0.180472	tp63->asap3	5.7154	0.109867	0	0	0.439364	0.523043	0	1.2178	Superficial_Epithelial_0dpa
asap3#chr17:27199521-27200593	chr17:27199521-27200593	TSS	0.102	asap3	MA0525.2	chr17:27199828-27199845	0.0235016	0.267391	0.0964246	tp63	0.180472	tp63->asap3	5.7154	0.109867	0	0	0.439364	0.523043	0	1.2178	Superficial_Epithelial_0dpa
asap3#chr17:27204040-27205021	chr17:27204040-27205021	TSS	0	asap3	MA0525.2	chr17:27204489-27204506	0.0241849	0.0701559	0.0683202	tp63	0.180472	tp63->asap3	5.7154	0.109867	0	0	0.439364	0.523043	0	1.62646	Superficial_Epithelial_0dpa
asap3#chr17:27204040-27205021	chr17:27204040-27205021	TSS	0	asap3	MA0525.2	chr17:27204489-27204506	0.0241849	0.0701559	0.0683202	tp63	0.180472	tp63->asap3	5.7154	0.109867	0	0	0.439364	0.523043	0	1.62646	Superficial_Epithelial_0dpa
asap3#chr17:27204040-27205021	chr17:27204040-27205021	TSS	0	asap3	MA1116.1	chr17:27204410-27204419	-0.093027	0.0893009	0.0729783	rbpjb	0.0631204	rbpjb->asap3	1.18432	0.0632746	0	0	0.343833	0.523043	0	1.62646	Superficial_Epithelial_0dpa
asap3#chr17:27223642-27224509	chr17:27223642-27224509	TSS	0.111	asap3	MA0028.2	chr17:27223768-27223777	-0.0941277	0.388784	0.0280086	elk1	0.050474	elk1->asap3	1.93873	0.0638121	0	0	0.111184	0.523043	0	1.67033	Superficial_Epithelial_0dpa
asap3#chr17:27223642-27224509	chr17:27223642-27224509	TSS	0.111	asap3	MA1116.1	chr17:27224300-27224309	-0.0332632	0.0174209	0.123466	rbpjb	0.0631204	rbpjb->asap3	1.18432	0.0632746	0	0	0.343833	0.523043	0	1.67033	Superficial_Epithelial_0dpa
asap3#chr17:27223642-27224509	chr17:27223642-27224509	TSS	0.111	asap3	MA1932.1	chr17:27223762-27223777	-0.0702062	0.251388	0.0693931	elk1	0.054423	elk1->asap3	1.93873	0.0638121	0	0	0.111184	0.523043	0	1.67033	Superficial_Epithelial_0dpa
asap3#chr17:27235043-27236068	chr17:27235043-27236068	TSS	0	asap3	MA0600.2	chr17:27235566-27235581	-0.0230574	0.00454982	0.109745	rfx2	0.076513	rfx2->asap3	2.64174	0.0812842	0	0	0.545874	0.523043	0	1.79265	Superficial_Epithelial_0dpa
asap3#chr17:27235043-27236068	chr17:27235043-27236068	TSS	0	asap3	MA0600.2	chr17:27235566-27235581	-0.0230574	0.00454982	0.109745	rfx2	0.076513	rfx2->asap3	2.64174	0.0812842	0	0	0.545874	0.523043	0	1.79265	Superficial_Epithelial_0dpa
asap3#chr17:27235043-27236068	chr17:27235043-27236068	TSS	0	asap3	MA0058.3	chr17:27235845-27235854	-0.91394	0.926518	1.1073	max	0.0781341	max->asap3	2.29253	0.0664892	0	0	0.485417	0.523043	0	1.79265	Superficial_Epithelial_0dpa
ascl1b#chr7:49695669-49696744	chr7:49695669-49696744	TSS	0	ascl1b	MA0772.1	chr7:49695917-49695930	-0.293228	0.999334	0.862567	irf7	0.0852944	irf7->ascl1b	3.58722	0.0830942	0	0	0.785997	0.260256	0	1.4919	Superficial_Epithelial_0dpa
aste1a#chr16:41570209-41570839	chr16:41570209-41570839	Body	0.085	aste1a	MA0517.1	chr16:41570578-41570592	-0.0358475	1.01574	0.421947	stat1a	0.0569912	stat1a->aste1a	1.20209	0.0501573	0	0	1.21024	1.16344	0	2.6633	Superficial_Epithelial_0dpa
aste1a#chr16:41570209-41570839	chr16:41570209-41570839	Body	0.085	aste1a	MA0517.1	chr16:41570578-41570592	-0.0358475	1.01574	0.421947	stat1b	0.151583	stat1b->aste1a	3.48998	0.0653919	0	0	0.572188	1.16344	0	2.6633	Superficial_Epithelial_0dpa
aste1a#chr16:41570209-41570839	chr16:41570209-41570839	Body	0.085	aste1a	MA0481.3	chr16:41570496-41570506	0.0695895	-0.180982	0.306997	foxp1a	0.0835482	foxp1a->aste1a	2.36123	0.0631304	0	0	0.460207	1.16344	0	2.6633	Superficial_Epithelial_0dpa
aste1a#chr16:41570209-41570839	chr16:41570209-41570839	TSS	0.085	aste1a	MA0517.1	chr16:41570578-41570592	-0.0358475	1.01574	0.421947	stat1a	0.0569912	stat1a->aste1a	1.20209	0.0501573	0	0	1.21024	1.16344	0	2.6633	Superficial_Epithelial_0dpa
aste1a#chr16:41570209-41570839	chr16:41570209-41570839	TSS	0.085	aste1a	MA0517.1	chr16:41570578-41570592	-0.0358475	1.01574	0.421947	stat1b	0.151583	stat1b->aste1a	3.48998	0.0653919	0	0	0.572188	1.16344	0	2.6633	Superficial_Epithelial_0dpa
aste1a#chr16:41570209-41570839	chr16:41570209-41570839	TSS	0.085	aste1a	MA0481.3	chr16:41570496-41570506	0.0695895	-0.180982	0.306997	foxp1a	0.0835482	foxp1a->aste1a	2.36123	0.0631304	0	0	0.460207	1.16344	0	2.6633	Superficial_Epithelial_0dpa
atad2b#chr20:44582240-44583882	chr20:44582240-44583882	TSS	0	atad2b	MA0144.2	chr20:44583589-44583599	0.0462111	0.136886	-0.0204709	stat3	0.0671814	stat3->atad2b	1.64892	0.0581623	0	0	0.981733	0.676446	0	1.39163	Superficial_Epithelial_0dpa
atf3#chr20:37794186-37795073	chr20:37794186-37795073	TSS	0	atf3	MA1129.1	chr20:37794600-37794609	-0.0959538	0.143244	2.42478	jun	0.0526979	jun->atf3	27.393	0.122741	0	0	2.12638	2.40251	0	2.61471	Superficial_Epithelial_0dpa
atf3#chr20:37794186-37795073	chr20:37794186-37795073	TSS	0	atf3	MA1129.1	chr20:37794600-37794609	-0.0959538	0.143244	2.42478	jun	0.0526979	jun->atf3	27.393	0.122741	0	0	2.12638	2.40251	0	2.61471	Superficial_Epithelial_0dpa
atf3#chr20:37794186-37795073	chr20:37794186-37795073	TSS	0	atf3	MA1131.1	chr20:37794599-37794609	-0.102785	-0.0673179	2.02626	fosl2	0.0630162	fosl2->atf3	22.2153	0.163872	0	0	1.62846	2.40251	0	2.61471	Superficial_Epithelial_0dpa
atf3#chr20:37794186-37795073	chr20:37794186-37795073	TSS	0	atf3	MA1131.1	chr20:37794600-37794610	0.489536	-0.687664	1.15242	fosl2	0.0630162	fosl2->atf3	22.2153	0.163872	0	0	1.62846	2.40251	0	2.61471	Superficial_Epithelial_0dpa
atf3#chr20:37794186-37795073	chr20:37794186-37795073	TSS	0	atf3	MA1133.1	chr20:37794599-37794610	0.434483	-0.595888	1.08259	jun	0.05518	jun->atf3	27.393	0.122741	0	0	2.12638	2.40251	0	2.61471	Superficial_Epithelial_0dpa
atf3#chr20:37794186-37795073	chr20:37794186-37795073	TSS	0	atf3	MA1133.1	chr20:37795058-37795069	-0.0552749	0.0835068	0.048885	jun	0.05518	jun->atf3	27.393	0.122741	0	0	2.12638	2.40251	0	2.61471	Superficial_Epithelial_0dpa
atf3#chr20:37794186-37795073	chr20:37794186-37795073	TSS	0	atf3	MA1136.1	chr20:37794600-37794609	-0.0959538	0.143244	2.42478	junba	0.0510403	junba->atf3	18.8932	0.132025	0	0	1.93563	2.40251	0	2.61471	Superficial_Epithelial_0dpa
atf3#chr20:37794186-37795073	chr20:37794186-37795073	TSS	0	atf3	MA1136.1	chr20:37794600-37794609	-0.0959538	0.143244	2.42478	junba	0.0510403	junba->atf3	18.8932	0.132025	0	0	1.93563	2.40251	0	2.61471	Superficial_Epithelial_0dpa
atf3#chr20:37794186-37795073	chr20:37794186-37795073	TSS	0	atf3	MA1139.1	chr20:37794599-37794610	0.434483	-0.595888	1.08259	fosl2	0.0569617	fosl2->atf3	22.2153	0.163872	0	0	1.62846	2.40251	0	2.61471	Superficial_Epithelial_0dpa
atf3#chr20:37794186-37795073	chr20:37794186-37795073	TSS	0	atf3	MA1139.1	chr20:37794599-37794610	0.434483	-0.595888	1.08259	fosl2	0.0569617	fosl2->atf3	22.2153	0.163872	0	0	1.62846	2.40251	0	2.61471	Superficial_Epithelial_0dpa
atf4b#chr3:24197424-24199756	chr3:24197424-24199756	TSS	0	atf4b	MA0478.1	chr3:24197553-24197563	-0.147285	1.02181	0.218671	fosl2	0.0934041	fosl2->atf4b	2.31471	0.0842953	0	0	1.62846	1.83564	0	1.56156	Superficial_Epithelial_0dpa
atf4b#chr3:24197424-24199756	chr3:24197424-24199756	TSS	0	atf4b	MA0478.1	chr3:24198787-24198797	-0.249477	1.08689	0.857854	fosl2	0.0934041	fosl2->atf4b	2.31471	0.0842953	0	0	1.62846	1.83564	0	1.56156	Superficial_Epithelial_0dpa
atf4b#chr3:24197424-24199756	chr3:24197424-24199756	TSS	0	atf4b	MA0478.1	chr3:24197555-24197565	0.0563496	0.815258	-0.032307	fosl2	0.0934041	fosl2->atf4b	2.31471	0.0842953	0	0	1.62846	1.83564	0	1.56156	Superficial_Epithelial_0dpa
atf4b#chr3:24197424-24199756	chr3:24197424-24199756	TSS	0	atf4b	MA1128.1	chr3:24197553-24197565	0.0581841	0.667847	-0.0505326	fosl1a	0.122265	fosl1a->atf4b	6.34992	0.10362	0	0	2.74651	1.83564	0	1.56156	Superficial_Epithelial_0dpa
atf4b#chr3:24197424-24199756	chr3:24197424-24199756	TSS	0	atf4b	MA1128.1	chr3:24198787-24198799	-0.212508	0.803158	0.719536	fosl1a	0.122265	fosl1a->atf4b	6.34992	0.10362	0	0	2.74651	1.83564	0	1.56156	Superficial_Epithelial_0dpa
atf4b#chr3:24197424-24199756	chr3:24197424-24199756	TSS	0	atf4b	MA1130.1	chr3:24197553-24197564	-0.128529	0.921813	0.180061	fosl2	0.0837069	fosl2->atf4b	2.31471	0.0842953	0	0	1.62846	1.83564	0	1.56156	Superficial_Epithelial_0dpa
atf4b#chr3:24197424-24199756	chr3:24197424-24199756	TSS	0	atf4b	MA1130.1	chr3:24198787-24198798	-0.228687	0.90008	0.774647	fosl2	0.0837069	fosl2->atf4b	2.31471	0.0842953	0	0	1.62846	1.83564	0	1.56156	Superficial_Epithelial_0dpa
atf4b#chr3:24197424-24199756	chr3:24197424-24199756	TSS	0	atf4b	MA1130.1	chr3:24197554-24197565	0.0516538	0.745498	-0.0647834	fosl2	0.0837069	fosl2->atf4b	2.31471	0.0842953	0	0	1.62846	1.83564	0	1.56156	Superficial_Epithelial_0dpa
atf4b#chr3:24197424-24199756	chr3:24197424-24199756	TSS	0	atf4b	MA1137.1	chr3:24197553-24197565	0.0581841	0.667847	-0.0505326	fosl1a	0.123797	fosl1a->atf4b	6.34992	0.10362	0	0	2.74651	1.83564	0	1.56156	Superficial_Epithelial_0dpa
atf4b#chr3:24197424-24199756	chr3:24197424-24199756	TSS	0	atf4b	MA1137.1	chr3:24197553-24197565	0.0581841	0.667847	-0.0505326	fosl1a	0.123797	fosl1a->atf4b	6.34992	0.10362	0	0	2.74651	1.83564	0	1.56156	Superficial_Epithelial_0dpa
atf4b#chr3:24197424-24199756	chr3:24197424-24199756	TSS	0	atf4b	MA1137.1	chr3:24198787-24198799	-0.212508	0.803158	0.719536	fosl1a	0.123797	fosl1a->atf4b	6.34992	0.10362	0	0	2.74651	1.83564	0	1.56156	Superficial_Epithelial_0dpa
atf4b#chr3:24197424-24199756	chr3:24197424-24199756	TSS	0	atf4b	MA1138.1	chr3:24197554-24197563	-0.175669	1.13444	0.208367	fosl2	0.084033	fosl2->atf4b	2.31471	0.0842953	0	0	1.62846	1.83564	0	1.56156	Superficial_Epithelial_0dpa
atf4b#chr3:24197424-24199756	chr3:24197424-24199756	TSS	0	atf4b	MA1138.1	chr3:24197555-24197564	-0.167889	1.12855	0.212356	fosl2	0.084033	fosl2->atf4b	2.31471	0.0842953	0	0	1.62846	1.83564	0	1.56156	Superficial_Epithelial_0dpa
atf4b#chr3:24197424-24199756	chr3:24197424-24199756	TSS	0	atf4b	MA1142.1	chr3:24197554-24197563	-0.175669	1.13444	0.208367	fosl1a	0.132058	fosl1a->atf4b	6.34992	0.10362	0	0	2.74651	1.83564	0	1.56156	Superficial_Epithelial_0dpa
atf4b#chr3:24197424-24199756	chr3:24197424-24199756	TSS	0	atf4b	MA1142.1	chr3:24197555-24197564	-0.167889	1.12855	0.212356	fosl1a	0.132058	fosl1a->atf4b	6.34992	0.10362	0	0	2.74651	1.83564	0	1.56156	Superficial_Epithelial_0dpa
atf4b#chr3:24197424-24199756	chr3:24197424-24199756	TSS	0	atf4b	MA1144.1	chr3:24197554-24197563	-0.175669	1.13444	0.208367	fosl2	0.0824373	fosl2->atf4b	2.31471	0.0842953	0	0	1.62846	1.83564	0	1.56156	Superficial_Epithelial_0dpa
atf4b#chr3:24197424-24199756	chr3:24197424-24199756	TSS	0	atf4b	MA1144.1	chr3:24197555-24197564	-0.167889	1.12855	0.212356	fosl2	0.0824373	fosl2->atf4b	2.31471	0.0842953	0	0	1.62846	1.83564	0	1.56156	Superficial_Epithelial_0dpa
atf4b#chr3:24197424-24199756	chr3:24197424-24199756	TSS	0	atf4b	MA0477.2	chr3:24197553-24197565	0.0581841	0.667847	-0.0505326	fosl1a	0.126437	fosl1a->atf4b	6.34992	0.10362	0	0	2.74651	1.83564	0	1.56156	Superficial_Epithelial_0dpa
atf4b#chr3:24197424-24199756	chr3:24197424-24199756	TSS	0	atf4b	MA0477.2	chr3:24197553-24197565	0.0581841	0.667847	-0.0505326	fosl1a	0.126437	fosl1a->atf4b	6.34992	0.10362	0	0	2.74651	1.83564	0	1.56156	Superficial_Epithelial_0dpa
atf4b#chr3:24197424-24199756	chr3:24197424-24199756	TSS	0	atf4b	MA0477.2	chr3:24198787-24198799	-0.212508	0.803158	0.719536	fosl1a	0.126437	fosl1a->atf4b	6.34992	0.10362	0	0	2.74651	1.83564	0	1.56156	Superficial_Epithelial_0dpa
atf4b#chr3:24197424-24199756	chr3:24197424-24199756	TSS	0	atf4b	MA0089.2	chr3:24198786-24198801	0.113011	0.492914	0.191788	nfe2l1a	0.0627577	nfe2l1a->atf4b	3.89073	0.077821	0	0	1.05576	1.83564	0	1.56156	Superficial_Epithelial_0dpa
atf7ip#chr1:45614254-45616594	chr1:45614254-45616594	TSS	0	atf7ip	MA1101.2	chr1:45615008-45615026	-0.32151	0.447149	0.635627	bach2b	0.0657534	bach2b->atf7ip	1.08037	0.0599768	0	0	0.209666	0.126438	0	1.67307	Superficial_Epithelial_0dpa
atg9a#chr6:11248997-11251271	chr6:11248997-11251271	TSS	0	atg9a	MA0517.1	chr6:11250030-11250044	-0.110365	1.58634	0.154465	stat1a	0.0569912	stat1a->atg9a	2.06772	0.0610176	0	0	1.21024	0.340804	0	1.968	Superficial_Epithelial_0dpa
atg9a#chr6:11248997-11251271	chr6:11248997-11251271	TSS	0	atg9a	MA0772.1	chr6:11250035-11250048	-0.284951	1.67457	0.346597	irf7	0.0852944	irf7->atg9a	1.40407	0.0676039	0	0	0.785997	0.340804	0	1.968	Superficial_Epithelial_0dpa
atl3#chr14:30773987-30776509	chr14:30773987-30776509	TSS	0	atl3	MA0591.1	chr14:30775911-30775925	-0.417183	1.2154	1.29856	bach1b	0.0525138	bach1b->atl3	1.8427	0.0650147	0	0	0.925602	1.44529	0	2.0156	Superficial_Epithelial_0dpa
atl3#chr14:30773987-30776509	chr14:30773987-30776509	TSS	0	atl3	MA1120.1	chr14:30776005-30776015	-0.0154582	0.433187	-0.0489934	sox13	0.0537339	sox13->atl3	4.26788	0.0722296	0	0	0.248264	1.44529	0	2.0156	Superficial_Epithelial_0dpa
atl3#chr14:30773987-30776509	chr14:30773987-30776509	TSS	0	atl3	MA1633.2	chr14:30774440-30774448	-0.182742	0.711767	0.857264	bach1b	0.0601907	bach1b->atl3	1.8427	0.0650147	0	0	0.925602	1.44529	0	2.0156	Superficial_Epithelial_0dpa
atp13a3#chr11:34123736-34124706	chr11:34123736-34124706	TSS	0	atp13a3	MA1470.1	chr11:34124295-34124314	-0.0747544	0.113005	0.0851577	bach2b	0.193379	bach2b->atp13a3	13.1007	0.118099	0	0	0.209666	1.01372	0	0.304574	Superficial_Epithelial_0dpa
atp13a3#chr11:34123736-34124706	chr11:34123736-34124706	TSS	0	atp13a3	MA1470.1	chr11:34124295-34124314	-0.0747544	0.113005	0.0851577	bach2b	0.193379	bach2b->atp13a3	13.1007	0.118099	0	0	0.209666	1.01372	0	0.304574	Superficial_Epithelial_0dpa
atp1a1b#chr9:35922326-35924091	chr9:35922326-35924091	Inter	0.053	atp1a1b	MA1101.2	chr9:35923722-35923740	-0.12854	0.165846	0.187885	bach2b	0.0657534	bach2b->atp1a1b	2.21828	0.0687995	0	0	0.209666	0.413668	0	0.901052	Superficial_Epithelial_0dpa
atp1a1b#chr9:35922326-35924091	chr9:35922326-35924091	Inter	0.053	atp1a1b	MA1101.2	chr9:35923722-35923740	-0.12854	0.165846	0.187885	bach2b	0.0657534	bach2b->atp1a1b	2.21828	0.0687995	0	0	0.209666	0.413668	0	0.901052	Superficial_Epithelial_0dpa
atp1a1b#chr9:35902218-35903335	chr9:35902218-35903335	TSS	0	atp1a1b	MA1527.1	chr9:35903061-35903077	-0.0666693	0.296882	0.133717	nfic	0.072754	nfic->atp1a1b	4.50778	0.0790181	0	0	0.510769	0.413668	0	2.43124	Superficial_Epithelial_0dpa
atp1a1b#chr9:35902218-35903335	chr9:35902218-35903335	TSS	0	atp1a1b	MA1527.1	chr9:35903061-35903077	-0.0666693	0.296882	0.133717	nfic	0.072754	nfic->atp1a1b	4.50778	0.0790181	0	0	0.510769	0.413668	0	2.43124	Superficial_Epithelial_0dpa
atp1b1a#chr6:29216685-29218029	chr6:29216685-29218029	TSS	0	atp1b1a	MA0772.1	chr6:29217802-29217815	-0.0378085	0.348971	0.0825766	irf7	0.0852944	irf7->atp1b1a	2.49319	0.0579089	0	0	0.785997	1.45262	0	1.84512	Superficial_Epithelial_0dpa
atp2a1#chr3:26111439-26112906	chr3:26111439-26112906	Body	0.059	atp2a1	MA0625.2	chr3:26111889-26111897	-0.00559957	-0.0397044	0.291804	nfatc3a	0.0517831	nfatc3a->atp2a1	5.66287	0.0470174	0	0	0.273096	0.307878	0	4.07623	Superficial_Epithelial_0dpa
atp2a3#chr5:31167260-31169476	chr5:31167260-31169476	Body	0.086	atp2a3	MA1127.1	chr5:31168589-31168599	-0.0485805	0.0774461	0.0382168	fosb	0.150449	fosb->atp2a3	1.22771	0.0677448	0	0	2.01852	0.263049	0	1.76007	Superficial_Epithelial_0dpa
atp2a3#chr5:31167260-31169476	chr5:31167260-31169476	Body	0.086	atp2a3	MA1136.1	chr5:31168590-31168599	-0.0524146	0.0813003	0.0332545	fosb	0.133295	fosb->atp2a3	1.22771	0.0677448	0	0	2.01852	0.263049	0	1.76007	Superficial_Epithelial_0dpa
atp2a3#chr5:31240096-31241981	chr5:31240096-31241981	Body	0.068	atp2a3	MA1127.1	chr5:31241790-31241800	-0.348255	0.901999	1.68279	fosb	0.150449	fosb->atp2a3	1.22771	0.0677448	0	0	2.01852	0.263049	0	1.32454	Superficial_Epithelial_0dpa
atp2a3#chr5:31240096-31241981	chr5:31240096-31241981	Body	0.068	atp2a3	MA1136.1	chr5:31241791-31241800	-0.639568	1.07687	2.09475	fosb	0.133295	fosb->atp2a3	1.22771	0.0677448	0	0	2.01852	0.263049	0	1.32454	Superficial_Epithelial_0dpa
atp2a3#chr5:31240096-31241981	chr5:31240096-31241981	Body	0.068	atp2a3	MA1136.1	chr5:31241791-31241800	-0.639568	1.07687	2.09475	fosb	0.133295	fosb->atp2a3	1.22771	0.0677448	0	0	2.01852	0.263049	0	1.32454	Superficial_Epithelial_0dpa
atp2a3#chr5:31167260-31169476	chr5:31167260-31169476	TSS	0.086	atp2a3	MA1127.1	chr5:31168589-31168599	-0.0485805	0.0774461	0.0382168	fosb	0.150449	fosb->atp2a3	1.22771	0.0677448	0	0	2.01852	0.263049	0	1.76007	Superficial_Epithelial_0dpa
atp2a3#chr5:31167260-31169476	chr5:31167260-31169476	TSS	0.086	atp2a3	MA1136.1	chr5:31168590-31168599	-0.0524146	0.0813003	0.0332545	fosb	0.133295	fosb->atp2a3	1.22771	0.0677448	0	0	2.01852	0.263049	0	1.76007	Superficial_Epithelial_0dpa
atp2b1a#chr4:16122848-16125210	chr4:16122848-16125210	Body	0.078	atp2b1a	MA0840.1	chr4:16124773-16124784	0.785912	1.63702	-0.0679497	creb5b	0.128114	creb5b->atp2b1a	1.86019	0.048516	0	0	0.361049	0.0263789	0	1.34753	Superficial_Epithelial_0dpa
atp2b1a#chr4:16122848-16125210	chr4:16122848-16125210	Body	0.078	atp2b1a	MA0840.1	chr4:16124773-16124784	0.785912	1.63702	-0.0679497	creb5b	0.128114	creb5b->atp2b1a	1.86019	0.048516	0	0	0.361049	0.0263789	0	1.34753	Superficial_Epithelial_0dpa
atp2b1a#chr4:16122848-16125210	chr4:16122848-16125210	TSS	0.078	atp2b1a	MA0840.1	chr4:16124773-16124784	0.785912	1.63702	-0.0679497	creb5b	0.128114	creb5b->atp2b1a	1.86019	0.048516	0	0	0.361049	0.0263789	0	1.34753	Superficial_Epithelial_0dpa
atp2b1a#chr4:16122848-16125210	chr4:16122848-16125210	TSS	0.078	atp2b1a	MA0840.1	chr4:16124773-16124784	0.785912	1.63702	-0.0679497	creb5b	0.128114	creb5b->atp2b1a	1.86019	0.048516	0	0	0.361049	0.0263789	0	1.34753	Superficial_Epithelial_0dpa
atp2b4#chr11:23110448-23111121	chr11:23110448-23111121	Inter	0.05	atp2b4	MA0480.2	chr11:23110835-23110845	-0.0572645	0.0860203	0.0467529	foxo1a	0.0795932	foxo1a->atp2b4	7.49237	0.0927448	0	0	2.13262	1.42949	0	0.199654	Superficial_Epithelial_0dpa
atp2b4#chr11:23079388-23081217	chr11:23079388-23081217	TSS	0	atp2b4	MA0525.2	chr11:23080238-23080255	-0.111053	0.283993	0.0131007	tp63	0.180472	tp63->atp2b4	5.89088	0.0894347	0	0	0.439364	1.42949	0	1.84552	Superficial_Epithelial_0dpa
atp2b4#chr11:23079388-23081217	chr11:23079388-23081217	TSS	0	atp2b4	MA0525.2	chr11:23080238-23080255	-0.111053	0.283993	0.0131007	tp63	0.180472	tp63->atp2b4	5.89088	0.0894347	0	0	0.439364	1.42949	0	1.84552	Superficial_Epithelial_0dpa
atp2b4#chr11:23079388-23081217	chr11:23079388-23081217	TSS	0	atp2b4	MA1131.1	chr11:23079886-23079896	0.865469	1.21292	-0.389223	fosl2	0.0630162	fosl2->atp2b4	2.14489	0.0613326	0	0	1.62846	1.42949	0	1.84552	Superficial_Epithelial_0dpa
atp2b4#chr11:23079388-23081217	chr11:23079388-23081217	TSS	0	atp2b4	MA1139.1	chr11:23079886-23079897	0.853009	1.10249	-0.483408	fosl2	0.0569617	fosl2->atp2b4	2.14489	0.0613326	0	0	1.62846	1.42949	0	1.84552	Superficial_Epithelial_0dpa
atp2b4#chr11:23079388-23081217	chr11:23079388-23081217	TSS	0	atp2b4	MA1139.1	chr11:23079886-23079897	0.853009	1.10249	-0.483408	fosl2	0.0569617	fosl2->atp2b4	2.14489	0.0613326	0	0	1.62846	1.42949	0	1.84552	Superficial_Epithelial_0dpa
atp5f1d#chr22:18778215-18779369	chr22:18778215-18779369	TSS	0	atp5f1d	MA1099.2	chr22:18778790-18778799	-0.991004	1.70021	1.1989	her6	0.0672081	her6->atp5f1d	2.14672	0.0579118	0	0	0.024186	0.25871	0	1.17873	Superficial_Epithelial_0dpa
atp6ap2#chr22:11136156-11137144	chr22:11136156-11137144	TSS	0	atp6ap2	MA0615.1	chr22:11136905-11136921	-0.0316105	0.0140934	0.0927267	gmeb1	0.0621872	gmeb1->atp6ap2	1.17331	0.0390853	0	0	0.242239	0.340975	0	1.48532	Superficial_Epithelial_0dpa
atp6v0e1#chr14:52570766-52572500	chr14:52570766-52572500	TSS	0	atp6v0e1	MA0073.1	chr14:52571885-52571904	-0.0689927	0.07106	0.0996638	rreb1a	0.0500665	rreb1a->atp6v0e1	1.37323	0.0403627	0	0	0.266798	1.05221	0	1.06719	Superficial_Epithelial_0dpa
atp6v0e1#chr14:52570766-52572500	chr14:52570766-52572500	TSS	0	atp6v0e1	MA0073.1	chr14:52571887-52571906	-0.0872076	0.0941084	0.124215	rreb1a	0.0500665	rreb1a->atp6v0e1	1.37323	0.0403627	0	0	0.266798	1.05221	0	1.06719	Superficial_Epithelial_0dpa
atp6v0e1#chr14:52570766-52572500	chr14:52570766-52572500	TSS	0	atp6v0e1	MA0073.1	chr14:52571889-52571908	-0.170557	0.204186	0.20829	rreb1a	0.0500665	rreb1a->atp6v0e1	1.37323	0.0403627	0	0	0.266798	1.05221	0	1.06719	Superficial_Epithelial_0dpa
atp6v0e1#chr14:52570766-52572500	chr14:52570766-52572500	TSS	0	atp6v0e1	MA0073.1	chr14:52571891-52571910	-0.17915	0.210682	0.239637	rreb1a	0.0500665	rreb1a->atp6v0e1	1.37323	0.0403627	0	0	0.266798	1.05221	0	1.06719	Superficial_Epithelial_0dpa
atp6v0e1#chr14:52570766-52572500	chr14:52570766-52572500	TSS	0	atp6v0e1	MA0073.1	chr14:52571893-52571912	-0.179305	0.206064	0.238424	rreb1a	0.0500665	rreb1a->atp6v0e1	1.37323	0.0403627	0	0	0.266798	1.05221	0	1.06719	Superficial_Epithelial_0dpa
atp6v0e1#chr14:52570766-52572500	chr14:52570766-52572500	TSS	0	atp6v0e1	MA0073.1	chr14:52571895-52571914	-0.177989	0.17098	0.247175	rreb1a	0.0500665	rreb1a->atp6v0e1	1.37323	0.0403627	0	0	0.266798	1.05221	0	1.06719	Superficial_Epithelial_0dpa
atp6v0e1#chr14:52570766-52572500	chr14:52570766-52572500	TSS	0	atp6v0e1	MA0073.1	chr14:52571897-52571916	-0.184041	0.176547	0.255993	rreb1a	0.0500665	rreb1a->atp6v0e1	1.37323	0.0403627	0	0	0.266798	1.05221	0	1.06719	Superficial_Epithelial_0dpa
atp6v0e1#chr14:52570766-52572500	chr14:52570766-52572500	TSS	0	atp6v0e1	MA0073.1	chr14:52571899-52571918	-0.177368	0.169643	0.248235	rreb1a	0.0500665	rreb1a->atp6v0e1	1.37323	0.0403627	0	0	0.266798	1.05221	0	1.06719	Superficial_Epithelial_0dpa
atp6v0e1#chr14:52570766-52572500	chr14:52570766-52572500	TSS	0	atp6v0e1	MA0073.1	chr14:52571901-52571920	-0.134943	0.125436	0.198028	rreb1a	0.0500665	rreb1a->atp6v0e1	1.37323	0.0403627	0	0	0.266798	1.05221	0	1.06719	Superficial_Epithelial_0dpa
atp6v0e1#chr14:52570766-52572500	chr14:52570766-52572500	TSS	0	atp6v0e1	MA0073.1	chr14:52571921-52571940	-0.0671517	0.0211608	0.141707	rreb1a	0.0500665	rreb1a->atp6v0e1	1.37323	0.0403627	0	0	0.266798	1.05221	0	1.06719	Superficial_Epithelial_0dpa
atp6v0e1#chr14:52570766-52572500	chr14:52570766-52572500	TSS	0	atp6v0e1	MA0073.1	chr14:52572203-52572222	-0.047033	0.0215141	0.0997605	rreb1a	0.0500665	rreb1a->atp6v0e1	1.37323	0.0403627	0	0	0.266798	1.05221	0	1.06719	Superficial_Epithelial_0dpa
atp6v0e1#chr14:52570766-52572500	chr14:52570766-52572500	TSS	0	atp6v0e1	MA0073.1	chr14:52572205-52572224	-0.0572899	0.0313149	0.134186	rreb1a	0.0500665	rreb1a->atp6v0e1	1.37323	0.0403627	0	0	0.266798	1.05221	0	1.06719	Superficial_Epithelial_0dpa
atp6v0e1#chr14:52570766-52572500	chr14:52570766-52572500	TSS	0	atp6v0e1	MA0073.1	chr14:52572207-52572226	-0.0487675	0.0204102	0.150096	rreb1a	0.0500665	rreb1a->atp6v0e1	1.37323	0.0403627	0	0	0.266798	1.05221	0	1.06719	Superficial_Epithelial_0dpa
atp6v0e1#chr14:52570766-52572500	chr14:52570766-52572500	TSS	0	atp6v0e1	MA0073.1	chr14:52572209-52572228	-0.127713	0.127954	0.218362	rreb1a	0.0500665	rreb1a->atp6v0e1	1.37323	0.0403627	0	0	0.266798	1.05221	0	1.06719	Superficial_Epithelial_0dpa
atp8b1#chr21:3699790-3700450	chr21:3699790-3700450	TSS	0	atp8b1	MA0004.1	chr21:3700406-3700411	-0.778311	0.390868	0.160131	arnt	0.0611097	arnt->atp8b1	2.99056	0.0580667	0	0	0.282055	1.25813	0	2.57227	Superficial_Epithelial_0dpa
atp8b1#chr21:3699790-3700450	chr21:3699790-3700450	TSS	0	atp8b1	MA0004.1	chr21:3700406-3700411	-0.778311	0.390868	0.160131	arnt	0.0611097	arnt->atp8b1	2.99056	0.0580667	0	0	0.282055	1.25813	0	2.57227	Superficial_Epithelial_0dpa
atp8b1#chr21:3699790-3700450	chr21:3699790-3700450	TSS	0	atp8b1	MA0006.1	chr21:3700328-3700333	-1.52237	1.22493	1.40856	arnt	0.0564374	arnt->atp8b1	2.99056	0.0580667	0	0	0.282055	1.25813	0	2.57227	Superficial_Epithelial_0dpa
atrx#chr14:10656524-10658358	chr14:10656524-10658358	TSS	0	atrx	MA1127.1	chr14:10657798-10657808	0.113493	1.11037	-0.109824	fosb	0.150449	fosb->atrx	3.99658	0.0692356	0	0	2.01852	0.558921	0	1.35598	Superficial_Epithelial_0dpa
atrx#chr14:10656524-10658358	chr14:10656524-10658358	TSS	0	atrx	MA1129.1	chr14:10657798-10657807	0.0975099	1.22958	-0.154167	jun	0.0526979	jun->atrx	1.97828	0.0691051	0	0	2.12638	0.558921	0	1.35598	Superficial_Epithelial_0dpa
atrx#chr14:10656524-10658358	chr14:10656524-10658358	TSS	0	atrx	MA1129.1	chr14:10657798-10657807	0.0975099	1.22958	-0.154167	jun	0.0526979	jun->atrx	1.97828	0.0691051	0	0	2.12638	0.558921	0	1.35598	Superficial_Epithelial_0dpa
atrx#chr14:10656524-10658358	chr14:10656524-10658358	TSS	0	atrx	MA1136.1	chr14:10657798-10657807	0.0975099	1.22958	-0.154167	fosb	0.133295	fosb->atrx	3.99658	0.0692356	0	0	2.01852	0.558921	0	1.35598	Superficial_Epithelial_0dpa
atrx#chr14:10656524-10658358	chr14:10656524-10658358	TSS	0	atrx	MA1136.1	chr14:10657798-10657807	0.0975099	1.22958	-0.154167	fosb	0.133295	fosb->atrx	3.99658	0.0692356	0	0	2.01852	0.558921	0	1.35598	Superficial_Epithelial_0dpa
atrx#chr14:10656524-10658358	chr14:10656524-10658358	TSS	0	atrx	MA1470.1	chr14:10657939-10657958	-0.0715722	-0.0565407	0.224055	bach2b	0.193379	bach2b->atrx	1.50679	0.0642191	0	0	0.209666	0.558921	0	1.35598	Superficial_Epithelial_0dpa
atxn2#chr5:41707067-41709693	chr5:41707067-41709693	TSS	0	atxn2	MA1648.1	chr5:41708760-41708770	-0.307425	0.22191	0.310556	tcf12	0.0500565	tcf12->atxn2	1.15497	0.0391948	0	0	0.112757	0.200065	0	1.13609	Superficial_Epithelial_0dpa
avl9#chr12:14209764-14212117	chr12:14209764-14212117	TSS	0	avl9	MA0695.1	chr12:14210335-14210346	-0.223043	1.71346	0.153768	zbtb7c	0.077786	zbtb7c->avl9	3.6121	0.0700265	0	0	0.123195	0.673571	0	1.48168	Superficial_Epithelial_0dpa
b2m#chr4:12792936-12793474	chr4:12792936-12793474	TSS	0	b2m	MA0517.1	chr4:12793213-12793227	-0.126508	0.0888375	0.54486	stat1b	0.151583	stat1b->b2m	3.54132	0.07367	0	0	0.572188	3.98317	0	1.47448	Superficial_Epithelial_0dpa
b2m#chr4:12792936-12793474	chr4:12792936-12793474	TSS	0	b2m	MA0137.3	chr4:12793047-12793057	-0.190139	0.867776	-0.131581	stat1b	0.0662396	stat1b->b2m	3.54132	0.07367	0	0	0.572188	3.98317	0	1.47448	Superficial_Epithelial_0dpa
b2m#chr4:12792936-12793474	chr4:12792936-12793474	TSS	0	b2m	MA0772.1	chr4:12793212-12793225	-0.123828	0.085179	0.392159	irf7	0.0852944	irf7->b2m	4.3733	0.086856	0	0	0.785997	3.98317	0	1.47448	Superficial_Epithelial_0dpa
b2m#chr4:12792936-12793474	chr4:12792936-12793474	TSS	0	b2m	MA1127.1	chr4:12793062-12793072	-0.618881	0.692569	0.95709	fosb	0.150449	fosb->b2m	3.41764	0.0496303	0	0	2.01852	3.98317	0	1.47448	Superficial_Epithelial_0dpa
b2m#chr4:12792936-12793474	chr4:12792936-12793474	TSS	0	b2m	MA1133.1	chr4:12793061-12793072	-0.636859	1.01053	0.923144	jun	0.05518	jun->b2m	23.1703	0.192965	0	0	2.12638	3.98317	0	1.47448	Superficial_Epithelial_0dpa
b2m#chr4:12793996-12794670	chr4:12793996-12794670	TSS	0	b2m	MA1127.1	chr4:12794011-12794021	-0.0116106	0.272161	-0.0971809	fosb	0.150449	fosb->b2m	3.41764	0.0496303	0	0	2.01852	3.98317	0	1.92483	Superficial_Epithelial_0dpa
b2m#chr4:12793996-12794670	chr4:12793996-12794670	TSS	0	b2m	MA1133.1	chr4:12794011-12794022	-0.0106431	0.24711	-0.0899337	jun	0.05518	jun->b2m	23.1703	0.192965	0	0	2.12638	3.98317	0	1.92483	Superficial_Epithelial_0dpa
b2ml#chr8:50941927-50943065	chr8:50941927-50943065	TSS	0	b2ml	MA0517.1	chr8:50942768-50942782	0.0409752	0.197011	0.275402	stat1a	0.0569912	stat1a->b2ml	1.18488	0.0650098	0	0	1.21024	3.9198	0	1.9031	Superficial_Epithelial_0dpa
b2ml#chr8:50947286-50947669	chr8:50947286-50947669	TSS	0	b2ml	MA1130.1	chr8:50947463-50947474	-0.0372725	0.0308958	0.0995915	fosl2	0.0837069	fosl2->b2ml	1.08388	0.0348796	0	0	1.62846	3.9198	0	1.08265	Superficial_Epithelial_0dpa
b2ml#chr8:50947286-50947669	chr8:50947286-50947669	TSS	0	b2ml	MA1142.1	chr8:50947465-50947474	-0.044727	0.0426288	0.112612	fosl1a	0.132058	fosl1a->b2ml	3.51672	0.0806122	0	0	2.74651	3.9198	0	1.08265	Superficial_Epithelial_0dpa
b3gnt5a#chr11:10540882-10541779	chr11:10540882-10541779	TSS	0	b3gnt5a	MA1128.1	chr11:10541369-10541381	-0.112345	0.289554	0.0297403	fosl1a	0.122265	fosl1a->b3gnt5a	14.8851	0.108331	0	0	2.74651	1.37694	0	2.51576	Superficial_Epithelial_0dpa
b3gnt5a#chr11:10540882-10541779	chr11:10540882-10541779	TSS	0	b3gnt5a	MA1137.1	chr11:10541369-10541381	-0.112345	0.289554	0.0297403	fosl1a	0.123797	fosl1a->b3gnt5a	14.8851	0.108331	0	0	2.74651	1.37694	0	2.51576	Superficial_Epithelial_0dpa
b3gnt5a#chr11:10540882-10541779	chr11:10540882-10541779	TSS	0	b3gnt5a	MA1142.1	chr11:10541371-10541380	-0.129323	0.353438	0.0384832	fosl1a	0.132058	fosl1a->b3gnt5a	14.8851	0.108331	0	0	2.74651	1.37694	0	2.51576	Superficial_Epithelial_0dpa
b3gnt5a#chr11:10540882-10541779	chr11:10540882-10541779	TSS	0	b3gnt5a	MA0477.2	chr11:10541369-10541381	-0.112345	0.289554	0.0297403	fosl1a	0.126437	fosl1a->b3gnt5a	14.8851	0.108331	0	0	2.74651	1.37694	0	2.51576	Superficial_Epithelial_0dpa
b3gnt5a#chr11:10540882-10541779	chr11:10540882-10541779	TSS	0	b3gnt5a	MA0477.2	chr11:10541369-10541381	-0.112345	0.289554	0.0297403	fosl1a	0.126437	fosl1a->b3gnt5a	14.8851	0.108331	0	0	2.74651	1.37694	0	2.51576	Superficial_Epithelial_0dpa
b4galt4#chr5:67761439-67762883	chr5:67761439-67762883	TSS	0	b4galt4	MA1633.2	chr5:67762101-67762109	0.0530827	-0.1101	0.385265	bach1b	0.0601907	bach1b->b4galt4	1.53944	0.0590718	0	0	0.925602	0.571021	0	1.64755	Superficial_Epithelial_0dpa
b4galt6#chr20:6195985-6197754	chr20:6195985-6197754	TSS	0	b4galt6	MA0742.2	chr20:6197248-6197256	-0.381517	0.401229	1.00148	klf12b	0.0830955	klf12b->b4galt6	2.30436	0.0904152	0	0	0.00592045	0.18715	0	1.4546	Superficial_Epithelial_0dpa
bach1b#chr10:25368411-25371112	chr10:25368411-25371112	TSS	0	bach1b	MA0640.2	chr10:25369123-25369136	-0.0559658	0.138103	0.0595327	elf3	0.0502292	elf3->bach1b	4.89727	0.0644903	0	0	1.46398	0.925602	0	2.27698	Superficial_Epithelial_0dpa
bada#chr21:27188240-27189931	chr21:27188240-27189931	TSS	0	bada	MA1128.1	chr21:27188411-27188423	0.344658	-0.119616	0.446865	fosl1a	0.122265	fosl1a->bada	6.8247	0.0854805	0	0	2.74651	0.449025	0	2.07559	Superficial_Epithelial_0dpa
bada#chr21:27188240-27189931	chr21:27188240-27189931	TSS	0	bada	MA1130.1	chr21:27188411-27188422	0.37338	-0.0752441	0.205499	fosl2	0.0837069	fosl2->bada	4.32534	0.0753765	0	0	1.62846	0.449025	0	2.07559	Superficial_Epithelial_0dpa
bada#chr21:27188240-27189931	chr21:27188240-27189931	TSS	0	bada	MA1130.1	chr21:27188412-27188423	0.371563	-0.0411863	0.463082	fosl2	0.0837069	fosl2->bada	4.32534	0.0753765	0	0	1.62846	0.449025	0	2.07559	Superficial_Epithelial_0dpa
bada#chr21:27188240-27189931	chr21:27188240-27189931	TSS	0	bada	MA1137.1	chr21:27188411-27188423	0.344658	-0.119616	0.446865	fosl1a	0.123797	fosl1a->bada	6.8247	0.0854805	0	0	2.74651	0.449025	0	2.07559	Superficial_Epithelial_0dpa
bada#chr21:27188240-27189931	chr21:27188240-27189931	TSS	0	bada	MA0477.2	chr21:27188411-27188423	0.344658	-0.119616	0.446865	fosl1a	0.126437	fosl1a->bada	6.8247	0.0854805	0	0	2.74651	0.449025	0	2.07559	Superficial_Epithelial_0dpa
bada#chr21:27188240-27189931	chr21:27188240-27189931	TSS	0	bada	MA0477.2	chr21:27188411-27188423	0.344658	-0.119616	0.446865	fosl1a	0.126437	fosl1a->bada	6.8247	0.0854805	0	0	2.74651	0.449025	0	2.07559	Superficial_Epithelial_0dpa
bag6#chr15:34667567-34668874	chr15:34667567-34668874	TSS	0	bag6	MA0481.3	chr15:34668299-34668309	-0.122718	0.13914	0.095633	foxp1a	0.0835482	foxp1a->bag6	2.36075	0.0374771	0	0	0.460207	0.304988	0	2.99857	Superficial_Epithelial_0dpa
bahcc1b#chr12:34712538-34712845	chr12:34712538-34712845	TSS	0	bahcc1b	MA0073.1	chr12:34712710-34712729	-0.0289459	0.142028	-0.0176444	rreb1a	0.0500665	rreb1a->bahcc1b	2.10066	0.0306159	0	0	0.266798	0.663379	0	2.13984	Superficial_Epithelial_0dpa
bahcc1b#chr12:34712538-34712845	chr12:34712538-34712845	TSS	0	bahcc1b	MA0073.1	chr12:34712714-34712733	-0.0214373	0.128086	-0.0124976	rreb1a	0.0500665	rreb1a->bahcc1b	2.10066	0.0306159	0	0	0.266798	0.663379	0	2.13984	Superficial_Epithelial_0dpa
bahcc1b#chr12:34712538-34712845	chr12:34712538-34712845	TSS	0	bahcc1b	MA0073.1	chr12:34712762-34712781	-0.0902718	0.0660945	0.115613	rreb1a	0.0500665	rreb1a->bahcc1b	2.10066	0.0306159	0	0	0.266798	0.663379	0	2.13984	Superficial_Epithelial_0dpa
bahcc1b#chr12:34712538-34712845	chr12:34712538-34712845	TSS	0	bahcc1b	MA0073.1	chr12:34712763-34712782	-0.100584	0.0781235	0.127244	rreb1a	0.0500665	rreb1a->bahcc1b	2.10066	0.0306159	0	0	0.266798	0.663379	0	2.13984	Superficial_Epithelial_0dpa
bahcc1b#chr12:34712538-34712845	chr12:34712538-34712845	TSS	0	bahcc1b	MA0073.1	chr12:34712766-34712785	-0.102973	0.0814332	0.129904	rreb1a	0.0500665	rreb1a->bahcc1b	2.10066	0.0306159	0	0	0.266798	0.663379	0	2.13984	Superficial_Epithelial_0dpa
bahcc1b#chr12:34712538-34712845	chr12:34712538-34712845	TSS	0	bahcc1b	MA0073.1	chr12:34712768-34712787	-0.101368	0.0795313	0.14341	rreb1a	0.0500665	rreb1a->bahcc1b	2.10066	0.0306159	0	0	0.266798	0.663379	0	2.13984	Superficial_Epithelial_0dpa
bahcc1b#chr12:34712538-34712845	chr12:34712538-34712845	TSS	0	bahcc1b	MA0073.1	chr12:34712770-34712789	-0.0997581	0.0767718	0.15545	rreb1a	0.0500665	rreb1a->bahcc1b	2.10066	0.0306159	0	0	0.266798	0.663379	0	2.13984	Superficial_Epithelial_0dpa
bahcc1b#chr12:34715945-34717220	chr12:34715945-34717220	TSS	0	bahcc1b	MA0073.1	chr12:34716885-34716904	-0.686458	1.20888	0.620627	rreb1a	0.0500665	rreb1a->bahcc1b	2.10066	0.0306159	0	0	0.266798	0.663379	0	1.95969	Superficial_Epithelial_0dpa
baiap2a#chr3:51701500-51702662	chr3:51701500-51702662	Body	0.085	baiap2a	MA0525.2	chr3:51701944-51701961	-0.0578021	0.932413	0.102549	tp63	0.180472	tp63->baiap2a	8.75628	0.1023	0	0	0.439364	2.96301	0	2.3013	Superficial_Epithelial_0dpa
baiap2a#chr3:51701500-51702662	chr3:51701500-51702662	Body	0.085	baiap2a	MA0525.2	chr3:51701944-51701961	-0.0578021	0.932413	0.102549	tp63	0.180472	tp63->baiap2a	8.75628	0.1023	0	0	0.439364	2.96301	0	2.3013	Superficial_Epithelial_0dpa
baiap2a#chr3:51701500-51702662	chr3:51701500-51702662	Body	0.085	baiap2a	MA0525.2	chr3:51702376-51702393	-0.0478694	0.059444	0.0603786	tp63	0.180472	tp63->baiap2a	8.75628	0.1023	0	0	0.439364	2.96301	0	2.3013	Superficial_Epithelial_0dpa
baiap2a#chr3:51684487-51685467	chr3:51684487-51685467	TSS	0	baiap2a	MA0851.1	chr3:51685391-51685407	-0.0387606	0.0477206	0.127145	foxj3	0.0770929	foxj3->baiap2a	1.17499	0.0486823	0	0	0.643544	2.96301	0	2.24916	Superficial_Epithelial_0dpa
baiap2a#chr3:51684487-51685467	chr3:51684487-51685467	TSS	0	baiap2a	MA1137.1	chr3:51684652-51684664	-0.0421735	0.10199	0.0191083	fosl1a	0.123797	fosl1a->baiap2a	1.30152	0.0344618	0	0	2.74651	2.96301	0	2.24916	Superficial_Epithelial_0dpa
baiap2a#chr3:51684487-51685467	chr3:51684487-51685467	TSS	0	baiap2a	MA1138.1	chr3:51684654-51684663	-0.0405819	0.108167	0.0126688	fosl2	0.084033	fosl2->baiap2a	9.25672	0.0872588	0	0	1.62846	2.96301	0	2.24916	Superficial_Epithelial_0dpa
baiap2a#chr3:51684487-51685467	chr3:51684487-51685467	TSS	0	baiap2a	MA1144.1	chr3:51684654-51684663	-0.0405819	0.108167	0.0126688	fosl2	0.0824373	fosl2->baiap2a	9.25672	0.0872588	0	0	1.62846	2.96301	0	2.24916	Superficial_Epithelial_0dpa
baiap2l1b#chr3:61473670-61474374	chr3:61473670-61474374	Body	0.055	baiap2l1b	MA1470.1	chr3:61474242-61474261	-0.0348178	0.0346747	0.102178	bach2b	0.193379	bach2b->baiap2l1b	2.34489	0.0871826	0	0	0.209666	0.241806	0	1.3762	Superficial_Epithelial_0dpa
baiap2l1b#chr3:61494327-61495331	chr3:61494327-61495331	TSS	0	baiap2l1b	MA0006.1	chr3:61494867-61494872	-0.767903	-0.676842	3.75515	arnt	0.0564374	arnt->baiap2l1b	1.12561	0.0452183	0	0	0.282055	0.241806	0	1.80622	Superficial_Epithelial_0dpa
baiap2l1b#chr3:61494327-61495331	chr3:61494327-61495331	TSS	0	baiap2l1b	MA0006.1	chr3:61494911-61494916	0.440184	-1.06702	2.73861	arnt	0.0564374	arnt->baiap2l1b	1.12561	0.0452183	0	0	0.282055	0.241806	0	1.80622	Superficial_Epithelial_0dpa
baiap2l1b#chr3:61494327-61495331	chr3:61494327-61495331	TSS	0	baiap2l1b	MA0522.3	chr3:61494499-61494509	-0.250683	0.398424	0.230973	tcf3a	0.0820155	tcf3a->baiap2l1b	1.81242	0.040046	0	0	0.450357	0.241806	0	1.80622	Superficial_Epithelial_0dpa
baiap2l1b#chr3:61494327-61495331	chr3:61494327-61495331	TSS	0	baiap2l1b	MA0734.3	chr3:61494506-61494518	-0.133562	0.241482	0.0836895	gli2a	0.101933	gli2a->baiap2l1b	1.52927	0.0692135	0	0	0.0506187	0.241806	0	1.80622	Superficial_Epithelial_0dpa
baiap2l2a#chr3:24457979-24459127	chr3:24457979-24459127	TSS	0	baiap2l2a	MA0650.3	chr3:24458278-24458289	-0.0808917	0.0355332	0.0696318	hoxa13b	0.053556	hoxa13b->baiap2l2a	1.37373	0.0798076	0	0	0.114247	0.00230866	0	0.632614	Superficial_Epithelial_0dpa
baz2ba#chr6:11829563-11831155	chr6:11829563-11831155	Body	0.064	baz2ba	MA0840.1	chr6:11829724-11829735	-0.259158	0.434889	0.546015	creb5b	0.128114	creb5b->baz2ba	2.13696	0.0683451	0	0	0.361049	1.45061	0	1.73579	Superficial_Epithelial_0dpa
baz2ba#chr6:11829563-11831155	chr6:11829563-11831155	Body	0.064	baz2ba	MA1131.1	chr6:11829725-11829735	-0.336836	0.536735	0.626862	fosl2	0.0630162	fosl2->baz2ba	3.11823	0.0522117	0	0	1.62846	1.45061	0	1.73579	Superficial_Epithelial_0dpa
baz2ba#chr6:11829563-11831155	chr6:11829563-11831155	Body	0.064	baz2ba	MA1139.1	chr6:11829724-11829735	-0.259158	0.434889	0.546015	fosl2	0.0569617	fosl2->baz2ba	3.11823	0.0522117	0	0	1.62846	1.45061	0	1.73579	Superficial_Epithelial_0dpa
baz2ba#chr6:11829563-11831155	chr6:11829563-11831155	Body	0.064	baz2ba	MA1139.1	chr6:11829724-11829735	-0.259158	0.434889	0.546015	fosl2	0.0569617	fosl2->baz2ba	3.11823	0.0522117	0	0	1.62846	1.45061	0	1.73579	Superficial_Epithelial_0dpa
baz2ba#chr6:11848480-11851161	chr6:11848480-11851161	Body	0.079	baz2ba	MA0522.3	chr6:11849487-11849497	-0.041852	0.0342236	0.0794036	tcf3a	0.0820155	tcf3a->baz2ba	6.64949	0.0884306	0	0	0.450357	1.45061	0	0.739736	Superficial_Epithelial_0dpa
baz2ba#chr6:11848480-11851161	chr6:11848480-11851161	Body	0.079	baz2ba	MA0480.2	chr6:11850183-11850193	0.00405436	0.125879	-0.00266457	foxo1a	0.0795932	foxo1a->baz2ba	1.9311	0.0540434	0	0	2.13262	1.45061	0	0.739736	Superficial_Epithelial_0dpa
baz2ba#chr6:11829563-11831155	chr6:11829563-11831155	TSS	0.064	baz2ba	MA0840.1	chr6:11829724-11829735	-0.259158	0.434889	0.546015	creb5b	0.128114	creb5b->baz2ba	2.13696	0.0683451	0	0	0.361049	1.45061	0	1.73579	Superficial_Epithelial_0dpa
baz2ba#chr6:11829563-11831155	chr6:11829563-11831155	TSS	0.064	baz2ba	MA1131.1	chr6:11829725-11829735	-0.336836	0.536735	0.626862	fosl2	0.0630162	fosl2->baz2ba	3.11823	0.0522117	0	0	1.62846	1.45061	0	1.73579	Superficial_Epithelial_0dpa
baz2ba#chr6:11829563-11831155	chr6:11829563-11831155	TSS	0.064	baz2ba	MA1139.1	chr6:11829724-11829735	-0.259158	0.434889	0.546015	fosl2	0.0569617	fosl2->baz2ba	3.11823	0.0522117	0	0	1.62846	1.45061	0	1.73579	Superficial_Epithelial_0dpa
baz2ba#chr6:11829563-11831155	chr6:11829563-11831155	TSS	0.064	baz2ba	MA1139.1	chr6:11829724-11829735	-0.259158	0.434889	0.546015	fosl2	0.0569617	fosl2->baz2ba	3.11823	0.0522117	0	0	1.62846	1.45061	0	1.73579	Superficial_Epithelial_0dpa
baz2ba#chr6:11848480-11851161	chr6:11848480-11851161	TSS	0.079	baz2ba	MA0522.3	chr6:11849487-11849497	-0.041852	0.0342236	0.0794036	tcf3a	0.0820155	tcf3a->baz2ba	6.64949	0.0884306	0	0	0.450357	1.45061	0	0.739736	Superficial_Epithelial_0dpa
baz2ba#chr6:11848480-11851161	chr6:11848480-11851161	TSS	0.079	baz2ba	MA0480.2	chr6:11850183-11850193	0.00405436	0.125879	-0.00266457	foxo1a	0.0795932	foxo1a->baz2ba	1.9311	0.0540434	0	0	2.13262	1.45061	0	0.739736	Superficial_Epithelial_0dpa
bbox1#chr7:34298223-34299478	chr7:34298223-34299478	TSS	0	bbox1	MA0840.1	chr7:34298462-34298473	0.0205637	0.0453937	0.606953	creb5b	0.128114	creb5b->bbox1	8.81944	0.116399	0	0	0.361049	1.3788	0	1.94077	Superficial_Epithelial_0dpa
bbox1#chr7:34298223-34299478	chr7:34298223-34299478	TSS	0	bbox1	MA0840.1	chr7:34298462-34298473	0.0205637	0.0453937	0.606953	creb5b	0.128114	creb5b->bbox1	8.81944	0.116399	0	0	0.361049	1.3788	0	1.94077	Superficial_Epithelial_0dpa
bbox1#chr7:34298223-34299478	chr7:34298223-34299478	TSS	0	bbox1	MA1129.1	chr7:34298463-34298472	-0.0767732	0.163241	0.796119	jun	0.0526979	jun->bbox1	4.0987	0.0804003	0	0	2.12638	1.3788	0	1.94077	Superficial_Epithelial_0dpa
bbox1#chr7:34298223-34299478	chr7:34298223-34299478	TSS	0	bbox1	MA1129.1	chr7:34298463-34298472	-0.0767732	0.163241	0.796119	jun	0.0526979	jun->bbox1	4.0987	0.0804003	0	0	2.12638	1.3788	0	1.94077	Superficial_Epithelial_0dpa
bbox1#chr7:34298223-34299478	chr7:34298223-34299478	TSS	0	bbox1	MA1131.1	chr7:34298462-34298472	-0.0697938	0.103317	0.74134	fosl2	0.0630162	fosl2->bbox1	1.07931	0.0386853	0	0	1.62846	1.3788	0	1.94077	Superficial_Epithelial_0dpa
bbox1#chr7:34298223-34299478	chr7:34298223-34299478	TSS	0	bbox1	MA1131.1	chr7:34298463-34298473	0.0224331	0.0110899	0.618371	fosl2	0.0630162	fosl2->bbox1	1.07931	0.0386853	0	0	1.62846	1.3788	0	1.94077	Superficial_Epithelial_0dpa
bbox1#chr7:34298223-34299478	chr7:34298223-34299478	TSS	0	bbox1	MA1133.1	chr7:34298462-34298473	0.0205637	0.0453937	0.606953	jun	0.05518	jun->bbox1	4.0987	0.0804003	0	0	2.12638	1.3788	0	1.94077	Superficial_Epithelial_0dpa
bbox1#chr7:34298223-34299478	chr7:34298223-34299478	TSS	0	bbox1	MA1133.1	chr7:34298462-34298473	0.0205637	0.0453937	0.606953	junbb	0.090798	junbb->bbox1	2.04293	0.0800016	0	0	1.09612	1.3788	0	1.94077	Superficial_Epithelial_0dpa
bbox1#chr7:34298223-34299478	chr7:34298223-34299478	TSS	0	bbox1	MA1133.1	chr7:34298462-34298473	0.0205637	0.0453937	0.606953	jun	0.05518	jun->bbox1	4.0987	0.0804003	0	0	2.12638	1.3788	0	1.94077	Superficial_Epithelial_0dpa
bbox1#chr7:34298223-34299478	chr7:34298223-34299478	TSS	0	bbox1	MA1133.1	chr7:34298462-34298473	0.0205637	0.0453937	0.606953	junbb	0.090798	junbb->bbox1	2.04293	0.0800016	0	0	1.09612	1.3788	0	1.94077	Superficial_Epithelial_0dpa
bbox1#chr7:34298223-34299478	chr7:34298223-34299478	TSS	0	bbox1	MA1136.1	chr7:34298463-34298472	-0.0767732	0.163241	0.796119	junbb	0.0827228	junbb->bbox1	2.04293	0.0800016	0	0	1.09612	1.3788	0	1.94077	Superficial_Epithelial_0dpa
bbox1#chr7:34298223-34299478	chr7:34298223-34299478	TSS	0	bbox1	MA1136.1	chr7:34298463-34298472	-0.0767732	0.163241	0.796119	junbb	0.0827228	junbb->bbox1	2.04293	0.0800016	0	0	1.09612	1.3788	0	1.94077	Superficial_Epithelial_0dpa
bbox1#chr7:34298223-34299478	chr7:34298223-34299478	TSS	0	bbox1	MA1139.1	chr7:34298462-34298473	0.0205637	0.0453937	0.606953	fosl2	0.0569617	fosl2->bbox1	1.07931	0.0386853	0	0	1.62846	1.3788	0	1.94077	Superficial_Epithelial_0dpa
bbox1#chr7:34298223-34299478	chr7:34298223-34299478	TSS	0	bbox1	MA1139.1	chr7:34298462-34298473	0.0205637	0.0453937	0.606953	junbb	0.0817679	junbb->bbox1	2.04293	0.0800016	0	0	1.09612	1.3788	0	1.94077	Superficial_Epithelial_0dpa
bbox1#chr7:34298223-34299478	chr7:34298223-34299478	TSS	0	bbox1	MA1139.1	chr7:34298462-34298473	0.0205637	0.0453937	0.606953	fosl2	0.0569617	fosl2->bbox1	1.07931	0.0386853	0	0	1.62846	1.3788	0	1.94077	Superficial_Epithelial_0dpa
bbox1#chr7:34298223-34299478	chr7:34298223-34299478	TSS	0	bbox1	MA1139.1	chr7:34298462-34298473	0.0205637	0.0453937	0.606953	junbb	0.0817679	junbb->bbox1	2.04293	0.0800016	0	0	1.09612	1.3788	0	1.94077	Superficial_Epithelial_0dpa
bbox1#chr7:34298223-34299478	chr7:34298223-34299478	TSS	0	bbox1	MA1140.2	chr7:34298462-34298473	0.0205637	0.0453937	0.606953	junbb	0.0902616	junbb->bbox1	2.04293	0.0800016	0	0	1.09612	1.3788	0	1.94077	Superficial_Epithelial_0dpa
bbox1#chr7:34298223-34299478	chr7:34298223-34299478	TSS	0	bbox1	MA1140.2	chr7:34298462-34298473	0.0205637	0.0453937	0.606953	junbb	0.0902616	junbb->bbox1	2.04293	0.0800016	0	0	1.09612	1.3788	0	1.94077	Superficial_Epithelial_0dpa
bbox1#chr7:34298223-34299478	chr7:34298223-34299478	TSS	0	bbox1	MA0609.2	chr7:34298460-34298475	-0.346245	0.633269	0.983363	crema	0.0998319	crema->bbox1	6.49727	0.095324	0	0	1.34056	1.3788	0	1.94077	Superficial_Epithelial_0dpa
bbox1#chr7:34298223-34299478	chr7:34298223-34299478	TSS	0	bbox1	MA0609.2	chr7:34298460-34298475	-0.346245	0.633269	0.983363	crema	0.0998319	crema->bbox1	6.49727	0.095324	0	0	1.34056	1.3788	0	1.94077	Superficial_Epithelial_0dpa
bckdhb#chr16:5104767-5105827	chr16:5104767-5105827	TSS	0	bckdhb	MA1127.1	chr16:5105309-5105319	0.323994	1.28884	-0.172833	fosb	0.150449	fosb->bckdhb	1.73934	0.0697422	0	0	2.01852	0.10268	0	1.90732	Superficial_Epithelial_0dpa
bckdhb#chr16:5104767-5105827	chr16:5104767-5105827	TSS	0	bckdhb	MA1127.1	chr16:5105310-5105320	0.199269	1.44503	-0.127386	fosb	0.150449	fosb->bckdhb	1.73934	0.0697422	0	0	2.01852	0.10268	0	1.90732	Superficial_Epithelial_0dpa
bcl11ba#chr17:18116834-18118147	chr17:18116834-18118147	TSS	0	bcl11ba	MA0073.1	chr17:18117122-18117141	-0.0821511	0.151016	0.152043	rreb1a	0.0500665	rreb1a->bcl11ba	1.77834	0.0831717	0	0	0.266798	0.206366	0	1.62574	Superficial_Epithelial_0dpa
bcl11ba#chr17:18116834-18118147	chr17:18116834-18118147	TSS	0	bcl11ba	MA0073.1	chr17:18117126-18117145	-0.28573	0.379353	0.588551	rreb1a	0.0500665	rreb1a->bcl11ba	1.77834	0.0831717	0	0	0.266798	0.206366	0	1.62574	Superficial_Epithelial_0dpa
bcl11ba#chr17:18116834-18118147	chr17:18116834-18118147	TSS	0	bcl11ba	MA0073.1	chr17:18117128-18117147	-0.416085	0.524568	0.753335	rreb1a	0.0500665	rreb1a->bcl11ba	1.77834	0.0831717	0	0	0.266798	0.206366	0	1.62574	Superficial_Epithelial_0dpa
bcl2l1#chr23:18980592-18982929	chr23:18980592-18982929	TSS	0	bcl2l1	MA0059.1	chr23:18980791-18980801	-0.238896	0.29894	0.66597	max	0.0600174	max->bcl2l1	1.09135	0.0531086	0	0	0.485417	0.56356	0	1.8569	Superficial_Epithelial_0dpa
bcl2l1#chr23:18980592-18982929	chr23:18980592-18982929	TSS	0	bcl2l1	MA0478.1	chr23:18980915-18980925	-0.0668076	0.0805481	0.102082	fosl2	0.0934041	fosl2->bcl2l1	1.82503	0.0431707	0	0	1.62846	0.56356	0	1.8569	Superficial_Epithelial_0dpa
bcl2l1#chr23:18980592-18982929	chr23:18980592-18982929	TSS	0	bcl2l1	MA0478.1	chr23:18980917-18980927	-0.0988753	0.11967	0.136324	fosl2	0.0934041	fosl2->bcl2l1	1.82503	0.0431707	0	0	1.62846	0.56356	0	1.8569	Superficial_Epithelial_0dpa
bcl2l1#chr23:18980592-18982929	chr23:18980592-18982929	TSS	0	bcl2l1	MA0058.3	chr23:18980792-18980801	-0.260696	0.308668	0.720169	max	0.0781341	max->bcl2l1	1.09135	0.0531086	0	0	0.485417	0.56356	0	1.8569	Superficial_Epithelial_0dpa
bcl2l1#chr23:18980592-18982929	chr23:18980592-18982929	TSS	0	bcl2l1	MA0058.3	chr23:18980792-18980801	-0.260696	0.308668	0.720169	max	0.0781341	max->bcl2l1	1.09135	0.0531086	0	0	0.485417	0.56356	0	1.8569	Superficial_Epithelial_0dpa
bcl2l1#chr23:18980592-18982929	chr23:18980592-18982929	TSS	0	bcl2l1	MA1130.1	chr23:18980916-18980927	-0.0906357	0.109698	0.135973	fosl2	0.0837069	fosl2->bcl2l1	1.82503	0.0431707	0	0	1.62846	0.56356	0	1.8569	Superficial_Epithelial_0dpa
bcl2l1#chr23:18980592-18982929	chr23:18980592-18982929	TSS	0	bcl2l1	MA1131.1	chr23:18981655-18981665	-0.734243	1.83919	2.7612	fosl2	0.0630162	fosl2->bcl2l1	1.82503	0.0431707	0	0	1.62846	0.56356	0	1.8569	Superficial_Epithelial_0dpa
bcl2l1#chr23:18980592-18982929	chr23:18980592-18982929	TSS	0	bcl2l1	MA1138.1	chr23:18980916-18980925	-0.0967685	0.119755	0.135571	fosl2	0.084033	fosl2->bcl2l1	1.82503	0.0431707	0	0	1.62846	0.56356	0	1.8569	Superficial_Epithelial_0dpa
bcl2l1#chr23:18980592-18982929	chr23:18980592-18982929	TSS	0	bcl2l1	MA1139.1	chr23:18981654-18981665	-0.631022	1.718	2.53901	fosl2	0.0569617	fosl2->bcl2l1	1.82503	0.0431707	0	0	1.62846	0.56356	0	1.8569	Superficial_Epithelial_0dpa
bcl2l1#chr23:18980592-18982929	chr23:18980592-18982929	TSS	0	bcl2l1	MA1139.1	chr23:18981654-18981665	-0.631022	1.718	2.53901	fosl2	0.0569617	fosl2->bcl2l1	1.82503	0.0431707	0	0	1.62846	0.56356	0	1.8569	Superficial_Epithelial_0dpa
bcl2l1#chr23:18980592-18982929	chr23:18980592-18982929	TSS	0	bcl2l1	MA1144.1	chr23:18980916-18980925	-0.0967685	0.119755	0.135571	fosl2	0.0824373	fosl2->bcl2l1	1.82503	0.0431707	0	0	1.62846	0.56356	0	1.8569	Superficial_Epithelial_0dpa
BCR#chr8:30526694-30527277	chr8:30526694-30527277	Body	0.106	BCR	MA1527.1	chr8:30526860-30526876	-0.042442	0.0310507	0.0770354	nfic	0.072754	nfic->BCR	1.57191	0.115893	0	0	0.510769	0.0344093	0	0.172837	Superficial_Epithelial_0dpa
BCR#chr8:30526694-30527277	chr8:30526694-30527277	Body	0.106	BCR	MA1527.1	chr8:30526860-30526876	-0.042442	0.0310507	0.0770354	nfic	0.072754	nfic->BCR	1.57191	0.115893	0	0	0.510769	0.0344093	0	0.172837	Superficial_Epithelial_0dpa
bdh1#chr24:3328135-3329029	chr24:3328135-3329029	TSS	0	bdh1	MA0073.1	chr24:3328711-3328730	-0.539565	1.54813	0.561816	rreb1a	0.0500665	rreb1a->bdh1	1.13403	0.0446985	0	0	0.266798	0.0382895	0	2.97534	Superficial_Epithelial_0dpa
bdh1#chr24:3328135-3329029	chr24:3328135-3329029	TSS	0	bdh1	MA0073.1	chr24:3328714-3328733	-0.427062	1.35844	0.475713	rreb1a	0.0500665	rreb1a->bdh1	1.13403	0.0446985	0	0	0.266798	0.0382895	0	2.97534	Superficial_Epithelial_0dpa
bicdl2#chr5:57658587-57660133	chr5:57658587-57660133	TSS	0	bicdl2	MA0656.1	chr5:57658805-57658816	0.26518	-0.0712142	0.684065	jdp2b	0.138912	jdp2b->bicdl2	2.53048	0.0805046	0	0	1.27829	1.04152	0	2.17023	Superficial_Epithelial_0dpa
bicdl2#chr5:57658587-57660133	chr5:57658587-57660133	TSS	0	bicdl2	MA0656.1	chr5:57658805-57658816	0.26518	-0.0712142	0.684065	jdp2b	0.138912	jdp2b->bicdl2	2.53048	0.0805046	0	0	1.27829	1.04152	0	2.17023	Superficial_Epithelial_0dpa
bik#chr4:18842840-18844421	chr4:18842840-18844421	TSS	0	bik	MA0625.2	chr4:18843304-18843312	0.0336921	0.718754	-0.126125	nfatc3a	0.0517831	nfatc3a->bik	2.36592	0.0533485	0	0	0.273096	0.895701	0	2.46121	Superficial_Epithelial_0dpa
bik#chr4:18842840-18844421	chr4:18842840-18844421	TSS	0	bik	MA0625.2	chr4:18843266-18843274	0.0787658	-0.111845	0.683605	nfatc3a	0.0517831	nfatc3a->bik	2.36592	0.0533485	0	0	0.273096	0.895701	0	2.46121	Superficial_Epithelial_0dpa
bin2b#chr6:38857938-38858575	chr6:38857938-38858575	Inter	0.077	bin2b	MA0840.1	chr6:38858224-38858235	-0.00134257	0.319836	0.0587289	creb5b	0.128114	creb5b->bin2b	2.56021	0.0829064	0	0	0.361049	0.597163	0	1.04274	Superficial_Epithelial_0dpa
bin2b#chr6:38857938-38858575	chr6:38857938-38858575	Inter	0.077	bin2b	MA0840.1	chr6:38858224-38858235	-0.00134257	0.319836	0.0587289	creb5b	0.128114	creb5b->bin2b	2.56021	0.0829064	0	0	0.361049	0.597163	0	1.04274	Superficial_Epithelial_0dpa
bin2b#chr6:38857938-38858575	chr6:38857938-38858575	Inter	0.077	bin2b	MA0525.2	chr6:38858281-38858298	-0.0816071	0.106703	0.128429	tp63	0.180472	tp63->bin2b	8.775	0.119156	0	0	0.439364	0.597163	0	1.04274	Superficial_Epithelial_0dpa
bin2b#chr6:38857938-38858575	chr6:38857938-38858575	Inter	0.077	bin2b	MA1131.1	chr6:38858225-38858235	0.00353786	0.322055	0.0173527	fosl2	0.0630162	fosl2->bin2b	2.39749	0.0613407	0	0	1.62846	0.597163	0	1.04274	Superficial_Epithelial_0dpa
bin2b#chr6:38857938-38858575	chr6:38857938-38858575	Inter	0.077	bin2b	MA1139.1	chr6:38858224-38858235	-0.00134257	0.319836	0.0587289	fosl2	0.0569617	fosl2->bin2b	2.39749	0.0613407	0	0	1.62846	0.597163	0	1.04274	Superficial_Epithelial_0dpa
bin2b#chr6:38857938-38858575	chr6:38857938-38858575	Inter	0.077	bin2b	MA1139.1	chr6:38858224-38858235	-0.00134257	0.319836	0.0587289	fosl2	0.0569617	fosl2->bin2b	2.39749	0.0613407	0	0	1.62846	0.597163	0	1.04274	Superficial_Epithelial_0dpa
bin3#chr8:50742187-50743840	chr8:50742187-50743840	TSS	0	bin3	MA0851.1	chr8:50743565-50743581	-0.126986	0.31084	0.0942417	foxj3	0.0770929	foxj3->bin3	1.87416	0.0530876	0	0	0.643544	1.31278	0	2.0001	Superficial_Epithelial_0dpa
bloc1s6#chr18:5509212-5510898	chr18:5509212-5510898	TSS	0	bloc1s6	MA0147.3	chr18:5509690-5509701	-0.00516505	1.11154	1.16698	myca	0.0687634	myca->bloc1s6	2.6585	0.0727161	0	0	0.0350607	0.0795143	0	1.4648	Superficial_Epithelial_0dpa
bmp15#chr7:51774438-51775922	chr7:51774438-51775922	TSS	0	bmp15	MA0107.1	chr7:51775417-51775426	0.468838	0.673231	-0.192003	rela	0.0646949	rela->bmp15	1.26826	0.0602726	0	0	0.122663	0.000597453	0	1.32319	Superficial_Epithelial_0dpa
bmp15#chr7:51774438-51775922	chr7:51774438-51775922	TSS	0	bmp15	MA0107.1	chr7:51775418-51775427	0.381581	0.792194	-0.134282	rela	0.0646949	rela->bmp15	1.26826	0.0602726	0	0	0.122663	0.000597453	0	1.32319	Superficial_Epithelial_0dpa
bmp15#chr7:51774438-51775922	chr7:51774438-51775922	TSS	0	bmp15	MA0695.1	chr7:51774636-51774647	-0.277936	0.332668	0.169775	zbtb7c	0.077786	zbtb7c->bmp15	1.43574	0.0590278	0	0	0.123195	0.000597453	0	1.32319	Superficial_Epithelial_0dpa
bpnt1#chr20:9154155-9155568	chr20:9154155-9155568	Inter	0.055	bpnt1	MA0478.1	chr20:9155233-9155243	0.0324529	0.00244558	0.118423	fosl2	0.0934041	fosl2->bpnt1	1.52411	0.0468497	0	0	1.62846	0.903754	0	4.4166	Superficial_Epithelial_0dpa
bpnt1#chr20:9154155-9155568	chr20:9154155-9155568	Inter	0.055	bpnt1	MA0478.1	chr20:9155235-9155245	0.0238964	-0.0118199	0.155749	fosl2	0.0934041	fosl2->bpnt1	1.52411	0.0468497	0	0	1.62846	0.903754	0	4.4166	Superficial_Epithelial_0dpa
bpnt1#chr20:9154155-9155568	chr20:9154155-9155568	Inter	0.055	bpnt1	MA0511.2	chr20:9155078-9155086	-0.0952317	0.0879708	0.283749	runx2b	0.0696328	runx2b->bpnt1	2.51783	0.0574908	0	0	0.579878	0.903754	0	4.4166	Superficial_Epithelial_0dpa
bpnt1#chr20:9154155-9155568	chr20:9154155-9155568	Inter	0.055	bpnt1	MA1130.1	chr20:9155234-9155245	-0.0171816	0.030419	0.191602	fosl2	0.0837069	fosl2->bpnt1	1.52411	0.0468497	0	0	1.62846	0.903754	0	4.4166	Superficial_Epithelial_0dpa
bpnt1#chr20:9154155-9155568	chr20:9154155-9155568	Inter	0.055	bpnt1	MA1138.1	chr20:9155235-9155244	0.0277425	-0.0236543	0.169255	fosl2	0.084033	fosl2->bpnt1	1.52411	0.0468497	0	0	1.62846	0.903754	0	4.4166	Superficial_Epithelial_0dpa
bpnt1#chr20:9154155-9155568	chr20:9154155-9155568	Inter	0.055	bpnt1	MA1144.1	chr20:9155235-9155244	0.0277425	-0.0236543	0.169255	fosl2	0.0824373	fosl2->bpnt1	1.52411	0.0468497	0	0	1.62846	0.903754	0	4.4166	Superficial_Epithelial_0dpa
bptf#chr3:25419529-25421430	chr3:25419529-25421430	TSS	0	bptf	MA1126.1	chr3:25419657-25419672	-0.945014	0.968388	1.85701	fosab	0.10646	fosab->bptf	1.2024	0.0582907	0	0	2.65236	0.205811	0	1.29172	Superficial_Epithelial_0dpa
bptf#chr3:25419529-25421430	chr3:25419529-25421430	TSS	0	bptf	MA1126.1	chr3:25419653-25419668	-0.861508	1.05268	1.54377	fosab	0.10646	fosab->bptf	1.2024	0.0582907	0	0	2.65236	0.205811	0	1.29172	Superficial_Epithelial_0dpa
bptf#chr3:25419529-25421430	chr3:25419529-25421430	TSS	0	bptf	MA1951.1	chr3:25419656-25419669	-0.791834	0.802208	1.45118	fosab	0.154414	fosab->bptf	1.2024	0.0582907	0	0	2.65236	0.205811	0	1.29172	Superficial_Epithelial_0dpa
bptf#chr3:25419529-25421430	chr3:25419529-25421430	TSS	0	bptf	MA1951.1	chr3:25419656-25419669	-0.791834	0.802208	1.45118	fosab	0.154414	fosab->bptf	1.2024	0.0582907	0	0	2.65236	0.205811	0	1.29172	Superficial_Epithelial_0dpa
brd2a#chr19:7153708-7155574	chr19:7153708-7155574	TSS	0	brd2a	MA0591.1	chr19:7153750-7153764	0.0684923	-0.0552625	0.606177	bach1b	0.0525138	bach1b->brd2a	6.115	0.136356	0	0	0.925602	2.10727	0	1.77032	Superficial_Epithelial_0dpa
brd2a#chr19:7153708-7155574	chr19:7153708-7155574	TSS	0	brd2a	MA0089.2	chr19:7153749-7153764	0.0882271	-0.0995058	0.551127	nfe2l1a	0.0627577	nfe2l1a->brd2a	14.8191	0.149191	0	0	1.05576	2.10727	0	1.77032	Superficial_Epithelial_0dpa
brd4#chr3:53155340-53156773	chr3:53155340-53156773	TSS	0.055	brd4	MA1101.2	chr3:53155422-53155440	0.00217836	0.0890359	0.14619	bach2b	0.0657534	bach2b->brd4	7.22072	0.095562	0	0	0.209666	1.55125	0	1.59906	Superficial_Epithelial_0dpa
brd4#chr3:53155340-53156773	chr3:53155340-53156773	TSS	0.055	brd4	MA1101.2	chr3:53155422-53155440	0.00217836	0.0890359	0.14619	bach2b	0.0657534	bach2b->brd4	7.22072	0.095562	0	0	0.209666	1.55125	0	1.59906	Superficial_Epithelial_0dpa
brd4#chr3:53155340-53156773	chr3:53155340-53156773	TSS	0.055	brd4	MA1470.1	chr3:53155359-53155378	-0.038201	0.0798271	0.14472	bach2b	0.193379	bach2b->brd4	7.22072	0.095562	0	0	0.209666	1.55125	0	1.59906	Superficial_Epithelial_0dpa
brd4#chr3:53157628-53158905	chr3:53157628-53158905	TSS	0	brd4	MA0477.2	chr3:53157944-53157956	-0.100849	0.217511	0.0610708	fosl1a	0.126437	fosl1a->brd4	3.48051	0.0615827	0	0	2.74651	1.55125	0	2.12614	Superficial_Epithelial_0dpa
brf1a#chr13:33367783-33371317	chr13:33367783-33371317	Body	0.126	brf1a	MA0059.1	chr13:33368807-33368817	-0.0851664	0.144921	0.109168	max	0.0600174	max->brf1a	1.41323	0.0681118	0	0	0.485417	0.0903545	0	1.26666	Superficial_Epithelial_0dpa
brf1a#chr13:33342390-33343131	chr13:33342390-33343131	Inter	0.143	brf1a	MA0525.2	chr13:33342861-33342878	-0.0914241	0.1287	0.118275	tp63	0.180472	tp63->brf1a	13.5741	0.178186	0	0	0.439364	0.0903545	0	0.250734	Superficial_Epithelial_0dpa
brf1a#chr13:33342390-33343131	chr13:33342390-33343131	Inter	0.143	brf1a	MA0525.2	chr13:33342861-33342878	-0.0914241	0.1287	0.118275	tp63	0.180472	tp63->brf1a	13.5741	0.178186	0	0	0.439364	0.0903545	0	0.250734	Superficial_Epithelial_0dpa
brf1a#chr13:33367783-33371317	chr13:33367783-33371317	TSS	0.126	brf1a	MA0059.1	chr13:33368807-33368817	-0.0851664	0.144921	0.109168	max	0.0600174	max->brf1a	1.41323	0.0681118	0	0	0.485417	0.0903545	0	1.26666	Superficial_Epithelial_0dpa
bsg#chr22:18945607-18946873	chr22:18945607-18946873	Body	0.059	bsg	MA0525.2	chr22:18946409-18946426	-0.286254	0.309282	0.572018	tp63	0.180472	tp63->bsg	6.8114	0.0930417	0	0	0.439364	0.729321	0	0.863767	Superficial_Epithelial_0dpa
bsg#chr22:18945607-18946873	chr22:18945607-18946873	Body	0.059	bsg	MA0525.2	chr22:18946409-18946426	-0.286254	0.309282	0.572018	tp63	0.180472	tp63->bsg	6.8114	0.0930417	0	0	0.439364	0.729321	0	0.863767	Superficial_Epithelial_0dpa
btbd10b#chr7:66133113-66134144	chr7:66133113-66134144	TSS	0	btbd10b	MA1120.1	chr7:66133363-66133373	-0.016744	0.291103	-0.0406681	sox13	0.0537339	sox13->btbd10b	2.4569	0.0591624	0	0	0.248264	0.80062	0	1.5512	Superficial_Epithelial_0dpa
btbd11a#chr4:11990426-11991054	chr4:11990426-11991054	Body	0.115	btbd11a	MA0073.1	chr4:11990718-11990737	0.221241	0.277163	-0.00350478	rreb1a	0.0500665	rreb1a->btbd11a	7.6786	0.0512722	0	0	0.266798	0.18513	0	1.29828	Superficial_Epithelial_0dpa
btbd11a#chr4:12037214-12037810	chr4:12037214-12037810	Inter	0.114	btbd11a	MA0525.2	chr4:12037370-12037387	-0.0361408	0.0557375	0.0446197	tp63	0.180472	tp63->btbd11a	12.6171	0.192071	0	0	0.439364	0.18513	0	0.482294	Superficial_Epithelial_0dpa
btbd11a#chr4:12037214-12037810	chr4:12037214-12037810	Inter	0.114	btbd11a	MA0525.2	chr4:12037370-12037387	-0.0361408	0.0557375	0.0446197	tp63	0.180472	tp63->btbd11a	12.6171	0.192071	0	0	0.439364	0.18513	0	0.482294	Superficial_Epithelial_0dpa
btbd16#chr12:11649640-11651021	chr12:11649640-11651021	TSS	0	btbd16	MA0598.3	chr12:11650494-11650508	-0.0583789	0.0316398	0.183151	ehf	0.0681254	ehf->btbd16	1.90254	0.0424876	0	0	0.212191	0.00317406	0	1.59572	Superficial_Epithelial_0dpa
btf3#chr5:34991214-34993503	chr5:34991214-34993503	TSS	0	btf3	MA0522.3	chr5:34992522-34992532	-0.101219	0.0594742	0.116559	tcf3a	0.0820155	tcf3a->btf3	2.53686	0.0655481	0	0	0.450357	0.921383	0	0.882028	Superficial_Epithelial_0dpa
btr02#chr3:50136155-50136403	chr3:50136155-50136403	TSS	0	btr02	MA1131.1	chr3:50136201-50136211	-0.0502453	0.0809186	0.104865	fosl2	0.0630162	fosl2->btr02	1.39462	0.0584262	0	0	1.62846	1.38068	0	2.25042	Superficial_Epithelial_0dpa
btr02#chr3:50136155-50136403	chr3:50136155-50136403	TSS	0	btr02	MA1139.1	chr3:50136201-50136212	-0.0460582	0.0783271	0.111658	fosl2	0.0569617	fosl2->btr02	1.39462	0.0584262	0	0	1.62846	1.38068	0	2.25042	Superficial_Epithelial_0dpa
btr02#chr3:50136155-50136403	chr3:50136155-50136403	TSS	0	btr02	MA1139.1	chr3:50136201-50136212	-0.0460582	0.0783271	0.111658	fosl2	0.0569617	fosl2->btr02	1.39462	0.0584262	0	0	1.62846	1.38068	0	2.25042	Superficial_Epithelial_0dpa
btr02#chr3:50139210-50140289	chr3:50139210-50140289	TSS	0	btr02	MA0478.1	chr3:50139922-50139932	-1.97541	3.26613	2.29316	fosl2	0.0934041	fosl2->btr02	1.39462	0.0584262	0	0	1.62846	1.38068	0	2.57157	Superficial_Epithelial_0dpa
btr29#chr19:1413567-1414730	chr19:1413567-1414730	TSS	0	btr29	MA0517.1	chr19:1413895-1413909	-0.138006	0.513007	0.0708997	stat1b	0.151583	stat1b->btr29	2.2821	0.102576	0	0	0.572188	0.0202951	0	2.19278	Superficial_Epithelial_0dpa
btr29#chr19:1413567-1414730	chr19:1413567-1414730	TSS	0	btr29	MA0517.1	chr19:1414521-1414535	0.145314	-0.216166	0.433326	stat1b	0.151583	stat1b->btr29	2.2821	0.102576	0	0	0.572188	0.0202951	0	2.19278	Superficial_Epithelial_0dpa
btr29#chr19:1413567-1414730	chr19:1413567-1414730	TSS	0	btr29	MA0517.1	chr19:1414527-1414541	-0.0267771	-0.022552	0.619396	stat1b	0.151583	stat1b->btr29	2.2821	0.102576	0	0	0.572188	0.0202951	0	2.19278	Superficial_Epithelial_0dpa
btr29#chr19:1413567-1414730	chr19:1413567-1414730	TSS	0	btr29	MA0517.1	chr19:1414533-1414547	0.0187392	-0.0354293	0.513394	stat1b	0.151583	stat1b->btr29	2.2821	0.102576	0	0	0.572188	0.0202951	0	2.19278	Superficial_Epithelial_0dpa
btr29#chr19:1413567-1414730	chr19:1413567-1414730	TSS	0	btr29	MA0517.1	chr19:1414577-1414591	-0.107194	0.670866	-0.0471108	stat1b	0.151583	stat1b->btr29	2.2821	0.102576	0	0	0.572188	0.0202951	0	2.19278	Superficial_Epithelial_0dpa
BX465862.4#chr4:11629717-11631671	chr4:11629717-11631671	Inter	0.058	BX465862.4	MA0480.2	chr4:11630959-11630969	-0.0695637	0.10232	0.0623315	foxo1a	0.0795932	foxo1a->BX465862.4	3.73241	0.0538091	0	0	2.13262	0.933352	0	2.97292	Superficial_Epithelial_0dpa
BX769173.1#chr3:48992953-48994060	chr3:48992953-48994060	TSS	0	BX769173.1	MA0772.1	chr3:48993595-48993608	-0.129689	0.131279	0.271233	irf7	0.0852944	irf7->BX769173.1	2.55806	0.0370222	0	0	0.785997	0.0271162	0	2.56552	Superficial_Epithelial_0dpa
BX855614.1#chr4:73806332-73807533	chr4:73806332-73807533	TSS	0	BX855614.1	MA0073.1	chr4:73807342-73807361	-0.161318	0.378559	0.153087	rreb1a	0.0500665	rreb1a->BX855614.1	1.0868	0.0470688	0	0	0.266798	0.0139625	0	1.11223	Superficial_Epithelial_0dpa
BX908797.1#chr3:42967651-42968420	chr3:42967651-42968420	TSS	0	BX908797.1	MA1515.1	chr3:42968201-42968211	-0.398232	1.60216	-0.246213	klf2b	0.107486	klf2b->BX908797.1	2.39856	0.0680313	0	0	1.42664	1.65456	0	1.37736	Superficial_Epithelial_0dpa
bzw1b#chr9:425537-427005	chr9:425537-427005	Body	0.086	bzw1b	MA1128.1	chr9:426093-426105	-0.0794931	0.0864847	1.37182	fosl1a	0.122265	fosl1a->bzw1b	4.94243	0.0776482	0	0	2.74651	1.36812	0	1.39636	Superficial_Epithelial_0dpa
bzw1b#chr9:425537-427005	chr9:425537-427005	Body	0.086	bzw1b	MA1130.1	chr9:426093-426104	-0.0688983	0.077717	1.57183	fosl2	0.0837069	fosl2->bzw1b	2.39639	0.0629578	0	0	1.62846	1.36812	0	1.39636	Superficial_Epithelial_0dpa
bzw1b#chr9:425537-427005	chr9:425537-427005	Body	0.086	bzw1b	MA1137.1	chr9:426093-426105	-0.0794931	0.0864847	1.37182	fosl1a	0.123797	fosl1a->bzw1b	4.94243	0.0776482	0	0	2.74651	1.36812	0	1.39636	Superficial_Epithelial_0dpa
bzw1b#chr9:425537-427005	chr9:425537-427005	Body	0.086	bzw1b	MA1138.1	chr9:426095-426104	-0.0916086	-0.0694041	1.79937	fosl2	0.084033	fosl2->bzw1b	2.39639	0.0629578	0	0	1.62846	1.36812	0	1.39636	Superficial_Epithelial_0dpa
bzw1b#chr9:425537-427005	chr9:425537-427005	Body	0.086	bzw1b	MA1142.1	chr9:426095-426104	-0.0916086	-0.0694041	1.79937	fosl1a	0.132058	fosl1a->bzw1b	4.94243	0.0776482	0	0	2.74651	1.36812	0	1.39636	Superficial_Epithelial_0dpa
bzw1b#chr9:425537-427005	chr9:425537-427005	Body	0.086	bzw1b	MA1144.1	chr9:426095-426104	-0.0916086	-0.0694041	1.79937	fosl2	0.0824373	fosl2->bzw1b	2.39639	0.0629578	0	0	1.62846	1.36812	0	1.39636	Superficial_Epithelial_0dpa
bzw1b#chr9:425537-427005	chr9:425537-427005	Body	0.086	bzw1b	MA0477.2	chr9:426093-426105	-0.0794931	0.0864847	1.37182	fosl1a	0.126437	fosl1a->bzw1b	4.94243	0.0776482	0	0	2.74651	1.36812	0	1.39636	Superficial_Epithelial_0dpa
bzw1b#chr9:431217-432328	chr9:431217-432328	Body	0.072	bzw1b	MA0522.3	chr9:431584-431594	-0.0513398	0.0178956	0.0918262	tcf3a	0.0820155	tcf3a->bzw1b	7.56307	0.0947528	0	0	0.450357	1.36812	0	1.69286	Superficial_Epithelial_0dpa
bzw1b#chr9:425537-427005	chr9:425537-427005	TSS	0.086	bzw1b	MA1128.1	chr9:426093-426105	-0.0794931	0.0864847	1.37182	fosl1a	0.122265	fosl1a->bzw1b	4.94243	0.0776482	0	0	2.74651	1.36812	0	1.39636	Superficial_Epithelial_0dpa
bzw1b#chr9:425537-427005	chr9:425537-427005	TSS	0.086	bzw1b	MA1130.1	chr9:426093-426104	-0.0688983	0.077717	1.57183	fosl2	0.0837069	fosl2->bzw1b	2.39639	0.0629578	0	0	1.62846	1.36812	0	1.39636	Superficial_Epithelial_0dpa
bzw1b#chr9:425537-427005	chr9:425537-427005	TSS	0.086	bzw1b	MA1137.1	chr9:426093-426105	-0.0794931	0.0864847	1.37182	fosl1a	0.123797	fosl1a->bzw1b	4.94243	0.0776482	0	0	2.74651	1.36812	0	1.39636	Superficial_Epithelial_0dpa
bzw1b#chr9:425537-427005	chr9:425537-427005	TSS	0.086	bzw1b	MA1138.1	chr9:426095-426104	-0.0916086	-0.0694041	1.79937	fosl2	0.084033	fosl2->bzw1b	2.39639	0.0629578	0	0	1.62846	1.36812	0	1.39636	Superficial_Epithelial_0dpa
bzw1b#chr9:425537-427005	chr9:425537-427005	TSS	0.086	bzw1b	MA1142.1	chr9:426095-426104	-0.0916086	-0.0694041	1.79937	fosl1a	0.132058	fosl1a->bzw1b	4.94243	0.0776482	0	0	2.74651	1.36812	0	1.39636	Superficial_Epithelial_0dpa
bzw1b#chr9:425537-427005	chr9:425537-427005	TSS	0.086	bzw1b	MA1144.1	chr9:426095-426104	-0.0916086	-0.0694041	1.79937	fosl2	0.0824373	fosl2->bzw1b	2.39639	0.0629578	0	0	1.62846	1.36812	0	1.39636	Superficial_Epithelial_0dpa
bzw1b#chr9:425537-427005	chr9:425537-427005	TSS	0.086	bzw1b	MA0477.2	chr9:426093-426105	-0.0794931	0.0864847	1.37182	fosl1a	0.126437	fosl1a->bzw1b	4.94243	0.0776482	0	0	2.74651	1.36812	0	1.39636	Superficial_Epithelial_0dpa
bzw1b#chr9:431217-432328	chr9:431217-432328	TSS	0.072	bzw1b	MA0522.3	chr9:431584-431594	-0.0513398	0.0178956	0.0918262	tcf3a	0.0820155	tcf3a->bzw1b	7.56307	0.0947528	0	0	0.450357	1.36812	0	1.69286	Superficial_Epithelial_0dpa
C16H1orf43#chr16:22344791-22346244	chr16:22344791-22346244	TSS	0	C16H1orf43	MA1932.1	chr16:22344963-22344978	-0.112766	0.0934695	0.288812	elk1	0.054423	elk1->C16H1orf43	1.76065	0.045013	0	0	0.111184	0.0168482	0	1.35706	Superficial_Epithelial_0dpa
C18H15orf48#chr18:5525747-5527599	chr18:5525747-5527599	TSS	0	C18H15orf48	MA0073.1	chr18:5526208-5526227	-0.154628	0.220806	0.227572	rreb1a	0.0500665	rreb1a->C18H15orf48	2.84927	0.0570122	0	0	0.266798	0.665252	0	2.28321	Superficial_Epithelial_0dpa
C18H15orf48#chr18:5525747-5527599	chr18:5525747-5527599	TSS	0	C18H15orf48	MA0073.1	chr18:5527156-5527175	0.0995835	0.367457	0.293847	rreb1a	0.0500665	rreb1a->C18H15orf48	2.84927	0.0570122	0	0	0.266798	0.665252	0	2.28321	Superficial_Epithelial_0dpa
C18H15orf48#chr18:5525747-5527599	chr18:5525747-5527599	TSS	0	C18H15orf48	MA0073.1	chr18:5527160-5527179	-0.134401	0.72037	0.47715	rreb1a	0.0500665	rreb1a->C18H15orf48	2.84927	0.0570122	0	0	0.266798	0.665252	0	2.28321	Superficial_Epithelial_0dpa
C2H14orf119#chr2:38224486-38227189	chr2:38224486-38227189	TSS	0	C2H14orf119	MA0481.3	chr2:38224956-38224966	0.250249	0.347965	0.0963041	foxp1b	0.0976319	foxp1b->C2H14orf119	1.08153	0.046541	0	0	0.0287816	0.0316142	0	1.45974	Superficial_Epithelial_0dpa
CABZ01049362.1#chr1:56751044-56751865	chr1:56751044-56751865	Inter	0.08	CABZ01049362.1	MA1116.1	chr1:56751060-56751069	0.0828238	-0.195526	0.550915	rbpjb	0.0631204	rbpjb->CABZ01049362.1	1.45375	0.0581833	0	0	0.343833	0.462297	0	8.93454	Superficial_Epithelial_0dpa
CABZ01068358.1#chr12:45501126-45502401	chr12:45501126-45502401	TSS	0	CABZ01068358.1	MA0517.1	chr12:45502034-45502048	-0.664912	1.55748	1.12917	stat1b	0.151583	stat1b->CABZ01068358.1	5.03514	0.094613	0	0	0.572188	0.2176	0	2.25305	Superficial_Epithelial_0dpa
CABZ01068358.1#chr12:45501126-45502401	chr12:45501126-45502401	TSS	0	CABZ01068358.1	MA0517.1	chr12:45501263-45501277	-0.0411369	0.0325934	0.121839	stat1b	0.151583	stat1b->CABZ01068358.1	5.03514	0.094613	0	0	0.572188	0.2176	0	2.25305	Superficial_Epithelial_0dpa
CABZ01068358.1#chr12:45501126-45502401	chr12:45501126-45502401	TSS	0	CABZ01068358.1	MA0050.3	chr12:45501261-45501275	-0.102917	0.104872	0.186273	irf1b	0.108859	irf1b->CABZ01068358.1	5.69673	0.0882398	0	0	0.586434	0.2176	0	2.25305	Superficial_Epithelial_0dpa
CABZ01068358.1#chr12:45501126-45502401	chr12:45501126-45502401	TSS	0	CABZ01068358.1	MA0050.3	chr12:45502036-45502050	-0.307651	1.12001	0.715817	irf1b	0.108859	irf1b->CABZ01068358.1	5.69673	0.0882398	0	0	0.586434	0.2176	0	2.25305	Superficial_Epithelial_0dpa
CABZ01072077.1#chr13:7291632-7292540	chr13:7291632-7292540	Body	0.063	CABZ01072077.1	MA0511.2	chr13:7292150-7292158	-0.104963	-0.0172505	0.119306	runx2b	0.0696328	runx2b->CABZ01072077.1	29.5344	0.14986	0	0	0.579878	0.793221	0	3.76346	Superficial_Epithelial_0dpa
CABZ01072077.1#chr13:7291632-7292540	chr13:7291632-7292540	TSS	0.063	CABZ01072077.1	MA0511.2	chr13:7292150-7292158	-0.104963	-0.0172505	0.119306	runx2b	0.0696328	runx2b->CABZ01072077.1	29.5344	0.14986	0	0	0.579878	0.793221	0	3.76346	Superficial_Epithelial_0dpa
CABZ01073795.1#chr10:4373805-4375701	chr10:4373805-4375701	Body	0.089	CABZ01073795.1	MA0517.1	chr10:4375209-4375223	-0.0270376	0.102799	0.0146137	stat1b	0.151583	stat1b->CABZ01073795.1	19.4471	0.157215	0	0	0.572188	0.303631	0	1.50226	Superficial_Epithelial_0dpa
CABZ01073795.1#chr10:4373805-4375701	chr10:4373805-4375701	Body	0.089	CABZ01073795.1	MA0772.1	chr10:4375211-4375224	-0.0526798	0.144502	0.0299099	irf7	0.0852944	irf7->CABZ01073795.1	19.7643	0.154045	0	0	0.785997	0.303631	0	1.50226	Superficial_Epithelial_0dpa
CABZ01073795.1#chr10:4373805-4375701	chr10:4373805-4375701	TSS	0.089	CABZ01073795.1	MA0517.1	chr10:4375209-4375223	-0.0270376	0.102799	0.0146137	stat1b	0.151583	stat1b->CABZ01073795.1	19.4471	0.157215	0	0	0.572188	0.303631	0	1.50226	Superficial_Epithelial_0dpa
CABZ01073795.1#chr10:4373805-4375701	chr10:4373805-4375701	TSS	0.089	CABZ01073795.1	MA0772.1	chr10:4375211-4375224	-0.0526798	0.144502	0.0299099	irf7	0.0852944	irf7->CABZ01073795.1	19.7643	0.154045	0	0	0.785997	0.303631	0	1.50226	Superficial_Epithelial_0dpa
CABZ01079241.1#chr5:4434882-4436429	chr5:4434882-4436429	TSS	0	CABZ01079241.1	MA0685.2	chr5:4435328-4435336	-0.340149	-0.183035	1.70495	sp4	0.0623666	sp4->CABZ01079241.1	1.19845	0.0344924	0	0	0.100349	0.0315203	0	1.25021	Superficial_Epithelial_0dpa
cad#chr20:38826806-38828155	chr20:38826806-38828155	TSS	0	cad	MA1127.1	chr20:38827087-38827097	-0.0498563	0.156485	0.357737	fosb	0.150449	fosb->cad	3.24172	0.0796464	0	0	2.01852	0.169716	0	1.25854	Superficial_Epithelial_0dpa
calcoco2#chr12:20640706-20642259	chr12:20640706-20642259	TSS	0	calcoco2	MA0517.1	chr12:20641469-20641483	-0.0643367	0.0520442	0.155733	stat1b	0.151583	stat1b->calcoco2	3.43413	0.0691166	0	0	0.572188	0.714667	0	1.66625	Superficial_Epithelial_0dpa
calcoco2#chr12:20640706-20642259	chr12:20640706-20642259	TSS	0	calcoco2	MA0772.1	chr12:20641468-20641481	-0.0586865	0.0274975	0.165536	irf7	0.0852944	irf7->calcoco2	3.80007	0.0773445	0	0	0.785997	0.714667	0	1.66625	Superficial_Epithelial_0dpa
calm3b#chr21:26726248-26727920	chr21:26726248-26727920	TSS	0	calm3b	MA0609.2	chr21:26727681-26727696	0.210147	0.637108	0.153107	crema	0.0998319	crema->calm3b	3.26795	0.0497799	0	0	1.34056	0.824099	0	1.5621	Superficial_Epithelial_0dpa
camk2g2#chr13:22189504-22190300	chr13:22189504-22190300	TSS	0	camk2g2	MA0670.1	chr13:22190097-22190106	-0.0367054	0.0297806	0.0836269	nfia	0.0599502	nfia->camk2g2	1.61171	0.0723597	0	0	0.0965304	0.229836	0	0.536473	Superficial_Epithelial_0dpa
cant1a#chr3:57764453-57765852	chr3:57764453-57765852	TSS	0	cant1a	MA0028.2	chr3:57765423-57765432	0.0296008	0.123154	0.0201974	elk1	0.050474	elk1->cant1a	1.3954	0.0312199	0	0	0.111184	0.475294	0	1.62666	Superficial_Epithelial_0dpa
canx#chr14:16475871-16477949	chr14:16475871-16477949	Body	0.073	canx	MA0058.3	chr14:16476854-16476863	0.224987	0.1844	1.6405	max	0.0781341	max->canx	5.99449	0.0708002	0	0	0.485417	0.875133	0	1.75428	Superficial_Epithelial_0dpa
canx#chr14:16475871-16477949	chr14:16475871-16477949	Body	0.073	canx	MA1644.1	chr14:16476910-16476920	0.643858	0.483364	0.16473	nfyc	0.0550306	nfyc->canx	2.06665	0.0645838	0	0	0.256556	0.875133	0	1.75428	Superficial_Epithelial_0dpa
canx#chr14:16475871-16477949	chr14:16475871-16477949	Body	0.073	canx	MA0050.3	chr14:16476167-16476181	-0.117403	0.235733	0.216224	irf1b	0.108859	irf1b->canx	1.81262	0.053666	0	0	0.586434	0.875133	0	1.75428	Superficial_Epithelial_0dpa
canx#chr14:16475871-16477949	chr14:16475871-16477949	TSS	0.073	canx	MA0058.3	chr14:16476854-16476863	0.224987	0.1844	1.6405	max	0.0781341	max->canx	5.99449	0.0708002	0	0	0.485417	0.875133	0	1.75428	Superficial_Epithelial_0dpa
canx#chr14:16475871-16477949	chr14:16475871-16477949	TSS	0.073	canx	MA1644.1	chr14:16476910-16476920	0.643858	0.483364	0.16473	nfyc	0.0550306	nfyc->canx	2.06665	0.0645838	0	0	0.256556	0.875133	0	1.75428	Superficial_Epithelial_0dpa
canx#chr14:16475871-16477949	chr14:16475871-16477949	TSS	0.073	canx	MA0050.3	chr14:16476167-16476181	-0.117403	0.235733	0.216224	irf1b	0.108859	irf1b->canx	1.81262	0.053666	0	0	0.586434	0.875133	0	1.75428	Superficial_Epithelial_0dpa
capns1b#chr15:29116007-29118002	chr15:29116007-29118002	TSS	0	capns1b	MA1515.1	chr15:29117761-29117771	0.314043	0.486585	-0.0306859	klf2b	0.107486	klf2b->capns1b	3.61592	0.0739707	0	0	1.42664	1.40012	0	2.25739	Superficial_Epithelial_0dpa
caprin1b#chr18:38268647-38271525	chr18:38268647-38271525	TSS	0	caprin1b	MA1470.1	chr18:38269626-38269645	-0.0693923	0.122708	0.0518376	bach2b	0.193379	bach2b->caprin1b	4.69957	0.0889712	0	0	0.209666	0.338569	0	1.10848	Superficial_Epithelial_0dpa
casp10#chr9:1339319-1339850	chr9:1339319-1339850	TSS	0	casp10	MA0050.3	chr9:1339747-1339761	-0.032225	-0.0258345	0.224789	irf1b	0.108859	irf1b->casp10	1.57093	0.0401835	0	0	0.586434	0.993143	0	1.78793	Superficial_Epithelial_0dpa
casp6b.1#chr3:32957820-32960442	chr3:32957820-32960442	Body	0.054	casp6b.1	MA0511.2	chr3:32958740-32958748	-0.0091674	0.143533	-0.0314452	runx2b	0.0696328	runx2b->casp6b.1	1.87738	0.0419621	0	0	0.579878	0.344115	0	2.04768	Superficial_Epithelial_0dpa
casp6b.1#chr3:32957820-32960442	chr3:32957820-32960442	TSS	0.054	casp6b.1	MA0511.2	chr3:32958740-32958748	-0.0091674	0.143533	-0.0314452	runx2b	0.0696328	runx2b->casp6b.1	1.87738	0.0419621	0	0	0.579878	0.344115	0	2.04768	Superficial_Epithelial_0dpa
cavin2b#chr6:8734602-8738209	chr6:8734602-8738209	TSS	0	cavin2b	MA0478.1	chr6:8734876-8734886	-0.353402	0.47077	0.707719	fosl2	0.0934041	fosl2->cavin2b	10.7687	0.0905124	0	0	1.62846	1.39461	0	1.98321	Superficial_Epithelial_0dpa
cavin2b#chr6:8734602-8738209	chr6:8734602-8738209	TSS	0	cavin2b	MA1130.1	chr6:8734874-8734885	-0.345159	0.475191	0.66528	fosl2	0.0837069	fosl2->cavin2b	10.7687	0.0905124	0	0	1.62846	1.39461	0	1.98321	Superficial_Epithelial_0dpa
cavin2b#chr6:8734602-8738209	chr6:8734602-8738209	TSS	0	cavin2b	MA0477.2	chr6:8734874-8734886	-0.329377	0.44595	0.585538	fosl1a	0.126437	fosl1a->cavin2b	1.92166	0.0413412	0	0	2.74651	1.39461	0	1.98321	Superficial_Epithelial_0dpa
cavin2b#chr6:8734602-8738209	chr6:8734602-8738209	TSS	0	cavin2b	MA0480.2	chr6:8736663-8736673	-0.164866	0.0620095	0.277748	foxo1a	0.0795932	foxo1a->cavin2b	3.29073	0.0670549	0	0	2.13262	1.39461	0	1.98321	Superficial_Epithelial_0dpa
cavin2b#chr6:8734602-8738209	chr6:8734602-8738209	TSS	0	cavin2b	MA1633.2	chr6:8734876-8734884	-0.276952	0.374037	0.39079	bach1b	0.0601907	bach1b->cavin2b	1.33261	0.0634188	0	0	0.925602	1.39461	0	1.98321	Superficial_Epithelial_0dpa
cbsb#chr9:9227915-9229352	chr9:9227915-9229352	TSS	0	cbsb	MA0478.1	chr9:9228168-9228178	0.0282739	0.471184	0.320875	fosl2	0.0934041	fosl2->cbsb	5.58484	0.0802981	0	0	1.62846	1.04024	0	1.90564	Superficial_Epithelial_0dpa
cbsb#chr9:9227915-9229352	chr9:9227915-9229352	TSS	0	cbsb	MA1131.1	chr9:9228599-9228609	-0.356367	0.174492	1.61965	fosl2	0.0630162	fosl2->cbsb	5.58484	0.0802981	0	0	1.62846	1.04024	0	1.90564	Superficial_Epithelial_0dpa
cbsb#chr9:9227915-9229352	chr9:9227915-9229352	TSS	0	cbsb	MA1138.1	chr9:9228169-9228178	0.104924	0.404256	0.280738	fosl2	0.084033	fosl2->cbsb	5.58484	0.0802981	0	0	1.62846	1.04024	0	1.90564	Superficial_Epithelial_0dpa
cbsb#chr9:9227915-9229352	chr9:9227915-9229352	TSS	0	cbsb	MA1144.1	chr9:9228169-9228178	0.104924	0.404256	0.280738	fosl2	0.0824373	fosl2->cbsb	5.58484	0.0802981	0	0	1.62846	1.04024	0	1.90564	Superficial_Epithelial_0dpa
cbsb#chr9:9227915-9229352	chr9:9227915-9229352	TSS	0	cbsb	MA1633.2	chr9:9228170-9228178	0.117362	0.376105	0.320558	bach1b	0.0601907	bach1b->cbsb	2.01599	0.0600867	0	0	0.925602	1.04024	0	1.90564	Superficial_Epithelial_0dpa
ccdc187#chr23:30045138-30046118	chr23:30045138-30046118	TSS	0	ccdc187	MA1131.1	chr23:30045738-30045748	0.0172383	1.50936	-0.397934	fosl2	0.0630162	fosl2->ccdc187	2.42108	0.0504566	0	0	1.62846	0.858307	0	2.20554	Superficial_Epithelial_0dpa
ccdc187#chr23:30045138-30046118	chr23:30045138-30046118	TSS	0	ccdc187	MA1131.1	chr23:30045739-30045749	0.303824	1.05003	-0.674411	fosl2	0.0630162	fosl2->ccdc187	2.42108	0.0504566	0	0	1.62846	0.858307	0	2.20554	Superficial_Epithelial_0dpa
ccdc187#chr23:30045138-30046118	chr23:30045138-30046118	TSS	0	ccdc187	MA1139.1	chr23:30045738-30045749	-0.0874369	1.4449	-0.215799	fosl2	0.0569617	fosl2->ccdc187	2.42108	0.0504566	0	0	1.62846	0.858307	0	2.20554	Superficial_Epithelial_0dpa
ccdc187#chr23:30045138-30046118	chr23:30045138-30046118	TSS	0	ccdc187	MA1139.1	chr23:30045738-30045749	-0.0874369	1.4449	-0.215799	fosl2	0.0569617	fosl2->ccdc187	2.42108	0.0504566	0	0	1.62846	0.858307	0	2.20554	Superficial_Epithelial_0dpa
ccdc82#chr21:40685442-40686723	chr21:40685442-40686723	TSS	0	ccdc82	MA1099.2	chr21:40685898-40685907	-0.141278	0.167954	0.127046	her6	0.0672081	her6->ccdc82	2.53733	0.0642465	0	0	0.024186	0.0305272	0	1.31526	Superficial_Epithelial_0dpa
ccdc82#chr21:40685442-40686723	chr21:40685442-40686723	TSS	0	ccdc82	MA1099.2	chr21:40686042-40686051	-0.140702	0.0108938	0.270453	her6	0.0672081	her6->ccdc82	2.53733	0.0642465	0	0	0.024186	0.0305272	0	1.31526	Superficial_Epithelial_0dpa
ccl19a.1#chr5:13382402-13383215	chr5:13382402-13383215	Body	0.08	ccl19a.1	MA1117.1	chr5:13382792-13382802	-0.0719521	0.0028529	0.152833	relb	0.127546	relb->ccl19a.1	10.6139	0.131874	0	0	0.585144	0.38968	0	5.34179	Superficial_Epithelial_0dpa
ccl19a.1#chr5:13352813-13354500	chr5:13352813-13354500	TSS	0	ccl19a.1	MA0517.1	chr5:13353124-13353138	0.0807621	0.340803	-0.102103	stat1b	0.151583	stat1b->ccl19a.1	2.66758	0.0883485	0	0	0.572188	0.38968	0	1.65117	Superficial_Epithelial_0dpa
ccl19a.1#chr5:13352813-13354500	chr5:13352813-13354500	TSS	0	ccl19a.1	MA0517.1	chr5:13354021-13354035	-0.188809	0.381113	0.279403	stat1b	0.151583	stat1b->ccl19a.1	2.66758	0.0883485	0	0	0.572188	0.38968	0	1.65117	Superficial_Epithelial_0dpa
ccl19a.1#chr5:13352813-13354500	chr5:13352813-13354500	TSS	0	ccl19a.1	MA0653.1	chr5:13353126-13353140	0.122725	0.286349	-0.144715	irf9	0.0507077	irf9->ccl19a.1	1.22536	0.0653758	0	0	0.4291	0.38968	0	1.65117	Superficial_Epithelial_0dpa
ccl27a#chr8:1156761-1157895	chr8:1156761-1157895	Inter	0.093	ccl27a	MA0734.3	chr8:1157600-1157612	-0.0490665	0.13291	0.0458398	gli2a	0.101933	gli2a->ccl27a	2.00373	0.074109	0	0	0.0506187	0.524187	0	1.46723	Superficial_Epithelial_0dpa
ccl27a#chr8:1156761-1157895	chr8:1156761-1157895	Inter	0.093	ccl27a	MA0734.3	chr8:1157182-1157194	-0.290796	0.472362	0.827895	gli2a	0.101933	gli2a->ccl27a	2.00373	0.074109	0	0	0.0506187	0.524187	0	1.46723	Superficial_Epithelial_0dpa
ccnd2a#chr25:17238353-17239487	chr25:17238353-17239487	Body	0.072	ccnd2a	MA0670.1	chr25:17239236-17239245	-0.0146432	0.349481	0.793528	nfia	0.0599502	nfia->ccnd2a	6.76077	0.110042	0	0	0.0965304	0.748147	0	2.00833	Superficial_Epithelial_0dpa
ccnd2a#chr25:17238353-17239487	chr25:17238353-17239487	Body	0.072	ccnd2a	MA0481.3	chr25:17239006-17239016	0.864276	-0.910715	1.84251	foxp1b	0.0976319	foxp1b->ccnd2a	2.23985	0.0854227	0	0	0.0287816	0.748147	0	2.00833	Superficial_Epithelial_0dpa
ccnd2a#chr25:17238353-17239487	chr25:17238353-17239487	TSS	0.072	ccnd2a	MA0670.1	chr25:17239236-17239245	-0.0146432	0.349481	0.793528	nfia	0.0599502	nfia->ccnd2a	6.76077	0.110042	0	0	0.0965304	0.748147	0	2.00833	Superficial_Epithelial_0dpa
ccnd2a#chr25:17238353-17239487	chr25:17238353-17239487	TSS	0.072	ccnd2a	MA0481.3	chr25:17239006-17239016	0.864276	-0.910715	1.84251	foxp1b	0.0976319	foxp1b->ccnd2a	2.23985	0.0854227	0	0	0.0287816	0.748147	0	2.00833	Superficial_Epithelial_0dpa
ccng2#chr21:5798637-5801214	chr21:5798637-5801214	TSS	0	ccng2	MA1126.1	chr21:5799003-5799018	-0.077943	0.0815322	0.0584406	fosab	0.10646	fosab->ccng2	2.20654	0.0666885	0	0	2.65236	2.10367	0	1.6781	Superficial_Epithelial_0dpa
ccng2#chr21:5798637-5801214	chr21:5798637-5801214	TSS	0	ccng2	MA0480.2	chr21:5800685-5800695	-0.0542392	0.121378	0.0284393	foxo1a	0.0795932	foxo1a->ccng2	1.36898	0.0763832	0	0	2.13262	2.10367	0	1.6781	Superficial_Epithelial_0dpa
ccni#chr21:5797626-5798213	chr21:5797626-5798213	TSS	0	ccni	MA0478.1	chr21:5798088-5798098	-0.130994	-0.00283901	0.204278	fosl2	0.0934041	fosl2->ccni	2.4335	0.0543499	0	0	1.62846	1.009	0	4.82108	Superficial_Epithelial_0dpa
ccni#chr21:5797626-5798213	chr21:5797626-5798213	TSS	0	ccni	MA0478.1	chr21:5798147-5798157	-0.125464	0.207181	0.199693	fosl2	0.0934041	fosl2->ccni	2.4335	0.0543499	0	0	1.62846	1.009	0	4.82108	Superficial_Epithelial_0dpa
ccni#chr21:5797626-5798213	chr21:5797626-5798213	TSS	0	ccni	MA0591.1	chr21:5798144-5798158	-0.118788	0.174551	0.258724	bach1b	0.0525138	bach1b->ccni	1.26726	0.0530738	0	0	0.925602	1.009	0	4.82108	Superficial_Epithelial_0dpa
ccnl1a#chr18:41510908-41512934	chr18:41510908-41512934	Body	0.115	ccnl1a	MA0600.2	chr18:41511257-41511272	-0.189128	0.324432	0.120367	rfx2	0.076513	rfx2->ccnl1a	8.04774	0.106027	0	0	0.545874	0.667657	0	1.66155	Superficial_Epithelial_0dpa
ccnl1a#chr18:41510908-41512934	chr18:41510908-41512934	Body	0.115	ccnl1a	MA0600.2	chr18:41511257-41511272	-0.189128	0.324432	0.120367	rfx2	0.076513	rfx2->ccnl1a	8.04774	0.106027	0	0	0.545874	0.667657	0	1.66155	Superficial_Epithelial_0dpa
ccnl1a#chr18:41510908-41512934	chr18:41510908-41512934	Body	0.115	ccnl1a	MA0851.1	chr18:41511672-41511688	-0.0937513	0.0510997	0.297578	foxj3	0.0770929	foxj3->ccnl1a	3.95563	0.0791511	0	0	0.643544	0.667657	0	1.66155	Superficial_Epithelial_0dpa
ccnl1a#chr18:41510908-41512934	chr18:41510908-41512934	TSS	0.115	ccnl1a	MA0600.2	chr18:41511257-41511272	-0.189128	0.324432	0.120367	rfx2	0.076513	rfx2->ccnl1a	8.04774	0.106027	0	0	0.545874	0.667657	0	1.66155	Superficial_Epithelial_0dpa
ccnl1a#chr18:41510908-41512934	chr18:41510908-41512934	TSS	0.115	ccnl1a	MA0600.2	chr18:41511257-41511272	-0.189128	0.324432	0.120367	rfx2	0.076513	rfx2->ccnl1a	8.04774	0.106027	0	0	0.545874	0.667657	0	1.66155	Superficial_Epithelial_0dpa
ccnl1a#chr18:41510908-41512934	chr18:41510908-41512934	TSS	0.115	ccnl1a	MA0851.1	chr18:41511672-41511688	-0.0937513	0.0510997	0.297578	foxj3	0.0770929	foxj3->ccnl1a	3.95563	0.0791511	0	0	0.643544	0.667657	0	1.66155	Superficial_Epithelial_0dpa
ccnl1b#chr2:36673042-36674418	chr2:36673042-36674418	TSS	0	ccnl1b	MA0840.1	chr2:36673968-36673979	-0.0792794	1.06254	1.37669	creb5b	0.128114	creb5b->ccnl1b	6.42884	0.0862957	0	0	0.361049	0.960804	0	1.48658	Superficial_Epithelial_0dpa
ccnl1b#chr2:36673042-36674418	chr2:36673042-36674418	TSS	0	ccnl1b	MA0840.1	chr2:36673953-36673964	-0.571727	2.30276	1.37805	creb5b	0.128114	creb5b->ccnl1b	6.42884	0.0862957	0	0	0.361049	0.960804	0	1.48658	Superficial_Epithelial_0dpa
ccnl1b#chr2:36673042-36674418	chr2:36673042-36674418	TSS	0	ccnl1b	MA0840.1	chr2:36673968-36673979	-0.0792794	1.06254	1.37669	creb5b	0.128114	creb5b->ccnl1b	6.42884	0.0862957	0	0	0.361049	0.960804	0	1.48658	Superficial_Epithelial_0dpa
ccnl1b#chr2:36673042-36674418	chr2:36673042-36674418	TSS	0	ccnl1b	MA1133.1	chr2:36673968-36673979	-0.0792794	1.06254	1.37669	junbb	0.090798	junbb->ccnl1b	1.73617	0.0625103	0	0	1.09612	0.960804	0	1.48658	Superficial_Epithelial_0dpa
ccnl1b#chr2:36673042-36674418	chr2:36673042-36674418	TSS	0	ccnl1b	MA1136.1	chr2:36673969-36673978	0.184888	0.4404	1.45486	junbb	0.0827228	junbb->ccnl1b	1.73617	0.0625103	0	0	1.09612	0.960804	0	1.48658	Superficial_Epithelial_0dpa
ccnl1b#chr2:36673042-36674418	chr2:36673042-36674418	TSS	0	ccnl1b	MA1136.1	chr2:36673969-36673978	0.184888	0.4404	1.45486	junbb	0.0827228	junbb->ccnl1b	1.73617	0.0625103	0	0	1.09612	0.960804	0	1.48658	Superficial_Epithelial_0dpa
ccnl1b#chr2:36673042-36674418	chr2:36673042-36674418	TSS	0	ccnl1b	MA1139.1	chr2:36673968-36673979	-0.0792794	1.06254	1.37669	junbb	0.0817679	junbb->ccnl1b	1.73617	0.0625103	0	0	1.09612	0.960804	0	1.48658	Superficial_Epithelial_0dpa
ccnl1b#chr2:36673042-36674418	chr2:36673042-36674418	TSS	0	ccnl1b	MA1139.1	chr2:36673968-36673979	-0.0792794	1.06254	1.37669	junbb	0.0817679	junbb->ccnl1b	1.73617	0.0625103	0	0	1.09612	0.960804	0	1.48658	Superficial_Epithelial_0dpa
ccnl1b#chr2:36673042-36674418	chr2:36673042-36674418	TSS	0	ccnl1b	MA1140.2	chr2:36673968-36673979	-0.0792794	1.06254	1.37669	junbb	0.0902616	junbb->ccnl1b	1.73617	0.0625103	0	0	1.09612	0.960804	0	1.48658	Superficial_Epithelial_0dpa
ccnl1b#chr2:36673042-36674418	chr2:36673042-36674418	TSS	0	ccnl1b	MA1140.2	chr2:36673953-36673964	-0.571727	2.30276	1.37805	junbb	0.0902616	junbb->ccnl1b	1.73617	0.0625103	0	0	1.09612	0.960804	0	1.48658	Superficial_Epithelial_0dpa
ccnl1b#chr2:36673042-36674418	chr2:36673042-36674418	TSS	0	ccnl1b	MA1140.2	chr2:36673968-36673979	-0.0792794	1.06254	1.37669	junbb	0.0902616	junbb->ccnl1b	1.73617	0.0625103	0	0	1.09612	0.960804	0	1.48658	Superficial_Epithelial_0dpa
ccnl1b#chr2:36673042-36674418	chr2:36673042-36674418	TSS	0	ccnl1b	MA0609.2	chr2:36673951-36673966	-0.286669	1.92944	1.10385	crema	0.0998319	crema->ccnl1b	3.79811	0.0794195	0	0	1.34056	0.960804	0	1.48658	Superficial_Epithelial_0dpa
ccnl1b#chr2:36673042-36674418	chr2:36673042-36674418	TSS	0	ccnl1b	MA0609.2	chr2:36673966-36673981	-0.31382	1.43402	1.4711	crema	0.0998319	crema->ccnl1b	3.79811	0.0794195	0	0	1.34056	0.960804	0	1.48658	Superficial_Epithelial_0dpa
ccnl1b#chr2:36673042-36674418	chr2:36673042-36674418	TSS	0	ccnl1b	MA0609.2	chr2:36673951-36673966	-0.286669	1.92944	1.10385	crema	0.0998319	crema->ccnl1b	3.79811	0.0794195	0	0	1.34056	0.960804	0	1.48658	Superficial_Epithelial_0dpa
ccnl1b#chr2:36673042-36674418	chr2:36673042-36674418	TSS	0	ccnl1b	MA0609.2	chr2:36673966-36673981	-0.31382	1.43402	1.4711	crema	0.0998319	crema->ccnl1b	3.79811	0.0794195	0	0	1.34056	0.960804	0	1.48658	Superficial_Epithelial_0dpa
ccnt2a#chr9:23241719-23242868	chr9:23241719-23242868	TSS	0	ccnt2a	MA0840.1	chr9:23242007-23242018	-0.430778	1.11358	0.980875	creb5b	0.128114	creb5b->ccnt2a	1.31567	0.0425517	0	0	0.361049	0.709138	0	2.09788	Superficial_Epithelial_0dpa
ccnt2b#chr22:12162094-12163933	chr22:12162094-12163933	TSS	0	ccnt2b	MA0006.1	chr22:12162871-12162876	-0.0688927	0.161768	0.0794093	arnt	0.0564374	arnt->ccnt2b	1.74036	0.0451296	0	0	0.282055	0.296644	0	1.23401	Superficial_Epithelial_0dpa
ccser2b#chr12:13059230-13060113	chr12:13059230-13060113	Body	0.142	ccser2b	MA0100.3	chr12:13059773-13059782	-0.0476461	0.107421	0.0803413	myb	0.0642334	myb->ccser2b	1.23216	0.0873007	0	0	0.170312	0.258895	0	0.263306	Superficial_Epithelial_0dpa
ccser2b#chr12:13080567-13081651	chr12:13080567-13081651	Body	0.123	ccser2b	MA0734.3	chr12:13080940-13080952	-0.0495058	0.126684	0.269875	gli2a	0.101933	gli2a->ccser2b	12.2022	0.177564	0	0	0.0506187	0.258895	0	1.00425	Superficial_Epithelial_0dpa
ccser2b#chr12:13080567-13081651	chr12:13080567-13081651	TSS	0.123	ccser2b	MA0734.3	chr12:13080940-13080952	-0.0495058	0.126684	0.269875	gli2a	0.101933	gli2a->ccser2b	12.2022	0.177564	0	0	0.0506187	0.258895	0	1.00425	Superficial_Epithelial_0dpa
cd40#chr23:37834128-37836266	chr23:37834128-37836266	Body	0.055	cd40	MA1117.1	chr23:37835846-37835856	-0.209625	0.0741346	0.59066	relb	0.127546	relb->cd40	9.84411	0.14511	0	0	0.585144	0.14006	0	1.57296	Superficial_Epithelial_0dpa
cd40#chr23:37834128-37836266	chr23:37834128-37836266	Body	0.055	cd40	MA0050.3	chr23:37835464-37835478	-0.0511205	0.261661	0.261221	irf1b	0.108859	irf1b->cd40	3.18589	0.0929595	0	0	0.586434	0.14006	0	1.57296	Superficial_Epithelial_0dpa
cd40#chr23:37834128-37836266	chr23:37834128-37836266	Body	0.055	cd40	MA0050.3	chr23:37834919-37834933	-0.0557328	0.0274198	0.13764	irf1b	0.108859	irf1b->cd40	3.18589	0.0929595	0	0	0.586434	0.14006	0	1.57296	Superficial_Epithelial_0dpa
cd40#chr23:37834128-37836266	chr23:37834128-37836266	TSS	0.055	cd40	MA1117.1	chr23:37835846-37835856	-0.209625	0.0741346	0.59066	relb	0.127546	relb->cd40	9.84411	0.14511	0	0	0.585144	0.14006	0	1.57296	Superficial_Epithelial_0dpa
cd40#chr23:37834128-37836266	chr23:37834128-37836266	TSS	0.055	cd40	MA0050.3	chr23:37835464-37835478	-0.0511205	0.261661	0.261221	irf1b	0.108859	irf1b->cd40	3.18589	0.0929595	0	0	0.586434	0.14006	0	1.57296	Superficial_Epithelial_0dpa
cd40#chr23:37834128-37836266	chr23:37834128-37836266	TSS	0.055	cd40	MA0050.3	chr23:37834919-37834933	-0.0557328	0.0274198	0.13764	irf1b	0.108859	irf1b->cd40	3.18589	0.0929595	0	0	0.586434	0.14006	0	1.57296	Superficial_Epithelial_0dpa
cd44a#chr7:49867391-49868697	chr7:49867391-49868697	Inter	0.061	cd44a	MA1131.1	chr7:49868035-49868045	-0.105796	0.161735	0.079786	fosl2	0.0630162	fosl2->cd44a	1.46758	0.053428	0	0	1.62846	1.55939	0	1.7055	Superficial_Epithelial_0dpa
cd74a#chr14:3037435-3040417	chr14:3037435-3040417	TSS	0	cd74a	MA0656.1	chr14:3040134-3040145	-0.0608163	0.3267	0.202365	jdp2b	0.138912	jdp2b->cd74a	3.07085	0.171197	0	0	1.27829	3.43394	0	2.20047	Superficial_Epithelial_0dpa
cd74a#chr14:3037435-3040417	chr14:3037435-3040417	TSS	0	cd74a	MA0656.1	chr14:3040134-3040145	-0.0608163	0.3267	0.202365	jdp2b	0.138912	jdp2b->cd74a	3.07085	0.171197	0	0	1.27829	3.43394	0	2.20047	Superficial_Epithelial_0dpa
cd74a#chr14:3037435-3040417	chr14:3037435-3040417	TSS	0	cd74a	MA1133.1	chr14:3040134-3040145	-0.0608163	0.3267	0.202365	jun	0.05518	jun->cd74a	38.3664	0.271041	0	0	2.12638	3.43394	0	2.20047	Superficial_Epithelial_0dpa
cd74a#chr14:3037435-3040417	chr14:3037435-3040417	TSS	0	cd74a	MA1133.1	chr14:3040134-3040145	-0.0608163	0.3267	0.202365	junbb	0.090798	junbb->cd74a	2.33561	0.150669	0	0	1.09612	3.43394	0	2.20047	Superficial_Epithelial_0dpa
cd74a#chr14:3037435-3040417	chr14:3037435-3040417	TSS	0	cd74a	MA1140.2	chr14:3040134-3040145	-0.0608163	0.3267	0.202365	junbb	0.0902616	junbb->cd74a	2.33561	0.150669	0	0	1.09612	3.43394	0	2.20047	Superficial_Epithelial_0dpa
cd74a#chr14:3037435-3040417	chr14:3037435-3040417	TSS	0	cd74a	MA0609.2	chr14:3040132-3040147	-0.10031	0.295101	0.292558	crema	0.0998319	crema->cd74a	2.97695	0.0979987	0	0	1.34056	3.43394	0	2.20047	Superficial_Epithelial_0dpa
cd74a#chr14:3037435-3040417	chr14:3037435-3040417	TSS	0	cd74a	MA0609.2	chr14:3040132-3040147	-0.10031	0.295101	0.292558	crema	0.0998319	crema->cd74a	2.97695	0.0979987	0	0	1.34056	3.43394	0	2.20047	Superficial_Epithelial_0dpa
cd83#chr16:38393422-38394800	chr16:38393422-38394800	Body	0.067	cd83	MA1129.1	chr16:38393655-38393664	-0.0908435	0.20521	0.0529079	jun	0.0526979	jun->cd83	1.41254	0.058092	0	0	2.12638	0.0481482	0	1.47179	Superficial_Epithelial_0dpa
cd83#chr16:38393422-38394800	chr16:38393422-38394800	Body	0.067	cd83	MA0640.2	chr16:38394307-38394320	-0.035855	-0.00393902	0.153402	elf3	0.0502292	elf3->cd83	3.51739	0.101422	0	0	1.46398	0.0481482	0	1.47179	Superficial_Epithelial_0dpa
cd83#chr16:38393422-38394800	chr16:38393422-38394800	Body	0.067	cd83	MA0050.3	chr16:38394318-38394332	-0.184113	0.163971	0.324599	irf1b	0.108859	irf1b->cd83	11.6936	0.111435	0	0	0.586434	0.0481482	0	1.47179	Superficial_Epithelial_0dpa
cd83#chr16:38381464-38382982	chr16:38381464-38382982	Inter	0.091	cd83	MA0050.3	chr16:38381906-38381920	-0.020837	0.116636	0.0316032	irf1b	0.108859	irf1b->cd83	11.6936	0.111435	0	0	0.586434	0.0481482	0	1.77381	Superficial_Epithelial_0dpa
cd83#chr16:38393422-38394800	chr16:38393422-38394800	TSS	0.067	cd83	MA1129.1	chr16:38393655-38393664	-0.0908435	0.20521	0.0529079	jun	0.0526979	jun->cd83	1.41254	0.058092	0	0	2.12638	0.0481482	0	1.47179	Superficial_Epithelial_0dpa
cd83#chr16:38393422-38394800	chr16:38393422-38394800	TSS	0.067	cd83	MA0640.2	chr16:38394307-38394320	-0.035855	-0.00393902	0.153402	elf3	0.0502292	elf3->cd83	3.51739	0.101422	0	0	1.46398	0.0481482	0	1.47179	Superficial_Epithelial_0dpa
cd83#chr16:38393422-38394800	chr16:38393422-38394800	TSS	0.067	cd83	MA0050.3	chr16:38394318-38394332	-0.184113	0.163971	0.324599	irf1b	0.108859	irf1b->cd83	11.6936	0.111435	0	0	0.586434	0.0481482	0	1.47179	Superficial_Epithelial_0dpa
cd9b#chr4:4255843-4256759	chr4:4255843-4256759	TSS	0	cd9b	MA1136.1	chr4:4255858-4255867	-0.103656	0.0585407	0.305815	junbb	0.0827228	junbb->cd9b	1.10851	0.0656366	0	0	1.09612	2.67683	0	2.5071	Superficial_Epithelial_0dpa
cdc42se1#chr16:38333125-38334244	chr16:38333125-38334244	TSS	0	cdc42se1	MA0147.3	chr16:38334035-38334046	0.10768	-0.00946049	0.132158	mycb	0.052455	mycb->cdc42se1	1.28124	0.0623248	0	0	0.281657	0.345336	0	1.57561	Superficial_Epithelial_0dpa
cdca4#chr20:26939560-26940796	chr20:26939560-26940796	TSS	0	cdca4	MA1570.1	chr20:26939565-26939574	-0.107083	0.155962	0.107094	tfap4	0.0635638	tfap4->cdca4	3.0853	0.0422073	0	0	0.033836	0.203448	0	1.12413	Superficial_Epithelial_0dpa
cdca4#chr20:26939560-26940796	chr20:26939560-26940796	TSS	0	cdca4	MA1570.1	chr20:26939565-26939574	-0.107083	0.155962	0.107094	tfap4	0.0635638	tfap4->cdca4	3.0853	0.0422073	0	0	0.033836	0.203448	0	1.12413	Superficial_Epithelial_0dpa
cdh31#chr7:55148228-55149415	chr7:55148228-55149415	TSS	0	cdh31	MA0525.2	chr7:55148953-55148970	-0.046473	0.0460212	0.0795216	tp63	0.180472	tp63->cdh31	1.25183	0.106209	0	0	0.439364	0.039442	0	0.286904	Superficial_Epithelial_0dpa
cdip1#chr3:46409573-46410899	chr3:46409573-46410899	TSS	0	cdip1	MA1470.1	chr3:46410166-46410185	-0.0298364	0.0186956	0.127867	bach2b	0.193379	bach2b->cdip1	2.04566	0.10598	0	0	0.209666	0.0146694	0	0.420722	Superficial_Epithelial_0dpa
cdk16#chr8:8445273-8446769	chr8:8445273-8446769	TSS	0	cdk16	MA1470.1	chr8:8445488-8445507	-0.0784649	0.220953	0.380562	bach2b	0.193379	bach2b->cdk16	10.9262	0.111292	0	0	0.209666	0.720772	0	1.65504	Superficial_Epithelial_0dpa
cdk16#chr8:8445273-8446769	chr8:8445273-8446769	TSS	0	cdk16	MA1470.1	chr8:8445488-8445507	-0.0784649	0.220953	0.380562	bach2b	0.193379	bach2b->cdk16	10.9262	0.111292	0	0	0.209666	0.720772	0	1.65504	Superficial_Epithelial_0dpa
cdk19#chr20:2948527-2951419	chr20:2948527-2951419	TSS	0	cdk19	MA1099.2	chr20:2949161-2949170	-1.42224	1.96922	1.66353	her6	0.0672081	her6->cdk19	1.12774	0.0991288	0	0	0.024186	0.0308608	0	1.55803	Superficial_Epithelial_0dpa
cdkn1a#chr22:606802-608227	chr22:606802-608227	TSS	0	cdkn1a	MA1951.1	chr22:607147-607160	-0.495306	0.706593	1.78299	fosab	0.154414	fosab->cdkn1a	4.7098	0.0941303	0	0	2.65236	0.302501	0	1.60091	Superficial_Epithelial_0dpa
cdkn1a#chr22:606802-608227	chr22:606802-608227	TSS	0	cdkn1a	MA1951.1	chr22:607147-607160	-0.495306	0.706593	1.78299	fosab	0.154414	fosab->cdkn1a	4.7098	0.0941303	0	0	2.65236	0.302501	0	1.60091	Superficial_Epithelial_0dpa
cdkn2aip#chr7:52949273-52950319	chr7:52949273-52950319	TSS	0	cdkn2aip	MA1130.1	chr7:52949903-52949914	-0.127884	0.0481935	0.352318	fosl2	0.0837069	fosl2->cdkn2aip	2.53907	0.0408669	0	0	1.62846	0.00877874	0	0.859434	Superficial_Epithelial_0dpa
cds1#chr5:40039218-40040765	chr5:40039218-40040765	TSS	0	cds1	MA0591.1	chr5:40040346-40040360	-0.476529	0.431165	1.35919	bach1b	0.0525138	bach1b->cds1	11.1795	0.100985	0	0	0.925602	1.06867	0	1.84022	Superficial_Epithelial_0dpa
cds1#chr5:40039218-40040765	chr5:40039218-40040765	TSS	0	cds1	MA1142.1	chr5:40039681-40039690	-0.207735	0.671885	0.443458	fosl1a	0.132058	fosl1a->cds1	13.9123	0.120871	0	0	2.74651	1.06867	0	1.84022	Superficial_Epithelial_0dpa
cds1#chr5:40039218-40040765	chr5:40039218-40040765	TSS	0	cds1	MA0089.2	chr5:40040346-40040361	-0.320349	0.378911	1.12412	nfe2l1a	0.0627577	nfe2l1a->cds1	4.73537	0.0991757	0	0	1.05576	1.06867	0	1.84022	Superficial_Epithelial_0dpa
cds1#chr5:40039218-40040765	chr5:40039218-40040765	TSS	0	cds1	MA1633.2	chr5:40039682-40039690	-0.230817	0.748876	0.45089	bach1b	0.0601907	bach1b->cds1	11.1795	0.100985	0	0	0.925602	1.06867	0	1.84022	Superficial_Epithelial_0dpa
cdt1#chr7:55518268-55519254	chr7:55518268-55519254	TSS	0	cdt1	MA0464.2	chr7:55518497-55518506	0.00764968	0.2836	0.845139	bhlhe40	0.0593062	bhlhe40->cdt1	2.78931	0.0416829	0	0	1.1581	0.000981616	0	1.34614	Superficial_Epithelial_0dpa
cebpb#chr8:28446604-28447136	chr8:28446604-28447136	Inter	0.071	cebpb	MA0517.1	chr8:28446827-28446841	0.210132	0.259899	0.405715	stat1a	0.0569912	stat1a->cebpb	2.20641	0.0393759	0	0	1.21024	1.85557	0	2.83208	Superficial_Epithelial_0dpa
cebpb#chr8:28447818-28450125	chr8:28447818-28450125	TSS	0	cebpb	MA1128.1	chr8:28448003-28448015	-0.102726	0.250199	0.10832	fosl1a	0.122265	fosl1a->cebpb	26.5303	0.125313	0	0	2.74651	1.85557	0	1.5564	Superficial_Epithelial_0dpa
cebpb#chr8:28447818-28450125	chr8:28447818-28450125	TSS	0	cebpb	MA1128.1	chr8:28448701-28448713	-0.113041	0.0877122	0.131575	fosl1a	0.122265	fosl1a->cebpb	26.5303	0.125313	0	0	2.74651	1.85557	0	1.5564	Superficial_Epithelial_0dpa
cebpb#chr8:28447818-28450125	chr8:28447818-28450125	TSS	0	cebpb	MA0477.2	chr8:28448701-28448713	-0.113041	0.0877122	0.131575	fosl1a	0.126437	fosl1a->cebpb	26.5303	0.125313	0	0	2.74651	1.85557	0	1.5564	Superficial_Epithelial_0dpa
cebpb#chr8:28447818-28450125	chr8:28447818-28450125	TSS	0	cebpb	MA0050.3	chr8:28448169-28448183	-0.0285292	0.11227	0.0181668	irf1b	0.108859	irf1b->cebpb	2.64628	0.051403	0	0	0.586434	1.85557	0	1.5564	Superficial_Epithelial_0dpa
celsr1a#chr4:28334039-28335807	chr4:28334039-28335807	TSS	0	celsr1a	MA0073.1	chr4:28335395-28335414	0.0365106	0.397451	0.10241	rreb1a	0.0500665	rreb1a->celsr1a	2.8625	0.0599436	0	0	0.266798	0.833957	0	1.69278	Superficial_Epithelial_0dpa
cep170b#chr17:1544127-1545670	chr17:1544127-1545670	Body	0.06	cep170b	MA0851.1	chr17:1544889-1544905	-0.0350557	-0.105483	0.445486	foxj3	0.0770929	foxj3->cep170b	1.20391	0.0521597	0	0	0.643544	0.822536	0	1.94171	Superficial_Epithelial_0dpa
cep170b#chr17:1544127-1545670	chr17:1544127-1545670	Body	0.06	cep170b	MA1955.1	chr17:1545205-1545218	-0.0526747	0.170517	0.572137	elk3	0.0570459	elk3->cep170b	3.53976	0.0713169	0	0	0.322853	0.822536	0	1.94171	Superficial_Epithelial_0dpa
cep170b#chr17:1544127-1545670	chr17:1544127-1545670	TSS	0.06	cep170b	MA0851.1	chr17:1544889-1544905	-0.0350557	-0.105483	0.445486	foxj3	0.0770929	foxj3->cep170b	1.20391	0.0521597	0	0	0.643544	0.822536	0	1.94171	Superficial_Epithelial_0dpa
cep170b#chr17:1544127-1545670	chr17:1544127-1545670	TSS	0.06	cep170b	MA1955.1	chr17:1545205-1545218	-0.0526747	0.170517	0.572137	elk3	0.0570459	elk3->cep170b	3.53976	0.0713169	0	0	0.322853	0.822536	0	1.94171	Superficial_Epithelial_0dpa
cep350#chr8:14608226-14609624	chr8:14608226-14609624	TSS	0	cep350	MA0517.1	chr8:14608485-14608499	-0.0359675	0.056015	0.0821849	stat1b	0.151583	stat1b->cep350	1.09605	0.0542759	0	0	0.572188	0.921442	0	1.1815	Superficial_Epithelial_0dpa
cep85l#chr20:41859038-41860027	chr20:41859038-41860027	TSS	0	cep85l	MA0511.2	chr20:41859490-41859498	-0.0120402	0.409787	0.14795	runx2a	0.0567643	runx2a->cep85l	1.16538	0.0593472	0	0	0.105006	0.144723	0	0.780145	Superficial_Epithelial_0dpa
cers2a#chr19:8811553-8813398	chr19:8811553-8813398	TSS	0	cers2a	MA1131.1	chr19:8811751-8811761	-0.0720589	0.0963633	0.44008	fosl2	0.0630162	fosl2->cers2a	22.8923	0.130955	0	0	1.62846	1.17338	0	1.55533	Superficial_Epithelial_0dpa
cers5#chr22:5820878-5822611	chr22:5820878-5822611	TSS	0	cers5	MA0522.3	chr22:5821318-5821328	-0.0766635	0.0666317	0.127539	tcf3a	0.0820155	tcf3a->cers5	2.10578	0.0611321	0	0	0.450357	1.0726	0	1.6771	Superficial_Epithelial_0dpa
cert1b#chr21:2603303-2604315	chr21:2603303-2604315	Body	0.105	cert1b	MA0695.1	chr21:2603466-2603477	-0.0917564	0.128499	0.107541	zbtb7c	0.077786	zbtb7c->cert1b	15.4398	0.120341	0	0	0.123195	0.74959	0	0.542082	Superficial_Epithelial_0dpa
cert1b#chr21:2603303-2604315	chr21:2603303-2604315	Body	0.105	cert1b	MA0851.1	chr21:2603471-2603487	-0.0481061	0.0680822	0.0594386	foxj3	0.0770929	foxj3->cert1b	1.42508	0.0630826	0	0	0.643544	0.74959	0	0.542082	Superficial_Epithelial_0dpa
cert1b#chr21:2607378-2608218	chr21:2607378-2608218	Body	0.109	cert1b	MA0478.1	chr21:2607829-2607839	-0.0957672	-0.022037	0.255418	fosl2	0.0934041	fosl2->cert1b	2.35578	0.0574579	0	0	1.62846	0.74959	0	0.292063	Superficial_Epithelial_0dpa
cert1b#chr21:2607378-2608218	chr21:2607378-2608218	Body	0.109	cert1b	MA0478.1	chr21:2607831-2607841	-0.156453	0.0475221	0.338348	fosl2	0.0934041	fosl2->cert1b	2.35578	0.0574579	0	0	1.62846	0.74959	0	0.292063	Superficial_Epithelial_0dpa
cert1b#chr21:2607378-2608218	chr21:2607378-2608218	Body	0.109	cert1b	MA1128.1	chr21:2607829-2607841	-0.109859	0.022721	0.282747	fosl1a	0.122265	fosl1a->cert1b	2.1739	0.046842	0	0	2.74651	0.74959	0	0.292063	Superficial_Epithelial_0dpa
cert1b#chr21:2607378-2608218	chr21:2607378-2608218	Body	0.109	cert1b	MA1130.1	chr21:2607829-2607840	-0.0890578	-0.0219487	0.233563	fosl2	0.0837069	fosl2->cert1b	2.35578	0.0574579	0	0	1.62846	0.74959	0	0.292063	Superficial_Epithelial_0dpa
cert1b#chr21:2607378-2608218	chr21:2607378-2608218	Body	0.109	cert1b	MA1138.1	chr21:2607830-2607839	-0.14127	0.0320711	0.313226	fosl2	0.084033	fosl2->cert1b	2.35578	0.0574579	0	0	1.62846	0.74959	0	0.292063	Superficial_Epithelial_0dpa
cert1b#chr21:2607378-2608218	chr21:2607378-2608218	Body	0.109	cert1b	MA1138.1	chr21:2607831-2607840	-0.136151	0.0238715	0.308615	fosl2	0.084033	fosl2->cert1b	2.35578	0.0574579	0	0	1.62846	0.74959	0	0.292063	Superficial_Epithelial_0dpa
cert1b#chr21:2607378-2608218	chr21:2607378-2608218	Body	0.109	cert1b	MA1144.1	chr21:2607830-2607839	-0.14127	0.0320711	0.313226	fosl2	0.0824373	fosl2->cert1b	2.35578	0.0574579	0	0	1.62846	0.74959	0	0.292063	Superficial_Epithelial_0dpa
cert1b#chr21:2607378-2608218	chr21:2607378-2608218	Body	0.109	cert1b	MA1144.1	chr21:2607831-2607840	-0.136151	0.0238715	0.308615	fosl2	0.0824373	fosl2->cert1b	2.35578	0.0574579	0	0	1.62846	0.74959	0	0.292063	Superficial_Epithelial_0dpa
cert1b#chr21:2607378-2608218	chr21:2607378-2608218	Body	0.109	cert1b	MA1101.2	chr21:2607826-2607844	-0.0526719	0.0857062	0.134804	bach2b	0.0657534	bach2b->cert1b	18.0314	0.145314	0	0	0.209666	0.74959	0	0.292063	Superficial_Epithelial_0dpa
cert1b#chr21:2607378-2608218	chr21:2607378-2608218	Body	0.109	cert1b	MA1101.2	chr21:2607826-2607844	-0.0526719	0.0857062	0.134804	bach2b	0.0657534	bach2b->cert1b	18.0314	0.145314	0	0	0.209666	0.74959	0	0.292063	Superficial_Epithelial_0dpa
cert1b#chr21:2607378-2608218	chr21:2607378-2608218	Body	0.109	cert1b	MA0477.2	chr21:2607829-2607841	-0.109859	0.022721	0.282747	fosl1a	0.126437	fosl1a->cert1b	2.1739	0.046842	0	0	2.74651	0.74959	0	0.292063	Superficial_Epithelial_0dpa
cert1b#chr21:2623450-2624575	chr21:2623450-2624575	Inter	0.079	cert1b	MA1131.1	chr21:2624342-2624352	-0.888103	1.72644	1.62657	fosl2	0.0630162	fosl2->cert1b	2.35578	0.0574579	0	0	1.62846	0.74959	0	1.76093	Superficial_Epithelial_0dpa
cert1b#chr21:2623450-2624575	chr21:2623450-2624575	Inter	0.079	cert1b	MA1131.1	chr21:2624343-2624353	-1.08833	2.00138	1.85816	fosl2	0.0630162	fosl2->cert1b	2.35578	0.0574579	0	0	1.62846	0.74959	0	1.76093	Superficial_Epithelial_0dpa
cert1b#chr21:2623450-2624575	chr21:2623450-2624575	Inter	0.079	cert1b	MA1139.1	chr21:2624342-2624353	-0.814095	2.03824	1.63991	fosl2	0.0569617	fosl2->cert1b	2.35578	0.0574579	0	0	1.62846	0.74959	0	1.76093	Superficial_Epithelial_0dpa
cert1b#chr21:2623450-2624575	chr21:2623450-2624575	Inter	0.079	cert1b	MA1139.1	chr21:2624342-2624353	-0.814095	2.03824	1.63991	fosl2	0.0569617	fosl2->cert1b	2.35578	0.0574579	0	0	1.62846	0.74959	0	1.76093	Superficial_Epithelial_0dpa
cert1b#chr21:2623450-2624575	chr21:2623450-2624575	Inter	0.079	cert1b	MA1470.1	chr21:2624338-2624357	-0.55463	1.54903	1.24898	bach2b	0.193379	bach2b->cert1b	18.0314	0.145314	0	0	0.209666	0.74959	0	1.76093	Superficial_Epithelial_0dpa
cfd#chr13:13677634-13678867	chr13:13677634-13678867	Inter	0.076	cfd	MA1570.1	chr13:13678246-13678255	-0.189135	0.261232	0.197714	tfap4	0.0635638	tfap4->cfd	1.10056	0.0516537	0	0	0.033836	0.348323	0	0.378608	Superficial_Epithelial_0dpa
cfd#chr13:13677634-13678867	chr13:13677634-13678867	Inter	0.076	cfd	MA1570.1	chr13:13678246-13678255	-0.189135	0.261232	0.197714	tfap4	0.0635638	tfap4->cfd	1.10056	0.0516537	0	0	0.033836	0.348323	0	0.378608	Superficial_Epithelial_0dpa
cfl1l#chr13:33606364-33608508	chr13:33606364-33608508	TSS	0	cfl1l	MA0478.1	chr13:33606737-33606747	0.231275	1.04046	-0.487315	fosl2	0.0934041	fosl2->cfl1l	2.54441	0.0648687	0	0	1.62846	2.34471	0	2.0861	Superficial_Epithelial_0dpa
cfl1l#chr13:33606364-33608508	chr13:33606364-33608508	TSS	0	cfl1l	MA1131.1	chr13:33608133-33608143	0.000505659	0.135059	-0.00293073	fosl2	0.0630162	fosl2->cfl1l	2.54441	0.0648687	0	0	1.62846	2.34471	0	2.0861	Superficial_Epithelial_0dpa
cfl1l#chr13:33606364-33608508	chr13:33606364-33608508	TSS	0	cfl1l	MA1139.1	chr13:33608133-33608144	-0.0265808	0.148683	0.0493135	fosl2	0.0569617	fosl2->cfl1l	2.54441	0.0648687	0	0	1.62846	2.34471	0	2.0861	Superficial_Epithelial_0dpa
cfl1l#chr13:33606364-33608508	chr13:33606364-33608508	TSS	0	cfl1l	MA1139.1	chr13:33608133-33608144	-0.0265808	0.148683	0.0493135	fosl2	0.0569617	fosl2->cfl1l	2.54441	0.0648687	0	0	1.62846	2.34471	0	2.0861	Superficial_Epithelial_0dpa
cflara#chr11:30340488-30341861	chr11:30340488-30341861	TSS	0	cflara	MA0101.1	chr11:30340651-30340660	-0.0312024	0.105629	0.22605	rel	0.0845928	rel->cflara	3.38744	0.060894	0	0	0.777053	0.840426	0	2.2946	Superficial_Epithelial_0dpa
cflara#chr11:30340488-30341861	chr11:30340488-30341861	TSS	0	cflara	MA0653.1	chr11:30341307-30341321	-0.315567	0.474681	2.33787	irf9	0.0507077	irf9->cflara	3.60038	0.070155	0	0	0.4291	0.840426	0	2.2946	Superficial_Epithelial_0dpa
cflara#chr11:30340488-30341861	chr11:30340488-30341861	TSS	0	cflara	MA1126.1	chr11:30341470-30341485	0.492803	0.821779	0.917991	fosab	0.10646	fosab->cflara	2.48812	0.060152	0	0	2.65236	0.840426	0	2.2946	Superficial_Epithelial_0dpa
cgas#chr13:27327653-27329610	chr13:27327653-27329610	TSS	0	cgas	MA1131.1	chr13:27328086-27328096	-0.3731	0.850289	0.693141	fosl2	0.0630162	fosl2->cgas	1.20972	0.0635475	0	0	1.62846	1.15287	0	2.57986	Superficial_Epithelial_0dpa
cgas#chr13:27327653-27329610	chr13:27327653-27329610	TSS	0	cgas	MA1131.1	chr13:27328087-27328097	-0.84971	1.44382	1.18121	fosl2	0.0630162	fosl2->cgas	1.20972	0.0635475	0	0	1.62846	1.15287	0	2.57986	Superficial_Epithelial_0dpa
cgas#chr13:27327653-27329610	chr13:27327653-27329610	TSS	0	cgas	MA1136.1	chr13:27328087-27328096	-0.80037	1.51377	1.13145	junba	0.0510403	junba->cgas	4.27509	0.0733647	0	0	1.93563	1.15287	0	2.57986	Superficial_Epithelial_0dpa
cgas#chr13:27327653-27329610	chr13:27327653-27329610	TSS	0	cgas	MA1136.1	chr13:27328087-27328096	-0.80037	1.51377	1.13145	junba	0.0510403	junba->cgas	4.27509	0.0733647	0	0	1.93563	1.15287	0	2.57986	Superficial_Epithelial_0dpa
cgas#chr13:27327653-27329610	chr13:27327653-27329610	TSS	0	cgas	MA1139.1	chr13:27328086-27328097	-0.453934	0.853437	0.929712	fosl2	0.0569617	fosl2->cgas	1.20972	0.0635475	0	0	1.62846	1.15287	0	2.57986	Superficial_Epithelial_0dpa
cgas#chr13:27327653-27329610	chr13:27327653-27329610	TSS	0	cgas	MA1139.1	chr13:27328086-27328097	-0.453934	0.853437	0.929712	fosl2	0.0569617	fosl2->cgas	1.20972	0.0635475	0	0	1.62846	1.15287	0	2.57986	Superficial_Epithelial_0dpa
chac1#chr20:28268545-28271326	chr20:28268545-28271326	Body	0.124	chac1	MA1133.1	chr20:28269415-28269426	0.308793	0.23022	-0.00284862	jun	0.05518	jun->chac1	22.261	0.174808	0	0	2.12638	3.00766	0	6.35132	Superficial_Epithelial_0dpa
chac1#chr20:28268545-28271326	chr20:28268545-28271326	Body	0.124	chac1	MA1133.1	chr20:28269415-28269426	0.308793	0.23022	-0.00284862	junbb	0.090798	junbb->chac1	2.32897	0.102378	0	0	1.09612	3.00766	0	6.35132	Superficial_Epithelial_0dpa
chac2#chr12:24059593-24061650	chr12:24059593-24061650	Body	0.121	chac2	MA1515.1	chr12:24061312-24061322	-0.00444065	0.711753	0.0497639	klf2b	0.107486	klf2b->chac2	1.49094	0.0567375	0	0	1.42664	1.30064	0	2.24414	Superficial_Epithelial_0dpa
chac2#chr12:24059593-24061650	chr12:24059593-24061650	TSS	0.121	chac2	MA1515.1	chr12:24061312-24061322	-0.00444065	0.711753	0.0497639	klf2b	0.107486	klf2b->chac2	1.49094	0.0567375	0	0	1.42664	1.30064	0	2.24414	Superficial_Epithelial_0dpa
chchd7#chr7:58728934-58731651	chr7:58728934-58731651	TSS	0	chchd7	MA0651.2	chr7:58729457-58729468	0.0262467	0.104873	-0.00248417	hoxc11a	0.0508956	hoxc11a->chchd7	2.18288	0.0539757	0	0	0.0732707	0.0294007	0	1.61135	Superficial_Epithelial_0dpa
chd9#chr7:36483792-36485297	chr7:36483792-36485297	Body	0.07	chd9	MA0481.3	chr7:36484212-36484222	0.0695515	0.00148837	0.983667	foxp1a	0.0835482	foxp1a->chd9	1.20259	0.0516451	0	0	0.460207	0.949116	0	1.64445	Superficial_Epithelial_0dpa
chd9#chr7:36538341-36539669	chr7:36538341-36539669	Body	0.065	chd9	MA1127.1	chr7:36538971-36538981	0.0878333	0.0661164	1.32284	fosb	0.150449	fosb->chd9	3.17289	0.0712323	0	0	2.01852	0.949116	0	1.74096	Superficial_Epithelial_0dpa
chd9#chr7:36538341-36539669	chr7:36538341-36539669	Body	0.065	chd9	MA1136.1	chr7:36538972-36538981	0.169358	0.0179745	1.22782	fosb	0.133295	fosb->chd9	3.17289	0.0712323	0	0	2.01852	0.949116	0	1.74096	Superficial_Epithelial_0dpa
chd9#chr7:36538341-36539669	chr7:36538341-36539669	Body	0.065	chd9	MA1136.1	chr7:36538972-36538981	0.169358	0.0179745	1.22782	fosb	0.133295	fosb->chd9	3.17289	0.0712323	0	0	2.01852	0.949116	0	1.74096	Superficial_Epithelial_0dpa
chd9#chr7:36538341-36539669	chr7:36538341-36539669	Body	0.065	chd9	MA1527.1	chr7:36539170-36539186	-0.148974	0.764306	0.329525	nfic	0.072754	nfic->chd9	1.28728	0.0614941	0	0	0.510769	0.949116	0	1.74096	Superficial_Epithelial_0dpa
chd9#chr7:36538341-36539669	chr7:36538341-36539669	Body	0.065	chd9	MA1951.1	chr7:36538970-36538983	0.0697945	0.347143	1.17057	fosab	0.154414	fosab->chd9	3.75968	0.072519	0	0	2.65236	0.949116	0	1.74096	Superficial_Epithelial_0dpa
chd9#chr7:36538341-36539669	chr7:36538341-36539669	Body	0.065	chd9	MA1951.1	chr7:36538970-36538983	0.0697945	0.347143	1.17057	fosab	0.154414	fosab->chd9	3.75968	0.072519	0	0	2.65236	0.949116	0	1.74096	Superficial_Epithelial_0dpa
chd9#chr7:36483792-36485297	chr7:36483792-36485297	TSS	0.07	chd9	MA0481.3	chr7:36484212-36484222	0.0695515	0.00148837	0.983667	foxp1a	0.0835482	foxp1a->chd9	1.20259	0.0516451	0	0	0.460207	0.949116	0	1.64445	Superficial_Epithelial_0dpa
chd9#chr7:36538341-36539669	chr7:36538341-36539669	TSS	0.065	chd9	MA1127.1	chr7:36538971-36538981	0.0878333	0.0661164	1.32284	fosb	0.150449	fosb->chd9	3.17289	0.0712323	0	0	2.01852	0.949116	0	1.74096	Superficial_Epithelial_0dpa
chd9#chr7:36538341-36539669	chr7:36538341-36539669	TSS	0.065	chd9	MA1136.1	chr7:36538972-36538981	0.169358	0.0179745	1.22782	fosb	0.133295	fosb->chd9	3.17289	0.0712323	0	0	2.01852	0.949116	0	1.74096	Superficial_Epithelial_0dpa
chd9#chr7:36538341-36539669	chr7:36538341-36539669	TSS	0.065	chd9	MA1136.1	chr7:36538972-36538981	0.169358	0.0179745	1.22782	fosb	0.133295	fosb->chd9	3.17289	0.0712323	0	0	2.01852	0.949116	0	1.74096	Superficial_Epithelial_0dpa
chd9#chr7:36538341-36539669	chr7:36538341-36539669	TSS	0.065	chd9	MA1527.1	chr7:36539170-36539186	-0.148974	0.764306	0.329525	nfic	0.072754	nfic->chd9	1.28728	0.0614941	0	0	0.510769	0.949116	0	1.74096	Superficial_Epithelial_0dpa
chd9#chr7:36538341-36539669	chr7:36538341-36539669	TSS	0.065	chd9	MA1951.1	chr7:36538970-36538983	0.0697945	0.347143	1.17057	fosab	0.154414	fosab->chd9	3.75968	0.072519	0	0	2.65236	0.949116	0	1.74096	Superficial_Epithelial_0dpa
chd9#chr7:36538341-36539669	chr7:36538341-36539669	TSS	0.065	chd9	MA1951.1	chr7:36538970-36538983	0.0697945	0.347143	1.17057	fosab	0.154414	fosab->chd9	3.75968	0.072519	0	0	2.65236	0.949116	0	1.74096	Superficial_Epithelial_0dpa
chka#chr18:21122333-21123555	chr18:21122333-21123555	TSS	0	chka	MA1116.1	chr18:21123284-21123293	0.00508849	-0.0595124	0.254706	rbpjb	0.0631204	rbpjb->chka	1.70739	0.0654986	0	0	0.343833	0.4424	0	2.29473	Superficial_Epithelial_0dpa
chl1a#chr23:11285442-11286706	chr23:11285442-11286706	Body	0.134	chl1a	MA0525.2	chr23:11285914-11285931	-0.0393306	0.111631	0.0768763	tp63	0.180472	tp63->chl1a	10.7303	0.124456	0	0	0.439364	0.650764	0	0.249647	Superficial_Epithelial_0dpa
chl1a#chr23:11285442-11286706	chr23:11285442-11286706	TSS	0.134	chl1a	MA0525.2	chr23:11285914-11285931	-0.0393306	0.111631	0.0768763	tp63	0.180472	tp63->chl1a	10.7303	0.124456	0	0	0.439364	0.650764	0	0.249647	Superficial_Epithelial_0dpa
chmp2a#chr12:27030045-27031257	chr12:27030045-27031257	TSS	0	chmp2a	MA1515.1	chr12:27030953-27030963	-0.106983	0.0868061	0.49842	klf2b	0.107486	klf2b->chmp2a	4.50934	0.0692633	0	0	1.42664	1.15527	0	1.79651	Superficial_Epithelial_0dpa
chmp4ba#chr6:49912166-49913514	chr6:49912166-49913514	Body	0.082	chmp4ba	MA1133.1	chr6:49912608-49912619	-0.0808278	0.138342	0.277539	junbb	0.090798	junbb->chmp4ba	1.40002	0.0544734	0	0	1.09612	1.32112	0	2.60795	Superficial_Epithelial_0dpa
chmp4ba#chr6:49901221-49902375	chr6:49901221-49902375	TSS	0	chmp4ba	MA1101.2	chr6:49901432-49901450	-0.0747378	0.832969	1.4443	bach2b	0.0657534	bach2b->chmp4ba	4.11199	0.0943995	0	0	0.209666	1.32112	0	1.79865	Superficial_Epithelial_0dpa
chmp4ba#chr6:49901221-49902375	chr6:49901221-49902375	TSS	0	chmp4ba	MA1101.2	chr6:49901432-49901450	-0.0747378	0.832969	1.4443	bach2b	0.0657534	bach2b->chmp4ba	4.11199	0.0943995	0	0	0.209666	1.32112	0	1.79865	Superficial_Epithelial_0dpa
chmp4ba#chr6:49901221-49902375	chr6:49901221-49902375	TSS	0	chmp4ba	MA1470.1	chr6:49901427-49901446	0.203967	0.509306	1.01109	bach2b	0.193379	bach2b->chmp4ba	4.11199	0.0943995	0	0	0.209666	1.32112	0	1.79865	Superficial_Epithelial_0dpa
chmp4ba#chr6:49901221-49902375	chr6:49901221-49902375	TSS	0	chmp4ba	MA1140.2	chr6:49901431-49901442	0.272421	0.599948	-0.0765893	junbb	0.0902616	junbb->chmp4ba	1.40002	0.0544734	0	0	1.09612	1.32112	0	1.79865	Superficial_Epithelial_0dpa
chmp4bb#chr8:45361663-45362962	chr8:45361663-45362962	TSS	0	chmp4bb	MA1127.1	chr8:45361722-45361732	0.00848751	0.0240617	1.6186	fosb	0.150449	fosb->chmp4bb	1.41042	0.0363377	0	0	2.01852	1.41743	0	1.96449	Superficial_Epithelial_0dpa
chmp4bb#chr8:45361663-45362962	chr8:45361663-45362962	TSS	0	chmp4bb	MA1127.1	chr8:45362181-45362191	-0.102093	0.105186	0.081407	fosb	0.150449	fosb->chmp4bb	1.41042	0.0363377	0	0	2.01852	1.41743	0	1.96449	Superficial_Epithelial_0dpa
chmp4bb#chr8:45361663-45362962	chr8:45361663-45362962	TSS	0	chmp4bb	MA1127.1	chr8:45361723-45361733	0.300685	-0.266818	1.26324	fosb	0.150449	fosb->chmp4bb	1.41042	0.0363377	0	0	2.01852	1.41743	0	1.96449	Superficial_Epithelial_0dpa
chmp4bb#chr8:45361663-45362962	chr8:45361663-45362962	TSS	0	chmp4bb	MA1127.1	chr8:45361733-45361743	0.287498	-0.0814302	1.33636	fosb	0.150449	fosb->chmp4bb	1.41042	0.0363377	0	0	2.01852	1.41743	0	1.96449	Superficial_Epithelial_0dpa
chmp4bb#chr8:45361663-45362962	chr8:45361663-45362962	TSS	0	chmp4bb	MA1133.1	chr8:45361722-45361733	0.214842	-0.263292	1.23274	junbb	0.090798	junbb->chmp4bb	1.3339	0.0498335	0	0	1.09612	1.41743	0	1.96449	Superficial_Epithelial_0dpa
chmp4bb#chr8:45361663-45362962	chr8:45361663-45362962	TSS	0	chmp4bb	MA1133.1	chr8:45361732-45361743	0.102334	0.0907459	1.2828	junbb	0.090798	junbb->chmp4bb	1.3339	0.0498335	0	0	1.09612	1.41743	0	1.96449	Superficial_Epithelial_0dpa
chmp4bb#chr8:45361663-45362962	chr8:45361663-45362962	TSS	0	chmp4bb	MA1133.1	chr8:45362181-45362192	-0.0939765	0.135221	0.0740599	junbb	0.090798	junbb->chmp4bb	1.3339	0.0498335	0	0	1.09612	1.41743	0	1.96449	Superficial_Epithelial_0dpa
chmp4bb#chr8:45361663-45362962	chr8:45361663-45362962	TSS	0	chmp4bb	MA1133.1	chr8:45361722-45361733	0.214842	-0.263292	1.23274	junbb	0.090798	junbb->chmp4bb	1.3339	0.0498335	0	0	1.09612	1.41743	0	1.96449	Superficial_Epithelial_0dpa
chmp4bb#chr8:45361663-45362962	chr8:45361663-45362962	TSS	0	chmp4bb	MA1133.1	chr8:45361732-45361743	0.102334	0.0907459	1.2828	junbb	0.090798	junbb->chmp4bb	1.3339	0.0498335	0	0	1.09612	1.41743	0	1.96449	Superficial_Epithelial_0dpa
chmp4bb#chr8:45361663-45362962	chr8:45361663-45362962	TSS	0	chmp4bb	MA1136.1	chr8:45361723-45361732	0.0822794	0.0375575	1.57736	fosb	0.133295	fosb->chmp4bb	1.41042	0.0363377	0	0	2.01852	1.41743	0	1.96449	Superficial_Epithelial_0dpa
chmp4bb#chr8:45361663-45362962	chr8:45361663-45362962	TSS	0	chmp4bb	MA1136.1	chr8:45361723-45361732	0.0822794	0.0375575	1.57736	junbb	0.0827228	junbb->chmp4bb	1.3339	0.0498335	0	0	1.09612	1.41743	0	1.96449	Superficial_Epithelial_0dpa
chmp4bb#chr8:45361663-45362962	chr8:45361663-45362962	TSS	0	chmp4bb	MA1136.1	chr8:45361733-45361742	0.191177	0.0592213	1.58681	fosb	0.133295	fosb->chmp4bb	1.41042	0.0363377	0	0	2.01852	1.41743	0	1.96449	Superficial_Epithelial_0dpa
chmp4bb#chr8:45361663-45362962	chr8:45361663-45362962	TSS	0	chmp4bb	MA1136.1	chr8:45361733-45361742	0.191177	0.0592213	1.58681	junbb	0.0827228	junbb->chmp4bb	1.3339	0.0498335	0	0	1.09612	1.41743	0	1.96449	Superficial_Epithelial_0dpa
chmp4bb#chr8:45361663-45362962	chr8:45361663-45362962	TSS	0	chmp4bb	MA1136.1	chr8:45362182-45362191	-0.0816819	0.0607019	0.0633587	fosb	0.133295	fosb->chmp4bb	1.41042	0.0363377	0	0	2.01852	1.41743	0	1.96449	Superficial_Epithelial_0dpa
chmp4bb#chr8:45361663-45362962	chr8:45361663-45362962	TSS	0	chmp4bb	MA1136.1	chr8:45362182-45362191	-0.0816819	0.0607019	0.0633587	junbb	0.0827228	junbb->chmp4bb	1.3339	0.0498335	0	0	1.09612	1.41743	0	1.96449	Superficial_Epithelial_0dpa
chmp4bb#chr8:45361663-45362962	chr8:45361663-45362962	TSS	0	chmp4bb	MA1136.1	chr8:45361723-45361732	0.0822794	0.0375575	1.57736	fosb	0.133295	fosb->chmp4bb	1.41042	0.0363377	0	0	2.01852	1.41743	0	1.96449	Superficial_Epithelial_0dpa
chmp4bb#chr8:45361663-45362962	chr8:45361663-45362962	TSS	0	chmp4bb	MA1136.1	chr8:45361723-45361732	0.0822794	0.0375575	1.57736	junbb	0.0827228	junbb->chmp4bb	1.3339	0.0498335	0	0	1.09612	1.41743	0	1.96449	Superficial_Epithelial_0dpa
chmp4bb#chr8:45361663-45362962	chr8:45361663-45362962	TSS	0	chmp4bb	MA1139.1	chr8:45361722-45361733	0.214842	-0.263292	1.23274	junbb	0.0817679	junbb->chmp4bb	1.3339	0.0498335	0	0	1.09612	1.41743	0	1.96449	Superficial_Epithelial_0dpa
chmp4bb#chr8:45361663-45362962	chr8:45361663-45362962	TSS	0	chmp4bb	MA1139.1	chr8:45362181-45362192	-0.0939765	0.135221	0.0740599	junbb	0.0817679	junbb->chmp4bb	1.3339	0.0498335	0	0	1.09612	1.41743	0	1.96449	Superficial_Epithelial_0dpa
chmp4bb#chr8:45361663-45362962	chr8:45361663-45362962	TSS	0	chmp4bb	MA1139.1	chr8:45361722-45361733	0.214842	-0.263292	1.23274	junbb	0.0817679	junbb->chmp4bb	1.3339	0.0498335	0	0	1.09612	1.41743	0	1.96449	Superficial_Epithelial_0dpa
chmp4bb#chr8:45361663-45362962	chr8:45361663-45362962	TSS	0	chmp4bb	MA1139.1	chr8:45362181-45362192	-0.0939765	0.135221	0.0740599	junbb	0.0817679	junbb->chmp4bb	1.3339	0.0498335	0	0	1.09612	1.41743	0	1.96449	Superficial_Epithelial_0dpa
chmp4bb#chr8:45361663-45362962	chr8:45361663-45362962	TSS	0	chmp4bb	MA1140.2	chr8:45361722-45361733	0.214842	-0.263292	1.23274	junbb	0.0902616	junbb->chmp4bb	1.3339	0.0498335	0	0	1.09612	1.41743	0	1.96449	Superficial_Epithelial_0dpa
chmp4bb#chr8:45361663-45362962	chr8:45361663-45362962	TSS	0	chmp4bb	MA1140.2	chr8:45361732-45361743	0.102334	0.0907459	1.2828	junbb	0.0902616	junbb->chmp4bb	1.3339	0.0498335	0	0	1.09612	1.41743	0	1.96449	Superficial_Epithelial_0dpa
chmp4bb#chr8:45361663-45362962	chr8:45361663-45362962	TSS	0	chmp4bb	MA1140.2	chr8:45361722-45361733	0.214842	-0.263292	1.23274	junbb	0.0902616	junbb->chmp4bb	1.3339	0.0498335	0	0	1.09612	1.41743	0	1.96449	Superficial_Epithelial_0dpa
chmp4c#chr24:11075081-11076701	chr24:11075081-11076701	TSS	0	chmp4c	MA1515.1	chr24:11075507-11075517	-0.0324579	0.173658	-0.00827539	klf2b	0.107486	klf2b->chmp4c	7.16684	0.119659	0	0	1.42664	1.37728	0	2.08187	Superficial_Epithelial_0dpa
chmp6b#chr12:35605808-35607766	chr12:35605808-35607766	Body	0.051	chmp6b	MA0591.1	chr12:35607560-35607574	-0.0199928	0.0388493	0.08957	bach1b	0.0525138	bach1b->chmp6b	1.87705	0.0442721	0	0	0.925602	0.820678	0	2.05767	Superficial_Epithelial_0dpa
chmp6b#chr12:35587772-35588876	chr12:35587772-35588876	TSS	0	chmp6b	MA0517.1	chr12:35588177-35588191	-0.0160784	0.00933721	0.518222	stat1b	0.151583	stat1b->chmp6b	3.64852	0.0443446	0	0	0.572188	0.820678	0	1.36396	Superficial_Epithelial_0dpa
chst11#chr4:9171143-9171838	chr4:9171143-9171838	Body	0.085	chst11	MA1101.2	chr4:9171435-9171453	0.0513724	0.114148	0.165485	bach2b	0.0657534	bach2b->chst11	2.37193	0.124903	0	0	0.209666	0.112897	0	0.746279	Superficial_Epithelial_0dpa
chst11#chr4:9171143-9171838	chr4:9171143-9171838	Body	0.085	chst11	MA1101.2	chr4:9171435-9171453	0.0513724	0.114148	0.165485	bach2b	0.0657534	bach2b->chst11	2.37193	0.124903	0	0	0.209666	0.112897	0	0.746279	Superficial_Epithelial_0dpa
CHST13#chr23:34990105-34991293	chr23:34990105-34991293	Body	0.149	CHST13	MA1136.1	chr23:34990480-34990489	-0.345334	0.411311	0.982521	junba	0.0510403	junba->CHST13	1.29027	0.0514545	0	0	1.93563	0.126393	0	0.73169	Superficial_Epithelial_0dpa
CHST13#chr23:34990105-34991293	chr23:34990105-34991293	Body	0.149	CHST13	MA1136.1	chr23:34990480-34990489	-0.345334	0.411311	0.982521	junba	0.0510403	junba->CHST13	1.29027	0.0514545	0	0	1.93563	0.126393	0	0.73169	Superficial_Epithelial_0dpa
CHST13#chr23:34990105-34991293	chr23:34990105-34991293	Body	0.149	CHST13	MA0624.2	chr23:34990584-34990595	-0.353472	0.621577	0.478754	nfatc1	0.0822448	nfatc1->CHST13	2.34259	0.0913912	0	0	0.0105534	0.126393	0	0.73169	Superficial_Epithelial_0dpa
CHST13#chr23:34990105-34991293	chr23:34990105-34991293	TSS	0.149	CHST13	MA1136.1	chr23:34990480-34990489	-0.345334	0.411311	0.982521	junba	0.0510403	junba->CHST13	1.29027	0.0514545	0	0	1.93563	0.126393	0	0.73169	Superficial_Epithelial_0dpa
CHST13#chr23:34990105-34991293	chr23:34990105-34991293	TSS	0.149	CHST13	MA1136.1	chr23:34990480-34990489	-0.345334	0.411311	0.982521	junba	0.0510403	junba->CHST13	1.29027	0.0514545	0	0	1.93563	0.126393	0	0.73169	Superficial_Epithelial_0dpa
CHST13#chr23:34990105-34991293	chr23:34990105-34991293	TSS	0.149	CHST13	MA0624.2	chr23:34990584-34990595	-0.353472	0.621577	0.478754	nfatc1	0.0822448	nfatc1->CHST13	2.34259	0.0913912	0	0	0.0105534	0.126393	0	0.73169	Superficial_Epithelial_0dpa
ciartb#chr25:26672262-26673811	chr25:26672262-26673811	TSS	0	ciartb	MA1133.1	chr25:26672849-26672860	0.109378	0.539549	0.997106	jun	0.05518	jun->ciartb	1.38808	0.0764164	0	0	2.12638	0.468003	0	1.92537	Superficial_Epithelial_0dpa
ciartb#chr25:26672262-26673811	chr25:26672262-26673811	TSS	0	ciartb	MA1951.1	chr25:26672848-26672861	0.18986	0.54044	0.710936	fosab	0.154414	fosab->ciartb	12.2835	0.124224	0	0	2.65236	0.468003	0	1.92537	Superficial_Epithelial_0dpa
cicb#chr16:11150527-11152482	chr16:11150527-11152482	Body	0.072	cicb	MA1127.1	chr16:11150957-11150967	-0.212603	2.09096	-0.227804	fosb	0.150449	fosb->cicb	1.20656	0.0759093	0	0	2.01852	0.210121	0	1.90063	Superficial_Epithelial_0dpa
cicb#chr16:11150527-11152482	chr16:11150527-11152482	Body	0.072	cicb	MA1127.1	chr16:11151027-11151037	-3.06719	4.50122	3.36598	fosb	0.150449	fosb->cicb	1.20656	0.0759093	0	0	2.01852	0.210121	0	1.90063	Superficial_Epithelial_0dpa
cicb#chr16:11150527-11152482	chr16:11150527-11152482	Body	0.072	cicb	MA1127.1	chr16:11150958-11150968	-0.417452	2.58908	0.115372	fosb	0.150449	fosb->cicb	1.20656	0.0759093	0	0	2.01852	0.210121	0	1.90063	Superficial_Epithelial_0dpa
cicb#chr16:11150527-11152482	chr16:11150527-11152482	Body	0.072	cicb	MA1127.1	chr16:11151028-11151038	-3.03115	4.57549	3.32011	fosb	0.150449	fosb->cicb	1.20656	0.0759093	0	0	2.01852	0.210121	0	1.90063	Superficial_Epithelial_0dpa
cicb#chr16:11150527-11152482	chr16:11150527-11152482	Body	0.072	cicb	MA1136.1	chr16:11151028-11151037	-3.36671	4.97583	3.07878	fosb	0.133295	fosb->cicb	1.20656	0.0759093	0	0	2.01852	0.210121	0	1.90063	Superficial_Epithelial_0dpa
cicb#chr16:11150527-11152482	chr16:11150527-11152482	Body	0.072	cicb	MA1136.1	chr16:11150958-11150967	-0.277642	2.66644	-0.307644	fosb	0.133295	fosb->cicb	1.20656	0.0759093	0	0	2.01852	0.210121	0	1.90063	Superficial_Epithelial_0dpa
cicb#chr16:11150527-11152482	chr16:11150527-11152482	Body	0.072	cicb	MA1136.1	chr16:11151028-11151037	-3.36671	4.97583	3.07878	fosb	0.133295	fosb->cicb	1.20656	0.0759093	0	0	2.01852	0.210121	0	1.90063	Superficial_Epithelial_0dpa
cicb#chr16:11150527-11152482	chr16:11150527-11152482	Body	0.072	cicb	MA1470.1	chr16:11151023-11151042	-3.42612	4.08503	4.49635	bach2b	0.193379	bach2b->cicb	9.09759	0.142506	0	0	0.209666	0.210121	0	1.90063	Superficial_Epithelial_0dpa
cicb#chr16:11150527-11152482	chr16:11150527-11152482	TSS	0.072	cicb	MA1127.1	chr16:11150957-11150967	-0.212603	2.09096	-0.227804	fosb	0.150449	fosb->cicb	1.20656	0.0759093	0	0	2.01852	0.210121	0	1.90063	Superficial_Epithelial_0dpa
cicb#chr16:11150527-11152482	chr16:11150527-11152482	TSS	0.072	cicb	MA1127.1	chr16:11151027-11151037	-3.06719	4.50122	3.36598	fosb	0.150449	fosb->cicb	1.20656	0.0759093	0	0	2.01852	0.210121	0	1.90063	Superficial_Epithelial_0dpa
cicb#chr16:11150527-11152482	chr16:11150527-11152482	TSS	0.072	cicb	MA1127.1	chr16:11150958-11150968	-0.417452	2.58908	0.115372	fosb	0.150449	fosb->cicb	1.20656	0.0759093	0	0	2.01852	0.210121	0	1.90063	Superficial_Epithelial_0dpa
cicb#chr16:11150527-11152482	chr16:11150527-11152482	TSS	0.072	cicb	MA1127.1	chr16:11151028-11151038	-3.03115	4.57549	3.32011	fosb	0.150449	fosb->cicb	1.20656	0.0759093	0	0	2.01852	0.210121	0	1.90063	Superficial_Epithelial_0dpa
cicb#chr16:11150527-11152482	chr16:11150527-11152482	TSS	0.072	cicb	MA1136.1	chr16:11151028-11151037	-3.36671	4.97583	3.07878	fosb	0.133295	fosb->cicb	1.20656	0.0759093	0	0	2.01852	0.210121	0	1.90063	Superficial_Epithelial_0dpa
cicb#chr16:11150527-11152482	chr16:11150527-11152482	TSS	0.072	cicb	MA1136.1	chr16:11150958-11150967	-0.277642	2.66644	-0.307644	fosb	0.133295	fosb->cicb	1.20656	0.0759093	0	0	2.01852	0.210121	0	1.90063	Superficial_Epithelial_0dpa
cicb#chr16:11150527-11152482	chr16:11150527-11152482	TSS	0.072	cicb	MA1136.1	chr16:11151028-11151037	-3.36671	4.97583	3.07878	fosb	0.133295	fosb->cicb	1.20656	0.0759093	0	0	2.01852	0.210121	0	1.90063	Superficial_Epithelial_0dpa
cicb#chr16:11150527-11152482	chr16:11150527-11152482	TSS	0.072	cicb	MA1470.1	chr16:11151023-11151042	-3.42612	4.08503	4.49635	bach2b	0.193379	bach2b->cicb	9.09759	0.142506	0	0	0.209666	0.210121	0	1.90063	Superficial_Epithelial_0dpa
cirbpb#chr22:18545353-18546554	chr22:18545353-18546554	TSS	0	cirbpb	MA0772.1	chr22:18545666-18545679	0.287381	0.00751518	0.248114	irf7	0.0852944	irf7->cirbpb	1.06914	0.0468904	0	0	0.785997	1.16621	0	1.88158	Superficial_Epithelial_0dpa
clasp1a#chr9:38163485-38164917	chr9:38163485-38164917	TSS	0	clasp1a	MA0606.2	chr9:38163549-38163560	-0.0124388	0.216213	-0.0557594	nfat5b	0.0631327	nfat5b->clasp1a	1.60247	0.0609146	0	0	0.125666	0.573311	0	1.2387	Superficial_Epithelial_0dpa
clcf1#chr14:22021809-22022794	chr14:22021809-22022794	Body	0.093	clcf1	MA0511.2	chr14:22022329-22022337	-0.137719	0.200605	0.328575	runx2b	0.0696328	runx2b->clcf1	2.49412	0.0593544	0	0	0.579878	0.239433	0	1.28714	Superficial_Epithelial_0dpa
clcf1#chr14:22021809-22022794	chr14:22021809-22022794	Body	0.093	clcf1	MA0100.3	chr14:22021867-22021876	-0.20702	0.705816	0.328007	myb	0.0642334	myb->clcf1	3.57266	0.101308	0	0	0.170312	0.239433	0	1.28714	Superficial_Epithelial_0dpa
clcf1#chr14:22034557-22035575	chr14:22034557-22035575	Body	0.125	clcf1	MA1527.1	chr14:22034894-22034910	0.0904502	0.0803394	0.0642491	nfic	0.072754	nfic->clcf1	5.27219	0.0955517	0	0	0.510769	0.239433	0	3.036	Superficial_Epithelial_0dpa
clcf1#chr14:22034557-22035575	chr14:22034557-22035575	Body	0.125	clcf1	MA0742.2	chr14:22034806-22034814	-0.0810845	0.0515358	0.0810933	klf12b	0.0830955	klf12b->clcf1	1.10909	0.107205	0	0	0.00592045	0.239433	0	3.036	Superficial_Epithelial_0dpa
clcf1#chr14:22034557-22035575	chr14:22034557-22035575	Body	0.125	clcf1	MA0742.2	chr14:22035149-22035157	-0.0387994	-0.00415014	0.588376	klf12b	0.0830955	klf12b->clcf1	1.10909	0.107205	0	0	0.00592045	0.239433	0	3.036	Superficial_Epithelial_0dpa
clcf1#chr14:22040717-22042380	chr14:22040717-22042380	Inter	0.134	clcf1	MA0522.3	chr14:22041543-22041553	0.0948018	-0.265454	0.777882	tcf3a	0.0820155	tcf3a->clcf1	6.70651	0.11846	0	0	0.450357	0.239433	0	1.93961	Superficial_Epithelial_0dpa
clcf1#chr14:22021809-22022794	chr14:22021809-22022794	TSS	0.093	clcf1	MA0511.2	chr14:22022329-22022337	-0.137719	0.200605	0.328575	runx2b	0.0696328	runx2b->clcf1	2.49412	0.0593544	0	0	0.579878	0.239433	0	1.28714	Superficial_Epithelial_0dpa
clcf1#chr14:22021809-22022794	chr14:22021809-22022794	TSS	0.093	clcf1	MA0100.3	chr14:22021867-22021876	-0.20702	0.705816	0.328007	myb	0.0642334	myb->clcf1	3.57266	0.101308	0	0	0.170312	0.239433	0	1.28714	Superficial_Epithelial_0dpa
clcn5b#chr7:22853561-22854960	chr7:22853561-22854960	TSS	0	clcn5b	MA0073.1	chr7:22854383-22854402	-0.089574	0.101238	0.100938	rreb1a	0.0500665	rreb1a->clcn5b	3.21277	0.0439821	0	0	0.266798	0.207594	0	1.21471	Superficial_Epithelial_0dpa
clcn5b#chr7:22853561-22854960	chr7:22853561-22854960	TSS	0	clcn5b	MA0073.1	chr7:22854385-22854404	-0.0791754	0.0907671	0.0954602	rreb1a	0.0500665	rreb1a->clcn5b	3.21277	0.0439821	0	0	0.266798	0.207594	0	1.21471	Superficial_Epithelial_0dpa
clcn5b#chr7:22853561-22854960	chr7:22853561-22854960	TSS	0	clcn5b	MA0073.1	chr7:22854388-22854407	-0.0767601	0.079411	0.172855	rreb1a	0.0500665	rreb1a->clcn5b	3.21277	0.0439821	0	0	0.266798	0.207594	0	1.21471	Superficial_Epithelial_0dpa
cldn7b#chr10:22147841-22150837	chr10:22147841-22150837	TSS	0	cldn7b	MA1509.1	chr10:22150407-22150415	0.714624	1.65914	-1.1393	irf6	0.0899394	irf6->cldn7b	13.9472	0.12962	0	0	0.476886	2.6333	0	1.98291	Superficial_Epithelial_0dpa
cldn7b#chr10:22151100-22151443	chr10:22151100-22151443	TSS	0	cldn7b	MA1126.1	chr10:22151384-22151399	-0.0537701	0.278953	0.16824	fosab	0.10646	fosab->cldn7b	7.55261	0.0741727	0	0	2.65236	2.6333	0	2.55585	Superficial_Epithelial_0dpa
cldna#chr15:2656857-2657909	chr15:2656857-2657909	Body	0.27	cldna	MA1101.2	chr15:2657677-2657695	-0.0553492	0.128608	0.0550378	bach2b	0.0657534	bach2b->cldna	70.4546	0.337933	0	0	0.209666	0.909883	0	0.563233	Superficial_Epithelial_0dpa
cldna#chr15:2656857-2657909	chr15:2656857-2657909	Body	0.27	cldna	MA1101.2	chr15:2657677-2657695	-0.0553492	0.128608	0.0550378	bach2b	0.0657534	bach2b->cldna	70.4546	0.337933	0	0	0.209666	0.909883	0	0.563233	Superficial_Epithelial_0dpa
cldna#chr15:2656857-2657909	chr15:2656857-2657909	Body	0.27	cldna	MA0522.3	chr15:2657465-2657475	-0.0217439	0.110988	-0.00274545	tcf3a	0.0820155	tcf3a->cldna	7.71008	0.153786	0	0	0.450357	0.909883	0	0.563233	Superficial_Epithelial_0dpa
cldna#chr15:2656857-2657909	chr15:2656857-2657909	TSS	0.27	cldna	MA1101.2	chr15:2657677-2657695	-0.0553492	0.128608	0.0550378	bach2b	0.0657534	bach2b->cldna	70.4546	0.337933	0	0	0.209666	0.909883	0	0.563233	Superficial_Epithelial_0dpa
cldna#chr15:2656857-2657909	chr15:2656857-2657909	TSS	0.27	cldna	MA1101.2	chr15:2657677-2657695	-0.0553492	0.128608	0.0550378	bach2b	0.0657534	bach2b->cldna	70.4546	0.337933	0	0	0.209666	0.909883	0	0.563233	Superficial_Epithelial_0dpa
cldna#chr15:2656857-2657909	chr15:2656857-2657909	TSS	0.27	cldna	MA0522.3	chr15:2657465-2657475	-0.0217439	0.110988	-0.00274545	tcf3a	0.0820155	tcf3a->cldna	7.71008	0.153786	0	0	0.450357	0.909883	0	0.563233	Superficial_Epithelial_0dpa
cldnb#chr21:25763848-25767683	chr21:25763848-25767683	Body	0.081	cldnb	MA1128.1	chr21:25765590-25765602	0.376613	0.710979	-0.130516	fosl1a	0.122265	fosl1a->cldnb	33.0717	0.183676	0	0	2.74651	3.56203	0	2.40672	Superficial_Epithelial_0dpa
cldnb#chr21:25763848-25767683	chr21:25763848-25767683	Body	0.081	cldnb	MA1137.1	chr21:25765590-25765602	0.376613	0.710979	-0.130516	fosl1a	0.123797	fosl1a->cldnb	33.0717	0.183676	0	0	2.74651	3.56203	0	2.40672	Superficial_Epithelial_0dpa
cldnb#chr21:25763848-25767683	chr21:25763848-25767683	Body	0.081	cldnb	MA1142.1	chr21:25765591-25765600	0.301439	0.263067	0.00249706	fosl1a	0.132058	fosl1a->cldnb	33.0717	0.183676	0	0	2.74651	3.56203	0	2.40672	Superficial_Epithelial_0dpa
cldnb#chr21:25763848-25767683	chr21:25763848-25767683	Body	0.081	cldnb	MA0477.2	chr21:25765590-25765602	0.376613	0.710979	-0.130516	fosl1a	0.126437	fosl1a->cldnb	33.0717	0.183676	0	0	2.74651	3.56203	0	2.40672	Superficial_Epithelial_0dpa
cldnb#chr21:25738374-25739513	chr21:25738374-25739513	Inter	0.058	cldnb	MA1128.1	chr21:25738931-25738943	-0.0215377	0.192963	0.159168	fosl1a	0.122265	fosl1a->cldnb	33.0717	0.183676	0	0	2.74651	3.56203	0	0.735659	Superficial_Epithelial_0dpa
cldnb#chr21:25738374-25739513	chr21:25738374-25739513	Inter	0.058	cldnb	MA1137.1	chr21:25738931-25738943	-0.0215377	0.192963	0.159168	fosl1a	0.123797	fosl1a->cldnb	33.0717	0.183676	0	0	2.74651	3.56203	0	0.735659	Superficial_Epithelial_0dpa
cldnb#chr21:25738374-25739513	chr21:25738374-25739513	Inter	0.058	cldnb	MA1142.1	chr21:25738933-25738942	-0.0155728	0.23702	0.225326	fosl1a	0.132058	fosl1a->cldnb	33.0717	0.183676	0	0	2.74651	3.56203	0	0.735659	Superficial_Epithelial_0dpa
cldnb#chr21:25738374-25739513	chr21:25738374-25739513	Inter	0.058	cldnb	MA0477.2	chr21:25738931-25738943	-0.0215377	0.192963	0.159168	fosl1a	0.126437	fosl1a->cldnb	33.0717	0.183676	0	0	2.74651	3.56203	0	0.735659	Superficial_Epithelial_0dpa
cldnb#chr21:25738374-25739513	chr21:25738374-25739513	Inter	0.058	cldnb	MA0477.2	chr21:25738931-25738943	-0.0215377	0.192963	0.159168	fosl1a	0.126437	fosl1a->cldnb	33.0717	0.183676	0	0	2.74651	3.56203	0	0.735659	Superficial_Epithelial_0dpa
cldnb#chr21:25763848-25767683	chr21:25763848-25767683	TSS	0.081	cldnb	MA1128.1	chr21:25765590-25765602	0.376613	0.710979	-0.130516	fosl1a	0.122265	fosl1a->cldnb	33.0717	0.183676	0	0	2.74651	3.56203	0	2.40672	Superficial_Epithelial_0dpa
cldnb#chr21:25763848-25767683	chr21:25763848-25767683	TSS	0.081	cldnb	MA1137.1	chr21:25765590-25765602	0.376613	0.710979	-0.130516	fosl1a	0.123797	fosl1a->cldnb	33.0717	0.183676	0	0	2.74651	3.56203	0	2.40672	Superficial_Epithelial_0dpa
cldnb#chr21:25763848-25767683	chr21:25763848-25767683	TSS	0.081	cldnb	MA1142.1	chr21:25765591-25765600	0.301439	0.263067	0.00249706	fosl1a	0.132058	fosl1a->cldnb	33.0717	0.183676	0	0	2.74651	3.56203	0	2.40672	Superficial_Epithelial_0dpa
cldnb#chr21:25763848-25767683	chr21:25763848-25767683	TSS	0.081	cldnb	MA0477.2	chr21:25765590-25765602	0.376613	0.710979	-0.130516	fosl1a	0.126437	fosl1a->cldnb	33.0717	0.183676	0	0	2.74651	3.56203	0	2.40672	Superficial_Epithelial_0dpa
clic1#chr19:18757873-18760090	chr19:18757873-18760090	TSS	0	clic1	MA1963.1	chr19:18757934-18757946	-0.00556491	-0.0210785	0.254838	satb1b	0.0529479	satb1b->clic1	1.6157	0.0793996	0	0	0.041543	0.102709	0	1.75135	Superficial_Epithelial_0dpa
clint1a#chr14:35369753-35370787	chr14:35369753-35370787	TSS	0	clint1a	MA1136.1	chr14:35369901-35369910	-0.255602	0.0756302	1.17488	junba	0.0510403	junba->clint1a	1.52775	0.0434025	0	0	1.93563	1.07706	0	1.41185	Superficial_Epithelial_0dpa
clpxa#chr7:13639169-13640390	chr7:13639169-13640390	TSS	0	clpxa	MA0089.2	chr7:13639607-13639622	-0.34567	0.635658	0.363891	nfe2l1a	0.0627577	nfe2l1a->clpxa	1.07467	0.0436033	0	0	1.05576	0.398935	0	1.36176	Superficial_Epithelial_0dpa
cltca#chr10:28367967-28369613	chr10:28367967-28369613	Body	0.061	cltca	MA1933.1	chr10:28369208-28369223	-0.112531	0.525779	0.267259	elk1	0.0811215	elk1->cltca	1.87118	0.0624284	0	0	0.111184	1.37969	0	1.44023	Superficial_Epithelial_0dpa
cltca#chr10:28367967-28369613	chr10:28367967-28369613	TSS	0.061	cltca	MA1933.1	chr10:28369208-28369223	-0.112531	0.525779	0.267259	elk1	0.0811215	elk1->cltca	1.87118	0.0624284	0	0	0.111184	1.37969	0	1.44023	Superficial_Epithelial_0dpa
cmpk#chr2:10063320-10064456	chr2:10063320-10064456	TSS	0	cmpk	MA0640.2	chr2:10064392-10064405	0.032526	0.0217751	0.287386	elf3	0.0502292	elf3->cmpk	1.1445	0.0462289	0	0	1.46398	0.602959	0	1.89977	Superficial_Epithelial_0dpa
cmtm6#chr16:41487087-41488326	chr16:41487087-41488326	TSS	0	cmtm6	MA0517.1	chr16:41488190-41488204	-0.0308722	0.0822515	0.0405572	stat1b	0.151583	stat1b->cmtm6	2.93968	0.0606316	0	0	0.572188	0.530027	0	1.3319	Superficial_Epithelial_0dpa
cmtm6#chr16:41487087-41488326	chr16:41487087-41488326	TSS	0	cmtm6	MA0517.1	chr16:41487716-41487730	0.0100067	0.0525424	0.230398	stat1b	0.151583	stat1b->cmtm6	2.93968	0.0606316	0	0	0.572188	0.530027	0	1.3319	Superficial_Epithelial_0dpa
cmtm6#chr16:41487087-41488326	chr16:41487087-41488326	TSS	0	cmtm6	MA0772.1	chr16:41487721-41487734	0.109685	-0.0230841	0.123117	irf7	0.0852944	irf7->cmtm6	2.82277	0.0326662	0	0	0.785997	0.530027	0	1.3319	Superficial_Epithelial_0dpa
cnih1#chr13:36595363-36596469	chr13:36595363-36596469	TSS	0	cnih1	MA1099.2	chr13:36595608-36595617	-1.01156	1.05863	1.57112	her6	0.0672081	her6->cnih1	2.77565	0.077179	0	0	0.024186	0.109727	0	1.41425	Superficial_Epithelial_0dpa
cnih1#chr13:36595363-36596469	chr13:36595363-36596469	TSS	0	cnih1	MA1099.2	chr13:36595816-36595825	-0.127505	0.00818725	0.372469	her6	0.0672081	her6->cnih1	2.77565	0.077179	0	0	0.024186	0.109727	0	1.41425	Superficial_Epithelial_0dpa
cnih1#chr13:36595363-36596469	chr13:36595363-36596469	TSS	0	cnih1	MA1099.2	chr13:36595608-36595617	-1.01156	1.05863	1.57112	her6	0.0672081	her6->cnih1	2.77565	0.077179	0	0	0.024186	0.109727	0	1.41425	Superficial_Epithelial_0dpa
cnksr3#chr20:3911295-3912055	chr20:3911295-3912055	TSS	0	cnksr3	MA1509.1	chr20:3911549-3911557	0.342071	0.0479291	0.487957	irf6	0.0899394	irf6->cnksr3	8.8628	0.086229	0	0	0.476886	1.23845	0	1.67164	Superficial_Epithelial_0dpa
cnn2#chr2:24552599-24554961	chr2:24552599-24554961	TSS	0	cnn2	MA0478.1	chr2:24554593-24554603	-0.231809	1.04406	0.758695	fosl2	0.0934041	fosl2->cnn2	3.07439	0.0740864	0	0	1.62846	1.31388	0	2.5016	Superficial_Epithelial_0dpa
cnn2#chr2:24552599-24554961	chr2:24552599-24554961	TSS	0	cnn2	MA0478.1	chr2:24554595-24554605	-0.420565	1.32919	0.876527	fosl2	0.0934041	fosl2->cnn2	3.07439	0.0740864	0	0	1.62846	1.31388	0	2.5016	Superficial_Epithelial_0dpa
cnn2#chr2:24552599-24554961	chr2:24552599-24554961	TSS	0	cnn2	MA1128.1	chr2:24554593-24554605	-0.153311	1.39562	0.558177	fosl1a	0.122265	fosl1a->cnn2	1.74434	0.0387439	0	0	2.74651	1.31388	0	2.5016	Superficial_Epithelial_0dpa
cnn2#chr2:24552599-24554961	chr2:24552599-24554961	TSS	0	cnn2	MA1130.1	chr2:24554593-24554604	-0.212491	0.927237	0.623073	fosl2	0.0837069	fosl2->cnn2	3.07439	0.0740864	0	0	1.62846	1.31388	0	2.5016	Superficial_Epithelial_0dpa
cnn2#chr2:24552599-24554961	chr2:24552599-24554961	TSS	0	cnn2	MA1131.1	chr2:24554629-24554639	-0.203962	0.561096	0.8455	fosl2	0.0630162	fosl2->cnn2	3.07439	0.0740864	0	0	1.62846	1.31388	0	2.5016	Superficial_Epithelial_0dpa
cnn2#chr2:24552599-24554961	chr2:24552599-24554961	TSS	0	cnn2	MA1137.1	chr2:24554593-24554605	-0.153311	1.39562	0.558177	fosl1a	0.123797	fosl1a->cnn2	1.74434	0.0387439	0	0	2.74651	1.31388	0	2.5016	Superficial_Epithelial_0dpa
cnn2#chr2:24552599-24554961	chr2:24552599-24554961	TSS	0	cnn2	MA1138.1	chr2:24554595-24554604	-0.518308	1.23875	1.07033	fosl2	0.084033	fosl2->cnn2	3.07439	0.0740864	0	0	1.62846	1.31388	0	2.5016	Superficial_Epithelial_0dpa
cnn2#chr2:24552599-24554961	chr2:24552599-24554961	TSS	0	cnn2	MA1142.1	chr2:24554595-24554604	-0.518308	1.23875	1.07033	fosl1a	0.132058	fosl1a->cnn2	1.74434	0.0387439	0	0	2.74651	1.31388	0	2.5016	Superficial_Epithelial_0dpa
cnn2#chr2:24552599-24554961	chr2:24552599-24554961	TSS	0	cnn2	MA1144.1	chr2:24554595-24554604	-0.518308	1.23875	1.07033	fosl2	0.0824373	fosl2->cnn2	3.07439	0.0740864	0	0	1.62846	1.31388	0	2.5016	Superficial_Epithelial_0dpa
cnn2#chr2:24552599-24554961	chr2:24552599-24554961	TSS	0	cnn2	MA0746.2	chr2:24554459-24554471	-0.00444605	0.637499	0.526908	sp3b	0.0712338	sp3b->cnn2	2.68073	0.063523	0	0	0.0996294	1.31388	0	2.5016	Superficial_Epithelial_0dpa
cnn2#chr2:24552599-24554961	chr2:24552599-24554961	TSS	0	cnn2	MA0477.2	chr2:24554593-24554605	-0.153311	1.39562	0.558177	fosl1a	0.126437	fosl1a->cnn2	1.74434	0.0387439	0	0	2.74651	1.31388	0	2.5016	Superficial_Epithelial_0dpa
cnn2#chr2:24552599-24554961	chr2:24552599-24554961	TSS	0	cnn2	MA1633.2	chr2:24554595-24554603	-0.575897	1.38602	1.2591	bach1b	0.0601907	bach1b->cnn2	2.43303	0.081695	0	0	0.925602	1.31388	0	2.5016	Superficial_Epithelial_0dpa
cnn3a#chr24:31192983-31195167	chr24:31192983-31195167	Body	0.051	cnn3a	MA0840.1	chr24:31193813-31193824	-0.201629	0.49782	0.680709	creb5b	0.128114	creb5b->cnn3a	7.1784	0.0919711	0	0	0.361049	0.872854	0	1.86826	Superficial_Epithelial_0dpa
cnn3a#chr24:31192983-31195167	chr24:31192983-31195167	Body	0.051	cnn3a	MA0840.1	chr24:31193813-31193824	-0.201629	0.49782	0.680709	creb5b	0.128114	creb5b->cnn3a	7.1784	0.0919711	0	0	0.361049	0.872854	0	1.86826	Superficial_Epithelial_0dpa
cnn3a#chr24:31192983-31195167	chr24:31192983-31195167	Body	0.051	cnn3a	MA1131.1	chr24:31193813-31193823	-0.219959	0.57485	0.766913	fosl2	0.0630162	fosl2->cnn3a	1.72219	0.051881	0	0	1.62846	0.872854	0	1.86826	Superficial_Epithelial_0dpa
cnn3a#chr24:31192983-31195167	chr24:31192983-31195167	Body	0.051	cnn3a	MA1131.1	chr24:31193814-31193824	-0.219959	0.538709	0.796427	fosl2	0.0630162	fosl2->cnn3a	1.72219	0.051881	0	0	1.62846	0.872854	0	1.86826	Superficial_Epithelial_0dpa
cnn3a#chr24:31192983-31195167	chr24:31192983-31195167	Body	0.051	cnn3a	MA1139.1	chr24:31193813-31193824	-0.201629	0.49782	0.680709	fosl2	0.0569617	fosl2->cnn3a	1.72219	0.051881	0	0	1.62846	0.872854	0	1.86826	Superficial_Epithelial_0dpa
cnn3a#chr24:31192983-31195167	chr24:31192983-31195167	Body	0.051	cnn3a	MA1139.1	chr24:31193813-31193824	-0.201629	0.49782	0.680709	fosl2	0.0569617	fosl2->cnn3a	1.72219	0.051881	0	0	1.62846	0.872854	0	1.86826	Superficial_Epithelial_0dpa
cnn3a#chr24:31192983-31195167	chr24:31192983-31195167	TSS	0.051	cnn3a	MA0840.1	chr24:31193813-31193824	-0.201629	0.49782	0.680709	creb5b	0.128114	creb5b->cnn3a	7.1784	0.0919711	0	0	0.361049	0.872854	0	1.86826	Superficial_Epithelial_0dpa
cnn3a#chr24:31192983-31195167	chr24:31192983-31195167	TSS	0.051	cnn3a	MA0840.1	chr24:31193813-31193824	-0.201629	0.49782	0.680709	creb5b	0.128114	creb5b->cnn3a	7.1784	0.0919711	0	0	0.361049	0.872854	0	1.86826	Superficial_Epithelial_0dpa
cnn3a#chr24:31192983-31195167	chr24:31192983-31195167	TSS	0.051	cnn3a	MA1131.1	chr24:31193813-31193823	-0.219959	0.57485	0.766913	fosl2	0.0630162	fosl2->cnn3a	1.72219	0.051881	0	0	1.62846	0.872854	0	1.86826	Superficial_Epithelial_0dpa
cnn3a#chr24:31192983-31195167	chr24:31192983-31195167	TSS	0.051	cnn3a	MA1131.1	chr24:31193814-31193824	-0.219959	0.538709	0.796427	fosl2	0.0630162	fosl2->cnn3a	1.72219	0.051881	0	0	1.62846	0.872854	0	1.86826	Superficial_Epithelial_0dpa
cnn3a#chr24:31192983-31195167	chr24:31192983-31195167	TSS	0.051	cnn3a	MA1139.1	chr24:31193813-31193824	-0.201629	0.49782	0.680709	fosl2	0.0569617	fosl2->cnn3a	1.72219	0.051881	0	0	1.62846	0.872854	0	1.86826	Superficial_Epithelial_0dpa
cnn3a#chr24:31192983-31195167	chr24:31192983-31195167	TSS	0.051	cnn3a	MA1139.1	chr24:31193813-31193824	-0.201629	0.49782	0.680709	fosl2	0.0569617	fosl2->cnn3a	1.72219	0.051881	0	0	1.62846	0.872854	0	1.86826	Superficial_Epithelial_0dpa
cnot10#chr16:7703031-7704508	chr16:7703031-7704508	TSS	0	cnot10	MA0481.3	chr16:7704011-7704021	-0.0437018	0.20796	-0.0168834	foxp1b	0.0976319	foxp1b->cnot10	1.21319	0.0576622	0	0	0.0287816	0.0449174	0	0.81205	Superficial_Epithelial_0dpa
cobll1b#chr9:50107448-50108423	chr9:50107448-50108423	Body	0.057	cobll1b	MA0144.2	chr9:50107815-50107825	-0.0166483	0.08194	0.108171	stat3	0.0671814	stat3->cobll1b	11.4118	0.0992143	0	0	0.981733	1.01653	0	0.849702	Superficial_Epithelial_0dpa
cobll1b#chr9:50038072-50039198	chr9:50038072-50039198	TSS	0	cobll1b	MA1527.1	chr9:50038196-50038212	-0.00102093	-0.0367828	0.183842	nfic	0.072754	nfic->cobll1b	13.7293	0.123251	0	0	0.510769	1.01653	0	1.25558	Superficial_Epithelial_0dpa
cobll1b#chr9:50110238-50111195	chr9:50110238-50111195	TSS	0	cobll1b	MA0073.1	chr9:50110517-50110536	-0.0747581	0.146705	-0.0387716	rreb1a	0.0500665	rreb1a->cobll1b	1.73518	0.0633615	0	0	0.266798	1.01653	0	2.4445	Superficial_Epithelial_0dpa
cobll1b#chr9:50110238-50111195	chr9:50110238-50111195	TSS	0	cobll1b	MA0073.1	chr9:50110519-50110538	-0.0894596	0.16803	0.00784242	rreb1a	0.0500665	rreb1a->cobll1b	1.73518	0.0633615	0	0	0.266798	1.01653	0	2.4445	Superficial_Epithelial_0dpa
cobll1b#chr9:50110238-50111195	chr9:50110238-50111195	TSS	0	cobll1b	MA0073.1	chr9:50110521-50110540	-0.0817647	0.159659	-0.00237614	rreb1a	0.0500665	rreb1a->cobll1b	1.73518	0.0633615	0	0	0.266798	1.01653	0	2.4445	Superficial_Epithelial_0dpa
cobll1b#chr9:50110238-50111195	chr9:50110238-50111195	TSS	0	cobll1b	MA0073.1	chr9:50110523-50110542	-0.0744297	0.144434	0.000720517	rreb1a	0.0500665	rreb1a->cobll1b	1.73518	0.0633615	0	0	0.266798	1.01653	0	2.4445	Superficial_Epithelial_0dpa
cobll1b#chr9:50110238-50111195	chr9:50110238-50111195	TSS	0	cobll1b	MA0073.1	chr9:50110525-50110544	-0.0824007	0.146052	0.0186044	rreb1a	0.0500665	rreb1a->cobll1b	1.73518	0.0633615	0	0	0.266798	1.01653	0	2.4445	Superficial_Epithelial_0dpa
cobll1b#chr9:50110238-50111195	chr9:50110238-50111195	TSS	0	cobll1b	MA0073.1	chr9:50110527-50110546	-0.10719	0.162397	0.0338849	rreb1a	0.0500665	rreb1a->cobll1b	1.73518	0.0633615	0	0	0.266798	1.01653	0	2.4445	Superficial_Epithelial_0dpa
cobll1b#chr9:50110238-50111195	chr9:50110238-50111195	TSS	0	cobll1b	MA0073.1	chr9:50110529-50110548	-0.111551	0.163966	0.0325651	rreb1a	0.0500665	rreb1a->cobll1b	1.73518	0.0633615	0	0	0.266798	1.01653	0	2.4445	Superficial_Epithelial_0dpa
cobll1b#chr9:50110238-50111195	chr9:50110238-50111195	TSS	0	cobll1b	MA0073.1	chr9:50110531-50110550	-0.119433	0.170117	0.039851	rreb1a	0.0500665	rreb1a->cobll1b	1.73518	0.0633615	0	0	0.266798	1.01653	0	2.4445	Superficial_Epithelial_0dpa
cobll1b#chr9:50110238-50111195	chr9:50110238-50111195	TSS	0	cobll1b	MA0073.1	chr9:50110533-50110552	-0.130053	0.17386	0.0623188	rreb1a	0.0500665	rreb1a->cobll1b	1.73518	0.0633615	0	0	0.266798	1.01653	0	2.4445	Superficial_Epithelial_0dpa
cobll1b#chr9:50110238-50111195	chr9:50110238-50111195	TSS	0	cobll1b	MA0073.1	chr9:50110535-50110554	-0.154095	0.188629	0.0871445	rreb1a	0.0500665	rreb1a->cobll1b	1.73518	0.0633615	0	0	0.266798	1.01653	0	2.4445	Superficial_Epithelial_0dpa
cobll1b#chr9:50110238-50111195	chr9:50110238-50111195	TSS	0	cobll1b	MA0073.1	chr9:50110537-50110556	-0.192099	0.220734	0.122574	rreb1a	0.0500665	rreb1a->cobll1b	1.73518	0.0633615	0	0	0.266798	1.01653	0	2.4445	Superficial_Epithelial_0dpa
cobll1b#chr9:50110238-50111195	chr9:50110238-50111195	TSS	0	cobll1b	MA0073.1	chr9:50110539-50110558	-0.217683	0.245898	0.142347	rreb1a	0.0500665	rreb1a->cobll1b	1.73518	0.0633615	0	0	0.266798	1.01653	0	2.4445	Superficial_Epithelial_0dpa
cobll1b#chr9:50110238-50111195	chr9:50110238-50111195	TSS	0	cobll1b	MA0073.1	chr9:50110541-50110560	-0.232644	0.232277	0.149405	rreb1a	0.0500665	rreb1a->cobll1b	1.73518	0.0633615	0	0	0.266798	1.01653	0	2.4445	Superficial_Epithelial_0dpa
cobll1b#chr9:50110238-50111195	chr9:50110238-50111195	TSS	0	cobll1b	MA0073.1	chr9:50110543-50110562	-0.247853	0.245832	0.238747	rreb1a	0.0500665	rreb1a->cobll1b	1.73518	0.0633615	0	0	0.266798	1.01653	0	2.4445	Superficial_Epithelial_0dpa
cobll1b#chr9:50110238-50111195	chr9:50110238-50111195	TSS	0	cobll1b	MA0073.1	chr9:50110545-50110564	-0.260336	0.227077	0.258162	rreb1a	0.0500665	rreb1a->cobll1b	1.73518	0.0633615	0	0	0.266798	1.01653	0	2.4445	Superficial_Epithelial_0dpa
cobll1b#chr9:50110238-50111195	chr9:50110238-50111195	TSS	0	cobll1b	MA0073.1	chr9:50110547-50110566	-0.268535	0.235589	0.255948	rreb1a	0.0500665	rreb1a->cobll1b	1.73518	0.0633615	0	0	0.266798	1.01653	0	2.4445	Superficial_Epithelial_0dpa
cobll1b#chr9:50110238-50111195	chr9:50110238-50111195	TSS	0	cobll1b	MA0073.1	chr9:50110549-50110568	-0.272463	0.238203	0.256902	rreb1a	0.0500665	rreb1a->cobll1b	1.73518	0.0633615	0	0	0.266798	1.01653	0	2.4445	Superficial_Epithelial_0dpa
cobll1b#chr9:50110238-50111195	chr9:50110238-50111195	TSS	0	cobll1b	MA0073.1	chr9:50110551-50110570	-0.264114	0.206637	0.262357	rreb1a	0.0500665	rreb1a->cobll1b	1.73518	0.0633615	0	0	0.266798	1.01653	0	2.4445	Superficial_Epithelial_0dpa
cobll1b#chr9:50110238-50111195	chr9:50110238-50111195	TSS	0	cobll1b	MA0073.1	chr9:50110553-50110572	-0.266743	0.208479	0.315505	rreb1a	0.0500665	rreb1a->cobll1b	1.73518	0.0633615	0	0	0.266798	1.01653	0	2.4445	Superficial_Epithelial_0dpa
cobll1b#chr9:50110238-50111195	chr9:50110238-50111195	TSS	0	cobll1b	MA0073.1	chr9:50110555-50110574	-0.274046	0.213781	0.321831	rreb1a	0.0500665	rreb1a->cobll1b	1.73518	0.0633615	0	0	0.266798	1.01653	0	2.4445	Superficial_Epithelial_0dpa
cobll1b#chr9:50110238-50111195	chr9:50110238-50111195	TSS	0	cobll1b	MA0073.1	chr9:50110557-50110576	-0.270431	0.207107	0.333555	rreb1a	0.0500665	rreb1a->cobll1b	1.73518	0.0633615	0	0	0.266798	1.01653	0	2.4445	Superficial_Epithelial_0dpa
cobll1b#chr9:50110238-50111195	chr9:50110238-50111195	TSS	0	cobll1b	MA0073.1	chr9:50110559-50110578	-0.231248	0.162335	0.401559	rreb1a	0.0500665	rreb1a->cobll1b	1.73518	0.0633615	0	0	0.266798	1.01653	0	2.4445	Superficial_Epithelial_0dpa
cobll1b#chr9:50110238-50111195	chr9:50110238-50111195	TSS	0	cobll1b	MA0073.1	chr9:50110561-50110580	-0.229003	0.157329	0.416934	rreb1a	0.0500665	rreb1a->cobll1b	1.73518	0.0633615	0	0	0.266798	1.01653	0	2.4445	Superficial_Epithelial_0dpa
cobll1b#chr9:50110238-50111195	chr9:50110238-50111195	TSS	0	cobll1b	MA0073.1	chr9:50110563-50110582	-0.229609	0.156505	0.431666	rreb1a	0.0500665	rreb1a->cobll1b	1.73518	0.0633615	0	0	0.266798	1.01653	0	2.4445	Superficial_Epithelial_0dpa
cobll1b#chr9:50110238-50111195	chr9:50110238-50111195	TSS	0	cobll1b	MA0073.1	chr9:50110565-50110584	-0.224125	0.145065	0.428001	rreb1a	0.0500665	rreb1a->cobll1b	1.73518	0.0633615	0	0	0.266798	1.01653	0	2.4445	Superficial_Epithelial_0dpa
cobll1b#chr9:50110238-50111195	chr9:50110238-50111195	TSS	0	cobll1b	MA0073.1	chr9:50110567-50110586	-0.231733	0.15178	0.442291	rreb1a	0.0500665	rreb1a->cobll1b	1.73518	0.0633615	0	0	0.266798	1.01653	0	2.4445	Superficial_Epithelial_0dpa
cobll1b#chr9:50110238-50111195	chr9:50110238-50111195	TSS	0	cobll1b	MA0073.1	chr9:50110569-50110588	-0.256154	0.160345	0.46382	rreb1a	0.0500665	rreb1a->cobll1b	1.73518	0.0633615	0	0	0.266798	1.01653	0	2.4445	Superficial_Epithelial_0dpa
cobll1b#chr9:50110238-50111195	chr9:50110238-50111195	TSS	0	cobll1b	MA0073.1	chr9:50110571-50110590	-0.262748	0.158513	0.456655	rreb1a	0.0500665	rreb1a->cobll1b	1.73518	0.0633615	0	0	0.266798	1.01653	0	2.4445	Superficial_Epithelial_0dpa
cobll1b#chr9:50110238-50111195	chr9:50110238-50111195	TSS	0	cobll1b	MA0073.1	chr9:50110573-50110592	-0.178959	0.0543552	0.338944	rreb1a	0.0500665	rreb1a->cobll1b	1.73518	0.0633615	0	0	0.266798	1.01653	0	2.4445	Superficial_Epithelial_0dpa
cobll1b#chr9:50110238-50111195	chr9:50110238-50111195	TSS	0	cobll1b	MA0073.1	chr9:50110647-50110666	-0.614	0.824558	1.27606	rreb1a	0.0500665	rreb1a->cobll1b	1.73518	0.0633615	0	0	0.266798	1.01653	0	2.4445	Superficial_Epithelial_0dpa
cobll1b#chr9:50110238-50111195	chr9:50110238-50111195	TSS	0	cobll1b	MA0073.1	chr9:50110649-50110668	-0.752568	0.960234	1.46694	rreb1a	0.0500665	rreb1a->cobll1b	1.73518	0.0633615	0	0	0.266798	1.01653	0	2.4445	Superficial_Epithelial_0dpa
cobll1b#chr9:50110238-50111195	chr9:50110238-50111195	TSS	0	cobll1b	MA0073.1	chr9:50110651-50110670	-0.7707	0.964608	1.49991	rreb1a	0.0500665	rreb1a->cobll1b	1.73518	0.0633615	0	0	0.266798	1.01653	0	2.4445	Superficial_Epithelial_0dpa
cobll1b#chr9:50110238-50111195	chr9:50110238-50111195	TSS	0	cobll1b	MA0073.1	chr9:50110653-50110672	-0.566142	0.726127	1.22956	rreb1a	0.0500665	rreb1a->cobll1b	1.73518	0.0633615	0	0	0.266798	1.01653	0	2.4445	Superficial_Epithelial_0dpa
cobll1b#chr9:50110238-50111195	chr9:50110238-50111195	TSS	0	cobll1b	MA0073.1	chr9:50110655-50110674	-0.54938	0.621727	1.32991	rreb1a	0.0500665	rreb1a->cobll1b	1.73518	0.0633615	0	0	0.266798	1.01653	0	2.4445	Superficial_Epithelial_0dpa
cobll1b#chr9:50110238-50111195	chr9:50110238-50111195	TSS	0	cobll1b	MA0073.1	chr9:50110657-50110676	-0.201431	0.219138	0.915686	rreb1a	0.0500665	rreb1a->cobll1b	1.73518	0.0633615	0	0	0.266798	1.01653	0	2.4445	Superficial_Epithelial_0dpa
cobll1b#chr9:50110238-50111195	chr9:50110238-50111195	TSS	0	cobll1b	MA1127.1	chr9:50110722-50110732	-0.202866	1.37006	1.86727	fosb	0.150449	fosb->cobll1b	7.1014	0.0993559	0	0	2.01852	1.01653	0	2.4445	Superficial_Epithelial_0dpa
cobll1b#chr9:50110238-50111195	chr9:50110238-50111195	TSS	0	cobll1b	MA1136.1	chr9:50110722-50110731	-0.0778434	1.44321	1.86467	fosb	0.133295	fosb->cobll1b	7.1014	0.0993559	0	0	2.01852	1.01653	0	2.4445	Superficial_Epithelial_0dpa
cobll1b#chr9:50110238-50111195	chr9:50110238-50111195	TSS	0	cobll1b	MA1136.1	chr9:50110722-50110731	-0.0778434	1.44321	1.86467	junba	0.0510403	junba->cobll1b	4.096	0.0648889	0	0	1.93563	1.01653	0	2.4445	Superficial_Epithelial_0dpa
cobll1b#chr9:50110238-50111195	chr9:50110238-50111195	TSS	0	cobll1b	MA1951.1	chr9:50110720-50110733	0.120215	0.84822	1.13153	fosab	0.154414	fosab->cobll1b	7.30617	0.111096	0	0	2.65236	1.01653	0	2.4445	Superficial_Epithelial_0dpa
cobll1b#chr9:50110238-50111195	chr9:50110238-50111195	TSS	0	cobll1b	MA1951.1	chr9:50110720-50110733	0.120215	0.84822	1.13153	fosab	0.154414	fosab->cobll1b	7.30617	0.111096	0	0	2.65236	1.01653	0	2.4445	Superficial_Epithelial_0dpa
cog4#chr7:29023970-29025023	chr7:29023970-29025023	TSS	0	cog4	MA0759.2	chr7:29024263-29024273	-0.438923	1.84544	0.476572	elk3	0.0686326	elk3->cog4	1.45648	0.0660578	0	0	0.322853	0.159293	0	1.58912	Superficial_Epithelial_0dpa
cog4#chr7:29023970-29025023	chr7:29023970-29025023	TSS	0	cog4	MA0759.2	chr7:29024613-29024623	0.0118886	0.189946	0.354056	elk3	0.0686326	elk3->cog4	1.45648	0.0660578	0	0	0.322853	0.159293	0	1.58912	Superficial_Epithelial_0dpa
col17a1b#chr13:24746971-24747601	chr13:24746971-24747601	Inter	0.213	col17a1b	MA1101.2	chr13:24747500-24747518	-0.039133	0.0403957	0.0622554	bach2b	0.0657534	bach2b->col17a1b	2.44748	0.0869198	0	0	0.209666	0.453054	0	0.20231	Superficial_Epithelial_0dpa
col17a1b#chr13:24746971-24747601	chr13:24746971-24747601	Inter	0.213	col17a1b	MA1101.2	chr13:24747500-24747518	-0.039133	0.0403957	0.0622554	bach2b	0.0657534	bach2b->col17a1b	2.44748	0.0869198	0	0	0.209666	0.453054	0	0.20231	Superficial_Epithelial_0dpa
col1a2#chr19:40982738-40984444	chr19:40982738-40984444	Body	0.137	col1a2	MA0624.2	chr19:40984186-40984197	0.0121455	-0.0455233	0.172376	nfatc1	0.0822448	nfatc1->col1a2	2.16068	0.0927093	0	0	0.0105534	0.124631	0	0.300995	Superficial_Epithelial_0dpa
col1a2#chr19:40982738-40984444	chr19:40982738-40984444	TSS	0.137	col1a2	MA0624.2	chr19:40984186-40984197	0.0121455	-0.0455233	0.172376	nfatc1	0.0822448	nfatc1->col1a2	2.16068	0.0927093	0	0	0.0105534	0.124631	0	0.300995	Superficial_Epithelial_0dpa
copb2#chr2:39014394-39015553	chr2:39014394-39015553	TSS	0	copb2	MA0511.2	chr2:39015407-39015415	-0.0377275	0.091622	0.0366386	runx2b	0.0696328	runx2b->copb2	1.95795	0.0621433	0	0	0.579878	0.694148	0	1.23185	Superficial_Epithelial_0dpa
coq10b#chr9:32178195-32179755	chr9:32178195-32179755	TSS	0	coq10b	MA1951.1	chr9:32179378-32179391	-0.0492344	0.0364987	0.103679	fosab	0.154414	fosab->coq10b	2.60878	0.0661393	0	0	2.65236	0.504535	0	1.65502	Superficial_Epithelial_0dpa
coro1ca#chr5:20319084-20320692	chr5:20319084-20320692	Body	0.052	coro1ca	MA0144.2	chr5:20319593-20319603	-0.258538	1.77742	-0.0688203	stat3	0.0671814	stat3->coro1ca	2.73149	0.0692937	0	0	0.981733	1.29731	0	2.49655	Superficial_Epithelial_0dpa
coro1ca#chr5:20319084-20320692	chr5:20319084-20320692	TSS	0.052	coro1ca	MA0144.2	chr5:20319593-20319603	-0.258538	1.77742	-0.0688203	stat3	0.0671814	stat3->coro1ca	2.73149	0.0692937	0	0	0.981733	1.29731	0	2.49655	Superficial_Epithelial_0dpa
coro2a#chr1:26627089-26627730	chr1:26627089-26627730	TSS	0	coro2a	MA0840.1	chr1:26627481-26627492	-0.184583	0.277939	0.258636	creb5b	0.128114	creb5b->coro2a	1.27579	0.0539995	0	0	0.361049	0.554393	0	1.18046	Superficial_Epithelial_0dpa
coro2a#chr1:26627089-26627730	chr1:26627089-26627730	TSS	0	coro2a	MA0840.1	chr1:26627481-26627492	-0.184583	0.277939	0.258636	creb5b	0.128114	creb5b->coro2a	1.27579	0.0539995	0	0	0.361049	0.554393	0	1.18046	Superficial_Epithelial_0dpa
coro2a#chr1:26627089-26627730	chr1:26627089-26627730	TSS	0	coro2a	MA1131.1	chr1:26627481-26627491	-0.201363	0.283146	0.294818	fosl2	0.0630162	fosl2->coro2a	1.45896	0.054484	0	0	1.62846	0.554393	0	1.18046	Superficial_Epithelial_0dpa
coro2a#chr1:26627089-26627730	chr1:26627089-26627730	TSS	0	coro2a	MA1139.1	chr1:26627481-26627492	-0.184583	0.277939	0.258636	fosl2	0.0569617	fosl2->coro2a	1.45896	0.054484	0	0	1.62846	0.554393	0	1.18046	Superficial_Epithelial_0dpa
coro2a#chr1:26627089-26627730	chr1:26627089-26627730	TSS	0	coro2a	MA1139.1	chr1:26627481-26627492	-0.184583	0.277939	0.258636	fosl2	0.0569617	fosl2->coro2a	1.45896	0.054484	0	0	1.62846	0.554393	0	1.18046	Superficial_Epithelial_0dpa
cpeb4b#chr21:41367947-41369729	chr21:41367947-41369729	TSS	0	cpeb4b	MA1130.1	chr21:41369540-41369551	0.0573433	0.678014	0.432566	fosl2	0.0837069	fosl2->cpeb4b	2.0971	0.0701824	0	0	1.62846	1.80114	0	1.83363	Superficial_Epithelial_0dpa
CR381618.1#chr25:30953935-30955577	chr25:30953935-30955577	Inter	0.074	CR381618.1	MA1527.1	chr25:30955088-30955104	-0.0198746	-0.0157448	0.147112	nfic	0.072754	nfic->CR381618.1	1.58073	0.0793912	0	0	0.510769	0.32749	0	2.29173	Superficial_Epithelial_0dpa
CR388148.2#chr4:58666938-58669542	chr4:58666938-58669542	TSS	0	CR388148.2	MA0517.1	chr4:58668529-58668543	-0.994528	2.51506	3.64691	stat1b	0.151583	stat1b->CR388148.2	2.67131	0.0549802	0	0	0.572188	0.279161	0	6.51754	Superficial_Epithelial_0dpa
CR388207.1#chr23:22590517-22591612	chr23:22590517-22591612	Inter	0.056	CR388207.1	MA0477.2	chr23:22591324-22591336	-0.131156	0.17946	0.422864	fosl1a	0.126437	fosl1a->CR388207.1	2.91724	0.0624107	0	0	2.74651	0.287304	0	2.37712	Superficial_Epithelial_0dpa
CR848749.1#chr15:37317480-37317729	chr15:37317480-37317729	Inter	0.063	CR848749.1	MA0772.1	chr15:37317662-37317675	-0.108696	0.161926	0.162073	irf7	0.0852944	irf7->CR848749.1	1.63974	0.0366155	0	0	0.785997	2.12147	0	3.8426	Superficial_Epithelial_0dpa
crb3a#chr3:49523535-49524225	chr3:49523535-49524225	Body	0.064	crb3a	MA0525.2	chr3:49524179-49524196	-0.0799314	0.251092	0.0781464	tp63	0.180472	tp63->crb3a	1.36227	0.0688758	0	0	0.439364	1.01998	0	2.18399	Superficial_Epithelial_0dpa
crb3a#chr3:49523535-49524225	chr3:49523535-49524225	Body	0.064	crb3a	MA0525.2	chr3:49524179-49524196	-0.0799314	0.251092	0.0781464	tp63	0.180472	tp63->crb3a	1.36227	0.0688758	0	0	0.439364	1.01998	0	2.18399	Superficial_Epithelial_0dpa
creb5a#chr19:19503564-19505156	chr19:19503564-19505156	TSS	0	creb5a	MA0840.1	chr19:19503809-19503820	-0.0827815	0.759002	0.470513	creb5b	0.128114	creb5b->creb5a	2.36827	0.0653069	0	0	0.361049	1.04711	0	2.03512	Superficial_Epithelial_0dpa
creb5a#chr19:19503564-19505156	chr19:19503564-19505156	TSS	0	creb5a	MA0840.1	chr19:19503900-19503911	-0.132103	0.907444	0.200096	creb5b	0.128114	creb5b->creb5a	2.36827	0.0653069	0	0	0.361049	1.04711	0	2.03512	Superficial_Epithelial_0dpa
creb5a#chr19:19503564-19505156	chr19:19503564-19505156	TSS	0	creb5a	MA0840.1	chr19:19504635-19504646	0.550903	1.15494	-0.0466428	creb5b	0.128114	creb5b->creb5a	2.36827	0.0653069	0	0	0.361049	1.04711	0	2.03512	Superficial_Epithelial_0dpa
creb5a#chr19:19503564-19505156	chr19:19503564-19505156	TSS	0	creb5a	MA0840.1	chr19:19503809-19503820	-0.0827815	0.759002	0.470513	creb5b	0.128114	creb5b->creb5a	2.36827	0.0653069	0	0	0.361049	1.04711	0	2.03512	Superficial_Epithelial_0dpa
creb5a#chr19:19503564-19505156	chr19:19503564-19505156	TSS	0	creb5a	MA0840.1	chr19:19503900-19503911	-0.132103	0.907444	0.200096	creb5b	0.128114	creb5b->creb5a	2.36827	0.0653069	0	0	0.361049	1.04711	0	2.03512	Superficial_Epithelial_0dpa
creb5a#chr19:19503564-19505156	chr19:19503564-19505156	TSS	0	creb5a	MA0840.1	chr19:19504635-19504646	0.550903	1.15494	-0.0466428	creb5b	0.128114	creb5b->creb5a	2.36827	0.0653069	0	0	0.361049	1.04711	0	2.03512	Superficial_Epithelial_0dpa
creb5a#chr19:19503564-19505156	chr19:19503564-19505156	TSS	0	creb5a	MA1126.1	chr19:19503809-19503824	-0.211742	0.770687	1.14475	fosab	0.10646	fosab->creb5a	4.47521	0.085861	0	0	2.65236	1.04711	0	2.03512	Superficial_Epithelial_0dpa
creb5a#chr19:19503564-19505156	chr19:19503564-19505156	TSS	0	creb5a	MA1126.1	chr19:19503805-19503820	0.0329547	0.504686	0.603535	fosab	0.10646	fosab->creb5a	4.47521	0.085861	0	0	2.65236	1.04711	0	2.03512	Superficial_Epithelial_0dpa
creb5a#chr19:19503564-19505156	chr19:19503564-19505156	TSS	0	creb5a	MA1126.1	chr19:19503896-19503911	-0.331436	1.16578	0.306437	fosab	0.10646	fosab->creb5a	4.47521	0.085861	0	0	2.65236	1.04711	0	2.03512	Superficial_Epithelial_0dpa
creb5a#chr19:19503564-19505156	chr19:19503564-19505156	TSS	0	creb5a	MA1129.1	chr19:19503810-19503819	-0.148933	0.696046	0.479591	jun	0.0526979	jun->creb5a	20.8894	0.132718	0	0	2.12638	1.04711	0	2.03512	Superficial_Epithelial_0dpa
creb5a#chr19:19503564-19505156	chr19:19503564-19505156	TSS	0	creb5a	MA1129.1	chr19:19503901-19503910	0.0840098	0.243924	-0.0053782	jun	0.0526979	jun->creb5a	20.8894	0.132718	0	0	2.12638	1.04711	0	2.03512	Superficial_Epithelial_0dpa
creb5a#chr19:19503564-19505156	chr19:19503564-19505156	TSS	0	creb5a	MA1129.1	chr19:19504636-19504645	0.727089	1.2836	-0.158391	jun	0.0526979	jun->creb5a	20.8894	0.132718	0	0	2.12638	1.04711	0	2.03512	Superficial_Epithelial_0dpa
creb5a#chr19:19503564-19505156	chr19:19503564-19505156	TSS	0	creb5a	MA1129.1	chr19:19503810-19503819	-0.148933	0.696046	0.479591	jun	0.0526979	jun->creb5a	20.8894	0.132718	0	0	2.12638	1.04711	0	2.03512	Superficial_Epithelial_0dpa
creb5a#chr19:19503564-19505156	chr19:19503564-19505156	TSS	0	creb5a	MA1129.1	chr19:19503901-19503910	0.0840098	0.243924	-0.0053782	jun	0.0526979	jun->creb5a	20.8894	0.132718	0	0	2.12638	1.04711	0	2.03512	Superficial_Epithelial_0dpa
creb5a#chr19:19503564-19505156	chr19:19503564-19505156	TSS	0	creb5a	MA1129.1	chr19:19504636-19504645	0.727089	1.2836	-0.158391	jun	0.0526979	jun->creb5a	20.8894	0.132718	0	0	2.12638	1.04711	0	2.03512	Superficial_Epithelial_0dpa
creb5a#chr19:19503564-19505156	chr19:19503564-19505156	TSS	0	creb5a	MA1131.1	chr19:19503809-19503819	-0.135393	0.730398	0.510743	fosl2	0.0630162	fosl2->creb5a	4.22597	0.0759955	0	0	1.62846	1.04711	0	2.03512	Superficial_Epithelial_0dpa
creb5a#chr19:19503564-19505156	chr19:19503564-19505156	TSS	0	creb5a	MA1131.1	chr19:19503900-19503910	-0.176633	0.672347	0.251705	fosl2	0.0630162	fosl2->creb5a	4.22597	0.0759955	0	0	1.62846	1.04711	0	2.03512	Superficial_Epithelial_0dpa
creb5a#chr19:19503564-19505156	chr19:19503564-19505156	TSS	0	creb5a	MA1131.1	chr19:19504635-19504645	0.727327	1.06337	-0.326236	fosl2	0.0630162	fosl2->creb5a	4.22597	0.0759955	0	0	1.62846	1.04711	0	2.03512	Superficial_Epithelial_0dpa
creb5a#chr19:19503564-19505156	chr19:19503564-19505156	TSS	0	creb5a	MA1131.1	chr19:19503810-19503820	-0.0903071	0.660904	0.462895	fosl2	0.0630162	fosl2->creb5a	4.22597	0.0759955	0	0	1.62846	1.04711	0	2.03512	Superficial_Epithelial_0dpa
creb5a#chr19:19503564-19505156	chr19:19503564-19505156	TSS	0	creb5a	MA1131.1	chr19:19503901-19503911	0.108894	0.293677	-0.0458032	fosl2	0.0630162	fosl2->creb5a	4.22597	0.0759955	0	0	1.62846	1.04711	0	2.03512	Superficial_Epithelial_0dpa
creb5a#chr19:19503564-19505156	chr19:19503564-19505156	TSS	0	creb5a	MA1131.1	chr19:19504636-19504646	0.534648	1.31962	-0.0258035	fosl2	0.0630162	fosl2->creb5a	4.22597	0.0759955	0	0	1.62846	1.04711	0	2.03512	Superficial_Epithelial_0dpa
creb5a#chr19:19503564-19505156	chr19:19503564-19505156	TSS	0	creb5a	MA1133.1	chr19:19503809-19503820	-0.0827815	0.759002	0.470513	jun	0.05518	jun->creb5a	20.8894	0.132718	0	0	2.12638	1.04711	0	2.03512	Superficial_Epithelial_0dpa
creb5a#chr19:19503564-19505156	chr19:19503564-19505156	TSS	0	creb5a	MA1133.1	chr19:19503809-19503820	-0.0827815	0.759002	0.470513	junbb	0.090798	junbb->creb5a	1.93878	0.0752877	0	0	1.09612	1.04711	0	2.03512	Superficial_Epithelial_0dpa
creb5a#chr19:19503564-19505156	chr19:19503564-19505156	TSS	0	creb5a	MA1133.1	chr19:19504635-19504646	0.550903	1.15494	-0.0466428	jun	0.05518	jun->creb5a	20.8894	0.132718	0	0	2.12638	1.04711	0	2.03512	Superficial_Epithelial_0dpa
creb5a#chr19:19503564-19505156	chr19:19503564-19505156	TSS	0	creb5a	MA1133.1	chr19:19504635-19504646	0.550903	1.15494	-0.0466428	junbb	0.090798	junbb->creb5a	1.93878	0.0752877	0	0	1.09612	1.04711	0	2.03512	Superficial_Epithelial_0dpa
creb5a#chr19:19503564-19505156	chr19:19503564-19505156	TSS	0	creb5a	MA1133.1	chr19:19503809-19503820	-0.0827815	0.759002	0.470513	jun	0.05518	jun->creb5a	20.8894	0.132718	0	0	2.12638	1.04711	0	2.03512	Superficial_Epithelial_0dpa
creb5a#chr19:19503564-19505156	chr19:19503564-19505156	TSS	0	creb5a	MA1133.1	chr19:19503809-19503820	-0.0827815	0.759002	0.470513	junbb	0.090798	junbb->creb5a	1.93878	0.0752877	0	0	1.09612	1.04711	0	2.03512	Superficial_Epithelial_0dpa
creb5a#chr19:19503564-19505156	chr19:19503564-19505156	TSS	0	creb5a	MA1133.1	chr19:19503900-19503911	-0.132103	0.907444	0.200096	jun	0.05518	jun->creb5a	20.8894	0.132718	0	0	2.12638	1.04711	0	2.03512	Superficial_Epithelial_0dpa
creb5a#chr19:19503564-19505156	chr19:19503564-19505156	TSS	0	creb5a	MA1133.1	chr19:19503900-19503911	-0.132103	0.907444	0.200096	junbb	0.090798	junbb->creb5a	1.93878	0.0752877	0	0	1.09612	1.04711	0	2.03512	Superficial_Epithelial_0dpa
creb5a#chr19:19503564-19505156	chr19:19503564-19505156	TSS	0	creb5a	MA1136.1	chr19:19503810-19503819	-0.148933	0.696046	0.479591	junbb	0.0827228	junbb->creb5a	1.93878	0.0752877	0	0	1.09612	1.04711	0	2.03512	Superficial_Epithelial_0dpa
creb5a#chr19:19503564-19505156	chr19:19503564-19505156	TSS	0	creb5a	MA1136.1	chr19:19503901-19503910	0.0840098	0.243924	-0.0053782	junbb	0.0827228	junbb->creb5a	1.93878	0.0752877	0	0	1.09612	1.04711	0	2.03512	Superficial_Epithelial_0dpa
creb5a#chr19:19503564-19505156	chr19:19503564-19505156	TSS	0	creb5a	MA1136.1	chr19:19504636-19504645	0.727089	1.2836	-0.158391	junbb	0.0827228	junbb->creb5a	1.93878	0.0752877	0	0	1.09612	1.04711	0	2.03512	Superficial_Epithelial_0dpa
creb5a#chr19:19503564-19505156	chr19:19503564-19505156	TSS	0	creb5a	MA1136.1	chr19:19503810-19503819	-0.148933	0.696046	0.479591	junbb	0.0827228	junbb->creb5a	1.93878	0.0752877	0	0	1.09612	1.04711	0	2.03512	Superficial_Epithelial_0dpa
creb5a#chr19:19503564-19505156	chr19:19503564-19505156	TSS	0	creb5a	MA1136.1	chr19:19503901-19503910	0.0840098	0.243924	-0.0053782	junbb	0.0827228	junbb->creb5a	1.93878	0.0752877	0	0	1.09612	1.04711	0	2.03512	Superficial_Epithelial_0dpa
creb5a#chr19:19503564-19505156	chr19:19503564-19505156	TSS	0	creb5a	MA1136.1	chr19:19504636-19504645	0.727089	1.2836	-0.158391	junbb	0.0827228	junbb->creb5a	1.93878	0.0752877	0	0	1.09612	1.04711	0	2.03512	Superficial_Epithelial_0dpa
creb5a#chr19:19503564-19505156	chr19:19503564-19505156	TSS	0	creb5a	MA1139.1	chr19:19503809-19503820	-0.0827815	0.759002	0.470513	fosl2	0.0569617	fosl2->creb5a	4.22597	0.0759955	0	0	1.62846	1.04711	0	2.03512	Superficial_Epithelial_0dpa
creb5a#chr19:19503564-19505156	chr19:19503564-19505156	TSS	0	creb5a	MA1139.1	chr19:19503809-19503820	-0.0827815	0.759002	0.470513	junbb	0.0817679	junbb->creb5a	1.93878	0.0752877	0	0	1.09612	1.04711	0	2.03512	Superficial_Epithelial_0dpa
creb5a#chr19:19503564-19505156	chr19:19503564-19505156	TSS	0	creb5a	MA1139.1	chr19:19503900-19503911	-0.132103	0.907444	0.200096	fosl2	0.0569617	fosl2->creb5a	4.22597	0.0759955	0	0	1.62846	1.04711	0	2.03512	Superficial_Epithelial_0dpa
creb5a#chr19:19503564-19505156	chr19:19503564-19505156	TSS	0	creb5a	MA1139.1	chr19:19503900-19503911	-0.132103	0.907444	0.200096	junbb	0.0817679	junbb->creb5a	1.93878	0.0752877	0	0	1.09612	1.04711	0	2.03512	Superficial_Epithelial_0dpa
creb5a#chr19:19503564-19505156	chr19:19503564-19505156	TSS	0	creb5a	MA1139.1	chr19:19504635-19504646	0.550903	1.15494	-0.0466428	fosl2	0.0569617	fosl2->creb5a	4.22597	0.0759955	0	0	1.62846	1.04711	0	2.03512	Superficial_Epithelial_0dpa
creb5a#chr19:19503564-19505156	chr19:19503564-19505156	TSS	0	creb5a	MA1139.1	chr19:19504635-19504646	0.550903	1.15494	-0.0466428	junbb	0.0817679	junbb->creb5a	1.93878	0.0752877	0	0	1.09612	1.04711	0	2.03512	Superficial_Epithelial_0dpa
creb5a#chr19:19503564-19505156	chr19:19503564-19505156	TSS	0	creb5a	MA1139.1	chr19:19503809-19503820	-0.0827815	0.759002	0.470513	fosl2	0.0569617	fosl2->creb5a	4.22597	0.0759955	0	0	1.62846	1.04711	0	2.03512	Superficial_Epithelial_0dpa
creb5a#chr19:19503564-19505156	chr19:19503564-19505156	TSS	0	creb5a	MA1139.1	chr19:19503809-19503820	-0.0827815	0.759002	0.470513	junbb	0.0817679	junbb->creb5a	1.93878	0.0752877	0	0	1.09612	1.04711	0	2.03512	Superficial_Epithelial_0dpa
creb5a#chr19:19503564-19505156	chr19:19503564-19505156	TSS	0	creb5a	MA1139.1	chr19:19503900-19503911	-0.132103	0.907444	0.200096	fosl2	0.0569617	fosl2->creb5a	4.22597	0.0759955	0	0	1.62846	1.04711	0	2.03512	Superficial_Epithelial_0dpa
creb5a#chr19:19503564-19505156	chr19:19503564-19505156	TSS	0	creb5a	MA1139.1	chr19:19503900-19503911	-0.132103	0.907444	0.200096	junbb	0.0817679	junbb->creb5a	1.93878	0.0752877	0	0	1.09612	1.04711	0	2.03512	Superficial_Epithelial_0dpa
creb5a#chr19:19503564-19505156	chr19:19503564-19505156	TSS	0	creb5a	MA1139.1	chr19:19504635-19504646	0.550903	1.15494	-0.0466428	fosl2	0.0569617	fosl2->creb5a	4.22597	0.0759955	0	0	1.62846	1.04711	0	2.03512	Superficial_Epithelial_0dpa
creb5a#chr19:19503564-19505156	chr19:19503564-19505156	TSS	0	creb5a	MA1139.1	chr19:19504635-19504646	0.550903	1.15494	-0.0466428	junbb	0.0817679	junbb->creb5a	1.93878	0.0752877	0	0	1.09612	1.04711	0	2.03512	Superficial_Epithelial_0dpa
creb5a#chr19:19503564-19505156	chr19:19503564-19505156	TSS	0	creb5a	MA1140.2	chr19:19503809-19503820	-0.0827815	0.759002	0.470513	junbb	0.0902616	junbb->creb5a	1.93878	0.0752877	0	0	1.09612	1.04711	0	2.03512	Superficial_Epithelial_0dpa
creb5a#chr19:19503564-19505156	chr19:19503564-19505156	TSS	0	creb5a	MA1140.2	chr19:19503900-19503911	-0.132103	0.907444	0.200096	junbb	0.0902616	junbb->creb5a	1.93878	0.0752877	0	0	1.09612	1.04711	0	2.03512	Superficial_Epithelial_0dpa
creb5a#chr19:19503564-19505156	chr19:19503564-19505156	TSS	0	creb5a	MA1140.2	chr19:19504635-19504646	0.550903	1.15494	-0.0466428	junbb	0.0902616	junbb->creb5a	1.93878	0.0752877	0	0	1.09612	1.04711	0	2.03512	Superficial_Epithelial_0dpa
creb5a#chr19:19503564-19505156	chr19:19503564-19505156	TSS	0	creb5a	MA1140.2	chr19:19503809-19503820	-0.0827815	0.759002	0.470513	junbb	0.0902616	junbb->creb5a	1.93878	0.0752877	0	0	1.09612	1.04711	0	2.03512	Superficial_Epithelial_0dpa
creb5a#chr19:19503564-19505156	chr19:19503564-19505156	TSS	0	creb5a	MA1140.2	chr19:19503900-19503911	-0.132103	0.907444	0.200096	junbb	0.0902616	junbb->creb5a	1.93878	0.0752877	0	0	1.09612	1.04711	0	2.03512	Superficial_Epithelial_0dpa
creb5a#chr19:19503564-19505156	chr19:19503564-19505156	TSS	0	creb5a	MA1140.2	chr19:19504635-19504646	0.550903	1.15494	-0.0466428	junbb	0.0902616	junbb->creb5a	1.93878	0.0752877	0	0	1.09612	1.04711	0	2.03512	Superficial_Epithelial_0dpa
creb5a#chr19:19503564-19505156	chr19:19503564-19505156	TSS	0	creb5a	MA0609.2	chr19:19503807-19503822	0.0808682	0.432231	0.584817	crema	0.0998319	crema->creb5a	4.78537	0.0690397	0	0	1.34056	1.04711	0	2.03512	Superficial_Epithelial_0dpa
creb5a#chr19:19503564-19505156	chr19:19503564-19505156	TSS	0	creb5a	MA0609.2	chr19:19504633-19504648	-0.0546108	1.32305	0.0933887	crema	0.0998319	crema->creb5a	4.78537	0.0690397	0	0	1.34056	1.04711	0	2.03512	Superficial_Epithelial_0dpa
creb5a#chr19:19503564-19505156	chr19:19503564-19505156	TSS	0	creb5a	MA0609.2	chr19:19503807-19503822	0.0808682	0.432231	0.584817	crema	0.0998319	crema->creb5a	4.78537	0.0690397	0	0	1.34056	1.04711	0	2.03512	Superficial_Epithelial_0dpa
creb5a#chr19:19503564-19505156	chr19:19503564-19505156	TSS	0	creb5a	MA0609.2	chr19:19504633-19504648	-0.0546108	1.32305	0.0933887	crema	0.0998319	crema->creb5a	4.78537	0.0690397	0	0	1.34056	1.04711	0	2.03512	Superficial_Epithelial_0dpa
creb5a#chr19:19503564-19505156	chr19:19503564-19505156	TSS	0	creb5a	MA1951.1	chr19:19503808-19503821	0.0502467	0.525868	0.360518	fosab	0.154414	fosab->creb5a	4.47521	0.085861	0	0	2.65236	1.04711	0	2.03512	Superficial_Epithelial_0dpa
creb5a#chr19:19503564-19505156	chr19:19503564-19505156	TSS	0	creb5a	MA1951.1	chr19:19503899-19503912	-0.0852678	0.833007	0.124121	fosab	0.154414	fosab->creb5a	4.47521	0.085861	0	0	2.65236	1.04711	0	2.03512	Superficial_Epithelial_0dpa
creb5a#chr19:19503564-19505156	chr19:19503564-19505156	TSS	0	creb5a	MA1951.1	chr19:19504634-19504647	0.414833	1.04195	-0.0709218	fosab	0.154414	fosab->creb5a	4.47521	0.085861	0	0	2.65236	1.04711	0	2.03512	Superficial_Epithelial_0dpa
creb5a#chr19:19503564-19505156	chr19:19503564-19505156	TSS	0	creb5a	MA1951.1	chr19:19503808-19503821	0.0502467	0.525868	0.360518	fosab	0.154414	fosab->creb5a	4.47521	0.085861	0	0	2.65236	1.04711	0	2.03512	Superficial_Epithelial_0dpa
creb5a#chr19:19503564-19505156	chr19:19503564-19505156	TSS	0	creb5a	MA1951.1	chr19:19504634-19504647	0.414833	1.04195	-0.0709218	fosab	0.154414	fosab->creb5a	4.47521	0.085861	0	0	2.65236	1.04711	0	2.03512	Superficial_Epithelial_0dpa
creb5a#chr19:19505510-19506260	chr19:19505510-19506260	TSS	0	creb5a	MA0478.1	chr19:19505890-19505900	-1.33348	2.33493	1.40264	fosl2	0.0934041	fosl2->creb5a	4.22597	0.0759955	0	0	1.62846	1.04711	0	1.21352	Superficial_Epithelial_0dpa
creb5a#chr19:19505510-19506260	chr19:19505510-19506260	TSS	0	creb5a	MA1128.1	chr19:19505888-19505900	-1.12833	2.06931	1.41467	fosl1a	0.122265	fosl1a->creb5a	5.34582	0.0841974	0	0	2.74651	1.04711	0	1.21352	Superficial_Epithelial_0dpa
creb5a#chr19:19505510-19506260	chr19:19505510-19506260	TSS	0	creb5a	MA1130.1	chr19:19505888-19505899	-0.949627	1.91248	0.953016	fosl2	0.0837069	fosl2->creb5a	4.22597	0.0759955	0	0	1.62846	1.04711	0	1.21352	Superficial_Epithelial_0dpa
creb5a#chr19:19505510-19506260	chr19:19505510-19506260	TSS	0	creb5a	MA1130.1	chr19:19505889-19505900	-1.22236	2.17523	1.32594	fosl2	0.0837069	fosl2->creb5a	4.22597	0.0759955	0	0	1.62846	1.04711	0	1.21352	Superficial_Epithelial_0dpa
creb5a#chr19:19505510-19506260	chr19:19505510-19506260	TSS	0	creb5a	MA1137.1	chr19:19505888-19505900	-1.12833	2.06931	1.41467	fosl1a	0.123797	fosl1a->creb5a	5.34582	0.0841974	0	0	2.74651	1.04711	0	1.21352	Superficial_Epithelial_0dpa
creb5a#chr19:19505510-19506260	chr19:19505510-19506260	TSS	0	creb5a	MA1138.1	chr19:19505889-19505898	-0.93236	2.02079	0.856689	fosl2	0.084033	fosl2->creb5a	4.22597	0.0759955	0	0	1.62846	1.04711	0	1.21352	Superficial_Epithelial_0dpa
creb5a#chr19:19505510-19506260	chr19:19505510-19506260	TSS	0	creb5a	MA1138.1	chr19:19505890-19505899	-1.13955	2.1541	1.17048	fosl2	0.084033	fosl2->creb5a	4.22597	0.0759955	0	0	1.62846	1.04711	0	1.21352	Superficial_Epithelial_0dpa
creb5a#chr19:19505510-19506260	chr19:19505510-19506260	TSS	0	creb5a	MA1142.1	chr19:19505890-19505899	-1.13955	2.1541	1.17048	fosl1a	0.132058	fosl1a->creb5a	5.34582	0.0841974	0	0	2.74651	1.04711	0	1.21352	Superficial_Epithelial_0dpa
creb5a#chr19:19505510-19506260	chr19:19505510-19506260	TSS	0	creb5a	MA1144.1	chr19:19505889-19505898	-0.93236	2.02079	0.856689	fosl2	0.0824373	fosl2->creb5a	4.22597	0.0759955	0	0	1.62846	1.04711	0	1.21352	Superficial_Epithelial_0dpa
creb5a#chr19:19505510-19506260	chr19:19505510-19506260	TSS	0	creb5a	MA0477.2	chr19:19505888-19505900	-1.12833	2.06931	1.41467	fosl1a	0.126437	fosl1a->creb5a	5.34582	0.0841974	0	0	2.74651	1.04711	0	1.21352	Superficial_Epithelial_0dpa
creb5a#chr19:19505510-19506260	chr19:19505510-19506260	TSS	0	creb5a	MA0477.2	chr19:19505888-19505900	-1.12833	2.06931	1.41467	fosl1a	0.126437	fosl1a->creb5a	5.34582	0.0841974	0	0	2.74651	1.04711	0	1.21352	Superficial_Epithelial_0dpa
creb5b#chr16:20707136-20708036	chr16:20707136-20708036	Body	0.096	creb5b	MA0656.1	chr16:20707753-20707764	0.0451163	0.083002	0.669634	jdp2b	0.138912	jdp2b->creb5b	1.41555	0.0653062	0	0	1.27829	0.361049	0	1.68354	Superficial_Epithelial_0dpa
creb5b#chr16:20707136-20708036	chr16:20707136-20708036	Body	0.096	creb5b	MA0656.1	chr16:20707753-20707764	0.0451163	0.083002	0.669634	jdp2b	0.138912	jdp2b->creb5b	1.41555	0.0653062	0	0	1.27829	0.361049	0	1.68354	Superficial_Epithelial_0dpa
creb5b#chr16:20707136-20708036	chr16:20707136-20708036	Body	0.096	creb5b	MA0147.3	chr16:20707758-20707769	-0.207367	0.345636	1.293	mycb	0.052455	mycb->creb5b	1.64058	0.0625944	0	0	0.281657	0.361049	0	1.68354	Superficial_Epithelial_0dpa
creb5b#chr16:20707136-20708036	chr16:20707136-20708036	Body	0.096	creb5b	MA1133.1	chr16:20707753-20707764	0.0451163	0.083002	0.669634	junbb	0.090798	junbb->creb5b	1.12739	0.0615718	0	0	1.09612	0.361049	0	1.68354	Superficial_Epithelial_0dpa
creb5b#chr16:20707136-20708036	chr16:20707136-20708036	Body	0.096	creb5b	MA1139.1	chr16:20707753-20707764	0.0451163	0.083002	0.669634	junbb	0.0817679	junbb->creb5b	1.12739	0.0615718	0	0	1.09612	0.361049	0	1.68354	Superficial_Epithelial_0dpa
creb5b#chr16:20707136-20708036	chr16:20707136-20708036	Body	0.096	creb5b	MA1139.1	chr16:20707753-20707764	0.0451163	0.083002	0.669634	junbb	0.0817679	junbb->creb5b	1.12739	0.0615718	0	0	1.09612	0.361049	0	1.68354	Superficial_Epithelial_0dpa
creb5b#chr16:20707136-20708036	chr16:20707136-20708036	Body	0.096	creb5b	MA1140.2	chr16:20707753-20707764	0.0451163	0.083002	0.669634	junbb	0.0902616	junbb->creb5b	1.12739	0.0615718	0	0	1.09612	0.361049	0	1.68354	Superficial_Epithelial_0dpa
creb5b#chr16:20707136-20708036	chr16:20707136-20708036	Body	0.096	creb5b	MA1140.2	chr16:20707753-20707764	0.0451163	0.083002	0.669634	junbb	0.0902616	junbb->creb5b	1.12739	0.0615718	0	0	1.09612	0.361049	0	1.68354	Superficial_Epithelial_0dpa
creb5b#chr16:20707136-20708036	chr16:20707136-20708036	Body	0.096	creb5b	MA0609.2	chr16:20707751-20707766	-0.254562	0.765336	1.15685	crema	0.0998319	crema->creb5b	2.31601	0.0730179	0	0	1.34056	0.361049	0	1.68354	Superficial_Epithelial_0dpa
creb5b#chr16:20707136-20708036	chr16:20707136-20708036	Body	0.096	creb5b	MA0609.2	chr16:20707751-20707766	-0.254562	0.765336	1.15685	crema	0.0998319	crema->creb5b	2.31601	0.0730179	0	0	1.34056	0.361049	0	1.68354	Superficial_Epithelial_0dpa
creb5b#chr16:20707136-20708036	chr16:20707136-20708036	TSS	0.096	creb5b	MA0656.1	chr16:20707753-20707764	0.0451163	0.083002	0.669634	jdp2b	0.138912	jdp2b->creb5b	1.41555	0.0653062	0	0	1.27829	0.361049	0	1.68354	Superficial_Epithelial_0dpa
creb5b#chr16:20707136-20708036	chr16:20707136-20708036	TSS	0.096	creb5b	MA0656.1	chr16:20707753-20707764	0.0451163	0.083002	0.669634	jdp2b	0.138912	jdp2b->creb5b	1.41555	0.0653062	0	0	1.27829	0.361049	0	1.68354	Superficial_Epithelial_0dpa
creb5b#chr16:20707136-20708036	chr16:20707136-20708036	TSS	0.096	creb5b	MA0147.3	chr16:20707758-20707769	-0.207367	0.345636	1.293	mycb	0.052455	mycb->creb5b	1.64058	0.0625944	0	0	0.281657	0.361049	0	1.68354	Superficial_Epithelial_0dpa
creb5b#chr16:20707136-20708036	chr16:20707136-20708036	TSS	0.096	creb5b	MA1133.1	chr16:20707753-20707764	0.0451163	0.083002	0.669634	junbb	0.090798	junbb->creb5b	1.12739	0.0615718	0	0	1.09612	0.361049	0	1.68354	Superficial_Epithelial_0dpa
creb5b#chr16:20707136-20708036	chr16:20707136-20708036	TSS	0.096	creb5b	MA1139.1	chr16:20707753-20707764	0.0451163	0.083002	0.669634	junbb	0.0817679	junbb->creb5b	1.12739	0.0615718	0	0	1.09612	0.361049	0	1.68354	Superficial_Epithelial_0dpa
creb5b#chr16:20707136-20708036	chr16:20707136-20708036	TSS	0.096	creb5b	MA1139.1	chr16:20707753-20707764	0.0451163	0.083002	0.669634	junbb	0.0817679	junbb->creb5b	1.12739	0.0615718	0	0	1.09612	0.361049	0	1.68354	Superficial_Epithelial_0dpa
creb5b#chr16:20707136-20708036	chr16:20707136-20708036	TSS	0.096	creb5b	MA1140.2	chr16:20707753-20707764	0.0451163	0.083002	0.669634	junbb	0.0902616	junbb->creb5b	1.12739	0.0615718	0	0	1.09612	0.361049	0	1.68354	Superficial_Epithelial_0dpa
creb5b#chr16:20707136-20708036	chr16:20707136-20708036	TSS	0.096	creb5b	MA1140.2	chr16:20707753-20707764	0.0451163	0.083002	0.669634	junbb	0.0902616	junbb->creb5b	1.12739	0.0615718	0	0	1.09612	0.361049	0	1.68354	Superficial_Epithelial_0dpa
creb5b#chr16:20707136-20708036	chr16:20707136-20708036	TSS	0.096	creb5b	MA0609.2	chr16:20707751-20707766	-0.254562	0.765336	1.15685	crema	0.0998319	crema->creb5b	2.31601	0.0730179	0	0	1.34056	0.361049	0	1.68354	Superficial_Epithelial_0dpa
creb5b#chr16:20707136-20708036	chr16:20707136-20708036	TSS	0.096	creb5b	MA0609.2	chr16:20707751-20707766	-0.254562	0.765336	1.15685	crema	0.0998319	crema->creb5b	2.31601	0.0730179	0	0	1.34056	0.361049	0	1.68354	Superficial_Epithelial_0dpa
crebbpa#chr22:26702424-26704958	chr22:26702424-26704958	TSS	0	crebbpa	MA0517.1	chr22:26702767-26702781	-0.00845478	0.782864	0.396165	stat1a	0.0569912	stat1a->crebbpa	2.94055	0.0699603	0	0	1.21024	0.425299	0	1.53771	Superficial_Epithelial_0dpa
crebbpb#chr3:9722102-9723818	chr3:9722102-9723818	Body	0.052	crebbpb	MA0059.1	chr3:9722353-9722363	-0.145885	0.37528	0.166378	max	0.0600174	max->crebbpb	2.85667	0.0645652	0	0	0.485417	0.909587	0	1.46741	Superficial_Epithelial_0dpa
crebbpb#chr3:9722102-9723818	chr3:9722102-9723818	Body	0.052	crebbpb	MA0059.1	chr3:9722354-9722364	-0.145885	0.37528	0.166378	max	0.0600174	max->crebbpb	2.85667	0.0645652	0	0	0.485417	0.909587	0	1.46741	Superficial_Epithelial_0dpa
crebbpb#chr3:9722102-9723818	chr3:9722102-9723818	Body	0.052	crebbpb	MA0695.1	chr3:9723150-9723161	-0.342582	0.698224	0.0987353	zbtb7c	0.077786	zbtb7c->crebbpb	1.23821	0.0589895	0	0	0.123195	0.909587	0	1.46741	Superficial_Epithelial_0dpa
crebbpb#chr3:9722102-9723818	chr3:9722102-9723818	Body	0.052	crebbpb	MA0058.3	chr3:9722354-9722363	-0.160473	0.41812	0.198204	max	0.0781341	max->crebbpb	2.85667	0.0645652	0	0	0.485417	0.909587	0	1.46741	Superficial_Epithelial_0dpa
crebbpb#chr3:9722102-9723818	chr3:9722102-9723818	TSS	0.052	crebbpb	MA0059.1	chr3:9722353-9722363	-0.145885	0.37528	0.166378	max	0.0600174	max->crebbpb	2.85667	0.0645652	0	0	0.485417	0.909587	0	1.46741	Superficial_Epithelial_0dpa
crebbpb#chr3:9722102-9723818	chr3:9722102-9723818	TSS	0.052	crebbpb	MA0059.1	chr3:9722354-9722364	-0.145885	0.37528	0.166378	max	0.0600174	max->crebbpb	2.85667	0.0645652	0	0	0.485417	0.909587	0	1.46741	Superficial_Epithelial_0dpa
crebbpb#chr3:9722102-9723818	chr3:9722102-9723818	TSS	0.052	crebbpb	MA0695.1	chr3:9723150-9723161	-0.342582	0.698224	0.0987353	zbtb7c	0.077786	zbtb7c->crebbpb	1.23821	0.0589895	0	0	0.123195	0.909587	0	1.46741	Superficial_Epithelial_0dpa
crebbpb#chr3:9722102-9723818	chr3:9722102-9723818	TSS	0.052	crebbpb	MA0058.3	chr3:9722354-9722363	-0.160473	0.41812	0.198204	max	0.0781341	max->crebbpb	2.85667	0.0645652	0	0	0.485417	0.909587	0	1.46741	Superficial_Epithelial_0dpa
crema#chr2:43191190-43191580	chr2:43191190-43191580	TSS	0	crema	MA0656.1	chr2:43191271-43191282	-0.0555329	0.0616901	0.0564071	jdp2b	0.138912	jdp2b->crema	1.75551	0.0833229	0	0	1.27829	1.34056	0	0.860875	Superficial_Epithelial_0dpa
crema#chr2:43191190-43191580	chr2:43191190-43191580	TSS	0	crema	MA1126.1	chr2:43191271-43191286	-0.0447861	0.0587125	0.0594829	fosab	0.10646	fosab->crema	3.12139	0.0802007	0	0	2.65236	1.34056	0	0.860875	Superficial_Epithelial_0dpa
crema#chr2:43195703-43197089	chr2:43195703-43197089	TSS	0	crema	MA1126.1	chr2:43195900-43195915	-0.0666624	0.0842095	0.0431644	fosab	0.10646	fosab->crema	3.12139	0.0802007	0	0	2.65236	1.34056	0	1.8696	Superficial_Epithelial_0dpa
crfb4#chr9:16061857-16063558	chr9:16061857-16063558	TSS	0	crfb4	MA1955.1	chr9:16062565-16062578	-0.137698	-0.0244891	0.41552	elk3	0.0570459	elk3->crfb4	3.93675	0.0644957	0	0	0.322853	1.5002	0	1.50153	Superficial_Epithelial_0dpa
crip1#chr17:37394859-37397110	chr17:37394859-37397110	Body	0.055	crip1	MA0517.1	chr17:37395777-37395791	-0.156119	-0.0623235	1.00413	stat1a	0.0569912	stat1a->crip1	1.28121	0.0394224	0	0	1.21024	1.54458	0	3.31484	Superficial_Epithelial_0dpa
crip1#chr17:37394859-37397110	chr17:37394859-37397110	Body	0.055	crip1	MA0656.1	chr17:37396512-37396523	-0.0798812	0.109746	0.0943976	jdp2b	0.138912	jdp2b->crip1	3.36934	0.0523551	0	0	1.27829	1.54458	0	3.31484	Superficial_Epithelial_0dpa
crip1#chr17:37394859-37397110	chr17:37394859-37397110	Body	0.055	crip1	MA0464.2	chr17:37395567-37395576	-0.644302	0.447108	0.893852	bhlhe40	0.0593062	bhlhe40->crip1	1.72626	0.0475002	0	0	1.1581	1.54458	0	3.31484	Superficial_Epithelial_0dpa
crip1#chr17:37394859-37397110	chr17:37394859-37397110	Body	0.055	crip1	MA0464.2	chr17:37395836-37395845	-0.591543	1.58015	0.62264	bhlhe40	0.0593062	bhlhe40->crip1	1.72626	0.0475002	0	0	1.1581	1.54458	0	3.31484	Superficial_Epithelial_0dpa
crip1#chr17:37394859-37397110	chr17:37394859-37397110	Body	0.055	crip1	MA0464.2	chr17:37395836-37395845	-0.591543	1.58015	0.62264	bhlhe40	0.0593062	bhlhe40->crip1	1.72626	0.0475002	0	0	1.1581	1.54458	0	3.31484	Superficial_Epithelial_0dpa
crip1#chr17:37394859-37397110	chr17:37394859-37397110	Body	0.055	crip1	MA0840.1	chr17:37396512-37396523	-0.0798812	0.109746	0.0943976	creb5b	0.128114	creb5b->crip1	8.24621	0.0933409	0	0	0.361049	1.54458	0	3.31484	Superficial_Epithelial_0dpa
crip1#chr17:37394859-37397110	chr17:37394859-37397110	Body	0.055	crip1	MA1131.1	chr17:37396513-37396523	-0.086965	0.110219	0.10665	fosl2	0.0630162	fosl2->crip1	11.4733	0.0962433	0	0	1.62846	1.54458	0	3.31484	Superficial_Epithelial_0dpa
crip1#chr17:37394859-37397110	chr17:37394859-37397110	Body	0.055	crip1	MA1136.1	chr17:37396513-37396522	-0.0717924	0.080428	0.0754015	junba	0.0510403	junba->crip1	1.40643	0.0436071	0	0	1.93563	1.54458	0	3.31484	Superficial_Epithelial_0dpa
crip1#chr17:37394859-37397110	chr17:37394859-37397110	Body	0.055	crip1	MA1136.1	chr17:37396513-37396522	-0.0717924	0.080428	0.0754015	junba	0.0510403	junba->crip1	1.40643	0.0436071	0	0	1.93563	1.54458	0	3.31484	Superficial_Epithelial_0dpa
crip1#chr17:37394859-37397110	chr17:37394859-37397110	TSS	0.055	crip1	MA0517.1	chr17:37395777-37395791	-0.156119	-0.0623235	1.00413	stat1a	0.0569912	stat1a->crip1	1.28121	0.0394224	0	0	1.21024	1.54458	0	3.31484	Superficial_Epithelial_0dpa
crip1#chr17:37394859-37397110	chr17:37394859-37397110	TSS	0.055	crip1	MA0656.1	chr17:37396512-37396523	-0.0798812	0.109746	0.0943976	jdp2b	0.138912	jdp2b->crip1	3.36934	0.0523551	0	0	1.27829	1.54458	0	3.31484	Superficial_Epithelial_0dpa
crip1#chr17:37394859-37397110	chr17:37394859-37397110	TSS	0.055	crip1	MA0464.2	chr17:37395567-37395576	-0.644302	0.447108	0.893852	bhlhe40	0.0593062	bhlhe40->crip1	1.72626	0.0475002	0	0	1.1581	1.54458	0	3.31484	Superficial_Epithelial_0dpa
crip1#chr17:37394859-37397110	chr17:37394859-37397110	TSS	0.055	crip1	MA0464.2	chr17:37395836-37395845	-0.591543	1.58015	0.62264	bhlhe40	0.0593062	bhlhe40->crip1	1.72626	0.0475002	0	0	1.1581	1.54458	0	3.31484	Superficial_Epithelial_0dpa
crip1#chr17:37394859-37397110	chr17:37394859-37397110	TSS	0.055	crip1	MA0464.2	chr17:37395836-37395845	-0.591543	1.58015	0.62264	bhlhe40	0.0593062	bhlhe40->crip1	1.72626	0.0475002	0	0	1.1581	1.54458	0	3.31484	Superficial_Epithelial_0dpa
crip1#chr17:37394859-37397110	chr17:37394859-37397110	TSS	0.055	crip1	MA0840.1	chr17:37396512-37396523	-0.0798812	0.109746	0.0943976	creb5b	0.128114	creb5b->crip1	8.24621	0.0933409	0	0	0.361049	1.54458	0	3.31484	Superficial_Epithelial_0dpa
crip1#chr17:37394859-37397110	chr17:37394859-37397110	TSS	0.055	crip1	MA1131.1	chr17:37396513-37396523	-0.086965	0.110219	0.10665	fosl2	0.0630162	fosl2->crip1	11.4733	0.0962433	0	0	1.62846	1.54458	0	3.31484	Superficial_Epithelial_0dpa
crip1#chr17:37394859-37397110	chr17:37394859-37397110	TSS	0.055	crip1	MA1136.1	chr17:37396513-37396522	-0.0717924	0.080428	0.0754015	junba	0.0510403	junba->crip1	1.40643	0.0436071	0	0	1.93563	1.54458	0	3.31484	Superficial_Epithelial_0dpa
crip1#chr17:37394859-37397110	chr17:37394859-37397110	TSS	0.055	crip1	MA1136.1	chr17:37396513-37396522	-0.0717924	0.080428	0.0754015	junba	0.0510403	junba->crip1	1.40643	0.0436071	0	0	1.93563	1.54458	0	3.31484	Superficial_Epithelial_0dpa
cry1a#chr4:12012240-12013877	chr4:12012240-12013877	TSS	0	cry1a	MA0653.1	chr4:12013670-12013684	-0.0492263	0.084003	0.0452833	irf9	0.0507077	irf9->cry1a	1.22843	0.0605142	0	0	0.4291	0.534117	0	1.84774	Superficial_Epithelial_0dpa
cry3a#chr8:21224305-21225676	chr8:21224305-21225676	TSS	0	cry3a	MA0695.1	chr8:21225655-21225666	-0.0424492	0.0693271	0.0508062	zbtb7c	0.077786	zbtb7c->cry3a	2.40817	0.0689584	0	0	0.123195	0.259542	0	1.41517	Superficial_Epithelial_0dpa
cry3a#chr8:21224305-21225676	chr8:21224305-21225676	TSS	0	cry3a	MA0734.3	chr8:21225654-21225666	-0.0391839	0.0629322	0.0453754	gli2a	0.101933	gli2a->cry3a	3.99669	0.0825994	0	0	0.0506187	0.259542	0	1.41517	Superficial_Epithelial_0dpa
crybg1a#chr17:25518652-25520659	chr17:25518652-25520659	TSS	0	crybg1a	MA1633.2	chr17:25520461-25520469	-0.0571144	0.0500623	0.130027	bach1b	0.0601907	bach1b->crybg1a	5.74948	0.110819	0	0	0.925602	1.77198	0	1.31381	Superficial_Epithelial_0dpa
csf1b#chr8:37167666-37169089	chr8:37167666-37169089	Body	0.112	csf1b	MA1101.2	chr8:37168010-37168028	-0.225929	0.303075	0.391974	bach2b	0.0657534	bach2b->csf1b	7.31271	0.150667	0	0	0.209666	0.103154	0	1.00242	Superficial_Epithelial_0dpa
csf1b#chr8:37167666-37169089	chr8:37167666-37169089	Body	0.112	csf1b	MA1101.2	chr8:37168010-37168028	-0.225929	0.303075	0.391974	bach2b	0.0657534	bach2b->csf1b	7.31271	0.150667	0	0	0.209666	0.103154	0	1.00242	Superficial_Epithelial_0dpa
csf1b#chr8:37167666-37169089	chr8:37167666-37169089	TSS	0.112	csf1b	MA1101.2	chr8:37168010-37168028	-0.225929	0.303075	0.391974	bach2b	0.0657534	bach2b->csf1b	7.31271	0.150667	0	0	0.209666	0.103154	0	1.00242	Superficial_Epithelial_0dpa
csf1b#chr8:37167666-37169089	chr8:37167666-37169089	TSS	0.112	csf1b	MA1101.2	chr8:37168010-37168028	-0.225929	0.303075	0.391974	bach2b	0.0657534	bach2b->csf1b	7.31271	0.150667	0	0	0.209666	0.103154	0	1.00242	Superficial_Epithelial_0dpa
csnk1da#chr3:36208290-36209101	chr3:36208290-36209101	TSS	0	csnk1da	MA1129.1	chr3:36208833-36208842	0.0373301	0.153054	0.0898545	jun	0.0526979	jun->csnk1da	5.06516	0.0670347	0	0	2.12638	2.33675	0	1.30665	Superficial_Epithelial_0dpa
csnk1da#chr3:36208290-36209101	chr3:36208290-36209101	TSS	0	csnk1da	MA1129.1	chr3:36208833-36208842	0.0373301	0.153054	0.0898545	jun	0.0526979	jun->csnk1da	5.06516	0.0670347	0	0	2.12638	2.33675	0	1.30665	Superficial_Epithelial_0dpa
csnk1da#chr3:36208290-36209101	chr3:36208290-36209101	TSS	0	csnk1da	MA1133.1	chr3:36208832-36208843	0.047464	0.317691	0.0203508	jun	0.05518	jun->csnk1da	5.06516	0.0670347	0	0	2.12638	2.33675	0	1.30665	Superficial_Epithelial_0dpa
csnk1da#chr3:36209544-36211581	chr3:36209544-36211581	TSS	0	csnk1da	MA1509.1	chr3:36211103-36211111	-0.012301	0.426042	0.94334	irf6	0.0899394	irf6->csnk1da	5.23327	0.0782738	0	0	0.476886	2.33675	0	2.21404	Superficial_Epithelial_0dpa
csnk1db#chr12:33320283-33321631	chr12:33320283-33321631	Body	0.071	csnk1db	MA0147.3	chr12:33320438-33320449	0.288094	-0.455582	0.925264	myca	0.0687634	myca->csnk1db	2.17166	0.0584069	0	0	0.0350607	0.562354	0	1.45048	Superficial_Epithelial_0dpa
csnk1db#chr12:33323093-33324069	chr12:33323093-33324069	Body	0.107	csnk1db	MA0525.2	chr12:33323474-33323491	-0.0210569	0.0622316	0.0910931	tp63	0.180472	tp63->csnk1db	10.1122	0.117077	0	0	0.439364	0.562354	0	0.602796	Superficial_Epithelial_0dpa
csnk1db#chr12:33323093-33324069	chr12:33323093-33324069	Body	0.107	csnk1db	MA0525.2	chr12:33323474-33323491	-0.0210569	0.0622316	0.0910931	tp63	0.180472	tp63->csnk1db	10.1122	0.117077	0	0	0.439364	0.562354	0	0.602796	Superficial_Epithelial_0dpa
csnk1db#chr12:33320283-33321631	chr12:33320283-33321631	TSS	0.071	csnk1db	MA0147.3	chr12:33320438-33320449	0.288094	-0.455582	0.925264	myca	0.0687634	myca->csnk1db	2.17166	0.0584069	0	0	0.0350607	0.562354	0	1.45048	Superficial_Epithelial_0dpa
csrnp1b#chr24:19720190-19721106	chr24:19720190-19721106	TSS	0	csrnp1b	MA0147.3	chr24:19721020-19721031	-0.0954814	0.459185	-0.0555884	mycb	0.052455	mycb->csrnp1b	1.40697	0.0590199	0	0	0.281657	0.828563	0	3.10201	Superficial_Epithelial_0dpa
cst3#chr13:33682740-33684301	chr13:33682740-33684301	Body	0.076	cst3	MA1470.1	chr13:33683896-33683915	0.381984	-0.0779199	0.820962	bach2b	0.193379	bach2b->cst3	17.9739	0.131634	0	0	0.209666	0.765364	0	1.68194	Superficial_Epithelial_0dpa
cst3#chr13:33682740-33684301	chr13:33682740-33684301	TSS	0.076	cst3	MA1470.1	chr13:33683896-33683915	0.381984	-0.0779199	0.820962	bach2b	0.193379	bach2b->cst3	17.9739	0.131634	0	0	0.209666	0.765364	0	1.68194	Superficial_Epithelial_0dpa
CT583625.5#chr22:6777067-6778765	chr22:6777067-6778765	TSS	0	CT583625.5	MA0517.1	chr22:6777237-6777251	-0.00364236	0.0403771	0.118311	stat1b	0.151583	stat1b->CT583625.5	8.40887	0.100137	0	0	0.572188	0.204739	0	1.57882	Superficial_Epithelial_0dpa
CT583625.5#chr22:6777067-6778765	chr22:6777067-6778765	TSS	0	CT583625.5	MA0517.1	chr22:6777243-6777257	-0.0173077	0.0493926	0.132839	stat1b	0.151583	stat1b->CT583625.5	8.40887	0.100137	0	0	0.572188	0.204739	0	1.57882	Superficial_Epithelial_0dpa
ctdsp2#chr23:24680502-24682756	chr23:24680502-24682756	TSS	0	ctdsp2	MA0651.2	chr23:24680706-24680717	-0.285799	0.207981	0.942998	hoxc11a	0.0508956	hoxc11a->ctdsp2	1.41606	0.0527071	0	0	0.0732707	0.381928	0	1.71113	Superficial_Epithelial_0dpa
ctnna1#chr24:34694578-34695737	chr24:34694578-34695737	Inter	0.076	ctnna1	MA1470.1	chr24:34695033-34695052	-0.364538	0.838552	0.627081	bach2b	0.193379	bach2b->ctnna1	9.7136	0.111583	0	0	0.209666	2.12804	0	0.933799	Superficial_Epithelial_0dpa
ctnna1#chr24:34679552-34681411	chr24:34679552-34681411	TSS	0	ctnna1	MA0851.1	chr24:34680180-34680196	-0.0882761	0.346486	0.0693436	foxj3	0.0770929	foxj3->ctnna1	1.19878	0.0486989	0	0	0.643544	2.12804	0	1.56655	Superficial_Epithelial_0dpa
ctnna1#chr24:34679552-34681411	chr24:34679552-34681411	TSS	0	ctnna1	MA1117.1	chr24:34681066-34681076	-0.065819	0.437104	0.186797	relb	0.127546	relb->ctnna1	2.11456	0.0688515	0	0	0.585144	2.12804	0	1.56655	Superficial_Epithelial_0dpa
ctnnd1#chr1:44173031-44175232	chr1:44173031-44175232	TSS	0	ctnnd1	MA0591.1	chr1:44174874-44174888	-0.337648	1.12958	0.659413	bach1b	0.0525138	bach1b->ctnnd1	5.12341	0.081977	0	0	0.925602	1.25997	0	1.90373	Superficial_Epithelial_0dpa
ctsba#chr17:32622652-32624518	chr17:32622652-32624518	Body	0.086	ctsba	MA0004.1	chr17:32622855-32622860	-0.293579	0.193334	0.375769	arnt	0.0611097	arnt->ctsba	1.16088	0.0523496	0	0	0.282055	1.08528	0	1.20927	Superficial_Epithelial_0dpa
ctsba#chr17:32622652-32624518	chr17:32622652-32624518	Body	0.086	ctsba	MA0004.1	chr17:32622855-32622860	-0.293579	0.193334	0.375769	arnt	0.0611097	arnt->ctsba	1.16088	0.0523496	0	0	0.282055	1.08528	0	1.20927	Superficial_Epithelial_0dpa
ctsba#chr17:32622652-32624518	chr17:32622652-32624518	Body	0.086	ctsba	MA0464.2	chr17:32622891-32622900	-0.444526	0.293874	0.744343	bhlhe40	0.0593062	bhlhe40->ctsba	2.40021	0.0519238	0	0	1.1581	1.08528	0	1.20927	Superficial_Epithelial_0dpa
ctsba#chr17:32622652-32624518	chr17:32622652-32624518	Body	0.086	ctsba	MA0464.2	chr17:32622891-32622900	-0.444526	0.293874	0.744343	bhlhe40	0.0593062	bhlhe40->ctsba	2.40021	0.0519238	0	0	1.1581	1.08528	0	1.20927	Superficial_Epithelial_0dpa
ctsba#chr17:32622652-32624518	chr17:32622652-32624518	Body	0.086	ctsba	MA1470.1	chr17:32622754-32622773	-0.0276353	0.00316777	0.301396	bach2b	0.193379	bach2b->ctsba	12.1384	0.117211	0	0	0.209666	1.08528	0	1.20927	Superficial_Epithelial_0dpa
ctsba#chr17:32622652-32624518	chr17:32622652-32624518	Body	0.086	ctsba	MA0598.3	chr17:32623640-32623654	0.070967	0.0914693	0.0314377	ehf	0.0681254	ehf->ctsba	2.11181	0.0604225	0	0	0.212191	1.08528	0	1.20927	Superficial_Epithelial_0dpa
ctsba#chr17:32622652-32624518	chr17:32622652-32624518	TSS	0.086	ctsba	MA0004.1	chr17:32622855-32622860	-0.293579	0.193334	0.375769	arnt	0.0611097	arnt->ctsba	1.16088	0.0523496	0	0	0.282055	1.08528	0	1.20927	Superficial_Epithelial_0dpa
ctsba#chr17:32622652-32624518	chr17:32622652-32624518	TSS	0.086	ctsba	MA0004.1	chr17:32622855-32622860	-0.293579	0.193334	0.375769	arnt	0.0611097	arnt->ctsba	1.16088	0.0523496	0	0	0.282055	1.08528	0	1.20927	Superficial_Epithelial_0dpa
ctsba#chr17:32622652-32624518	chr17:32622652-32624518	TSS	0.086	ctsba	MA0464.2	chr17:32622891-32622900	-0.444526	0.293874	0.744343	bhlhe40	0.0593062	bhlhe40->ctsba	2.40021	0.0519238	0	0	1.1581	1.08528	0	1.20927	Superficial_Epithelial_0dpa
ctsba#chr17:32622652-32624518	chr17:32622652-32624518	TSS	0.086	ctsba	MA0464.2	chr17:32622891-32622900	-0.444526	0.293874	0.744343	bhlhe40	0.0593062	bhlhe40->ctsba	2.40021	0.0519238	0	0	1.1581	1.08528	0	1.20927	Superficial_Epithelial_0dpa
ctsba#chr17:32622652-32624518	chr17:32622652-32624518	TSS	0.086	ctsba	MA1470.1	chr17:32622754-32622773	-0.0276353	0.00316777	0.301396	bach2b	0.193379	bach2b->ctsba	12.1384	0.117211	0	0	0.209666	1.08528	0	1.20927	Superficial_Epithelial_0dpa
ctsba#chr17:32622652-32624518	chr17:32622652-32624518	TSS	0.086	ctsba	MA0598.3	chr17:32623640-32623654	0.070967	0.0914693	0.0314377	ehf	0.0681254	ehf->ctsba	2.11181	0.0604225	0	0	0.212191	1.08528	0	1.20927	Superficial_Epithelial_0dpa
ctsk#chr16:29492838-29494632	chr16:29492838-29494632	TSS	0	ctsk	MA0144.2	chr16:29493804-29493814	-0.134656	0.197261	0.124625	stat3	0.0671814	stat3->ctsk	3.31929	0.110022	0	0	0.981733	0.433559	0	1.71279	Superficial_Epithelial_0dpa
ctsk#chr16:29492838-29494632	chr16:29492838-29494632	TSS	0	ctsk	MA0481.3	chr16:29493179-29493189	-0.029812	0.0910849	0.0368392	foxp1b	0.0976319	foxp1b->ctsk	1.6582	0.0746963	0	0	0.0287816	0.433559	0	1.71279	Superficial_Epithelial_0dpa
ctsla#chr5:44804282-44805672	chr5:44804282-44805672	Body	0.12	ctsla	MA1101.2	chr5:44804503-44804521	-0.0362488	0.0345482	0.111179	bach2b	0.0657534	bach2b->ctsla	15.8865	0.142586	0	0	0.209666	0.250314	0	0.401457	Superficial_Epithelial_0dpa
ctsla#chr5:44804282-44805672	chr5:44804282-44805672	TSS	0.12	ctsla	MA1101.2	chr5:44804503-44804521	-0.0362488	0.0345482	0.111179	bach2b	0.0657534	bach2b->ctsla	15.8865	0.142586	0	0	0.209666	0.250314	0	0.401457	Superficial_Epithelial_0dpa
ctss2.2#chr16:29515888-29517038	chr16:29515888-29517038	TSS	0	ctss2.2	MA0137.3	chr16:29516302-29516312	-0.0631922	0.109787	0.446742	stat1b	0.0662396	stat1b->ctss2.2	6.52367	0.0832868	0	0	0.572188	0.977739	0	1.92208	Superficial_Epithelial_0dpa
cttnbp2nlb#chr8:27846928-27847967	chr8:27846928-27847967	Body	0.096	cttnbp2nlb	MA1470.1	chr8:27847514-27847533	-0.0358142	0.128107	0.14973	bach2b	0.193379	bach2b->cttnbp2nlb	2.49688	0.11257	0	0	0.209666	0.16345	0	0.893341	Superficial_Epithelial_0dpa
cttnbp2nlb#chr8:27846928-27847967	chr8:27846928-27847967	Body	0.096	cttnbp2nlb	MA1470.1	chr8:27847514-27847533	-0.0358142	0.128107	0.14973	bach2b	0.193379	bach2b->cttnbp2nlb	2.49688	0.11257	0	0	0.209666	0.16345	0	0.893341	Superficial_Epithelial_0dpa
CU984600.1#chr9:489227-492690	chr9:489227-492690	TSS	0	CU984600.1	MA0591.1	chr9:490903-490917	0.0879159	0.276091	0.360511	bach1b	0.0525138	bach1b->CU984600.1	1.33473	0.0555526	0	0	0.925602	0.396235	0	2.39057	Superficial_Epithelial_0dpa
CU984600.1#chr9:489227-492690	chr9:489227-492690	TSS	0	CU984600.1	MA1101.2	chr9:490637-490655	-0.135126	0.168212	1.63257	bach2b	0.0657534	bach2b->CU984600.1	6.21726	0.0923215	0	0	0.209666	0.396235	0	2.39057	Superficial_Epithelial_0dpa
CU984600.1#chr9:489227-492690	chr9:489227-492690	TSS	0	CU984600.1	MA0522.3	chr9:491666-491676	0.351051	-0.195162	0.850047	tcf3a	0.0820155	tcf3a->CU984600.1	3.32543	0.0712262	0	0	0.450357	0.396235	0	2.39057	Superficial_Epithelial_0dpa
CU984600.1#chr9:489227-492690	chr9:489227-492690	TSS	0	CU984600.1	MA0522.3	chr9:491098-491108	-0.0899474	-0.0176774	0.225746	tcf3a	0.0820155	tcf3a->CU984600.1	3.32543	0.0712262	0	0	0.450357	0.396235	0	2.39057	Superficial_Epithelial_0dpa
CU984600.1#chr9:489227-492690	chr9:489227-492690	TSS	0	CU984600.1	MA0522.3	chr9:491249-491259	-0.191819	0.101757	0.239778	tcf3a	0.0820155	tcf3a->CU984600.1	3.32543	0.0712262	0	0	0.450357	0.396235	0	2.39057	Superficial_Epithelial_0dpa
CU984600.1#chr9:489227-492690	chr9:489227-492690	TSS	0	CU984600.1	MA1633.2	chr9:490642-490650	-0.601358	1.20598	2.27056	bach1b	0.0601907	bach1b->CU984600.1	1.33473	0.0555526	0	0	0.925602	0.396235	0	2.39057	Superficial_Epithelial_0dpa
CU984600.2#chr9:560559-562248	chr9:560559-562248	Inter	0.074	CU984600.2	MA0517.1	chr9:561677-561691	-0.0257812	0.220928	0.263876	stat1a	0.0569912	stat1a->CU984600.2	25.3864	0.151515	0	0	1.21024	1.23071	0	1.64097	Superficial_Epithelial_0dpa
CU984600.2#chr9:560559-562248	chr9:560559-562248	Inter	0.074	CU984600.2	MA0517.1	chr9:561677-561691	-0.0257812	0.220928	0.263876	stat1b	0.151583	stat1b->CU984600.2	53.1535	0.201275	0	0	0.572188	1.23071	0	1.64097	Superficial_Epithelial_0dpa
CU984600.2#chr9:560559-562248	chr9:560559-562248	Inter	0.074	CU984600.2	MA0653.1	chr9:561646-561660	0.0639817	0.0736533	0.0951031	irf9	0.0507077	irf9->CU984600.2	3.95151	0.0818945	0	0	0.4291	1.23071	0	1.64097	Superficial_Epithelial_0dpa
cul1b#chr24:17399171-17400680	chr24:17399171-17400680	TSS	0	cul1b	MA0851.1	chr24:17399618-17399634	-0.0419956	0.146668	0.00939477	foxj3	0.0770929	foxj3->cul1b	2.11379	0.0347356	0	0	0.643544	0.911455	0	1.54796	Superficial_Epithelial_0dpa
cx43.4#chr9:46432569-46433617	chr9:46432569-46433617	Inter	0.059	cx43.4	MA1515.1	chr9:46433330-46433340	-0.043578	0.0488925	0.0622275	klf2b	0.107486	klf2b->cx43.4	8.81272	0.107125	0	0	1.42664	1.61471	0	3.53765	Superficial_Epithelial_0dpa
cxcl14#chr14:24426309-24427869	chr14:24426309-24427869	Inter	0.056	cxcl14	MA1101.2	chr14:24427192-24427210	-0.131463	0.252733	0.406986	bach2b	0.0657534	bach2b->cxcl14	1.95699	0.125206	0	0	0.209666	0.033595	0	0.554496	Superficial_Epithelial_0dpa
cxcl14#chr14:24426309-24427869	chr14:24426309-24427869	Inter	0.056	cxcl14	MA1101.2	chr14:24427192-24427210	-0.131463	0.252733	0.406986	bach2b	0.0657534	bach2b->cxcl14	1.95699	0.125206	0	0	0.209666	0.033595	0	0.554496	Superficial_Epithelial_0dpa
cycsb#chr6:10911941-10913630	chr6:10911941-10913630	TSS	0	cycsb	MA0522.3	chr6:10913363-10913373	-0.129033	0.231131	0.0518434	tcf3a	0.0820155	tcf3a->cycsb	2.97854	0.0643519	0	0	0.450357	0.827208	0	1.96206	Superficial_Epithelial_0dpa
cyp8b3#chr2:3443995-3445665	chr2:3443995-3445665	Inter	0.056	cyp8b3	MA0609.2	chr2:3444944-3444959	-0.0383359	0.102028	0.0245919	crema	0.0998319	crema->cyp8b3	2.01094	0.0314067	0	0	1.34056	0.904725	0	1.50005	Superficial_Epithelial_0dpa
cyp8b3#chr2:3443995-3445665	chr2:3443995-3445665	Inter	0.056	cyp8b3	MA0609.2	chr2:3444944-3444959	-0.0383359	0.102028	0.0245919	crema	0.0998319	crema->cyp8b3	2.01094	0.0314067	0	0	1.34056	0.904725	0	1.50005	Superficial_Epithelial_0dpa
daam1b#chr20:21928428-21929313	chr20:21928428-21929313	Body	0.099	daam1b	MA1515.1	chr20:21928656-21928666	-0.307478	0.354619	0.691365	klf2b	0.107486	klf2b->daam1b	1.22918	0.0600441	0	0	1.42664	0.780079	0	2.97547	Superficial_Epithelial_0dpa
daam1b#chr20:21934667-21936891	chr20:21934667-21936891	Body	0.093	daam1b	MA1515.1	chr20:21935292-21935302	-0.0549957	0.236475	0.16348	klf2b	0.107486	klf2b->daam1b	1.22918	0.0600441	0	0	1.42664	0.780079	0	1.68281	Superficial_Epithelial_0dpa
daam1b#chr20:21934667-21936891	chr20:21934667-21936891	Body	0.093	daam1b	MA1515.1	chr20:21935382-21935392	0.0586391	0.0348502	0.0966145	klf2b	0.107486	klf2b->daam1b	1.22918	0.0600441	0	0	1.42664	0.780079	0	1.68281	Superficial_Epithelial_0dpa
dapk3#chr2:37477066-37478783	chr2:37477066-37478783	TSS	0	dapk3	MA0746.2	chr2:37478440-37478452	0.882709	-0.0721018	1.91692	sp3b	0.0712338	sp3b->dapk3	3.64566	0.0310528	0	0	0.0996294	0.246852	0	1.38994	Superficial_Epithelial_0dpa
dapp1#chr13:12456058-12457443	chr13:12456058-12457443	TSS	0	dapp1	MA1133.1	chr13:12457195-12457206	0.070756	0.183006	0.0170268	jun	0.05518	jun->dapp1	1.65574	0.0755858	0	0	2.12638	0.304818	0	4.95535	Superficial_Epithelial_0dpa
dapp1#chr13:12456058-12457443	chr13:12456058-12457443	TSS	0	dapp1	MA0598.3	chr13:12457257-12457271	-0.120197	0.276781	0.112264	ehf	0.0681254	ehf->dapp1	2.30549	0.06108	0	0	0.212191	0.304818	0	4.95535	Superficial_Epithelial_0dpa
dapp1#chr13:12456058-12457443	chr13:12456058-12457443	TSS	0	dapp1	MA0640.2	chr13:12457256-12457269	-0.0879971	0.248858	0.0777313	elf3	0.0502292	elf3->dapp1	1.1056	0.0576321	0	0	1.46398	0.304818	0	4.95535	Superficial_Epithelial_0dpa
daxx#chr19:7032672-7034105	chr19:7032672-7034105	TSS	0	daxx	MA1128.1	chr19:7033068-7033080	0.0227331	0.0461656	0.215161	fosl1a	0.122265	fosl1a->daxx	4.87112	0.0671964	0	0	2.74651	0.398977	0	1.67983	Superficial_Epithelial_0dpa
daxx#chr19:7032672-7034105	chr19:7032672-7034105	TSS	0	daxx	MA0089.2	chr19:7033066-7033081	0.0554241	0.040275	0.135831	nfe2l1a	0.0627577	nfe2l1a->daxx	3.73304	0.0610639	0	0	1.05576	0.398977	0	1.67983	Superficial_Epithelial_0dpa
daxx#chr19:7032672-7034105	chr19:7032672-7034105	TSS	0	daxx	MA0522.3	chr19:7033844-7033854	-0.309699	0.332145	0.355174	tcf3a	0.0820155	tcf3a->daxx	2.99244	0.0556849	0	0	0.450357	0.398977	0	1.67983	Superficial_Epithelial_0dpa
dbpb#chr16:13612700-13614537	chr16:13612700-13614537	TSS	0	dbpb	MA0656.1	chr16:13613479-13613490	-2.16768	2.95076	3.13145	jdp2b	0.138912	jdp2b->dbpb	2.86914	0.0743792	0	0	1.27829	0.769336	0	2.01978	Superficial_Epithelial_0dpa
dbpb#chr16:13612700-13614537	chr16:13612700-13614537	TSS	0	dbpb	MA0656.1	chr16:13613479-13613490	-2.16768	2.95076	3.13145	jdp2b	0.138912	jdp2b->dbpb	2.86914	0.0743792	0	0	1.27829	0.769336	0	2.01978	Superficial_Epithelial_0dpa
dbpb#chr16:13612700-13614537	chr16:13612700-13614537	TSS	0	dbpb	MA0464.2	chr16:13613475-13613484	-0.844496	1.86325	0.703152	bhlhe40	0.0593062	bhlhe40->dbpb	8.24237	0.0835505	0	0	1.1581	0.769336	0	2.01978	Superficial_Epithelial_0dpa
dbpb#chr16:13612700-13614537	chr16:13612700-13614537	TSS	0	dbpb	MA0464.2	chr16:13613475-13613484	-0.844496	1.86325	0.703152	bhlhe40	0.0593062	bhlhe40->dbpb	8.24237	0.0835505	0	0	1.1581	0.769336	0	2.01978	Superficial_Epithelial_0dpa
dcaf12#chr21:11883207-11886306	chr21:11883207-11886306	TSS	0	dcaf12	MA0478.1	chr21:11884013-11884023	0.495546	-0.763364	0.970442	fosl2	0.0934041	fosl2->dcaf12	1.87536	0.067806	0	0	1.62846	0.54747	0	1.97661	Superficial_Epithelial_0dpa
dcaf12#chr21:11883207-11886306	chr21:11883207-11886306	TSS	0	dcaf12	MA0591.1	chr21:11884012-11884026	0.431121	-0.402192	0.781596	bach1b	0.0525138	bach1b->dcaf12	6.5027	0.093601	0	0	0.925602	0.54747	0	1.97661	Superficial_Epithelial_0dpa
dcaf12#chr21:11883207-11886306	chr21:11883207-11886306	TSS	0	dcaf12	MA0105.4	chr21:11885552-11885564	-0.0494676	0.129095	0.0988583	nfkb1	0.0579096	nfkb1->dcaf12	2.46506	0.0614196	0	0	0.49176	0.54747	0	1.97661	Superficial_Epithelial_0dpa
dcaf12#chr21:11883207-11886306	chr21:11883207-11886306	TSS	0	dcaf12	MA0105.4	chr21:11885552-11885564	-0.0494676	0.129095	0.0988583	nfkb1	0.0579096	nfkb1->dcaf12	2.46506	0.0614196	0	0	0.49176	0.54747	0	1.97661	Superficial_Epithelial_0dpa
dcaf12#chr21:11883207-11886306	chr21:11883207-11886306	TSS	0	dcaf12	MA1128.1	chr21:11884013-11884025	0.454455	-0.343214	0.827549	fosl1a	0.122265	fosl1a->dcaf12	2.51341	0.0661206	0	0	2.74651	0.54747	0	1.97661	Superficial_Epithelial_0dpa
dcaf12#chr21:11883207-11886306	chr21:11883207-11886306	TSS	0	dcaf12	MA1130.1	chr21:11884013-11884024	0.45425	-0.567468	0.908459	fosl2	0.0837069	fosl2->dcaf12	1.87536	0.067806	0	0	1.62846	0.54747	0	1.97661	Superficial_Epithelial_0dpa
dcaf12#chr21:11883207-11886306	chr21:11883207-11886306	TSS	0	dcaf12	MA1137.1	chr21:11884013-11884025	0.454455	-0.343214	0.827549	fosl1a	0.123797	fosl1a->dcaf12	2.51341	0.0661206	0	0	2.74651	0.54747	0	1.97661	Superficial_Epithelial_0dpa
dcaf12#chr21:11883207-11886306	chr21:11883207-11886306	TSS	0	dcaf12	MA0477.2	chr21:11884013-11884025	0.454455	-0.343214	0.827549	fosl1a	0.126437	fosl1a->dcaf12	2.51341	0.0661206	0	0	2.74651	0.54747	0	1.97661	Superficial_Epithelial_0dpa
dclre1c#chr4:9609067-9610512	chr4:9609067-9610512	TSS	0	dclre1c	MA0481.3	chr4:9609284-9609294	-0.107876	0.153572	0.11479	foxp1b	0.0976319	foxp1b->dclre1c	1.36513	0.0801547	0	0	0.0287816	0.0351932	0	1.08926	Superficial_Epithelial_0dpa
ddit3#chr6:58915070-58917135	chr6:58915070-58917135	TSS	0	ddit3	MA0101.1	chr6:58915872-58915881	0.167969	0.152548	0.670711	rel	0.0845928	rel->ddit3	7.90373	0.086456	0	0	0.777053	1.36213	0	1.96804	Superficial_Epithelial_0dpa
ddit3#chr6:58915070-58917135	chr6:58915070-58917135	TSS	0	ddit3	MA0772.1	chr6:58917099-58917112	-0.117113	0.0836193	0.106457	irf7	0.0852944	irf7->ddit3	1.32893	0.0455854	0	0	0.785997	1.36213	0	1.96804	Superficial_Epithelial_0dpa
ddit3#chr6:58915070-58917135	chr6:58915070-58917135	TSS	0	ddit3	MA0840.1	chr6:58916547-58916558	-0.0018909	0.639007	0.179128	creb5b	0.128114	creb5b->ddit3	1.56322	0.0610046	0	0	0.361049	1.36213	0	1.96804	Superficial_Epithelial_0dpa
ddit3#chr6:58915070-58917135	chr6:58915070-58917135	TSS	0	ddit3	MA0840.1	chr6:58916547-58916558	-0.0018909	0.639007	0.179128	creb5b	0.128114	creb5b->ddit3	1.56322	0.0610046	0	0	0.361049	1.36213	0	1.96804	Superficial_Epithelial_0dpa
ddit3#chr6:58915070-58917135	chr6:58915070-58917135	TSS	0	ddit3	MA1126.1	chr6:58916543-58916558	-0.0160606	0.48375	0.275215	fosab	0.10646	fosab->ddit3	23.5716	0.145075	0	0	2.65236	1.36213	0	1.96804	Superficial_Epithelial_0dpa
ddit3#chr6:58915070-58917135	chr6:58915070-58917135	TSS	0	ddit3	MA1127.1	chr6:58916547-58916557	0.1492	0.542508	-0.0298805	fosb	0.150449	fosb->ddit3	7.42121	0.0915084	0	0	2.01852	1.36213	0	1.96804	Superficial_Epithelial_0dpa
ddit3#chr6:58915070-58917135	chr6:58915070-58917135	TSS	0	ddit3	MA1127.1	chr6:58916548-58916558	-0.0020628	0.681737	0.171803	fosb	0.150449	fosb->ddit3	7.42121	0.0915084	0	0	2.01852	1.36213	0	1.96804	Superficial_Epithelial_0dpa
ddit3#chr6:58915070-58917135	chr6:58915070-58917135	TSS	0	ddit3	MA1129.1	chr6:58916548-58916557	0.16412	0.572882	-0.174655	jun	0.0526979	jun->ddit3	30.5511	0.151086	0	0	2.12638	1.36213	0	1.96804	Superficial_Epithelial_0dpa
ddit3#chr6:58915070-58917135	chr6:58915070-58917135	TSS	0	ddit3	MA1129.1	chr6:58916548-58916557	0.16412	0.572882	-0.174655	jun	0.0526979	jun->ddit3	30.5511	0.151086	0	0	2.12638	1.36213	0	1.96804	Superficial_Epithelial_0dpa
ddit3#chr6:58915070-58917135	chr6:58915070-58917135	TSS	0	ddit3	MA1131.1	chr6:58916547-58916557	0.1492	0.542508	-0.0298805	fosl2	0.0630162	fosl2->ddit3	4.52556	0.0666175	0	0	1.62846	1.36213	0	1.96804	Superficial_Epithelial_0dpa
ddit3#chr6:58915070-58917135	chr6:58915070-58917135	TSS	0	ddit3	MA1131.1	chr6:58916548-58916558	-0.0020628	0.681737	0.171803	fosl2	0.0630162	fosl2->ddit3	4.52556	0.0666175	0	0	1.62846	1.36213	0	1.96804	Superficial_Epithelial_0dpa
ddit3#chr6:58915070-58917135	chr6:58915070-58917135	TSS	0	ddit3	MA1133.1	chr6:58916547-58916558	-0.0018909	0.639007	0.179128	jun	0.05518	jun->ddit3	30.5511	0.151086	0	0	2.12638	1.36213	0	1.96804	Superficial_Epithelial_0dpa
ddit3#chr6:58915070-58917135	chr6:58915070-58917135	TSS	0	ddit3	MA1133.1	chr6:58916547-58916558	-0.0018909	0.639007	0.179128	junbb	0.090798	junbb->ddit3	5.88537	0.092176	0	0	1.09612	1.36213	0	1.96804	Superficial_Epithelial_0dpa
ddit3#chr6:58915070-58917135	chr6:58915070-58917135	TSS	0	ddit3	MA1133.1	chr6:58916547-58916558	-0.0018909	0.639007	0.179128	jun	0.05518	jun->ddit3	30.5511	0.151086	0	0	2.12638	1.36213	0	1.96804	Superficial_Epithelial_0dpa
ddit3#chr6:58915070-58917135	chr6:58915070-58917135	TSS	0	ddit3	MA1133.1	chr6:58916547-58916558	-0.0018909	0.639007	0.179128	junbb	0.090798	junbb->ddit3	5.88537	0.092176	0	0	1.09612	1.36213	0	1.96804	Superficial_Epithelial_0dpa
ddit3#chr6:58915070-58917135	chr6:58915070-58917135	TSS	0	ddit3	MA1136.1	chr6:58916548-58916557	0.16412	0.572882	-0.174655	fosb	0.133295	fosb->ddit3	7.42121	0.0915084	0	0	2.01852	1.36213	0	1.96804	Superficial_Epithelial_0dpa
ddit3#chr6:58915070-58917135	chr6:58915070-58917135	TSS	0	ddit3	MA1136.1	chr6:58916548-58916557	0.16412	0.572882	-0.174655	junbb	0.0827228	junbb->ddit3	5.88537	0.092176	0	0	1.09612	1.36213	0	1.96804	Superficial_Epithelial_0dpa
ddit3#chr6:58915070-58917135	chr6:58915070-58917135	TSS	0	ddit3	MA1136.1	chr6:58916548-58916557	0.16412	0.572882	-0.174655	junba	0.0510403	junba->ddit3	1.27253	0.0523214	0	0	1.93563	1.36213	0	1.96804	Superficial_Epithelial_0dpa
ddit3#chr6:58915070-58917135	chr6:58915070-58917135	TSS	0	ddit3	MA1136.1	chr6:58916548-58916557	0.16412	0.572882	-0.174655	fosb	0.133295	fosb->ddit3	7.42121	0.0915084	0	0	2.01852	1.36213	0	1.96804	Superficial_Epithelial_0dpa
ddit3#chr6:58915070-58917135	chr6:58915070-58917135	TSS	0	ddit3	MA1136.1	chr6:58916548-58916557	0.16412	0.572882	-0.174655	junbb	0.0827228	junbb->ddit3	5.88537	0.092176	0	0	1.09612	1.36213	0	1.96804	Superficial_Epithelial_0dpa
ddit3#chr6:58915070-58917135	chr6:58915070-58917135	TSS	0	ddit3	MA1136.1	chr6:58916548-58916557	0.16412	0.572882	-0.174655	junba	0.0510403	junba->ddit3	1.27253	0.0523214	0	0	1.93563	1.36213	0	1.96804	Superficial_Epithelial_0dpa
ddit3#chr6:58915070-58917135	chr6:58915070-58917135	TSS	0	ddit3	MA1139.1	chr6:58916547-58916558	-0.0018909	0.639007	0.179128	fosl2	0.0569617	fosl2->ddit3	4.52556	0.0666175	0	0	1.62846	1.36213	0	1.96804	Superficial_Epithelial_0dpa
ddit3#chr6:58915070-58917135	chr6:58915070-58917135	TSS	0	ddit3	MA1139.1	chr6:58916547-58916558	-0.0018909	0.639007	0.179128	junbb	0.0817679	junbb->ddit3	5.88537	0.092176	0	0	1.09612	1.36213	0	1.96804	Superficial_Epithelial_0dpa
ddit3#chr6:58915070-58917135	chr6:58915070-58917135	TSS	0	ddit3	MA1139.1	chr6:58916547-58916558	-0.0018909	0.639007	0.179128	fosl2	0.0569617	fosl2->ddit3	4.52556	0.0666175	0	0	1.62846	1.36213	0	1.96804	Superficial_Epithelial_0dpa
ddit3#chr6:58915070-58917135	chr6:58915070-58917135	TSS	0	ddit3	MA1139.1	chr6:58916547-58916558	-0.0018909	0.639007	0.179128	junbb	0.0817679	junbb->ddit3	5.88537	0.092176	0	0	1.09612	1.36213	0	1.96804	Superficial_Epithelial_0dpa
ddit3#chr6:58915070-58917135	chr6:58915070-58917135	TSS	0	ddit3	MA1140.2	chr6:58916547-58916558	-0.0018909	0.639007	0.179128	junbb	0.0902616	junbb->ddit3	5.88537	0.092176	0	0	1.09612	1.36213	0	1.96804	Superficial_Epithelial_0dpa
ddit3#chr6:58915070-58917135	chr6:58915070-58917135	TSS	0	ddit3	MA1140.2	chr6:58916547-58916558	-0.0018909	0.639007	0.179128	junbb	0.0902616	junbb->ddit3	5.88537	0.092176	0	0	1.09612	1.36213	0	1.96804	Superficial_Epithelial_0dpa
ddit3#chr6:58915070-58917135	chr6:58915070-58917135	TSS	0	ddit3	MA1951.1	chr6:58916546-58916559	0.0896832	0.581428	0.057374	fosab	0.154414	fosab->ddit3	23.5716	0.145075	0	0	2.65236	1.36213	0	1.96804	Superficial_Epithelial_0dpa
ddit3#chr6:58915070-58917135	chr6:58915070-58917135	TSS	0	ddit3	MA1951.1	chr6:58916546-58916559	0.0896832	0.581428	0.057374	fosab	0.154414	fosab->ddit3	23.5716	0.145075	0	0	2.65236	1.36213	0	1.96804	Superficial_Epithelial_0dpa
ddr1#chr16:21587520-21589031	chr16:21587520-21589031	Body	0.119	ddr1	MA0073.1	chr16:21588544-21588563	-0.0991412	0.100483	0.191828	rreb1a	0.0500665	rreb1a->ddr1	1.33488	0.0527653	0	0	0.266798	0.0657703	0	0.508289	Superficial_Epithelial_0dpa
ddr1#chr16:21587520-21589031	chr16:21587520-21589031	Body	0.119	ddr1	MA0073.1	chr16:21588546-21588565	-0.0690721	0.0684312	0.158503	rreb1a	0.0500665	rreb1a->ddr1	1.33488	0.0527653	0	0	0.266798	0.0657703	0	0.508289	Superficial_Epithelial_0dpa
ddr1#chr16:21587520-21589031	chr16:21587520-21589031	Body	0.119	ddr1	MA0073.1	chr16:21588548-21588567	-0.0478049	0.0362674	0.135738	rreb1a	0.0500665	rreb1a->ddr1	1.33488	0.0527653	0	0	0.266798	0.0657703	0	0.508289	Superficial_Epithelial_0dpa
ddr1#chr16:21587520-21589031	chr16:21587520-21589031	Body	0.119	ddr1	MA0073.1	chr16:21588550-21588569	-0.0323051	0.0107234	0.118032	rreb1a	0.0500665	rreb1a->ddr1	1.33488	0.0527653	0	0	0.266798	0.0657703	0	0.508289	Superficial_Epithelial_0dpa
ddr1#chr16:21587520-21589031	chr16:21587520-21589031	Body	0.119	ddr1	MA0073.1	chr16:21588552-21588571	-0.0343022	0.0114975	0.127732	rreb1a	0.0500665	rreb1a->ddr1	1.33488	0.0527653	0	0	0.266798	0.0657703	0	0.508289	Superficial_Epithelial_0dpa
ddr1#chr16:21587520-21589031	chr16:21587520-21589031	Body	0.119	ddr1	MA0840.1	chr16:21588596-21588607	0.0384116	0.13902	0.00978354	creb5b	0.128114	creb5b->ddr1	2.02034	0.122097	0	0	0.361049	0.0657703	0	0.508289	Superficial_Epithelial_0dpa
ddr1#chr16:21587520-21589031	chr16:21587520-21589031	Body	0.119	ddr1	MA1136.1	chr16:21588597-21588606	0.0253746	0.122205	-0.00433519	junba	0.0510403	junba->ddr1	1.26778	0.0568482	0	0	1.93563	0.0657703	0	0.508289	Superficial_Epithelial_0dpa
ddr1#chr16:21587520-21589031	chr16:21587520-21589031	Body	0.119	ddr1	MA1136.1	chr16:21588597-21588606	0.0253746	0.122205	-0.00433519	junba	0.0510403	junba->ddr1	1.26778	0.0568482	0	0	1.93563	0.0657703	0	0.508289	Superficial_Epithelial_0dpa
ddr1#chr16:21602895-21603990	chr16:21602895-21603990	Body	0.191	ddr1	MA1101.2	chr16:21603285-21603303	-0.0513895	0.0700114	0.0642551	bach2b	0.0657534	bach2b->ddr1	6.5545	0.168785	0	0	0.209666	0.0657703	0	0.269299	Superficial_Epithelial_0dpa
ddr1#chr16:21602895-21603990	chr16:21602895-21603990	Body	0.191	ddr1	MA1101.2	chr16:21603285-21603303	-0.0513895	0.0700114	0.0642551	bach2b	0.0657534	bach2b->ddr1	6.5545	0.168785	0	0	0.209666	0.0657703	0	0.269299	Superficial_Epithelial_0dpa
dedd1#chr16:10840769-10842013	chr16:10840769-10842013	TSS	0	dedd1	MA0464.2	chr16:10841635-10841644	-1.51465	1.27643	2.19423	bhlhe40	0.0593062	bhlhe40->dedd1	1.53605	0.0639019	0	0	1.1581	1.70947	0	1.45906	Superficial_Epithelial_0dpa
dedd1#chr16:10840769-10842013	chr16:10840769-10842013	TSS	0	dedd1	MA0464.2	chr16:10841635-10841644	-1.51465	1.27643	2.19423	bhlhe40	0.0593062	bhlhe40->dedd1	1.53605	0.0639019	0	0	1.1581	1.70947	0	1.45906	Superficial_Epithelial_0dpa
dedd1#chr16:10840769-10842013	chr16:10840769-10842013	TSS	0	dedd1	MA1509.1	chr16:10841285-10841293	-0.186725	0.4743	0.141968	irf6	0.0899394	irf6->dedd1	11.5862	0.102921	0	0	0.476886	1.70947	0	1.45906	Superficial_Epithelial_0dpa
def8#chr18:31279694-31282204	chr18:31279694-31282204	TSS	0	def8	MA1527.1	chr18:31281318-31281334	-0.0334329	0.0146295	0.114187	nfic	0.072754	nfic->def8	4.54618	0.0887934	0	0	0.510769	0.397101	0	1.18135	Superficial_Epithelial_0dpa
degs2#chr17:30893931-30895336	chr17:30893931-30895336	TSS	0	degs2	MA1131.1	chr17:30894795-30894805	-0.0389676	0.0374747	0.0733203	fosl2	0.0630162	fosl2->degs2	1.7497	0.0555498	0	0	1.62846	1.42682	0	3.16926	Superficial_Epithelial_0dpa
dennd2b#chr7:28547058-28549784	chr7:28547058-28549784	Body	0.219	dennd2b	MA0600.2	chr7:28549546-28549561	-0.043069	0.0551718	0.056271	rfx2	0.076513	rfx2->dennd2b	1.37822	0.119457	0	0	0.545874	0.138418	0	0.243162	Superficial_Epithelial_0dpa
dennd2b#chr7:28547058-28549784	chr7:28547058-28549784	Body	0.219	dennd2b	MA1101.2	chr7:28547479-28547497	-0.12862	0.193287	0.236071	bach2b	0.0657534	bach2b->dennd2b	45.9031	0.355197	0	0	0.209666	0.138418	0	0.243162	Superficial_Epithelial_0dpa
dennd2b#chr7:28547058-28549784	chr7:28547058-28549784	Body	0.219	dennd2b	MA1101.2	chr7:28547479-28547497	-0.12862	0.193287	0.236071	bach2b	0.0657534	bach2b->dennd2b	45.9031	0.355197	0	0	0.209666	0.138418	0	0.243162	Superficial_Epithelial_0dpa
dennd2b#chr7:28547058-28549784	chr7:28547058-28549784	TSS	0.219	dennd2b	MA0600.2	chr7:28549546-28549561	-0.043069	0.0551718	0.056271	rfx2	0.076513	rfx2->dennd2b	1.37822	0.119457	0	0	0.545874	0.138418	0	0.243162	Superficial_Epithelial_0dpa
dennd2b#chr7:28547058-28549784	chr7:28547058-28549784	TSS	0.219	dennd2b	MA1101.2	chr7:28547479-28547497	-0.12862	0.193287	0.236071	bach2b	0.0657534	bach2b->dennd2b	45.9031	0.355197	0	0	0.209666	0.138418	0	0.243162	Superficial_Epithelial_0dpa
dennd2b#chr7:28547058-28549784	chr7:28547058-28549784	TSS	0.219	dennd2b	MA1101.2	chr7:28547479-28547497	-0.12862	0.193287	0.236071	bach2b	0.0657534	bach2b->dennd2b	45.9031	0.355197	0	0	0.209666	0.138418	0	0.243162	Superficial_Epithelial_0dpa
dennd2c#chr8:11064458-11065698	chr8:11064458-11065698	Body	0.062	dennd2c	MA1101.2	chr8:11065154-11065172	-0.070808	0.114042	0.102628	bach2b	0.0657534	bach2b->dennd2c	10.5554	0.123483	0	0	0.209666	0.304947	0	0.800276	Superficial_Epithelial_0dpa
deptor#chr16:14588063-14589091	chr16:14588063-14589091	Body	0.087	deptor	MA1131.1	chr16:14588518-14588528	-0.0962064	0.0349888	0.564035	fosl2	0.0630162	fosl2->deptor	2.13677	0.0488936	0	0	1.62846	0.7127	0	2.3479	Superficial_Epithelial_0dpa
deptor#chr16:14588063-14589091	chr16:14588063-14589091	Body	0.087	deptor	MA1139.1	chr16:14588518-14588529	-0.0233179	-0.0198648	0.346202	fosl2	0.0569617	fosl2->deptor	2.13677	0.0488936	0	0	1.62846	0.7127	0	2.3479	Superficial_Epithelial_0dpa
deptor#chr16:14588063-14589091	chr16:14588063-14589091	Body	0.087	deptor	MA1139.1	chr16:14588518-14588529	-0.0233179	-0.0198648	0.346202	fosl2	0.0569617	fosl2->deptor	2.13677	0.0488936	0	0	1.62846	0.7127	0	2.3479	Superficial_Epithelial_0dpa
deptor#chr16:14588063-14589091	chr16:14588063-14589091	TSS	0.087	deptor	MA1131.1	chr16:14588518-14588528	-0.0962064	0.0349888	0.564035	fosl2	0.0630162	fosl2->deptor	2.13677	0.0488936	0	0	1.62846	0.7127	0	2.3479	Superficial_Epithelial_0dpa
deptor#chr16:14588063-14589091	chr16:14588063-14589091	TSS	0.087	deptor	MA1139.1	chr16:14588518-14588529	-0.0233179	-0.0198648	0.346202	fosl2	0.0569617	fosl2->deptor	2.13677	0.0488936	0	0	1.62846	0.7127	0	2.3479	Superficial_Epithelial_0dpa
deptor#chr16:14588063-14589091	chr16:14588063-14589091	TSS	0.087	deptor	MA1139.1	chr16:14588518-14588529	-0.0233179	-0.0198648	0.346202	fosl2	0.0569617	fosl2->deptor	2.13677	0.0488936	0	0	1.62846	0.7127	0	2.3479	Superficial_Epithelial_0dpa
dffb#chr8:22276918-22277908	chr8:22276918-22277908	TSS	0	dffb	MA1648.1	chr8:22277135-22277145	-0.163749	0.580582	-0.160453	tcf12	0.0500565	tcf12->dffb	2.98379	0.0582187	0	0	0.112757	0.010043	0	1.47814	Superficial_Epithelial_0dpa
dgkza#chr7:38961575-38962986	chr7:38961575-38962986	Body	0.051	dgkza	MA1527.1	chr7:38962871-38962887	-0.132677	0.244008	0.152313	nfic	0.072754	nfic->dgkza	1.52999	0.0795261	0	0	0.510769	0.98139	0	1.78836	Superficial_Epithelial_0dpa
dgkza#chr7:38961575-38962986	chr7:38961575-38962986	TSS	0.051	dgkza	MA1527.1	chr7:38962871-38962887	-0.132677	0.244008	0.152313	nfic	0.072754	nfic->dgkza	1.52999	0.0795261	0	0	0.510769	0.98139	0	1.78836	Superficial_Epithelial_0dpa
dgkzb#chr25:7784285-7785349	chr25:7784285-7785349	TSS	0	dgkzb	MA0598.3	chr25:7784736-7784750	-0.23227	0.443143	0.268543	ehf	0.0681254	ehf->dgkzb	1.43001	0.0701886	0	0	0.212191	0.393806	0	2.17273	Superficial_Epithelial_0dpa
dgkzb#chr25:7784285-7785349	chr25:7784285-7785349	TSS	0	dgkzb	MA0598.3	chr25:7784820-7784834	0.00863713	0.261021	0.131623	ehf	0.0681254	ehf->dgkzb	1.43001	0.0701886	0	0	0.212191	0.393806	0	2.17273	Superficial_Epithelial_0dpa
dgkzb#chr25:7784285-7785349	chr25:7784285-7785349	TSS	0	dgkzb	MA0685.2	chr25:7784624-7784632	-0.571489	1.43038	0.66682	sp4	0.0623666	sp4->dgkzb	6.08631	0.0539673	0	0	0.100349	0.393806	0	2.17273	Superficial_Epithelial_0dpa
dhrs13l1#chr14:4150828-4151844	chr14:4150828-4151844	TSS	0	dhrs13l1	MA0144.2	chr14:4151515-4151525	-0.139403	0.146116	0.240066	stat3	0.0671814	stat3->dhrs13l1	9.12648	0.0884584	0	0	0.981733	0.289797	0	1.8083	Superficial_Epithelial_0dpa
dhrs13l1#chr14:4150828-4151844	chr14:4150828-4151844	TSS	0	dhrs13l1	MA0050.3	chr14:4151045-4151059	-0.0530914	0.0575109	0.130774	irf1b	0.108859	irf1b->dhrs13l1	8.92088	0.0344678	0	0	0.586434	0.289797	0	1.8083	Superficial_Epithelial_0dpa
diaph2#chr14:39230156-39231396	chr14:39230156-39231396	Inter	0.214	diaph2	MA0058.3	chr14:39230474-39230483	-0.729986	1.17449	1.04411	max	0.0781341	max->diaph2	1.67769	0.113173	0	0	0.485417	0.43873	0	0.690007	Superficial_Epithelial_0dpa
diaph2#chr14:39230156-39231396	chr14:39230156-39231396	Inter	0.214	diaph2	MA0147.3	chr14:39230473-39230484	-0.567923	0.899795	1.00625	myca	0.0687634	myca->diaph2	5.89532	0.148478	0	0	0.0350607	0.43873	0	0.690007	Superficial_Epithelial_0dpa
dido1#chr11:18555650-18557677	chr11:18555650-18557677	TSS	0	dido1	MA1129.1	chr11:18556313-18556322	-0.220495	0.145551	0.163176	jun	0.0526979	jun->dido1	1.37189	0.0579681	0	0	2.12638	0.433452	0	1.55103	Superficial_Epithelial_0dpa
dido1#chr11:18555650-18557677	chr11:18555650-18557677	TSS	0	dido1	MA1129.1	chr11:18556313-18556322	-0.220495	0.145551	0.163176	jun	0.0526979	jun->dido1	1.37189	0.0579681	0	0	2.12638	0.433452	0	1.55103	Superficial_Epithelial_0dpa
dido1#chr11:18555650-18557677	chr11:18555650-18557677	TSS	0	dido1	MA1133.1	chr11:18556312-18556323	-0.212843	0.130552	0.160889	jun	0.05518	jun->dido1	1.37189	0.0579681	0	0	2.12638	0.433452	0	1.55103	Superficial_Epithelial_0dpa
dlg1#chr6:29897723-29898623	chr6:29897723-29898623	Body	0.05	dlg1	MA0517.1	chr6:29897849-29897863	-0.0349033	0.0338411	0.0670463	stat1b	0.151583	stat1b->dlg1	1.08491	0.0672769	0	0	0.572188	1.55593	0	2.89846	Superficial_Epithelial_0dpa
dlg1#chr6:29860540-29861951	chr6:29860540-29861951	TSS	0	dlg1	MA0606.2	chr6:29861136-29861147	-0.0452777	0.192968	-0.00985447	nfat5b	0.0631327	nfat5b->dlg1	3.7509	0.0760888	0	0	0.125666	1.55593	0	1.39573	Superficial_Epithelial_0dpa
dlg3#chr14:33093788-33096568	chr14:33093788-33096568	TSS	0	dlg3	MA0851.1	chr14:33095630-33095646	-0.119563	0.115013	0.291896	foxj3	0.0770929	foxj3->dlg3	1.81148	0.074396	0	0	0.643544	0.174326	0	1.75849	Superficial_Epithelial_0dpa
dlg5a#chr13:16341927-16343518	chr13:16341927-16343518	TSS	0	dlg5a	MA0656.1	chr13:16342324-16342335	-0.14259	0.0891065	0.240152	jdp2b	0.138912	jdp2b->dlg5a	3.26081	0.10142	0	0	1.27829	0.289937	0	1.1759	Superficial_Epithelial_0dpa
dlg5a#chr13:16341927-16343518	chr13:16341927-16343518	TSS	0	dlg5a	MA1126.1	chr13:16343450-16343465	-0.0660684	0.113256	0.145384	fosab	0.10646	fosab->dlg5a	2.62418	0.0857307	0	0	2.65236	0.289937	0	1.1759	Superficial_Epithelial_0dpa
dlg5a#chr13:16341927-16343518	chr13:16341927-16343518	TSS	0	dlg5a	MA1127.1	chr13:16343450-16343460	-0.0368202	0.125093	0.119611	fosb	0.150449	fosb->dlg5a	5.31238	0.101938	0	0	2.01852	0.289937	0	1.1759	Superficial_Epithelial_0dpa
dlg5a#chr13:16341927-16343518	chr13:16341927-16343518	TSS	0	dlg5a	MA1136.1	chr13:16342325-16342334	-0.144321	0.0722967	0.254253	fosb	0.133295	fosb->dlg5a	5.31238	0.101938	0	0	2.01852	0.289937	0	1.1759	Superficial_Epithelial_0dpa
dlg5a#chr13:16341927-16343518	chr13:16341927-16343518	TSS	0	dlg5a	MA1136.1	chr13:16343451-16343460	-0.0393844	0.1255	0.131056	fosb	0.133295	fosb->dlg5a	5.31238	0.101938	0	0	2.01852	0.289937	0	1.1759	Superficial_Epithelial_0dpa
dlg5a#chr13:16341927-16343518	chr13:16341927-16343518	TSS	0	dlg5a	MA1951.1	chr13:16343449-16343462	-0.068962	0.139679	0.159941	fosab	0.154414	fosab->dlg5a	2.62418	0.0857307	0	0	2.65236	0.289937	0	1.1759	Superficial_Epithelial_0dpa
dlx2b#chr1:30978597-30981191	chr1:30978597-30981191	TSS	0	dlx2b	MA0772.1	chr1:30981144-30981157	-0.106577	0.1642	0.175439	irf7	0.0852944	irf7->dlx2b	1.23507	0.0328029	0	0	0.785997	0.00074677	0	1.09017	Superficial_Epithelial_0dpa
dlx3b#chr12:5723618-5725113	chr12:5723618-5725113	Inter	0.057	dlx3b	MA1515.1	chr12:5724469-5724479	-0.0438902	0.180437	0.217778	klf2b	0.107486	klf2b->dlx3b	18.3354	0.135279	0	0	1.42664	1.15175	0	3.71647	Superficial_Epithelial_0dpa
dmrt1#chr5:45004247-45005741	chr5:45004247-45005741	Inter	0.07	dmrt1	MA1515.1	chr5:45005164-45005174	-0.102295	0.131139	0.105138	klf2b	0.107486	klf2b->dmrt1	2.2881	0.0922992	0	0	1.42664	1.45395	0	0.775025	Superficial_Epithelial_0dpa
dnaja2a#chr7:41915145-41916610	chr7:41915145-41916610	TSS	0	dnaja2a	MA0100.3	chr7:41915515-41915524	-0.0744265	0.180698	0.0953578	myb	0.0642334	myb->dnaja2a	1.50119	0.0597043	0	0	0.170312	0.525227	0	1.58143	Superficial_Epithelial_0dpa
dnajb12a#chr13:30035298-30036402	chr13:30035298-30036402	TSS	0	dnajb12a	MA1136.1	chr13:30035857-30035866	-0.0211578	0.101319	0.0149301	junbb	0.0827228	junbb->dnajb12a	2.14715	0.0328905	0	0	1.09612	0.110211	0	1.33666	Superficial_Epithelial_0dpa
dnajb12a#chr13:30035298-30036402	chr13:30035298-30036402	TSS	0	dnajb12a	MA1136.1	chr13:30035857-30035866	-0.0211578	0.101319	0.0149301	junbb	0.0827228	junbb->dnajb12a	2.14715	0.0328905	0	0	1.09612	0.110211	0	1.33666	Superficial_Epithelial_0dpa
dnajb1b#chr1:55749010-55750547	chr1:55749010-55750547	TSS	0	dnajb1b	MA1126.1	chr1:55750286-55750301	-0.296006	1.39996	0.327357	fosab	0.10646	fosab->dnajb1b	10.9227	0.0826139	0	0	2.65236	2.76113	0	2.25883	Superficial_Epithelial_0dpa
dnajb1b#chr1:55749010-55750547	chr1:55749010-55750547	TSS	0	dnajb1b	MA1127.1	chr1:55750287-55750297	-0.362482	1.00407	0.614371	fosb	0.150449	fosb->dnajb1b	3.25117	0.0631215	0	0	2.01852	2.76113	0	2.25883	Superficial_Epithelial_0dpa
dnajb1b#chr1:55749010-55750547	chr1:55749010-55750547	TSS	0	dnajb1b	MA1129.1	chr1:55750287-55750296	-0.37118	1.03732	0.617939	jun	0.0526979	jun->dnajb1b	66.9543	0.232805	0	0	2.12638	2.76113	0	2.25883	Superficial_Epithelial_0dpa
dnajb1b#chr1:55749010-55750547	chr1:55749010-55750547	TSS	0	dnajb1b	MA1129.1	chr1:55750287-55750296	-0.37118	1.03732	0.617939	jun	0.0526979	jun->dnajb1b	66.9543	0.232805	0	0	2.12638	2.76113	0	2.25883	Superficial_Epithelial_0dpa
dnajb1b#chr1:55749010-55750547	chr1:55749010-55750547	TSS	0	dnajb1b	MA1133.1	chr1:55750286-55750297	-0.203609	1.09397	0.3682	jun	0.05518	jun->dnajb1b	66.9543	0.232805	0	0	2.12638	2.76113	0	2.25883	Superficial_Epithelial_0dpa
dnajb1b#chr1:55749010-55750547	chr1:55749010-55750547	TSS	0	dnajb1b	MA1133.1	chr1:55750286-55750297	-0.203609	1.09397	0.3682	junbb	0.090798	junbb->dnajb1b	9.34507	0.110483	0	0	1.09612	2.76113	0	2.25883	Superficial_Epithelial_0dpa
dnajb1b#chr1:55749010-55750547	chr1:55749010-55750547	TSS	0	dnajb1b	MA1136.1	chr1:55750287-55750296	-0.37118	1.03732	0.617939	fosb	0.133295	fosb->dnajb1b	3.25117	0.0631215	0	0	2.01852	2.76113	0	2.25883	Superficial_Epithelial_0dpa
dnajb1b#chr1:55749010-55750547	chr1:55749010-55750547	TSS	0	dnajb1b	MA1136.1	chr1:55750287-55750296	-0.37118	1.03732	0.617939	junbb	0.0827228	junbb->dnajb1b	9.34507	0.110483	0	0	1.09612	2.76113	0	2.25883	Superficial_Epithelial_0dpa
dnajb1b#chr1:55749010-55750547	chr1:55749010-55750547	TSS	0	dnajb1b	MA1140.2	chr1:55750286-55750297	-0.203609	1.09397	0.3682	junbb	0.0902616	junbb->dnajb1b	9.34507	0.110483	0	0	1.09612	2.76113	0	2.25883	Superficial_Epithelial_0dpa
dnajb6b#chr7:40577653-40579047	chr7:40577653-40579047	TSS	0	dnajb6b	MA0522.3	chr7:40578682-40578692	-0.39609	0.487724	0.39551	tcf3a	0.0820155	tcf3a->dnajb6b	1.31579	0.0644163	0	0	0.450357	1.05462	0	2.55785	Superficial_Epithelial_0dpa
dnajc3b#chr7:20796319-20797588	chr7:20796319-20797588	Body	0.054	dnajc3b	MA0591.1	chr7:20797205-20797219	-0.217483	0.13222	0.393363	bach1b	0.0525138	bach1b->dnajc3b	1.63314	0.0461022	0	0	0.925602	0.344223	0	1.48937	Superficial_Epithelial_0dpa
dnajc3b#chr7:20796319-20797588	chr7:20796319-20797588	Body	0.054	dnajc3b	MA1633.2	chr7:20796697-20796705	-0.247438	0.363011	0.256553	bach1b	0.0601907	bach1b->dnajc3b	1.63314	0.0461022	0	0	0.925602	0.344223	0	1.48937	Superficial_Epithelial_0dpa
dnajc3b#chr7:20796319-20797588	chr7:20796319-20797588	TSS	0.054	dnajc3b	MA0591.1	chr7:20797205-20797219	-0.217483	0.13222	0.393363	bach1b	0.0525138	bach1b->dnajc3b	1.63314	0.0461022	0	0	0.925602	0.344223	0	1.48937	Superficial_Epithelial_0dpa
dnajc3b#chr7:20796319-20797588	chr7:20796319-20797588	TSS	0.054	dnajc3b	MA1633.2	chr7:20796697-20796705	-0.247438	0.363011	0.256553	bach1b	0.0601907	bach1b->dnajc3b	1.63314	0.0461022	0	0	0.925602	0.344223	0	1.48937	Superficial_Epithelial_0dpa
dnmbp#chr12:31637870-31639776	chr12:31637870-31639776	TSS	0	dnmbp	MA0478.1	chr12:31639181-31639191	-0.0449798	0.0368586	0.0776318	fosl2	0.0934041	fosl2->dnmbp	1.0767	0.0315148	0	0	1.62846	2.17247	0	0.301857	Superficial_Epithelial_0dpa
dnmbp#chr12:31637870-31639776	chr12:31637870-31639776	TSS	0	dnmbp	MA1128.1	chr12:31639179-31639191	-0.0421087	0.0413831	0.0631185	fosl1a	0.122265	fosl1a->dnmbp	14.8204	0.100103	0	0	2.74651	2.17247	0	0.301857	Superficial_Epithelial_0dpa
dnmbp#chr12:31637870-31639776	chr12:31637870-31639776	TSS	0	dnmbp	MA1130.1	chr12:31639180-31639191	-0.0451503	0.0344601	0.0724729	fosl2	0.0837069	fosl2->dnmbp	1.0767	0.0315148	0	0	1.62846	2.17247	0	0.301857	Superficial_Epithelial_0dpa
dnmbp#chr12:31637870-31639776	chr12:31637870-31639776	TSS	0	dnmbp	MA1137.1	chr12:31639179-31639191	-0.0421087	0.0413831	0.0631185	fosl1a	0.123797	fosl1a->dnmbp	14.8204	0.100103	0	0	2.74651	2.17247	0	0.301857	Superficial_Epithelial_0dpa
dnmbp#chr12:31637870-31639776	chr12:31637870-31639776	TSS	0	dnmbp	MA1138.1	chr12:31639180-31639189	-0.045339	0.0383371	0.0946076	fosl2	0.084033	fosl2->dnmbp	1.0767	0.0315148	0	0	1.62846	2.17247	0	0.301857	Superficial_Epithelial_0dpa
dnmbp#chr12:31637870-31639776	chr12:31637870-31639776	TSS	0	dnmbp	MA1138.1	chr12:31639181-31639190	-0.0419265	0.0333572	0.090875	fosl2	0.084033	fosl2->dnmbp	1.0767	0.0315148	0	0	1.62846	2.17247	0	0.301857	Superficial_Epithelial_0dpa
dnmbp#chr12:31637870-31639776	chr12:31637870-31639776	TSS	0	dnmbp	MA1142.1	chr12:31639181-31639190	-0.0419265	0.0333572	0.090875	fosl1a	0.132058	fosl1a->dnmbp	14.8204	0.100103	0	0	2.74651	2.17247	0	0.301857	Superficial_Epithelial_0dpa
dnmbp#chr12:31637870-31639776	chr12:31637870-31639776	TSS	0	dnmbp	MA1144.1	chr12:31639180-31639189	-0.045339	0.0383371	0.0946076	fosl2	0.0824373	fosl2->dnmbp	1.0767	0.0315148	0	0	1.62846	2.17247	0	0.301857	Superficial_Epithelial_0dpa
dnmbp#chr12:31637870-31639776	chr12:31637870-31639776	TSS	0	dnmbp	MA0477.2	chr12:31639179-31639191	-0.0421087	0.0413831	0.0631185	fosl1a	0.126437	fosl1a->dnmbp	14.8204	0.100103	0	0	2.74651	2.17247	0	0.301857	Superficial_Epithelial_0dpa
dnmbp#chr12:31637870-31639776	chr12:31637870-31639776	TSS	0	dnmbp	MA0477.2	chr12:31639179-31639191	-0.0421087	0.0413831	0.0631185	fosl1a	0.126437	fosl1a->dnmbp	14.8204	0.100103	0	0	2.74651	2.17247	0	0.301857	Superficial_Epithelial_0dpa
dnmt3ab#chr17:36987326-36989357	chr17:36987326-36989357	Body	0.119	dnmt3ab	MA1101.2	chr17:36988274-36988292	-0.0857501	0.0713268	0.13854	bach2b	0.0657534	bach2b->dnmt3ab	8.10333	0.146735	0	0	0.209666	0.0773762	0	0.223618	Superficial_Epithelial_0dpa
dnmt3ab#chr17:36987326-36989357	chr17:36987326-36989357	Body	0.119	dnmt3ab	MA1101.2	chr17:36988274-36988292	-0.0857501	0.0713268	0.13854	bach2b	0.0657534	bach2b->dnmt3ab	8.10333	0.146735	0	0	0.209666	0.0773762	0	0.223618	Superficial_Epithelial_0dpa
dnmt3ab#chr17:36987326-36989357	chr17:36987326-36989357	Body	0.119	dnmt3ab	MA1527.1	chr17:36988449-36988465	-0.0720185	0.115724	0.0901962	nfic	0.072754	nfic->dnmt3ab	6.12045	0.116483	0	0	0.510769	0.0773762	0	0.223618	Superficial_Epithelial_0dpa
dnmt3ab#chr17:36987326-36989357	chr17:36987326-36989357	TSS	0.119	dnmt3ab	MA1101.2	chr17:36988274-36988292	-0.0857501	0.0713268	0.13854	bach2b	0.0657534	bach2b->dnmt3ab	8.10333	0.146735	0	0	0.209666	0.0773762	0	0.223618	Superficial_Epithelial_0dpa
dnmt3ab#chr17:36987326-36989357	chr17:36987326-36989357	TSS	0.119	dnmt3ab	MA1101.2	chr17:36988274-36988292	-0.0857501	0.0713268	0.13854	bach2b	0.0657534	bach2b->dnmt3ab	8.10333	0.146735	0	0	0.209666	0.0773762	0	0.223618	Superficial_Epithelial_0dpa
dnmt3ab#chr17:36987326-36989357	chr17:36987326-36989357	TSS	0.119	dnmt3ab	MA1527.1	chr17:36988449-36988465	-0.0720185	0.115724	0.0901962	nfic	0.072754	nfic->dnmt3ab	6.12045	0.116483	0	0	0.510769	0.0773762	0	0.223618	Superficial_Epithelial_0dpa
dock5#chr8:6798875-6799996	chr8:6798875-6799996	Body	0.116	dock5	MA0100.3	chr8:6799555-6799564	-0.0920384	0.0877085	0.148112	myb	0.0642334	myb->dock5	3.67584	0.034092	0	0	0.170312	0.0436511	0	0.178633	Superficial_Epithelial_0dpa
dok1a#chr1:41478057-41479577	chr1:41478057-41479577	TSS	0	dok1a	MA0746.2	chr1:41478884-41478896	-0.425362	1.20331	1.68817	sp3b	0.0712338	sp3b->dok1a	2.61239	0.0324505	0	0	0.0996294	0.09649	0	2.56	Superficial_Epithelial_0dpa
dot1l#chr22:20836185-20838741	chr22:20836185-20838741	TSS	0	dot1l	MA0073.1	chr22:20838271-20838290	-0.170532	0.642087	0.825427	rreb1a	0.0500665	rreb1a->dot1l	1.96374	0.0327715	0	0	0.266798	0.124329	0	1.60962	Superficial_Epithelial_0dpa
dot1l#chr22:20836185-20838741	chr22:20836185-20838741	TSS	0	dot1l	MA0073.1	chr22:20838273-20838292	-0.0402887	0.390412	0.703928	rreb1a	0.0500665	rreb1a->dot1l	1.96374	0.0327715	0	0	0.266798	0.124329	0	1.60962	Superficial_Epithelial_0dpa
dot1l#chr22:20836185-20838741	chr22:20836185-20838741	TSS	0	dot1l	MA0073.1	chr22:20838275-20838294	0.0156957	0.263482	0.740286	rreb1a	0.0500665	rreb1a->dot1l	1.96374	0.0327715	0	0	0.266798	0.124329	0	1.60962	Superficial_Epithelial_0dpa
dot1l#chr22:20836185-20838741	chr22:20836185-20838741	TSS	0	dot1l	MA0073.1	chr22:20838281-20838300	0.105646	0.0822501	0.675223	rreb1a	0.0500665	rreb1a->dot1l	1.96374	0.0327715	0	0	0.266798	0.124329	0	1.60962	Superficial_Epithelial_0dpa
dsc2l#chr20:7293301-7294329	chr20:7293301-7294329	Body	0.063	dsc2l	MA1126.1	chr20:7293950-7293965	-0.0108816	1.30885	0.862954	fosab	0.10646	fosab->dsc2l	7.81548	0.14837	0	0	2.65236	3.60644	0	2.60667	Superficial_Epithelial_0dpa
dsc2l#chr20:7293301-7294329	chr20:7293301-7294329	Body	0.063	dsc2l	MA1515.1	chr20:7293658-7293668	0.448442	-0.191134	2.07083	klf2b	0.107486	klf2b->dsc2l	3.68716	0.0915384	0	0	1.42664	3.60644	0	2.60667	Superficial_Epithelial_0dpa
dsc2l#chr20:7293301-7294329	chr20:7293301-7294329	TSS	0.063	dsc2l	MA1126.1	chr20:7293950-7293965	-0.0108816	1.30885	0.862954	fosab	0.10646	fosab->dsc2l	7.81548	0.14837	0	0	2.65236	3.60644	0	2.60667	Superficial_Epithelial_0dpa
dsc2l#chr20:7293301-7294329	chr20:7293301-7294329	TSS	0.063	dsc2l	MA1515.1	chr20:7293658-7293668	0.448442	-0.191134	2.07083	klf2b	0.107486	klf2b->dsc2l	3.68716	0.0915384	0	0	1.42664	3.60644	0	2.60667	Superficial_Epithelial_0dpa
dtx4b#chr1:41497755-41498999	chr1:41497755-41498999	TSS	0	dtx4b	MA0522.3	chr1:41498003-41498013	-0.156253	0.129889	0.129538	tcf3a	0.0820155	tcf3a->dtx4b	1.52756	0.069818	0	0	0.450357	0.203537	0	1.49848	Superficial_Epithelial_0dpa
dusp19b#chr7:6660502-6663024	chr7:6660502-6663024	Body	0.112	dusp19b	MA1126.1	chr7:6660859-6660874	-0.0943643	0.194318	0.127826	fosab	0.10646	fosab->dusp19b	4.18729	0.1078	0	0	2.65236	0.691628	0	1.4406	Superficial_Epithelial_0dpa
dusp19b#chr7:6660502-6663024	chr7:6660502-6663024	Body	0.112	dusp19b	MA0522.3	chr7:6660773-6660783	-0.114131	0.155451	0.0558148	tcf3a	0.0820155	tcf3a->dusp19b	1.07324	0.0594585	0	0	0.450357	0.691628	0	1.4406	Superficial_Epithelial_0dpa
dusp19b#chr7:6660502-6663024	chr7:6660502-6663024	Body	0.112	dusp19b	MA0522.3	chr7:6662831-6662841	-0.0445052	0.0672748	0.0670817	tcf3a	0.0820155	tcf3a->dusp19b	1.07324	0.0594585	0	0	0.450357	0.691628	0	1.4406	Superficial_Epithelial_0dpa
dusp19b#chr7:6668373-6669869	chr7:6668373-6669869	Body	0.114	dusp19b	MA0840.1	chr7:6668970-6668981	-0.136179	0.204424	0.161561	creb5b	0.128114	creb5b->dusp19b	2.4549	0.0805304	0	0	0.361049	0.691628	0	1.42	Superficial_Epithelial_0dpa
dusp19b#chr7:6668373-6669869	chr7:6668373-6669869	Body	0.114	dusp19b	MA1133.1	chr7:6668970-6668981	-0.136179	0.204424	0.161561	junbb	0.090798	junbb->dusp19b	4.95776	0.0906267	0	0	1.09612	0.691628	0	1.42	Superficial_Epithelial_0dpa
dusp5#chr22:29938300-29939548	chr22:29938300-29939548	Inter	0.071	dusp5	MA0478.1	chr22:29938870-29938880	0.0770869	0.53668	-0.0960873	fosl2	0.0934041	fosl2->dusp5	4.96657	0.100767	0	0	1.62846	2.64355	0	2.21688	Superficial_Epithelial_0dpa
dusp5#chr22:29938300-29939548	chr22:29938300-29939548	Inter	0.071	dusp5	MA1130.1	chr22:29938869-29938880	0.0218682	0.390033	-0.163977	fosl2	0.0837069	fosl2->dusp5	4.96657	0.100767	0	0	1.62846	2.64355	0	2.21688	Superficial_Epithelial_0dpa
dusp5#chr22:29938300-29939548	chr22:29938300-29939548	Inter	0.071	dusp5	MA1138.1	chr22:29938507-29938516	-0.0301464	0.0990503	0.0392218	fosl2	0.084033	fosl2->dusp5	4.96657	0.100767	0	0	1.62846	2.64355	0	2.21688	Superficial_Epithelial_0dpa
dusp5#chr22:29938300-29939548	chr22:29938300-29939548	Inter	0.071	dusp5	MA1138.1	chr22:29938508-29938517	-0.0324691	0.101727	0.0339672	fosl2	0.084033	fosl2->dusp5	4.96657	0.100767	0	0	1.62846	2.64355	0	2.21688	Superficial_Epithelial_0dpa
dusp5#chr22:29938300-29939548	chr22:29938300-29939548	Inter	0.071	dusp5	MA1142.1	chr22:29938507-29938516	-0.0301464	0.0990503	0.0392218	fosl1a	0.132058	fosl1a->dusp5	79.9339	0.255596	0	0	2.74651	2.64355	0	2.21688	Superficial_Epithelial_0dpa
dusp5#chr22:29938300-29939548	chr22:29938300-29939548	Inter	0.071	dusp5	MA1142.1	chr22:29938508-29938517	-0.0324691	0.101727	0.0339672	fosl1a	0.132058	fosl1a->dusp5	79.9339	0.255596	0	0	2.74651	2.64355	0	2.21688	Superficial_Epithelial_0dpa
dusp5#chr22:29938300-29939548	chr22:29938300-29939548	Inter	0.071	dusp5	MA1144.1	chr22:29938507-29938516	-0.0301464	0.0990503	0.0392218	fosl2	0.0824373	fosl2->dusp5	4.96657	0.100767	0	0	1.62846	2.64355	0	2.21688	Superficial_Epithelial_0dpa
dusp5#chr22:29938300-29939548	chr22:29938300-29939548	Inter	0.071	dusp5	MA1144.1	chr22:29938869-29938878	0.119046	0.645756	-0.10697	fosl2	0.0824373	fosl2->dusp5	4.96657	0.100767	0	0	1.62846	2.64355	0	2.21688	Superficial_Epithelial_0dpa
dusp5#chr22:29938300-29939548	chr22:29938300-29939548	Inter	0.071	dusp5	MA1144.1	chr22:29938508-29938517	-0.0324691	0.101727	0.0339672	fosl2	0.0824373	fosl2->dusp5	4.96657	0.100767	0	0	1.62846	2.64355	0	2.21688	Superficial_Epithelial_0dpa
dusp6#chr25:18329700-18331032	chr25:18329700-18331032	TSS	0	dusp6	MA1128.1	chr25:18330285-18330297	0.129155	0.0964374	1.09365	fosl1a	0.122265	fosl1a->dusp6	4.07	0.0586896	0	0	2.74651	0.706665	0	1.72394	Superficial_Epithelial_0dpa
dusp6#chr25:18329700-18331032	chr25:18329700-18331032	TSS	0	dusp6	MA1137.1	chr25:18330285-18330297	0.129155	0.0964374	1.09365	fosl1a	0.123797	fosl1a->dusp6	4.07	0.0586896	0	0	2.74651	0.706665	0	1.72394	Superficial_Epithelial_0dpa
dusp6#chr25:18329700-18331032	chr25:18329700-18331032	TSS	0	dusp6	MA1142.1	chr25:18330286-18330295	0.0738805	-0.0636849	1.09811	fosl1a	0.132058	fosl1a->dusp6	4.07	0.0586896	0	0	2.74651	0.706665	0	1.72394	Superficial_Epithelial_0dpa
dusp6#chr25:18329700-18331032	chr25:18329700-18331032	TSS	0	dusp6	MA0477.2	chr25:18330285-18330297	0.129155	0.0964374	1.09365	fosl1a	0.126437	fosl1a->dusp6	4.07	0.0586896	0	0	2.74651	0.706665	0	1.72394	Superficial_Epithelial_0dpa
dusp6#chr25:18331382-18331685	chr25:18331382-18331685	TSS	0	dusp6	MA1140.2	chr25:18331423-18331434	0.00901455	0.00194759	0.234077	junbb	0.0902616	junbb->dusp6	1.70685	0.0661506	0	0	1.09612	0.706665	0	4.17413	Superficial_Epithelial_0dpa
dusp6#chr25:18331382-18331685	chr25:18331382-18331685	TSS	0	dusp6	MA1951.1	chr25:18331422-18331435	0.0505635	-0.000882495	0.206405	fosab	0.154414	fosab->dusp6	9.89708	0.113305	0	0	2.65236	0.706665	0	4.17413	Superficial_Epithelial_0dpa
dynlt1#chr4:389997-390727	chr4:389997-390727	TSS	0	dynlt1	MA0006.1	chr4:390514-390519	-0.0968059	0.0804022	0.0473947	arnt	0.0564374	arnt->dynlt1	2.00132	0.0373293	0	0	0.282055	0.00693641	0	0.735536	Superficial_Epithelial_0dpa
dyrk3#chr11:21266604-21267829	chr11:21266604-21267829	TSS	0	dyrk3	MA0480.2	chr11:21267693-21267703	-0.0218155	0.752486	-0.0195615	foxo1a	0.0795932	foxo1a->dyrk3	2.20061	0.0514711	0	0	2.13262	0.466112	0	1.50931	Superficial_Epithelial_0dpa
ece1#chr11:27952651-27953882	chr11:27952651-27953882	TSS	0	ece1	MA0851.1	chr11:27952838-27952854	-0.0379893	0.0230743	0.0987006	foxj3	0.0770929	foxj3->ece1	2.46861	0.0674661	0	0	0.643544	0.525139	0	2.17362	Superficial_Epithelial_0dpa
ece1#chr11:27952651-27953882	chr11:27952651-27953882	TSS	0	ece1	MA1955.1	chr11:27953568-27953581	0.13343	-0.0127198	0.752707	elk3	0.0570459	elk3->ece1	1.70177	0.0601941	0	0	0.322853	0.525139	0	2.17362	Superficial_Epithelial_0dpa
ecm1b#chr16:9713525-9714728	chr16:9713525-9714728	TSS	0	ecm1b	MA0511.2	chr16:9714334-9714342	-0.113218	0.0901658	0.131582	runx2b	0.0696328	runx2b->ecm1b	23.6487	0.148924	0	0	0.579878	0.983768	0	1.87395	Superficial_Epithelial_0dpa
eef1a1l1#chr19:43122372-43123631	chr19:43122372-43123631	Body	0.075	eef1a1l1	MA0478.1	chr19:43123493-43123503	-0.165031	1.30517	1.90119	fosl2	0.0934041	fosl2->eef1a1l1	8.18703	0.112966	0	0	1.62846	3.20207	0	2.16119	Superficial_Epithelial_0dpa
eef1a1l1#chr19:43122372-43123631	chr19:43122372-43123631	Body	0.075	eef1a1l1	MA1130.1	chr19:43123494-43123505	-0.123768	1.27176	1.8511	fosl2	0.0837069	fosl2->eef1a1l1	8.18703	0.112966	0	0	1.62846	3.20207	0	2.16119	Superficial_Epithelial_0dpa
eef1a1l1#chr19:43122372-43123631	chr19:43122372-43123631	Body	0.075	eef1a1l1	MA1131.1	chr19:43123207-43123217	-0.767541	0.838872	1.1012	fosl2	0.0630162	fosl2->eef1a1l1	8.18703	0.112966	0	0	1.62846	3.20207	0	2.16119	Superficial_Epithelial_0dpa
eef1a1l1#chr19:43122372-43123631	chr19:43122372-43123631	Body	0.075	eef1a1l1	MA1138.1	chr19:43123494-43123503	-0.355913	1.45662	2.20933	fosl2	0.084033	fosl2->eef1a1l1	8.18703	0.112966	0	0	1.62846	3.20207	0	2.16119	Superficial_Epithelial_0dpa
eef1a1l1#chr19:43122372-43123631	chr19:43122372-43123631	Body	0.075	eef1a1l1	MA1144.1	chr19:43123494-43123503	-0.355913	1.45662	2.20933	fosl2	0.0824373	fosl2->eef1a1l1	8.18703	0.112966	0	0	1.62846	3.20207	0	2.16119	Superficial_Epithelial_0dpa
eef1b2#chr6:13199621-13201286	chr6:13199621-13201286	TSS	0	eef1b2	MA0147.3	chr6:13199939-13199950	-0.049351	0.0568964	0.0573111	mycb	0.052455	mycb->eef1b2	4.68408	0.0657325	0	0	0.281657	0.980716	0	0.984844	Superficial_Epithelial_0dpa
efna1b#chr16:23297139-23298984	chr16:23297139-23298984	Body	0.103	efna1b	MA0840.1	chr16:23297812-23297823	-0.0597765	0.0656677	0.0899142	creb5b	0.128114	creb5b->efna1b	3.44597	0.0864357	0	0	0.361049	0.726438	0	1.1106	Superficial_Epithelial_0dpa
efna1b#chr16:23294185-23295045	chr16:23294185-23295045	TSS	0	efna1b	MA0147.3	chr16:23294602-23294613	-0.0172141	0.526837	0.89464	mycb	0.052455	mycb->efna1b	1.28355	0.0498033	0	0	0.281657	0.726438	0	2.75904	Superficial_Epithelial_0dpa
efna1b#chr16:23294185-23295045	chr16:23294185-23295045	TSS	0	efna1b	MA0477.2	chr16:23294700-23294712	-0.0209526	0.273511	0.183604	fosl1a	0.126437	fosl1a->efna1b	1.67533	0.0652015	0	0	2.74651	0.726438	0	2.75904	Superficial_Epithelial_0dpa
efna1b#chr16:23294185-23295045	chr16:23294185-23295045	TSS	0	efna1b	MA0522.3	chr16:23294603-23294613	-0.0441038	0.544296	1.06338	tcf3a	0.0820155	tcf3a->efna1b	18.9176	0.154098	0	0	0.450357	0.726438	0	2.75904	Superficial_Epithelial_0dpa
efna5a#chr21:20548173-20549688	chr21:20548173-20549688	TSS	0	efna5a	MA0795.1	chr21:20548821-20548830	-0.059961	0.0401125	0.0875358	smad3a	0.0894726	smad3a->efna5a	1.1266	0.0508059	0	0	0.331042	1.46842	0	2.92728	Superficial_Epithelial_0dpa
efnb2a#chr9:26102500-26105103	chr9:26102500-26105103	TSS	0	efnb2a	MA0101.1	chr9:26103330-26103339	-0.0246385	-0.000513244	0.184961	rel	0.0845928	rel->efnb2a	1.68832	0.0559572	0	0	0.777053	0.957531	0	2.17049	Superficial_Epithelial_0dpa
egfra#chr2:3761655-3762584	chr2:3761655-3762584	Body	0.076	egfra	MA1527.1	chr2:3761977-3761993	-0.928488	2.25157	2.70481	nfic	0.072754	nfic->egfra	3.07093	0.084976	0	0	0.510769	1.6337	0	2.43014	Superficial_Epithelial_0dpa
egfra#chr2:3761655-3762584	chr2:3761655-3762584	Body	0.076	egfra	MA1527.1	chr2:3761977-3761993	-0.928488	2.25157	2.70481	nfic	0.072754	nfic->egfra	3.07093	0.084976	0	0	0.510769	1.6337	0	2.43014	Superficial_Epithelial_0dpa
egfra#chr2:3761655-3762584	chr2:3761655-3762584	Body	0.076	egfra	MA0522.3	chr2:3761961-3761971	-0.755514	2.16801	-0.204708	tcf3a	0.0820155	tcf3a->egfra	4.08116	0.0874231	0	0	0.450357	1.6337	0	2.43014	Superficial_Epithelial_0dpa
egfra#chr2:3683535-3684174	chr2:3683535-3684174	Inter	0.065	egfra	MA0600.2	chr2:3683776-3683791	-0.145498	0.236351	0.4295	rfx2	0.076513	rfx2->egfra	2.96405	0.0856364	0	0	0.545874	1.6337	0	1.05763	Superficial_Epithelial_0dpa
egfra#chr2:3683535-3684174	chr2:3683535-3684174	Inter	0.065	egfra	MA0600.2	chr2:3683776-3683791	-0.145498	0.236351	0.4295	rfx2	0.076513	rfx2->egfra	2.96405	0.0856364	0	0	0.545874	1.6337	0	1.05763	Superficial_Epithelial_0dpa
egfra#chr2:3683535-3684174	chr2:3683535-3684174	Inter	0.065	egfra	MA1117.1	chr2:3683920-3683930	-0.00653461	0.128188	0.0520011	relb	0.127546	relb->egfra	1.51652	0.0652656	0	0	0.585144	1.6337	0	1.05763	Superficial_Epithelial_0dpa
egfra#chr2:3695623-3696911	chr2:3695623-3696911	TSS	0	egfra	MA0480.2	chr2:3695925-3695935	-0.237625	0.206109	0.0968315	foxo1a	0.0795932	foxo1a->egfra	2.49001	0.0692201	0	0	2.13262	1.6337	0	1.74756	Superficial_Epithelial_0dpa
egr2a#chr17:43665795-43666919	chr17:43665795-43666919	TSS	0	egr2a	MA1131.1	chr17:43666215-43666225	-0.129169	0.870776	2.65035	fosl2	0.0630162	fosl2->egr2a	2.38404	0.0674381	0	0	1.62846	0.808425	0	2.07888	Superficial_Epithelial_0dpa
egr2a#chr17:43665795-43666919	chr17:43665795-43666919	TSS	0	egr2a	MA1131.1	chr17:43666216-43666226	-0.121627	0.718808	2.72496	fosl2	0.0630162	fosl2->egr2a	2.38404	0.0674381	0	0	1.62846	0.808425	0	2.07888	Superficial_Epithelial_0dpa
egr2a#chr17:43665795-43666919	chr17:43665795-43666919	TSS	0	egr2a	MA1133.1	chr17:43666215-43666226	-0.238156	0.740806	2.62454	junbb	0.090798	junbb->egr2a	2.68599	0.0471942	0	0	1.09612	0.808425	0	2.07888	Superficial_Epithelial_0dpa
egr2a#chr17:43665795-43666919	chr17:43665795-43666919	TSS	0	egr2a	MA1136.1	chr17:43666216-43666225	0.00991079	0.745005	2.73068	junbb	0.0827228	junbb->egr2a	2.68599	0.0471942	0	0	1.09612	0.808425	0	2.07888	Superficial_Epithelial_0dpa
egr2a#chr17:43665795-43666919	chr17:43665795-43666919	TSS	0	egr2a	MA1136.1	chr17:43666216-43666225	0.00991079	0.745005	2.73068	junba	0.0510403	junba->egr2a	14.1089	0.107871	0	0	1.93563	0.808425	0	2.07888	Superficial_Epithelial_0dpa
egr2a#chr17:43665795-43666919	chr17:43665795-43666919	TSS	0	egr2a	MA1136.1	chr17:43666216-43666225	0.00991079	0.745005	2.73068	junbb	0.0827228	junbb->egr2a	2.68599	0.0471942	0	0	1.09612	0.808425	0	2.07888	Superficial_Epithelial_0dpa
egr2a#chr17:43665795-43666919	chr17:43665795-43666919	TSS	0	egr2a	MA1136.1	chr17:43666216-43666225	0.00991079	0.745005	2.73068	junba	0.0510403	junba->egr2a	14.1089	0.107871	0	0	1.93563	0.808425	0	2.07888	Superficial_Epithelial_0dpa
egr2a#chr17:43665795-43666919	chr17:43665795-43666919	TSS	0	egr2a	MA1139.1	chr17:43666215-43666226	-0.238156	0.740806	2.62454	fosl2	0.0569617	fosl2->egr2a	2.38404	0.0674381	0	0	1.62846	0.808425	0	2.07888	Superficial_Epithelial_0dpa
egr2a#chr17:43665795-43666919	chr17:43665795-43666919	TSS	0	egr2a	MA1139.1	chr17:43666215-43666226	-0.238156	0.740806	2.62454	junbb	0.0817679	junbb->egr2a	2.68599	0.0471942	0	0	1.09612	0.808425	0	2.07888	Superficial_Epithelial_0dpa
egr2a#chr17:43665795-43666919	chr17:43665795-43666919	TSS	0	egr2a	MA1139.1	chr17:43666215-43666226	-0.238156	0.740806	2.62454	fosl2	0.0569617	fosl2->egr2a	2.38404	0.0674381	0	0	1.62846	0.808425	0	2.07888	Superficial_Epithelial_0dpa
egr2a#chr17:43665795-43666919	chr17:43665795-43666919	TSS	0	egr2a	MA1139.1	chr17:43666215-43666226	-0.238156	0.740806	2.62454	junbb	0.0817679	junbb->egr2a	2.68599	0.0471942	0	0	1.09612	0.808425	0	2.07888	Superficial_Epithelial_0dpa
egr2a#chr17:43665795-43666919	chr17:43665795-43666919	TSS	0	egr2a	MA1140.2	chr17:43666215-43666226	-0.238156	0.740806	2.62454	junbb	0.0902616	junbb->egr2a	2.68599	0.0471942	0	0	1.09612	0.808425	0	2.07888	Superficial_Epithelial_0dpa
egr2a#chr17:43665795-43666919	chr17:43665795-43666919	TSS	0	egr2a	MA1140.2	chr17:43666215-43666226	-0.238156	0.740806	2.62454	junbb	0.0902616	junbb->egr2a	2.68599	0.0471942	0	0	1.09612	0.808425	0	2.07888	Superficial_Epithelial_0dpa
egr2a#chr17:43665795-43666919	chr17:43665795-43666919	TSS	0	egr2a	MA1951.1	chr17:43666214-43666227	-0.0842753	0.549535	2.02689	fosab	0.154414	fosab->egr2a	2.13873	0.0439479	0	0	2.65236	0.808425	0	2.07888	Superficial_Epithelial_0dpa
egr2a#chr17:43665795-43666919	chr17:43665795-43666919	TSS	0	egr2a	MA1951.1	chr17:43666214-43666227	-0.0842753	0.549535	2.02689	fosab	0.154414	fosab->egr2a	2.13873	0.0439479	0	0	2.65236	0.808425	0	2.07888	Superficial_Epithelial_0dpa
ehbp1#chr17:24108980-24109798	chr17:24108980-24109798	Body	0.202	ehbp1	MA0481.3	chr17:24109107-24109117	-0.338602	0.432346	0.809168	foxp1b	0.0976319	foxp1b->ehbp1	3.82584	0.0990774	0	0	0.0287816	0.0587016	0	0.495096	Superficial_Epithelial_0dpa
ehbp1#chr17:24108980-24109798	chr17:24108980-24109798	TSS	0.202	ehbp1	MA0481.3	chr17:24109107-24109117	-0.338602	0.432346	0.809168	foxp1b	0.0976319	foxp1b->ehbp1	3.82584	0.0990774	0	0	0.0287816	0.0587016	0	0.495096	Superficial_Epithelial_0dpa
eif2ak2#chr13:50233715-50235409	chr13:50233715-50235409	TSS	0	eif2ak2	MA0517.1	chr13:50234245-50234259	1.06676	0.267609	-0.0368397	stat1b	0.151583	stat1b->eif2ak2	6.74529	0.0792081	0	0	0.572188	0.249447	0	2.01904	Superficial_Epithelial_0dpa
eif2ak2#chr13:50233715-50235409	chr13:50233715-50235409	TSS	0	eif2ak2	MA0517.1	chr13:50234640-50234654	-0.0594901	0.0707996	0.149385	stat1b	0.151583	stat1b->eif2ak2	6.74529	0.0792081	0	0	0.572188	0.249447	0	2.01904	Superficial_Epithelial_0dpa
eif2ak2#chr13:50233715-50235409	chr13:50233715-50235409	TSS	0	eif2ak2	MA0517.1	chr13:50235151-50235165	0.442814	0.274851	-0.114933	stat1b	0.151583	stat1b->eif2ak2	6.74529	0.0792081	0	0	0.572188	0.249447	0	2.01904	Superficial_Epithelial_0dpa
eif2ak2#chr13:50233715-50235409	chr13:50233715-50235409	TSS	0	eif2ak2	MA0137.3	chr13:50234171-50234181	0.380032	-0.593741	1.49971	stat1b	0.0662396	stat1b->eif2ak2	6.74529	0.0792081	0	0	0.572188	0.249447	0	2.01904	Superficial_Epithelial_0dpa
eif2ak2#chr13:50233715-50235409	chr13:50233715-50235409	TSS	0	eif2ak2	MA0772.1	chr13:50235153-50235166	0.215818	0.620806	0.132846	irf7	0.0852944	irf7->eif2ak2	3.13032	0.0896016	0	0	0.785997	0.249447	0	2.01904	Superficial_Epithelial_0dpa
eif2ak2#chr13:50233715-50235409	chr13:50233715-50235409	TSS	0	eif2ak2	MA0050.3	chr13:50234642-50234656	-0.11574	0.13903	0.220325	irf1b	0.108859	irf1b->eif2ak2	3.04078	0.0825853	0	0	0.586434	0.249447	0	2.01904	Superficial_Epithelial_0dpa
eif3ba#chr3:41689448-41690557	chr3:41689448-41690557	Inter	0.059	eif3ba	MA0772.1	chr3:41689668-41689681	-0.10372	0.135138	0.132711	irf7	0.0852944	irf7->eif3ba	1.07015	0.0330747	0	0	0.785997	0.435377	0	1.73473	Superficial_Epithelial_0dpa
eif3ea#chr16:38628272-38629359	chr16:38628272-38629359	TSS	0	eif3ea	MA0772.1	chr16:38628483-38628496	-0.0421534	0.0284509	0.185508	irf7	0.0852944	irf7->eif3ea	1.27377	0.0483558	0	0	0.785997	0.614654	0	1.0013	Superficial_Epithelial_0dpa
eif3ea#chr16:38628272-38629359	chr16:38628272-38629359	TSS	0	eif3ea	MA0147.3	chr16:38628935-38628946	0.0728163	0.468756	-0.262576	mycb	0.052455	mycb->eif3ea	1.14736	0.0579537	0	0	0.281657	0.614654	0	1.0013	Superficial_Epithelial_0dpa
eif3ea#chr16:38628272-38629359	chr16:38628272-38629359	TSS	0	eif3ea	MA0734.3	chr16:38629083-38629095	-0.190665	0.11541	0.437677	gli2a	0.101933	gli2a->eif3ea	1.28381	0.064134	0	0	0.0506187	0.614654	0	1.0013	Superficial_Epithelial_0dpa
eif4a1a#chr7:26516885-26519093	chr7:26516885-26519093	TSS	0	eif4a1a	MA1128.1	chr7:26518663-26518675	0.0173775	-0.0124712	0.161241	fosl1a	0.122265	fosl1a->eif4a1a	9.67699	0.10402	0	0	2.74651	1.148	0	1.66284	Superficial_Epithelial_0dpa
eif4a1a#chr7:26516885-26519093	chr7:26516885-26519093	TSS	0	eif4a1a	MA1101.2	chr7:26518649-26518667	0.0764304	0.248691	0.0361778	bach2b	0.0657534	bach2b->eif4a1a	5.82301	0.0782052	0	0	0.209666	1.148	0	1.66284	Superficial_Epithelial_0dpa
eif4a1a#chr7:26516885-26519093	chr7:26516885-26519093	TSS	0	eif4a1a	MA1101.2	chr7:26518649-26518667	0.0764304	0.248691	0.0361778	bach2b	0.0657534	bach2b->eif4a1a	5.82301	0.0782052	0	0	0.209666	1.148	0	1.66284	Superficial_Epithelial_0dpa
eif4a3#chr11:44897008-44899497	chr11:44897008-44899497	TSS	0	eif4a3	MA0147.3	chr11:44899316-44899327	-0.0363911	0.0602732	0.04354	myca	0.0687634	myca->eif4a3	1.73995	0.0359163	0	0	0.0350607	0.246863	0	1.42551	Superficial_Epithelial_0dpa
eif4g2b#chr18:16715451-16717229	chr18:16715451-16717229	TSS	0	eif4g2b	MA1633.2	chr18:16716954-16716962	-0.0925508	0.0817491	0.163071	bach1b	0.0601907	bach1b->eif4g2b	4.60843	0.0695813	0	0	0.925602	0.694994	0	1.02861	Superficial_Epithelial_0dpa
eif5#chr20:18702471-18704048	chr20:18702471-18704048	Body	0.069	eif5	MA0525.2	chr20:18702997-18703014	-0.212398	0.876629	0.130557	tp63	0.180472	tp63->eif5	2.98183	0.0782855	0	0	0.439364	0.574746	0	1.34893	Superficial_Epithelial_0dpa
eif5#chr20:18702471-18704048	chr20:18702471-18704048	Body	0.069	eif5	MA0525.2	chr20:18702997-18703014	-0.212398	0.876629	0.130557	tp63	0.180472	tp63->eif5	2.98183	0.0782855	0	0	0.439364	0.574746	0	1.34893	Superficial_Epithelial_0dpa
eif5#chr20:18702471-18704048	chr20:18702471-18704048	Body	0.069	eif5	MA0861.1	chr20:18702997-18703014	-0.212398	0.876629	0.130557	tp73	0.0846239	tp73->eif5	1.76163	0.0340165	0	0	0.0373124	0.574746	0	1.34893	Superficial_Epithelial_0dpa
eif5#chr20:18702471-18704048	chr20:18702471-18704048	TSS	0.069	eif5	MA0525.2	chr20:18702997-18703014	-0.212398	0.876629	0.130557	tp63	0.180472	tp63->eif5	2.98183	0.0782855	0	0	0.439364	0.574746	0	1.34893	Superficial_Epithelial_0dpa
eif5#chr20:18702471-18704048	chr20:18702471-18704048	TSS	0.069	eif5	MA0525.2	chr20:18702997-18703014	-0.212398	0.876629	0.130557	tp63	0.180472	tp63->eif5	2.98183	0.0782855	0	0	0.439364	0.574746	0	1.34893	Superficial_Epithelial_0dpa
eif5#chr20:18702471-18704048	chr20:18702471-18704048	TSS	0.069	eif5	MA0861.1	chr20:18702997-18703014	-0.212398	0.876629	0.130557	tp73	0.0846239	tp73->eif5	1.76163	0.0340165	0	0	0.0373124	0.574746	0	1.34893	Superficial_Epithelial_0dpa
eif5a2#chr2:25838825-25840957	chr2:25838825-25840957	TSS	0	eif5a2	MA1633.2	chr2:25839706-25839714	0.156432	0.508019	-0.189675	bach1b	0.0601907	bach1b->eif5a2	5.14031	0.0762093	0	0	0.925602	0.456171	0	0.856539	Superficial_Epithelial_0dpa
eif5b#chr1:45925098-45926081	chr1:45925098-45926081	TSS	0	eif5b	MA1127.1	chr1:45925251-45925261	-0.220683	0.187085	-0.0779997	fosb	0.150449	fosb->eif5b	3.84681	0.0727738	0	0	2.01852	0.315719	0	1.49447	Superficial_Epithelial_0dpa
eif5b#chr1:45925098-45926081	chr1:45925098-45926081	TSS	0	eif5b	MA1127.1	chr1:45925252-45925262	-0.240834	0.211996	-0.0570187	fosb	0.150449	fosb->eif5b	3.84681	0.0727738	0	0	2.01852	0.315719	0	1.49447	Superficial_Epithelial_0dpa
eif5b#chr1:45925098-45926081	chr1:45925098-45926081	TSS	0	eif5b	MA1136.1	chr1:45925252-45925261	-0.245171	0.215259	-0.0770474	fosb	0.133295	fosb->eif5b	3.84681	0.0727738	0	0	2.01852	0.315719	0	1.49447	Superficial_Epithelial_0dpa
eif5b#chr1:45925098-45926081	chr1:45925098-45926081	TSS	0	eif5b	MA1136.1	chr1:45925252-45925261	-0.245171	0.215259	-0.0770474	fosb	0.133295	fosb->eif5b	3.84681	0.0727738	0	0	2.01852	0.315719	0	1.49447	Superficial_Epithelial_0dpa
eif5b#chr1:45925098-45926081	chr1:45925098-45926081	TSS	0	eif5b	MA1966.1	chr1:45925947-45925962	-0.0217536	0.0371027	0.108311	tfap4	0.0584647	tfap4->eif5b	1.62556	0.0614703	0	0	0.033836	0.315719	0	1.49447	Superficial_Epithelial_0dpa
elavl1a#chr2:37133351-37134533	chr2:37133351-37134533	TSS	0	elavl1a	MA0746.2	chr2:37134237-37134249	-0.413347	1.97569	0.323548	sp3b	0.0712338	sp3b->elavl1a	2.79745	0.0514086	0	0	0.0996294	0.262159	0	1.2546	Superficial_Epithelial_0dpa
elavl1b#chr11:15000984-15002112	chr11:15000984-15002112	TSS	0	elavl1b	MA0851.1	chr11:15001504-15001520	-0.117465	0.354573	0.0917837	foxj3	0.0770929	foxj3->elavl1b	10.0989	0.082266	0	0	0.643544	0.357635	0	1.18444	Superficial_Epithelial_0dpa
elf1#chr14:40821203-40822285	chr14:40821203-40822285	Body	0.073	elf1	MA1117.1	chr14:40822266-40822276	-0.139042	0.450194	0.0250547	relb	0.127546	relb->elf1	10.6844	0.101586	0	0	0.585144	2.45929	0	2.36939	Superficial_Epithelial_0dpa
elf1#chr14:40821203-40822285	chr14:40821203-40822285	Body	0.073	elf1	MA1117.1	chr14:40821857-40821867	-0.12728	0.778958	0.199775	relb	0.127546	relb->elf1	10.6844	0.101586	0	0	0.585144	2.45929	0	2.36939	Superficial_Epithelial_0dpa
elf1#chr14:40821203-40822285	chr14:40821203-40822285	Body	0.073	elf1	MA1128.1	chr14:40821582-40821594	0.418386	0.316316	0.414502	fosl1a	0.122265	fosl1a->elf1	2.54872	0.0748174	0	0	2.74651	2.45929	0	2.36939	Superficial_Epithelial_0dpa
elf1#chr14:40821203-40822285	chr14:40821203-40822285	Body	0.073	elf1	MA1137.1	chr14:40821582-40821594	0.418386	0.316316	0.414502	fosl1a	0.123797	fosl1a->elf1	2.54872	0.0748174	0	0	2.74651	2.45929	0	2.36939	Superficial_Epithelial_0dpa
elf1#chr14:40821203-40822285	chr14:40821203-40822285	Body	0.073	elf1	MA0477.2	chr14:40821582-40821594	0.418386	0.316316	0.414502	fosl1a	0.126437	fosl1a->elf1	2.54872	0.0748174	0	0	2.74651	2.45929	0	2.36939	Superficial_Epithelial_0dpa
elf1#chr14:40821203-40822285	chr14:40821203-40822285	TSS	0.073	elf1	MA1117.1	chr14:40822266-40822276	-0.139042	0.450194	0.0250547	relb	0.127546	relb->elf1	10.6844	0.101586	0	0	0.585144	2.45929	0	2.36939	Superficial_Epithelial_0dpa
elf1#chr14:40821203-40822285	chr14:40821203-40822285	TSS	0.073	elf1	MA1117.1	chr14:40821857-40821867	-0.12728	0.778958	0.199775	relb	0.127546	relb->elf1	10.6844	0.101586	0	0	0.585144	2.45929	0	2.36939	Superficial_Epithelial_0dpa
elf1#chr14:40821203-40822285	chr14:40821203-40822285	TSS	0.073	elf1	MA1128.1	chr14:40821582-40821594	0.418386	0.316316	0.414502	fosl1a	0.122265	fosl1a->elf1	2.54872	0.0748174	0	0	2.74651	2.45929	0	2.36939	Superficial_Epithelial_0dpa
elf1#chr14:40821203-40822285	chr14:40821203-40822285	TSS	0.073	elf1	MA1137.1	chr14:40821582-40821594	0.418386	0.316316	0.414502	fosl1a	0.123797	fosl1a->elf1	2.54872	0.0748174	0	0	2.74651	2.45929	0	2.36939	Superficial_Epithelial_0dpa
elf1#chr14:40821203-40822285	chr14:40821203-40822285	TSS	0.073	elf1	MA0477.2	chr14:40821582-40821594	0.418386	0.316316	0.414502	fosl1a	0.126437	fosl1a->elf1	2.54872	0.0748174	0	0	2.74651	2.45929	0	2.36939	Superficial_Epithelial_0dpa
elf1#chr14:40849626-40850938	chr14:40849626-40850938	TSS	0	elf1	MA1117.1	chr14:40850834-40850844	-0.115164	0.422337	0.0794877	relb	0.127546	relb->elf1	10.6844	0.101586	0	0	0.585144	2.45929	0	1.73638	Superficial_Epithelial_0dpa
elf1#chr14:40849626-40850938	chr14:40849626-40850938	TSS	0	elf1	MA1117.1	chr14:40850869-40850879	-0.150149	0.133779	0.109674	relb	0.127546	relb->elf1	10.6844	0.101586	0	0	0.585144	2.45929	0	1.73638	Superficial_Epithelial_0dpa
elf3#chr22:660938-662591	chr22:660938-662591	Body	0.058	elf3	MA0101.1	chr22:661417-661426	0.260847	-3.5194	3.73098	rel	0.0845928	rel->elf3	10.8974	0.111104	0	0	0.777053	1.46398	0	2.65568	Superficial_Epithelial_0dpa
elf3#chr22:660938-662591	chr22:660938-662591	Body	0.058	elf3	MA0591.1	chr22:662443-662457	-0.0825323	0.331539	0.033128	bach1b	0.0525138	bach1b->elf3	4.05616	0.0644903	0	0	0.925602	1.46398	0	2.65568	Superficial_Epithelial_0dpa
elf3#chr22:660938-662591	chr22:660938-662591	Body	0.058	elf3	MA1117.1	chr22:661418-661428	0.00599361	-2.92907	3.84173	relb	0.127546	relb->elf3	29.468	0.157998	0	0	0.585144	1.46398	0	2.65568	Superficial_Epithelial_0dpa
elf3#chr22:660938-662591	chr22:660938-662591	Body	0.058	elf3	MA0050.3	chr22:661178-661192	-0.0359856	0.06457	0.473705	irf1b	0.108859	irf1b->elf3	11.5372	0.110976	0	0	0.586434	1.46398	0	2.65568	Superficial_Epithelial_0dpa
elf3#chr22:659323-660382	chr22:659323-660382	Inter	0.068	elf3	MA1126.1	chr22:660022-660037	-0.0665557	0.245724	0.132404	fosab	0.10646	fosab->elf3	13.0379	0.114317	0	0	2.65236	1.46398	0	3.08779	Superficial_Epithelial_0dpa
elf3#chr22:659323-660382	chr22:659323-660382	Inter	0.068	elf3	MA1126.1	chr22:660018-660033	-0.0185162	0.197576	0.0755667	fosab	0.10646	fosab->elf3	13.0379	0.114317	0	0	2.65236	1.46398	0	3.08779	Superficial_Epithelial_0dpa
elf3#chr22:659323-660382	chr22:659323-660382	Inter	0.068	elf3	MA1127.1	chr22:660023-660033	-0.0146827	0.218429	0.12391	fosb	0.150449	fosb->elf3	1.37416	0.0567163	0	0	2.01852	1.46398	0	3.08779	Superficial_Epithelial_0dpa
elf3#chr22:659323-660382	chr22:659323-660382	Inter	0.068	elf3	MA1133.1	chr22:660022-660033	-0.0187763	0.158779	0.111947	jun	0.05518	jun->elf3	18.8047	0.129621	0	0	2.12638	1.46398	0	3.08779	Superficial_Epithelial_0dpa
elf3#chr22:659323-660382	chr22:659323-660382	Inter	0.068	elf3	MA1133.1	chr22:660022-660033	-0.0187763	0.158779	0.111947	junbb	0.090798	junbb->elf3	2.30891	0.0767603	0	0	1.09612	1.46398	0	3.08779	Superficial_Epithelial_0dpa
elf3#chr22:659323-660382	chr22:659323-660382	Inter	0.068	elf3	MA1136.1	chr22:660023-660032	-0.0339664	0.137788	0.143513	fosb	0.133295	fosb->elf3	1.37416	0.0567163	0	0	2.01852	1.46398	0	3.08779	Superficial_Epithelial_0dpa
elf3#chr22:659323-660382	chr22:659323-660382	Inter	0.068	elf3	MA1136.1	chr22:660023-660032	-0.0339664	0.137788	0.143513	junbb	0.0827228	junbb->elf3	2.30891	0.0767603	0	0	1.09612	1.46398	0	3.08779	Superficial_Epithelial_0dpa
elf3#chr22:659323-660382	chr22:659323-660382	Inter	0.068	elf3	MA1136.1	chr22:660023-660032	-0.0339664	0.137788	0.143513	junba	0.0510403	junba->elf3	25.815	0.144145	0	0	1.93563	1.46398	0	3.08779	Superficial_Epithelial_0dpa
elf3#chr22:659323-660382	chr22:659323-660382	Inter	0.068	elf3	MA1140.2	chr22:660022-660033	-0.0187763	0.158779	0.111947	junbb	0.0902616	junbb->elf3	2.30891	0.0767603	0	0	1.09612	1.46398	0	3.08779	Superficial_Epithelial_0dpa
elf3#chr22:660938-662591	chr22:660938-662591	TSS	0.058	elf3	MA0101.1	chr22:661417-661426	0.260847	-3.5194	3.73098	rel	0.0845928	rel->elf3	10.8974	0.111104	0	0	0.777053	1.46398	0	2.65568	Superficial_Epithelial_0dpa
elf3#chr22:660938-662591	chr22:660938-662591	TSS	0.058	elf3	MA0591.1	chr22:662443-662457	-0.0825323	0.331539	0.033128	bach1b	0.0525138	bach1b->elf3	4.05616	0.0644903	0	0	0.925602	1.46398	0	2.65568	Superficial_Epithelial_0dpa
elf3#chr22:660938-662591	chr22:660938-662591	TSS	0.058	elf3	MA1117.1	chr22:661418-661428	0.00599361	-2.92907	3.84173	relb	0.127546	relb->elf3	29.468	0.157998	0	0	0.585144	1.46398	0	2.65568	Superficial_Epithelial_0dpa
elf3#chr22:660938-662591	chr22:660938-662591	TSS	0.058	elf3	MA0050.3	chr22:661178-661192	-0.0359856	0.06457	0.473705	irf1b	0.108859	irf1b->elf3	11.5372	0.110976	0	0	0.586434	1.46398	0	2.65568	Superficial_Epithelial_0dpa
elk3#chr4:7677124-7678679	chr4:7677124-7678679	TSS	0	elk3	MA0028.2	chr4:7678166-7678175	-0.188433	0.914305	0.822165	elk1	0.050474	elk1->elk3	1.73541	0.0595041	0	0	0.111184	0.322853	0	1.65884	Superficial_Epithelial_0dpa
elmsan1b#chr17:37301946-37303750	chr17:37301946-37303750	TSS	0	elmsan1b	MA1527.1	chr17:37302666-37302682	0.452428	0.155615	0.0142659	nfic	0.072754	nfic->elmsan1b	4.41602	0.0867244	0	0	0.510769	0.551612	0	1.51273	Superficial_Epithelial_0dpa
elovl1b#chr11:13125987-13127488	chr11:13125987-13127488	Body	0.245	elovl1b	MA0059.1	chr11:13126563-13126573	-0.0977565	0.135736	0.104009	max	0.0600174	max->elovl1b	4.22447	0.112233	0	0	0.485417	0.505957	0	0.42259	Superficial_Epithelial_0dpa
elovl1b#chr11:13125987-13127488	chr11:13125987-13127488	Body	0.245	elovl1b	MA0746.2	chr11:13126156-13126168	-0.0681017	0.0844593	0.0428823	sp3b	0.0712338	sp3b->elovl1b	1.07865	0.0345481	0	0	0.0996294	0.505957	0	0.42259	Superficial_Epithelial_0dpa
elovl1b#chr11:13151488-13152642	chr11:13151488-13152642	Body	0.188	elovl1b	MA0059.1	chr11:13151975-13151985	-0.348157	0.428437	0.171002	max	0.0600174	max->elovl1b	4.22447	0.112233	0	0	0.485417	0.505957	0	1.82389	Superficial_Epithelial_0dpa
elovl1b#chr11:13151488-13152642	chr11:13151488-13152642	Body	0.188	elovl1b	MA0670.1	chr11:13151827-13151836	0.347442	-0.00690285	0.178139	nfia	0.0599502	nfia->elovl1b	4.52624	0.149257	0	0	0.0965304	0.505957	0	1.82389	Superficial_Epithelial_0dpa
elovl1b#chr11:13151488-13152642	chr11:13151488-13152642	Body	0.188	elovl1b	MA0058.3	chr11:13151975-13151984	-0.251867	0.311017	-0.00422678	max	0.0781341	max->elovl1b	4.22447	0.112233	0	0	0.485417	0.505957	0	1.82389	Superficial_Epithelial_0dpa
elovl1b#chr11:13151488-13152642	chr11:13151488-13152642	Body	0.188	elovl1b	MA0058.3	chr11:13151975-13151984	-0.251867	0.311017	-0.00422678	max	0.0781341	max->elovl1b	4.22447	0.112233	0	0	0.485417	0.505957	0	1.82389	Superficial_Epithelial_0dpa
elovl1b#chr11:13151488-13152642	chr11:13151488-13152642	Body	0.188	elovl1b	MA0147.3	chr11:13151974-13151985	-0.260431	0.404983	0.0939428	mycb	0.052455	mycb->elovl1b	1.87706	0.0882677	0	0	0.281657	0.505957	0	1.82389	Superficial_Epithelial_0dpa
elovl1b#chr11:13151488-13152642	chr11:13151488-13152642	Body	0.188	elovl1b	MA0746.2	chr11:13152352-13152364	-0.699711	1.519	1.02454	sp3b	0.0712338	sp3b->elovl1b	1.07865	0.0345481	0	0	0.0996294	0.505957	0	1.82389	Superficial_Epithelial_0dpa
elovl1b#chr11:13125987-13127488	chr11:13125987-13127488	TSS	0.245	elovl1b	MA0059.1	chr11:13126563-13126573	-0.0977565	0.135736	0.104009	max	0.0600174	max->elovl1b	4.22447	0.112233	0	0	0.485417	0.505957	0	0.42259	Superficial_Epithelial_0dpa
elovl1b#chr11:13125987-13127488	chr11:13125987-13127488	TSS	0.245	elovl1b	MA0746.2	chr11:13126156-13126168	-0.0681017	0.0844593	0.0428823	sp3b	0.0712338	sp3b->elovl1b	1.07865	0.0345481	0	0	0.0996294	0.505957	0	0.42259	Superficial_Epithelial_0dpa
elovl1b#chr11:13151488-13152642	chr11:13151488-13152642	TSS	0.188	elovl1b	MA0059.1	chr11:13151975-13151985	-0.348157	0.428437	0.171002	max	0.0600174	max->elovl1b	4.22447	0.112233	0	0	0.485417	0.505957	0	1.82389	Superficial_Epithelial_0dpa
elovl1b#chr11:13151488-13152642	chr11:13151488-13152642	TSS	0.188	elovl1b	MA0670.1	chr11:13151827-13151836	0.347442	-0.00690285	0.178139	nfia	0.0599502	nfia->elovl1b	4.52624	0.149257	0	0	0.0965304	0.505957	0	1.82389	Superficial_Epithelial_0dpa
elovl1b#chr11:13151488-13152642	chr11:13151488-13152642	TSS	0.188	elovl1b	MA0058.3	chr11:13151975-13151984	-0.251867	0.311017	-0.00422678	max	0.0781341	max->elovl1b	4.22447	0.112233	0	0	0.485417	0.505957	0	1.82389	Superficial_Epithelial_0dpa
elovl1b#chr11:13151488-13152642	chr11:13151488-13152642	TSS	0.188	elovl1b	MA0058.3	chr11:13151975-13151984	-0.251867	0.311017	-0.00422678	max	0.0781341	max->elovl1b	4.22447	0.112233	0	0	0.485417	0.505957	0	1.82389	Superficial_Epithelial_0dpa
elovl1b#chr11:13151488-13152642	chr11:13151488-13152642	TSS	0.188	elovl1b	MA0147.3	chr11:13151974-13151985	-0.260431	0.404983	0.0939428	mycb	0.052455	mycb->elovl1b	1.87706	0.0882677	0	0	0.281657	0.505957	0	1.82389	Superficial_Epithelial_0dpa
elovl1b#chr11:13151488-13152642	chr11:13151488-13152642	TSS	0.188	elovl1b	MA0746.2	chr11:13152352-13152364	-0.699711	1.519	1.02454	sp3b	0.0712338	sp3b->elovl1b	1.07865	0.0345481	0	0	0.0996294	0.505957	0	1.82389	Superficial_Epithelial_0dpa
elovl6#chr14:36246382-36248195	chr14:36246382-36248195	Body	0.058	elovl6	MA1130.1	chr14:36247637-36247648	-0.0157167	0.162404	-0.0558212	fosl2	0.0837069	fosl2->elovl6	6.44874	0.0753041	0	0	1.62846	0.56328	0	2.32799	Superficial_Epithelial_0dpa
elovl6#chr14:36246382-36248195	chr14:36246382-36248195	TSS	0.058	elovl6	MA1130.1	chr14:36247637-36247648	-0.0157167	0.162404	-0.0558212	fosl2	0.0837069	fosl2->elovl6	6.44874	0.0753041	0	0	1.62846	0.56328	0	2.32799	Superficial_Epithelial_0dpa
elovl6l#chr13:21671657-21673123	chr13:21671657-21673123	TSS	0	elovl6l	MA0464.2	chr13:21672735-21672744	-0.597058	1.04596	0.598866	bhlhe40	0.0593062	bhlhe40->elovl6l	1.69155	0.0753236	0	0	1.1581	1.67715	0	3.03619	Superficial_Epithelial_0dpa
elovl6l#chr13:21671657-21673123	chr13:21671657-21673123	TSS	0	elovl6l	MA0464.2	chr13:21672735-21672744	-0.597058	1.04596	0.598866	bhlhe40	0.0593062	bhlhe40->elovl6l	1.69155	0.0753236	0	0	1.1581	1.67715	0	3.03619	Superficial_Epithelial_0dpa
enah#chr20:36558712-36560174	chr20:36558712-36560174	TSS	0	enah	MA0073.1	chr20:36558927-36558946	-0.0739073	0.107987	0.0967402	rreb1a	0.0500665	rreb1a->enah	1.41761	0.0712488	0	0	0.266798	0.76418	0	2.68859	Superficial_Epithelial_0dpa
enah#chr20:36558712-36560174	chr20:36558712-36560174	TSS	0	enah	MA0481.3	chr20:36558985-36558995	-0.0911969	0.147182	0.0593629	foxp1a	0.0835482	foxp1a->enah	2.07331	0.082642	0	0	0.460207	0.76418	0	2.68859	Superficial_Epithelial_0dpa
enah#chr20:36615672-36617508	chr20:36615672-36617508	TSS	0	enah	MA0073.1	chr20:36616683-36616702	-0.0800017	0.106852	0.0826866	rreb1a	0.0500665	rreb1a->enah	1.41761	0.0712488	0	0	0.266798	0.76418	0	1.82987	Superficial_Epithelial_0dpa
enah#chr20:36615672-36617508	chr20:36615672-36617508	TSS	0	enah	MA0073.1	chr20:36616685-36616704	-0.087585	0.112834	0.0940573	rreb1a	0.0500665	rreb1a->enah	1.41761	0.0712488	0	0	0.266798	0.76418	0	1.82987	Superficial_Epithelial_0dpa
enah#chr20:36615672-36617508	chr20:36615672-36617508	TSS	0	enah	MA0073.1	chr20:36616687-36616706	-0.0955212	0.119599	0.108823	rreb1a	0.0500665	rreb1a->enah	1.41761	0.0712488	0	0	0.266798	0.76418	0	1.82987	Superficial_Epithelial_0dpa
enah#chr20:36615672-36617508	chr20:36615672-36617508	TSS	0	enah	MA0073.1	chr20:36616689-36616708	-0.114931	0.142459	0.135071	rreb1a	0.0500665	rreb1a->enah	1.41761	0.0712488	0	0	0.266798	0.76418	0	1.82987	Superficial_Epithelial_0dpa
enah#chr20:36615672-36617508	chr20:36615672-36617508	TSS	0	enah	MA0073.1	chr20:36616691-36616710	-0.10985	0.129713	0.133021	rreb1a	0.0500665	rreb1a->enah	1.41761	0.0712488	0	0	0.266798	0.76418	0	1.82987	Superficial_Epithelial_0dpa
enah#chr20:36615672-36617508	chr20:36615672-36617508	TSS	0	enah	MA0073.1	chr20:36616693-36616712	-0.070869	0.0918689	0.0809885	rreb1a	0.0500665	rreb1a->enah	1.41761	0.0712488	0	0	0.266798	0.76418	0	1.82987	Superficial_Epithelial_0dpa
enah#chr20:36615672-36617508	chr20:36615672-36617508	TSS	0	enah	MA0073.1	chr20:36616695-36616714	-0.0769704	0.0925943	0.0886764	rreb1a	0.0500665	rreb1a->enah	1.41761	0.0712488	0	0	0.266798	0.76418	0	1.82987	Superficial_Epithelial_0dpa
enah#chr20:36615672-36617508	chr20:36615672-36617508	TSS	0	enah	MA0073.1	chr20:36616697-36616716	-0.0614628	0.0699112	0.0722613	rreb1a	0.0500665	rreb1a->enah	1.41761	0.0712488	0	0	0.266798	0.76418	0	1.82987	Superficial_Epithelial_0dpa
enah#chr20:36615672-36617508	chr20:36615672-36617508	TSS	0	enah	MA0073.1	chr20:36616699-36616718	-0.0554214	0.0614879	0.0677268	rreb1a	0.0500665	rreb1a->enah	1.41761	0.0712488	0	0	0.266798	0.76418	0	1.82987	Superficial_Epithelial_0dpa
endou2#chr21:41868099-41869407	chr21:41868099-41869407	TSS	0	endou2	MA1954.1	chr21:41868453-41868466	-0.0380157	0.130598	0.396303	elk1	0.0522443	elk1->endou2	3.34903	0.0335303	0	0	0.111184	0.00780222	0	4.19313	Superficial_Epithelial_0dpa
eno1b#chr6:40661279-40662482	chr6:40661279-40662482	TSS	0	eno1b	MA0144.2	chr6:40662141-40662151	-0.0311464	0.0718721	0.103222	stat3	0.0671814	stat3->eno1b	1.14381	0.0428416	0	0	0.981733	0.0026811	0	1.17669	Superficial_Epithelial_0dpa
eno1b#chr6:40661279-40662482	chr6:40661279-40662482	TSS	0	eno1b	MA0144.2	chr6:40662141-40662151	-0.0311464	0.0718721	0.103222	stat3	0.0671814	stat3->eno1b	1.14381	0.0428416	0	0	0.981733	0.0026811	0	1.17669	Superficial_Epithelial_0dpa
eno1b#chr6:40661279-40662482	chr6:40661279-40662482	TSS	0	eno1b	MA0147.3	chr6:40661499-40661510	-0.47192	0.779153	0.705553	mycb	0.052455	mycb->eno1b	1.63846	0.0394608	0	0	0.281657	0.0026811	0	1.17669	Superficial_Epithelial_0dpa
eno1b#chr6:40661279-40662482	chr6:40661279-40662482	TSS	0	eno1b	MA0147.3	chr6:40662023-40662034	-0.188541	0.336398	0.57167	mycb	0.052455	mycb->eno1b	1.63846	0.0394608	0	0	0.281657	0.0026811	0	1.17669	Superficial_Epithelial_0dpa
ensaa#chr19:341733-342478	chr19:341733-342478	TSS	0	ensaa	MA0746.2	chr19:341968-341980	0.208665	0.976773	0.496283	sp3b	0.0712338	sp3b->ensaa	1.20576	0.0370897	0	0	0.0996294	0.0124493	0	1.6885	Superficial_Epithelial_0dpa
entpd2a.1#chr5:29583967-29585121	chr5:29583967-29585121	Body	0.139	entpd2a.1	MA0525.2	chr5:29584731-29584748	-0.0114723	0.112508	0.0793036	tp63	0.180472	tp63->entpd2a.1	16.5329	0.176303	0	0	0.439364	0.489931	0	1.00538	Superficial_Epithelial_0dpa
entpd2a.1#chr5:29587006-29587963	chr5:29587006-29587963	Body	0.164	entpd2a.1	MA0754.2	chr5:29587086-29587095	-0.267442	0.213645	0.378436	cux1a	0.0818688	cux1a->entpd2a.1	4.28978	0.0977881	0	0	0.677537	0.489931	0	2.37699	Superficial_Epithelial_0dpa
entpd2a.1#chr5:29587006-29587963	chr5:29587006-29587963	TSS	0.164	entpd2a.1	MA0754.2	chr5:29587086-29587095	-0.267442	0.213645	0.378436	cux1a	0.0818688	cux1a->entpd2a.1	4.28978	0.0977881	0	0	0.677537	0.489931	0	2.37699	Superficial_Epithelial_0dpa
entpd6#chr17:21101719-21103328	chr17:21101719-21103328	TSS	0	entpd6	MA1139.1	chr17:21102285-21102296	0.102522	0.72115	0.311616	fosl2	0.0569617	fosl2->entpd6	1.9217	0.0566039	0	0	1.62846	1.17923	0	2.4402	Superficial_Epithelial_0dpa
entpd6#chr17:21101719-21103328	chr17:21101719-21103328	TSS	0	entpd6	MA1139.1	chr17:21102285-21102296	0.102522	0.72115	0.311616	fosl2	0.0569617	fosl2->entpd6	1.9217	0.0566039	0	0	1.62846	1.17923	0	2.4402	Superficial_Epithelial_0dpa
epb41l4a#chr10:1826921-1827929	chr10:1826921-1827929	TSS	0	epb41l4a	MA0734.3	chr10:1827141-1827153	-0.0327972	0.0293239	0.118856	gli2a	0.101933	gli2a->epb41l4a	2.26292	0.0925531	0	0	0.0506187	0.105968	0	1.59799	Superficial_Epithelial_0dpa
epb41l4b#chr16:26600588-26602107	chr16:26600588-26602107	TSS	0	epb41l4b	MA1509.1	chr16:26600984-26600992	-0.0535426	0.945874	0.539535	irf6	0.0899394	irf6->epb41l4b	10.4509	0.0987222	0	0	0.476886	1.32694	0	2.0541	Superficial_Epithelial_0dpa
epb41l4b#chr16:26600588-26602107	chr16:26600588-26602107	TSS	0	epb41l4b	MA0522.3	chr16:26601484-26601494	-0.173629	0.348954	0.253742	tcf3a	0.0820155	tcf3a->epb41l4b	2.24545	0.0747445	0	0	0.450357	1.32694	0	2.0541	Superficial_Epithelial_0dpa
epcam#chr13:8838515-8839604	chr13:8838515-8839604	Inter	0.051	epcam	MA1509.1	chr13:8839162-8839170	0.487927	3.31337	0.00982909	irf6	0.0899394	irf6->epcam	1.77193	0.0909038	0	0	0.476886	3.32263	0	2.58112	Superficial_Epithelial_0dpa
epcam#chr13:8843577-8845420	chr13:8843577-8845420	Inter	0.095	epcam	MA1128.1	chr13:8845363-8845375	-0.0556201	0.101274	0.0474951	fosl1a	0.122265	fosl1a->epcam	32.5363	0.18211	0	0	2.74651	3.32263	0	2.59525	Superficial_Epithelial_0dpa
epcam#chr13:8843577-8845420	chr13:8843577-8845420	Inter	0.095	epcam	MA1137.1	chr13:8845363-8845375	-0.0556201	0.101274	0.0474951	fosl1a	0.123797	fosl1a->epcam	32.5363	0.18211	0	0	2.74651	3.32263	0	2.59525	Superficial_Epithelial_0dpa
epcam#chr13:8843577-8845420	chr13:8843577-8845420	Inter	0.095	epcam	MA1509.1	chr13:8843654-8843662	-0.0302103	0.367788	0.495533	irf6	0.0899394	irf6->epcam	1.77193	0.0909038	0	0	0.476886	3.32263	0	2.59525	Superficial_Epithelial_0dpa
epcam#chr13:8843577-8845420	chr13:8843577-8845420	Inter	0.095	epcam	MA0477.2	chr13:8845363-8845375	-0.0556201	0.101274	0.0474951	fosl1a	0.126437	fosl1a->epcam	32.5363	0.18211	0	0	2.74651	3.32263	0	2.59525	Superficial_Epithelial_0dpa
epcam#chr13:8840407-8841526	chr13:8840407-8841526	TSS	0	epcam	MA1140.2	chr13:8840812-8840823	0.391767	0.95448	-0.826205	junbb	0.0902616	junbb->epcam	12.2628	0.161383	0	0	1.09612	3.32263	0	2.44569	Superficial_Epithelial_0dpa
epgn#chr8:32402821-32404672	chr8:32402821-32404672	TSS	0	epgn	MA1101.2	chr8:32403430-32403448	-0.0237867	0.0605508	0.0533121	bach2b	0.0657534	bach2b->epgn	1.28666	0.0845531	0	0	0.209666	0.217284	0	2.45914	Superficial_Epithelial_0dpa
epha2a#chr6:45915902-45916886	chr6:45915902-45916886	Inter	0.061	epha2a	MA0522.3	chr6:45915980-45915990	-0.582535	0.962691	0.674992	tcf3a	0.0820155	tcf3a->epha2a	1.9614	0.0786871	0	0	0.450357	1.31189	0	1.58614	Superficial_Epithelial_0dpa
epha2a#chr6:45904490-45906158	chr6:45904490-45906158	TSS	0	epha2a	MA0478.1	chr6:45904925-45904935	-0.0732625	0.799492	0.31377	fosl2	0.0934041	fosl2->epha2a	1.8962	0.0660857	0	0	1.62846	1.31189	0	1.72693	Superficial_Epithelial_0dpa
epha2a#chr6:45904490-45906158	chr6:45904490-45906158	TSS	0	epha2a	MA1128.1	chr6:45904925-45904937	0.149319	0.556961	0.0879252	fosl1a	0.122265	fosl1a->epha2a	8.46045	0.0892281	0	0	2.74651	1.31189	0	1.72693	Superficial_Epithelial_0dpa
epha2a#chr6:45904490-45906158	chr6:45904490-45906158	TSS	0	epha2a	MA1128.1	chr6:45905318-45905330	-0.0476683	0.0113119	0.112066	fosl1a	0.122265	fosl1a->epha2a	8.46045	0.0892281	0	0	2.74651	1.31189	0	1.72693	Superficial_Epithelial_0dpa
epha2a#chr6:45904490-45906158	chr6:45904490-45906158	TSS	0	epha2a	MA1130.1	chr6:45904926-45904937	0.090622	0.615876	0.0721822	fosl2	0.0837069	fosl2->epha2a	1.8962	0.0660857	0	0	1.62846	1.31189	0	1.72693	Superficial_Epithelial_0dpa
epha2a#chr6:45904490-45906158	chr6:45904490-45906158	TSS	0	epha2a	MA1137.1	chr6:45904925-45904937	0.149319	0.556961	0.0879252	fosl1a	0.123797	fosl1a->epha2a	8.46045	0.0892281	0	0	2.74651	1.31189	0	1.72693	Superficial_Epithelial_0dpa
epha2a#chr6:45904490-45906158	chr6:45904490-45906158	TSS	0	epha2a	MA1137.1	chr6:45905318-45905330	-0.0476683	0.0113119	0.112066	fosl1a	0.123797	fosl1a->epha2a	8.46045	0.0892281	0	0	2.74651	1.31189	0	1.72693	Superficial_Epithelial_0dpa
epha2a#chr6:45904490-45906158	chr6:45904490-45906158	TSS	0	epha2a	MA1138.1	chr6:45904926-45904935	-0.165958	0.919948	0.301386	fosl2	0.084033	fosl2->epha2a	1.8962	0.0660857	0	0	1.62846	1.31189	0	1.72693	Superficial_Epithelial_0dpa
epha2a#chr6:45904490-45906158	chr6:45904490-45906158	TSS	0	epha2a	MA1142.1	chr6:45904926-45904935	-0.165958	0.919948	0.301386	fosl1a	0.132058	fosl1a->epha2a	8.46045	0.0892281	0	0	2.74651	1.31189	0	1.72693	Superficial_Epithelial_0dpa
epha2a#chr6:45904490-45906158	chr6:45904490-45906158	TSS	0	epha2a	MA1144.1	chr6:45904926-45904935	-0.165958	0.919948	0.301386	fosl2	0.0824373	fosl2->epha2a	1.8962	0.0660857	0	0	1.62846	1.31189	0	1.72693	Superficial_Epithelial_0dpa
epha2a#chr6:45904490-45906158	chr6:45904490-45906158	TSS	0	epha2a	MA0477.2	chr6:45904925-45904937	0.149319	0.556961	0.0879252	fosl1a	0.126437	fosl1a->epha2a	8.46045	0.0892281	0	0	2.74651	1.31189	0	1.72693	Superficial_Epithelial_0dpa
epha2a#chr6:45904490-45906158	chr6:45904490-45906158	TSS	0	epha2a	MA1633.2	chr6:45904927-45904935	-0.312346	1.16437	0.536503	bach1b	0.0601907	bach1b->epha2a	1.2264	0.0556057	0	0	0.925602	1.31189	0	1.72693	Superficial_Epithelial_0dpa
epha2b#chr23:24375236-24376478	chr23:24375236-24376478	Body	0.083	epha2b	MA0795.1	chr23:24375475-24375484	-0.0727699	0.0623797	0.140335	smad3a	0.0894726	smad3a->epha2b	1.43095	0.0552771	0	0	0.331042	0.247874	0	1.92753	Superficial_Epithelial_0dpa
epha2b#chr23:24375236-24376478	chr23:24375236-24376478	Body	0.083	epha2b	MA0795.1	chr23:24375475-24375484	-0.0727699	0.0623797	0.140335	smad3a	0.0894726	smad3a->epha2b	1.43095	0.0552771	0	0	0.331042	0.247874	0	1.92753	Superficial_Epithelial_0dpa
epha2b#chr23:24392926-24395042	chr23:24392926-24395042	Body	0.073	epha2b	MA0742.2	chr23:24394829-24394837	0.954556	1.19573	-0.866981	klf12b	0.0830955	klf12b->epha2b	2.47509	0.0704302	0	0	0.00592045	0.247874	0	1.54286	Superficial_Epithelial_0dpa
epha2b#chr23:24392926-24395042	chr23:24392926-24395042	TSS	0.073	epha2b	MA0742.2	chr23:24394829-24394837	0.954556	1.19573	-0.866981	klf12b	0.0830955	klf12b->epha2b	2.47509	0.0704302	0	0	0.00592045	0.247874	0	1.54286	Superficial_Epithelial_0dpa
epha4a#chr2:40096480-40097874	chr2:40096480-40097874	Body	0.119	epha4a	MA1101.2	chr2:40097282-40097300	-0.0938552	0.0598608	0.183413	bach2b	0.0657534	bach2b->epha4a	3.35693	0.168059	0	0	0.209666	0.023833	0	0.173758	Superficial_Epithelial_0dpa
epha7#chr20:24949409-24950541	chr20:24949409-24950541	Body	0.18	epha7	MA0734.3	chr20:24950057-24950069	-0.046789	0.0562886	0.0514935	gli2a	0.101933	gli2a->epha7	17.9486	0.254152	0	0	0.0506187	0.370969	0	0.126906	Superficial_Epithelial_0dpa
ephb4b#chr23:44349016-44349961	chr23:44349016-44349961	Body	0.067	ephb4b	MA0600.2	chr23:44349157-44349172	0.00353146	0.043619	0.853082	rfx2	0.076513	rfx2->ephb4b	1.82045	0.0641792	0	0	0.545874	0.369137	0	1.52617	Superficial_Epithelial_0dpa
ephb4b#chr23:44349016-44349961	chr23:44349016-44349961	Body	0.067	ephb4b	MA0600.2	chr23:44349157-44349172	0.00353146	0.043619	0.853082	rfx2	0.076513	rfx2->ephb4b	1.82045	0.0641792	0	0	0.545874	0.369137	0	1.52617	Superficial_Epithelial_0dpa
ephb4b#chr23:44349016-44349961	chr23:44349016-44349961	TSS	0.067	ephb4b	MA0600.2	chr23:44349157-44349172	0.00353146	0.043619	0.853082	rfx2	0.076513	rfx2->ephb4b	1.82045	0.0641792	0	0	0.545874	0.369137	0	1.52617	Superficial_Epithelial_0dpa
ephb4b#chr23:44349016-44349961	chr23:44349016-44349961	TSS	0.067	ephb4b	MA0600.2	chr23:44349157-44349172	0.00353146	0.043619	0.853082	rfx2	0.076513	rfx2->ephb4b	1.82045	0.0641792	0	0	0.545874	0.369137	0	1.52617	Superficial_Epithelial_0dpa
ephb6#chr16:12469016-12470871	chr16:12469016-12470871	Body	0.138	ephb6	MA0144.2	chr16:12470641-12470651	-0.0206027	0.382051	-0.108512	stat3	0.0671814	stat3->ephb6	3.62	0.110836	0	0	0.981733	0.503111	0	1.23408	Superficial_Epithelial_0dpa
ephb6#chr16:12469016-12470871	chr16:12469016-12470871	Body	0.138	ephb6	MA1101.2	chr16:12469300-12469318	-0.0279625	0.0218388	0.180321	bach2b	0.0657534	bach2b->ephb6	12.6438	0.14185	0	0	0.209666	0.503111	0	1.23408	Superficial_Epithelial_0dpa
ephb6#chr16:12469016-12470871	chr16:12469016-12470871	TSS	0.138	ephb6	MA0144.2	chr16:12470641-12470651	-0.0206027	0.382051	-0.108512	stat3	0.0671814	stat3->ephb6	3.62	0.110836	0	0	0.981733	0.503111	0	1.23408	Superficial_Epithelial_0dpa
ephb6#chr16:12469016-12470871	chr16:12469016-12470871	TSS	0.138	ephb6	MA1101.2	chr16:12469300-12469318	-0.0279625	0.0218388	0.180321	bach2b	0.0657534	bach2b->ephb6	12.6438	0.14185	0	0	0.209666	0.503111	0	1.23408	Superficial_Epithelial_0dpa
epn2#chr3:39662583-39663886	chr3:39662583-39663886	Body	0.068	epn2	MA0734.3	chr3:39663702-39663714	-0.0618346	0.0613997	0.100615	gli2a	0.101933	gli2a->epn2	1.2224	0.0587233	0	0	0.0506187	0.895758	0	0.883279	Superficial_Epithelial_0dpa
epn2#chr3:39662583-39663886	chr3:39662583-39663886	TSS	0.068	epn2	MA0734.3	chr3:39663702-39663714	-0.0618346	0.0613997	0.100615	gli2a	0.101933	gli2a->epn2	1.2224	0.0587233	0	0	0.0506187	0.895758	0	0.883279	Superficial_Epithelial_0dpa
eps8l2#chr25:4023096-4023735	chr25:4023096-4023735	Body	0.163	eps8l2	MA1116.1	chr25:4023542-4023551	0.140603	0.334708	-0.0453768	rbpjb	0.0631204	rbpjb->eps8l2	10.9972	0.150054	0	0	0.343833	1.7427	0	8.15667	Superficial_Epithelial_0dpa
epsti1#chr9:18215044-18216632	chr9:18215044-18216632	TSS	0	epsti1	MA0101.1	chr9:18215755-18215764	0.216903	0.676212	-0.387208	rel	0.0845928	rel->epsti1	7.09216	0.0812648	0	0	0.777053	0.665176	0	1.7284	Superficial_Epithelial_0dpa
epsti1#chr9:18215044-18216632	chr9:18215044-18216632	TSS	0	epsti1	MA0517.1	chr9:18215185-18215199	-0.107187	0.126803	0.226258	stat1a	0.0569912	stat1a->epsti1	12.583	0.106854	0	0	1.21024	0.665176	0	1.7284	Superficial_Epithelial_0dpa
epsti1#chr9:18215044-18216632	chr9:18215044-18216632	TSS	0	epsti1	MA0517.1	chr9:18215185-18215199	-0.107187	0.126803	0.226258	stat1b	0.151583	stat1b->epsti1	27.2652	0.13521	0	0	0.572188	0.665176	0	1.7284	Superficial_Epithelial_0dpa
epsti1#chr9:18215044-18216632	chr9:18215044-18216632	TSS	0	epsti1	MA0517.1	chr9:18215218-18215232	-0.0447481	0.190491	0.0292762	stat1a	0.0569912	stat1a->epsti1	12.583	0.106854	0	0	1.21024	0.665176	0	1.7284	Superficial_Epithelial_0dpa
epsti1#chr9:18215044-18216632	chr9:18215044-18216632	TSS	0	epsti1	MA0517.1	chr9:18215218-18215232	-0.0447481	0.190491	0.0292762	stat1b	0.151583	stat1b->epsti1	27.2652	0.13521	0	0	0.572188	0.665176	0	1.7284	Superficial_Epithelial_0dpa
epsti1#chr9:18215044-18216632	chr9:18215044-18216632	TSS	0	epsti1	MA0653.1	chr9:18215216-18215230	-0.0291597	0.16867	0.0105553	irf9	0.0507077	irf9->epsti1	5.9597	0.0789535	0	0	0.4291	0.665176	0	1.7284	Superficial_Epithelial_0dpa
epsti1#chr9:18215044-18216632	chr9:18215044-18216632	TSS	0	epsti1	MA0653.1	chr9:18216376-18216390	0.00748371	0.0736152	0.0282018	irf9	0.0507077	irf9->epsti1	5.9597	0.0789535	0	0	0.4291	0.665176	0	1.7284	Superficial_Epithelial_0dpa
epsti1#chr9:18215044-18216632	chr9:18215044-18216632	TSS	0	epsti1	MA0653.1	chr9:18215187-18215201	-0.202331	0.227891	0.339748	irf9	0.0507077	irf9->epsti1	5.9597	0.0789535	0	0	0.4291	0.665176	0	1.7284	Superficial_Epithelial_0dpa
epsti1#chr9:18215044-18216632	chr9:18215044-18216632	TSS	0	epsti1	MA0772.1	chr9:18215217-18215230	-0.0303198	0.18138	0.0118674	irf7	0.0852944	irf7->epsti1	16.5327	0.114861	0	0	0.785997	0.665176	0	1.7284	Superficial_Epithelial_0dpa
epsti1#chr9:18215044-18216632	chr9:18215044-18216632	TSS	0	epsti1	MA1117.1	chr9:18215756-18215766	-0.0309278	0.94096	-0.130445	relb	0.127546	relb->epsti1	12.9617	0.102379	0	0	0.585144	0.665176	0	1.7284	Superficial_Epithelial_0dpa
epsti1#chr9:18215044-18216632	chr9:18215044-18216632	TSS	0	epsti1	MA0050.3	chr9:18215216-18215230	-0.0291597	0.16867	0.0105553	irf1b	0.108859	irf1b->epsti1	12.5221	0.108321	0	0	0.586434	0.665176	0	1.7284	Superficial_Epithelial_0dpa
epsti1#chr9:18215044-18216632	chr9:18215044-18216632	TSS	0	epsti1	MA0050.3	chr9:18215187-18215201	-0.202331	0.227891	0.339748	irf1b	0.108859	irf1b->epsti1	12.5221	0.108321	0	0	0.586434	0.665176	0	1.7284	Superficial_Epithelial_0dpa
erbb3a#chr6:7465876-7466966	chr6:7465876-7466966	TSS	0	erbb3a	MA0481.3	chr6:7466083-7466093	0.164608	-0.0605582	0.50581	foxp1a	0.0835482	foxp1a->erbb3a	1.42961	0.0589704	0	0	0.460207	1.63985	0	2.61365	Superficial_Epithelial_0dpa
erbb3a#chr6:7465876-7466966	chr6:7465876-7466966	TSS	0	erbb3a	MA1955.1	chr6:7466193-7466206	-0.752757	1.6808	1.37302	elk3	0.0570459	elk3->erbb3a	5.47868	0.081528	0	0	0.322853	1.63985	0	2.61365	Superficial_Epithelial_0dpa
erbin#chr10:15454796-15456368	chr10:15454796-15456368	TSS	0	erbin	MA0598.3	chr10:15455883-15455897	-0.0484954	0.133787	0.27999	ehf	0.0681254	ehf->erbin	3.67578	0.0666189	0	0	0.212191	0.926275	0	1.46188	Superficial_Epithelial_0dpa
ERC1#chr4:8197206-8198187	chr4:8197206-8198187	Inter	0.149	ERC1	MA1470.1	chr4:8197655-8197674	-0.106565	0.13879	0.0811977	bach2b	0.193379	bach2b->ERC1	19.746	0.266844	0	0	0.209666	0.0459242	0	0.71408	Superficial_Epithelial_0dpa
erfl3#chr16:11031101-11031380	chr16:11031101-11031380	Body	0.07	erfl3	MA0525.2	chr16:11031223-11031240	-0.0773019	0.0745918	0.0427663	tp63	0.180472	tp63->erfl3	2.68207	0.0907637	0	0	0.439364	0.947826	0	0.534982	Superficial_Epithelial_0dpa
erfl3#chr16:11031101-11031380	chr16:11031101-11031380	Body	0.07	erfl3	MA0525.2	chr16:11031223-11031240	-0.0773019	0.0745918	0.0427663	tp63	0.180472	tp63->erfl3	2.68207	0.0907637	0	0	0.439364	0.947826	0	0.534982	Superficial_Epithelial_0dpa
erfl3#chr16:11050523-11051671	chr16:11050523-11051671	Body	0.099	erfl3	MA1515.1	chr16:11050946-11050956	0.0436516	0.291994	-0.0912082	klf2b	0.107486	klf2b->erfl3	2.32006	0.0549945	0	0	1.42664	0.947826	0	1.40124	Superficial_Epithelial_0dpa
ern1#chr3:55478102-55478959	chr3:55478102-55478959	TSS	0	ern1	MA1127.1	chr3:55478700-55478710	0.175481	0.128166	0.0274277	fosb	0.150449	fosb->ern1	1.77011	0.0531458	0	0	2.01852	0.667522	0	1.76382	Superficial_Epithelial_0dpa
ern1#chr3:55478102-55478959	chr3:55478102-55478959	TSS	0	ern1	MA1136.1	chr3:55478700-55478709	0.142241	0.262771	0.130346	fosb	0.133295	fosb->ern1	1.77011	0.0531458	0	0	2.01852	0.667522	0	1.76382	Superficial_Epithelial_0dpa
ern1#chr3:55478102-55478959	chr3:55478102-55478959	TSS	0	ern1	MA1136.1	chr3:55478700-55478709	0.142241	0.262771	0.130346	fosb	0.133295	fosb->ern1	1.77011	0.0531458	0	0	2.01852	0.667522	0	1.76382	Superficial_Epithelial_0dpa
errfi1a#chr11:40831257-40832669	chr11:40831257-40832669	TSS	0	errfi1a	MA0478.1	chr11:40832324-40832334	-0.406717	1.63212	0.636454	fosl2	0.0934041	fosl2->errfi1a	20.752	0.138988	0	0	1.62846	1.24837	0	2.24061	Superficial_Epithelial_0dpa
errfi1a#chr11:40831257-40832669	chr11:40831257-40832669	TSS	0	errfi1a	MA0478.1	chr11:40832326-40832336	-0.297999	1.46419	0.460405	fosl2	0.0934041	fosl2->errfi1a	20.752	0.138988	0	0	1.62846	1.24837	0	2.24061	Superficial_Epithelial_0dpa
errfi1a#chr11:40831257-40832669	chr11:40831257-40832669	TSS	0	errfi1a	MA1128.1	chr11:40832324-40832336	-0.342684	1.45855	0.622596	fosl1a	0.122265	fosl1a->errfi1a	20.1679	0.138492	0	0	2.74651	1.24837	0	2.24061	Superficial_Epithelial_0dpa
errfi1a#chr11:40831257-40832669	chr11:40831257-40832669	TSS	0	errfi1a	MA1130.1	chr11:40832325-40832336	-0.273166	1.35946	0.652257	fosl2	0.0837069	fosl2->errfi1a	20.752	0.138988	0	0	1.62846	1.24837	0	2.24061	Superficial_Epithelial_0dpa
errfi1a#chr11:40831257-40832669	chr11:40831257-40832669	TSS	0	errfi1a	MA1137.1	chr11:40832324-40832336	-0.342684	1.45855	0.622596	fosl1a	0.123797	fosl1a->errfi1a	20.1679	0.138492	0	0	2.74651	1.24837	0	2.24061	Superficial_Epithelial_0dpa
errfi1a#chr11:40831257-40832669	chr11:40831257-40832669	TSS	0	errfi1a	MA1138.1	chr11:40832325-40832334	-0.329698	1.61251	0.663133	fosl2	0.084033	fosl2->errfi1a	20.752	0.138988	0	0	1.62846	1.24837	0	2.24061	Superficial_Epithelial_0dpa
errfi1a#chr11:40831257-40832669	chr11:40831257-40832669	TSS	0	errfi1a	MA1138.1	chr11:40832326-40832335	-0.329698	1.53214	0.63661	fosl2	0.084033	fosl2->errfi1a	20.752	0.138988	0	0	1.62846	1.24837	0	2.24061	Superficial_Epithelial_0dpa
errfi1a#chr11:40831257-40832669	chr11:40831257-40832669	TSS	0	errfi1a	MA1142.1	chr11:40832325-40832334	-0.329698	1.61251	0.663133	fosl1a	0.132058	fosl1a->errfi1a	20.1679	0.138492	0	0	2.74651	1.24837	0	2.24061	Superficial_Epithelial_0dpa
errfi1a#chr11:40831257-40832669	chr11:40831257-40832669	TSS	0	errfi1a	MA1144.1	chr11:40832325-40832334	-0.329698	1.61251	0.663133	fosl2	0.0824373	fosl2->errfi1a	20.752	0.138988	0	0	1.62846	1.24837	0	2.24061	Superficial_Epithelial_0dpa
errfi1a#chr11:40831257-40832669	chr11:40831257-40832669	TSS	0	errfi1a	MA1144.1	chr11:40832326-40832335	-0.329698	1.53214	0.63661	fosl2	0.0824373	fosl2->errfi1a	20.752	0.138988	0	0	1.62846	1.24837	0	2.24061	Superficial_Epithelial_0dpa
errfi1a#chr11:40831257-40832669	chr11:40831257-40832669	TSS	0	errfi1a	MA0477.2	chr11:40832324-40832336	-0.342684	1.45855	0.622596	fosl1a	0.126437	fosl1a->errfi1a	20.1679	0.138492	0	0	2.74651	1.24837	0	2.24061	Superficial_Epithelial_0dpa
esrp1#chr16:26686782-26688045	chr16:26686782-26688045	Inter	0.08	esrp1	MA1515.1	chr16:26686957-26686967	-0.0692176	0.0950329	0.0704853	klf2b	0.107486	klf2b->esrp1	6.07345	0.0831945	0	0	1.42664	1.60055	0	2.78851	Superficial_Epithelial_0dpa
etfa#chr25:32754958-32756410	chr25:32754958-32756410	TSS	0	etfa	MA1527.1	chr25:32755633-32755649	-0.132467	0.109155	0.506266	nfic	0.072754	nfic->etfa	1.15947	0.0471818	0	0	0.510769	0.291313	0	1.40272	Superficial_Epithelial_0dpa
etnk1#chr4:16899086-16899311	chr4:16899086-16899311	TSS	0	etnk1	MA1515.1	chr4:16899115-16899125	-0.0702649	0.148164	0.058102	klf2b	0.107486	klf2b->etnk1	3.10434	0.0963994	0	0	1.42664	2.81732	0	3.26971	Superficial_Epithelial_0dpa
ets2#chr10:191557-191923	chr10:191557-191923	Body	0.052	ets2	MA0073.1	chr10:191820-191839	-0.0404882	0.0453355	0.0571256	rreb1a	0.0500665	rreb1a->ets2	1.31112	0.0384782	0	0	0.266798	0.987672	0	0.695756	Superficial_Epithelial_0dpa
ets2#chr10:191557-191923	chr10:191557-191923	Body	0.052	ets2	MA0073.1	chr10:191822-191841	-0.0441761	0.0457431	0.0640515	rreb1a	0.0500665	rreb1a->ets2	1.31112	0.0384782	0	0	0.266798	0.987672	0	0.695756	Superficial_Epithelial_0dpa
ets2#chr10:191557-191923	chr10:191557-191923	Body	0.052	ets2	MA0073.1	chr10:191856-191875	-0.0488445	0.0727236	0.0444209	rreb1a	0.0500665	rreb1a->ets2	1.31112	0.0384782	0	0	0.266798	0.987672	0	0.695756	Superficial_Epithelial_0dpa
ets2#chr10:191557-191923	chr10:191557-191923	Body	0.052	ets2	MA0073.1	chr10:191858-191877	-0.06103	0.0874288	0.05677	rreb1a	0.0500665	rreb1a->ets2	1.31112	0.0384782	0	0	0.266798	0.987672	0	0.695756	Superficial_Epithelial_0dpa
ets2#chr10:191557-191923	chr10:191557-191923	Body	0.052	ets2	MA0073.1	chr10:191860-191879	-0.109072	0.147954	0.109273	rreb1a	0.0500665	rreb1a->ets2	1.31112	0.0384782	0	0	0.266798	0.987672	0	0.695756	Superficial_Epithelial_0dpa
ets2#chr10:191557-191923	chr10:191557-191923	Body	0.052	ets2	MA0073.1	chr10:191862-191881	-0.121694	0.159593	0.123625	rreb1a	0.0500665	rreb1a->ets2	1.31112	0.0384782	0	0	0.266798	0.987672	0	0.695756	Superficial_Epithelial_0dpa
ets2#chr10:191557-191923	chr10:191557-191923	Body	0.052	ets2	MA0073.1	chr10:191864-191883	-0.110503	0.14349	0.110834	rreb1a	0.0500665	rreb1a->ets2	1.31112	0.0384782	0	0	0.266798	0.987672	0	0.695756	Superficial_Epithelial_0dpa
ets2#chr10:191557-191923	chr10:191557-191923	Body	0.052	ets2	MA0073.1	chr10:191866-191885	-0.120334	0.154055	0.123304	rreb1a	0.0500665	rreb1a->ets2	1.31112	0.0384782	0	0	0.266798	0.987672	0	0.695756	Superficial_Epithelial_0dpa
ets2#chr10:191557-191923	chr10:191557-191923	Body	0.052	ets2	MA0073.1	chr10:191868-191887	-0.117798	0.144601	0.123651	rreb1a	0.0500665	rreb1a->ets2	1.31112	0.0384782	0	0	0.266798	0.987672	0	0.695756	Superficial_Epithelial_0dpa
ets2#chr10:191557-191923	chr10:191557-191923	Body	0.052	ets2	MA0073.1	chr10:191870-191889	-0.103672	0.115925	0.111836	rreb1a	0.0500665	rreb1a->ets2	1.31112	0.0384782	0	0	0.266798	0.987672	0	0.695756	Superficial_Epithelial_0dpa
ets2#chr10:191557-191923	chr10:191557-191923	Body	0.052	ets2	MA0073.1	chr10:191872-191891	-0.0964527	0.104817	0.105751	rreb1a	0.0500665	rreb1a->ets2	1.31112	0.0384782	0	0	0.266798	0.987672	0	0.695756	Superficial_Epithelial_0dpa
ets2#chr10:191557-191923	chr10:191557-191923	Body	0.052	ets2	MA0073.1	chr10:191874-191893	-0.0680979	0.0718317	0.0715863	rreb1a	0.0500665	rreb1a->ets2	1.31112	0.0384782	0	0	0.266798	0.987672	0	0.695756	Superficial_Epithelial_0dpa
ets2#chr10:187474-188851	chr10:187474-188851	TSS	0	ets2	MA0073.1	chr10:187811-187830	-0.379072	1.07468	0.139923	rreb1a	0.0500665	rreb1a->ets2	1.31112	0.0384782	0	0	0.266798	0.987672	0	1.98188	Superficial_Epithelial_0dpa
ets2#chr10:187474-188851	chr10:187474-188851	TSS	0	ets2	MA0073.1	chr10:187833-187852	-0.554854	0.932778	0.548454	rreb1a	0.0500665	rreb1a->ets2	1.31112	0.0384782	0	0	0.266798	0.987672	0	1.98188	Superficial_Epithelial_0dpa
ets2#chr10:187474-188851	chr10:187474-188851	TSS	0	ets2	MA0073.1	chr10:188021-188040	-0.0873506	0.464014	0.0212393	rreb1a	0.0500665	rreb1a->ets2	1.31112	0.0384782	0	0	0.266798	0.987672	0	1.98188	Superficial_Epithelial_0dpa
ets2#chr10:187474-188851	chr10:187474-188851	TSS	0	ets2	MA0073.1	chr10:188023-188042	-0.611068	1.11208	0.594978	rreb1a	0.0500665	rreb1a->ets2	1.31112	0.0384782	0	0	0.266798	0.987672	0	1.98188	Superficial_Epithelial_0dpa
ets2#chr10:187474-188851	chr10:187474-188851	TSS	0	ets2	MA0073.1	chr10:188025-188044	-0.754604	1.28309	0.770879	rreb1a	0.0500665	rreb1a->ets2	1.31112	0.0384782	0	0	0.266798	0.987672	0	1.98188	Superficial_Epithelial_0dpa
ets2#chr10:187474-188851	chr10:187474-188851	TSS	0	ets2	MA0073.1	chr10:188027-188046	-0.881854	1.40962	0.945929	rreb1a	0.0500665	rreb1a->ets2	1.31112	0.0384782	0	0	0.266798	0.987672	0	1.98188	Superficial_Epithelial_0dpa
ets2#chr10:187474-188851	chr10:187474-188851	TSS	0	ets2	MA0073.1	chr10:188029-188048	-1.0148	1.54954	1.1289	rreb1a	0.0500665	rreb1a->ets2	1.31112	0.0384782	0	0	0.266798	0.987672	0	1.98188	Superficial_Epithelial_0dpa
ets2#chr10:187474-188851	chr10:187474-188851	TSS	0	ets2	MA0073.1	chr10:188031-188050	-1.05693	1.57232	1.20418	rreb1a	0.0500665	rreb1a->ets2	1.31112	0.0384782	0	0	0.266798	0.987672	0	1.98188	Superficial_Epithelial_0dpa
ets2#chr10:187474-188851	chr10:187474-188851	TSS	0	ets2	MA0073.1	chr10:188033-188052	-1.13571	1.64325	1.33235	rreb1a	0.0500665	rreb1a->ets2	1.31112	0.0384782	0	0	0.266798	0.987672	0	1.98188	Superficial_Epithelial_0dpa
ets2#chr10:187474-188851	chr10:187474-188851	TSS	0	ets2	MA0073.1	chr10:188035-188054	-1.18052	1.66227	1.41236	rreb1a	0.0500665	rreb1a->ets2	1.31112	0.0384782	0	0	0.266798	0.987672	0	1.98188	Superficial_Epithelial_0dpa
ets2#chr10:187474-188851	chr10:187474-188851	TSS	0	ets2	MA0073.1	chr10:188037-188056	-1.15459	1.61481	1.41715	rreb1a	0.0500665	rreb1a->ets2	1.31112	0.0384782	0	0	0.266798	0.987672	0	1.98188	Superficial_Epithelial_0dpa
ets2#chr10:187474-188851	chr10:187474-188851	TSS	0	ets2	MA0073.1	chr10:188039-188058	-1.15557	1.53296	1.44765	rreb1a	0.0500665	rreb1a->ets2	1.31112	0.0384782	0	0	0.266798	0.987672	0	1.98188	Superficial_Epithelial_0dpa
ets2#chr10:187474-188851	chr10:187474-188851	TSS	0	ets2	MA0073.1	chr10:188041-188060	-1.12571	1.47126	1.43864	rreb1a	0.0500665	rreb1a->ets2	1.31112	0.0384782	0	0	0.266798	0.987672	0	1.98188	Superficial_Epithelial_0dpa
ets2#chr10:187474-188851	chr10:187474-188851	TSS	0	ets2	MA0073.1	chr10:188043-188062	-1.0584	1.38475	1.41102	rreb1a	0.0500665	rreb1a->ets2	1.31112	0.0384782	0	0	0.266798	0.987672	0	1.98188	Superficial_Epithelial_0dpa
ets2#chr10:187474-188851	chr10:187474-188851	TSS	0	ets2	MA0073.1	chr10:188045-188064	-1.00951	1.25447	1.38275	rreb1a	0.0500665	rreb1a->ets2	1.31112	0.0384782	0	0	0.266798	0.987672	0	1.98188	Superficial_Epithelial_0dpa
ets2#chr10:187474-188851	chr10:187474-188851	TSS	0	ets2	MA0073.1	chr10:188047-188066	-0.781747	1.00969	1.11641	rreb1a	0.0500665	rreb1a->ets2	1.31112	0.0384782	0	0	0.266798	0.987672	0	1.98188	Superficial_Epithelial_0dpa
ets2#chr10:187474-188851	chr10:187474-188851	TSS	0	ets2	MA0073.1	chr10:188049-188068	-0.656125	0.87326	0.976542	rreb1a	0.0500665	rreb1a->ets2	1.31112	0.0384782	0	0	0.266798	0.987672	0	1.98188	Superficial_Epithelial_0dpa
ets2#chr10:187474-188851	chr10:187474-188851	TSS	0	ets2	MA0073.1	chr10:188075-188094	-0.11582	0.0258968	0.112086	rreb1a	0.0500665	rreb1a->ets2	1.31112	0.0384782	0	0	0.266798	0.987672	0	1.98188	Superficial_Epithelial_0dpa
ets2#chr10:187474-188851	chr10:187474-188851	TSS	0	ets2	MA0073.1	chr10:188077-188096	-0.276319	0.224985	0.280115	rreb1a	0.0500665	rreb1a->ets2	1.31112	0.0384782	0	0	0.266798	0.987672	0	1.98188	Superficial_Epithelial_0dpa
ets2#chr10:187474-188851	chr10:187474-188851	TSS	0	ets2	MA0073.1	chr10:188079-188098	-0.212867	0.165767	0.213332	rreb1a	0.0500665	rreb1a->ets2	1.31112	0.0384782	0	0	0.266798	0.987672	0	1.98188	Superficial_Epithelial_0dpa
ets2#chr10:187474-188851	chr10:187474-188851	TSS	0	ets2	MA1126.1	chr10:188614-188629	0.922865	2.99462	0.457572	fosab	0.10646	fosab->ets2	31.1564	0.164574	0	0	2.65236	0.987672	0	1.98188	Superficial_Epithelial_0dpa
ets2#chr10:187474-188851	chr10:187474-188851	TSS	0	ets2	MA1951.1	chr10:188613-188626	1.44139	1.97693	-0.427077	fosab	0.154414	fosab->ets2	31.1564	0.164574	0	0	2.65236	0.987672	0	1.98188	Superficial_Epithelial_0dpa
ets2#chr10:187474-188851	chr10:187474-188851	TSS	0	ets2	MA1951.1	chr10:188613-188626	1.44139	1.97693	-0.427077	fosab	0.154414	fosab->ets2	31.1564	0.164574	0	0	2.65236	0.987672	0	1.98188	Superficial_Epithelial_0dpa
evi5b#chr6:29083732-29085798	chr6:29083732-29085798	TSS	0	evi5b	MA0480.2	chr6:29084778-29084788	0.241073	0.376362	-0.150151	foxo1a	0.0795932	foxo1a->evi5b	1.38017	0.0791944	0	0	2.13262	2.25628	0	1.75912	Superficial_Epithelial_0dpa
evi5b#chr6:29083732-29085798	chr6:29083732-29085798	TSS	0	evi5b	MA0480.2	chr6:29084035-29084045	-0.0551681	0.0640127	0.0498448	foxo1a	0.0795932	foxo1a->evi5b	1.38017	0.0791944	0	0	2.13262	2.25628	0	1.75912	Superficial_Epithelial_0dpa
exoc5#chr17:44440181-44441737	chr17:44440181-44441737	TSS	0	exoc5	MA0685.2	chr17:44441000-44441008	-0.381635	0.55561	-0.382987	sp4	0.0623666	sp4->exoc5	1.50654	0.04303	0	0	0.100349	0.0195037	0	1.39825	Superficial_Epithelial_0dpa
exoc6b#chr7:25135113-25136873	chr7:25135113-25136873	TSS	0	exoc6b	MA1101.2	chr7:25136289-25136307	0.221145	0.0585879	0.0767667	bach2b	0.0657534	bach2b->exoc6b	1.24644	0.0515801	0	0	0.209666	0.779437	0	1.65493	Superficial_Epithelial_0dpa
exoc6b#chr7:25135113-25136873	chr7:25135113-25136873	TSS	0	exoc6b	MA1101.2	chr7:25136289-25136307	0.221145	0.0585879	0.0767667	bach2b	0.0657534	bach2b->exoc6b	1.24644	0.0515801	0	0	0.209666	0.779437	0	1.65493	Superficial_Epithelial_0dpa
exoc6b#chr7:25135113-25136873	chr7:25135113-25136873	TSS	0	exoc6b	MA1644.1	chr7:25136307-25136317	-0.2037	0.208638	0.627035	nfyc	0.0550306	nfyc->exoc6b	1.31671	0.0461308	0	0	0.256556	0.779437	0	1.65493	Superficial_Epithelial_0dpa
exosc2#chr5:72136155-72136755	chr5:72136155-72136755	TSS	0	exosc2	MA0522.3	chr5:72136435-72136445	-0.216518	0.276281	0.127765	tcf3a	0.0820155	tcf3a->exosc2	2.18289	0.0402558	0	0	0.450357	0.033646	0	1.39103	Superficial_Epithelial_0dpa
ezra#chr17:45412904-45414048	chr17:45412904-45414048	Body	0.25	ezra	MA1515.1	chr17:45413282-45413292	0.229936	-0.128922	0.538177	klf2b	0.107486	klf2b->ezra	1.28203	0.0482967	0	0	1.42664	0.958297	0	1.06679	Superficial_Epithelial_0dpa
ezra#chr17:45427510-45428488	chr17:45427510-45428488	Body	0.228	ezra	MA0525.2	chr17:45427902-45427919	0.0714207	0.123174	-0.0116762	tp63	0.180472	tp63->ezra	2.94915	0.103787	0	0	0.439364	0.958297	0	1.23925	Superficial_Epithelial_0dpa
ezra#chr17:45427510-45428488	chr17:45427510-45428488	Body	0.228	ezra	MA0525.2	chr17:45427902-45427919	0.0714207	0.123174	-0.0116762	tp63	0.180472	tp63->ezra	2.94915	0.103787	0	0	0.439364	0.958297	0	1.23925	Superficial_Epithelial_0dpa
ezra#chr17:45427510-45428488	chr17:45427510-45428488	Body	0.228	ezra	MA1120.1	chr17:45428247-45428257	-0.0664467	0.0187578	0.0907571	sox13	0.0537339	sox13->ezra	1.29728	0.0737732	0	0	0.248264	0.958297	0	1.23925	Superficial_Epithelial_0dpa
ezra#chr17:45427510-45428488	chr17:45427510-45428488	Body	0.228	ezra	MA1101.2	chr17:45427887-45427905	-0.158892	0.426008	0.245856	bach2b	0.0657534	bach2b->ezra	9.81961	0.135364	0	0	0.209666	0.958297	0	1.23925	Superficial_Epithelial_0dpa
ezra#chr17:45427510-45428488	chr17:45427510-45428488	Body	0.228	ezra	MA1101.2	chr17:45427887-45427905	-0.158892	0.426008	0.245856	bach2b	0.0657534	bach2b->ezra	9.81961	0.135364	0	0	0.209666	0.958297	0	1.23925	Superficial_Epithelial_0dpa
ezra#chr17:45412904-45414048	chr17:45412904-45414048	TSS	0.25	ezra	MA1515.1	chr17:45413282-45413292	0.229936	-0.128922	0.538177	klf2b	0.107486	klf2b->ezra	1.28203	0.0482967	0	0	1.42664	0.958297	0	1.06679	Superficial_Epithelial_0dpa
f11r.1#chr5:29830485-29832485	chr5:29830485-29832485	Body	0.092	f11r.1	MA0656.1	chr5:29831166-29831177	0.0209238	-0.260489	2.30932	jdp2b	0.138912	jdp2b->f11r.1	1.90935	0.0736142	0	0	1.27829	2.15467	0	2.14805	Superficial_Epithelial_0dpa
f11r.1#chr5:29830485-29832485	chr5:29830485-29832485	Body	0.092	f11r.1	MA0656.1	chr5:29831166-29831177	0.0209238	-0.260489	2.30932	jdp2b	0.138912	jdp2b->f11r.1	1.90935	0.0736142	0	0	1.27829	2.15467	0	2.14805	Superficial_Epithelial_0dpa
f11r.1#chr5:29830485-29832485	chr5:29830485-29832485	Body	0.092	f11r.1	MA1126.1	chr5:29831162-29831177	-0.161333	0.0520041	1.70594	fosab	0.10646	fosab->f11r.1	3.77231	0.0638128	0	0	2.65236	2.15467	0	2.14805	Superficial_Epithelial_0dpa
f11r.1#chr5:29830485-29832485	chr5:29830485-29832485	Body	0.092	f11r.1	MA0609.2	chr5:29831164-29831179	-0.239769	0.122408	1.81052	crema	0.0998319	crema->f11r.1	1.58024	0.0679765	0	0	1.34056	2.15467	0	2.14805	Superficial_Epithelial_0dpa
f11r.1#chr5:29830485-29832485	chr5:29830485-29832485	Body	0.092	f11r.1	MA0609.2	chr5:29831164-29831179	-0.239769	0.122408	1.81052	crema	0.0998319	crema->f11r.1	1.58024	0.0679765	0	0	1.34056	2.15467	0	2.14805	Superficial_Epithelial_0dpa
f11r.1#chr5:29830485-29832485	chr5:29830485-29832485	Body	0.092	f11r.1	MA1951.1	chr5:29831165-29831178	-0.203328	0.0743043	1.85143	fosab	0.154414	fosab->f11r.1	3.77231	0.0638128	0	0	2.65236	2.15467	0	2.14805	Superficial_Epithelial_0dpa
f11r.1#chr5:29830485-29832485	chr5:29830485-29832485	Body	0.092	f11r.1	MA1951.1	chr5:29831165-29831178	-0.203328	0.0743043	1.85143	fosab	0.154414	fosab->f11r.1	3.77231	0.0638128	0	0	2.65236	2.15467	0	2.14805	Superficial_Epithelial_0dpa
f11r.1#chr5:29830485-29832485	chr5:29830485-29832485	TSS	0.092	f11r.1	MA0656.1	chr5:29831166-29831177	0.0209238	-0.260489	2.30932	jdp2b	0.138912	jdp2b->f11r.1	1.90935	0.0736142	0	0	1.27829	2.15467	0	2.14805	Superficial_Epithelial_0dpa
f11r.1#chr5:29830485-29832485	chr5:29830485-29832485	TSS	0.092	f11r.1	MA0656.1	chr5:29831166-29831177	0.0209238	-0.260489	2.30932	jdp2b	0.138912	jdp2b->f11r.1	1.90935	0.0736142	0	0	1.27829	2.15467	0	2.14805	Superficial_Epithelial_0dpa
f11r.1#chr5:29830485-29832485	chr5:29830485-29832485	TSS	0.092	f11r.1	MA1126.1	chr5:29831162-29831177	-0.161333	0.0520041	1.70594	fosab	0.10646	fosab->f11r.1	3.77231	0.0638128	0	0	2.65236	2.15467	0	2.14805	Superficial_Epithelial_0dpa
f11r.1#chr5:29830485-29832485	chr5:29830485-29832485	TSS	0.092	f11r.1	MA0609.2	chr5:29831164-29831179	-0.239769	0.122408	1.81052	crema	0.0998319	crema->f11r.1	1.58024	0.0679765	0	0	1.34056	2.15467	0	2.14805	Superficial_Epithelial_0dpa
f11r.1#chr5:29830485-29832485	chr5:29830485-29832485	TSS	0.092	f11r.1	MA0609.2	chr5:29831164-29831179	-0.239769	0.122408	1.81052	crema	0.0998319	crema->f11r.1	1.58024	0.0679765	0	0	1.34056	2.15467	0	2.14805	Superficial_Epithelial_0dpa
f11r.1#chr5:29830485-29832485	chr5:29830485-29832485	TSS	0.092	f11r.1	MA1951.1	chr5:29831165-29831178	-0.203328	0.0743043	1.85143	fosab	0.154414	fosab->f11r.1	3.77231	0.0638128	0	0	2.65236	2.15467	0	2.14805	Superficial_Epithelial_0dpa
f11r.1#chr5:29830485-29832485	chr5:29830485-29832485	TSS	0.092	f11r.1	MA1951.1	chr5:29831165-29831178	-0.203328	0.0743043	1.85143	fosab	0.154414	fosab->f11r.1	3.77231	0.0638128	0	0	2.65236	2.15467	0	2.14805	Superficial_Epithelial_0dpa
f2rl1.2#chr21:7927612-7928583	chr21:7927612-7928583	TSS	0	f2rl1.2	MA1126.1	chr21:7928181-7928196	0.761659	-0.273586	1.02192	fosab	0.10646	fosab->f2rl1.2	10.753	0.118948	0	0	2.65236	1.23059	0	2.43401	Superficial_Epithelial_0dpa
f2rl1.2#chr21:7927612-7928583	chr21:7927612-7928583	TSS	0	f2rl1.2	MA1127.1	chr21:7928185-7928195	1.37246	-0.451228	1.07409	fosb	0.150449	fosb->f2rl1.2	6.81974	0.0937357	0	0	2.01852	1.23059	0	2.43401	Superficial_Epithelial_0dpa
f2rl1.2#chr21:7927612-7928583	chr21:7927612-7928583	TSS	0	f2rl1.2	MA1127.1	chr21:7928186-7928196	1.39468	-0.490949	1.14761	fosb	0.150449	fosb->f2rl1.2	6.81974	0.0937357	0	0	2.01852	1.23059	0	2.43401	Superficial_Epithelial_0dpa
f2rl1.2#chr21:7927612-7928583	chr21:7927612-7928583	TSS	0	f2rl1.2	MA1129.1	chr21:7928186-7928195	1.56748	-0.655441	1.07888	jun	0.0526979	jun->f2rl1.2	3.14766	0.0823756	0	0	2.12638	1.23059	0	2.43401	Superficial_Epithelial_0dpa
f2rl1.2#chr21:7927612-7928583	chr21:7927612-7928583	TSS	0	f2rl1.2	MA1129.1	chr21:7928186-7928195	1.56748	-0.655441	1.07888	jun	0.0526979	jun->f2rl1.2	3.14766	0.0823756	0	0	2.12638	1.23059	0	2.43401	Superficial_Epithelial_0dpa
f2rl1.2#chr21:7927612-7928583	chr21:7927612-7928583	TSS	0	f2rl1.2	MA1133.1	chr21:7928185-7928196	1.23031	-0.358728	1.04466	jun	0.05518	jun->f2rl1.2	3.14766	0.0823756	0	0	2.12638	1.23059	0	2.43401	Superficial_Epithelial_0dpa
f2rl1.2#chr21:7927612-7928583	chr21:7927612-7928583	TSS	0	f2rl1.2	MA1133.1	chr21:7928185-7928196	1.23031	-0.358728	1.04466	junbb	0.090798	junbb->f2rl1.2	2.89804	0.0818685	0	0	1.09612	1.23059	0	2.43401	Superficial_Epithelial_0dpa
f2rl1.2#chr21:7927612-7928583	chr21:7927612-7928583	TSS	0	f2rl1.2	MA1133.1	chr21:7928185-7928196	1.23031	-0.358728	1.04466	jun	0.05518	jun->f2rl1.2	3.14766	0.0823756	0	0	2.12638	1.23059	0	2.43401	Superficial_Epithelial_0dpa
f2rl1.2#chr21:7927612-7928583	chr21:7927612-7928583	TSS	0	f2rl1.2	MA1133.1	chr21:7928185-7928196	1.23031	-0.358728	1.04466	junbb	0.090798	junbb->f2rl1.2	2.89804	0.0818685	0	0	1.09612	1.23059	0	2.43401	Superficial_Epithelial_0dpa
f2rl1.2#chr21:7927612-7928583	chr21:7927612-7928583	TSS	0	f2rl1.2	MA1136.1	chr21:7928186-7928195	1.56748	-0.655441	1.07888	fosb	0.133295	fosb->f2rl1.2	6.81974	0.0937357	0	0	2.01852	1.23059	0	2.43401	Superficial_Epithelial_0dpa
f2rl1.2#chr21:7927612-7928583	chr21:7927612-7928583	TSS	0	f2rl1.2	MA1136.1	chr21:7928186-7928195	1.56748	-0.655441	1.07888	junbb	0.0827228	junbb->f2rl1.2	2.89804	0.0818685	0	0	1.09612	1.23059	0	2.43401	Superficial_Epithelial_0dpa
f2rl1.2#chr21:7927612-7928583	chr21:7927612-7928583	TSS	0	f2rl1.2	MA1136.1	chr21:7928186-7928195	1.56748	-0.655441	1.07888	fosb	0.133295	fosb->f2rl1.2	6.81974	0.0937357	0	0	2.01852	1.23059	0	2.43401	Superficial_Epithelial_0dpa
f2rl1.2#chr21:7927612-7928583	chr21:7927612-7928583	TSS	0	f2rl1.2	MA1136.1	chr21:7928186-7928195	1.56748	-0.655441	1.07888	junbb	0.0827228	junbb->f2rl1.2	2.89804	0.0818685	0	0	1.09612	1.23059	0	2.43401	Superficial_Epithelial_0dpa
f2rl1.2#chr21:7927612-7928583	chr21:7927612-7928583	TSS	0	f2rl1.2	MA1139.1	chr21:7928185-7928196	1.23031	-0.358728	1.04466	junbb	0.0817679	junbb->f2rl1.2	2.89804	0.0818685	0	0	1.09612	1.23059	0	2.43401	Superficial_Epithelial_0dpa
f2rl1.2#chr21:7927612-7928583	chr21:7927612-7928583	TSS	0	f2rl1.2	MA1139.1	chr21:7928185-7928196	1.23031	-0.358728	1.04466	junbb	0.0817679	junbb->f2rl1.2	2.89804	0.0818685	0	0	1.09612	1.23059	0	2.43401	Superficial_Epithelial_0dpa
f2rl1.2#chr21:7927612-7928583	chr21:7927612-7928583	TSS	0	f2rl1.2	MA1509.1	chr21:7928239-7928247	-0.264431	2.78486	1.36876	irf6	0.0899394	irf6->f2rl1.2	5.79534	0.0789185	0	0	0.476886	1.23059	0	2.43401	Superficial_Epithelial_0dpa
f2rl1.2#chr21:7927612-7928583	chr21:7927612-7928583	TSS	0	f2rl1.2	MA1140.2	chr21:7928185-7928196	1.23031	-0.358728	1.04466	junbb	0.0902616	junbb->f2rl1.2	2.89804	0.0818685	0	0	1.09612	1.23059	0	2.43401	Superficial_Epithelial_0dpa
f2rl1.2#chr21:7927612-7928583	chr21:7927612-7928583	TSS	0	f2rl1.2	MA1140.2	chr21:7928185-7928196	1.23031	-0.358728	1.04466	junbb	0.0902616	junbb->f2rl1.2	2.89804	0.0818685	0	0	1.09612	1.23059	0	2.43401	Superficial_Epithelial_0dpa
f3a#chr24:31263897-31265507	chr24:31263897-31265507	Inter	0.084	f3a	MA1126.1	chr24:31265113-31265128	0.0263384	0.0360147	0.0781413	fosab	0.10646	fosab->f3a	2.95036	0.087661	0	0	2.65236	0.177762	0	2.49637	Superficial_Epithelial_0dpa
f3a#chr24:31302668-31304192	chr24:31302668-31304192	Inter	0.066	f3a	MA0840.1	chr24:31302822-31302833	-0.0453245	-0.0669646	0.223284	creb5b	0.128114	creb5b->f3a	8.22491	0.135291	0	0	0.361049	0.177762	0	1.40126	Superficial_Epithelial_0dpa
f3a#chr24:31302668-31304192	chr24:31302668-31304192	Inter	0.066	f3a	MA0840.1	chr24:31302822-31302833	-0.0453245	-0.0669646	0.223284	creb5b	0.128114	creb5b->f3a	8.22491	0.135291	0	0	0.361049	0.177762	0	1.40126	Superficial_Epithelial_0dpa
f3a#chr24:31302668-31304192	chr24:31302668-31304192	Inter	0.066	f3a	MA1126.1	chr24:31302822-31302837	-0.092009	0.00433544	0.334425	fosab	0.10646	fosab->f3a	2.95036	0.087661	0	0	2.65236	0.177762	0	1.40126	Superficial_Epithelial_0dpa
f3a#chr24:31302668-31304192	chr24:31302668-31304192	Inter	0.066	f3a	MA1136.1	chr24:31302823-31302832	-0.107757	-0.0229149	0.31236	junba	0.0510403	junba->f3a	1.29128	0.0443292	0	0	1.93563	0.177762	0	1.40126	Superficial_Epithelial_0dpa
f3a#chr24:31302668-31304192	chr24:31302668-31304192	Inter	0.066	f3a	MA1136.1	chr24:31302823-31302832	-0.107757	-0.0229149	0.31236	junba	0.0510403	junba->f3a	1.29128	0.0443292	0	0	1.93563	0.177762	0	1.40126	Superficial_Epithelial_0dpa
f3a#chr24:31302668-31304192	chr24:31302668-31304192	Inter	0.066	f3a	MA1951.1	chr24:31302821-31302834	-0.0368857	-0.0634118	0.275986	fosab	0.154414	fosab->f3a	2.95036	0.087661	0	0	2.65236	0.177762	0	1.40126	Superficial_Epithelial_0dpa
f3a#chr24:31302668-31304192	chr24:31302668-31304192	Inter	0.066	f3a	MA1951.1	chr24:31302821-31302834	-0.0368857	-0.0634118	0.275986	fosab	0.154414	fosab->f3a	2.95036	0.087661	0	0	2.65236	0.177762	0	1.40126	Superficial_Epithelial_0dpa
fa2h#chr25:13595404-13596511	chr25:13595404-13596511	Body	0.051	fa2h	MA1509.1	chr25:13595914-13595922	0.0113561	0.515069	-0.293068	irf6	0.0899394	irf6->fa2h	6.28761	0.069309	0	0	0.476886	1.76421	0	2.82253	Superficial_Epithelial_0dpa
fa2h#chr25:13614172-13615085	chr25:13614172-13615085	TSS	0	fa2h	MA1509.1	chr25:13614950-13614958	-0.417444	0.29911	0.892756	irf6	0.0899394	irf6->fa2h	6.28761	0.069309	0	0	0.476886	1.76421	0	2.52543	Superficial_Epithelial_0dpa
fa2h#chr25:13614172-13615085	chr25:13614172-13615085	TSS	0	fa2h	MA0640.2	chr25:13614272-13614285	-0.114569	0.126857	0.383792	elf3	0.0502292	elf3->fa2h	3.54552	0.055712	0	0	1.46398	1.76421	0	2.52543	Superficial_Epithelial_0dpa
fabp3#chr19:42983171-42984838	chr19:42983171-42984838	Body	0.076	fabp3	MA0656.1	chr19:42983587-42983598	0.279745	1.44212	-0.371127	jdp2b	0.138912	jdp2b->fabp3	1.65893	0.0346241	0	0	1.27829	0.246931	0	1.32985	Superficial_Epithelial_0dpa
fabp3#chr19:42983171-42984838	chr19:42983171-42984838	Body	0.076	fabp3	MA0147.3	chr19:42983751-42983762	-0.138771	0.100178	0.310093	myca	0.0687634	myca->fabp3	3.26303	0.0642994	0	0	0.0350607	0.246931	0	1.32985	Superficial_Epithelial_0dpa
fabp3#chr19:42983171-42984838	chr19:42983171-42984838	Body	0.076	fabp3	MA1127.1	chr19:42983587-42983597	0.305177	1.48817	-0.374321	fosb	0.150449	fosb->fabp3	1.79495	0.0396566	0	0	2.01852	0.246931	0	1.32985	Superficial_Epithelial_0dpa
fabp3#chr19:42983171-42984838	chr19:42983171-42984838	Body	0.076	fabp3	MA1136.1	chr19:42983588-42983597	0.196702	2.00892	-0.369905	fosb	0.133295	fosb->fabp3	1.79495	0.0396566	0	0	2.01852	0.246931	0	1.32985	Superficial_Epithelial_0dpa
fabp3#chr19:42983171-42984838	chr19:42983171-42984838	TSS	0.076	fabp3	MA0656.1	chr19:42983587-42983598	0.279745	1.44212	-0.371127	jdp2b	0.138912	jdp2b->fabp3	1.65893	0.0346241	0	0	1.27829	0.246931	0	1.32985	Superficial_Epithelial_0dpa
fabp3#chr19:42983171-42984838	chr19:42983171-42984838	TSS	0.076	fabp3	MA0147.3	chr19:42983751-42983762	-0.138771	0.100178	0.310093	myca	0.0687634	myca->fabp3	3.26303	0.0642994	0	0	0.0350607	0.246931	0	1.32985	Superficial_Epithelial_0dpa
fabp3#chr19:42983171-42984838	chr19:42983171-42984838	TSS	0.076	fabp3	MA1127.1	chr19:42983587-42983597	0.305177	1.48817	-0.374321	fosb	0.150449	fosb->fabp3	1.79495	0.0396566	0	0	2.01852	0.246931	0	1.32985	Superficial_Epithelial_0dpa
fabp3#chr19:42983171-42984838	chr19:42983171-42984838	TSS	0.076	fabp3	MA1136.1	chr19:42983588-42983597	0.196702	2.00892	-0.369905	fosb	0.133295	fosb->fabp3	1.79495	0.0396566	0	0	2.01852	0.246931	0	1.32985	Superficial_Epithelial_0dpa
fam107b#chr18:12282145-12283607	chr18:12282145-12283607	Body	0.238	fam107b	MA0525.2	chr18:12283010-12283027	-0.128704	0.123325	0.20735	tp63	0.180472	tp63->fam107b	13.0026	0.202125	0	0	0.439364	0.0962618	0	0.179946	Superficial_Epithelial_0dpa
fam107b#chr18:12282145-12283607	chr18:12282145-12283607	Body	0.238	fam107b	MA0525.2	chr18:12283010-12283027	-0.128704	0.123325	0.20735	tp63	0.180472	tp63->fam107b	13.0026	0.202125	0	0	0.439364	0.0962618	0	0.179946	Superficial_Epithelial_0dpa
fam107b#chr18:12327064-12328294	chr18:12327064-12328294	Body	0.135	fam107b	MA0059.1	chr18:12328206-12328216	-0.0804416	0.0183967	0.177656	myca	0.0678733	myca->fam107b	9.90805	0.135576	0	0	0.0350607	0.0962618	0	0.768022	Superficial_Epithelial_0dpa
fam107b#chr18:12327064-12328294	chr18:12327064-12328294	Body	0.135	fam107b	MA0147.3	chr18:12328205-12328216	-0.0878388	0.034467	0.178292	myca	0.0687634	myca->fam107b	9.90805	0.135576	0	0	0.0350607	0.0962618	0	0.768022	Superficial_Epithelial_0dpa
fam107b#chr18:12327064-12328294	chr18:12327064-12328294	TSS	0.135	fam107b	MA0059.1	chr18:12328206-12328216	-0.0804416	0.0183967	0.177656	myca	0.0678733	myca->fam107b	9.90805	0.135576	0	0	0.0350607	0.0962618	0	0.768022	Superficial_Epithelial_0dpa
[truncated: 43,684 more rows]

## Sheet: Table S5B
Table S5. TF-target inferences across cell types and stages
B. TF-target inference in IE across stages
[truncated: 33,968 more rows]

## Sheet: Table S5C
Table S5. TF-target inferences across cell types and stages
C. TF-target inference in BE across stages
[truncated: 56,485 more rows]

## Sheet: Table S5D
Table S5. TF-target inferences across cell types and stages
[truncated: 64,390 more rows]

[truncated: 2 more sheets: Table S5E, Table S5F]
