# Supplementary material for: Common and specific gene regulatory programs in zebrafish caudal fin regeneration at single-cell resolution
Source: HighWire-hosted journal article supplement (doi:10.1101/gr.279372.124), 2025-01-01
Supplement: Supplemental_Table_S6.xlsx [file Supplemental_Table_S6.xlsx]

## Sheet: Table S6A
Table S6. Mesenchymal (MES) subclusters DEGs and CellOracle infered GRNs
A. MES subclusters differentially expressed genes
p_val	avg_log2FC	pct.1	pct.2	p_val_adj	cluster	gene
4.3981e-269	2.61348	0.791	0.08	1.07226e-264	MES_0	mamdc2b
6.42935e-187	3.00651	0.418	0.024	1.56747e-182	MES_0	c4b
6.13304e-178	1.72918	0.535	0.05	1.49523e-173	MES_0	olfml2ba
2.77527e-161	1.71862	0.388	0.025	6.76611e-157	MES_0	asic1b
2.49587e-153	3.51018	0.802	0.182	6.08494e-149	MES_0	si:ch211-106h4.12
2.0794e-144	2.26462	0.744	0.154	5.06957e-140	MES_0	pah
1.10697e-143	2.03293	0.546	0.074	2.6988e-139	MES_0	GRIK3
2.45792e-131	2.88701	0.414	0.041	5.9924e-127	MES_0	CABZ01029822.1
4.33881e-129	1.16487	0.264	0.012	1.0578e-124	MES_0	vmo1a
3.19967e-126	2.84688	0.974	0.51	7.8008e-122	MES_0	abi3bpb
1.12915e-122	1.71958	0.85	0.239	2.75287e-118	MES_0	mfap5
2.05546e-103	1.77164	0.733	0.199	5.01122e-99	MES_0	ntn1a
1.69341e-95	1.92852	0.429	0.07	4.12853e-91	MES_0	adamtsl3
1.53984e-93	1.26999	0.264	0.021	3.75412e-89	MES_0	si:dkey-164f24.2
5.73324e-93	1.49466	0.52	0.102	1.39776e-88	MES_0	sfrp2
1.16994e-91	1.76032	0.795	0.289	2.8523e-87	MES_0	fgl1
7.45571e-89	1.75378	0.37	0.053	1.8177e-84	MES_0	lrp1ba
1.34354e-85	1.59651	0.355	0.049	3.27554e-81	MES_0	ucmaa
1.66339e-84	1.33903	0.399	0.065	4.05535e-80	MES_0	crabp1b
1.00534e-82	1.28228	0.553	0.131	2.45102e-78	MES_0	si:ch211-243a20.3
2.21053e-82	1.47827	0.81	0.322	5.38928e-78	MES_0	si:ch1073-459j12.1
5.84328e-81	1.83118	0.524	0.129	1.42459e-76	MES_0	fbn2a
7.47078e-81	1.53721	0.396	0.069	1.82138e-76	MES_0	ltk
1.07849e-79	2.58675	0.733	0.299	2.62935e-75	MES_0	cxcl18b
4.38264e-79	1.75797	0.905	0.597	1.06849e-74	MES_0	tenm3
6.045e-79	1.71845	0.637	0.189	1.47377e-74	MES_0	znf536
1.3817e-78	1.86746	0.978	0.723	3.36857e-74	MES_0	serpine1
3.30405e-76	1.33391	0.623	0.177	8.05529e-72	MES_0	adamts2
2.66596e-75	1.64153	0.451	0.097	6.49961e-71	MES_0	notum1b
1.71896e-74	1.74239	0.542	0.142	4.19082e-70	MES_0	enox1
2.07614e-73	2.18506	0.941	0.64	5.06162e-69	MES_0	f3b
3.91961e-72	1.49316	0.447	0.096	9.55601e-68	MES_0	tat
6.20474e-71	0.80668	0.209	0.018	1.51271e-66	MES_0	podn
5.61809e-68	1.29799	0.454	0.105	1.36969e-63	MES_0	CABZ01085139.1
1.81891e-66	1.69356	0.725	0.306	4.4345e-62	MES_0	zbtb16a
5.47731e-66	1.3709	0.348	0.065	1.33537e-61	MES_0	si:ch211-159i8.4
6.34096e-66	1.47931	0.645	0.209	1.54593e-61	MES_0	postna
2.41313e-65	2.15843	0.769	0.399	5.8832e-61	MES_0	tgfbr3
2.9497e-65	1.50355	0.546	0.158	7.19138e-61	MES_0	angptl1a
5.27565e-65	1.56759	0.762	0.391	1.2862e-60	MES_0	lrrc15
4.27548e-63	2.0833	0.696	0.332	1.04236e-58	MES_0	entpd1
1.17072e-60	1.28338	0.396	0.089	2.85421e-56	MES_0	rem1
5.09689e-60	1.94632	0.645	0.272	1.24262e-55	MES_0	pard6a
7.5958e-60	0.729698	0.209	0.023	1.85186e-55	MES_0	wfdc2
2.17368e-59	1.59826	0.952	0.784	5.29943e-55	MES_0	zgc:162730
5.91318e-57	0.968922	0.227	0.029	1.44163e-52	MES_0	trabd2b
2.03844e-56	1.15695	0.231	0.031	4.96971e-52	MES_0	raly
1.43792e-52	1.09339	0.388	0.094	3.50564e-48	MES_0	hpdb
2.66296e-51	1.52575	0.524	0.183	6.4923e-47	MES_0	fstb
1.65148e-50	1.30937	0.857	0.586	4.02631e-46	MES_0	lum
1.25755e-49	1.40215	0.469	0.142	3.06591e-45	MES_0	nhsl2
1.43464e-48	1.63695	0.74	0.431	3.49764e-44	MES_0	thbs2b
2.28841e-48	1.10909	0.333	0.074	5.57914e-44	MES_0	rgs5a
2.8133e-48	1.2037	0.396	0.108	6.85882e-44	MES_0	spock3
8.66984e-48	1.11021	0.996	0.979	2.11371e-43	MES_0	col6a3.1
3.94449e-47	1.55985	0.725	0.439	9.61666e-43	MES_0	fibinb
5.09577e-47	1.51953	0.451	0.148	1.24235e-42	MES_0	ppp1r1b
3.65014e-46	1.87228	0.901	0.756	8.89905e-42	MES_0	DAB2
3.68989e-46	0.82185	0.201	0.029	8.99596e-42	MES_0	ek1
1.19472e-45	0.912781	1	0.954	2.91273e-41	MES_0	col12a1b
4.74104e-45	1.77564	0.604	0.26	1.15587e-40	MES_0	rbp4
2.4873e-43	1.326	0.956	0.878	6.06405e-39	MES_0	col6a2
7.84628e-43	0.748199	0.209	0.034	1.91292e-38	MES_0	zgc:92161
3.38975e-42	1.7745	0.615	0.305	8.26421e-38	MES_0	cxcl12a
4.3624e-42	1.14067	0.527	0.208	1.06355e-37	MES_0	srpx2
4.53e-42	1.13482	0.465	0.156	1.10441e-37	MES_0	si:ch211-196i2.1
1.04523e-41	1.84652	0.81	0.606	2.54826e-37	MES_0	ccn1
1.31305e-41	1.04817	0.443	0.138	3.20122e-37	MES_0	si:dkeyp-23e4.3
3.0778e-41	1.37696	0.875	0.698	7.50368e-37	MES_0	col18a1a
4.8804e-41	1.05225	0.377	0.108	1.18984e-36	MES_0	smoc2
8.54836e-41	1.16624	0.289	0.067	2.08409e-36	MES_0	mgp
1.53953e-39	1.14586	0.571	0.255	3.75338e-35	MES_0	atrnl1a
1.41177e-38	1.17924	0.857	0.659	3.44189e-34	MES_0	junba
8.15043e-38	1.24339	0.985	0.934	1.98708e-33	MES_0	col6a1
5.28175e-37	1.0084	0.524	0.22	1.28769e-32	MES_0	nid1b
2.95631e-36	1.41803	0.447	0.173	7.20748e-32	MES_0	cebpd
3.13921e-36	1.10104	0.245	0.055	7.6534e-32	MES_0	csmd3a
9.48303e-36	0.809604	0.238	0.051	2.31196e-31	MES_0	grin2bb
4.19111e-34	1.09971	0.473	0.203	1.02179e-29	MES_0	kazald3
8.6291e-34	2.49679	0.451	0.184	2.10377e-29	MES_0	ccl25b
1.91027e-33	0.785669	0.227	0.05	4.65725e-29	MES_0	myt1la
5.59926e-33	1.43001	0.597	0.318	1.3651e-28	MES_0	si:ch211-250c4.4
9.67109e-33	1.12849	0.971	0.874	2.35781e-28	MES_0	postnb
1.25548e-31	0.751123	0.37	0.118	3.06086e-27	MES_0	ptgdsb.2
1.75334e-31	1.09417	0.641	0.371	4.27465e-27	MES_0	loxl2a
3.89496e-31	1.17863	0.238	0.059	9.4959e-27	MES_0	slc25a48
8.75737e-31	1.17615	0.685	0.47	2.13505e-26	MES_0	fndc3bb
1.47397e-30	1.22604	0.308	0.096	3.59355e-26	MES_0	slc40a1
1.86962e-30	1.03369	0.733	0.517	4.55812e-26	MES_0	add3a
3.60479e-30	1.06249	0.593	0.305	8.78847e-26	MES_0	bhmt
2.7106e-29	0.837009	0.894	0.805	6.60844e-25	MES_0	lrp1aa
3.72582e-29	0.633239	0.212	0.048	9.08356e-25	MES_0	antxr1b
5.26043e-29	1.38399	0.443	0.194	1.28249e-24	MES_0	lrrc58b
7.24909e-29	1.34858	0.608	0.375	1.76733e-24	MES_0	nedd9
1.83935e-28	0.972015	0.795	0.602	4.48435e-24	MES_0	tgfb1a
4.83112e-28	0.953251	0.626	0.383	1.17783e-23	MES_0	cav1
6.44006e-28	0.766301	0.3	0.091	1.57009e-23	MES_0	col4a1
8.00669e-28	1.5533	0.707	0.527	1.95203e-23	MES_0	ezrb
2.94136e-27	0.965624	0.842	0.728	7.17105e-23	MES_0	grb10b
9.447e-27	0.861119	0.399	0.165	2.30318e-22	MES_0	CABZ01092746.1
9.61954e-27	1.56455	0.385	0.164	2.34524e-22	MES_0	zgc:174888
1.2969e-26	1.15566	0.432	0.193	3.16183e-22	MES_0	smoc1
1.46283e-26	1.01223	0.234	0.064	3.56639e-22	MES_0	ntrk3a
2.27083e-26	1.17224	0.396	0.161	5.53628e-22	MES_0	dachd
3.3484e-26	0.978973	0.44	0.204	8.16339e-22	MES_0	tmem176
7.22305e-26	1.27464	0.418	0.18	1.76098e-21	MES_0	fstl1a
7.36392e-26	0.906082	0.707	0.461	1.79532e-21	MES_0	itga6b
1.03459e-25	0.97835	0.484	0.248	2.52234e-21	MES_0	pdgfrl
3.28566e-25	0.887548	0.861	0.789	8.01044e-21	MES_0	b2ml
6.68726e-25	1.16763	0.707	0.551	1.63035e-20	MES_0	elmsan1b
8.39763e-25	0.954839	0.597	0.386	2.04734e-20	MES_0	boc
1.05546e-24	1.77276	0.692	0.541	2.5732e-20	MES_0	fosb
2.24169e-24	1.0274	0.381	0.164	5.46524e-20	MES_0	mycb
3.29962e-24	1.10274	0.799	0.664	8.04446e-20	MES_0	fosl1a
6.12413e-24	0.549406	0.993	0.995	1.49306e-19	MES_0	ahnak
9.46892e-24	0.862715	0.824	0.663	2.30852e-19	MES_0	aqp3a
1.01442e-23	1.0205	0.744	0.591	2.47316e-19	MES_0	prkd3
1.19141e-23	1.22146	0.491	0.258	2.90467e-19	MES_0	gadd45ba
1.51961e-23	0.950191	0.692	0.49	3.70482e-19	MES_0	ephb2b
1.76869e-23	0.851353	0.868	0.739	4.31206e-19	MES_0	col11a1a
1.91703e-23	0.945264	0.549	0.323	4.67371e-19	MES_0	twist2
2.48715e-23	0.836778	0.766	0.629	6.06367e-19	MES_0	sdc2
3.58655e-23	1.24591	0.711	0.589	8.74401e-19	MES_0	stat3
4.26222e-23	0.867246	0.505	0.258	1.03913e-18	MES_0	sorcs2
4.45902e-23	1.11929	0.436	0.222	1.08711e-18	MES_0	zgc:171679
4.85685e-23	1.18719	0.355	0.151	1.1841e-18	MES_0	CT030129.1
5.27813e-23	1.27649	0.557	0.345	1.28681e-18	MES_0	dennd4a
5.33385e-23	1.01813	0.421	0.202	1.30039e-18	MES_0	hgd
9.0194e-23	0.875418	0.755	0.554	2.19893e-18	MES_0	npr1a
3.29391e-22	1.05987	0.615	0.457	8.03055e-18	MES_0	glulb
3.7207e-22	0.668867	0.278	0.094	9.07107e-18	MES_0	col4a2
4.03668e-22	0.719455	0.425	0.197	9.84143e-18	MES_0	BX663503.3
5.38347e-22	1.03459	0.7	0.555	1.31249e-17	MES_0	myo9aa
6.00113e-22	0.735538	0.216	0.064	1.46307e-17	MES_0	si:ch73-52p7.1
6.53516e-22	1.19224	0.513	0.314	1.59327e-17	MES_0	acsl4b
7.34414e-22	0.882544	0.421	0.205	1.7905e-17	MES_0	csf1b
7.56086e-22	0.653346	0.216	0.064	1.84334e-17	MES_0	ttc36
1.02138e-21	1.17897	0.777	0.737	2.49011e-17	MES_0	fhl3a
1.41419e-21	1.1932	0.615	0.443	3.4478e-17	MES_0	RALGDS
1.44608e-21	1.03967	0.744	0.609	3.52555e-17	MES_0	dusp5
3.84395e-21	0.809585	0.989	0.945	9.37155e-17	MES_0	col12a1a
4.95695e-21	0.749426	0.886	0.842	1.2085e-16	MES_0	mcl1a
4.9874e-21	0.768714	0.366	0.16	1.21593e-16	MES_0	dpyda.3
1.25399e-20	1.24936	0.44	0.24	3.05723e-16	MES_0	bhlhe40
1.28533e-20	0.913073	0.769	0.656	3.13363e-16	MES_0	sept9a
1.65082e-20	0.94202	0.692	0.57	4.02471e-16	MES_0	pptc7a
1.93837e-20	0.805445	0.894	0.848	4.72574e-16	MES_0	sdc4
2.57108e-20	0.447727	0.549	0.264	6.2683e-16	MES_0	cdh11
5.00311e-20	1.00862	0.462	0.255	1.21976e-15	MES_0	emilin1b
5.64887e-20	0.749038	0.788	0.648	1.3772e-15	MES_0	rbms3
5.91535e-20	1.25119	0.597	0.432	1.44216e-15	MES_0	cavin2b
1.4387e-19	1.2431	0.674	0.504	3.50755e-15	MES_0	si:ch73-335l21.4
2.18822e-19	0.880905	0.289	0.115	5.33487e-15	MES_0	scara3
2.28608e-19	0.642426	0.216	0.069	5.57346e-15	MES_0	BX908782.2
2.57184e-19	0.74153	0.297	0.115	6.27014e-15	MES_0	c4
2.89163e-19	1.51728	0.718	0.588	7.0498e-15	MES_0	fosab
3.90665e-19	0.898237	0.487	0.26	9.52442e-15	MES_0	col6a4a
3.90767e-19	0.841078	0.564	0.366	9.5269e-15	MES_0	ecm1b
5.76958e-19	1.76157	0.326	0.147	1.40662e-14	MES_0	ccn2a
1.1136e-18	0.977805	0.7	0.565	2.71495e-14	MES_0	ccnd2a
2.45746e-18	0.5705	0.989	0.963	5.99129e-14	MES_0	pleca
2.6979e-18	0.923199	0.535	0.358	6.57748e-14	MES_0	nt5e
4.19176e-18	0.776809	0.3	0.126	1.02195e-13	MES_0	BX663516.2
9.43955e-18	0.808155	0.293	0.125	2.30136e-13	MES_0	col5a3b
9.9405e-18	0.889907	0.619	0.39	2.42349e-13	MES_0	itgb4
1.01844e-17	0.895677	0.403	0.209	2.48295e-13	MES_0	zgc:152791
1.28068e-17	0.345973	0.996	0.998	3.1223e-13	MES_0	CR383676.2
1.33654e-17	1.02502	0.744	0.644	3.25849e-13	MES_0	zgc:193505
1.64355e-17	0.845469	0.443	0.25	4.00698e-13	MES_0	nfixa
1.92947e-17	0.98276	0.7	0.606	4.70405e-13	MES_0	zgc:100829
2.02263e-17	1.03047	0.579	0.42	4.93118e-13	MES_0	si:ch211-178n15.1
2.06179e-17	1.2325	0.363	0.18	5.02665e-13	MES_0	rgs5b
2.3203e-17	0.863018	0.41	0.221	5.65689e-13	MES_0	emilin2a
3.39615e-17	0.933968	0.286	0.123	8.27981e-13	MES_0	fbxo32
3.42111e-17	0.826939	0.289	0.123	8.34067e-13	MES_0	sort1a
3.81282e-17	0.927406	0.604	0.453	9.29566e-13	MES_0	BX908797.1
3.92475e-17	0.903816	0.615	0.481	9.56853e-13	MES_0	btg2
4.01431e-17	0.82251	0.597	0.42	9.78689e-13	MES_0	vwa1
4.81772e-17	0.984805	0.264	0.109	1.17456e-12	MES_0	pcdh19
4.82845e-17	0.909864	0.509	0.335	1.17718e-12	MES_0	neu3.2
5.14833e-17	1.01088	0.249	0.1	1.25516e-12	MES_0	prex1
6.72502e-17	0.853476	0.747	0.714	1.63956e-12	MES_0	fosl2
8.03185e-17	0.985029	0.436	0.251	1.95817e-12	MES_0	selenop
1.01512e-16	0.353863	0.996	0.998	2.47486e-12	MES_0	mt-co1
1.65989e-16	0.983403	0.718	0.624	4.04681e-12	MES_0	ucp2
1.90744e-16	0.350931	0.473	0.238	4.65034e-12	MES_0	si:ch211-67e16.11
2.50224e-16	0.81677	0.758	0.698	6.10045e-12	MES_0	loxl2b
3.24459e-16	0.591259	0.982	0.934	7.91032e-12	MES_0	col1a1b
5.03862e-16	0.838522	0.513	0.327	1.22841e-11	MES_0	ppap2d
5.16604e-16	0.799709	0.275	0.113	1.25948e-11	MES_0	prex2
5.81214e-16	0.709739	0.758	0.681	1.417e-11	MES_0	pard3bb
7.26042e-16	0.89106	0.319	0.151	1.77009e-11	MES_0	adma
8.05562e-16	1.04566	0.37	0.194	1.96396e-11	MES_0	glis1a
8.4047e-16	0.887547	0.403	0.229	2.04907e-11	MES_0	csrnp1b
1.52889e-15	0.894209	0.333	0.158	3.72744e-11	MES_0	hmcn1
1.89516e-15	0.619611	0.802	0.724	4.62041e-11	MES_0	tns1b
2.70319e-15	0.75826	0.381	0.213	6.59038e-11	MES_0	frem1b
3.20883e-15	0.735686	0.289	0.133	7.82314e-11	MES_0	si:ch211-132b12.7
3.65486e-15	0.709369	0.242	0.095	8.91055e-11	MES_0	man1b1a
3.87969e-15	0.946811	0.773	0.756	9.45869e-11	MES_0	midn
3.95526e-15	1.15481	0.604	0.485	9.64292e-11	MES_0	plxnb2a
5.82274e-15	1.17053	0.597	0.478	1.41958e-10	MES_0	slc4a7
7.71747e-15	0.803158	0.784	0.694	1.88152e-10	MES_0	lsp1a
7.83662e-15	0.934139	0.67	0.548	1.91057e-10	MES_0	ivns1abpa
9.23781e-15	0.874041	0.212	0.082	2.25218e-10	MES_0	gch1
1.3542e-14	0.740866	0.645	0.551	3.30154e-10	MES_0	prelid3b
1.73224e-14	0.966065	0.473	0.317	4.2232e-10	MES_0	tmbim1a
1.8818e-14	0.683428	0.645	0.526	4.58783e-10	MES_0	pim1
2.54176e-14	0.942872	0.253	0.105	6.1968e-10	MES_0	si:ch211-76l23.4
2.59388e-14	0.871479	0.418	0.253	6.32388e-10	MES_0	mafk
3.10451e-14	1.18076	0.396	0.23	7.56881e-10	MES_0	btbd11b
3.82052e-14	1.03702	0.363	0.205	9.31442e-10	MES_0	capn12
6.45321e-14	0.306553	0.832	0.695	1.57329e-09	MES_0	krt15
7.70644e-14	0.758315	0.733	0.675	1.87883e-09	MES_0	jund
8.15449e-14	0.657001	0.352	0.184	1.98807e-09	MES_0	ndnf
9.11694e-14	0.801465	0.498	0.346	2.22271e-09	MES_0	tuft1a
1.01999e-13	0.858375	0.443	0.291	2.48675e-09	MES_0	disp1
1.59019e-13	0.801557	0.938	0.919	3.87688e-09	MES_0	col5a2a
1.94836e-13	0.598407	0.418	0.238	4.75011e-09	MES_0	si:ch211-1a19.3
2.01821e-13	0.754233	0.216	0.086	4.92039e-09	MES_0	thbs2a
2.45487e-13	1.25372	0.462	0.33	5.98498e-09	MES_0	chmp6b
3.20118e-13	0.958923	0.355	0.198	7.80447e-09	MES_0	fstl3
3.62335e-13	0.748489	0.22	0.094	8.83372e-09	MES_0	txnipa
3.68843e-13	0.751707	0.359	0.208	8.9924e-09	MES_0	prnprs3
4.55043e-13	0.784487	0.366	0.214	1.10939e-08	MES_0	ccdc3b
4.82592e-13	0.74198	0.711	0.636	1.17656e-08	MES_0	tcf12
5.08737e-13	0.748535	0.571	0.451	1.2403e-08	MES_0	C18H15orf48
5.80103e-13	0.812582	0.652	0.567	1.41429e-08	MES_0	cdc42ep4b
8.25539e-13	0.715896	0.282	0.137	2.01266e-08	MES_0	zbtb16b
9.65372e-13	1.1978	0.476	0.336	2.35358e-08	MES_0	socs3a
1.13421e-12	0.650527	0.223	0.098	2.76521e-08	MES_0	calcrlb
1.56856e-12	0.666954	0.78	0.734	3.82415e-08	MES_0	SBNO2
2.1162e-12	0.91165	0.56	0.442	5.15929e-08	MES_0	vav2
2.2325e-12	0.636199	0.205	0.086	5.44285e-08	MES_0	malt3
2.96027e-12	0.829171	0.473	0.334	7.21713e-08	MES_0	hhla2a.1
3.73834e-12	0.752247	0.275	0.139	9.11408e-08	MES_0	pdgfd
4.72027e-12	0.760749	0.733	0.729	1.1508e-07	MES_0	kdm6ba
4.72258e-12	0.778418	0.538	0.414	1.15136e-07	MES_0	cdon
9.01972e-12	0.58124	0.454	0.276	2.19901e-07	MES_0	itga11b
1.07504e-11	0.785786	0.513	0.383	2.62095e-07	MES_0	ehd2b
1.13151e-11	0.860254	0.751	0.701	2.75861e-07	MES_0	jak1
1.28975e-11	0.826034	0.637	0.531	3.14442e-07	MES_0	ror2
1.72744e-11	0.617872	0.777	0.75	4.21149e-07	MES_0	slc1a5
1.78823e-11	0.649681	0.322	0.179	4.35971e-07	MES_0	id3
1.83808e-11	0.77687	0.557	0.443	4.48123e-07	MES_0	slc2a1b
2.34991e-11	0.551306	0.253	0.124	5.72908e-07	MES_0	chd5
2.49908e-11	0.610561	0.821	0.771	6.09276e-07	MES_0	mhc1zba
3.22316e-11	0.508935	0.293	0.153	7.85805e-07	MES_0	pigr
3.71063e-11	0.726002	0.26	0.133	9.04652e-07	MES_0	cnksr1
3.87929e-11	0.72038	0.421	0.285	9.45772e-07	MES_0	twsg1a
4.03532e-11	0.715671	0.571	0.474	9.8381e-07	MES_0	pdlim7
4.39733e-11	0.816256	0.828	0.83	1.07207e-06	MES_0	col16a1
4.88008e-11	0.664577	0.736	0.719	1.18976e-06	MES_0	rsrp1
5.3835e-11	0.88301	0.557	0.432	1.3125e-06	MES_0	kif26ba
5.53249e-11	0.792359	0.256	0.131	1.34882e-06	MES_0	si:ch211-210g13.5
5.82298e-11	0.536407	0.593	0.449	1.41964e-06	MES_0	celf2
5.90847e-11	0.67767	0.659	0.539	1.44049e-06	MES_0	f13a1b
6.10181e-11	0.417988	0.985	0.958	1.48762e-06	MES_0	si:dkey-193p11.2
6.40534e-11	0.895112	0.425	0.292	1.56162e-06	MES_0	mych
6.89019e-11	0.830592	0.663	0.617	1.67983e-06	MES_0	tob1b
7.77549e-11	0.617075	0.319	0.183	1.89566e-06	MES_0	si:ch1073-291c23.2
8.05078e-11	0.480248	0.908	0.892	1.96278e-06	MES_0	hivep2a
8.05743e-11	0.574141	0.267	0.134	1.9644e-06	MES_0	slc51a
1.06351e-10	0.637918	0.762	0.739	2.59284e-06	MES_0	gpm6bb
1.29236e-10	0.877283	0.399	0.266	3.15077e-06	MES_0	id1
1.33637e-10	0.925833	0.308	0.177	3.25808e-06	MES_0	si:ch73-335l21.1
1.48601e-10	0.546438	0.667	0.589	3.6229e-06	MES_0	reck
1.99181e-10	1.05435	0.549	0.467	4.85603e-06	MES_0	zfp36l1b
2.04178e-10	0.863679	0.322	0.191	4.97785e-06	MES_0	ugt5f1
2.04965e-10	0.652145	0.278	0.149	4.99705e-06	MES_0	ca6
2.52052e-10	0.795496	0.681	0.591	6.14503e-06	MES_0	egr1
4.25784e-10	0.745624	0.293	0.168	1.03806e-05	MES_0	nav1b
4.43482e-10	0.806205	0.568	0.465	1.08121e-05	MES_0	CR848683.2
5.59342e-10	0.84356	0.304	0.179	1.36368e-05	MES_0	skilb
6.69421e-10	0.705358	0.275	0.154	1.63205e-05	MES_0	msrb3
8.42416e-10	0.77664	0.275	0.154	2.05381e-05	MES_0	NPAS3
8.72708e-10	0.557603	0.692	0.624	2.12766e-05	MES_0	mxra8b
8.81113e-10	0.761967	0.223	0.108	2.14815e-05	MES_0	sema5ba
9.08099e-10	0.684217	0.388	0.255	2.21394e-05	MES_0	zgc:56585
9.41309e-10	0.693172	0.601	0.496	2.29491e-05	MES_0	fhl3b
9.8845e-10	0.617045	0.223	0.107	2.40984e-05	MES_0	fhl2a
1.0006e-09	0.790029	0.447	0.333	2.43946e-05	MES_0	maff
1.20656e-09	0.576728	0.806	0.799	2.94158e-05	MES_0	macf1a
1.3487e-09	0.875997	0.711	0.688	3.28814e-05	MES_0	glsb
1.57456e-09	0.689562	0.59	0.48	3.83878e-05	MES_0	pnp5a
1.6105e-09	0.595847	0.758	0.712	3.92639e-05	MES_0	hbegfa
1.64399e-09	0.851452	0.462	0.355	4.00805e-05	MES_0	pkn1a
2.16255e-09	0.772245	0.568	0.47	5.27231e-05	MES_0	cavin1b
2.19251e-09	0.564938	0.293	0.165	5.34533e-05	MES_0	sult2st3
2.34275e-09	0.7161	0.399	0.282	5.71161e-05	MES_0	dagla
2.3515e-09	0.721198	0.502	0.393	5.73296e-05	MES_0	si:dkey-247k7.2
2.53488e-09	0.478331	0.234	0.119	6.18003e-05	MES_0	rnd3b
3.5022e-09	0.892547	0.385	0.265	8.53836e-05	MES_0	si:ch211-165e15.1
3.97886e-09	1.0146	0.535	0.465	9.70046e-05	MES_0	mvp
4.19832e-09	0.743626	0.571	0.487	0.000102355	MES_0	tmod2
4.42979e-09	0.672333	0.231	0.122	0.000107998	MES_0	flrt3
4.57529e-09	0.696279	0.568	0.491	0.000111546	MES_0	stat1a
4.59762e-09	0.734034	0.41	0.299	0.00011209	MES_0	slc25a25a
6.43158e-09	0.81619	0.601	0.546	0.000156802	MES_0	csnk1da
6.45392e-09	0.710643	0.696	0.635	0.000157347	MES_0	nfatc1
6.61944e-09	0.75365	0.44	0.336	0.000161382	MES_0	nfe2l2a
7.15163e-09	0.667996	0.766	0.771	0.000174357	MES_0	ubb
7.28258e-09	0.75147	0.634	0.588	0.000177549	MES_0	cebpb
7.94816e-09	0.600557	0.612	0.553	0.000193776	MES_0	aebp1
8.07979e-09	0.538322	0.311	0.186	0.000196985	MES_0	clcf1
9.1943e-09	0.65019	0.282	0.169	0.000224157	MES_0	CABZ01071903.1
1.02122e-08	0.955569	0.381	0.265	0.000248972	MES_0	tmtc1
1.06002e-08	0.686729	0.597	0.523	0.000258432	MES_0	dip2ca
1.11858e-08	0.759295	0.564	0.491	0.00027271	MES_0	ches1
1.32791e-08	0.65986	0.407	0.29	0.000323746	MES_0	numbl
1.47744e-08	0.565383	0.751	0.727	0.0003602	MES_0	bzw1b
2.00649e-08	0.814753	0.322	0.207	0.000489181	MES_0	tox2
2.04568e-08	0.544886	0.311	0.195	0.000498737	MES_0	slco2b1
2.23319e-08	0.744958	0.564	0.497	0.000544452	MES_0	enox2
2.52347e-08	0.601755	0.333	0.216	0.000615222	MES_0	lxn
2.60374e-08	0.651071	0.663	0.63	0.000634792	MES_0	ier2b
3.82367e-08	0.660859	0.974	0.977	0.000932212	MES_0	col5a1
3.83759e-08	0.75645	0.44	0.337	0.000935605	MES_0	si:dkey-16l2.20
4.29249e-08	0.836597	0.37	0.265	0.00104651	MES_0	arrdc3a
4.64845e-08	0.962035	0.223	0.119	0.00113329	MES_0	abcb5
4.65027e-08	0.676962	0.542	0.476	0.00113374	MES_0	zgc:77486.1
4.87167e-08	0.633025	0.341	0.237	0.00118771	MES_0	rab40b
4.87533e-08	0.627816	0.557	0.481	0.0011886	MES_0	cst3
6.00959e-08	0.622584	0.231	0.128	0.00146514	MES_0	pbxip1b
6.01667e-08	1.05959	0.308	0.198	0.00146686	MES_0	pfkfb3
6.35309e-08	0.470165	0.681	0.667	0.00154888	MES_0	selenow1
7.04102e-08	0.594587	0.212	0.114	0.0017166	MES_0	nfil3-6
7.06659e-08	0.689911	0.637	0.582	0.00172283	MES_0	enpp1
7.32054e-08	0.582694	0.238	0.135	0.00178475	MES_0	sema3aa
7.85343e-08	0.878323	0.425	0.328	0.00191467	MES_0	map3k22
8.46727e-08	0.687278	0.59	0.536	0.00206432	MES_0	rnf213a
9.75344e-08	0.697558	0.388	0.282	0.00237789	MES_0	BX465862.4
9.89671e-08	0.515565	0.227	0.125	0.00241282	MES_0	spink2.1
1.00163e-07	0.751794	0.22	0.121	0.00244198	MES_0	CU984579.1
1.90161e-07	0.852505	0.381	0.285	0.00463612	MES_0	dusp1
1.96423e-07	0.497094	0.418	0.298	0.00478878	MES_0	pth1r
1.97831e-07	0.569528	0.289	0.183	0.00482312	MES_0	cd151
2.06876e-07	0.664402	0.495	0.405	0.00504364	MES_0	myo1ea
2.60197e-07	0.68139	0.685	0.649	0.0063436	MES_0	zgc:111983
2.7709e-07	0.445613	0.703	0.724	0.00675545	MES_0	rab10
2.79247e-07	0.616275	0.604	0.55	0.00680804	MES_0	lhfpl6
2.99252e-07	0.678747	0.418	0.32	0.00729577	MES_0	adck1
3.21e-07	0.737523	0.352	0.257	0.00782599	MES_0	fam13b
3.2984e-07	0.948453	0.564	0.483	0.0080415	MES_0	si:ch211-69b7.6
3.38127e-07	0.703704	0.443	0.364	0.00824355	MES_0	si:ch73-138n13.1
3.89521e-07	0.388807	0.403	0.292	0.00949653	MES_0	itga8
4.2622e-07	0.495912	0.275	0.173	0.0103912	MES_0	hopx
4.80858e-07	1.01787	0.407	0.307	0.0117233	MES_0	csf1a
4.82507e-07	0.765644	0.256	0.159	0.0117635	MES_0	sh2d3cb
5.15963e-07	0.886528	0.505	0.441	0.0125792	MES_0	adam8b
5.22333e-07	0.684383	0.44	0.347	0.0127345	MES_0	si:dkey-240h12.3
5.6243e-07	0.610827	0.634	0.624	0.013712	MES_0	zfand5a
5.72856e-07	0.888475	0.498	0.431	0.0139662	MES_0	sik2b
6.69396e-07	0.49568	0.216	0.121	0.0163199	MES_0	eml1
6.92953e-07	0.601168	0.443	0.357	0.0168942	MES_0	ablim1b
8.92981e-07	0.410203	0.725	0.719	0.0217709	MES_0	itm2ba
9.55631e-07	0.492637	0.311	0.205	0.0232983	MES_0	znf385b
1.10813e-06	0.603992	0.253	0.159	0.0270162	MES_0	LO018680.1
1.13605e-06	0.687541	0.264	0.173	0.0276969	MES_0	mfge8a
1.16888e-06	0.395728	0.857	0.842	0.0284974	MES_0	cd63
1.22511e-06	0.49932	0.744	0.74	0.0298682	MES_0	tnfrsfa
1.29873e-06	0.638364	0.282	0.191	0.031663	MES_0	efna1a
1.63157e-06	0.673717	0.374	0.284	0.0397777	MES_0	ism1
1.95089e-06	0.63206	0.429	0.341	0.0475627	MES_0	ccdc80
2.01157e-06	0.632617	0.407	0.315	0.0490422	MES_0	nuak1b
9.34958e-122	2.03208	0.922	0.245	2.27943e-117	MES_1	cdh11
9.37219e-91	2.59833	0.9	0.477	2.28494e-86	MES_1	si:dkey-12l12.1
2.08934e-73	1.05778	0.313	0.039	5.09381e-69	MES_1	epha4b
1.91451e-61	0.925626	0.413	0.079	4.66758e-57	MES_1	fibina
7.81618e-56	1.22852	0.987	0.886	1.90559e-51	MES_1	krt8
4.25938e-52	1.26453	0.93	0.757	1.03844e-47	MES_1	krt18b
6.39014e-47	1.03635	0.5	0.151	1.55792e-42	MES_1	eno1a
1.12915e-46	0.766757	0.652	0.215	2.75288e-42	MES_1	ncam1a
2.79692e-46	1.48717	0.852	0.54	6.81888e-42	MES_1	aebp1
1.16881e-42	0.443051	0.222	0.032	2.84955e-38	MES_1	slc41a1
1.27653e-42	1.14507	0.47	0.14	3.11218e-38	MES_1	ccn2a
8.85207e-41	0.657535	0.222	0.034	2.15813e-36	MES_1	pkdcca
1.77774e-38	1.11867	0.465	0.149	4.33412e-34	MES_1	adcy2b
1.47626e-37	0.93161	1	0.933	3.59911e-33	MES_1	col1a1b
2.00802e-37	1.08563	0.852	0.493	4.89555e-33	MES_1	cspg4
1.25416e-36	1.03612	0.304	0.068	3.05765e-32	MES_1	spp1
2.73346e-36	1.06581	0.7	0.356	6.66418e-32	MES_1	p3h2
8.2382e-36	0.641946	0.335	0.083	2.00847e-31	MES_1	sgcg
3.62075e-35	1.14445	0.926	0.834	8.82738e-31	MES_1	krt18a.1
4.95721e-35	1.35214	0.7	0.334	1.20857e-30	MES_1	si:ch1073-459j12.1
2.06111e-34	0.755751	0.991	0.958	5.02499e-30	MES_1	cd81a
3.50191e-34	0.867594	0.561	0.222	8.53766e-30	MES_1	scube3
5.33189e-34	1.13103	0.87	0.62	1.29991e-29	MES_1	pmp22b
1.96767e-33	0.429292	0.235	0.046	4.79719e-29	MES_1	mcama
3.73365e-33	0.974507	0.578	0.246	9.10264e-29	MES_1	adgrl2a
1.24087e-32	0.697348	0.335	0.092	3.02525e-28	MES_1	eepd1
4.51947e-31	1.05839	0.452	0.167	1.10185e-26	MES_1	map1ab
1.61217e-30	1.76678	0.622	0.317	3.93046e-26	MES_1	col7a1
4.74343e-30	0.786926	0.635	0.312	1.15645e-25	MES_1	tnfrsf21
4.97936e-30	0.619433	0.217	0.045	1.21397e-25	MES_1	TCIM
1.24586e-29	1.61142	0.474	0.182	3.03741e-25	MES_1	tnn
2.48724e-29	1.07762	0.917	0.729	6.06389e-25	MES_1	serpine1
2.60505e-29	0.864667	0.748	0.399	6.35112e-25	MES_1	runx2a
8.44497e-29	0.967146	0.622	0.287	2.05888e-24	MES_1	pth1r
2.54392e-28	1.11816	0.83	0.628	6.20207e-24	MES_1	nfatc1
6.72278e-28	0.522656	0.248	0.059	1.63901e-23	MES_1	nkain2
6.93267e-28	0.581802	0.257	0.062	1.69018e-23	MES_1	rnd1b
8.87955e-28	1.07042	0.83	0.642	2.16484e-23	MES_1	klf6a
1.9761e-27	0.911095	0.639	0.328	4.81773e-23	MES_1	htra1a
6.8142e-27	0.834703	0.7	0.381	1.6613e-22	MES_1	cav1
9.1708e-27	0.653023	0.4	0.14	2.23584e-22	MES_1	clic2
4.48923e-25	1.02559	0.522	0.234	1.09447e-20	MES_1	si:ch211-1a19.3
4.95169e-25	0.833131	0.222	0.053	1.20722e-20	MES_1	neurl1b
7.0159e-25	0.843412	0.204	0.046	1.71048e-20	MES_1	foxo6b
1.05769e-23	0.983071	0.287	0.087	2.57864e-19	MES_1	mt2
1.07392e-23	0.6718	0.996	0.952	2.61822e-19	MES_1	col1a2
1.12039e-23	0.430308	0.317	0.101	2.73151e-19	MES_1	bmp2b
1.12892e-23	0.640027	0.361	0.13	2.7523e-19	MES_1	ugdh
1.12911e-23	1.05435	0.483	0.214	2.75277e-19	MES_1	sulf1
1.21115e-23	0.415886	0.304	0.089	2.95277e-19	MES_1	itga10
1.97169e-23	0.465937	0.23	0.061	4.80699e-19	MES_1	wnt7bb
2.6859e-23	1.03578	0.761	0.512	6.54823e-19	MES_1	si:busm1-57f23.1
6.96292e-23	0.618052	0.43	0.175	1.69756e-18	MES_1	adgrl3.1
1.33844e-22	0.552624	0.361	0.129	3.26311e-18	MES_1	zeb2a
2.12084e-22	0.575477	0.43	0.168	5.1706e-18	MES_1	mef2cb
2.56401e-22	0.715335	0.587	0.294	6.25107e-18	MES_1	slc6a8
4.01392e-22	0.655794	0.357	0.126	9.78594e-18	MES_1	si:ch211-210g13.5
4.54853e-22	0.562594	0.483	0.204	1.10893e-17	MES_1	fpr1
9.87876e-22	1.2463	0.283	0.097	2.40844e-17	MES_1	phex
3.52229e-21	0.544891	0.996	0.963	8.58733e-17	MES_1	pleca
7.79278e-21	0.86406	0.304	0.104	1.89988e-16	MES_1	si:ch211-76l23.4
9.49315e-21	0.403314	0.243	0.07	2.31443e-16	MES_1	eva1a
2.64362e-20	0.713685	0.352	0.137	6.44514e-16	MES_1	has1
2.70682e-20	1.70969	0.265	0.086	6.59924e-16	MES_1	wif1
1.01408e-19	0.667714	0.43	0.189	2.47233e-15	MES_1	thrap3a
1.05647e-19	0.714885	0.822	0.608	2.57568e-15	MES_1	ccn1
1.08645e-19	0.567841	0.274	0.09	2.64877e-15	MES_1	ace
1.33808e-19	0.582084	0.943	0.817	3.26225e-15	MES_1	lmna
4.87866e-19	0.731641	0.539	0.282	1.18942e-14	MES_1	ANPEP
4.89917e-19	0.476174	0.378	0.157	1.19442e-14	MES_1	2024-09-15
6.58515e-19	0.629826	0.343	0.132	1.60546e-14	MES_1	lrrc4ca
8.76634e-19	0.612303	0.93	0.869	2.13723e-14	MES_1	mmp14a
1.57752e-18	0.673896	0.404	0.18	3.84599e-14	MES_1	nrp1a
1.69263e-18	1.20673	0.77	0.598	4.12664e-14	MES_1	serpine2
1.74656e-18	0.77197	0.574	0.334	4.25811e-14	MES_1	ccdc80
4.63096e-18	0.765681	0.504	0.272	1.12903e-13	MES_1	creb3l1
4.7833e-18	1.29363	0.626	0.435	1.16617e-13	MES_1	inhbaa
7.06746e-18	0.642999	0.465	0.227	1.72305e-13	MES_1	nid1b
7.14424e-18	0.832813	0.609	0.357	1.74177e-13	MES_1	fgfr3
9.63935e-18	0.684023	0.665	0.421	2.35007e-13	MES_1	gsna
1.30934e-17	0.779645	0.813	0.617	3.19216e-13	MES_1	mxra8b
1.37629e-17	0.592335	0.57	0.319	3.3554e-13	MES_1	pld7
1.58698e-17	0.582052	0.378	0.16	3.86906e-13	MES_1	lfng
2.3726e-17	0.364305	0.217	0.066	5.78441e-13	MES_1	pcdh12
2.71603e-17	0.329863	0.243	0.08	6.62169e-13	MES_1	ankha
3.61007e-17	0.511025	0.404	0.18	8.80134e-13	MES_1	mtmr11
6.08694e-17	0.609736	0.526	0.271	1.484e-12	MES_1	fmnl3
7.3951e-17	0.831096	0.413	0.198	1.80293e-12	MES_1	inhbab
1.06615e-16	0.312978	0.2	0.059	2.59929e-12	MES_1	abi1b
1.1014e-16	0.521677	0.348	0.144	2.6852e-12	MES_1	gpc5c
1.55563e-16	0.569016	0.335	0.141	3.79263e-12	MES_1	hs3st3b1b
1.64197e-16	0.836326	0.6	0.357	4.00312e-12	MES_1	pde10a
2.92136e-16	0.533953	0.27	0.099	7.12227e-12	MES_1	hyal4
3.4365e-16	0.333306	0.257	0.092	8.37818e-12	MES_1	c1qtnf6b
3.51506e-16	0.852612	0.474	0.241	8.56971e-12	MES_1	arvcfb
4.39275e-16	0.414057	0.396	0.172	1.07095e-11	MES_1	angptl1a
6.27524e-16	1.18376	0.783	0.623	1.5299e-11	MES_1	trps1
7.12056e-16	0.644804	0.609	0.379	1.73599e-11	MES_1	ehd2b
1.00308e-15	0.614671	0.665	0.406	2.44551e-11	MES_1	CR848833.1
2.02451e-15	0.438293	0.352	0.156	4.93575e-11	MES_1	mid1
2.08953e-15	0.42627	0.317	0.13	5.09427e-11	MES_1	ttyh2
3.36142e-15	0.595774	0.913	0.887	8.19514e-11	MES_1	s100a10b
3.54267e-15	0.534714	0.57	0.321	8.63704e-11	MES_1	map3k22
5.42984e-15	0.824143	0.209	0.069	1.3238e-10	MES_1	syt7b
7.75581e-15	1.22807	0.465	0.239	1.89087e-10	MES_1	mmp9
1.05815e-14	0.556587	0.365	0.164	2.57977e-10	MES_1	si:ch211-170d8.8
1.46954e-14	0.536617	0.683	0.464	3.58273e-10	MES_1	cavin1b
2.24429e-14	0.541606	0.361	0.164	5.47157e-10	MES_1	mamdc2a
4.08276e-14	0.411774	0.248	0.094	9.95377e-10	MES_1	intu
4.67913e-14	0.418979	0.452	0.238	1.14077e-09	MES_1	tsc22d3
7.19811e-14	0.75173	0.648	0.442	1.7549e-09	MES_1	gpc1b
9.5289e-14	0.562306	0.552	0.343	2.32315e-09	MES_1	ckba
1.1141e-13	0.47401	0.991	0.976	2.71618e-09	MES_1	col5a1
1.70367e-13	0.593963	0.383	0.184	4.15355e-09	MES_1	ndnf
1.84671e-13	0.622212	0.443	0.236	4.50228e-09	MES_1	abcc6a
1.94013e-13	0.379033	0.283	0.118	4.73003e-09	MES_1	foxn2b
1.95377e-13	2.03266	0.422	0.225	4.76328e-09	MES_1	clu
2.19489e-13	0.482593	0.3	0.128	5.35115e-09	MES_1	il34
3.05636e-13	0.512644	0.443	0.236	7.45142e-09	MES_1	si:ch211-156j16.1
3.53954e-13	0.270949	0.209	0.074	8.6294e-09	MES_1	rgcc
3.77396e-13	0.530273	0.865	0.788	9.20092e-09	MES_1	msna
4.31258e-13	0.386679	0.278	0.115	1.05141e-08	MES_1	efnb2b
4.87377e-13	1.24127	0.796	0.699	1.18822e-08	MES_1	tnc
5.63159e-13	0.377397	0.952	0.918	1.37298e-08	MES_1	col5a2a
7.35179e-13	0.597941	0.626	0.423	1.79237e-08	MES_1	hspd1
2.07249e-12	0.375413	0.974	0.947	5.05273e-08	MES_1	col12a1a
2.74358e-12	0.419489	0.296	0.136	6.68884e-08	MES_1	cdkn1a
2.76792e-12	0.426722	0.335	0.159	6.74818e-08	MES_1	taok3a
3.67027e-12	0.70993	0.7	0.501	8.94811e-08	MES_1	klhl4
4.94276e-12	0.437151	0.743	0.605	1.20504e-07	MES_1	reep5
5.50961e-12	0.49717	0.422	0.236	1.34324e-07	MES_1	pgam1a
7.23737e-12	0.349271	0.33	0.155	1.76447e-07	MES_1	ugp2b
7.70457e-12	0.617379	0.778	0.555	1.87838e-07	MES_1	npr1a
8.17256e-12	0.316471	0.752	0.526	1.99247e-07	MES_1	ezrb
9.79984e-12	0.370057	0.296	0.135	2.3892e-07	MES_1	wtip
9.98578e-12	0.451409	0.491	0.28	2.43453e-07	MES_1	rgs3a
1.27978e-11	0.540502	0.339	0.178	3.12011e-07	MES_1	tuba1a
1.31254e-11	0.708831	0.743	0.54	3.19997e-07	MES_1	fosb
1.46185e-11	0.511695	0.757	0.544	3.56398e-07	MES_1	ivns1abpa
1.57526e-11	0.384937	0.483	0.28	3.84048e-07	MES_1	oxsr1a
1.65913e-11	0.446313	0.443	0.25	4.04495e-07	MES_1	prdx1
1.73107e-11	0.393681	0.439	0.244	4.22035e-07	MES_1	ano6
1.78472e-11	0.487295	0.483	0.285	4.35114e-07	MES_1	LO018188.1
1.9847e-11	0.388024	0.339	0.17	4.83869e-07	MES_1	shroom4
1.99421e-11	0.495013	0.596	0.377	4.86188e-07	MES_1	loxl2a
2.41277e-11	0.466625	0.7	0.475	5.88233e-07	MES_1	glis1b
2.96319e-11	0.396254	0.339	0.168	7.22426e-07	MES_1	wnt10a
3.15593e-11	0.411839	0.53	0.325	7.69416e-07	MES_1	efna5a
3.32021e-11	1.21816	0.548	0.373	8.09468e-07	MES_1	igf2b
3.42754e-11	0.52351	0.461	0.273	8.35635e-07	MES_1	fam102ab
4.15918e-11	0.614509	0.804	0.702	1.01401e-06	MES_1	lrrc17
4.48249e-11	0.43947	0.574	0.369	1.09283e-06	MES_1	rgs12a
4.63717e-11	0.423799	0.322	0.162	1.13054e-06	MES_1	slc16a3
5.07391e-11	0.649873	0.761	0.587	1.23702e-06	MES_1	fosab
6.22562e-11	0.391723	0.387	0.206	1.51781e-06	MES_1	arhgef10
6.5409e-11	0.723798	0.435	0.264	1.59467e-06	MES_1	smurf2
7.08517e-11	0.713199	0.204	0.082	1.72737e-06	MES_1	unc5a
7.21142e-11	0.417759	0.396	0.212	1.75814e-06	MES_1	fam20cb
9.02507e-11	0.290005	0.413	0.222	2.20031e-06	MES_1	arhgap21a
1.13271e-10	0.648166	0.622	0.43	2.76155e-06	MES_1	jun
1.18437e-10	0.413593	0.422	0.242	2.8875e-06	MES_1	phb
1.63051e-10	0.373038	0.448	0.261	3.97518e-06	MES_1	cd99l2
2.11859e-10	0.360848	0.952	0.918	5.16513e-06	MES_1	rpl28
2.18662e-10	0.285769	0.322	0.161	5.33098e-06	MES_1	clic1
2.74903e-10	0.343782	0.27	0.126	6.70214e-06	MES_1	dnmt3bb.1
3.84711e-10	0.430572	0.457	0.263	9.37924e-06	MES_1	gadd45ba
3.93019e-10	0.377692	0.348	0.186	9.58181e-06	MES_1	si:dkeyp-120h9.1
4.01189e-10	0.399124	0.257	0.118	9.78099e-06	MES_1	rfx1b
6.2563e-10	0.278206	0.287	0.133	1.52529e-05	MES_1	cdh7a
6.39912e-10	0.576428	0.496	0.327	1.5601e-05	MES_1	cgref1
6.73851e-10	0.32818	0.383	0.208	1.64285e-05	MES_1	prnprs3
7.22706e-10	0.549573	0.683	0.545	1.76196e-05	MES_1	fkbp7
7.45829e-10	0.480115	0.722	0.578	1.81833e-05	MES_1	mibp2
8.06994e-10	0.580091	0.261	0.125	1.96745e-05	MES_1	cthrc1a
9.94778e-10	0.569513	0.648	0.457	2.42527e-05	MES_1	glulb
1.0904e-09	0.454996	0.296	0.151	2.65839e-05	MES_1	anos1b
1.09885e-09	0.445594	0.917	0.845	2.679e-05	MES_1	anxa2a
1.13805e-09	0.418946	0.365	0.205	2.77457e-05	MES_1	slc39a13
1.18555e-09	0.41786	0.391	0.223	2.89037e-05	MES_1	inavab
1.22388e-09	0.383807	0.491	0.308	2.98381e-05	MES_1	psmd7
1.26727e-09	0.569402	0.578	0.407	3.08959e-05	MES_1	gpc6a
1.53845e-09	0.973962	0.326	0.175	3.75075e-05	MES_1	sema3e
1.75085e-09	0.634325	0.574	0.386	4.26857e-05	MES_1	jdp2b
2.15167e-09	0.385238	0.704	0.512	5.24577e-05	MES_1	ppp1r14bb
2.18222e-09	0.533354	0.743	0.585	5.32026e-05	MES_1	cblb
2.25942e-09	0.380928	0.422	0.244	5.50846e-05	MES_1	srgn
2.47608e-09	0.479999	0.565	0.376	6.03668e-05	MES_1	trim8a
2.62638e-09	0.471597	0.357	0.198	6.40311e-05	MES_1	dusp2
2.66761e-09	0.384763	0.535	0.332	6.50363e-05	MES_1	tnfrsf11a
2.73209e-09	0.337894	0.609	0.399	6.66083e-05	MES_1	myo1ea
2.99279e-09	0.444347	0.426	0.26	7.29643e-05	MES_1	rab5if
3.22496e-09	0.301933	0.961	0.942	7.86245e-05	MES_1	rpl32
3.4703e-09	0.343772	0.326	0.169	8.46058e-05	MES_1	mycb
3.73546e-09	0.586754	0.283	0.141	9.10704e-05	MES_1	col14a1a
3.76374e-09	0.393554	0.817	0.702	9.176e-05	MES_1	cox4i1
3.99742e-09	0.328528	0.326	0.172	9.74572e-05	MES_1	sdk2b
4.65847e-09	0.712408	0.683	0.511	0.000113574	MES_1	aspn
5.04645e-09	0.421143	0.57	0.409	0.000123033	MES_1	cct3
5.96573e-09	0.420579	0.448	0.285	0.000145444	MES_1	kpnb3
6.18566e-09	0.612631	0.243	0.12	0.000150806	MES_1	scara3
7.58091e-09	0.379205	0.843	0.775	0.000184823	MES_1	fxyd1
7.74379e-09	0.33301	0.274	0.137	0.000188794	MES_1	marcksl1b
7.96492e-09	0.522159	0.791	0.678	0.000194185	MES_1	ssr2
8.19272e-09	0.377856	0.409	0.247	0.000199739	MES_1	ldha
1.17527e-08	0.389096	0.513	0.337	0.000286532	MES_1	nectin3b
1.40283e-08	0.434664	0.73	0.625	0.000342009	MES_1	atp6v0e1
1.46369e-08	0.264017	0.313	0.167	0.000356848	MES_1	tomm40
1.62153e-08	0.354179	0.874	0.849	0.000395329	MES_1	mt-nd5
1.6785e-08	0.288869	0.97	0.957	0.000409219	MES_1	eef2b
2.00942e-08	0.520987	0.365	0.217	0.000489896	MES_1	pid1
2.02238e-08	0.369812	0.413	0.254	0.000493057	MES_1	letm1
2.13679e-08	0.437193	0.543	0.378	0.000520949	MES_1	tuba8l3
2.29939e-08	0.286784	0.965	0.923	0.000560592	MES_1	rps3
2.40574e-08	0.485079	0.591	0.442	0.000586519	MES_1	npm1a
2.46212e-08	0.366204	0.67	0.509	0.000600265	MES_1	atp5pb
2.67644e-08	0.385246	0.53	0.371	0.000652516	MES_1	cers2b
2.73943e-08	0.40479	0.522	0.357	0.000667872	MES_1	glis2a
2.97661e-08	0.406573	0.674	0.528	0.000725697	MES_1	anxa5b
3.07205e-08	0.299226	0.939	0.931	0.000748967	MES_1	rpl15
3.08839e-08	0.361925	0.874	0.806	0.000752949	MES_1	atp2b4
3.15516e-08	0.337438	0.957	0.932	0.000769228	MES_1	rpl36a
3.43306e-08	0.427868	0.896	0.871	0.000836979	MES_1	ppib
3.52663e-08	0.406083	0.565	0.399	0.000859792	MES_1	krtcap2
4.26521e-08	0.27412	0.283	0.147	0.00103986	MES_1	rtn1a
4.413e-08	0.315861	0.57	0.393	0.00107589	MES_1	psma3
4.80035e-08	0.354823	0.313	0.176	0.00117033	MES_1	ackr4b
4.97665e-08	0.735596	0.809	0.709	0.00121331	MES_1	hbegfa
5.22291e-08	0.346432	0.961	0.948	0.00127335	MES_1	rpl13
5.46806e-08	0.342301	0.583	0.411	0.00133311	MES_1	tgif1
5.61268e-08	0.271301	0.296	0.158	0.00136837	MES_1	slc35e4
5.9725e-08	0.484772	0.591	0.449	0.0014561	MES_1	psmb1
6.48066e-08	0.464829	0.557	0.369	0.00157999	MES_1	ecm1b
7.67205e-08	0.449276	0.222	0.109	0.00187044	MES_1	arid3a
8.83477e-08	0.442798	0.739	0.621	0.00215392	MES_1	eif3ea
8.83596e-08	0.453334	0.378	0.237	0.00215421	MES_1	plk3
8.93021e-08	0.446986	0.422	0.271	0.00217719	MES_1	hivep3b
9.09981e-08	0.619154	0.657	0.493	0.00221853	MES_1	enox2
9.17325e-08	0.335567	0.291	0.153	0.00223644	MES_1	tp53bp2b
9.89495e-08	0.312385	0.417	0.262	0.00241239	MES_1	hspe1
9.96539e-08	1.54956	0.67	0.612	0.00242956	MES_1	tnfaip6
1.00139e-07	0.781171	0.835	0.775	0.00244139	MES_1	krt4
1.01103e-07	0.752037	0.765	0.608	0.0024649	MES_1	c1qtnf5
1.01583e-07	0.299009	0.97	0.945	0.00247659	MES_1	rpl14
1.24108e-07	0.448833	0.2	0.094	0.00302574	MES_1	pcbp4
1.28543e-07	0.355892	0.374	0.226	0.00313387	MES_1	slc6a6b
1.29123e-07	0.318369	0.961	0.917	0.00314801	MES_1	uba52
1.33852e-07	0.262812	0.352	0.206	0.00326331	MES_1	erlin1
1.37586e-07	0.337982	0.983	0.944	0.00335435	MES_1	rpl6
1.37694e-07	0.34781	0.578	0.406	0.00335699	MES_1	clip2
1.4344e-07	0.499855	0.435	0.278	0.00349707	MES_1	llgl1
1.49308e-07	0.548484	0.765	0.63	0.00364013	MES_1	sdc2
1.69184e-07	0.438121	0.261	0.138	0.00412471	MES_1	rhoj
1.78035e-07	0.664114	0.357	0.219	0.0043405	MES_1	hsp70.3
1.79233e-07	0.299619	0.322	0.179	0.00436971	MES_1	phldb2b
1.80134e-07	0.33283	0.583	0.408	0.00439166	MES_1	si:dkeyp-19e1.3
1.90017e-07	0.416201	0.774	0.707	0.00463262	MES_1	atp5f1b
1.98582e-07	0.913553	0.33	0.211	0.00484142	MES_1	pcolce2b
2.14537e-07	0.353154	0.339	0.2	0.00523042	MES_1	tle3b
2.1813e-07	0.335458	0.939	0.918	0.005318	MES_1	rpl7
2.22145e-07	0.311437	0.978	0.942	0.00541591	MES_1	rpsa
2.27962e-07	0.33061	0.474	0.318	0.00555772	MES_1	fkbp2
2.29263e-07	0.396272	0.326	0.188	0.00558943	MES_1	rnf220a
2.29324e-07	0.322122	0.37	0.227	0.00559092	MES_1	tln2a
2.40012e-07	0.998821	0.217	0.11	0.00585148	MES_1	C18H19orf47
2.51518e-07	0.39547	0.343	0.2	0.00613201	MES_1	vat1
2.52086e-07	0.282031	0.239	0.12	0.00614587	MES_1	rnd3b
2.69004e-07	0.358481	0.343	0.201	0.00655833	MES_1	smoc1
3.07701e-07	0.31781	0.991	0.952	0.00750174	MES_1	rpl24
3.08926e-07	0.407068	0.491	0.338	0.00753161	MES_1	itgb5
3.15859e-07	0.38043	0.67	0.517	0.00770065	MES_1	si:dkey-253i9.4
3.18655e-07	0.288475	0.4	0.248	0.0077688	MES_1	snu13b
3.31218e-07	0.361787	0.896	0.84	0.00807509	MES_1	cd63
3.45136e-07	0.34183	0.222	0.113	0.00841441	MES_1	cfap20
3.49228e-07	0.32199	0.939	0.941	0.00851419	MES_1	rpl18
3.7509e-07	0.283677	0.974	0.956	0.00914469	MES_1	rps14
3.94758e-07	0.381524	0.613	0.431	0.0096242	MES_1	hk1
4.22462e-07	0.340691	0.509	0.364	0.0102996	MES_1	CU638870.1
4.30105e-07	0.342837	0.961	0.962	0.010486	MES_1	rplp0
4.34187e-07	0.376816	0.743	0.635	0.0105855	MES_1	gapdhs
4.68777e-07	0.302425	0.952	0.906	0.0114288	MES_1	rpl13a
4.82116e-07	0.335509	0.326	0.189	0.011754	MES_1	tgfbr1a
4.93774e-07	0.330332	0.517	0.351	0.0120382	MES_1	anks1b
5.74467e-07	0.398636	0.678	0.543	0.0140055	MES_1	si:ch211-133n4.4
5.81838e-07	0.335816	0.378	0.236	0.0141852	MES_1	pdlim4
5.83761e-07	0.293602	0.943	0.942	0.0142321	MES_1	rps27a
5.85712e-07	0.274083	0.33	0.195	0.0142797	MES_1	creb5a
6.80104e-07	0.352177	0.7	0.554	0.0165809	MES_1	ddost
6.854e-07	0.437997	0.309	0.185	0.0167101	MES_1	cpn1
6.90152e-07	0.304741	0.5	0.348	0.0168259	MES_1	tuba1b
7.15762e-07	0.312556	0.457	0.307	0.0174503	MES_1	shc1
7.29966e-07	0.309567	0.935	0.93	0.0177966	MES_1	rps5
7.62373e-07	0.32022	0.304	0.177	0.0185867	MES_1	clstn1
7.70487e-07	0.31126	0.883	0.865	0.0187845	MES_1	rpl4
9.39746e-07	0.56152	0.578	0.414	0.022911	MES_1	tgfbr3
9.44955e-07	0.381968	0.617	0.48	0.023038	MES_1	manf
1.02595e-06	0.276487	0.374	0.238	0.0250126	MES_1	psmd8
1.08173e-06	0.283715	0.352	0.214	0.0263727	MES_1	immt
1.08953e-06	0.284811	0.957	0.93	0.0265627	MES_1	rpl35
1.10508e-06	0.358196	0.957	0.951	0.0269418	MES_1	rplp2l
1.1337e-06	0.322868	0.913	0.913	0.0276395	MES_1	rpl21
1.16067e-06	0.406346	0.47	0.316	0.0282971	MES_1	znrf3
1.18088e-06	0.380993	0.913	0.905	0.0287898	MES_1	rps29
1.27628e-06	0.453003	0.383	0.251	0.0311157	MES_1	c1qbp
1.28323e-06	0.266806	0.965	0.944	0.0312852	MES_1	rps3a
1.32244e-06	0.279767	0.426	0.275	0.032241	MES_1	ptp4a3a
1.32965e-06	0.26371	0.4	0.255	0.0324169	MES_1	ENSDARG00000035679
1.33957e-06	0.29315	0.457	0.302	0.0326586	MES_1	marveld1
1.35872e-06	0.297774	0.435	0.296	0.0331256	MES_1	atp5md
1.4046e-06	0.410112	0.23	0.122	0.0342441	MES_1	hsp70l
1.41177e-06	0.311479	0.435	0.292	0.034419	MES_1	rcan1a
1.48827e-06	0.284285	0.348	0.211	0.0362841	MES_1	nop2
1.56417e-06	0.336835	0.509	0.367	0.0381344	MES_1	tcp1
1.67075e-06	0.321407	0.952	0.93	0.040733	MES_1	rpl8
1.6806e-06	0.285072	0.952	0.942	0.0409731	MES_1	rack1
1.72856e-06	0.319539	0.539	0.395	0.0421422	MES_1	npc2
1.89501e-06	0.340005	0.713	0.585	0.0462004	MES_1	nucb2a
1.90901e-06	0.574774	0.243	0.134	0.0465417	MES_1	hsp70.2
1.91796e-06	0.287854	0.4	0.26	0.0467598	MES_1	atp5if1a
1.96138e-06	0.284756	0.517	0.375	0.0478184	MES_1	ola1
1.97752e-06	0.508651	0.283	0.172	0.048212	MES_1	moxd1
1.97879e-06	0.382051	0.743	0.636	0.048243	MES_1	ssr4
1.99396e-06	0.374482	0.2	0.104	0.0486127	MES_1	itga3a
2.02389e-06	0.367848	0.526	0.38	0.0493424	MES_1	nap1l1
8.20022e-207	2.29131	0.813	0.212	1.99921e-202	MES_2	sdk2a
3.78696e-158	2.37883	0.876	0.363	9.2326e-154	MES_2	runx2a
6.48633e-135	1.88477	0.661	0.19	1.58137e-130	MES_2	scube3
1.06987e-119	0.975202	0.404	0.06	2.60835e-115	MES_2	fibina
2.10962e-115	1.48178	0.51	0.112	5.14326e-111	MES_2	gpc5c
4.79491e-115	1.33317	0.679	0.186	1.169e-110	MES_2	ncam1a
5.43772e-115	1.74197	0.852	0.435	1.32571e-110	MES_2	efnb3b
5.13015e-111	1.54203	0.957	0.625	1.25073e-106	MES_2	ptprfb
1.66428e-108	1.61074	0.728	0.274	4.05751e-104	MES_2	fgl1
6.34042e-101	0.903913	0.757	0.226	1.54579e-96	MES_2	cdh11
3.3724e-97	1.03096	0.463	0.103	8.22192e-93	MES_2	cdh7a
1.25028e-85	1.43683	0.521	0.156	3.04819e-81	MES_2	rnf220a
1.37804e-81	1.2463	0.76	0.377	3.35967e-77	MES_2	si:dkeyp-19e1.3
1.48736e-81	0.877315	0.355	0.072	3.62619e-77	MES_2	zgc:113307
1.20076e-80	1.00231	0.564	0.178	2.92746e-76	MES_2	fpr1
3.3293e-76	0.664728	0.288	0.049	8.11684e-72	MES_2	pcdh12
2.13745e-75	1.2476	0.798	0.419	5.2111e-71	MES_2	CR936442.1
6.45788e-71	1.31629	0.834	0.516	1.57443e-66	MES_2	bach2b
3.61032e-70	1.36473	0.762	0.411	8.80197e-66	MES_2	nav3
2.18685e-65	0.907328	0.647	0.264	5.33153e-61	MES_2	pth1r
8.50015e-64	1.13456	0.521	0.203	2.07234e-59	MES_2	robo2.1
1.00709e-63	1.03679	0.903	0.728	2.45529e-59	MES_2	calm3a
9.03476e-61	0.748521	0.22	0.034	2.20267e-56	MES_2	grem2b
1.54113e-60	0.969717	0.937	0.684	3.75726e-56	MES_2	dkk3b
9.88356e-57	0.707529	0.333	0.087	2.40961e-52	MES_2	ELAPOR2.1
4.63659e-56	1.37661	0.501	0.2	1.1304e-51	MES_2	sox6
6.5703e-56	1.06324	0.427	0.146	1.60184e-51	MES_2	pdgfc
6.2562e-53	1.02176	0.663	0.368	1.52526e-48	MES_2	supt3h
4.29849e-52	0.995591	0.308	0.081	1.04797e-47	MES_2	matn4
5.10149e-52	0.769818	0.49	0.189	1.24374e-47	MES_2	s1pr5a
7.94854e-51	0.948883	0.256	0.058	1.93785e-46	MES_2	ngfra
3.99633e-49	0.880385	0.593	0.298	9.74305e-45	MES_2	tnfrsf21
6.48645e-49	1.0107	0.91	0.692	1.5814e-44	MES_2	robo1
6.09257e-48	0.943292	0.874	0.619	1.48537e-43	MES_2	myo10l3
1.14152e-47	0.707631	0.243	0.055	2.78302e-43	MES_2	si:ch211-202p1.5
4.0555e-46	0.917451	0.629	0.337	9.88732e-42	MES_2	samd11
4.86933e-46	0.550267	0.771	0.468	1.18714e-41	MES_2	si:dkey-12l12.1
5.81967e-45	0.790135	0.443	0.171	1.41884e-40	MES_2	CABZ01056843.1
6.78546e-45	0.915329	0.811	0.559	1.6543e-40	MES_2	cbfb
1.89527e-44	0.946184	0.582	0.286	4.62068e-40	MES_2	runx2b
5.14906e-42	1.10829	0.784	0.487	1.25534e-37	MES_2	vcana
1.78206e-40	0.767048	0.398	0.154	4.34467e-36	MES_2	sdk2b
2.77591e-40	0.711038	0.254	0.067	6.76768e-36	MES_2	fam189a1
1.3037e-38	0.944638	0.676	0.418	3.17842e-34	MES_2	dgkh
1.68827e-38	0.963552	0.724	0.496	4.11601e-34	MES_2	zgc:154058
1.84158e-38	0.635231	0.339	0.118	4.48978e-34	MES_2	zeb2a
2.47778e-38	0.728953	0.227	0.057	6.04083e-34	MES_2	ntrk3a
5.22116e-38	0.792189	0.213	0.052	1.27292e-33	MES_2	sema6ba
1.20195e-37	0.67673	0.384	0.152	2.93035e-33	MES_2	wnt10a
5.29102e-37	0.686699	0.4	0.156	1.28995e-32	MES_2	mef2cb
9.98814e-37	0.83419	0.578	0.309	2.43511e-32	MES_2	twist2
1.04975e-36	0.717071	0.225	0.059	2.55928e-32	MES_2	syt7b
1.33681e-36	0.652428	0.939	0.816	3.25913e-32	MES_2	col16a1
2.53419e-36	0.598885	0.501	0.243	6.17835e-32	MES_2	cd99l2
4.97909e-36	0.638362	0.966	0.763	1.2139e-31	MES_2	col11a1b
5.11593e-36	0.472684	0.308	0.102	1.24726e-31	MES_2	efnb2b
5.96823e-35	0.757749	0.539	0.292	1.45506e-30	MES_2	nab1b
1.17092e-34	0.860196	0.793	0.56	2.8547e-30	MES_2	enpp1
2.58739e-34	0.519	0.213	0.056	6.30806e-30	MES_2	si:dkey-121b10.7
5.30703e-34	0.477223	0.996	0.93	1.29385e-29	MES_2	col1a1b
1.07365e-33	0.672278	0.613	0.342	2.61756e-29	MES_2	fgfr3
2.41194e-33	0.458668	0.996	0.942	5.88032e-29	MES_2	col12a1a
4.34674e-32	0.743492	0.578	0.337	1.05974e-27	MES_2	sash1b
1.46775e-31	0.648105	0.942	0.815	3.57838e-27	MES_2	antxr2a
4.11719e-31	0.786669	0.654	0.421	1.00377e-26	MES_2	CU639469.1
7.94824e-31	0.71265	0.948	0.817	1.93778e-26	MES_2	cux1a
1.01966e-30	0.786039	0.53	0.301	2.48594e-26	MES_2	efnb1
1.25586e-30	0.522904	0.254	0.084	3.0618e-26	MES_2	gng2
1.75924e-30	0.589374	0.288	0.105	4.28903e-26	MES_2	sytl3
2.1188e-30	0.868037	0.744	0.547	5.16563e-26	MES_2	col27a1b
4.0494e-30	1.02655	0.407	0.197	9.87244e-26	MES_2	epha3
6.02952e-30	0.81754	0.688	0.479	1.47e-25	MES_2	dcbld1
7.35267e-30	0.509458	0.312	0.118	1.79258e-25	MES_2	si:ch211-210g13.5
8.35681e-30	0.944477	0.398	0.187	2.03739e-25	MES_2	inhbab
9.59235e-30	0.502571	0.303	0.115	2.33861e-25	MES_2	pald1b
1.79402e-29	0.646663	0.512	0.285	4.37382e-25	MES_2	si:ch211-136a13.1
4.43316e-29	0.628217	0.71	0.497	1.0808e-24	MES_2	cdk17
4.91685e-29	0.612901	0.753	0.498	1.19873e-24	MES_2	si:busm1-57f23.1
6.14906e-29	0.717371	0.557	0.312	1.49914e-24	MES_2	pear1
9.73259e-29	0.402233	0.2	0.058	2.37281e-24	MES_2	cyb5r4
2.67493e-28	0.753414	0.611	0.398	6.52149e-24	MES_2	ABR
4.42934e-28	0.655395	0.308	0.124	1.07987e-23	MES_2	ptch2
1.07583e-27	1.20569	0.447	0.228	2.62287e-23	MES_2	mmp9
3.73396e-27	0.647274	0.387	0.185	9.1034e-23	MES_2	stox1
8.10152e-27	0.667824	0.407	0.199	1.97515e-22	MES_2	ripor1
1.08655e-26	0.630809	0.816	0.647	2.649e-22	MES_2	rhbdf1a
1.36673e-26	0.735564	0.519	0.295	3.33208e-22	MES_2	klf7a
1.73104e-26	0.755536	0.375	0.179	4.22027e-22	MES_2	CU862078.1
2.56074e-26	0.665501	0.362	0.169	6.24309e-22	MES_2	ripor2
4.54272e-25	0.642824	0.733	0.536	1.10751e-20	MES_2	aebp1
5.08043e-24	0.620651	0.872	0.742	1.23861e-19	MES_2	pdgfrb
7.70658e-24	0.610605	0.546	0.333	1.87886e-19	MES_2	oafa
1.53983e-23	0.511681	0.769	0.555	3.7541e-19	MES_2	edil3a
2.76579e-23	0.739218	0.227	0.083	6.74299e-19	MES_2	ctnna2
3.0188e-23	0.422442	0.279	0.116	7.35984e-19	MES_2	gtdc1
3.22787e-23	0.635575	0.267	0.108	7.86956e-19	MES_2	mmp11b
9.05786e-23	0.277547	1	0.949	2.20831e-18	MES_2	col1a2
9.4139e-23	0.633609	0.438	0.243	2.29511e-18	MES_2	adgrl2a
1.37475e-22	0.647438	0.672	0.478	3.35164e-18	MES_2	dennd2b
4.73043e-22	0.452687	0.337	0.157	1.15328e-17	MES_2	sema4bb
5.10721e-22	0.574465	0.236	0.093	1.24514e-17	MES_2	hyal4
6.64026e-22	0.328936	0.225	0.081	1.61889e-17	MES_2	sgcg
2.47417e-21	0.534648	0.587	0.383	6.03202e-17	MES_2	triob
3.57753e-21	0.426181	0.247	0.101	8.72201e-17	MES_2	mgat4b
4.92395e-21	0.583953	0.463	0.273	1.20046e-16	MES_2	mef2ca
5.78887e-21	0.550932	0.726	0.55	1.41133e-16	MES_2	sipa1l3
1.09221e-20	0.737952	0.254	0.103	2.66281e-16	MES_2	adgrv1
1.10306e-20	0.523541	0.22	0.085	2.68926e-16	MES_2	BX957317.2
2.60198e-20	0.49339	0.849	0.742	6.34363e-16	MES_2	furina
2.68272e-20	0.6003	0.488	0.305	6.54048e-16	MES_2	cacnb2a
3.03927e-20	0.312005	1	0.986	7.40974e-16	MES_2	rplp1
3.13203e-20	0.630625	0.627	0.424	7.63589e-16	MES_2	inhbaa
7.22377e-20	0.521545	0.845	0.694	1.76115e-15	MES_2	qkia
8.23817e-20	0.369521	0.98	0.895	2.00846e-15	MES_2	pabpc1a
1.02448e-19	0.492046	0.47	0.276	2.49768e-15	MES_2	si:ch211-197l9.2
1.22345e-19	0.494125	0.342	0.173	2.98276e-15	MES_2	twist3
1.9317e-19	0.654167	0.865	0.755	4.70948e-15	MES_2	sema6e
1.99787e-19	0.46836	0.701	0.516	4.8708e-15	MES_2	sall1a
3.06852e-19	0.531667	0.373	0.205	7.48104e-15	MES_2	lrrfip1a
5.23869e-19	0.448842	0.51	0.311	1.27719e-14	MES_2	ghrb
5.65882e-19	0.326749	0.957	0.674	1.37962e-14	MES_2	tnc
8.73126e-19	0.376576	0.308	0.151	2.12868e-14	MES_2	si:ch211-37e10.2
1.36445e-18	0.531911	0.454	0.272	3.32654e-14	MES_2	FRMD4A
1.72838e-18	0.4519	0.474	0.279	4.2138e-14	MES_2	arhgap24
2.36345e-18	0.494162	0.297	0.145	5.76209e-14	MES_2	cdk6
3.98809e-18	0.65962	0.604	0.431	9.72296e-14	MES_2	lamb1a
5.38561e-18	0.407404	0.953	0.894	1.31301e-13	MES_2	jmjd1cb
8.42117e-18	0.529439	0.676	0.49	2.05308e-13	MES_2	chst11
8.50025e-18	0.718885	0.521	0.342	2.07236e-13	MES_2	rbfox3a
1.09601e-17	0.45564	0.755	0.603	2.67208e-13	MES_2	fgfr1a
1.22164e-17	0.425284	0.373	0.21	2.97836e-13	MES_2	lrrc8c
1.28757e-17	0.575621	0.591	0.429	3.13909e-13	MES_2	MYO9B
1.81395e-17	1.5123	0.494	0.328	4.42241e-13	MES_2	cntfr
1.90312e-17	0.378238	0.919	0.807	4.63981e-13	MES_2	ndufa4l
2.01217e-17	0.481958	0.829	0.677	4.90568e-13	MES_2	hmcn2.1
2.44557e-17	0.357225	0.283	0.135	5.96229e-13	MES_2	cspg5a
2.77442e-17	0.302119	0.987	0.947	6.76404e-13	MES_2	rplp2l
2.82253e-17	0.450692	0.344	0.184	6.88132e-13	MES_2	rgmb
3.86039e-17	0.479303	0.326	0.168	9.41164e-13	MES_2	lzts2b
8.20196e-17	0.407073	0.953	0.863	1.99964e-12	MES_2	mmp14a
1.00907e-16	0.475975	0.398	0.23	2.46011e-12	MES_2	mllt3
1.16698e-16	0.486311	0.613	0.441	2.8451e-12	MES_2	C18H15orf48
1.41096e-16	0.473415	0.346	0.191	3.43991e-12	MES_2	crip2
1.49921e-16	0.309642	0.989	0.954	3.65507e-12	MES_2	hsp90ab1
1.49925e-16	0.628254	0.369	0.212	3.65518e-12	MES_2	sulf1
2.49999e-16	0.366799	0.778	0.624	6.09498e-12	MES_2	tcf12
3.20136e-16	0.44434	0.348	0.193	7.80492e-12	MES_2	zmp:0000000936
3.44384e-16	0.662114	0.744	0.585	8.39609e-12	MES_2	plxna3
3.73201e-16	0.577031	0.454	0.289	9.09865e-12	MES_2	lamc3
4.28922e-16	0.391034	0.483	0.3	1.04571e-11	MES_2	stk17al
4.47294e-16	0.494452	0.575	0.385	1.0905e-11	MES_2	cacna1c
5.40571e-16	0.453765	0.317	0.168	1.31791e-11	MES_2	clstn1
6.46488e-16	0.58866	0.465	0.304	1.57614e-11	MES_2	gli1
8.79807e-16	0.47057	0.64	0.468	2.14497e-11	MES_2	si:dkey-246i14.3
1.51582e-15	0.554335	0.488	0.326	3.69557e-11	MES_2	ndrg3b
2.54658e-15	0.402962	0.622	0.443	6.20857e-11	MES_2	snrpb
2.60894e-15	0.360467	0.627	0.463	6.3606e-11	MES_2	rasgef1bb
2.89431e-15	0.462151	0.353	0.2	7.05633e-11	MES_2	cacna2d1a
3.06767e-15	0.55789	0.44	0.28	7.47899e-11	MES_2	asap2a
3.93474e-15	0.417366	0.784	0.635	9.5929e-11	MES_2	hyou1
4.3478e-15	0.426533	0.87	0.753	1.05999e-10	MES_2	igf1rb
4.9787e-15	0.382103	0.89	0.755	1.21381e-10	MES_2	si:ch211-222l21.1
5.95355e-15	0.416297	0.227	0.106	1.45148e-10	MES_2	CABZ01043952.1
6.24119e-15	0.345324	0.825	0.659	1.5216e-10	MES_2	cox6a1
6.48979e-15	0.350889	0.701	0.556	1.58221e-10	MES_2	slc20a1b
8.80721e-15	0.322656	0.888	0.751	2.1472e-10	MES_2	khdrbs1a
1.77146e-14	0.299097	0.755	0.6	4.31882e-10	MES_2	tenm3
2.52378e-14	0.320956	0.209	0.095	6.15297e-10	MES_2	tlcd5a
2.68248e-14	0.457755	0.225	0.107	6.53988e-10	MES_2	fgf10b
2.72763e-14	0.351888	0.227	0.106	6.64995e-10	MES_2	prelp
2.93873e-14	0.634695	0.562	0.427	7.16463e-10	MES_2	kdm6bb
3.09389e-14	0.421042	0.557	0.398	7.5429e-10	MES_2	clip2
3.18573e-14	0.362425	0.499	0.325	7.7668e-10	MES_2	tnfrsf11a
7.54512e-14	0.323343	0.294	0.158	1.8395e-09	MES_2	SEMA4F
7.65453e-14	0.378858	0.344	0.193	1.86617e-09	MES_2	hpse2
7.89955e-14	0.351293	0.294	0.157	1.92591e-09	MES_2	CR391940.1
8.36671e-14	0.356175	0.29	0.155	2.0398e-09	MES_2	mapkapk3
8.52766e-14	0.34411	0.351	0.206	2.07904e-09	MES_2	plxna4
9.24478e-14	0.443483	0.831	0.715	2.25388e-09	MES_2	myofl
9.76832e-14	0.343364	0.362	0.217	2.38152e-09	MES_2	pcnt
1.02839e-13	0.437998	0.928	0.839	2.50722e-09	MES_2	neo1a
1.57198e-13	0.388345	0.692	0.548	3.83249e-09	MES_2	ptbp1b
1.89766e-13	0.366605	0.274	0.146	4.6265e-09	MES_2	rnf165a
2.60143e-13	0.494966	0.539	0.381	6.34228e-09	MES_2	parga
3.23894e-13	0.35968	0.393	0.241	7.89654e-09	MES_2	tmem119b
3.74023e-13	0.456394	0.706	0.565	9.11868e-09	MES_2	prkcaa
4.48243e-13	0.330993	0.229	0.112	1.09282e-08	MES_2	runx1t1
7.13811e-13	0.425568	0.636	0.46	1.74027e-08	MES_2	daam1b
7.89833e-13	0.423356	0.429	0.288	1.92561e-08	MES_2	ubald2
8.77337e-13	0.297566	0.301	0.17	2.13895e-08	MES_2	ankib1a
9.39924e-13	0.366407	0.481	0.319	2.29154e-08	MES_2	efna5a
1.00498e-12	0.467986	0.461	0.31	2.45014e-08	MES_2	thrab
1.0728e-12	0.277921	0.964	0.89	2.6155e-08	MES_2	ybx1
1.09051e-12	0.443887	0.501	0.366	2.65866e-08	MES_2	ppp3cca
1.22216e-12	0.394932	0.458	0.302	2.97964e-08	MES_2	tmtc2b
1.24499e-12	0.385652	0.449	0.294	3.0353e-08	MES_2	slc6a8
1.26644e-12	0.430782	0.746	0.604	3.08758e-08	MES_2	cpe
1.67488e-12	0.254763	0.984	0.971	4.08337e-08	MES_2	rpl7a
1.86464e-12	0.250719	0.993	0.958	4.546e-08	MES_2	rplp0
2.31214e-12	0.389064	0.764	0.635	5.637e-08	MES_2	tanc2a
2.31276e-12	0.560534	0.827	0.705	5.63852e-08	MES_2	msi2b
2.39044e-12	0.4441	0.38	0.242	5.82789e-08	MES_2	lbr
2.82749e-12	0.418635	0.618	0.476	6.89342e-08	MES_2	rerea
3.15124e-12	0.458268	0.542	0.388	7.68272e-08	MES_2	plxna1a
3.4218e-12	0.428546	0.31	0.182	8.34235e-08	MES_2	glcci1a
4.11129e-12	0.265304	0.973	0.921	1.00233e-07	MES_2	rpl11
4.69653e-12	0.333708	0.371	0.225	1.14501e-07	MES_2	nid1b
4.99974e-12	0.329518	0.888	0.8	1.21894e-07	MES_2	atp2b4
5.66975e-12	0.376989	0.566	0.419	1.38228e-07	MES_2	hspd1
6.0102e-12	0.334242	0.8	0.66	1.46529e-07	MES_2	FP102018.1
6.20488e-12	0.353637	0.744	0.588	1.51275e-07	MES_2	lum
7.19729e-12	0.301413	0.481	0.329	1.7547e-07	MES_2	pak1
7.7046e-12	0.339746	0.249	0.134	1.87838e-07	MES_2	si:dkey-188h10.3
7.93061e-12	0.339764	0.503	0.353	1.93348e-07	MES_2	ubald1a
8.5465e-12	0.358675	0.746	0.598	2.08364e-07	MES_2	calr
9.20325e-12	1.66522	0.434	0.344	2.24375e-07	MES_2	spon1b
9.66976e-12	0.466642	0.528	0.393	2.35749e-07	MES_2	epha2b
1.04831e-11	0.347861	0.29	0.166	2.55577e-07	MES_2	hpse
1.05772e-11	0.321734	0.562	0.414	2.57871e-07	MES_2	si:ch211-178n15.1
1.40268e-11	0.439709	0.661	0.51	3.41974e-07	MES_2	baiap2a
1.41171e-11	0.515604	0.402	0.265	3.44176e-07	MES_2	ddc
1.65762e-11	0.418063	0.218	0.112	4.04129e-07	MES_2	klhl23
2.56767e-11	0.469127	0.688	0.57	6.25999e-07	MES_2	tshz2
2.61637e-11	0.361061	0.272	0.156	6.37871e-07	MES_2	kctd7
2.84575e-11	0.361374	0.679	0.545	6.93794e-07	MES_2	cd276
3.01658e-11	0.358138	0.712	0.58	7.35442e-07	MES_2	cblb
3.14413e-11	0.255529	0.975	0.914	7.66539e-07	MES_2	rps27.1
3.30623e-11	0.368532	0.831	0.755	8.06059e-07	MES_2	dock1
4.42627e-11	0.329668	0.31	0.192	1.07912e-06	MES_2	lpar6a
4.8321e-11	0.315091	0.299	0.178	1.17807e-06	MES_2	sept5a
4.9433e-11	0.3875	0.569	0.448	1.20518e-06	MES_2	si:dkey-286j15.1
5.86526e-11	0.298317	0.243	0.133	1.42995e-06	MES_2	adam15
5.86885e-11	0.321633	0.587	0.441	1.43083e-06	MES_2	mcf2l2
7.21527e-11	0.511529	0.342	0.221	1.75908e-06	MES_2	slc6a6b
7.74064e-11	0.377778	0.512	0.386	1.88717e-06	MES_2	plxnb2a.1
8.76118e-11	0.391964	0.369	0.241	2.13598e-06	MES_2	ano6
9.77278e-11	0.3311	0.2	0.102	2.3826e-06	MES_2	CT573344.1
1.08306e-10	0.305888	0.551	0.404	2.64049e-06	MES_2	cnot6a
1.09861e-10	0.402923	0.573	0.446	2.6784e-06	MES_2	nr3c1
1.10877e-10	0.352475	0.497	0.365	2.70318e-06	MES_2	pkd1a
1.18637e-10	0.304751	0.387	0.254	2.89237e-06	MES_2	acacb
1.28598e-10	0.314718	0.728	0.616	3.13522e-06	MES_2	eif3ea
1.30528e-10	0.410426	0.688	0.564	3.18228e-06	MES_2	tbl1xr1a
1.86988e-10	0.333375	0.508	0.367	4.55878e-06	MES_2	mxi1
2.06299e-10	0.334065	0.569	0.436	5.02958e-06	MES_2	sox4a
2.41995e-10	0.346111	0.366	0.24	5.89984e-06	MES_2	hs6st1b
2.61641e-10	0.337233	0.31	0.19	6.3788e-06	MES_2	inppl1b
2.76207e-10	0.338336	0.375	0.24	6.73393e-06	MES_2	arvcfb
2.97819e-10	0.56257	0.569	0.441	7.26082e-06	MES_2	fbrsl1
3.06268e-10	0.535718	0.434	0.319	7.46681e-06	MES_2	alcama
3.16794e-10	0.358595	0.292	0.173	7.72345e-06	MES_2	csf1ra
3.39082e-10	0.342807	0.267	0.156	8.26682e-06	MES_2	ccdc102a
4.29502e-10	0.387534	0.445	0.305	1.04713e-05	MES_2	tnnt3b
4.37185e-10	0.351363	0.373	0.251	1.06586e-05	MES_2	puf60a
4.40506e-10	0.271749	0.256	0.145	1.07395e-05	MES_2	slc17a6b
4.66967e-10	0.316593	0.679	0.546	1.13847e-05	MES_2	h2az2b
4.73475e-10	0.315392	0.962	0.871	1.15433e-05	MES_2	hspa5
4.73942e-10	0.408296	0.272	0.163	1.15547e-05	MES_2	smc4
4.7621e-10	0.378458	0.564	0.437	1.161e-05	MES_2	hmga1a
4.92053e-10	0.305163	0.782	0.649	1.19963e-05	MES_2	epha2a
5.22819e-10	0.306002	0.348	0.226	1.27463e-05	MES_2	ldb1a
5.4644e-10	0.318774	0.742	0.64	1.33222e-05	MES_2	cert1b
6.15055e-10	0.33558	0.555	0.428	1.4995e-05	MES_2	tcf3b
6.82278e-10	0.345469	0.663	0.531	1.66339e-05	MES_2	zgc:92242
7.05503e-10	0.340595	0.582	0.453	1.72002e-05	MES_2	fam168a
7.674e-10	0.431103	0.53	0.408	1.87092e-05	MES_2	tfe3a
7.69201e-10	0.304875	0.652	0.525	1.87531e-05	MES_2	ano5b
7.95164e-10	0.319924	0.337	0.204	1.93861e-05	MES_2	znf536
8.0139e-10	0.384767	0.67	0.537	1.95379e-05	MES_2	hmgn2
9.41899e-10	0.273285	0.838	0.727	2.29635e-05	MES_2	lifrb
1.01362e-09	0.34566	0.739	0.622	2.47121e-05	MES_2	actn1
1.20034e-09	0.251693	0.22	0.121	2.92642e-05	MES_2	rnf44
1.3557e-09	0.301855	0.454	0.317	3.3052e-05	MES_2	kif26ab
1.37239e-09	0.34421	0.613	0.478	3.34589e-05	MES_2	nop56
1.37405e-09	0.26345	0.831	0.7	3.34994e-05	MES_2	cfl1
1.38523e-09	0.254056	0.616	0.474	3.37719e-05	MES_2	si:ch211-183d21.1
1.51861e-09	0.483452	0.389	0.268	3.70238e-05	MES_2	ctnnd2a
1.6677e-09	0.298091	0.243	0.137	4.06586e-05	MES_2	has1
1.69834e-09	0.276627	0.834	0.696	4.14055e-05	MES_2	atp5f1b
1.71482e-09	0.51676	0.297	0.185	4.18074e-05	MES_2	diaph3
1.87786e-09	0.28888	0.901	0.747	4.57822e-05	MES_2	hsp90b1
1.96864e-09	0.304895	0.782	0.663	4.79954e-05	MES_2	marcksl1a
2.01485e-09	0.267226	0.822	0.695	4.91221e-05	MES_2	cox4i1
2.15105e-09	0.365231	0.697	0.565	5.24426e-05	MES_2	bahcc1a
2.34062e-09	0.277083	0.982	0.957	5.70644e-05	MES_2	cd81a
2.49147e-09	0.298284	0.676	0.533	6.07421e-05	MES_2	sema6dl
2.54242e-09	0.346099	0.281	0.171	6.19842e-05	MES_2	nkain4
2.82328e-09	0.450084	0.216	0.12	6.88314e-05	MES_2	cenpf
2.83457e-09	0.268197	0.443	0.298	6.91068e-05	MES_2	ntd5
3.14471e-09	0.301849	0.375	0.253	7.66681e-05	MES_2	bcl11ba
3.268e-09	0.297526	0.508	0.382	7.96738e-05	MES_2	smarca4a
3.39592e-09	0.364814	0.535	0.414	8.27926e-05	MES_2	slc38a5a
3.4748e-09	0.438262	0.387	0.269	8.47156e-05	MES_2	lhx2b
3.85837e-09	0.352537	0.84	0.757	9.4067e-05	MES_2	baz2ba
3.88211e-09	0.326458	0.544	0.415	9.46459e-05	MES_2	si:ch211-288g17.3
4.04908e-09	0.316411	0.348	0.231	9.87165e-05	MES_2	BX322574.1
4.45646e-09	0.306339	0.294	0.183	0.000108649	MES_2	fto
4.58622e-09	0.313407	0.299	0.188	0.000111812	MES_2	ANKFN1
4.97758e-09	0.308792	0.461	0.334	0.000121353	MES_2	nectin3b
5.71369e-09	0.339052	0.393	0.275	0.0001393	MES_2	lrrc8db
5.91364e-09	0.279393	0.409	0.288	0.000144175	MES_2	hbs1l
5.9457e-09	0.322039	0.93	0.869	0.000144956	MES_2	hdac4
8.40869e-09	0.289851	0.281	0.174	0.000205004	MES_2	stox2b
9.1349e-09	0.267989	0.227	0.13	0.000222709	MES_2	ngfb
9.36308e-09	0.453428	0.645	0.529	0.000228272	MES_2	si:ch211-263k4.2
9.50107e-09	0.340669	0.481	0.362	0.000231636	MES_2	plekhh1
1.03478e-08	0.31898	0.555	0.427	0.00025228	MES_2	zdhhc8b
1.06503e-08	0.285856	0.636	0.507	0.000259654	MES_2	ptprsa.1
1.08829e-08	0.26746	0.935	0.831	0.000265325	MES_2	eef1b2
1.09774e-08	0.250291	0.483	0.359	0.00026763	MES_2	rgl1
1.1127e-08	0.575302	0.285	0.187	0.000271276	MES_2	si:dkey-34d22.1
1.11879e-08	0.298574	0.492	0.373	0.000272762	MES_2	sem1
1.12473e-08	0.257934	0.216	0.122	0.000274208	MES_2	chd5
1.23662e-08	0.259837	0.822	0.74	0.000301487	MES_2	ankrd11
1.41968e-08	0.262323	0.245	0.145	0.000346117	MES_2	znf281a
1.44824e-08	0.296655	0.73	0.624	0.000353082	MES_2	bcl2l11
1.47568e-08	0.329876	0.582	0.472	0.000359771	MES_2	cct2.1
1.47942e-08	0.332193	0.521	0.41	0.000360683	MES_2	adka
1.6054e-08	0.30254	0.544	0.436	0.000391396	MES_2	elk3
1.65474e-08	0.286686	0.335	0.224	0.000403426	MES_2	zcchc7
1.87393e-08	0.302408	0.512	0.398	0.000456864	MES_2	cox7a2a
1.88586e-08	0.358032	0.665	0.587	0.000459773	MES_2	gpc4
2.01872e-08	0.286387	0.62	0.491	0.000492163	MES_2	sipa1l2
2.08092e-08	0.252005	0.652	0.543	0.000507328	MES_2	ssh2a
2.14712e-08	0.254768	0.708	0.591	0.000523467	MES_2	hnrnpaba
2.17217e-08	0.302838	0.618	0.505	0.000529575	MES_2	tubb5
2.18918e-08	0.315625	0.638	0.525	0.000533722	MES_2	rin2
2.38364e-08	0.310074	0.371	0.262	0.000581132	MES_2	smarcd1
2.82311e-08	0.305516	0.456	0.34	0.000688275	MES_2	emp2
2.97876e-08	0.286507	0.418	0.296	0.000726221	MES_2	arhgef40
3.09889e-08	0.275743	0.328	0.219	0.000755508	MES_2	noc2l
3.29806e-08	0.289573	0.27	0.173	0.000804066	MES_2	zgc:91890
3.36403e-08	0.273426	0.249	0.151	0.00082015	MES_2	runx3
3.4438e-08	0.332824	0.755	0.663	0.0008396	MES_2	igf1ra
3.76218e-08	0.342318	0.524	0.406	0.000917219	MES_2	hmgb2b
4.00768e-08	0.29117	0.73	0.624	0.000977072	MES_2	fam214a
4.0711e-08	0.271852	0.631	0.488	0.000992533	MES_2	lsp1b
4.55344e-08	0.330773	0.258	0.165	0.00111013	MES_2	ftr67
4.8921e-08	0.279706	0.719	0.63	0.00119269	MES_2	afdna
5.52275e-08	0.253889	0.733	0.602	0.00134645	MES_2	rnf10
5.59917e-08	0.309327	0.499	0.375	0.00136508	MES_2	klf7b
6.1737e-08	0.288013	0.551	0.429	0.00150515	MES_2	lin28b
6.3419e-08	0.279902	0.283	0.185	0.00154616	MES_2	CABZ01031868.1
6.82764e-08	0.294342	0.285	0.187	0.00166458	MES_2	phc2a
7.85678e-08	0.409522	0.422	0.313	0.00191548	MES_2	ptch1
8.9198e-08	0.258282	0.629	0.515	0.00217465	MES_2	top2b
1.01194e-07	0.25548	0.27	0.17	0.0024671	MES_2	apbb2b
1.08851e-07	0.303817	0.526	0.408	0.00265379	MES_2	peli1b
1.09963e-07	0.252623	0.629	0.523	0.00268091	MES_2	znf609b
1.24294e-07	0.335567	0.213	0.127	0.00303029	MES_2	rrm2.1
1.35683e-07	0.462098	0.748	0.656	0.00330794	MES_2	adarb1b
1.35828e-07	0.300257	0.807	0.727	0.00331148	MES_2	grb10b
1.40956e-07	0.287378	0.461	0.355	0.0034365	MES_2	ganab
1.46483e-07	0.280844	0.335	0.231	0.00357126	MES_2	sept9b
1.53839e-07	0.258894	0.425	0.309	0.00375061	MES_2	atxn2l
1.53957e-07	0.258734	0.852	0.769	0.00375347	MES_2	rarga
1.65449e-07	0.333021	0.438	0.329	0.00403364	MES_2	frmpd1b
1.68791e-07	0.262774	0.719	0.616	0.00411513	MES_2	mbnl1
1.70208e-07	0.323187	0.488	0.378	0.00414968	MES_2	CABZ01044099.1
1.70226e-07	0.27095	0.584	0.468	0.00415011	MES_2	ext1a
1.76124e-07	0.292968	0.225	0.134	0.00429389	MES_2	lrrc4ca
1.7693e-07	0.315347	0.213	0.128	0.00431355	MES_2	ANO7
1.81895e-07	0.297866	0.317	0.217	0.0044346	MES_2	nkd1
1.84327e-07	0.250154	0.521	0.41	0.0044939	MES_2	eif3ha
1.92652e-07	0.256823	0.234	0.146	0.00469685	MES_2	dph1
2.09084e-07	0.314179	0.506	0.396	0.00509747	MES_2	fmnl2a
2.15391e-07	0.262274	0.62	0.517	0.00525124	MES_2	thoc2
2.20436e-07	0.264919	0.317	0.216	0.00537423	MES_2	suclg2
2.53378e-07	0.250779	0.508	0.395	0.00617736	MES_2	uggt2
2.603e-07	0.252227	0.712	0.61	0.0063461	MES_2	chd9
2.73391e-07	0.26285	0.348	0.243	0.00666526	MES_2	ssh2b
2.75413e-07	0.25496	0.476	0.369	0.00671458	MES_2	rgs12a
2.79636e-07	0.342209	0.863	0.779	0.00681753	MES_2	agrn
2.92539e-07	0.290061	0.58	0.468	0.00713211	MES_2	brf1a
3.00686e-07	0.284197	0.422	0.319	0.00733072	MES_2	scpep1
3.03074e-07	0.289579	0.528	0.427	0.00738894	MES_2	vaspb
3.17245e-07	0.295988	0.634	0.533	0.00773443	MES_2	xpr1b
3.30693e-07	0.353273	0.396	0.299	0.0080623	MES_2	phgdh
3.33077e-07	0.43263	0.476	0.363	0.00812043	MES_2	p3h2
3.44835e-07	0.266057	0.618	0.513	0.00840707	MES_2	abcf1
3.84589e-07	0.275298	0.528	0.412	0.00937629	MES_2	her9
4.22168e-07	0.391697	0.362	0.268	0.0102925	MES_2	ptprea
4.68219e-07	0.320134	0.409	0.31	0.0114152	MES_2	cc2d1b
4.84196e-07	0.329554	0.652	0.539	0.0118047	MES_2	si:ch211-133n4.4
5.13431e-07	0.265848	0.674	0.574	0.0125175	MES_2	angptl2b
5.72304e-07	0.289371	0.816	0.757	0.0139528	MES_2	ptprga
6.00677e-07	0.290973	0.84	0.758	0.0146445	MES_2	fat1a
6.03318e-07	0.299574	0.391	0.293	0.0147089	MES_2	zbed4
6.11699e-07	0.324174	0.719	0.61	0.0149132	MES_2	bmpr2b
6.21225e-07	0.287082	0.622	0.522	0.0151455	MES_2	osbpl3b
7.28702e-07	0.296568	0.369	0.271	0.0177658	MES_2	ccdc88c
7.47174e-07	0.288001	0.299	0.204	0.0182161	MES_2	nfatc3a
8.50415e-07	0.322802	0.822	0.725	0.0207331	MES_2	gse1
9.09471e-07	0.435937	0.324	0.241	0.0221729	MES_2	tmeff1b
9.39371e-07	0.277907	0.301	0.211	0.0229019	MES_2	mdn1
9.42524e-07	0.279505	0.447	0.349	0.0229787	MES_2	gng5
9.49106e-07	0.250377	0.717	0.598	0.0231392	MES_2	mfap2
1.03742e-06	0.366954	0.625	0.537	0.0252922	MES_2	f13a1b
1.19152e-06	0.38102	0.42	0.321	0.0290492	MES_2	sh3d21
1.19489e-06	0.257546	0.508	0.405	0.0291313	MES_2	mbtps1
1.3427e-06	0.27933	0.488	0.379	0.0327349	MES_2	wdr26b
1.34879e-06	0.251451	0.288	0.195	0.0328836	MES_2	smarcd3b
1.35689e-06	0.267691	0.784	0.67	0.0330809	MES_2	p3h4
1.64146e-06	0.28202	0.288	0.201	0.0400187	MES_2	mpp7a
1.70825e-06	0.274597	0.76	0.65	0.0416471	MES_2	fbxw7
1.71931e-06	0.29567	0.798	0.705	0.0419168	MES_2	tubb4b
1.78527e-06	0.328737	0.355	0.26	0.0435249	MES_2	arhgef12a
1.83879e-06	0.282398	0.362	0.266	0.0448298	MES_2	plekhg5b
0	3.94692	0.891	0.011	0	MES_3	ednrab
4.61529e-226	2.96324	0.873	0.029	1.12521e-221	MES_3	scube1
2.2704e-191	5.45952	0.982	0.051	5.53523e-187	MES_3	lmx1ba
4.14318e-187	0.829731	0.255	0.001	1.01011e-182	MES_3	CR354610.1
3.30972e-176	4.17985	0.836	0.037	8.0691e-172	MES_3	kcnq5a
1.23615e-115	1.9388	0.618	0.031	3.01374e-111	MES_3	si:dkey-202e22.2
1.15662e-112	0.679986	0.273	0.004	2.81985e-108	MES_3	CABZ01088025.1
1.27989e-112	0.899058	0.345	0.008	3.12036e-108	MES_3	FP236542.1
3.36506e-103	1.54216	0.527	0.024	8.20401e-99	MES_3	ACOT12
8.34523e-102	0.960449	0.364	0.01	2.03457e-97	MES_3	CU326366.2
3.83488e-98	0.958008	0.255	0.004	9.34943e-94	MES_3	fscn1b
5.10517e-96	1.31794	0.309	0.008	1.24464e-91	MES_3	plch1
2.92606e-90	2.2055	0.564	0.033	7.13374e-86	MES_3	cadm2a
9.27157e-84	2.41424	0.709	0.061	2.26041e-79	MES_3	sema6ba
7.68969e-83	2.4696	0.891	0.098	1.87475e-78	MES_3	tnmd
1.36089e-80	2.37223	0.382	0.016	3.31784e-76	MES_3	pdgfbb
1.31192e-75	2.14098	0.691	0.065	3.19845e-71	MES_3	ppfibp2a
4.20541e-73	2.19204	0.745	0.079	1.02528e-68	MES_3	fam189a1
3.90524e-69	0.813279	0.327	0.014	9.52098e-65	MES_3	zgc:162612
9.09381e-69	1.8867	0.673	0.068	2.21707e-64	MES_3	hibadha
9.22024e-68	3.26885	0.655	0.066	2.24789e-63	MES_3	kcnq5b
4.04983e-66	1.72154	0.255	0.008	9.87349e-62	MES_3	cdh24b
1.8952e-65	2.00766	0.691	0.075	4.6205e-61	MES_3	rhoq
3.75876e-62	1.27088	0.382	0.022	9.16385e-58	MES_3	FP236542.2
4.62577e-61	1.88587	0.727	0.091	1.12776e-56	MES_3	apcdd1l
1.7593e-60	0.792092	0.255	0.009	4.28917e-56	MES_3	zeb2b
2.35753e-60	3.96096	0.855	0.147	5.74766e-56	MES_3	nav2a
2.41254e-57	2.63683	0.636	0.074	5.88176e-53	MES_3	map2
9.64979e-57	0.882576	0.345	0.019	2.35262e-52	MES_3	grm3
5.50894e-56	2.52593	0.527	0.05	1.34308e-51	MES_3	adarb1a
3.24984e-53	3.17166	0.982	0.23	7.9231e-49	MES_3	ncam1a
8.3244e-52	1.66306	0.745	0.113	2.02949e-47	MES_3	grasp
1.64119e-50	0.682977	0.218	0.008	4.00121e-46	MES_3	rpp25a
1.75474e-50	2.48315	0.855	0.178	4.27805e-46	MES_3	phldb2b
4.15925e-50	2.3023	0.545	0.061	1.01402e-45	MES_3	tox
2.47867e-49	1.56122	0.709	0.106	6.04301e-45	MES_3	ELAPOR2.1
2.82642e-47	2.51665	0.964	0.255	6.8908e-43	MES_3	adgrl2a
2.72405e-46	2.3213	0.873	0.182	6.64123e-42	MES_3	cpn1
5.72991e-46	1.38909	0.473	0.048	1.39695e-41	MES_3	emilin1a
2.58433e-45	1.45369	0.673	0.102	6.3006e-41	MES_3	zdhhc20a
5.38065e-45	2.02245	0.545	0.067	1.3118e-40	MES_3	cyth3a
2.96476e-44	1.86151	0.745	0.136	7.22809e-40	MES_3	ptch2
1.70789e-43	1.39705	0.527	0.061	4.16383e-39	MES_3	jupb
2.10873e-43	1.83812	0.6	0.085	5.14109e-39	MES_3	dip2cb
1.85358e-42	1.29162	0.436	0.044	4.51904e-38	MES_3	fgfr4
2.22959e-42	2.63946	0.582	0.085	5.43573e-38	MES_3	pthlha
4.45189e-41	2.77815	0.945	0.298	1.08537e-36	MES_3	lamc3
5.45229e-41	1.05161	0.382	0.034	1.32927e-36	MES_3	rps6ka5
8.08887e-40	1.91525	0.891	0.224	1.97207e-35	MES_3	stard9
9.08558e-40	2.02902	0.673	0.112	2.21506e-35	MES_3	adgrv1
1.18249e-39	1.26134	0.473	0.055	2.8829e-35	MES_3	efhc1
2.11439e-39	1.09633	0.473	0.054	5.15488e-35	MES_3	fndc1
9.07499e-39	1.75476	0.545	0.078	2.21248e-34	MES_3	ssbp2
1.30856e-38	1.60805	0.673	0.12	3.19026e-34	MES_3	UNC5C
1.89237e-38	2.19796	0.764	0.165	4.61361e-34	MES_3	SEMA4F
1.59238e-37	0.856711	0.273	0.018	3.88222e-33	MES_3	CR392045.1
1.26639e-35	1.71132	0.764	0.169	3.08745e-31	MES_3	wnt10a
4.58757e-35	3.01741	0.982	0.502	1.11845e-30	MES_3	sema5a
7.47173e-35	1.39385	0.236	0.015	1.82161e-30	MES_3	cps1
1.27837e-34	2.17211	0.945	0.33	3.11666e-30	MES_3	pear1
1.78647e-34	0.758656	0.364	0.036	4.35543e-30	MES_3	CR356242.1
2.66234e-34	1.30065	0.709	0.146	6.49078e-30	MES_3	pde4cb
6.70125e-34	2.48976	1	0.597	1.63376e-29	MES_3	plxna3
1.38274e-33	1.82344	0.673	0.134	3.37112e-29	MES_3	cdh7a
3.25003e-33	1.66665	0.727	0.162	7.92357e-29	MES_3	mapkapk3
5.10867e-33	0.698625	0.2	0.011	1.24549e-28	MES_3	cep70
1.32059e-31	1.25816	0.473	0.068	3.21961e-27	MES_3	si:dkey-121b10.7
2.27154e-31	0.831043	0.218	0.015	5.538e-27	MES_3	BX601646.1
4.38228e-31	1.77584	0.618	0.127	1.0684e-26	MES_3	RTKN
6.25242e-31	0.66711	0.218	0.015	1.52434e-26	MES_3	BEND4
1.43499e-30	2.0207	0.727	0.185	3.4985e-26	MES_3	inpp4b
4.4843e-30	1.00387	0.418	0.057	1.09327e-25	MES_3	tesk2
2.40975e-29	3.14771	0.982	0.577	5.87497e-25	MES_3	tshz2
2.52e-29	2.09566	0.982	0.411	6.14376e-25	MES_3	runx2a
2.5962e-29	3.33453	0.836	0.292	6.32953e-25	MES_3	itga8
9.35709e-28	2.19707	0.873	0.31	2.28126e-23	MES_3	runx2b
1.64369e-27	1.16329	0.582	0.113	4.0073e-23	MES_3	CABZ01043952.1
1.86477e-27	1.52163	0.927	0.274	4.5463e-23	MES_3	cdh11
1.36288e-26	1.64295	0.909	0.306	3.32269e-22	MES_3	ntd5
1.39294e-26	1.96714	0.818	0.244	3.39598e-22	MES_3	mmp9
2.19527e-26	1.64087	0.455	0.077	5.35206e-22	MES_3	BX957281.1
3.05373e-26	1.68498	0.709	0.175	7.44499e-22	MES_3	mef2cb
3.53259e-26	1.74144	0.782	0.252	8.61245e-22	MES_3	fgd4a
1.10903e-25	0.785717	0.236	0.021	2.70382e-21	MES_3	cntn3a.2
5.29514e-25	1.53842	0.618	0.15	1.29095e-20	MES_3	BCR
1.0876e-24	1.20917	0.273	0.029	2.65156e-20	MES_3	b4galnt4b
3.14502e-24	1.31638	0.6	0.146	7.66756e-20	MES_3	plxnb3
3.56743e-24	1.78362	1	0.751	8.69741e-20	MES_3	furina
3.67612e-24	1.52871	0.6	0.147	8.96237e-20	MES_3	fcho1
8.49764e-24	1.987	0.964	0.58	2.07173e-19	MES_3	enpp1
9.04788e-24	2.05711	0.8	0.293	2.20587e-19	MES_3	pag1
1.29067e-23	1.2727	0.418	0.069	3.14664e-19	MES_3	lrp1ba
1.91922e-23	0.993016	0.273	0.031	4.67907e-19	MES_3	sned1
2.10953e-23	0.612468	0.291	0.034	5.14302e-19	MES_3	lrp1ba.1
4.11652e-23	1.75059	0.782	0.291	1.00361e-18	MES_3	asap2a
4.54749e-23	1.82189	0.909	0.448	1.10868e-18	MES_3	fbrsl1
5.93442e-23	1.21814	0.527	0.111	1.44681e-18	MES_3	nr3c2
6.14691e-23	1.36967	0.418	0.074	1.49862e-18	MES_3	znf516
1.63838e-22	1.25265	0.618	0.159	3.99436e-18	MES_3	ldlrad4b
1.8694e-22	1.74432	0.691	0.215	4.55759e-18	MES_3	plxna4
2.28019e-22	0.762095	0.273	0.032	5.55911e-18	MES_3	bcl11ab
3.24568e-22	1.20114	0.473	0.091	7.91297e-18	MES_3	mmp17a
6.13083e-22	0.89217	0.345	0.052	1.4947e-17	MES_3	si:ch211-51c14.1
9.16759e-22	1.05711	0.473	0.094	2.23506e-17	MES_3	BX957317.2
1.24226e-21	1.10344	0.527	0.114	3.02862e-17	MES_3	fgf10b
2.08214e-21	1.81003	0.855	0.394	5.07625e-17	MES_3	supt3h
2.09397e-21	1.56312	0.618	0.177	5.10511e-17	MES_3	nkain4
2.14156e-21	2.18311	0.782	0.339	5.22112e-17	MES_3	dab2ipb
2.55513e-21	1.7303	0.909	0.444	6.2294e-17	MES_3	lamb1a
2.83085e-21	1.20291	0.564	0.136	6.9016e-17	MES_3	zeb2a
2.97235e-21	0.972716	0.4	0.069	7.24658e-17	MES_3	cyb5r4
4.75533e-21	1.45128	1	0.829	1.15935e-16	MES_3	cux1a
5.35165e-21	1.80249	0.509	0.119	1.30473e-16	MES_3	sytl3
6.84854e-21	1.76312	0.8	0.32	1.66967e-16	MES_3	emid1
8.99249e-21	1.48263	0.636	0.187	2.19237e-16	MES_3	nrp1a
2.6855e-20	1.53559	0.818	0.352	6.54725e-16	MES_3	ptpn4a
4.58401e-20	1.21826	0.745	0.245	1.11758e-15	MES_3	si:dkey-101k6.5
5.31689e-20	1.71441	0.709	0.238	1.29626e-15	MES_3	im:7142702
9.6301e-20	1.5186	0.909	0.516	2.34782e-15	MES_3	ptprsa.1
1.3197e-19	0.567028	0.236	0.028	3.21744e-15	MES_3	fbxo7
1.94741e-19	1.12933	0.927	0.432	4.74779e-15	MES_3	slc12a2
1.95778e-19	2.07954	0.927	0.495	4.77307e-15	MES_3	si:dkey-12l12.1
3.20483e-19	1.37206	0.745	0.275	7.81338e-15	MES_3	slc38a4
3.91995e-19	1.70642	0.836	0.365	9.55683e-15	MES_3	fgfr3
1.07879e-18	1.17284	0.418	0.089	2.6301e-14	MES_3	gpc1a
1.8709e-18	1.35096	0.818	0.319	4.56126e-14	MES_3	efnb1
2.08267e-18	1.19264	0.473	0.112	5.07756e-14	MES_3	mgat4b
2.18787e-18	1.29273	0.636	0.202	5.33402e-14	MES_3	crip2
4.21906e-18	0.58879	0.236	0.03	1.02861e-13	MES_3	arhgap22
6.6029e-18	1.37157	0.618	0.201	1.60979e-13	MES_3	stox1
1.4044e-17	1.13595	0.836	0.39	3.42393e-13	MES_3	smarca4a
1.56761e-17	1.45266	0.764	0.319	3.82184e-13	MES_3	ptch1
2.1938e-17	1.174	0.491	0.12	5.3485e-13	MES_3	mmp11b
2.78969e-17	1.43359	0.982	0.671	6.80126e-13	MES_3	FP102018.1
2.87423e-17	1.0955	0.818	0.344	7.00738e-13	MES_3	ryk
3.26366e-17	1.49016	0.945	0.58	7.95679e-13	MES_3	angptl2b
6.24034e-17	1.14768	0.945	0.564	1.5214e-12	MES_3	sipa1l3
7.3195e-17	1.43569	0.836	0.441	1.78449e-12	MES_3	CU639469.1
2.26356e-16	1.17639	0.473	0.121	5.51856e-12	MES_3	inhbb
2.47703e-16	0.414408	0.2	0.023	6.039e-12	MES_3	dnah1
3.04188e-16	1.17512	0.636	0.221	7.41611e-12	MES_3	neo1b
4.30373e-16	1.26037	0.636	0.216	1.04925e-11	MES_3	s1pr5a
5.16901e-16	0.67602	0.291	0.049	1.2602e-11	MES_3	cntnap2a
7.28525e-16	1.40256	0.527	0.155	1.77614e-11	MES_3	shroom3
7.97864e-16	1.01391	0.545	0.163	1.94519e-11	MES_3	kctd7
8.28296e-16	0.918434	0.455	0.112	2.01939e-11	MES_3	trim66
8.84219e-16	1.32612	0.618	0.214	2.15573e-11	MES_3	epha3
1.01788e-15	0.994887	0.545	0.163	2.48158e-11	MES_3	si:ch211-37e10.2
1.12641e-15	1.88074	0.855	0.475	2.74619e-11	MES_3	efnb3b
1.30763e-15	1.17424	0.745	0.318	3.188e-11	MES_3	tnfrsf19
2.02247e-15	1.22689	0.836	0.384	4.93079e-11	MES_3	CABZ01044099.1
3.42384e-15	1.34739	0.873	0.494	8.34733e-11	MES_3	kremen1
4.27932e-15	0.612028	0.273	0.046	1.0433e-10	MES_3	atp2a1
7.55065e-15	0.631172	0.291	0.053	1.84085e-10	MES_3	scml2
7.58476e-15	0.615969	0.6	0.197	1.84916e-10	MES_3	ccl25b
7.83383e-15	1.04754	0.545	0.175	1.90989e-10	MES_3	efnb2a
8.79794e-15	1.03257	0.509	0.155	2.14494e-10	MES_3	dennd5b
1.40553e-14	0.840952	0.455	0.12	3.42669e-10	MES_3	runx1t1
1.47323e-14	1.25918	0.945	0.615	3.59174e-10	MES_3	cpe
1.47823e-14	1.37264	1	0.73	3.60393e-10	MES_3	cacna1g
1.48506e-14	1.49237	0.855	0.514	3.62058e-10	MES_3	sh3rf1
1.49249e-14	0.848699	0.345	0.074	3.6387e-10	MES_3	ly6pge
1.83915e-14	1.21018	0.691	0.271	4.48386e-10	MES_3	plekhg5b
2.61717e-14	1.20938	0.8	0.399	6.38067e-10	MES_3	triob
3.8212e-14	1.54198	0.636	0.254	9.31609e-10	MES_3	rbfox1
8.79158e-14	1.02992	0.655	0.248	2.14339e-09	MES_3	hs6st1b
8.88754e-14	1.18544	0.345	0.076	2.16678e-09	MES_3	kcnd1
9.35324e-14	0.630957	0.364	0.085	2.28032e-09	MES_3	CR382300.2
9.44673e-14	0.978971	0.418	0.111	2.30311e-09	MES_3	zmat4b
1.02087e-13	2.38405	0.345	0.083	2.48887e-09	MES_3	nrxn3a
1.25498e-13	1.02328	0.436	0.12	3.05965e-09	MES_3	efnb2b
2.08425e-13	0.743081	0.309	0.064	5.08141e-09	MES_3	fam174b
2.13509e-13	1.21768	0.582	0.204	5.20536e-09	MES_3	hpse2
2.32353e-13	0.864607	0.6	0.211	5.66476e-09	MES_3	rflna
2.33812e-13	1.02833	0.655	0.271	5.70033e-09	MES_3	arid3b
2.50222e-13	1.54532	0.473	0.14	6.1004e-09	MES_3	fam102aa
2.64164e-13	0.929676	0.236	0.04	6.44031e-09	MES_3	scxa
2.93581e-13	1.16461	0.945	0.613	7.15751e-09	MES_3	tenm3
2.97326e-13	1.22017	0.691	0.304	7.2488e-09	MES_3	jcada
3.03115e-13	0.506555	0.309	0.063	7.38994e-09	MES_3	kcng3
3.10423e-13	0.401003	0.255	0.045	7.56811e-09	MES_3	CABZ01043953.1
3.14427e-13	2.24433	0.891	0.574	7.66573e-09	MES_3	edil3a
3.78161e-13	1.00199	0.382	0.099	9.21957e-09	MES_3	rspo2
4.21112e-13	0.637948	0.236	0.04	1.02667e-08	MES_3	gal3st2
4.88432e-13	0.792153	0.455	0.135	1.1908e-08	MES_3	elmo3
5.45989e-13	0.579044	0.218	0.035	1.33112e-08	MES_3	kif1aa
5.76821e-13	0.896338	0.455	0.137	1.40629e-08	MES_3	cited1
7.39751e-13	0.830692	0.509	0.165	1.80351e-08	MES_3	lrch1
8.83122e-13	1.0787	0.8	0.396	2.15305e-08	MES_3	ARHGEF25
1.05038e-12	1.3236	0.582	0.231	2.56083e-08	MES_3	picalma
1.2563e-12	1.10242	0.891	0.516	3.06287e-08	MES_3	zgc:154058
1.29493e-12	2.59335	0.709	0.341	3.15703e-08	MES_3	cntfr
1.39971e-12	1.21632	0.764	0.403	3.41249e-08	MES_3	epha2b
1.4641e-12	1.04038	0.327	0.077	3.56947e-08	MES_3	eva1a
1.58717e-12	1.49339	0.418	0.123	3.86952e-08	MES_3	pcdh17
2.18973e-12	0.361378	0.255	0.047	5.33857e-08	MES_3	si:dkey-181m9.8
2.40809e-12	0.894112	0.327	0.08	5.87091e-08	MES_3	ddx43
3.78955e-12	1.13928	0.836	0.518	9.23893e-08	MES_3	ppp1r14bb
4.49277e-12	0.951625	0.364	0.094	1.09534e-07	MES_3	ulk1b
7.15685e-12	1.04112	0.691	0.316	1.74484e-07	MES_3	gli1
7.93778e-12	1.06863	0.8	0.476	1.93523e-07	MES_3	ext1a
1.01463e-11	0.524627	0.327	0.077	2.47366e-07	MES_3	slc44a5b
1.12837e-11	0.857556	0.6	0.215	2.75097e-07	MES_3	fpr1
1.21102e-11	1.07041	0.527	0.185	2.95247e-07	MES_3	adgrl3.1
1.24728e-11	1.0073	0.764	0.369	3.04086e-07	MES_3	mcc
1.57939e-11	0.844814	0.364	0.099	3.85055e-07	MES_3	si:ch211-169p10.1
2.34775e-11	0.816811	0.4	0.11	5.7238e-07	MES_3	cd248a
2.68049e-11	1.4947	0.564	0.228	6.53502e-07	MES_3	sox6
2.71194e-11	0.756093	0.455	0.147	6.6117e-07	MES_3	rorcb
3.13158e-11	1.44439	0.727	0.407	7.6348e-07	MES_3	myo1ea
3.9117e-11	0.5631	0.309	0.073	9.53672e-07	MES_3	efnb3a
4.353e-11	1.28159	0.364	0.097	1.06126e-06	MES_3	itga10
5.22225e-11	0.705069	0.436	0.139	1.27318e-06	MES_3	tcf7
5.55694e-11	1.10529	0.782	0.441	1.35478e-06	MES_3	dgkh
6.50733e-11	1.26718	0.455	0.151	1.58649e-06	MES_3	gpc5c
6.69938e-11	0.899586	0.782	0.437	1.63331e-06	MES_3	fam107b
9.05401e-11	0.523412	0.255	0.054	2.20737e-06	MES_3	satb2
9.27218e-11	0.699034	0.309	0.076	2.26056e-06	MES_3	ampd2b
1.08612e-10	0.987551	0.982	0.708	2.64795e-06	MES_3	dkk3b
1.11574e-10	1.06943	0.545	0.21	2.72018e-06	MES_3	lef1
1.14751e-10	1.40014	0.364	0.105	2.79762e-06	MES_3	igsf21a
1.68406e-10	1.19559	0.691	0.329	4.10574e-06	MES_3	fhod3b
1.79959e-10	0.861926	0.691	0.335	4.3874e-06	MES_3	evx1.1
2.35279e-10	0.946392	0.709	0.317	5.73611e-06	MES_3	fgl1
2.63654e-10	1.09774	0.764	0.488	6.42788e-06	MES_3	rerea
3.03299e-10	0.98344	0.564	0.223	7.39443e-06	MES_3	nkd1
3.25524e-10	0.876107	0.364	0.108	7.93629e-06	MES_3	fbln5
3.57188e-10	1.7487	0.655	0.35	8.70823e-06	MES_3	spon1b
4.05702e-10	0.901724	0.4	0.13	9.89102e-06	MES_3	rhbdf1b
4.49202e-10	0.963511	0.491	0.18	1.09515e-05	MES_3	clstn1
4.85154e-10	0.927273	0.345	0.102	1.1828e-05	MES_3	itpkb
5.251e-10	0.970732	0.836	0.561	1.28019e-05	MES_3	traf4a
5.70857e-10	1.18732	0.764	0.436	1.39175e-05	MES_3	zdhhc8b
5.77345e-10	0.713102	0.4	0.128	1.40757e-05	MES_3	poc1bl
5.91049e-10	0.939891	0.255	0.057	1.44098e-05	MES_3	antxr1b
7.96921e-10	0.909272	0.327	0.093	1.94289e-05	MES_3	APCDD1
9.30685e-10	0.964544	0.727	0.397	2.26901e-05	MES_3	cx43.4
9.72894e-10	0.880459	0.636	0.301	2.37192e-05	MES_3	pth1r
1.03961e-09	0.567397	0.2	0.039	2.53457e-05	MES_3	CABZ01065423.1
1.27664e-09	0.813799	0.618	0.27	3.11244e-05	MES_3	hoxa4a
1.45718e-09	0.455489	0.2	0.038	3.55261e-05	MES_3	ek1
1.50052e-09	0.829196	0.345	0.106	3.65826e-05	MES_3	BX005154.1
1.57063e-09	0.982794	0.4	0.137	3.8292e-05	MES_3	ttyh2
1.60203e-09	0.575595	0.436	0.146	3.90574e-05	MES_3	asah2
1.60554e-09	0.921354	0.764	0.442	3.9143e-05	MES_3	MYO9B
1.70684e-09	0.645745	0.236	0.054	4.16127e-05	MES_3	si:dkey-34e4.1
1.86958e-09	0.962798	0.982	0.826	4.55803e-05	MES_3	antxr2a
1.95373e-09	1.51755	0.673	0.358	4.7632e-05	MES_3	rbfox3a
1.9539e-09	0.425507	0.345	0.096	4.7636e-05	MES_3	kalrnb
2.02595e-09	1.50733	0.636	0.352	4.93926e-05	MES_3	oafa
2.4871e-09	0.741318	0.418	0.146	6.06355e-05	MES_3	si:ch211-218g4.2
2.87872e-09	0.942419	0.527	0.214	7.01832e-05	MES_3	kdm6a
3.52787e-09	0.840103	0.364	0.117	8.60095e-05	MES_3	hs6st1a
3.957e-09	0.732672	0.491	0.179	9.64717e-05	MES_3	sema3e
4.0302e-09	0.595647	0.273	0.069	9.82563e-05	MES_3	gas2a
4.22532e-09	0.647395	0.345	0.109	0.000103013	MES_3	trim37
4.99987e-09	0.848223	0.727	0.43	0.000121897	MES_3	atad2b
6.15419e-09	0.733514	0.4	0.138	0.000150039	MES_3	adamts14
6.17302e-09	1.0759	0.691	0.366	0.000150498	MES_3	pde10a
6.30363e-09	0.878671	0.673	0.348	0.000153683	MES_3	emp2
6.47839e-09	0.944587	0.945	0.713	0.000157943	MES_3	robo1
7.14677e-09	0.885372	0.491	0.203	0.000174238	MES_3	nckap5l
8.62987e-09	0.606116	0.745	0.412	0.000210396	MES_3	kifc3
1.04177e-08	0.715835	0.564	0.252	0.000253984	MES_3	trim33
1.05239e-08	0.837672	0.636	0.339	0.000256574	MES_3	kdm1a
1.11466e-08	0.827067	0.491	0.208	0.000271755	MES_3	zgc:92140
1.19711e-08	1.13484	0.727	0.443	0.000291855	MES_3	tspan9a
1.34153e-08	1.0083	0.6	0.309	0.000327064	MES_3	cachd1
1.47962e-08	1.01162	0.764	0.498	0.000360732	MES_3	dcbld1
1.61736e-08	0.764929	0.455	0.179	0.000394313	MES_3	rftn2
1.63435e-08	0.857766	0.327	0.104	0.000398453	MES_3	tlcd5a
1.64028e-08	0.826655	0.891	0.691	0.0003999	MES_3	insrb
1.72147e-08	0.847864	0.855	0.647	0.000419695	MES_3	tanc2a
1.80243e-08	1.13367	0.564	0.262	0.000439433	MES_3	bcl11ba
1.84378e-08	0.715944	0.455	0.171	0.000449513	MES_3	si:dkey-117m1.4
1.89531e-08	1.15857	0.6	0.296	0.000462076	MES_3	arhgap24
2.2801e-08	0.733043	0.364	0.122	0.000555888	MES_3	tox3
2.63941e-08	0.971158	0.709	0.389	0.000643489	MES_3	TMEM132C
2.83688e-08	0.580781	0.327	0.103	0.000691631	MES_3	zbtb18
3.28898e-08	0.791678	0.855	0.618	0.000801853	MES_3	chd9
3.36908e-08	0.979796	0.709	0.403	0.000821383	MES_3	phldb2a
3.43152e-08	1.58571	0.436	0.173	0.000836605	MES_3	dachd
3.47203e-08	0.789614	0.491	0.21	0.000846481	MES_3	nfatc3a
3.52858e-08	0.502938	0.4	0.144	0.000860269	MES_3	ddah2
3.60011e-08	0.764774	0.509	0.224	0.000877708	MES_3	cpdp
3.60138e-08	0.901175	0.909	0.634	0.000878016	MES_3	sdc2
3.64507e-08	0.59885	0.327	0.106	0.000888667	MES_3	fam117aa
3.65361e-08	0.760306	0.364	0.128	0.000890751	MES_3	vstm4b
3.99717e-08	0.372727	0.255	0.066	0.000974511	MES_3	CABZ01050062.1
4.0498e-08	1.19026	0.818	0.586	0.000987342	MES_3	macrod2
4.1568e-08	0.78683	0.927	0.776	0.00101343	MES_3	rarga
4.28798e-08	0.745391	0.855	0.573	0.00104541	MES_3	tbl1xr1a
4.30452e-08	0.450947	0.218	0.052	0.00104944	MES_3	cgas
4.51851e-08	0.904616	0.6	0.319	0.00110161	MES_3	pcsk5b
4.86493e-08	0.371765	0.2	0.045	0.00118607	MES_3	CABZ01092781.1
5.06755e-08	0.619313	0.909	0.835	0.00123547	MES_3	sfpq
5.0951e-08	0.935439	0.509	0.231	0.00124219	MES_3	foxp1a
5.65551e-08	0.622076	0.873	0.604	0.00137881	MES_3	serpine2
6.82453e-08	0.871767	0.527	0.248	0.00166382	MES_3	pdgfab
8.71052e-08	0.897124	0.582	0.278	0.00212362	MES_3	mxra5a
9.37171e-08	1.0485	0.709	0.444	0.00228482	MES_3	ndst1b
9.43125e-08	0.74709	0.909	0.658	0.00229934	MES_3	ptprfb
1.04844e-07	0.845536	0.691	0.401	0.00255609	MES_3	psd3l
1.15135e-07	0.774166	0.8	0.464	0.00280699	MES_3	cx43
1.15691e-07	0.78714	0.364	0.136	0.00282055	MES_3	si:dkey-253d23.4
1.21098e-07	0.755105	0.509	0.236	0.00295236	MES_3	gmps
1.27495e-07	0.68456	0.291	0.089	0.00310834	MES_3	cpne4a
1.29725e-07	0.889446	0.473	0.211	0.00316269	MES_3	adam12
1.55796e-07	0.534831	0.236	0.064	0.00379831	MES_3	ADGRL3
1.67671e-07	0.856154	0.8	0.525	0.00408783	MES_3	erf
1.74189e-07	0.321421	0.2	0.048	0.00424673	MES_3	acer2
2.3631e-07	0.44085	0.273	0.081	0.00576123	MES_3	tbcela
2.81815e-07	0.815874	0.891	0.641	0.00687065	MES_3	bcas3
3.30314e-07	0.577978	0.782	0.518	0.00805306	MES_3	tmem131
3.31606e-07	0.752788	0.582	0.298	0.00808455	MES_3	plxdc2
3.55185e-07	0.693843	0.945	0.847	0.00865942	MES_3	neo1a
3.56211e-07	0.520049	0.455	0.189	0.00868442	MES_3	mtmr11
4.18521e-07	0.559811	0.255	0.075	0.0102035	MES_3	si:ch211-147k10.5
4.18616e-07	1.0396	0.655	0.38	0.0102059	MES_3	pknox2
4.27023e-07	0.637063	0.564	0.282	0.0104108	MES_3	fam53b
4.30472e-07	0.580054	0.491	0.219	0.0104949	MES_3	mink1
4.36682e-07	1.08619	0.564	0.296	0.0106463	MES_3	hoxa13a
4.37892e-07	1.50343	0.509	0.266	0.0106758	MES_3	cyth1b
4.44579e-07	0.95217	0.527	0.284	0.0108388	MES_3	llgl1
4.46136e-07	0.69873	0.455	0.198	0.0108768	MES_3	mertka
4.64815e-07	0.418572	0.236	0.066	0.0113322	MES_3	ube3b
4.66616e-07	0.753068	0.691	0.431	0.0113761	MES_3	maml3
5.03781e-07	0.413095	0.273	0.082	0.0122822	MES_3	smarcb1b
5.30973e-07	0.560606	0.436	0.193	0.0129451	MES_3	nlk1
5.4483e-07	0.520209	0.236	0.067	0.013283	MES_3	capn1b
6.05335e-07	0.390619	0.273	0.086	0.0147581	MES_3	atg4a
6.37163e-07	0.743926	0.727	0.419	0.015534	MES_3	FAT4
6.86077e-07	0.60909	0.255	0.078	0.0167266	MES_3	pik3ip1
6.91094e-07	0.768661	0.945	0.765	0.0168489	MES_3	fat1a
7.29965e-07	0.879778	0.582	0.328	0.0177965	MES_3	alcama
7.39776e-07	0.552872	0.4	0.163	0.0180357	MES_3	hoxa9a
7.67004e-07	0.623738	0.582	0.313	0.0186996	MES_3	clasp1a
7.84331e-07	0.352422	0.236	0.067	0.019122	MES_3	FUT9.1
7.9401e-07	0.632239	0.255	0.078	0.019358	MES_3	fes
8.41629e-07	0.782281	0.509	0.255	0.0205189	MES_3	stim2b
8.97535e-07	0.654152	0.4	0.159	0.0218819	MES_3	fam13a
9.6252e-07	0.639339	0.327	0.121	0.0234662	MES_3	invs
9.69234e-07	0.547876	0.6	0.323	0.0236299	MES_3	emc2
1.04047e-06	0.556151	0.291	0.097	0.0253665	MES_3	pcbp4
1.06924e-06	0.706144	0.655	0.394	0.0260682	MES_3	tspan9b
1.09007e-06	0.377317	0.309	0.106	0.0265759	MES_3	ankrd46a
1.10902e-06	0.448882	0.218	0.06	0.027038	MES_3	BX004771.2
1.11081e-06	0.513591	0.255	0.076	0.0270815	MES_3	slc6a15
1.24684e-06	0.381968	0.218	0.06	0.0303979	MES_3	cables2b
1.25426e-06	0.617283	0.345	0.13	0.0305789	MES_3	gtdc1
1.31254e-06	1.32528	0.527	0.273	0.0319997	MES_3	atrnl1a
1.34686e-06	0.687559	0.709	0.473	0.0328365	MES_3	pard3ab
1.41253e-06	0.52921	0.636	0.366	0.0344375	MES_3	gpatch8
1.72411e-06	0.622935	0.327	0.125	0.0420339	MES_3	tax1bp1a
1.76015e-06	0.66511	0.636	0.363	0.0429126	MES_3	hipk2
1.82585e-06	0.511042	1	0.947	0.0445142	MES_3	col12a1a
1.95598e-06	0.763237	0.945	0.712	0.0476867	MES_3	kansl1b
2.00315e-06	0.677653	0.382	0.158	0.0488369	MES_3	epb41l3b
2.01032e-06	0.798541	0.418	0.181	0.0490116	MES_3	angptl1a
2.02429e-06	0.308141	0.2	0.054	0.0493523	MES_3	napbb
0	3.65284	0.965	0.069	0	MES_4	col11a2
0	3.33106	0.912	0.038	0	MES_4	cd81b
0	3.30535	0.965	0.059	0	MES_4	panx3
0	3.28835	0.86	0.038	0	MES_4	si:ch211-106n13.3
0	3.24134	0.947	0.043	0	MES_4	slc8a4b
0	2.85225	0.924	0.06	0	MES_4	sgms2a
0	2.7851	0.865	0.049	0	MES_4	col5a2b
0	1.35169	0.626	0.01	0	MES_4	smpd3
2.27554e-306	4.775	0.971	0.083	5.54776e-302	MES_4	ifitm5
3.5611e-295	2.93343	0.731	0.035	8.68197e-291	MES_4	fgfbp2a
3.56409e-284	1.64436	0.696	0.033	8.68924e-280	MES_4	phospho1
4.49413e-273	1.8178	0.602	0.023	1.09567e-268	MES_4	bcan
5.09301e-267	2.08851	0.708	0.038	1.24168e-262	MES_4	scpp1
1.10677e-262	2.55151	0.883	0.069	2.6983e-258	MES_4	bgna
8.38487e-250	1.15647	0.48	0.013	2.04423e-245	MES_4	CRACD
4.13267e-249	1.78577	0.749	0.05	1.00755e-244	MES_4	slc6a15
7.18627e-231	0.824585	0.316	0.003	1.75201e-226	MES_4	ccl39.2
2.16648e-221	1.20907	0.444	0.013	5.28188e-217	MES_4	ihha
9.58431e-213	2.51064	0.854	0.088	2.33666e-208	MES_4	adgrv1
4.07368e-210	1.52537	0.626	0.04	9.93162e-206	MES_4	megf10
2.74136e-206	1.87561	0.795	0.071	6.68343e-202	MES_4	itga10
1.80576e-183	2.94783	0.842	0.11	4.40243e-179	MES_4	loxl4
2.65279e-180	1.50501	0.667	0.059	6.4675e-176	MES_4	tmem119a
5.14491e-169	1.25503	0.515	0.033	1.25433e-164	MES_4	plcd3b
1.92961e-152	1.41991	0.696	0.08	4.70439e-148	MES_4	bmp8a
1.10213e-147	1.34696	0.596	0.058	2.687e-143	MES_4	dhrs3b
1.86245e-137	0.579074	0.281	0.009	4.54064e-133	MES_4	slc17a6a
2.68258e-136	1.5674	0.69	0.084	6.54014e-132	MES_4	tnmd
1.46388e-123	1.94414	0.965	0.208	3.56894e-119	MES_4	ncam1a
3.31676e-123	1.9565	0.509	0.049	8.08625e-119	MES_4	entpd5a
1.12002e-122	1.62752	0.789	0.137	2.7306e-118	MES_4	ano5a
5.23846e-114	1.88348	0.433	0.036	1.27714e-109	MES_4	si:dkey-32e6.6
4.1633e-113	4.22884	1	0.473	1.01501e-108	MES_4	col10a1a
3.68517e-112	0.715604	0.322	0.018	8.98444e-108	MES_4	mfsd2b
9.89479e-112	2.02167	0.982	0.253	2.41235e-107	MES_4	cdh11
6.04436e-109	0.526462	0.24	0.009	1.47362e-104	MES_4	si:ch211-229n2.6
2.20651e-107	0.871481	0.345	0.023	5.37946e-103	MES_4	hs6st3b
4.67754e-104	1.67885	0.737	0.146	1.14038e-99	MES_4	pcolcea
1.87483e-102	1.09129	0.363	0.028	4.57083e-98	MES_4	pclob
2.74541e-102	1.38205	0.649	0.105	6.69331e-98	MES_4	sp7
4.91698e-102	1.04514	0.357	0.027	1.19876e-97	MES_4	cadm1b
1.89822e-101	2.06306	0.901	0.251	4.62786e-97	MES_4	CR376783.1
2.05541e-99	1.66383	0.836	0.193	5.0111e-95	MES_4	fpr1
4.0486e-98	1.52675	0.749	0.159	9.87048e-94	MES_4	p4ha1b
4.39416e-97	1.47358	0.62	0.098	1.0713e-92	MES_4	nlgn1
8.18332e-96	1.81836	0.749	0.157	1.99509e-91	MES_4	pltp
1.05061e-93	0.455112	0.275	0.016	2.5614e-89	MES_4	chst3b
2.06576e-91	2.57708	0.655	0.125	5.03632e-87	MES_4	col10a1b
2.73872e-91	0.599191	0.287	0.019	6.677e-87	MES_4	TTC9
2.08578e-90	1.3635	0.754	0.158	5.08514e-86	MES_4	mef2cb
7.8224e-90	1.09141	0.626	0.104	1.9071e-85	MES_4	inhbb
4.61864e-87	1.10517	0.509	0.072	1.12602e-82	MES_4	mxra5b
1.90977e-86	1.12729	0.596	0.101	4.65601e-82	MES_4	evla
2.46103e-85	0.554285	0.24	0.013	5.99999e-81	MES_4	si:ch211-62a1.3
1.7066e-81	1.72655	0.795	0.209	4.1607e-77	MES_4	sox6
7.76669e-81	1.74208	0.772	0.194	1.89352e-76	MES_4	prss35
7.57163e-80	1.01126	0.275	0.02	1.84596e-75	MES_4	fabp7a
1.61892e-79	1.36997	0.684	0.153	3.94693e-75	MES_4	hdac9b
5.14094e-79	0.813402	0.38	0.042	1.25336e-74	MES_4	sema3d
9.12229e-79	1.02972	0.55	0.094	2.22402e-74	MES_4	galnt14
8.2404e-77	1.14104	0.667	0.14	2.00901e-72	MES_4	runx3
6.03166e-74	1.62596	0.912	0.355	1.47052e-69	MES_4	arhgap29b
6.61755e-74	1.76765	0.889	0.307	1.61336e-69	MES_4	alcama
3.93125e-73	0.849647	0.392	0.049	9.58439e-69	MES_4	znf385a
4.49381e-73	0.873	0.456	0.065	1.09559e-68	MES_4	spp1
1.44324e-72	0.847504	0.637	0.136	3.51863e-68	MES_4	nav2a
2.00383e-72	0.577821	0.234	0.016	4.88535e-68	MES_4	CABZ01026153.1
2.58592e-72	1.21782	0.614	0.124	6.30448e-68	MES_4	fam102aa
1.21064e-70	1.65425	0.895	0.334	2.95155e-66	MES_4	plod2
1.03266e-68	0.981305	0.462	0.075	2.51762e-64	MES_4	slc6a17
2.93991e-67	0.802906	0.421	0.06	7.1675e-63	MES_4	si:ch211-202p1.5
3.71188e-66	0.537224	0.275	0.025	9.04957e-62	MES_4	zgc:92162
1.08971e-63	1.82959	0.614	0.155	2.65671e-59	MES_4	lrp8
2.48221e-63	0.599227	0.246	0.021	6.05163e-59	MES_4	ryr2b
1.28571e-62	0.572576	0.503	0.09	3.13456e-58	MES_4	phex
2.1393e-62	0.546578	0.234	0.019	5.21562e-58	MES_4	abca4b
8.49048e-61	1.03035	0.602	0.144	2.06998e-56	MES_4	dock4b
1.05886e-60	1.34152	0.959	0.625	2.58151e-56	MES_4	cd82b
8.19545e-60	1.55841	1	0.647	1.99805e-55	MES_4	ptprfb
1.32465e-58	1.55438	0.936	0.396	3.2295e-54	MES_4	runx2a
1.62085e-58	1.48382	0.836	0.283	3.95162e-54	MES_4	pth1r
3.97939e-58	1.87545	0.655	0.193	9.70176e-54	MES_4	znf385b
9.70611e-58	0.786218	0.439	0.078	2.36635e-53	MES_4	gpc1a
4.50102e-57	1.19271	0.515	0.11	1.09735e-52	MES_4	pcdh17
1.35283e-56	0.404136	0.263	0.028	3.29821e-52	MES_4	ccn4b
4.02776e-56	0.787887	0.596	0.144	9.81968e-52	MES_4	fscn1a
9.06948e-56	1.28762	0.801	0.279	2.21114e-51	MES_4	arhgap24
2.10495e-55	0.861597	0.456	0.085	5.13187e-51	MES_4	pcbp4
2.22308e-55	1.00474	0.749	0.23	5.41986e-51	MES_4	mmp9
7.26083e-55	0.484472	0.234	0.022	1.77019e-50	MES_4	mlip
1.92819e-54	0.73789	0.374	0.06	4.70094e-50	MES_4	si:dkey-121b10.7
2.37935e-54	0.678736	0.281	0.034	5.80085e-50	MES_4	cobl
1.84742e-53	1.1409	0.795	0.305	4.50402e-49	MES_4	dap
1.62331e-52	1.30355	0.86	0.36	3.95763e-48	MES_4	rgs12a
2.60641e-52	1.59502	0.977	0.586	6.35443e-48	MES_4	plxna3
4.09697e-52	0.834484	0.48	0.098	9.98841e-48	MES_4	bmp2b
1.11779e-51	0.346067	0.205	0.018	2.72517e-47	MES_4	noctb
4.73423e-51	0.566991	0.222	0.022	1.15421e-46	MES_4	atp2b3a
4.4494e-50	0.943364	0.632	0.183	1.08476e-45	MES_4	golim4b
6.85429e-50	0.535168	0.287	0.038	1.67108e-45	MES_4	ccdc85al
1.47493e-49	0.849008	0.485	0.108	3.59588e-45	MES_4	efnb2b
2.15229e-49	0.822016	0.468	0.099	5.24729e-45	MES_4	sgip1a
3.81526e-49	0.617221	0.316	0.047	9.3016e-45	MES_4	hpcal1
4.13738e-49	2.54904	0.895	0.509	1.00869e-44	MES_4	enam
4.92096e-49	1.71493	0.684	0.229	1.19973e-44	MES_4	abcc6a
1.4686e-48	0.842321	0.667	0.198	3.58045e-44	MES_4	pcolce2b
2.15374e-48	1.01344	0.725	0.238	5.25083e-44	MES_4	rbfox1
2.15707e-48	0.604354	0.216	0.022	5.25893e-44	MES_4	cldn19
1.11272e-47	0.89352	0.608	0.165	2.71281e-43	MES_4	sema3e
8.11223e-47	0.612271	0.275	0.037	1.97776e-42	MES_4	si:ch73-215f7.1
1.15318e-46	1.00422	0.871	0.35	2.81145e-42	MES_4	fgfr3
5.34637e-46	1.35812	0.608	0.202	1.30345e-41	MES_4	ckbb
7.5592e-46	0.792538	0.52	0.125	1.84293e-41	MES_4	cdh7a
2.30126e-45	1.30108	0.83	0.368	5.61047e-41	MES_4	tmem198b
3.61653e-45	0.442565	0.234	0.028	8.81709e-41	MES_4	tg
4.05901e-45	0.570414	0.392	0.077	9.89586e-41	MES_4	LOXL4
4.57082e-45	1.15275	1	0.936	1.11436e-40	MES_4	sparc
2.93643e-44	1.23378	0.573	0.166	7.15901e-40	MES_4	CACNA2D1
8.71073e-44	0.496299	0.269	0.038	2.12368e-39	MES_4	bmper
1.89791e-43	0.43971	0.275	0.04	4.62711e-39	MES_4	olfm3b
3.73087e-43	1.35107	0.947	0.579	9.09586e-39	MES_4	chsy1
6.80719e-43	0.550997	0.251	0.034	1.65959e-38	MES_4	si:ch211-106h11.3
1.20187e-42	0.944485	0.602	0.183	2.93016e-38	MES_4	fat3a
2.25822e-42	1.31366	0.942	0.57	5.50553e-38	MES_4	enpp1
9.85841e-42	0.367945	0.222	0.027	2.40348e-37	MES_4	si:dkeyp-97b10.3
1.03446e-41	0.542857	0.351	0.067	2.52202e-37	MES_4	tmie
3.67591e-41	1.16903	0.591	0.189	8.96187e-37	MES_4	mctp2a
4.22611e-41	0.960158	0.69	0.253	1.03033e-36	MES_4	schip1
5.5704e-41	0.381452	0.222	0.027	1.35806e-36	MES_4	si:ch211-110e21.3
9.00422e-41	1.05257	0.719	0.277	2.19523e-36	MES_4	nhsl1b
1.39998e-40	0.444271	0.292	0.048	3.41315e-36	MES_4	sc:d189
1.58785e-40	1.09768	0.795	0.354	3.87118e-36	MES_4	rcn1
1.91552e-40	0.421359	0.216	0.026	4.67003e-36	MES_4	si:ch211-253b8.5
1.4571e-39	0.550879	0.269	0.041	3.55242e-35	MES_4	kcnq2a
1.83534e-39	0.937334	0.357	0.073	4.47457e-35	MES_4	cyp2r1
2.9258e-39	1.10953	0.766	0.307	7.1331e-35	MES_4	emid1
5.73262e-39	0.596526	0.404	0.089	1.39761e-34	MES_4	gng2
8.76974e-39	1.06302	0.766	0.325	2.13806e-34	MES_4	tnfrsf11a
9.2744e-39	0.719246	0.52	0.146	2.2611e-34	MES_4	alcamb
1.78348e-38	1.0594	0.673	0.257	4.34812e-34	MES_4	ppp1r9ba
5.49385e-38	0.902749	0.632	0.217	1.3394e-33	MES_4	slc6a6b
9.21498e-38	0.597646	0.368	0.08	2.24661e-33	MES_4	parp12a
1.08932e-37	0.734169	0.216	0.028	2.65575e-33	MES_4	mkxa
1.14887e-37	1.20788	0.901	0.481	2.80094e-33	MES_4	kremen1
1.54669e-37	0.67456	0.497	0.14	3.77084e-33	MES_4	klf2b
1.87226e-37	0.367654	0.281	0.047	4.56457e-33	MES_4	satb2
3.20498e-37	1.07877	0.772	0.333	7.81375e-33	MES_4	elmo1
6.35048e-37	0.475515	0.205	0.026	1.54825e-32	MES_4	rassf7a
1.15637e-36	1.01555	0.994	0.952	2.81922e-32	MES_4	col1a2
6.09755e-36	0.746695	0.351	0.078	1.48658e-31	MES_4	NAV1
6.40856e-36	0.736672	0.544	0.164	1.56241e-31	MES_4	sdk2b
4.62276e-35	0.500319	0.357	0.079	1.12703e-30	MES_4	twf1b
1.81979e-34	1.12537	0.836	0.437	4.43665e-30	MES_4	gpc1b
4.76113e-34	0.932576	0.988	0.776	1.16076e-29	MES_4	col11a1b
2.13257e-33	0.505461	0.374	0.088	5.1992e-29	MES_4	kalrnb
2.73768e-33	0.928407	0.544	0.181	6.67446e-29	MES_4	glcci1a
3.83875e-33	1.04019	0.924	0.627	9.35887e-29	MES_4	afdna
4.10082e-33	1.21115	0.848	0.51	9.9978e-29	MES_4	nrp2a
4.82785e-33	0.949846	0.871	0.483	1.17703e-28	MES_4	p3h1
1.35084e-32	1.32096	0.965	0.705	3.29334e-28	MES_4	robo1
1.55112e-32	0.364998	0.216	0.033	3.78164e-28	MES_4	rrnad1
2.63767e-32	0.721053	0.497	0.154	6.43063e-28	MES_4	kctd7
3.10919e-32	0.892202	0.719	0.315	7.58021e-28	MES_4	sh3d21
6.36756e-32	0.475091	0.368	0.088	1.55241e-27	MES_4	apcdd1l
1.03314e-31	0.426407	0.275	0.052	2.5188e-27	MES_4	hspa12b
1.56546e-31	1.83565	0.719	0.329	3.81659e-27	MES_4	cntfr
2.54643e-31	1.01878	0.953	0.663	6.20821e-27	MES_4	FP102018.1
4.32837e-31	1.01497	0.936	0.625	1.05526e-26	MES_4	rcn3
5.86606e-31	0.941059	0.789	0.414	1.43014e-26	MES_4	mfge8b
7.77929e-31	0.384207	0.292	0.061	1.89659e-26	MES_4	natd1
1.2176e-30	0.698355	0.766	0.337	2.9685e-26	MES_4	si:ch1073-459j12.1
2.53886e-30	0.965213	0.895	0.572	6.18974e-26	MES_4	serpinh1a
5.1376e-30	0.821977	0.871	0.441	1.25255e-25	MES_4	srgap3
5.71964e-30	0.408866	0.48	0.141	1.39445e-25	MES_4	fbn2a
6.31863e-30	0.400135	0.234	0.041	1.54048e-25	MES_4	fgfr4
6.47659e-30	0.545852	0.357	0.09	1.57899e-25	MES_4	BX005470.1
1.08769e-29	0.480676	0.304	0.069	2.65179e-25	MES_4	epb41l4a
1.37313e-29	0.900136	0.725	0.331	3.34769e-25	MES_4	ccdc80
1.64628e-29	0.435776	0.281	0.059	4.01362e-25	MES_4	sh3glb2a
4.62173e-29	0.646775	0.602	0.221	1.12678e-24	MES_4	robo2.1
2.0879e-28	0.78507	0.55	0.207	5.0903e-24	MES_4	acap3b
7.13681e-28	0.638689	0.468	0.153	1.73996e-23	MES_4	ldlrad4b
7.30116e-28	0.412129	0.228	0.042	1.78002e-23	MES_4	tll1
1.11953e-27	0.93454	0.392	0.113	2.72942e-23	MES_4	sytl3
3.42312e-27	0.404989	0.228	0.044	8.34556e-23	MES_4	dlx4a
7.06867e-27	0.460589	0.327	0.082	1.72334e-22	MES_4	megf6b
7.49139e-27	0.709885	0.661	0.263	1.8264e-22	MES_4	frem2a
7.57984e-27	0.477471	0.45	0.141	1.84796e-22	MES_4	kat2b
1.09557e-26	0.402243	0.433	0.128	2.67101e-22	MES_4	cpz
1.24309e-26	0.54517	0.351	0.095	3.03065e-22	MES_4	coq5
1.36229e-26	0.842221	0.825	0.458	3.32126e-22	MES_4	kdelr2b
1.37735e-26	0.66511	0.614	0.244	3.35799e-22	MES_4	pkig
2.73566e-26	0.383821	0.222	0.042	6.66954e-22	MES_4	zgc:172122
4.23465e-26	0.364294	0.234	0.047	1.03241e-21	MES_4	CABZ01048666.1
7.65391e-26	0.891242	0.585	0.24	1.86602e-21	MES_4	arvcfb
1.22412e-25	0.751059	0.298	0.076	2.98441e-21	MES_4	adarb2
1.65585e-25	0.804593	0.924	0.496	4.03696e-21	MES_4	cspg4
2.29014e-25	0.426497	0.292	0.072	5.58336e-21	MES_4	tgfb5
3.33461e-25	0.802742	0.93	0.695	8.12978e-21	MES_4	ssr3
5.94984e-25	0.38181	0.263	0.059	1.45057e-20	MES_4	ankhb
1.12496e-24	0.675247	0.667	0.294	2.74264e-20	MES_4	si:ch211-136a13.1
1.16232e-24	1.08429	0.942	0.751	2.83373e-20	MES_4	serpinh1b
1.38999e-24	0.820517	0.93	0.701	3.38879e-20	MES_4	qkia
1.45077e-24	0.8561	0.474	0.164	3.53699e-20	MES_4	pdgfc
2.42613e-24	0.763305	0.567	0.23	5.91491e-20	MES_4	slc41a2b
2.43445e-24	0.737613	0.865	0.489	5.93518e-20	MES_4	sipa1l2
2.58327e-24	0.487792	0.246	0.054	6.29801e-20	MES_4	cables2b
5.75963e-24	0.662073	0.708	0.336	1.4042e-19	MES_4	arhgap23a
1.35637e-23	0.771253	0.62	0.271	3.30682e-19	MES_4	creb3l1
1.36149e-23	0.368315	0.327	0.09	3.31932e-19	MES_4	ldlrap1b
1.88656e-23	0.324777	0.287	0.072	4.59942e-19	MES_4	nags
2.61111e-23	0.721774	0.795	0.435	6.36589e-19	MES_4	lman1
2.62769e-23	0.742983	0.813	0.476	6.40631e-19	MES_4	serp1
4.52411e-23	0.644862	0.567	0.236	1.10298e-18	MES_4	tmeff1b
5.17524e-23	0.780433	0.942	0.747	1.26172e-18	MES_4	serinc5
5.40304e-23	0.781579	0.918	0.606	1.31726e-18	MES_4	cpe
6.50721e-23	0.720867	0.509	0.194	1.58646e-18	MES_4	crip2
6.89693e-23	0.55876	0.404	0.13	1.68147e-18	MES_4	zeb2a
1.22943e-22	0.598623	0.614	0.285	2.99734e-18	MES_4	tmem45a
1.33296e-22	0.784282	0.871	0.617	3.24975e-18	MES_4	kdelr2a
1.97697e-22	0.817547	0.637	0.295	4.81986e-18	MES_4	atp11c
2.38475e-22	0.827948	0.696	0.359	5.81402e-18	MES_4	usp54a
2.50653e-22	0.6858	0.994	0.934	6.11092e-18	MES_4	col1a1b
3.30408e-22	0.512129	0.456	0.168	8.05535e-18	MES_4	efnb2a
5.20833e-22	0.733568	0.749	0.419	1.26979e-17	MES_4	sec61a1l
5.28224e-22	0.739762	0.725	0.391	1.28781e-17	MES_4	triob
8.0106e-22	0.629142	0.497	0.19	1.95298e-17	MES_4	thrap3a
8.88336e-22	0.695878	0.766	0.413	2.16576e-17	MES_4	p4ha2
9.25362e-22	0.518335	0.532	0.218	2.25603e-17	MES_4	ackr3b
1.12868e-21	0.789869	0.901	0.675	2.75172e-17	MES_4	ssr2
1.19653e-21	0.611137	0.532	0.22	2.91714e-17	MES_4	inavab
1.85862e-21	0.637041	0.708	0.355	4.5313e-17	MES_4	acvrl1
2.27803e-21	0.373749	0.292	0.081	5.55383e-17	MES_4	ldlrap1a
2.81274e-21	0.586793	0.655	0.306	6.85746e-17	MES_4	pik3r2
3.63608e-21	0.659231	0.725	0.394	8.86477e-17	MES_4	farp2
7.18314e-21	0.392368	0.251	0.063	1.75125e-16	MES_4	slc17a7b
1.03748e-20	0.411435	0.544	0.206	2.52938e-16	MES_4	kazald3
1.1226e-20	0.64982	0.304	0.086	2.73691e-16	MES_4	usta
1.33644e-20	0.562292	0.614	0.276	3.25825e-16	MES_4	ism1
1.51781e-20	0.862046	0.83	0.504	3.70042e-16	MES_4	tubb5
1.56199e-20	0.613654	0.433	0.16	3.80812e-16	MES_4	rras2
2.26639e-20	0.690082	0.947	0.78	5.52546e-16	MES_4	hdlbpa
2.47571e-20	0.652732	0.637	0.308	6.03579e-16	MES_4	hdac5
3.55095e-20	0.532875	0.69	0.348	8.65722e-16	MES_4	copz2
4.17644e-20	0.518575	0.485	0.188	1.01822e-15	MES_4	CABZ01056843.1
5.3121e-20	0.545575	0.409	0.145	1.29509e-15	MES_4	caskin1
5.36297e-20	0.372224	0.216	0.05	1.30749e-15	MES_4	ampd2a
5.88566e-20	0.542916	0.591	0.268	1.43492e-15	MES_4	ccdc88c
5.90353e-20	0.407143	0.421	0.149	1.43928e-15	MES_4	dixdc1a
1.38538e-19	0.53723	0.503	0.211	3.37756e-15	MES_4	lrrfip1a
1.52514e-19	0.649474	0.93	0.679	3.7183e-15	MES_4	fkbp9
1.66444e-19	0.497765	0.351	0.119	4.0579e-15	MES_4	wnt9a
1.87349e-19	0.675584	0.415	0.157	4.56757e-15	MES_4	si:ch211-37e10.2
2.40081e-19	0.498922	0.52	0.219	5.85318e-15	MES_4	stard8
2.42383e-19	0.618619	0.538	0.244	5.90931e-15	MES_4	kdelr3
5.92587e-19	0.448179	0.251	0.068	1.44473e-14	MES_4	sptbn5
8.90682e-19	0.439528	0.222	0.055	2.17148e-14	MES_4	lgi3
1.14748e-18	0.671489	0.766	0.447	2.79755e-14	MES_4	nbas
1.23265e-18	0.611221	0.784	0.475	3.0052e-14	MES_4	fkbp14
1.23351e-18	0.423759	0.368	0.127	3.00729e-14	MES_4	sema3ab
1.26514e-18	0.876845	0.503	0.21	3.08442e-14	MES_4	fam20cb
2.42016e-18	0.593188	0.661	0.343	5.90036e-14	MES_4	tram2
2.6224e-18	0.393599	0.444	0.173	6.39342e-14	MES_4	clstn1
3.06241e-18	0.609142	0.556	0.252	7.46617e-14	MES_4	adgrl2a
3.43997e-18	0.595017	0.439	0.174	8.38666e-14	MES_4	st6gal2a
4.63566e-18	0.848899	0.649	0.318	1.13017e-13	MES_4	CR936977.2
7.82618e-18	0.302922	0.222	0.056	1.90802e-13	MES_4	swap70b
7.97187e-18	0.614481	0.801	0.466	1.94354e-13	MES_4	efnb3b
7.99018e-18	0.472274	0.468	0.199	1.94801e-13	MES_4	farp1
8.16277e-18	0.55497	0.637	0.317	1.99008e-13	MES_4	tnfrsf21
8.9055e-18	0.409812	0.322	0.104	2.17116e-13	MES_4	ildr2
9.01684e-18	0.669911	0.86	0.589	2.1983e-13	MES_4	tram1
1.08279e-17	0.626239	0.825	0.532	2.63983e-13	MES_4	sec23a
1.15139e-17	0.390562	0.281	0.087	2.80709e-13	MES_4	dnpep
1.39761e-17	0.602946	0.392	0.152	3.40738e-13	MES_4	st8sia6
1.41728e-17	0.465542	0.421	0.166	3.45532e-13	MES_4	anxa13
1.70469e-17	0.382903	0.433	0.167	4.15603e-13	MES_4	casc4
1.71906e-17	0.626762	0.632	0.324	4.19108e-13	MES_4	cgref1
1.85442e-17	0.414896	0.421	0.162	4.52108e-13	MES_4	abr
2.19655e-17	0.634795	0.848	0.577	5.3552e-13	MES_4	si:ch73-46j18.5
2.26224e-17	0.686741	0.749	0.433	5.51535e-13	MES_4	CU639469.1
2.60276e-17	0.408332	0.251	0.073	6.34553e-13	MES_4	ncs1a
3.44432e-17	0.666921	0.813	0.538	8.39726e-13	MES_4	sec61a1
3.45712e-17	0.424287	0.444	0.183	8.42846e-13	MES_4	zgc:153675
4.11499e-17	0.678943	0.561	0.267	1.00324e-12	MES_4	ddc
5.58844e-17	0.402194	0.333	0.115	1.36246e-12	MES_4	klhl23
5.90061e-17	0.308535	0.234	0.064	1.43857e-12	MES_4	zmp:0000000760
6.13612e-17	0.778691	0.55	0.261	1.49599e-12	MES_4	ddr1
8.07793e-17	0.363158	0.766	0.441	1.9694e-12	MES_4	RALGDS
8.17252e-17	0.659719	0.602	0.314	1.99246e-12	MES_4	aldh18a1
1.00433e-16	0.409458	0.281	0.089	2.44857e-12	MES_4	oxct1a
1.06738e-16	0.567507	0.31	0.106	2.60226e-12	MES_4	cemip
1.31903e-16	0.542655	0.795	0.463	3.21579e-12	MES_4	slc39a7
1.31934e-16	0.59355	0.409	0.168	3.21656e-12	MES_4	moxd1
1.35005e-16	0.398807	0.211	0.056	3.29142e-12	MES_4	BX323453.1
1.38173e-16	0.472487	0.497	0.221	3.36866e-12	MES_4	peli2
1.38417e-16	0.433122	0.632	0.321	3.3746e-12	MES_4	col7a1
1.52116e-16	0.61159	0.865	0.607	3.70859e-12	MES_4	sec61b
1.63131e-16	0.410974	0.316	0.105	3.97713e-12	MES_4	ELAPOR2.1
1.84062e-16	0.819488	0.877	0.633	4.48742e-12	MES_4	asph
2.62035e-16	0.42076	0.304	0.103	6.38841e-12	MES_4	COLGALT1
2.74675e-16	0.62131	0.836	0.544	6.69658e-12	MES_4	ostc
4.38002e-16	0.358897	0.257	0.079	1.06785e-11	MES_4	wdr90
4.55232e-16	0.392517	0.304	0.103	1.10985e-11	MES_4	trim37
5.38086e-16	0.331389	0.222	0.062	1.31185e-11	MES_4	osbpl6
5.76018e-16	0.364926	0.31	0.106	1.40433e-11	MES_4	zgc:153184
6.14874e-16	0.60718	0.643	0.348	1.49906e-11	MES_4	anks1b
7.11574e-16	0.472612	0.515	0.241	1.73482e-11	MES_4	ier3ip1
8.74734e-16	0.87764	0.836	0.577	2.1326e-11	MES_4	srgap2
9.67403e-16	0.412554	0.515	0.233	2.35853e-11	MES_4	pdlim4
9.95949e-16	0.267579	0.287	0.093	2.42812e-11	MES_4	BX510992.1
1.19342e-15	0.352518	0.257	0.081	2.90957e-11	MES_4	CABZ01086041.1
1.51198e-15	0.454571	0.269	0.087	3.68622e-11	MES_4	adam19b
1.7403e-15	0.596855	0.392	0.16	4.24285e-11	MES_4	lrch1
1.84856e-15	0.391848	0.316	0.117	4.50678e-11	MES_4	ptdss2
1.99595e-15	0.503828	0.702	0.395	4.86613e-11	MES_4	krtcap2
2.06577e-15	0.428883	0.281	0.094	5.03634e-11	MES_4	mybphb
2.11305e-15	0.476917	0.637	0.343	5.15162e-11	MES_4	ckba
2.27788e-15	0.519862	0.257	0.082	5.55346e-11	MES_4	BX942846.1
2.50892e-15	0.535245	0.836	0.542	6.11675e-11	MES_4	serf2
3.9266e-15	0.500953	0.795	0.488	9.57304e-11	MES_4	sdf4
4.1194e-15	0.619836	0.743	0.465	1.00431e-10	MES_4	sec31a
5.33401e-15	0.411575	0.298	0.106	1.30043e-10	MES_4	si:ch73-217n20.1
5.77838e-15	0.522339	0.573	0.281	1.40877e-10	MES_4	mef2ca
6.02649e-15	0.336254	0.333	0.127	1.46926e-10	MES_4	alg6
6.09496e-15	0.650253	0.538	0.272	1.48595e-10	MES_4	chn2
7.62532e-15	0.64753	0.731	0.434	1.85905e-10	MES_4	MYO9B
7.69383e-15	0.505015	0.532	0.266	1.87576e-10	MES_4	trip11
7.92843e-15	0.372986	0.433	0.185	1.93295e-10	MES_4	cnpy2
8.2208e-15	0.426358	0.462	0.206	2.00423e-10	MES_4	fam114a1
8.49804e-15	0.582577	0.877	0.632	2.07182e-10	MES_4	ssr4
8.6372e-15	0.485225	0.643	0.361	2.10575e-10	MES_4	slc31a1
9.64738e-15	0.43073	0.52	0.252	2.35203e-10	MES_4	tmem263
9.69949e-15	0.678475	0.532	0.263	2.36473e-10	MES_4	unc5b
9.92208e-15	0.302398	0.316	0.114	2.419e-10	MES_4	map3k21
1.00636e-14	0.476304	0.667	0.366	2.4535e-10	MES_4	vegfaa
1.09044e-14	0.542559	0.731	0.442	2.6585e-10	MES_4	selenom
1.59586e-14	0.484192	0.626	0.331	3.8907e-10	MES_4	ndrg3b
1.86661e-14	0.514369	0.901	0.612	4.5508e-10	MES_4	dad1
2.17736e-14	0.335995	0.228	0.07	5.30841e-10	MES_4	pxylp1
2.24201e-14	0.573406	0.216	0.065	5.46603e-10	MES_4	stc2a
2.37924e-14	0.541109	0.661	0.37	5.80059e-10	MES_4	fkbp11
2.68151e-14	0.475151	0.62	0.339	6.53752e-10	MES_4	eprs1
4.16505e-14	0.472797	0.596	0.314	1.01544e-09	MES_4	efnb1
4.3604e-14	0.393254	0.257	0.087	1.06307e-09	MES_4	lta4h
4.46759e-14	0.447136	0.327	0.127	1.0892e-09	MES_4	zgc:110339
5.68186e-14	0.437773	0.398	0.168	1.38524e-09	MES_4	wnt10a
6.09832e-14	0.418832	0.205	0.06	1.48677e-09	MES_4	CT030153.1
6.11315e-14	0.567395	0.982	0.824	1.49039e-09	MES_4	cux1a
6.71902e-14	0.338385	0.38	0.157	1.6381e-09	MES_4	CT027815.1
7.53623e-14	0.442579	0.351	0.141	1.83733e-09	MES_4	aldh1l2
7.8755e-14	0.687979	0.626	0.34	1.92005e-09	MES_4	ptbp3
9.46541e-14	0.657101	0.83	0.584	2.30767e-09	MES_4	reck
9.86634e-14	0.49584	0.678	0.395	2.40541e-09	MES_4	uggt2
9.86844e-14	0.531209	0.842	0.513	2.40593e-09	MES_4	baiap2a
1.23115e-13	0.628265	0.544	0.282	3.00154e-09	MES_4	tnfaip8l3
1.33152e-13	0.329411	0.222	0.069	3.24626e-09	MES_4	mapk8ip3
1.44608e-13	0.513386	0.801	0.525	3.52554e-09	MES_4	kcnn4
1.67115e-13	0.511928	0.819	0.541	4.07427e-09	MES_4	fkbp7
1.86188e-13	0.503204	0.877	0.621	4.53927e-09	MES_4	srgap1a
2.03794e-13	0.463081	0.386	0.168	4.96849e-09	MES_4	spag9a
2.08052e-13	0.371335	0.421	0.184	5.07231e-09	MES_4	bambib
2.33002e-13	0.657489	0.532	0.278	5.68059e-09	MES_4	atp2b1a
2.43376e-13	0.350213	0.275	0.096	5.9335e-09	MES_4	rspo2
2.67546e-13	0.64086	0.871	0.666	6.52278e-09	MES_4	calr3b
2.7605e-13	0.438503	0.251	0.085	6.73009e-09	MES_4	esr2b
3.18735e-13	0.521466	0.637	0.354	7.77077e-09	MES_4	hip1
3.19344e-13	0.470086	0.374	0.155	7.7856e-09	MES_4	jhy
4.04997e-13	0.297434	0.363	0.146	9.87383e-09	MES_4	ENSDARG00000115101
4.66137e-13	0.48955	0.737	0.462	1.13644e-08	MES_4	grb2b
5.45477e-13	0.376377	0.62	0.33	1.32987e-08	MES_4	slc7a10a
6.53759e-13	0.546457	0.977	0.803	1.59386e-08	MES_4	atp2b4
6.62663e-13	0.526885	0.754	0.484	1.61557e-08	MES_4	sec24d
9.73588e-13	0.39805	0.292	0.114	2.37361e-08	MES_4	insig1
1.04572e-12	0.416293	0.205	0.064	2.54946e-08	MES_4	cyp26a1
1.11309e-12	0.26689	0.339	0.136	2.71372e-08	MES_4	tmed3
1.41404e-12	0.389317	0.24	0.082	3.44742e-08	MES_4	slc35f1
1.74513e-12	0.554149	0.801	0.549	4.25462e-08	MES_4	sec11a
2.00854e-12	0.513027	0.901	0.653	4.89681e-08	MES_4	epha2a
2.02793e-12	0.491934	0.784	0.525	4.94409e-08	MES_4	anxa5b
2.27484e-12	0.41659	0.474	0.237	5.54606e-08	MES_4	ston2
2.38978e-12	0.386078	0.532	0.277	5.82628e-08	MES_4	vgll4b
3.21254e-12	0.573585	0.643	0.385	7.83218e-08	MES_4	fam126a
3.6906e-12	0.5863	0.778	0.508	8.99768e-08	MES_4	cdk17
4.05549e-12	0.314881	0.251	0.09	9.88729e-08	MES_4	glg1b
4.33126e-12	0.260206	0.24	0.083	1.05596e-07	MES_4	si:dkey-238c7.16
4.68174e-12	0.264015	0.205	0.066	1.14141e-07	MES_4	cramp1
4.70738e-12	0.251691	0.351	0.147	1.14766e-07	MES_4	sphk2
4.78755e-12	0.274738	0.216	0.071	1.16721e-07	MES_4	wu:fc63a07
4.89655e-12	0.392362	0.363	0.159	1.19378e-07	MES_4	tent5ba
5.35554e-12	0.339545	0.374	0.166	1.30568e-07	MES_4	tbxas1
6.08936e-12	0.494405	0.965	0.796	1.48459e-07	MES_4	gnai2a
6.44142e-12	0.332365	0.257	0.095	1.57042e-07	MES_4	mylk3
6.63604e-12	0.376297	0.784	0.489	1.61787e-07	MES_4	enox2
7.38329e-12	0.267332	0.456	0.214	1.80005e-07	MES_4	pbx1a
7.63328e-12	0.425086	0.327	0.135	1.86099e-07	MES_4	kcnma1a
8.13257e-12	0.483463	0.778	0.515	1.98272e-07	MES_4	si:busm1-57f23.1
8.36088e-12	0.310312	0.327	0.14	2.03838e-07	MES_4	lrrc1
8.78052e-12	0.497312	0.439	0.215	2.14069e-07	MES_4	dipk2ab
1.0758e-11	0.35842	0.257	0.098	2.62279e-07	MES_4	tmem11
1.25372e-11	0.468377	0.871	0.666	3.05658e-07	MES_4	mef2aa
1.37124e-11	0.497179	0.626	0.379	3.34308e-07	MES_4	surf4l
1.42745e-11	0.398179	0.848	0.571	3.48012e-07	MES_4	tshz2
1.53746e-11	0.325213	0.421	0.198	3.74832e-07	MES_4	sall3b
1.69783e-11	0.353569	0.404	0.191	4.1393e-07	MES_4	lrrc59
1.96627e-11	0.346119	0.439	0.219	4.79376e-07	MES_4	cyp20a1
2.15368e-11	0.359807	0.415	0.201	5.25067e-07	MES_4	triqk
2.43218e-11	0.460735	0.912	0.685	5.92966e-07	MES_4	rrbp1a
2.46167e-11	0.385259	0.503	0.263	6.00154e-07	MES_4	rassf2a
2.46887e-11	0.560246	0.415	0.207	6.01912e-07	MES_4	zgc:163030
2.6265e-11	0.291228	0.228	0.08	6.40341e-07	MES_4	herc7
3.02884e-11	0.332528	0.567	0.314	7.38431e-07	MES_4	etv5b
3.39435e-11	0.285015	0.474	0.234	8.27543e-07	MES_4	calm3a.1
4.00437e-11	0.322665	0.591	0.322	9.76264e-07	MES_4	pld7
4.18933e-11	0.333365	0.678	0.388	1.02136e-06	MES_4	supt3h
4.60945e-11	0.339876	0.304	0.129	1.12378e-06	MES_4	pkp4
4.94213e-11	0.418472	0.322	0.137	1.20489e-06	MES_4	adam15
5.14425e-11	0.44052	0.684	0.42	1.25417e-06	MES_4	ENSDARG00000012458
5.45944e-11	0.321666	0.386	0.182	1.33101e-06	MES_4	inppl1a
6.19411e-11	0.645468	0.673	0.436	1.51012e-06	MES_4	dgkh
6.50734e-11	0.307353	0.386	0.181	1.58649e-06	MES_4	AL929222.2
6.9044e-11	0.438271	0.883	0.696	1.68329e-06	MES_4	p4hb
7.10628e-11	0.504387	0.86	0.609	1.73251e-06	MES_4	fgfr1a
7.30843e-11	0.468032	0.45	0.234	1.7818e-06	MES_4	pard6gb
8.10975e-11	0.376473	0.596	0.351	1.97716e-06	MES_4	cd164
8.55011e-11	0.325796	0.456	0.22	2.08452e-06	MES_4	CU856539.2
8.93952e-11	0.379346	0.374	0.177	2.17945e-06	MES_4	scaf11
9.04577e-11	0.450958	0.655	0.4	2.20536e-06	MES_4	cox7a2a
9.12431e-11	0.321427	0.626	0.351	2.22451e-06	MES_4	hm13
9.81182e-11	0.435935	0.795	0.548	2.39212e-06	MES_4	creb3l2
1.0789e-10	0.4027	0.48	0.254	2.63035e-06	MES_4	p4ha1a
1.22204e-10	0.322435	0.363	0.167	2.97933e-06	MES_4	smc4
1.24712e-10	0.535113	0.953	0.791	3.04048e-06	MES_4	snd1
1.39915e-10	0.537104	0.357	0.168	3.41113e-06	MES_4	slc25a21
1.84326e-10	0.304291	0.216	0.079	4.49388e-06	MES_4	smarcb1b
1.89008e-10	0.264938	0.257	0.101	4.60803e-06	MES_4	cfl2
1.8955e-10	0.305443	0.392	0.191	4.62123e-06	MES_4	tmem54a
1.97294e-10	0.504416	0.76	0.499	4.81003e-06	MES_4	chst11
1.99281e-10	0.440584	0.38	0.185	4.85847e-06	MES_4	tns3.2
2.21533e-10	0.321622	0.31	0.134	5.40096e-06	MES_4	adamtsl5
2.29751e-10	0.36576	0.825	0.575	5.60133e-06	MES_4	tmed10
2.95575e-10	0.276241	0.386	0.184	7.20613e-06	MES_4	mtmr11
3.2026e-10	0.299737	0.368	0.172	7.80794e-06	MES_4	rapgef1b
3.64397e-10	0.391441	0.713	0.482	8.88399e-06	MES_4	tspan7
3.69465e-10	0.508159	0.287	0.118	9.00755e-06	MES_4	mmp11b
4.56001e-10	0.30886	0.503	0.262	1.11173e-05	MES_4	tent5bb
4.70203e-10	0.456725	0.398	0.203	1.14635e-05	MES_4	camsap3
6.15703e-10	0.520249	0.825	0.572	1.50108e-05	MES_4	calua
7.28592e-10	0.266729	0.322	0.143	1.77631e-05	MES_4	si:dkey-6f10.3
7.59826e-10	0.366323	0.503	0.276	1.85246e-05	MES_4	ssr1
7.8044e-10	0.26262	0.257	0.103	1.90271e-05	MES_4	zdhhc20a
8.51533e-10	0.295731	0.345	0.159	2.07604e-05	MES_4	fgfrl1b
8.70122e-10	0.341823	0.515	0.283	2.12136e-05	MES_4	sec13
9.62446e-10	0.352907	0.444	0.233	2.34644e-05	MES_4	fam3c
9.75506e-10	0.308758	0.287	0.125	2.37828e-05	MES_4	vstm4b
9.88214e-10	0.477433	0.795	0.577	2.40927e-05	MES_4	mibp2
1.03559e-09	0.309285	0.585	0.337	2.52476e-05	MES_4	slc23a2
1.07465e-09	0.325229	0.222	0.086	2.61999e-05	MES_4	cpne4a
1.1485e-09	0.261907	0.316	0.143	2.80005e-05	MES_4	sart3
1.21563e-09	0.42006	0.439	0.235	2.96372e-05	MES_4	BX322574.1
1.5771e-09	0.467314	0.877	0.695	3.84498e-05	MES_4	ptpn13
1.60494e-09	0.363392	0.456	0.248	3.91284e-05	MES_4	cpeb3
1.83774e-09	0.305675	0.596	0.354	4.48042e-05	MES_4	tgfbr2b
1.88462e-09	0.361315	0.62	0.369	4.59471e-05	MES_4	cers2b
2.08155e-09	0.378216	0.491	0.277	5.07483e-05	MES_4	gorasp2
2.09817e-09	0.388041	0.889	0.725	5.11535e-05	MES_4	rpl22l1
2.24103e-09	0.292109	0.427	0.224	5.46363e-05	MES_4	snx4
2.34507e-09	0.279564	0.24	0.097	5.71727e-05	MES_4	adamts12
2.53242e-09	0.351987	0.433	0.235	6.17403e-05	MES_4	acbd3
2.57728e-09	0.36059	0.643	0.404	6.2834e-05	MES_4	gnaia
2.68845e-09	0.32029	0.281	0.125	6.55445e-05	MES_4	slc35b2
2.77414e-09	0.367852	0.573	0.329	6.76335e-05	MES_4	MYO1D
2.91767e-09	0.365446	0.626	0.398	7.11328e-05	MES_4	aldoaa
2.96247e-09	0.282573	0.532	0.3	7.2225e-05	MES_4	phgdh
3.0791e-09	0.390394	0.947	0.814	7.50685e-05	MES_4	ndufa4l
3.10702e-09	0.376358	0.848	0.619	7.57492e-05	MES_4	atf4a
3.28885e-09	0.337545	0.322	0.15	8.01822e-05	MES_4	gnai2b
4.44913e-09	0.266073	0.526	0.296	0.00010847	MES_4	CABZ01058650.1
4.56892e-09	0.387971	0.673	0.429	0.00011139	MES_4	copb1
4.83928e-09	0.414538	0.433	0.231	0.000117982	MES_4	si:dkey-40c11.2
5.30063e-09	0.422289	0.825	0.603	0.000129229	MES_4	mia3
5.37078e-09	0.462342	0.62	0.395	0.00013094	MES_4	psd3l
6.10591e-09	0.305142	0.374	0.191	0.000148862	MES_4	slc35c2
6.27451e-09	0.28195	0.398	0.206	0.000152973	MES_4	slc39a13
6.30207e-09	0.27176	0.667	0.394	0.000153644	MES_4	tnika
6.49172e-09	0.332793	0.702	0.451	0.000158268	MES_4	tmed9
6.77158e-09	0.409134	0.655	0.445	0.000165091	MES_4	crtap
6.99317e-09	0.291768	0.322	0.154	0.000170493	MES_4	epb41l3b
7.01501e-09	0.377464	0.415	0.218	0.000171026	MES_4	neo1b
7.03115e-09	0.352433	0.673	0.437	0.00017142	MES_4	tspan9a
7.06375e-09	0.339074	0.275	0.125	0.000172214	MES_4	myca
7.26155e-09	0.313264	0.386	0.203	0.000177037	MES_4	calm2a
7.29129e-09	0.477589	0.38	0.199	0.000177762	MES_4	nckap5l
7.4005e-09	0.4108	0.468	0.262	0.000180424	MES_4	mxd4
8.31779e-09	0.395467	0.304	0.142	0.000202788	MES_4	raver2
9.27946e-09	0.55811	0.895	0.711	0.000226233	MES_4	msi2b
9.54702e-09	0.378944	0.784	0.552	0.000232756	MES_4	ddost
9.72921e-09	0.338642	0.544	0.323	0.000237198	MES_4	smad3a
9.78228e-09	0.308754	0.45	0.247	0.000238492	MES_4	bcl6ab
9.96555e-09	0.33031	0.462	0.254	0.00024296	MES_4	tjp2b
1.00285e-08	0.374168	0.596	0.377	0.000244496	MES_4	bmpr2a
1.08527e-08	0.321433	0.363	0.181	0.000264589	MES_4	arhgap27
1.1209e-08	0.394689	0.737	0.49	0.000273276	MES_4	lgals3b
1.12767e-08	0.407821	0.439	0.243	0.000274926	MES_4	si:dkey-101k6.5
1.14211e-08	0.275697	0.421	0.225	0.000278445	MES_4	scfd1
1.32117e-08	0.279015	0.398	0.21	0.000322101	MES_4	prrc1
1.33811e-08	0.262262	0.474	0.261	0.000326231	MES_4	cars1
1.50627e-08	0.319852	0.538	0.305	0.000367228	MES_4	wipi1
1.60214e-08	0.411138	0.661	0.444	0.000390602	MES_4	copb2
1.60414e-08	0.366626	0.836	0.597	0.000391089	MES_4	mtdha
1.73836e-08	0.264901	0.392	0.209	0.000423811	MES_4	nfkbib
2.06887e-08	0.425143	0.579	0.355	0.000504391	MES_4	ralgps2
2.20327e-08	0.470011	0.971	0.843	0.000537158	MES_4	neo1a
2.36709e-08	0.340257	0.854	0.602	0.000577096	MES_4	cox8a
2.5073e-08	0.345967	0.368	0.194	0.000611279	MES_4	gpx8
2.53971e-08	0.320953	0.579	0.361	0.000619182	MES_4	exoc6
2.96601e-08	0.256321	0.708	0.483	0.000723114	MES_4	tmod2
3.06328e-08	0.261029	0.421	0.229	0.000746828	MES_4	mob2b
3.23131e-08	0.264687	0.661	0.407	0.000787793	MES_4	si:dkeyp-19e1.3
3.30513e-08	0.276054	0.216	0.089	0.00080579	MES_4	flot2b
3.41763e-08	0.276547	0.538	0.306	0.000833219	MES_4	CU464118.1
3.41895e-08	0.439964	0.912	0.772	0.000833539	MES_4	rarga
3.48788e-08	0.312246	0.561	0.342	0.000850345	MES_4	DST
3.55971e-08	0.36809	0.515	0.31	0.000867858	MES_4	nab1b
3.67654e-08	0.608275	0.216	0.091	0.000896339	MES_4	mmp17a
3.92176e-08	0.31499	0.45	0.255	0.000956124	MES_4	ephb4b
3.96342e-08	0.335945	0.292	0.139	0.000966281	MES_4	fbxw4
4.2045e-08	0.435766	0.567	0.359	0.00102506	MES_4	met
4.81931e-08	0.282065	0.269	0.126	0.00117495	MES_4	poc1bl
4.85825e-08	0.322259	0.643	0.409	0.00118444	MES_4	nck1b
5.05987e-08	0.280451	0.596	0.376	0.0012336	MES_4	sec14l1
5.34936e-08	0.285492	0.45	0.257	0.00130417	MES_4	chd7
5.56789e-08	0.280544	0.503	0.297	0.00135745	MES_4	yif1a
5.90536e-08	0.34197	0.304	0.152	0.00143973	MES_4	dedd
5.98056e-08	0.308298	0.404	0.22	0.00145806	MES_4	lrrc8c
6.29407e-08	0.267516	0.404	0.218	0.0015345	MES_4	nupr1b
6.44757e-08	0.381805	0.62	0.407	0.00157192	MES_4	PKN2
7.16841e-08	0.353504	0.515	0.307	0.00174766	MES_4	dnajc1
7.93765e-08	0.263776	0.62	0.391	0.0019352	MES_4	galnt7
8.04332e-08	0.310165	0.351	0.18	0.00196096	MES_4	snx13
8.13733e-08	0.328931	0.509	0.302	0.00198388	MES_4	slc6a8
[truncated: 3,220 more rows]

## Sheet: Table S6B
Table S6. Mesenchymal (MES) subclusters DEGs and CellOracle infered GRNs
B. CellOracle inferred TF source and Target gene pairs in each MES subclusters
source	target	coef_mean	coef_abs	p	-logp	cluster
ebf3a	tgfbr3	-0.201284	0.201284	1.16312e-12	11.9344	MES_0
cebpd	c4b	0.188544	0.188544	8.19627e-21	20.0864	MES_0
tp63	cldna	0.153273	0.153273	1.88094e-18	17.7256	MES_0
foxp4	baiap2a	0.153073	0.153073	4.10602e-12	11.3866	MES_0
klf8	scel	0.153052	0.153052	1.17897e-15	14.9285	MES_0
dlx4a	aopep	0.149476	0.149476	1.14928e-11	10.9396	MES_0
grhl2a	tmem176l.4	0.133298	0.133298	3.84433e-18	17.4152	MES_0
rfx2	socs3a	0.128809	0.128809	7.85401e-15	14.1049	MES_0
klf8	zgc:153665	0.123307	0.123307	8.3627e-16	15.0777	MES_0
sox6	pdgfrb	-0.121784	0.121784	1.19136e-15	14.924	MES_0
runx3	jun	0.120148	0.120148	1.55031e-11	10.8096	MES_0
alx4a	ecrg4a	0.119712	0.119712	1.61673e-14	13.7914	MES_0
foxo1a	tnfaip6	-0.117533	0.117533	2.18974e-09	8.65961	MES_0
klf8	perp	0.117148	0.117148	6.40885e-16	15.1932	MES_0
foxp4	plch2a	0.11671	0.11671	1.95772e-14	13.7083	MES_0
nfixb	postnb	-0.116605	0.116605	4.16181e-20	19.3807	MES_0
klf8	ppl	0.115474	0.115474	1.50675e-14	13.822	MES_0
twist1a	socs3a	0.115444	0.115444	5.57766e-09	8.25355	MES_0
twist2	fibinb	0.114813	0.114813	4.92156e-18	17.3079	MES_0
dmrt1	lmo7a	0.113908	0.113908	4.27708e-11	10.3689	MES_0
foxp4	nectin1b	0.113457	0.113457	7.74777e-14	13.1108	MES_0
pknox2	fn1b	-0.112975	0.112975	7.00174e-15	14.1548	MES_0
trps1	cdh1	0.112828	0.112828	1.51101e-14	13.8207	MES_0
foxp4	apoeb	0.111923	0.111923	7.53675e-13	12.1228	MES_0
klf8	tnika	0.110225	0.110225	1.15085e-17	16.939	MES_0
klf8	dsc2l	0.109279	0.109279	5.0338e-17	16.2981	MES_0
tp63	cldni	0.108618	0.108618	1.44717e-12	11.8395	MES_0
elf3	znf185	0.106663	0.106663	2.35561e-19	18.6279	MES_0
elf3	dhrs13a.2	0.105851	0.105851	7.05114e-16	15.1517	MES_0
dmrt1	cldne	0.105596	0.105596	1.07311e-10	9.96936	MES_0
foxp4	socs3a	-0.10534	0.10534	5.17281e-14	13.2863	MES_0
elf3	si:ch211-157c3.4	0.104939	0.104939	5.30257e-13	12.2755	MES_0
foxp4	myh9a	0.104036	0.104036	1.68508e-14	13.7734	MES_0
foxp4	lima1a	0.103447	0.103447	2.29408e-18	17.6394	MES_0
foxp4	tfpia	0.1032	0.1032	1.50932e-13	12.8212	MES_0
foxp4	dsc2l	0.102728	0.102728	2.88298e-15	14.5402	MES_0
grhl2a	myo5b	0.101738	0.101738	7.92224e-19	18.1012	MES_0
cebpd	ccl25b	0.100577	0.100577	1.44043e-11	10.8415	MES_0
elf3	fa2h	0.100438	0.100438	2.46255e-17	16.6086	MES_0
foxp4	thy1	0.10042	0.10042	6.82275e-13	12.166	MES_0
klf8	cast	0.100211	0.100211	2.74618e-19	18.5613	MES_0
foxp4	jag1a	0.0995282	0.0995282	2.20065e-15	14.6574	MES_0
fosl1a	phlda2	0.099022	0.099022	1.38552e-09	8.85839	MES_0
runx2b	jun	-0.0989827	0.0989827	7.39844e-08	7.13086	MES_0
her6	cygb1	-0.0975398	0.0975398	2.69899e-07	6.5688	MES_0
thrab	phlda2	0.0972918	0.0972918	1.83098e-11	10.7373	MES_0
foxp4	frem2b	0.0956905	0.0956905	5.47392e-14	13.2617	MES_0
thrab	lnx1	0.0953225	0.0953225	1.80038e-11	10.7446	MES_0
runx2a	jun	0.0948613	0.0948613	4.0638e-07	6.39107	MES_0
foxp4	f3b	-0.094802	0.094802	1.61098e-12	11.7929	MES_0
nfat5b	itga6b	0.0938213	0.0938213	6.01095e-10	9.22106	MES_0
twist1a	tnfaip6	0.0937105	0.0937105	9.86252e-08	7.00601	MES_0
meox2a	ecrg4a	0.0927297	0.0927297	1.09586e-10	9.96025	MES_0
pknox2	col10a1a	-0.0924136	0.0924136	1.95817e-10	9.70815	MES_0
tbx2a	tp63	0.0918103	0.0918103	1.3462e-08	7.87089	MES_0
alx4a	c4b	-0.0917925	0.0917925	1.28025e-11	10.8927	MES_0
foxp4	pkp3a	0.0914659	0.0914659	2.75785e-12	11.5594	MES_0
hmga2	fosl1a	-0.0907049	0.0907049	2.65889e-11	10.5753	MES_0
dlx6a	ecrg4a	-0.090659	0.090659	1.46155e-11	10.8352	MES_0
hmga2	col18a1a	0.0903394	0.0903394	3.90241e-10	9.40867	MES_0
foxp1b	fosl1a	0.090333	0.090333	1.2576e-07	6.90046	MES_0
grhl2a	macc1	0.0890056	0.0890056	2.12835e-16	15.672	MES_0
foxp4	krt97	0.0883279	0.0883279	2.73044e-11	10.5638	MES_0
dlx4a	paqr5b	0.0880973	0.0880973	8.67673e-12	11.0616	MES_0
runx2a	daam1b	0.0869502	0.0869502	9.42954e-13	12.0255	MES_0
klf8	tnks1bp1	0.0862438	0.0862438	1.75198e-12	11.7565	MES_0
stat3	fosl1a	0.0859419	0.0859419	4.3108e-12	11.3654	MES_0
fosb	phlda2	-0.085836	0.085836	4.73949e-12	11.3243	MES_0
raraa	adam8a	-0.085373	0.085373	3.5404e-13	12.4509	MES_0
dlx4a	ecrg4a	-0.0846368	0.0846368	2.90677e-10	9.53659	MES_0
lef1	itgb4	0.0842347	0.0842347	3.27772e-13	12.4844	MES_0
tp63	foxp4	0.0840981	0.0840981	7.6737e-14	13.115	MES_0
her6	and1	0.0840234	0.0840234	1.35017e-10	9.86961	MES_0
runx1	daam1b	0.0834386	0.0834386	1.36803e-12	11.8639	MES_0
grhl2a	ptprub	0.082639	0.082639	5.42804e-14	13.2654	MES_0
twist2	and1	-0.0825055	0.0825055	3.7212e-09	8.42932	MES_0
dmrt1	ppl	0.0822219	0.0822219	3.831e-11	10.4167	MES_0
nr4a1	itgb4	0.0821137	0.0821137	6.94674e-12	11.1582	MES_0
foxp1b	eppk1	0.0811515	0.0811515	4.51347e-14	13.3455	MES_0
egr1	ccn2a	0.0811098	0.0811098	3.02471e-10	9.51932	MES_0
sox6	col18a1a	-0.0808268	0.0808268	2.71744e-07	6.56584	MES_0
barhl1a	aopep	0.0800389	0.0800389	7.91087e-10	9.10178	MES_0
ches1	itga6b	0.0799384	0.0799384	1.18062e-11	10.9279	MES_0
elf3	apoeb	-0.0797689	0.0797689	6.98485e-14	13.1558	MES_0
elf3	baiap2a	0.0796978	0.0796978	9.53018e-15	14.0209	MES_0
sox6	fn1b	0.0796941	0.0796941	1.16048e-09	8.93536	MES_0
her6	htra1a	0.0795625	0.0795625	1.56912e-12	11.8043	MES_0
dlx4a	krt97	0.0793684	0.0793684	2.92641e-07	6.53367	MES_0
cux1a	paqr5b	-0.0792617	0.0792617	1.52322e-14	13.8172	MES_0
im:7142702	cygb1	-0.0789634	0.0789634	6.31401e-10	9.19969	MES_0
pknox2	cdh1	-0.078874	0.078874	6.97577e-10	9.15641	MES_0
bach2b	enam	0.0787857	0.0787857	9.30835e-18	17.0311	MES_0
foxo1b	cldne	0.0786892	0.0786892	1.45374e-09	8.83751	MES_0
fosb	ccn1	0.0784567	0.0784567	6.04116e-14	13.2189	MES_0
foxp4	cygb1	0.0783466	0.0783466	5.75819e-08	7.23971	MES_0
sox6	tp63	0.0780356	0.0780356	8.19549e-13	12.0864	MES_0
junba	adam8a	-0.0778428	0.0778428	2.96473e-06	5.52801	MES_0
rfx2	baiap2a	0.077787	0.077787	1.87062e-10	9.72801	MES_0
mef2cb	fosl1a	-0.0776469	0.0776469	1.06156e-07	6.97406	MES_0
arid3a	macc1	0.0772628	0.0772628	3.75636e-15	14.4252	MES_0
hmga2	nrgna	0.0769931	0.0769931	1.47437e-15	14.8314	MES_0
meox2a	rgs5a	0.0767286	0.0767286	2.11029e-13	12.6757	MES_0
mafk	mdka	-0.0767087	0.0767087	2.05413e-11	10.6874	MES_0
alx4a	col10a1a	0.075894	0.075894	1.53371e-14	13.8143	MES_0
grhl2a	ptgs2a	0.0757121	0.0757121	7.1544e-18	17.1454	MES_0
her6	aebp1	0.075217	0.075217	9.16872e-12	11.0377	MES_0
stat3	cxcl18b	0.0747875	0.0747875	9.52379e-21	20.0212	MES_0
elf3	thy1	-0.0747143	0.0747143	3.32387e-12	11.4784	MES_0
meis3	and1	0.0745643	0.0745643	3.92501e-10	9.40616	MES_0
klf8	niban1a	0.0744691	0.0744691	5.25688e-15	14.2793	MES_0
hlfa	c4b	-0.0744585	0.0744585	5.44072e-08	7.26434	MES_0
mafk	jun	0.0743688	0.0743688	2.18098e-11	10.6613	MES_0
gli2b	col11a1a	0.0741378	0.0741378	1.17968e-14	13.9282	MES_0
fosab	pdgfrb	-0.0739255	0.0739255	2.66044e-13	12.575	MES_0
twist1a	c1qtnf5	0.0737454	0.0737454	2.88822e-13	12.5394	MES_0
trps1	lum	-0.0737106	0.0737106	1.79431e-14	13.7461	MES_0
dlx4a	nedd9	-0.0736505	0.0736505	5.50517e-17	16.2592	MES_0
mafk	rgs5a	-0.0734393	0.0734393	1.97863e-10	9.70364	MES_0
runx3	ogfrl2	0.0732635	0.0732635	1.63869e-17	16.7855	MES_0
runx2a	adam8a	0.0727745	0.0727745	2.96738e-12	11.5276	MES_0
elf3	hip1rb	0.0727535	0.0727535	1.1394e-17	16.9433	MES_0
fosab	ccn1	0.0725653	0.0725653	1.43723e-13	12.8425	MES_0
sox6	col10a1a	-0.072473	0.072473	8.89733e-08	7.05074	MES_0
tp63	aqp3a	0.0724595	0.0724595	7.70874e-13	12.113	MES_0
junba	ecrg4a	-0.0724405	0.0724405	2.24318e-07	6.64914	MES_0
foxp4	pawr	0.0724054	0.0724054	3.96605e-12	11.4016	MES_0
dlx4a	rgs5a	-0.0723364	0.0723364	1.3247e-11	10.8779	MES_0
dlx6a	postnb	-0.0721485	0.0721485	2.75898e-07	6.55925	MES_0
hmga2	col11a1a	0.0721401	0.0721401	6.87795e-14	13.1625	MES_0
sox9a	socs3a	0.0720177	0.0720177	1.58751e-06	5.79928	MES_0
nfixb	krt91	0.0717468	0.0717468	1.61989e-15	14.7905	MES_0
junba	prdm1a	-0.0716134	0.0716134	2.28163e-15	14.6418	MES_0
sox6	pcolce2b	0.0716088	0.0716088	3.65838e-07	6.43671	MES_0
elf3	rhpn2	0.0714349	0.0714349	1.37792e-14	13.8608	MES_0
klf6a	vcana	0.0713431	0.0713431	2.15758e-16	15.666	MES_0
pknox2	cldna	-0.071198	0.071198	2.06e-10	9.68613	MES_0
runx1	cldni	0.071025	0.071025	1.24956e-11	10.9032	MES_0
pknox2	sfrp1b	0.0710112	0.0710112	2.3187e-10	9.63476	MES_0
atf3	phlda2	0.0709865	0.0709865	2.07953e-06	5.68203	MES_0
foxo1a	igf2b	-0.0709063	0.0709063	3.50265e-12	11.4556	MES_0
foxp1b	baiap2a	0.0708259	0.0708259	5.8641e-08	7.2318	MES_0
ches1	col18a1a	0.0706797	0.0706797	2.18191e-08	7.66116	MES_0
foxp4	jupa	0.0705861	0.0705861	5.9298e-14	13.227	MES_0
elf3	zgc:111983	0.0704149	0.0704149	7.79361e-11	10.1083	MES_0
cebpd	rbp4	0.0702807	0.0702807	3.14045e-15	14.503	MES_0
elf3	zgc:193505	0.0701475	0.0701475	2.96636e-11	10.5278	MES_0
fosb	fn1b	-0.0699473	0.0699473	3.14722e-15	14.5021	MES_0
elf3	stard14	0.069929	0.069929	2.22896e-14	13.6519	MES_0
foxp4	col10a1a	-0.0699199	0.0699199	8.42998e-09	8.07417	MES_0
dmrt1	agr1	0.0698046	0.0698046	3.61593e-09	8.44178	MES_0
sox6	sfrp1b	-0.0696393	0.0696393	1.67783e-09	8.77525	MES_0
klf8	rhpn2	0.0695489	0.0695489	1.67494e-10	9.776	MES_0
fosl1a	aqp3a	0.0695479	0.0695479	2.13393e-13	12.6708	MES_0
grhl2a	paqr5b	0.0692012	0.0692012	1.37203e-12	11.8626	MES_0
mef2cb	clic2	0.0690941	0.0690941	1.34245e-09	8.8721	MES_0
atf3	and1	-0.0687017	0.0687017	5.05066e-12	11.2967	MES_0
fosl1a	f3b	0.068513	0.068513	4.6093e-11	10.3364	MES_0
foxo1a	aspn	-0.0684611	0.0684611	3.45406e-09	8.46167	MES_0
ar	fn1a	-0.0684474	0.0684474	8.00521e-11	10.0966	MES_0
fosab	pmp22b	0.0684421	0.0684421	3.8663e-09	8.4127	MES_0
foxp4	epcam	0.0680068	0.0680068	3.12412e-11	10.5053	MES_0
foxp4	epha7	0.0678687	0.0678687	6.27509e-11	10.2024	MES_0
grhl2a	cldnb	0.067649	0.067649	1.33771e-13	12.8736	MES_0
nfic	fgfr1b	0.0675725	0.0675725	3.73421e-11	10.4278	MES_0
dmrt1	zgc:153665	0.0674469	0.0674469	3.5913e-08	7.44475	MES_0
nfic	krt94	-0.0674214	0.0674214	3.65472e-13	12.4371	MES_0
tcf7l1b	sfrp1b	0.0674065	0.0674065	1.27179e-10	9.89558	MES_0
foxp4	ptprfb	0.0673917	0.0673917	1.53007e-12	11.8153	MES_0
grhl2a	tmprss4a	0.0672754	0.0672754	6.75188e-16	15.1706	MES_0
dlx4a	tp63	0.0671288	0.0671288	6.48119e-09	8.18835	MES_0
nfixb	tnika	0.0670291	0.0670291	5.23971e-13	12.2807	MES_0
grhl2a	cldn7b	0.0668632	0.0668632	2.85181e-14	13.5449	MES_0
nfic	abi3bpb	0.0667175	0.0667175	2.92916e-13	12.5333	MES_0
runx1	jun	-0.06666	0.06666	1.97684e-08	7.70403	MES_0
grhl2a	malb	0.0664463	0.0664463	3.55443e-13	12.4492	MES_0
fosb	f3b	0.0664107	0.0664107	9.09906e-14	13.041	MES_0
raraa	krt94	-0.0662806	0.0662806	1.72417e-17	16.7634	MES_0
klf7a	vcana	-0.0658532	0.0658532	1.74033e-11	10.7594	MES_0
rbpjb	lnx1	0.065699	0.065699	2.96737e-10	9.52763	MES_0
pknox2	jun	-0.0656032	0.0656032	4.15158e-06	5.38179	MES_0
klf7a	ccn2a	-0.0655995	0.0655995	9.27863e-11	10.0325	MES_0
tp63	notch3	0.0655563	0.0655563	4.63998e-10	9.33348	MES_0
klf8	nrg1	0.0652188	0.0652188	1.60639e-11	10.7941	MES_0
foxo1a	pdlim7	0.0650875	0.0650875	5.69342e-12	11.2446	MES_0
nr4a3	col11a1a	-0.0649512	0.0649512	1.24202e-14	13.9059	MES_0
jun	klf6a	0.0647729	0.0647729	5.27723e-15	14.2776	MES_0
dlx6a	ucmaa	-0.0647358	0.0647358	1.08188e-10	9.96582	MES_0
dlx4a	scel	0.0646085	0.0646085	3.65348e-07	6.43729	MES_0
klf7a	chst11	0.0645219	0.0645219	8.05322e-14	13.094	MES_0
foxo1a	abi3bpb	0.0644789	0.0644789	1.06273e-11	10.9736	MES_0
foxp4	nuggc.3	0.0644113	0.0644113	3.82931e-13	12.4169	MES_0
fosb	si:busm1-57f23.1	-0.0643747	0.0643747	2.23631e-14	13.6505	MES_0
grhl2a	nrg1	0.0643688	0.0643688	4.70168e-13	12.3277	MES_0
creb5b	dkk3b	-0.0637451	0.0637451	1.45495e-08	7.83715	MES_0
dlx4a	col11a1a	-0.0636591	0.0636591	2.56248e-08	7.59134	MES_0
lmx1ba	itga6b	-0.0636513	0.0636513	1.31693e-08	7.88044	MES_0
runx1	fgfrl1a	0.0635162	0.0635162	4.61953e-14	13.3354	MES_0
elf3	evpla	0.0635127	0.0635127	1.68486e-18	17.7734	MES_0
nfic	ntn1a	0.0632864	0.0632864	8.14112e-15	14.0893	MES_0
cebpd	itga5	-0.0632274	0.0632274	6.98594e-13	12.1558	MES_0
ches1	dkk3b	-0.0632098	0.0632098	7.97653e-09	8.09819	MES_0
nfixb	mmp2	-0.0631577	0.0631577	3.73807e-13	12.4274	MES_0
tp63	bcam	0.0631273	0.0631273	2.13469e-14	13.6707	MES_0
foxp4	alpi.1	0.0630946	0.0630946	1.75664e-14	13.7553	MES_0
foxp4	frem2a	0.0630885	0.0630885	4.3143e-12	11.3651	MES_0
meox2a	itga6b	0.0630197	0.0630197	4.09192e-07	6.38807	MES_0
fosab	bmpr1ba	-0.0629313	0.0629313	1.84362e-12	11.7343	MES_0
mafk	tnfaip6	-0.0629301	0.0629301	1.57559e-07	6.80256	MES_0
ebf3a	ccn2a	-0.0628701	0.0628701	1.11774e-07	6.95166	MES_0
klf6a	abi3bpb	-0.0627253	0.0627253	3.62419e-17	16.4408	MES_0
meis3	itga6b	0.0627067	0.0627067	1.59621e-06	5.79691	MES_0
mef2cb	adam8a	0.0626985	0.0626985	4.51479e-12	11.3454	MES_0
fosb	bmpr1ba	-0.0626285	0.0626285	3.60939e-13	12.4426	MES_0
bhlhe40	gli2a	-0.062574	0.062574	5.31053e-18	17.2749	MES_0
hlfa	paqr5b	0.0622991	0.0622991	4.34929e-10	9.36158	MES_0
hmga2	cldni	0.0621679	0.0621679	1.06277e-10	9.97356	MES_0
klf8	col11a1b	-0.0620061	0.0620061	9.72411e-17	16.0122	MES_0
mitfb	fosl1a	-0.061958	0.061958	6.95916e-11	10.1574	MES_0
arid3a	cldni	-0.0619491	0.0619491	8.09883e-11	10.0916	MES_0
nr4a1	ccl25b	0.0619231	0.0619231	7.29305e-12	11.1371	MES_0
foxp4	kazald3	-0.0618745	0.0618745	6.11249e-18	17.2138	MES_0
dlx6a	itga6b	-0.0616846	0.0616846	7.01909e-08	7.15372	MES_0
dlx4a	fstl1b	-0.0616156	0.0616156	2.60781e-13	12.5837	MES_0
runx1	myh9a	0.0616101	0.0616101	3.46433e-10	9.46038	MES_0
dmrt1	cdh1	0.0615463	0.0615463	6.06166e-11	10.2174	MES_0
fosab	mdka	-0.0615243	0.0615243	1.27346e-09	8.89501	MES_0
runx2a	vcana	0.0613992	0.0613992	1.62318e-14	13.7896	MES_0
nr4a1	fn1a	-0.0613446	0.0613446	5.32494e-17	16.2737	MES_0
dlx6a	col11a1a	-0.0612403	0.0612403	1.75869e-13	12.7548	MES_0
foxo1a	dkk3b	-0.0612341	0.0612341	1.39971e-07	6.85396	MES_0
foxp4	sema4ba	0.0610062	0.0610062	4.4654e-12	11.3501	MES_0
raraa	celf2	0.0608102	0.0608102	3.35213e-10	9.47468	MES_0
dlx4a	entpd1	-0.060791	0.060791	1.12126e-10	9.95029	MES_0
klf8	ccn1	-0.060655	0.060655	1.53218e-14	13.8147	MES_0
tbx2a	cldna	0.0606447	0.0606447	9.38499e-09	8.02757	MES_0
sox6	cdh1	0.0605275	0.0605275	1.21158e-06	5.91665	MES_0
dlx6a	plod2	0.0604492	0.0604492	6.94628e-06	5.15825	MES_0
bach2b	cygb1	-0.0601707	0.0601707	8.76756e-07	6.05712	MES_0
jun	cxcl18b	-0.0601239	0.0601239	1.34935e-11	10.8699	MES_0
twist1a	klf6a	0.0600249	0.0600249	1.98431e-10	9.70239	MES_0
jdp2b	cygb1	0.0600143	0.0600143	5.98499e-13	12.2229	MES_0
klf7a	sparc	0.0599083	0.0599083	3.21632e-11	10.4926	MES_0
twist2	c1qtnf5	-0.0598322	0.0598322	4.6216e-12	11.3352	MES_0
nfic	tp63	-0.0598269	0.0598269	6.13556e-08	7.21215	MES_0
lef1	sfrp1b	-0.0597601	0.0597601	1.86912e-09	8.72836	MES_0
klf8	plcd1a	0.0596861	0.0596861	8.43043e-16	15.0742	MES_0
klf12a	thbs4b	0.0596831	0.0596831	3.25252e-07	6.48778	MES_0
foxo1b	fn1b	-0.0596801	0.0596801	2.31312e-11	10.6358	MES_0
lef1	bcam	0.0596023	0.0596023	5.03434e-13	12.2981	MES_0
her6	col1a2	0.0594204	0.0594204	6.91028e-20	19.1605	MES_0
klf8	cldn7b	0.0594111	0.0594111	2.87088e-14	13.542	MES_0
fosl1a	abi3bpb	0.0593315	0.0593315	8.10708e-11	10.0911	MES_0
elf3	gmds	0.0593256	0.0593256	2.52296e-18	17.5981	MES_0
mafk	cxcl12a	0.0593163	0.0593163	1.9674e-09	8.70611	MES_0
foxp4	scel	0.0593118	0.0593118	1.95293e-05	4.70931	MES_0
rxraa	nectin1b	0.0592668	0.0592668	1.0557e-15	14.9765	MES_0
rfx2	cldni	0.0591597	0.0591597	3.93855e-09	8.40466	MES_0
foxp1b	krt97	0.0589912	0.0589912	7.70924e-08	7.11299	MES_0
foxp4	rflna	0.0588342	0.0588342	8.50876e-16	15.0701	MES_0
nr4a1	ecrg4a	-0.058817	0.058817	4.77597e-10	9.32094	MES_0
foxo1b	dhrs13a.2	0.0587686	0.0587686	4.91805e-09	8.30821	MES_0
thrab	col18a1a	-0.058747	0.058747	7.28278e-07	6.1377	MES_0
tp63	notch1a	0.0586929	0.0586929	1.82128e-18	17.7396	MES_0
dmrt1	baiap2l1a	0.0586857	0.0586857	4.83535e-12	11.3156	MES_0
sox6	ptgs2a	0.0586624	0.0586624	1.77132e-10	9.7517	MES_0
mef2cb	daam1b	0.0586457	0.0586457	5.12939e-11	10.2899	MES_0
elf3	tgm5l	0.058642	0.058642	3.48543e-16	15.4577	MES_0
raraa	col18a1a	0.0586352	0.0586352	1.25837e-06	5.90019	MES_0
gli2b	dachd	0.058547	0.058547	1.08229e-14	13.9657	MES_0
tcf7l1b	lnx1	0.0584844	0.0584844	1.0525e-05	4.97778	MES_0
sox9a	fosl1a	0.0584191	0.0584191	1.48545e-10	9.82814	MES_0
raraa	tp63	-0.0583995	0.0583995	1.81694e-10	9.74066	MES_0
jdp2b	nt5e	-0.0583688	0.0583688	2.60297e-14	13.5845	MES_0
foxo1a	postnb	0.0583629	0.0583629	9.87274e-08	7.00556	MES_0
foxo1a	fgfr1b	0.0583506	0.0583506	5.06385e-08	7.29552	MES_0
twist2	si:ch211-243a20.3	0.0583323	0.0583323	5.96672e-16	15.2243	MES_0
heyl	and1	-0.0583282	0.0583282	1.78367e-06	5.74868	MES_0
creb3l3b	cxcl12a	0.0583123	0.0583123	1.22924e-15	14.9104	MES_0
atf3	cldni	0.0582403	0.0582403	1.30592e-15	14.8841	MES_0
gli2a	enam	0.0581854	0.0581854	2.19829e-10	9.65791	MES_0
lmx1ba	paqr5b	0.0581622	0.0581622	3.7074e-13	12.4309	MES_0
cux1a	cxcl18b	-0.058114	0.058114	1.6973e-11	10.7702	MES_0
fosb	ccl25b	0.0580824	0.0580824	6.87682e-11	10.1626	MES_0
klf12a	col11a1b	-0.0580703	0.0580703	9.50193e-19	18.0222	MES_0
dlx4a	si:busm1-57f23.1	0.0580266	0.0580266	2.54195e-12	11.5948	MES_0
ebf3a	col11a1a	-0.0580177	0.0580177	9.35474e-13	12.029	MES_0
trps1	olfml2ba	-0.0580141	0.0580141	2.21687e-16	15.6543	MES_0
cebpd	krt94	-0.0579135	0.0579135	2.7115e-08	7.56679	MES_0
fosb	and1	0.0577316	0.0577316	1.72152e-10	9.76409	MES_0
dlx4a	abi3bpb	-0.0576845	0.0576845	3.99358e-14	13.3986	MES_0
jun	nedd9	-0.0576187	0.0576187	9.50817e-15	14.0219	MES_0
dlx4a	ucmaa	-0.0576187	0.0576187	4.1023e-10	9.38697	MES_0
dlx6a	krt97	0.0574965	0.0574965	3.06178e-09	8.51403	MES_0
twist1a	cx43	0.0574006	0.0574006	7.08225e-13	12.1498	MES_0
grhl2a	znf185	0.0573307	0.0573307	3.56073e-08	7.44846	MES_0
nr4a1	cldni	0.0572532	0.0572532	3.89171e-12	11.4099	MES_0
arid3a	tnks1bp1	0.0572474	0.0572474	1.02844e-12	11.9878	MES_0
pknox2	smoc1	0.0571098	0.0571098	5.71696e-12	11.2428	MES_0
tcf7l2	dkk3b	-0.0570886	0.0570886	2.83122e-08	7.54803	MES_0
klf8	mhc1zba	0.0569628	0.0569628	2.11207e-15	14.6753	MES_0
klf6a	f3b	-0.0569182	0.0569182	4.4837e-10	9.34836	MES_0
jdp2b	fa2h	-0.0567588	0.0567588	8.31822e-07	6.07997	MES_0
foxp1b	plch2a	0.0566253	0.0566253	1.47126e-10	9.83231	MES_0
foxp4	f5	0.0565478	0.0565478	5.63646e-11	10.249	MES_0
dlx4a	dkk3b	0.05651	0.05651	1.57011e-06	5.80407	MES_0
klf8	evpla	0.0564705	0.0564705	6.7538e-17	16.1705	MES_0
nkx3-1	hsd17b12a	0.0563841	0.0563841	3.28618e-12	11.4833	MES_0
junba	rbp4	0.0563839	0.0563839	4.16661e-13	12.3802	MES_0
foxo1b	si:ch211-157c3.4	0.0563725	0.0563725	2.15169e-05	4.66722	MES_0
nfic	cxcl12a	0.0563277	0.0563277	9.85409e-09	8.00638	MES_0
mef2cb	col10a1a	-0.0563097	0.0563097	8.92428e-08	7.04943	MES_0
twist2	krt18a.1	-0.0562201	0.0562201	4.55106e-10	9.34189	MES_0
klf8	epcam	0.0561482	0.0561482	4.40479e-11	10.3561	MES_0
jun	and1	-0.0561313	0.0561313	5.93224e-10	9.22678	MES_0
bach2b	lum	0.0561273	0.0561273	2.00748e-13	12.6973	MES_0
hmga2	lamb1a	0.0561087	0.0561087	6.09139e-13	12.2153	MES_0
egr1	col18a1a	0.0560519	0.0560519	2.23754e-06	5.65023	MES_0
nr4a3	and2	-0.0560357	0.0560357	8.27936e-14	13.082	MES_0
foxo1a	rbms3	0.0557732	0.0557732	3.56729e-15	14.4477	MES_0
mafk	cxcl18b	0.0556747	0.0556747	2.51638e-14	13.5992	MES_0
creb5b	fstl1b	0.0556364	0.0556364	3.86696e-15	14.4126	MES_0
pknox2	dsc2l	-0.0556133	0.0556133	2.48971e-16	15.6039	MES_0
runx3	daam1b	0.0556073	0.0556073	9.02011e-11	10.0448	MES_0
fosb	fosab	0.0555184	0.0555184	2.85502e-13	12.5444	MES_0
dlx6a	aopep	0.0554688	0.0554688	1.2483e-05	4.90368	MES_0
mafk	stat3	0.055453	0.055453	2.2522e-13	12.6474	MES_0
pbx1a	thbs4b	0.0553138	0.0553138	1.08052e-11	10.9664	MES_0
cebpd	col10a1a	-0.0552081	0.0552081	7.2663e-13	12.1387	MES_0
nr4a1	ptgdsb.1	0.0551572	0.0551572	1.07751e-15	14.9676	MES_0
hmga2	zgc:153665	-0.0551433	0.0551433	1.01462e-14	13.9937	MES_0
stat3	rbp4	0.0551075	0.0551075	3.76131e-14	13.4247	MES_0
twist2	htra1a	0.0550334	0.0550334	5.65829e-11	10.2473	MES_0
hnf4g	ecrg4a	-0.0550059	0.0550059	3.57211e-05	4.44707	MES_0
lmx1ba	scel	0.0549719	0.0549719	5.05647e-08	7.29615	MES_0
klf8	zgc:193505	0.0547742	0.0547742	4.115e-08	7.38563	MES_0
nfixb	tp63	0.054705	0.054705	7.31649e-10	9.1357	MES_0
pknox2	fibinb	0.0546925	0.0546925	1.28981e-07	6.88947	MES_0
bach2b	cldna	0.0546874	0.0546874	1.63294e-07	6.78703	MES_0
bhlhe40	and1	-0.0546189	0.0546189	1.05604e-06	5.97632	MES_0
foxo1b	lmo7a	0.054392	0.054392	4.9187e-09	8.30815	MES_0
creb3l3b	entpd1	0.0543899	0.0543899	8.18715e-17	16.0869	MES_0
klf8	serpinb1l4	0.0543397	0.0543397	3.78525e-11	10.4219	MES_0
foxp4	abi3bpb	-0.0542979	0.0542979	1.07683e-10	9.96785	MES_0
jdp2b	ecrg4a	-0.0542599	0.0542599	1.28114e-06	5.8924	MES_0
tp63	abi3bpb	-0.0542108	0.0542108	1.32019e-09	8.87936	MES_0
foxo1b	zgc:111983	0.0541926	0.0541926	1.87332e-09	8.72739	MES_0
klf8	ugt8	0.0541709	0.0541709	1.81921e-16	15.7401	MES_0
hmga2	sparc	0.0541602	0.0541602	9.81676e-14	13.008	MES_0
meis3	tp63	0.0540442	0.0540442	1.66342e-11	10.779	MES_0
ar	cygb1	-0.0539727	0.0539727	7.26813e-10	9.13858	MES_0
dlx6a	kazald3	-0.0539104	0.0539104	3.35729e-12	11.474	MES_0
trps1	jupa	0.0538806	0.0538806	1.78697e-12	11.7479	MES_0
foxo1a	ckba	-0.0537627	0.0537627	3.93943e-07	6.40457	MES_0
cux1a	dsc2l	0.053749	0.053749	1.37092e-10	9.86299	MES_0
foxo1b	agr1	0.0537339	0.0537339	1.84395e-10	9.73425	MES_0
klf8	spns2	0.0536927	0.0536927	4.13649e-13	12.3834	MES_0
grhl2a	sfrp1b	-0.0536721	0.0536721	1.11001e-08	7.95467	MES_0
klf7a	thbs4b	0.0536497	0.0536497	1.18604e-10	9.9259	MES_0
fosl1a	ccn1	0.0535221	0.0535221	4.35784e-11	10.3607	MES_0
bach2b	rgs5a	0.0535173	0.0535173	5.23966e-08	7.2807	MES_0
hlfa	aebp1	-0.053417	0.053417	9.68536e-10	9.01388	MES_0
runx1	enam	0.0533662	0.0533662	2.62256e-11	10.5813	MES_0
mef2cb	slit3	-0.0532805	0.0532805	7.94727e-13	12.0998	MES_0
ebf1b	jun	0.0532535	0.0532535	6.36871e-08	7.19595	MES_0
jdp2b	mdka	0.0531914	0.0531914	8.45013e-12	11.0731	MES_0
gfi1b	tp63	0.0531342	0.0531342	1.25923e-12	11.8999	MES_0
twist2	aebp1	0.0530998	0.0530998	1.18243e-11	10.9272	MES_0
fosab	fosb	0.0530048	0.0530048	1.91932e-16	15.7169	MES_0
pknox2	tenm3	0.0529124	0.0529124	2.26842e-16	15.6443	MES_0
fosab	aqp3a	0.052906	0.052906	2.25433e-11	10.647	MES_0
klf12a	itgb4	0.05283	0.05283	6.27112e-08	7.20265	MES_0
klf8	foxo1b	0.0527656	0.0527656	1.16419e-17	16.934	MES_0
fosl1a	bmpr1ba	-0.0527456	0.0527456	1.24385e-10	9.90523	MES_0
wt1b	col5a3b	-0.0526998	0.0526998	2.43059e-13	12.6143	MES_0
elf3	mhc2dab	0.0526519	0.0526519	2.05757e-18	17.6866	MES_0
jun	phlda2	0.0525819	0.0525819	3.5171e-11	10.4538	MES_0
tcf7l2	tnika	0.0525639	0.0525639	1.8475e-12	11.7334	MES_0
runx3	myo5b	0.0525253	0.0525253	3.63899e-11	10.439	MES_0
dlx4a	cldna	0.0525047	0.0525047	4.47426e-10	9.34928	MES_0
dlx4a	lmo7a	0.052378	0.052378	5.43308e-11	10.265	MES_0
klf8	ano1	0.0522723	0.0522723	1.29452e-13	12.8879	MES_0
raraa	tenm3	0.0522267	0.0522267	9.48834e-10	9.02281	MES_0
mafk	ntn1a	0.052221	0.052221	3.35886e-11	10.4738	MES_0
egr1	tph1b	-0.0521796	0.0521796	3.74411e-09	8.42665	MES_0
sox6	npr1a	-0.0520768	0.0520768	5.40716e-14	13.267	MES_0
klf7a	rfx2	-0.0520009	0.0520009	9.83443e-10	9.00725	MES_0
her6	sfrp1b	0.0519746	0.0519746	3.0117e-13	12.5212	MES_0
nkx3-1	si:ch211-79k12.1	0.0519388	0.0519388	5.57058e-18	17.2541	MES_0
foxp1b	grhl2a	0.0519014	0.0519014	3.34948e-16	15.475	MES_0
runx3	zgc:193505	0.0518779	0.0518779	3.29902e-09	8.48161	MES_0
mafk	htra1a	-0.0518771	0.0518771	3.50303e-07	6.45556	MES_0
foxp1b	serpinb1l4	0.0518045	0.0518045	2.65836e-15	14.5754	MES_0
foxp4	fstl1b	-0.0516745	0.0516745	6.13111e-11	10.2125	MES_0
twist2	lum	0.051596	0.051596	4.78102e-11	10.3205	MES_0
klf8	ezra	0.0515776	0.0515776	1.14876e-19	18.9398	MES_0
nfixb	krt94	0.0515763	0.0515763	1.30622e-09	8.88398	MES_0
foxo1a	sparc	-0.0515626	0.0515626	9.36317e-10	9.02858	MES_0
klf8	stard14	0.0515011	0.0515011	1.4469e-08	7.83956	MES_0
nr4a3	macrod2	0.0514956	0.0514956	1.03198e-13	12.9863	MES_0
klf8	jupa	0.0514799	0.0514799	2.65332e-12	11.5762	MES_0
pknox2	aebp1	0.0513673	0.0513673	3.23057e-13	12.4907	MES_0
nfic	wif1	0.051367	0.051367	1.70795e-11	10.7675	MES_0
jdp2b	pdlim7	-0.0513106	0.0513106	1.86212e-13	12.73	MES_0
gli2a	col11a1a	0.0513054	0.0513054	3.7759e-10	9.42298	MES_0
klf2a	fa2h	0.0512555	0.0512555	8.06755e-05	4.09326	MES_0
pknox2	eppk1	-0.0511811	0.0511811	2.34729e-12	11.6294	MES_0
dlx6a	col10a1a	-0.0511735	0.0511735	7.37411e-08	7.13229	MES_0
foxp4	trps1	0.0510708	0.0510708	5.56028e-12	11.2549	MES_0
jun	dkk3b	0.0510403	0.0510403	8.11293e-10	9.09082	MES_0
fosl1a	tnika	0.0509762	0.0509762	1.77219e-14	13.7515	MES_0
twist2	bhmt	0.0509423	0.0509423	2.16544e-13	12.6645	MES_0
hnf4g	alpi.1	0.0509404	0.0509404	7.47675e-10	9.12629	MES_0
hmga2	kazald3	0.0509362	0.0509362	9.97386e-12	11.0011	MES_0
gli2b	c1qtnf5	-0.0509221	0.0509221	1.93449e-13	12.7134	MES_0
meis3	fn1b	0.0508952	0.0508952	3.09049e-09	8.50997	MES_0
rxraa	tp63	0.0508058	0.0508058	5.88831e-09	8.23001	MES_0
foxp4	notch3	0.050799	0.050799	1.13993e-10	9.94312	MES_0
barhl1a	dkk3b	0.0507632	0.0507632	3.07052e-08	7.51279	MES_0
pknox2	slit3	-0.0507596	0.0507596	4.33723e-10	9.36279	MES_0
jun	adam8a	0.0507523	0.0507523	6.30267e-10	9.20048	MES_0
bhlhe40	itgb4	0.0507116	0.0507116	1.27788e-09	8.89351	MES_0
pknox2	pkp3a	-0.0506753	0.0506753	8.9508e-16	15.0481	MES_0
foxp4	pfn1	0.0506557	0.0506557	1.1259e-14	13.9485	MES_0
fosab	ephb2b	-0.0505029	0.0505029	3.49325e-10	9.45677	MES_0
dlx4a	hmcn1	-0.0504892	0.0504892	5.56879e-12	11.2542	MES_0
alx4a	ccn1	-0.0504826	0.0504826	2.0747e-15	14.683	MES_0
klf12a	abi3bpb	0.0504502	0.0504502	4.05538e-09	8.39197	MES_0
cebpd	arhgef1b	-0.0504474	0.0504474	5.51888e-15	14.2581	MES_0
grhl2a	si:ch211-157c3.4	0.0504319	0.0504319	1.62889e-08	7.78811	MES_0
dlx4a	perp	0.0503821	0.0503821	9.86227e-12	11.006	MES_0
pknox2	apoeb	-0.050355	0.050355	4.12593e-13	12.3845	MES_0
mybl1	tgfbr3	-0.0503485	0.0503485	1.52332e-08	7.81721	MES_0
klf8	hsd17b12a	0.0503434	0.0503434	3.5076e-10	9.45499	MES_0
dmrt1	zgc:111983	0.0503043	0.0503043	1.04601e-10	9.98046	MES_0
foxp4	igfbp1a	0.0501062	0.0501062	3.05788e-16	15.5146	MES_0
dlx6a	tenm3	-0.0500148	0.0500148	2.93553e-11	10.5323	MES_0
klf6a	si:busm1-57f23.1	0.0500036	0.0500036	2.55485e-08	7.59263	MES_0
tcf7l1b	itgb4	0.0500019	0.0500019	1.67671e-09	8.77554	MES_0
runx1	pcdh7b	0.0499931	0.0499931	7.72183e-18	17.1123	MES_0
rarab	pdgfrb	-0.0499811	0.0499811	7.0357e-17	16.1527	MES_0
ar	serpine1	-0.0499414	0.0499414	4.17863e-12	11.379	MES_0
heyl	itgb4	-0.0498751	0.0498751	2.93815e-10	9.53193	MES_0
creb5b	entpd1	0.0498206	0.0498206	1.48192e-07	6.82918	MES_0
jun	aspn	0.0497789	0.0497789	1.73096e-09	8.76171	MES_0
rarab	rbp4	-0.0497566	0.0497566	7.541e-13	12.1226	MES_0
foxo3b	myo5b	0.049612	0.049612	4.15586e-13	12.3813	MES_0
mafk	rbp4	0.0495253	0.0495253	2.71254e-13	12.5666	MES_0
klf8	itgb4	-0.049433	0.049433	6.0656e-06	5.21713	MES_0
lmx1ba	itgb4	-0.0494157	0.0494157	2.08434e-09	8.68103	MES_0
elf3	tmprss4a	0.0493891	0.0493891	2.19563e-14	13.6584	MES_0
twist2	col5a2a	0.0493824	0.0493824	2.6596e-13	12.5752	MES_0
foxp4	krt93	0.0493167	0.0493167	6.60944e-12	11.1798	MES_0
klf2a	jdp2b	0.0492977	0.0492977	1.00653e-13	12.9972	MES_0
fosl1a	sdc4	0.049175	0.049175	4.04276e-13	12.3933	MES_0
jdp2b	klf12a	-0.0491537	0.0491537	3.47121e-13	12.4595	MES_0
nfixb	cxadr	0.049137	0.049137	2.62354e-13	12.5811	MES_0
dlx4a	tenm3	-0.0490155	0.0490155	6.81282e-11	10.1667	MES_0
foxo1a	hmcn1	0.048967	0.048967	1.78141e-11	10.7492	MES_0
nr1d2a	eppk1	-0.0489548	0.0489548	9.4088e-13	12.0265	MES_0
rfx3	c4b	-0.0489438	0.0489438	9.85761e-12	11.0062	MES_0
runx1	robo1	-0.0488977	0.0488977	2.76087e-14	13.559	MES_0
ches1	numbl	0.0488976	0.0488976	9.7008e-19	18.0132	MES_0
klf7a	rbp4	-0.0488818	0.0488818	1.81426e-10	9.7413	MES_0
creb3l3b	ccn1	0.0488571	0.0488571	6.10437e-13	12.2144	MES_0
elf3	tfpia	-0.0487875	0.0487875	6.5318e-13	12.185	MES_0
tcf7l1b	socs3a	0.0487696	0.0487696	5.35102e-12	11.2716	MES_0
klf12a	rcn3	-0.0487508	0.0487508	9.13144e-16	15.0395	MES_0
alx4a	nfatc1	-0.0487254	0.0487254	8.33721e-17	16.079	MES_0
trps1	lmna	0.0486102	0.0486102	4.37305e-11	10.3592	MES_0
klf12a	cyp26b1	0.0485862	0.0485862	2.79073e-08	7.55428	MES_0
klf6a	tnfrsf9a	0.0485253	0.0485253	1.66278e-14	13.7792	MES_0
nr4a1	myh9a	0.0483541	0.0483541	4.47033e-11	10.3497	MES_0
fosl1a	ccl25b	0.0483423	0.0483423	6.31005e-08	7.19997	MES_0
sox6	tmem176l.4	0.0483259	0.0483259	3.21787e-09	8.49243	MES_0
foxp4	lmo7a	0.0482887	0.0482887	2.95983e-08	7.52873	MES_0
lef1	alpi.1	0.0482321	0.0482321	1.17511e-12	11.9299	MES_0
sox6	tnfrsf18	0.0482227	0.0482227	1.58384e-12	11.8003	MES_0
jun	mdka	-0.0482061	0.0482061	9.74007e-11	10.0114	MES_0
meox2a	thbs4b	0.0481999	0.0481999	5.45958e-09	8.26284	MES_0
fosl1a	tenm3	0.04815	0.04815	7.65715e-09	8.11593	MES_0
dlx4a	npr1a	-0.0481488	0.0481488	7.91878e-12	11.1013	MES_0
egr1	phlda2	-0.0481414	0.0481414	3.65581e-09	8.43702	MES_0
stat3	ccnd2a	0.0480482	0.0480482	7.34128e-14	13.1342	MES_0
bach2b	aspn	-0.0479984	0.0479984	1.95818e-13	12.7081	MES_0
raraa	nectin1b	-0.0479593	0.0479593	6.99731e-08	7.15507	MES_0
mafk	cygb1	-0.0478792	0.0478792	7.88597e-06	5.10314	MES_0
nfixa	krt18a.1	-0.047876	0.047876	1.27202e-10	9.89551	MES_0
foxo1b	myo5b	0.0478379	0.0478379	3.32233e-14	13.4786	MES_0
meis3	apoeb	0.0478051	0.0478051	1.26084e-11	10.8993	MES_0
klf6a	krt18a.1	0.0477937	0.0477937	1.49174e-14	13.8263	MES_0
rarab	ecrg4a	0.0477692	0.0477692	4.40179e-08	7.35637	MES_0
foxp4	aqp3a	0.0477183	0.0477183	2.11752e-09	8.67417	MES_0
gli2a	cxcl12a	-0.04762	0.04762	8.28932e-08	7.08148	MES_0
nr4a3	macc1	0.047597	0.047597	4.00268e-09	8.39765	MES_0
creb5b	slit3	0.0475818	0.0475818	7.11223e-10	9.14799	MES_0
klf2a	abi3bpb	-0.047566	0.047566	4.79498e-13	12.3192	MES_0
nfic	pcolce2b	-0.0475564	0.0475564	2.96148e-09	8.52849	MES_0
klf8	tgm5l	0.0474541	0.0474541	1.11851e-10	9.95136	MES_0
twist2	serpine1	0.0474425	0.0474425	3.40429e-11	10.468	MES_0
klf8	trim16	0.0473831	0.0473831	7.31972e-17	16.1355	MES_0
ches1	nt5e	0.0473418	0.0473418	2.76731e-17	16.5579	MES_0
jun	crabp1b	-0.0473401	0.0473401	1.98369e-14	13.7025	MES_0
lhx9	paqr5b	0.0473295	0.0473295	3.11175e-11	10.507	MES_0
meis3	adam8a	0.0473027	0.0473027	1.95066e-12	11.7098	MES_0
cux1a	apoeb	0.0472785	0.0472785	5.65093e-07	6.24788	MES_0
atf3	fstl1b	-0.0471973	0.0471973	3.46518e-10	9.46027	MES_0
klf12a	f3a	0.0471281	0.0471281	2.5691e-11	10.5902	MES_0
ches1	tenm3	0.0471232	0.0471232	4.99565e-11	10.3014	MES_0
dlx6a	lum	-0.0471179	0.0471179	3.04492e-14	13.5164	MES_0
foxo1b	pard6b	0.047108	0.047108	3.2079e-17	16.4938	MES_0
hmga2	myh9a	0.0470613	0.0470613	2.73737e-09	8.56267	MES_0
nfatc1	serpine1	0.0470559	0.0470559	5.4687e-15	14.2621	MES_0
fosl1a	krt15	0.0470149	0.0470149	1.85209e-13	12.7323	MES_0
meox2a	vcana	-0.0469732	0.0469732	6.56604e-13	12.1827	MES_0
stat3	zgc:193505	0.04695	0.04695	1.56672e-11	10.805	MES_0
foxp4	col4a5	0.0468451	0.0468451	4.3908e-14	13.3575	MES_0
fosl1a	pkp3a	0.046837	0.046837	6.27656e-13	12.2023	MES_0
bach2b	cldni	0.0468126	0.0468126	1.53784e-10	9.81309	MES_0
elf3	lima1a	-0.046765	0.046765	3.5516e-12	11.4496	MES_0
pknox2	f13a1b	0.0467563	0.0467563	4.21229e-17	16.3755	MES_0
arid5b	itga9	0.0467364	0.0467364	1.30856e-13	12.8832	MES_0
foxo1a	sdc4	0.0467298	0.0467298	1.96087e-12	11.7076	MES_0
nr4a1	mdka	-0.046726	0.046726	1.62103e-10	9.79021	MES_0
grhl2a	tjp3	0.0467256	0.0467256	3.77441e-15	14.4232	MES_0
sox6	aste1a	0.0467203	0.0467203	5.76801e-08	7.23897	MES_0
dlx4a	celf2	-0.0467135	0.0467135	1.38645e-10	9.8581	MES_0
ebf3a	f3a	-0.0467113	0.0467113	1.27578e-13	12.8942	MES_0
foxo1a	dsc2l	0.0467043	0.0467043	6.79408e-09	8.16787	MES_0
pknox2	csf1a	0.0466865	0.0466865	2.20924e-15	14.6558	MES_0
rfx2	jdp2b	0.0466824	0.0466824	3.73529e-11	10.4277	MES_0
egr2b	ccn2a	0.0466728	0.0466728	1.78828e-11	10.7476	MES_0
foxp1b	dsc2l	0.0465944	0.0465944	1.32305e-10	9.87842	MES_0
gli2a	sulf1	-0.0465885	0.0465885	3.17796e-14	13.4979	MES_0
thrab	fn1a	-0.0465078	0.0465078	2.08655e-08	7.68057	MES_0
egr1	bhmt	0.0465039	0.0465039	5.34561e-11	10.272	MES_0
klf8	actn4	0.0464945	0.0464945	3.28136e-13	12.4839	MES_0
trps1	ptprub	0.0464901	0.0464901	4.84989e-10	9.31427	MES_0
rorc	tp63	0.0464697	0.0464697	6.29847e-09	8.20076	MES_0
pknox2	loxa	0.0464635	0.0464635	4.76872e-14	13.3216	MES_0
fosl1a	zgc:153665	0.0464617	0.0464617	7.86001e-11	10.1046	MES_0
dlx6a	cxcl12a	-0.0464529	0.0464529	6.85808e-08	7.1638	MES_0
gli2a	ezrb	-0.0464027	0.0464027	1.34578e-16	15.871	MES_0
runx2a	c1qtnf5	0.0463958	0.0463958	1.9572e-11	10.7084	MES_0
dlx4a	f3b	-0.0463493	0.0463493	3.64308e-11	10.4385	MES_0
meis3	alpi.1	0.0462943	0.0462943	9.91935e-11	10.0035	MES_0
junba	f3b	0.0462887	0.0462887	1.11929e-10	9.95106	MES_0
dlx4a	macc1	0.046256	0.046256	5.18754e-08	7.28504	MES_0
nr3c2	twist2	-0.0462463	0.0462463	3.51316e-11	10.4543	MES_0
klf2a	scel	0.0462103	0.0462103	3.84015e-05	4.41565	MES_0
tcf7l2	ecrg4a	-0.0461843	0.0461843	9.53179e-10	9.02083	MES_0
elf3	mhc1zba	0.0461708	0.0461708	6.21528e-14	13.2065	MES_0
dlx4a	mmp2	-0.0461528	0.0461528	1.50116e-10	9.82357	MES_0
mafk	thbs3a	-0.0461173	0.0461173	1.00167e-14	13.9993	MES_0
meis3	lama5	0.0460995	0.0460995	1.88903e-13	12.7238	MES_0
runx1	ogna	0.0460961	0.0460961	9.11572e-12	11.0402	MES_0
dmrt1	plcd1a	0.0460861	0.0460861	1.2273e-13	12.911	MES_0
pknox2	thy1	-0.046053	0.046053	1.21003e-10	9.9172	MES_0
foxo3b	igfbp5b	-0.046052	0.046052	2.69042e-12	11.5702	MES_0
nfatc1	ucmaa	0.0460173	0.0460173	4.14164e-09	8.38283	MES_0
klf2a	ccn1	-0.046014	0.046014	3.68636e-11	10.4334	MES_0
junba	si:busm1-57f23.1	-0.0460069	0.0460069	1.68535e-08	7.77331	MES_0
nfixa	tp63	0.0459719	0.0459719	1.92365e-09	8.71587	MES_0
alx4a	vcana	-0.0459686	0.0459686	2.68833e-11	10.5705	MES_0
thrab	cdh1	0.0458484	0.0458484	3.7023e-07	6.43153	MES_0
meis3	itgb4	0.0458325	0.0458325	3.01334e-11	10.521	MES_0
ches1	spock3	0.0458212	0.0458212	1.1645e-18	17.9339	MES_0
elf3	b2ml	0.0457479	0.0457479	2.06771e-12	11.6845	MES_0
nfatc1	rbms3	0.0457273	0.0457273	9.80818e-17	16.0084	MES_0
lef1	dkk3b	0.04572	0.04572	2.57259e-07	6.58963	MES_0
cux1a	loxl2a	-0.0456971	0.0456971	1.42292e-12	11.8468	MES_0
nr3c2	c1qtnf5	0.0456889	0.0456889	1.26047e-11	10.8995	MES_0
fosb	tuft1a	0.0456822	0.0456822	6.42199e-14	13.1923	MES_0
twist1a	aqp3a	-0.0456372	0.0456372	9.73524e-06	5.01165	MES_0
tbx2a	lmo7a	0.0455947	0.0455947	1.80641e-07	6.74318	MES_0
fosab	entpd1	-0.045594	0.045594	7.12578e-11	10.1472	MES_0
elf3	cd74b	0.0455923	0.0455923	1.08999e-11	10.9626	MES_0
foxp4	robo1	0.0455453	0.0455453	7.99853e-08	7.09699	MES_0
pknox2	baiap2a	-0.0454933	0.0454933	1.03784e-11	10.9839	MES_0
dlx4a	smoc1	-0.0454679	0.0454679	5.02623e-13	12.2988	MES_0
ches1	celf2	0.0454231	0.0454231	3.9532e-14	13.4031	MES_0
klf8	cldnb	0.0454212	0.0454212	1.10911e-11	10.955	MES_0
trps1	igsf3	0.0453679	0.0453679	1.25766e-16	15.9004	MES_0
dlx6a	dkk3b	0.0453636	0.0453636	1.98458e-07	6.70233	MES_0
foxo1b	sparc	-0.0453362	0.0453362	4.52379e-13	12.3445	MES_0
foxp1b	jag1a	0.0453184	0.0453184	2.06582e-08	7.68491	MES_0
hlfa	ptgdsb.1	0.0452871	0.0452871	2.58937e-11	10.5868	MES_0
tcf7l1b	daam1b	0.045274	0.045274	9.04604e-06	5.04354	MES_0
twist2	eppk1	-0.0452716	0.0452716	6.10477e-12	11.2143	MES_0
gfi1b	hbegfa	0.0452604	0.0452604	7.21425e-14	13.1418	MES_0
mef2cb	ckba	0.0452429	0.0452429	6.7826e-08	7.1686	MES_0
dlx4a	col10a1a	-0.0450822	0.0450822	6.81075e-09	8.16681	MES_0
klf6a	eno1a	0.0450765	0.0450765	1.50706e-11	10.8219	MES_0
nr4a3	elovl1a	0.0450733	0.0450733	1.01252e-14	13.9946	MES_0
tp63	ptgis	0.0450701	0.0450701	3.43948e-13	12.4635	MES_0
pbx1a	vcana	-0.0450535	0.0450535	5.39522e-12	11.268	MES_0
fosl1a	mdka	-0.0450337	0.0450337	1.83157e-06	5.73718	MES_0
rfx3	socs3a	0.0449926	0.0449926	6.9692e-05	4.15682	MES_0
klf7a	perp	-0.044973	0.044973	2.85356e-09	8.54461	MES_0
grhl2a	plcd1a	0.0449179	0.0449179	1.12947e-14	13.9471	MES_0
atf3	bcam	0.0449107	0.0449107	1.03373e-10	9.98559	MES_0
arid3a	apoeb	-0.04487	0.04487	1.44695e-09	8.83955	MES_0
mafk	thbs4b	-0.04486	0.04486	7.46555e-07	6.12694	MES_0
dmrt1	cldni	-0.0448425	0.0448425	3.0142e-09	8.52083	MES_0
grhl2a	lima1a	0.0448324	0.0448324	3.90897e-11	10.4079	MES_0
nr4a1	col11a1b	-0.0447591	0.0447591	1.00218e-09	8.99905	MES_0
dlx4a	tnika	0.0446509	0.0446509	3.41317e-07	6.46684	MES_0
mafk	frem2a	-0.0446489	0.0446489	2.55651e-15	14.5924	MES_0
cux1a	robo3	0.0446118	0.0446118	1.11997e-12	11.9508	MES_0
foxp4	enpp1	-0.0445975	0.0445975	6.308e-10	9.20011	MES_0
pknox2	entpd1	0.0445878	0.0445878	2.32786e-07	6.63304	MES_0
foxo1a	f3b	0.0445542	0.0445542	2.01443e-09	8.69585	MES_0
creb3l3b	ntn1a	0.0445284	0.0445284	1.13179e-12	11.9462	MES_0
nr4a1	ccn1	0.044493	0.044493	1.06264e-11	10.9736	MES_0
dlx4a	thbs4b	-0.0444814	0.0444814	3.21925e-08	7.49225	MES_0
rfx2	itga5	0.0444675	0.0444675	6.95204e-11	10.1579	MES_0
jun	cldni	-0.0444635	0.0444635	6.92073e-09	8.15985	MES_0
dlx4a	tmem176l.4	0.044447	0.044447	1.91102e-08	7.71874	MES_0
lhx9	itga6b	-0.0444081	0.0444081	1.95824e-09	8.70813	MES_0
pknox2	cyp26b1	-0.0444058	0.0444058	1.50746e-09	8.82175	MES_0
klf8	pdlim2	0.0443831	0.0443831	1.37554e-09	8.86153	MES_0
mafk	ccnd2a	0.0443803	0.0443803	2.01075e-11	10.6966	MES_0
foxp4	serpine1	-0.0443477	0.0443477	1.13243e-11	10.946	MES_0
thrab	nav3	0.0443438	0.0443438	1.54156e-14	13.812	MES_0
twist2	tnfaip6	-0.044338	0.044338	1.86886e-07	6.72842	MES_0
elf3	bcam	-0.0443321	0.0443321	5.33187e-10	9.27312	MES_0
lmx1ba	dkk3b	-0.0443185	0.0443185	7.22873e-07	6.14094	MES_0
creb3l3b	mdka	-0.04424	0.04424	1.09819e-10	9.95932	MES_0
runx2b	ogna	0.0442142	0.0442142	2.71692e-06	5.56592	MES_0
sox6	tenm3	-0.0442088	0.0442088	2.95708e-12	11.5291	MES_0
elf3	ccl25b	-0.044155	0.044155	2.69202e-10	9.56992	MES_0
heyl	fa2h	0.044143	0.044143	3.22906e-05	4.49092	MES_0
elf3	pdlim2	0.0441305	0.0441305	8.35433e-13	12.0781	MES_0
nr1d2a	f13a1b	0.0441115	0.0441115	3.46608e-12	11.4602	MES_0
fosb	zbtb16a	0.044074	0.044074	6.43384e-12	11.1915	MES_0
elf3	pkp3a	0.0440258	0.0440258	9.31487e-11	10.0308	MES_0
foxp4	tinagl1	0.0440135	0.0440135	7.00335e-13	12.1547	MES_0
sox6	tnfaip6	0.0439959	0.0439959	3.448e-06	5.46243	MES_0
foxp1b	thy1	0.0439896	0.0439896	4.13336e-06	5.3837	MES_0
rfx2	perp	0.0439679	0.0439679	4.49531e-06	5.34724	MES_0
hmga2	bcam	0.0438863	0.0438863	9.86677e-11	10.0058	MES_0
mafk	mmp2	-0.043884	0.043884	7.02945e-10	9.15308	MES_0
grhl2a	macrod2	0.0438822	0.0438822	4.83648e-12	11.3155	MES_0
hnf4g	rgs5a	-0.0438811	0.0438811	2.26228e-10	9.64545	MES_0
twist1a	fibinb	-0.043859	0.043859	4.33098e-09	8.36341	MES_0
fosab	fstl1b	-0.043801	0.043801	4.63266e-13	12.3342	MES_0
meox2a	hmcn1	0.0438008	0.0438008	1.47564e-11	10.831	MES_0
runx1	lama5	0.043762	0.043762	3.70873e-10	9.43077	MES_0
hmga2	serpinh1b	0.0437409	0.0437409	1.69627e-14	13.7705	MES_0
creb5b	lpar1	0.0436526	0.0436526	5.06738e-13	12.2952	MES_0
foxp4	aste1a	0.0436308	0.0436308	4.60204e-11	10.337	MES_0
runx1	vcana	-0.0436078	0.0436078	2.12286e-10	9.67308	MES_0
sox6	fstl1b	-0.0436033	0.0436033	1.75947e-08	7.75462	MES_0
alx4a	col11a1a	0.0435972	0.0435972	4.98179e-08	7.30261	MES_0
alx4a	fgfr1b	-0.043583	0.043583	1.6997e-11	10.7696	MES_0
mef2cb	entpd1	-0.0435819	0.0435819	3.30877e-10	9.48033	MES_0
klf8	f3b	-0.0435163	0.0435163	1.15963e-07	6.93568	MES_0
egr2b	col18a1a	0.0434722	0.0434722	4.033e-09	8.39437	MES_0
egr1	cxcl18b	0.0434543	0.0434543	1.75132e-08	7.75663	MES_0
foxo1b	apoeb	0.0434138	0.0434138	4.96372e-12	11.3042	MES_0
foxp1b	ptprfb	0.0434002	0.0434002	2.84309e-13	12.5462	MES_0
hlfa	rbp4	0.0433984	0.0433984	1.48075e-12	11.8295	MES_0
hmga2	lmo7a	-0.0433797	0.0433797	3.46251e-07	6.46061	MES_0
klf8	bhmt	-0.0433689	0.0433689	6.3466e-12	11.1975	MES_0
junba	abi3bpb	0.0433575	0.0433575	1.68111e-10	9.7744	MES_0
klf8	mhc1uba	0.0433572	0.0433572	3.33218e-14	13.4773	MES_0
cux1a	tnika	0.0432575	0.0432575	1.26864e-10	9.89666	MES_0
tp63	rgs5a	-0.0432262	0.0432262	1.74149e-07	6.75908	MES_0
foxo1a	sema6e	0.0432039	0.0432039	1.29546e-09	8.88758	MES_0
foxp4	cxcl12a	-0.0431702	0.0431702	4.83261e-08	7.31582	MES_0
ches1	col11a1a	0.0431689	0.0431689	1.42399e-11	10.8465	MES_0
grhl2a	nuggc.3	0.043133	0.043133	2.59693e-11	10.5855	MES_0
cebpd	pah	0.0431276	0.0431276	1.73693e-12	11.7602	MES_0
foxo1a	si:dkey-193p11.2	0.0431145	0.0431145	1.38526e-14	13.8585	MES_0
mef2cb	aspn	0.0431135	0.0431135	2.04731e-10	9.68882	MES_0
foxp4	cst14b.1	0.0430748	0.0430748	1.43899e-18	17.8419	MES_0
klf8	pard6b	0.0430618	0.0430618	5.17081e-08	7.28644	MES_0
arid5b	apoeb	0.0430517	0.0430517	5.25865e-13	12.2791	MES_0
nfatc1	cav1	0.04303	0.04303	6.83116e-16	15.1655	MES_0
fosb	cldna	-0.0430009	0.0430009	2.17217e-07	6.66311	MES_0
klf12a	ccn1	0.0429992	0.0429992	6.00336e-11	10.2216	MES_0
mitfb	fibinb	0.0429983	0.0429983	2.94213e-14	13.5313	MES_0
nfic	rbp4	0.042984	0.042984	8.3802e-10	9.07675	MES_0
egr1	lum	0.0429832	0.0429832	1.90686e-14	13.7197	MES_0
foxo1a	lmo7a	0.0429821	0.0429821	1.84905e-09	8.73305	MES_0
foxo1a	b2ml	0.042956	0.042956	9.19642e-13	12.0364	MES_0
thrab	pawr	0.042884	0.042884	1.08731e-13	12.9636	MES_0
elf3	cd74a	0.0428808	0.0428808	2.19985e-10	9.65761	MES_0
runx1	prickle2b	0.042851	0.042851	3.81062e-14	13.419	MES_0
atf3	cldna	-0.0428127	0.0428127	8.54187e-16	15.0684	MES_0
mafk	cast	0.0427464	0.0427464	3.2828e-14	13.4838	MES_0
ches1	krt97	-0.0427369	0.0427369	8.45416e-07	6.07293	MES_0
elf3	spns2	0.0427353	0.0427353	1.06218e-11	10.9738	MES_0
klf8	degs2	0.0427327	0.0427327	1.42076e-19	18.8475	MES_0
mafk	serpinh1b	-0.0426474	0.0426474	6.08129e-12	11.216	MES_0
nr4a1	jdp2b	0.0426171	0.0426171	5.53119e-11	10.2572	MES_0
klf12b	ccn1	0.0426159	0.0426159	7.12804e-09	8.14703	MES_0
tfeb	fosl1a	0.0426021	0.0426021	1.34083e-06	5.87263	MES_0
lmx1ba	col11a1b	-0.0425977	0.0425977	7.2463e-08	7.13988	MES_0
osr1	kremen1	0.0425907	0.0425907	5.68766e-11	10.2451	MES_0
nr3c2	lnx1	-0.0425865	0.0425865	1.43711e-07	6.84251	MES_0
twist1a	has1	0.042556	0.042556	7.28872e-10	9.13735	MES_0
sox6	apoeb	0.0425453	0.0425453	7.91837e-12	11.1014	MES_0
klf8	ptgis	0.042452	0.042452	3.58861e-10	9.44507	MES_0
cux1a	slc38a3a	0.0424305	0.0424305	1.89383e-12	11.7227	MES_0
rfx2	tenm3	-0.0424024	0.0424024	4.58062e-09	8.33908	MES_0
sox9a	pcolce2b	0.0423786	0.0423786	4.01892e-09	8.39589	MES_0
raraa	ptgdsb.1	0.0423387	0.0423387	9.32768e-08	7.03023	MES_0
sox6	tfpia	0.0423075	0.0423075	5.6506e-10	9.24791	MES_0
foxo1a	furina	0.0422984	0.0422984	6.29739e-14	13.2008	MES_0
egr1	npr1a	0.0422978	0.0422978	1.16569e-12	11.9334	MES_0
gli2b	cxcl12a	-0.0422054	0.0422054	1.28455e-10	9.89125	MES_0
klf8	sik1	0.0422002	0.0422002	4.27317e-15	14.3692	MES_0
tp63	itgb4	0.0421797	0.0421797	4.51794e-06	5.34506	MES_0
rarab	smap2	0.0421576	0.0421576	6.70467e-15	14.1736	MES_0
foxp1b	f5	0.0421568	0.0421568	4.27694e-12	11.3689	MES_0
arid3a	c1qtnf5	0.0421536	0.0421536	4.29245e-11	10.3673	MES_0
sp7	krt94	0.0421472	0.0421472	4.7618e-08	7.32223	MES_0
nkx3-1	cd74a	0.0421366	0.0421366	2.31041e-08	7.63631	MES_0
fosb	tnika	-0.0420955	0.0420955	4.37083e-12	11.3594	MES_0
fosb	slit3	0.0420675	0.0420675	3.79273e-08	7.42105	MES_0
ches1	loxl2a	0.042048	0.042048	1.83178e-13	12.7371	MES_0
hlfa	entpd1	-0.0420341	0.0420341	1.89243e-09	8.72298	MES_0
sox6	mmp9	0.042003	0.042003	7.43768e-11	10.1286	MES_0
rfx2	ntn1a	-0.0419981	0.0419981	6.41942e-10	9.1925	MES_0
thrab	si:dkey-221j11.3	0.0419432	0.0419432	9.0188e-11	10.0449	MES_0
nfixb	anxa11a	0.0419049	0.0419049	8.58351e-17	16.0663	MES_0
foxo1b	tnks1bp1	0.0418995	0.0418995	5.19741e-12	11.2842	MES_0
lmx1ba	adam8a	-0.041889	0.041889	2.9644e-11	10.5281	MES_0
grhl2a	il1b	0.041849	0.041849	9.54212e-17	16.0204	MES_0
fosb	tmem176l.4	-0.0418457	0.0418457	6.4548e-08	7.19012	MES_0
sox6	paqr5b	0.0418023	0.0418023	2.16971e-08	7.6636	MES_0
dlx6a	f3b	-0.0417949	0.0417949	5.50971e-10	9.25887	MES_0
mafk	eppk1	-0.0417224	0.0417224	1.45721e-10	9.83648	MES_0
bhlhe40	macc1	0.0416481	0.0416481	2.29224e-14	13.6397	MES_0
tp63	pfn1	0.0415669	0.0415669	4.93701e-10	9.30654	MES_0
jun	zfp36l1b	-0.0415463	0.0415463	3.04131e-15	14.5169	MES_0
meox2a	sparc	0.0415462	0.0415462	2.08572e-11	10.6807	MES_0
twist1a	lum	-0.0415399	0.0415399	3.95393e-09	8.40297	MES_0
jun	fstl1b	-0.0415363	0.0415363	7.91438e-14	13.1016	MES_0
foxo1a	klhl4	-0.0415147	0.0415147	1.2781e-11	10.8934	MES_0
runx1	pfn1	0.0415089	0.0415089	8.98325e-14	13.0466	MES_0
atf3	slit3	-0.0414941	0.0414941	2.52982e-09	8.59691	MES_0
jdp2b	zgc:153665	-0.0414621	0.0414621	2.02014e-10	9.69462	MES_0
nfic	rbms3	0.041433	0.041433	3.20473e-12	11.4942	MES_0
pknox2	krt94	-0.0413826	0.0413826	9.04959e-08	7.04337	MES_0
jun	pmp22b	0.0413685	0.0413685	7.38312e-07	6.13176	MES_0
tbx2a	scel	0.0413469	0.0413469	1.69328e-10	9.77127	MES_0
bhlhe40	asap3	0.0413338	0.0413338	1.56813e-12	11.8046	MES_0
elf3	cldn7b	0.0413211	0.0413211	1.05834e-15	14.9754	MES_0
nfatc1	npr1a	0.0413205	0.0413205	4.02991e-10	9.3947	MES_0
dlx4a	elovl1a	0.0412954	0.0412954	1.5063e-11	10.8221	MES_0
pknox2	kremen1	0.0412812	0.0412812	3.42006e-07	6.46597	MES_0
rarab	col18a1a	-0.0412682	0.0412682	2.82769e-07	6.54857	MES_0
klf12b	ccn2a	0.0412661	0.0412661	1.30096e-08	7.88574	MES_0
runx1	bnc2	0.0412561	0.0412561	8.2858e-16	15.0817	MES_0
lmx1ba	myh9a	-0.0412417	0.0412417	1.29639e-11	10.8873	MES_0
mafk	bmpr1ba	-0.0412165	0.0412165	3.63053e-13	12.44	MES_0
fosl1a	pawr	0.0412091	0.0412091	6.57983e-12	11.1818	MES_0
ar	sparc	-0.0411902	0.0411902	9.65607e-09	8.0152	MES_0
meox2a	robo1	-0.0411853	0.0411853	2.877e-10	9.54106	MES_0
fosl1a	zbtb16a	0.0411829	0.0411829	4.48946e-09	8.34781	MES_0
foxo1a	rbp4	0.0411754	0.0411754	2.63539e-08	7.57916	MES_0
nfixb	rgs5a	-0.0411498	0.0411498	3.37671e-07	6.47151	MES_0
dlx4a	myo5b	0.0411353	0.0411353	2.50618e-08	7.60099	MES_0
trps1	foxp4	0.0410001	0.0410001	2.12325e-09	8.673	MES_0
creb5b	nedd9	0.0409925	0.0409925	6.58289e-09	8.18158	MES_0
bhlhe40	itga5	-0.040961	0.040961	8.50808e-07	6.07017	MES_0
klf2a	ccn2a	-0.0409438	0.0409438	9.63929e-10	9.01596	MES_0
fosl1a	stat3	0.0409202	0.0409202	4.58486e-11	10.3387	MES_0
cux1a	prss35	0.0409169	0.0409169	3.5331e-08	7.45184	MES_0
pbx1a	slit3	0.040861	0.040861	3.69724e-09	8.43212	MES_0
cux1a	frem2b	0.0408556	0.0408556	2.80314e-11	10.5524	MES_0
tbx2a	eppk1	0.0408551	0.0408551	4.71367e-08	7.32664	MES_0
jdp2b	btg2	0.0408349	0.0408349	2.84103e-14	13.5465	MES_0
mafk	ptgdsb.1	0.0408047	0.0408047	4.7464e-13	12.3236	MES_0
im:7142702	lnx1	0.0407788	0.0407788	3.28227e-08	7.48383	MES_0
im:7142702	plch2a	0.040775	0.040775	2.21762e-07	6.65411	MES_0
ebf3a	nedd9	-0.040761	0.040761	1.59581e-11	10.797	MES_0
foxo1b	pfn1	0.0406618	0.0406618	6.19604e-12	11.2079	MES_0
gli2b	daam1b	0.0406383	0.0406383	3.21649e-07	6.49262	MES_0
nr4a3	enpp1	-0.0406318	0.0406318	5.41233e-13	12.2666	MES_0
twist2	slc38a3a	-0.0406301	0.0406301	8.43305e-13	12.074	MES_0
foxp4	actn4	0.0406239	0.0406239	1.00569e-14	13.9975	MES_0
rorc	ecrg4a	0.0406124	0.0406124	6.65663e-11	10.1767	MES_0
dlx4a	itga6b	-0.0406031	0.0406031	2.22667e-05	4.65234	MES_0
pknox2	ptgdsb.1	-0.0405642	0.0405642	2.62832e-11	10.5803	MES_0
pknox2	fstl3	0.0405297	0.0405297	9.31137e-16	15.031	MES_0
klf12a	sfrp2	0.0405016	0.0405016	2.61276e-10	9.5829	MES_0
jun	fosab	0.0404714	0.0404714	2.74176e-10	9.56197	MES_0
atf3	cygb1	-0.0404635	0.0404635	0.000106203	3.97386	MES_0
raraa	perp	-0.0404587	0.0404587	5.1296e-06	5.28992	MES_0
foxp4	cast	0.0404532	0.0404532	7.43716e-09	8.12859	MES_0
runx1	c1qtnf5	-0.0404142	0.0404142	4.50146e-14	13.3466	MES_0
foxp4	ptprfa	0.0404138	0.0404138	7.57283e-11	10.1207	MES_0
klf8	sfrp2	-0.0404086	0.0404086	3.16748e-13	12.4993	MES_0
sox6	thy1	0.040398	0.040398	1.64843e-05	4.78293	MES_0
tp63	rcn3	-0.0403966	0.0403966	1.89544e-12	11.7223	MES_0
zeb1b	fn1b	0.0403889	0.0403889	1.94469e-07	6.71115	MES_0
jdp2b	rbms3	-0.0403845	0.0403845	1.94208e-10	9.71173	MES_0
junba	mdka	-0.0403442	0.0403442	2.44531e-05	4.61167	MES_0
rfx2	bcam	0.0402666	0.0402666	1.82016e-12	11.7399	MES_0
pknox2	adam8a	-0.0402634	0.0402634	1.9572e-08	7.70837	MES_0
hnf4g	timp2b	0.0402515	0.0402515	8.77537e-09	8.05673	MES_0
jdp2b	phlda2	-0.0402083	0.0402083	1.18982e-06	5.92452	MES_0
nfic	angptl1a	0.0402023	0.0402023	1.15206e-15	14.9385	MES_0
hmga2	ccl25b	0.0401823	0.0401823	1.38697e-12	11.8579	MES_0
jdp2b	slit3	-0.0401723	0.0401723	9.01297e-11	10.0451	MES_0
meox2a	raly	0.0401659	0.0401659	4.86298e-12	11.3131	MES_0
nr4a1	cdh1	0.0401363	0.0401363	1.55187e-08	7.80914	MES_0
ches1	phlda2	-0.0401353	0.0401353	4.81725e-09	8.3172	MES_0
gfi1b	nrg1	0.040135	0.040135	5.05465e-15	14.2963	MES_0
zeb1b	itga11a	0.0400847	0.0400847	1.36167e-10	9.86593	MES_0
hmga2	col10a1a	0.0400831	0.0400831	0.000214232	3.66912	MES_0
rorc	mdka	0.0400775	0.0400775	3.62471e-06	5.44073	MES_0
jdp2b	fosab	0.0400684	0.0400684	5.65096e-14	13.2479	MES_0
pknox2	bmpr1ba	-0.0400591	0.0400591	3.22638e-15	14.4913	MES_0
foxo1a	asap3	0.040045	0.040045	1.96642e-14	13.7063	MES_0
hnf4g	abi3bpb	-0.0400264	0.0400264	1.97009e-07	6.70551	MES_0
atf3	dkk3b	-0.0400232	0.0400232	0.000804146	3.09466	MES_0
klf2a	thbs4b	-0.0400071	0.0400071	1.55806e-10	9.80742	MES_0
thrab	bmpr1ba	-0.0399944	0.0399944	4.8628e-14	13.3131	MES_0
jdp2b	baiap2a	-0.0399885	0.0399885	5.34621e-06	5.27195	MES_0
rarab	ephb2b	0.0399416	0.0399416	3.21456e-10	9.49288	MES_0
ebf3a	krt94	-0.0398643	0.0398643	3.99774e-11	10.3982	MES_0
klf12a	f3b	0.0398579	0.0398579	5.33272e-13	12.2731	MES_0
dlx4a	vcana	0.0398572	0.0398572	2.56606e-09	8.59073	MES_0
jun	stat3	-0.0398521	0.0398521	2.28947e-13	12.6403	MES_0
pknox2	nectin1b	-0.0398333	0.0398333	4.75009e-09	8.3233	MES_0
ches1	kazald3	0.0398157	0.0398157	7.17384e-14	13.1442	MES_0
sox9a	zgc:153665	-0.039814	0.039814	1.46041e-13	12.8355	MES_0
foxp4	macc1	0.0398083	0.0398083	3.31173e-07	6.47995	MES_0
thrab	scel	0.0397907	0.0397907	0.000816364	3.08812	MES_0
foxo1a	pkp3a	0.0397573	0.0397573	1.00523e-10	9.99774	MES_0
elf3	tmem176l.4	0.0397436	0.0397436	1.33387e-11	10.8749	MES_0
foxp4	loxl2a	-0.0397122	0.0397122	2.67619e-13	12.5725	MES_0
barhl1a	socs3a	-0.0397112	0.0397112	7.92072e-09	8.10124	MES_0
im:7142702	pawr	0.0396773	0.0396773	3.30036e-10	9.48144	MES_0
lhx9	slc51a	0.0396773	0.0396773	5.17474e-15	14.2861	MES_0
ches1	elovl1a	-0.0396652	0.0396652	4.74358e-14	13.3239	MES_0
dlx6a	entpd1	-0.0396514	0.0396514	7.39985e-09	8.13078	MES_0
jun	ephb2b	-0.03965	0.03965	3.36239e-09	8.47335	MES_0
klf8	grhl2a	0.0396184	0.0396184	2.14812e-14	13.6679	MES_0
heyl	apoeb	-0.0395761	0.0395761	3.10361e-08	7.50813	MES_0
stat3	ccl25b	0.0395602	0.0395602	1.09266e-07	6.96151	MES_0
nfixb	cobll1b	0.0395556	0.0395556	3.37594e-13	12.4716	MES_0
grhl2a	gmds	0.0395473	0.0395473	3.57123e-12	11.4472	MES_0
runx2b	daam1b	0.0395471	0.0395471	1.9164e-09	8.71751	MES_0
klf12a	baiap2a	-0.0395469	0.0395469	1.02368e-06	5.98984	MES_0
runx3	fibinb	-0.0395204	0.0395204	1.35602e-10	9.86773	MES_0
dlx6a	mmp2	-0.0394762	0.0394762	2.05771e-09	8.68662	MES_0
atf3	ecrg4a	-0.0394717	0.0394717	3.75135e-07	6.42581	MES_0
creb3l3b	rcn3	-0.039461	0.039461	1.64116e-13	12.7848	MES_0
junba	sparc	-0.0394487	0.0394487	1.34807e-11	10.8703	MES_0
gli2a	pleca	-0.0394409	0.0394409	1.72642e-13	12.7629	MES_0
klf7a	baiap2a	-0.0394133	0.0394133	5.29082e-07	6.27648	MES_0
foxp1b	asap3	0.0393693	0.0393693	2.01038e-11	10.6967	MES_0
lmx1ba	elovl1a	0.0393585	0.0393585	6.10313e-15	14.2144	MES_0
klf12a	notum1b	0.0393428	0.0393428	1.5164e-13	12.8192	MES_0
rfx2	f3b	-0.0393343	0.0393343	7.78092e-07	6.10897	MES_0
cebpd	fstb	0.0393001	0.0393001	1.42022e-13	12.8476	MES_0
elf3	ugt5f1	0.0392905	0.0392905	1.22387e-12	11.9123	MES_0
dlx4a	baiap2a	0.0392402	0.0392402	2.28596e-06	5.64093	MES_0
nr4a3	lima1a	0.0391912	0.0391912	1.26667e-10	9.89734	MES_0
tp63	col11a1a	-0.0391836	0.0391836	1.79655e-08	7.74556	MES_0
fosab	crip1	0.0391778	0.0391778	4.94663e-13	12.3057	MES_0
alx4a	f3a	0.0391541	0.0391541	8.78453e-14	13.0563	MES_0
nr4a3	ccl25b	-0.0391539	0.0391539	5.64524e-08	7.24832	MES_0
runx3	serpine1	-0.0391453	0.0391453	5.63692e-11	10.249	MES_0
bach2b	si:busm1-57f23.1	0.0391401	0.0391401	5.33891e-09	8.27255	MES_0
runx1	angptl2b	0.0391381	0.0391381	3.27314e-11	10.485	MES_0
foxp1b	pkp3a	0.0390876	0.0390876	1.16474e-10	9.93377	MES_0
lmx1ba	npr1a	0.0390734	0.0390734	6.66561e-11	10.1762	MES_0
stat3	emilin1b	0.0390723	0.0390723	2.09035e-15	14.6798	MES_0
foxo1b	dkk3b	-0.0390698	0.0390698	2.01625e-08	7.69546	MES_0
dlx4a	znf185	0.0390693	0.0390693	5.58712e-05	4.25281	MES_0
hmga2	frem2b	0.0390491	0.0390491	5.03003e-12	11.2984	MES_0
hey2	fa2h	0.0390169	0.0390169	5.63327e-07	6.24924	MES_0
tp63	serpine1	-0.0389835	0.0389835	6.84797e-11	10.1644	MES_0
nfia	rgs5a	0.0389826	0.0389826	3.20036e-08	7.4948	MES_0
sox6	ogfrl2	0.0389597	0.0389597	2.05424e-08	7.68735	MES_0
foxo1b	postnb	-0.0389534	0.0389534	1.27031e-10	9.89609	MES_0
elf3	rnf213a	0.0389488	0.0389488	2.55216e-13	12.5931	MES_0
mef2cb	fn1a	0.0388636	0.0388636	1.73367e-07	6.76103	MES_0
jdp2b	ccn1	0.0388379	0.0388379	8.5861e-10	9.0662	MES_0
lhx9	c4b	0.0388291	0.0388291	1.12969e-10	9.94704	MES_0
nr3c2	rfx2	0.0388247	0.0388247	3.4755e-11	10.459	MES_0
tp63	krt5	0.0388107	0.0388107	4.93943e-16	15.3063	MES_0
cebpd	zfp36l1b	0.0387993	0.0387993	5.97742e-13	12.2235	MES_0
pknox2	sema6e	-0.038783	0.038783	2.41089e-08	7.61782	MES_0
jdp2b	macrod2	-0.0387255	0.0387255	1.06137e-11	10.9741	MES_0
dlx6a	igf2b	0.0387128	0.0387128	4.89495e-07	6.31025	MES_0
foxp4	unc5b	0.0386934	0.0386934	5.85768e-13	12.2323	MES_0
mafk	lamb1a	-0.0386907	0.0386907	1.68078e-10	9.77449	MES_0
nkx3-1	tmprss13b	0.0386812	0.0386812	1.55923e-17	16.8071	MES_0
raraa	aste1a	0.0386718	0.0386718	1.70845e-09	8.7674	MES_0
nr1d4b	fn1a	0.0386695	0.0386695	8.73965e-09	8.05851	MES_0
ches1	macc1	-0.0386298	0.0386298	8.72787e-11	10.0591	MES_0
bach2b	itgb4	0.0386036	0.0386036	9.65429e-08	7.01528	MES_0
mafk	ogna	-0.0385985	0.0385985	1.13678e-08	7.94432	MES_0
fosab	btg2	0.0385889	0.0385889	1.14444e-10	9.94141	MES_0
runx2b	cldni	-0.0385856	0.0385856	1.19639e-09	8.92213	MES_0
tcf7l2	socs3a	0.0385796	0.0385796	2.64938e-08	7.57686	MES_0
foxo1a	c1qtnf5	-0.0385772	0.0385772	1.08999e-05	4.96258	MES_0
nr4a1	dhrs13a.2	-0.0385464	0.0385464	8.8008e-14	13.0555	MES_0
foxo1b	baiap2l1a	0.0385456	0.0385456	2.6356e-09	8.57912	MES_0
nr1d2a	zgc:153665	-0.038536	0.038536	2.24697e-10	9.6484	MES_0
rarab	rnf213a	0.0385224	0.0385224	2.60535e-12	11.5841	MES_0
nr4a3	cxadr	0.0385094	0.0385094	8.87869e-13	12.0517	MES_0
rarab	ccn1	-0.038504	0.038504	3.22293e-14	13.4917	MES_0
lef1	enpp1	0.0384727	0.0384727	2.46221e-13	12.6087	MES_0
mitfa	itgb4	0.0384184	0.0384184	2.62572e-09	8.58075	MES_0
nfatc1	col11a1a	0.0384143	0.0384143	2.1939e-08	7.65878	MES_0
rarab	cxcl12a	-0.0384004	0.0384004	1.4702e-09	8.83262	MES_0
dmrt1	itga5	-0.0383769	0.0383769	2.00119e-08	7.69871	MES_0
cux1a	sfrp2	-0.0383721	0.0383721	2.20382e-09	8.65682	MES_0
nfatc1	paqr5b	-0.0383487	0.0383487	4.01365e-10	9.39646	MES_0
cebpd	rcn3	-0.0383447	0.0383447	1.73748e-11	10.7601	MES_0
foxo1b	klf4	0.0383262	0.0383262	4.21876e-14	13.3748	MES_0
raraa	si:ch211-156j16.1	-0.0383131	0.0383131	8.32262e-11	10.0797	MES_0
egr1	dkk2	0.0382937	0.0382937	1.67244e-11	10.7767	MES_0
meis3	thy1	0.0382798	0.0382798	7.03976e-08	7.15244	MES_0
foxp1b	ezrb	0.0382791	0.0382791	1.10084e-14	13.9583	MES_0
meis3	myh9a	0.0382769	0.0382769	1.05499e-11	10.9768	MES_0
nfia	fgfr1b	0.0382338	0.0382338	8.18211e-07	6.08713	MES_0
hmga2	smoc1	0.0382053	0.0382053	4.10267e-07	6.38693	MES_0
mafk	klf6a	-0.0381985	0.0381985	2.17323e-09	8.66289	MES_0
foxp4	pnp5a	0.0381846	0.0381846	1.17834e-16	15.9287	MES_0
gfi1b	lama5	0.0381688	0.0381688	2.35744e-12	11.6276	MES_0
foxp4	igfbp5b	0.0381633	0.0381633	4.62377e-10	9.335	MES_0
tp63	ppap2d	0.0381525	0.0381525	1.6894e-11	10.7723	MES_0
hmga2	cldna	-0.038066	0.038066	5.93101e-13	12.2269	MES_0
sox6	mmp2	-0.0379949	0.0379949	1.99464e-07	6.70014	MES_0
foxo1b	ier2b	0.0379861	0.0379861	2.03777e-11	10.6908	MES_0
jun	bmpr1ba	0.0379837	0.0379837	3.38542e-16	15.4704	MES_0
lmx1ba	apoeb	-0.0379801	0.0379801	1.5681e-10	9.80463	MES_0
tp63	cldn7b	0.0379694	0.0379694	2.1898e-09	8.6596	MES_0
klf6a	rcn3	0.0379679	0.0379679	2.26561e-10	9.64482	MES_0
fosab	zgc:153665	0.0379621	0.0379621	2.19203e-07	6.65915	MES_0
raraa	tmem176l.4	-0.0379614	0.0379614	2.5618e-11	10.5915	MES_0
junba	ccn1	0.0379527	0.0379527	5.20093e-08	7.28392	MES_0
klf6a	aqp3a	-0.0379483	0.0379483	9.48942e-08	7.02276	MES_0
ar	lmo7a	0.0379466	0.0379466	2.75447e-06	5.55996	MES_0
nr4a3	fstl3	-0.0379418	0.0379418	7.87744e-11	10.1036	MES_0
nfatc1	cxcl12a	0.0378132	0.0378132	4.08076e-12	11.3893	MES_0
nfatc1	furina	0.0378025	0.0378025	8.73238e-11	10.0589	MES_0
nr4a3	aspn	0.0377932	0.0377932	1.13447e-07	6.94521	MES_0
foxp4	jdp2b	-0.0377741	0.0377741	1.70164e-10	9.76913	MES_0
nr4a1	krt94	-0.037773	0.037773	3.12158e-09	8.50563	MES_0
grhl2a	fgfr1b	-0.0377651	0.0377651	4.18012e-11	10.3788	MES_0
rfx2	si:ch211-156j16.1	-0.037758	0.037758	7.79819e-14	13.108	MES_0
nr3c2	cygb1	0.0377288	0.0377288	1.81161e-06	5.74194	MES_0
lef1	col4a5	0.0377142	0.0377142	6.30376e-13	12.2004	MES_0
foxo1a	dennd4a	0.0376874	0.0376874	2.24892e-12	11.648	MES_0
ches1	add3a	0.0376772	0.0376772	2.85892e-13	12.5438	MES_0
tp63	lama5	0.0376585	0.0376585	3.20595e-09	8.49404	MES_0
raraa	mdka	-0.0376533	0.0376533	7.28174e-07	6.13776	MES_0
elf3	ftr83	0.0376499	0.0376499	1.46223e-15	14.835	MES_0
foxp1b	krt93	0.0376118	0.0376118	1.15833e-13	12.9362	MES_0
elf3	f3a	-0.0376053	0.0376053	6.9562e-12	11.1576	MES_0
mitfb	ccdc80	0.0375996	0.0375996	1.30289e-11	10.8851	MES_0
dlx6a	thy1	-0.0375798	0.0375798	7.1339e-09	8.14667	MES_0
foxp4	nbn	0.0375775	0.0375775	9.79048e-13	12.0092	MES_0
trps1	selenop	-0.0375709	0.0375709	1.17464e-13	12.9301	MES_0
nfixb	plce1	0.0375661	0.0375661	1.34661e-11	10.8708	MES_0
sox6	nrxn2a	0.0375352	0.0375352	7.35647e-10	9.13333	MES_0
dmrt1	spns2	0.0375338	0.0375338	1.0819e-11	10.9658	MES_0
dlx4a	plch2a	0.0375041	0.0375041	1.00416e-08	7.9982	MES_0
jdp2b	fosb	0.0374937	0.0374937	3.30555e-13	12.4808	MES_0
mafk	numbl	-0.0374854	0.0374854	1.91093e-11	10.7188	MES_0
foxp4	add3a	-0.0374774	0.0374774	2.00905e-09	8.69701	MES_0
zeb1b	zcchc24	0.0374544	0.0374544	4.52599e-16	15.3443	MES_0
egr1	fstl3	0.0374522	0.0374522	1.60821e-08	7.79366	MES_0
rorc	lnx1	0.0374511	0.0374511	1.75724e-06	5.75517	MES_0
nr4a3	igf2b	0.037428	0.037428	3.06731e-07	6.51324	MES_0
pknox2	postnb	0.0374173	0.0374173	1.66653e-11	10.7782	MES_0
alx4a	krt97	-0.0373981	0.0373981	6.3246e-09	8.19897	MES_0
rxraa	eppk1	0.0373891	0.0373891	6.75476e-09	8.17039	MES_0
sox6	aspn	0.037366	0.037366	5.36306e-12	11.2706	MES_0
hmga2	scube3	0.0373228	0.0373228	3.52024e-17	16.4534	MES_0
lmx1ba	ccn1	-0.0372702	0.0372702	8.7218e-10	9.05939	MES_0
jun	ier2b	0.0372633	0.0372633	1.39341e-14	13.8559	MES_0
creb5b	bcar1	0.0372507	0.0372507	4.42282e-11	10.3543	MES_0
sox6	notch1a	0.0372346	0.0372346	5.09425e-07	6.29292	MES_0
foxp1b	lima1a	0.0372159	0.0372159	3.56576e-09	8.44785	MES_0
pknox2	tmem176l.4	-0.037201	0.037201	1.1355e-07	6.94481	MES_0
grhl2a	hsd17b12a	0.0371749	0.0371749	6.38811e-10	9.19463	MES_0
lmx1ba	cldni	-0.0371742	0.0371742	1.0733e-10	9.96928	MES_0
runx2b	angptl1a	-0.0371525	0.0371525	2.1362e-11	10.6704	MES_0
runx2a	kazald3	-0.037137	0.037137	7.07087e-10	9.15053	MES_0
alx4a	sparc	0.0371157	0.0371157	7.90207e-13	12.1023	MES_0
nr4a3	fn1b	0.0371035	0.0371035	6.78475e-06	5.16847	MES_0
tcf7l1b	bcam	0.0370883	0.0370883	1.21052e-08	7.91703	MES_0
pknox2	nrg1	-0.0370429	0.0370429	3.68372e-12	11.4337	MES_0
elf3	rhcgl1	0.0370414	0.0370414	1.36239e-14	13.8657	MES_0
sox9a	scel	-0.0370405	0.0370405	8.40004e-09	8.07572	MES_0
foxo3b	krt97	0.0370332	0.0370332	1.69025e-06	5.77205	MES_0
elf3	dmrt1	0.0370323	0.0370323	4.26297e-17	16.3703	MES_0
runx3	klf8	0.0369812	0.0369812	7.72574e-11	10.1121	MES_0
ches1	lhfpl6	0.0369686	0.0369686	6.72495e-14	13.1723	MES_0
meox2a	socs3a	-0.0369563	0.0369563	5.03174e-06	5.29828	MES_0
fosl1a	and1	0.0369508	0.0369508	0.000686677	3.16325	MES_0
foxo1b	furina	0.0369378	0.0369378	1.07948e-11	10.9668	MES_0
jun	dennd4a	-0.0369203	0.0369203	8.05224e-12	11.0941	MES_0
tfeb	cldna	0.036916	0.036916	4.41263e-07	6.3553	MES_0
dlx6a	itgb4	-0.0368873	0.0368873	8.85718e-06	5.0527	MES_0
pknox2	dennd4a	0.0368846	0.0368846	3.26255e-13	12.4864	MES_0
hmga2	lum	0.0368805	0.0368805	9.41584e-12	11.0261	MES_0
tbx2a	slc51a	-0.0368718	0.0368718	1.00826e-08	7.99643	MES_0
stat5a	lima1a	0.0368523	0.0368523	2.29657e-13	12.6389	MES_0
runx3	krt91	0.0368473	0.0368473	7.89373e-08	7.10272	MES_0
rfx3	phlda2	0.0367658	0.0367658	4.17175e-09	8.37968	MES_0
heyl	sfrp1b	-0.0367466	0.0367466	8.14701e-05	4.089	MES_0
sox9a	abi3bpb	-0.0367427	0.0367427	6.69696e-08	7.17412	MES_0
pknox2	chmp6b	0.0367323	0.0367323	7.86596e-10	9.10425	MES_0
meox2a	si:busm1-57f23.1	-0.0367057	0.0367057	6.97807e-11	10.1563	MES_0
runx3	myh9a	-0.0367051	0.0367051	1.09827e-08	7.95929	MES_0
elf3	elovl6l	0.0366929	0.0366929	2.69102e-14	13.5701	MES_0
jun	thbs3a	0.0366573	0.0366573	8.7792e-12	11.0565	MES_0
cux1a	gli2a	0.0366274	0.0366274	3.81405e-12	11.4186	MES_0
rfx2	ptprub	0.0366272	0.0366272	4.23705e-10	9.37294	MES_0
fosl1a	epcam	0.0365765	0.0365765	7.21253e-11	10.1419	MES_0
runx3	angptl2b	-0.036576	0.036576	4.29265e-09	8.36727	MES_0
hmga2	hbegfa	0.0365589	0.0365589	1.64086e-08	7.78493	MES_0
raraa	csf1ra	-0.0365123	0.0365123	5.62528e-13	12.2499	MES_0
fosl1a	fosab	0.0365099	0.0365099	7.92273e-16	15.1011	MES_0
klf15	baiap2a	-0.0364977	0.0364977	1.80545e-09	8.74341	MES_0
nr4a1	gli2a	-0.0364814	0.0364814	1.5787e-11	10.8017	MES_0
rorc	fn1b	0.0364795	0.0364795	1.58724e-09	8.79936	MES_0
jdp2b	dkk3b	0.0364645	0.0364645	2.77945e-05	4.55604	MES_0
barhl1a	rgs5a	-0.036456	0.036456	5.03494e-13	12.298	MES_0
mitfb	and1	-0.0364332	0.0364332	4.79659e-08	7.31907	MES_0
klf6a	sfrp2	-0.0364186	0.0364186	2.05615e-10	9.68695	MES_0
fosl1a	pnp5a	0.0363898	0.0363898	6.40407e-17	16.1935	MES_0
klf8	ezrb	0.0363854	0.0363854	4.8297e-13	12.3161	MES_0
nr4a3	tenm3	-0.0363821	0.0363821	1.00156e-08	7.99932	MES_0
pknox2	myh9a	-0.0363797	0.0363797	4.75982e-10	9.32241	MES_0
klf7a	cast	-0.0363674	0.0363674	9.21591e-13	12.0355	MES_0
twist1a	zbtb16a	-0.0363666	0.0363666	5.01576e-10	9.29966	MES_0
nr4a3	lum	-0.0363552	0.0363552	7.61636e-12	11.1183	MES_0
zeb1b	nupr1b	0.0363496	0.0363496	3.37446e-15	14.4718	MES_0
jun	f3b	-0.0363394	0.0363394	3.38927e-07	6.46989	MES_0
nr3c2	jdp2b	0.0363384	0.0363384	8.38717e-12	11.0764	MES_0
foxp4	nid1b	-0.0363099	0.0363099	7.917e-12	11.1014	MES_0
hmga2	fstl1b	0.0363065	0.0363065	2.44531e-08	7.61167	MES_0
foxp4	myo5b	0.0363037	0.0363037	5.10193e-06	5.29227	MES_0
dlx4a	ppl	0.0362956	0.0362956	7.88826e-05	4.10302	MES_0
foxo1a	vcana	-0.0362951	0.0362951	3.7348e-10	9.42773	MES_0
sox6	si:busm1-57f23.1	0.0362785	0.0362785	1.19635e-12	11.9221	MES_0
fosab	loxl2a	-0.0362708	0.0362708	1.71585e-14	13.7655	MES_0
fosb	tfpia	-0.0362643	0.0362643	1.91526e-07	6.71777	MES_0
fosab	sema4ba	0.0362581	0.0362581	2.90307e-11	10.5371	MES_0
jdp2b	evpla	-0.036257	0.036257	1.12258e-12	11.9498	MES_0
meis3	frem2b	0.0362515	0.0362515	5.53506e-10	9.25688	MES_0
creb5b	srgn	-0.0362455	0.0362455	2.30275e-16	15.6378	MES_0
tp63	tmprss4a	0.0362097	0.0362097	5.4734e-08	7.26174	MES_0
jun	clic2	0.0361795	0.0361795	8.1506e-11	10.0888	MES_0
dlx6a	si:busm1-57f23.1	0.0361768	0.0361768	2.3647e-05	4.62622	MES_0
nfic	postnb	0.0361585	0.0361585	9.67348e-11	10.0144	MES_0
dlx6a	abi3bpb	-0.0361291	0.0361291	5.58768e-09	8.25277	MES_0
nr1d2a	gadd45ba	0.0361049	0.0361049	8.14685e-10	9.08901	MES_0
mafk	zbtb16a	0.0360877	0.0360877	1.61591e-09	8.79158	MES_0
sox9a	col11a1a	-0.036083	0.036083	6.60173e-08	7.18034	MES_0
sox6	eppk1	0.0360613	0.0360613	1.39523e-09	8.85535	MES_0
gfi1b	krt15	0.0360591	0.0360591	1.52239e-09	8.81747	MES_0
nr1d2a	actn4	-0.0360476	0.0360476	1.4168e-14	13.8487	MES_0
foxp4	tnfrsf9a	0.0360344	0.0360344	1.20721e-15	14.9182	MES_0
dlx6a	aspn	0.0360335	0.0360335	3.58381e-08	7.44565	MES_0
elf3	mid1ip1a	0.036016	0.036016	1.15311e-12	11.9381	MES_0
fosb	serpinb1l4	-0.0360025	0.0360025	8.02151e-13	12.0957	MES_0
rfx2	nt5e	-0.0359821	0.0359821	3.54626e-11	10.4502	MES_0
dlx4a	slit3	-0.0359672	0.0359672	1.08977e-08	7.96266	MES_0
ches1	tnfaip6	-0.0359614	0.0359614	6.85573e-08	7.16395	MES_0
nr1d2a	angptl2b	0.0359553	0.0359553	3.46482e-08	7.46032	MES_0
rfx2	cldna	0.0359432	0.0359432	1.00709e-07	6.99693	MES_0
nfat5b	and1	-0.035919	0.035919	4.46103e-07	6.35056	MES_0
nkx3-1	epha7	-0.0359123	0.0359123	4.90108e-15	14.3097	MES_0
thrab	mdka	-0.0359058	0.0359058	3.9195e-09	8.40677	MES_0
spi1b	itga5	0.0359	0.0359	1.71144e-11	10.7666	MES_0
dlx4a	eppk1	0.0358924	0.0358924	4.96914e-07	6.30372	MES_0
foxo1a	rpl28	-0.035884	0.035884	2.21638e-13	12.6544	MES_0
foxo1a	add3a	0.0358751	0.0358751	2.5639e-12	11.5911	MES_0
foxo1a	rps27l	-0.0358666	0.0358666	9.3092e-16	15.0311	MES_0
klf15	jdp2b	0.0358544	0.0358544	1.67593e-09	8.77574	MES_0
tbx2a	serpinb1l4	0.0358505	0.0358505	1.5203e-11	10.8181	MES_0
klf8	zgc:153911	0.0358402	0.0358402	3.93107e-11	10.4055	MES_0
dlx4a	rbp4	-0.0358203	0.0358203	1.29021e-11	10.8893	MES_0
runx3	spon2a	-0.0358055	0.0358055	4.87125e-14	13.3124	MES_0
meis3	frem2a	0.0358041	0.0358041	2.48212e-07	6.60518	MES_0
rxraa	krt94	0.0357797	0.0357797	1.47281e-12	11.8319	MES_0
hmga2	cldnb	-0.0357775	0.0357775	9.25433e-10	9.03366	MES_0
meox2a	col11a1a	0.035763	0.035763	7.44602e-07	6.12808	MES_0
nkx3-1	col4a5	-0.0357481	0.0357481	7.94835e-14	13.0997	MES_0
runx1	slit2	0.0357255	0.0357255	1.55272e-09	8.80891	MES_0
fosl1a	fosb	0.035717	0.035717	9.43582e-14	13.0252	MES_0
lmx1ba	sema6e	0.0357118	0.0357118	1.59979e-07	6.79594	MES_0
pbx3b	asip2b	-0.0356868	0.0356868	2.17564e-15	14.6624	MES_0
rfx2	epcam	0.0356858	0.0356858	4.29693e-09	8.36684	MES_0
hmga2	zgc:193505	-0.0356601	0.0356601	2.2386e-11	10.65	MES_0
hnf4g	krt94	-0.0356565	0.0356565	4.91815e-07	6.3082	MES_0
nfatc1	klhl4	-0.0355759	0.0355759	4.15296e-13	12.3816	MES_0
foxo1b	cd74b	0.0355511	0.0355511	3.32066e-09	8.47878	MES_0
dlx4a	rbms3	-0.0355382	0.0355382	1.25645e-10	9.90086	MES_0
klf2a	f3b	-0.0355326	0.0355326	5.89539e-07	6.22949	MES_0
lmx1ba	aopep	0.0355326	0.0355326	2.40485e-05	4.61891	MES_0
twist1a	klf12a	-0.0355299	0.0355299	2.56655e-09	8.59065	MES_0
bach2b	nrg1	0.0355094	0.0355094	1.98723e-15	14.7018	MES_0
klf6a	tph1b	0.035491	0.035491	1.75119e-07	6.75667	MES_0
mafk	chsy1	-0.0354652	0.0354652	3.61832e-15	14.4415	MES_0
jdp2b	pkp3a	-0.0354421	0.0354421	4.74748e-11	10.3235	MES_0
lmx1ba	nt5e	0.0354328	0.0354328	1.47901e-12	11.83	MES_0
bhlhe40	dhrs13a.2	0.035432	0.035432	2.52477e-09	8.59778	MES_0
elf3	tcnbb	0.0354214	0.0354214	2.02055e-10	9.69453	MES_0
foxp1b	notch3	0.0353991	0.0353991	1.01845e-10	9.99206	MES_0
arid5b	aste1a	-0.035398	0.035398	7.14938e-11	10.1457	MES_0
ches1	pdlim7	0.0353869	0.0353869	2.37538e-11	10.6243	MES_0
nfatc1	si:ch211-243a20.3	0.035373	0.035373	2.26844e-11	10.6443	MES_0
tcf7l1b	pdgfrb	-0.0353611	0.0353611	1.68533e-05	4.77332	MES_0
runx2a	robo1	0.0353553	0.0353553	1.21376e-14	13.9159	MES_0
foxo1a	igfbp5b	-0.0353544	0.0353544	8.50395e-10	9.07038	MES_0
pknox2	tp63	-0.0353424	0.0353424	6.0041e-08	7.22155	MES_0
nr1d2a	serpine1	0.0353405	0.0353405	1.94275e-14	13.7116	MES_0
klf12a	serpinh1b	-0.0353341	0.0353341	1.39443e-11	10.8556	MES_0
nr4a3	rbp4	-0.0353064	0.0353064	6.78997e-08	7.16813	MES_0
jun	plod2	0.035302	0.035302	1.35237e-10	9.8689	MES_0
mef2cb	si:ch211-156j16.1	0.0352442	0.0352442	2.28189e-09	8.6417	MES_0
dlx4a	krt93	0.0352403	0.0352403	6.76728e-11	10.1696	MES_0
ches1	itga5	0.0352396	0.0352396	3.40391e-11	10.468	MES_0
fosl1a	jupa	0.0352355	0.0352355	3.49473e-11	10.4566	MES_0
dlx4a	nppc	0.0352007	0.0352007	3.602e-10	9.44346	MES_0
meox2a	phlda2	0.0351982	0.0351982	3.20302e-08	7.49444	MES_0
nr4a3	fstb	-0.0351675	0.0351675	9.42317e-13	12.0258	MES_0
foxp4	mhc1uba	0.0351543	0.0351543	5.15026e-09	8.28817	MES_0
nr4a3	ntn1a	-0.0351417	0.0351417	4.13246e-10	9.38379	MES_0
gfi1b	agr1	-0.0351417	0.0351417	1.42603e-11	10.8459	MES_0
pknox2	nfatc1	0.035092	0.035092	1.68077e-10	9.77449	MES_0
dlx4a	c1qtnf5	0.0350742	0.0350742	5.84758e-11	10.233	MES_0
meis3	col10a1a	0.035072	0.035072	6.99299e-08	7.15534	MES_0
tp63	tnfrsf18	0.0350715	0.0350715	9.82709e-13	12.0076	MES_0
sox6	nrg1	0.0350455	0.0350455	1.14979e-11	10.9394	MES_0
fosl1a	midn	0.0350175	0.0350175	3.84477e-12	11.4151	MES_0
foxp1b	epcam	0.0350075	0.0350075	1.97325e-11	10.7048	MES_0
lmx1ba	vcana	-0.0350075	0.0350075	1.85223e-11	10.7323	MES_0
hmga2	f3a	0.0350051	0.0350051	7.89067e-10	9.10289	MES_0
sox6	frem2b	0.0350038	0.0350038	5.65173e-10	9.24782	MES_0
meox2a	entpd1	0.0349571	0.0349571	2.57371e-06	5.58944	MES_0
grhl2a	cd74b	0.0349413	0.0349413	8.8822e-12	11.0515	MES_0
nfia	bmpr1ba	0.0349315	0.0349315	6.25082e-11	10.2041	MES_0
heyl	cygb1	-0.0348981	0.0348981	2.96103e-08	7.52856	MES_0
egr1	rfx2	0.0348938	0.0348938	8.60744e-10	9.06513	MES_0
fosb	btg2	0.0348889	0.0348889	2.51588e-10	9.59931	MES_0
raraa	crabp1b	0.0348785	0.0348785	2.12371e-11	10.6729	MES_0
arid5b	fstb	-0.0348405	0.0348405	1.40473e-11	10.8524	MES_0
nr4a1	perp	0.0348314	0.0348314	7.86373e-08	7.10437	MES_0
pbx3b	sema4ba	-0.0348148	0.0348148	2.83189e-13	12.5479	MES_0
dlx4a	ephb2b	-0.0347626	0.0347626	3.80001e-14	13.4202	MES_0
foxo1b	tjp3	0.0347552	0.0347552	5.81662e-12	11.2353	MES_0
runx2b	runx2a	0.0347484	0.0347484	9.83384e-14	13.0073	MES_0
gli2b	enam	0.0347324	0.0347324	4.75326e-06	5.32301	MES_0
gli2b	mtss1la	0.0347308	0.0347308	3.63685e-15	14.4393	MES_0
egr1	cldni	-0.0346978	0.0346978	1.07941e-11	10.9668	MES_0
stat3	vcana	-0.0346803	0.0346803	4.3503e-10	9.36148	MES_0
klf7a	ccn1	-0.0346696	0.0346696	9.05292e-10	9.04321	MES_0
dlx4a	cxcl12a	-0.0346469	0.0346469	4.52874e-10	9.34402	MES_0
raraa	cx43	-0.0346434	0.0346434	9.07136e-09	8.04233	MES_0
dmrt1	pard6b	0.0346434	0.0346434	2.35361e-10	9.62827	MES_0
tcf7l2	cobll1b	0.0346409	0.0346409	4.38289e-12	11.3582	MES_0
junba	krt15	0.0346327	0.0346327	2.19943e-12	11.6577	MES_0
runx3	c1qtnf5	0.0346273	0.0346273	5.61399e-08	7.25073	MES_0
fosb	cldni	-0.0346177	0.0346177	6.07998e-09	8.2161	MES_0
runx2b	myh9a	-0.0346129	0.0346129	2.03096e-06	5.6923	MES_0
elf3	tmsb4x	-0.034612	0.034612	8.08435e-15	14.0924	MES_0
dlx6a	rgs5a	-0.0345952	0.0345952	9.1228e-10	9.03987	MES_0
egr1	chst11	-0.0345763	0.0345763	2.32838e-10	9.63295	MES_0
nr4a1	zgc:152791	0.034567	0.034567	3.8781e-11	10.4114	MES_0
nfixb	angptl1a	-0.0345241	0.0345241	5.63848e-13	12.2488	MES_0
klf8	htra1b	-0.0345233	0.0345233	2.12076e-13	12.6735	MES_0
ches1	dachd	0.0344974	0.0344974	1.5616e-09	8.80643	MES_0
fosb	lrmda	-0.0344906	0.0344906	2.07689e-08	7.68259	MES_0
fosab	nid1b	-0.0344815	0.0344815	4.46621e-10	9.35006	MES_0
gli2a	alpi.1	0.0344702	0.0344702	5.43098e-07	6.26512	MES_0
dlx6a	nid1b	-0.03444	0.03444	3.73496e-13	12.4277	MES_0
raraa	ecrg4a	-0.0344314	0.0344314	0.000867822	3.06157	MES_0
lhx9	and1	0.0344103	0.0344103	6.87072e-06	5.163	MES_0
twist1a	krt18a.1	0.0343748	0.0343748	4.03603e-12	11.394	MES_0
nfatc1	hmcn1	0.034362	0.034362	2.8187e-09	8.54995	MES_0
foxo1a	slc40a1	0.0343596	0.0343596	1.33521e-14	13.8745	MES_0
atf3	angptl2b	-0.0343469	0.0343469	2.60058e-13	12.5849	MES_0
atf3	f3b	0.0343079	0.0343079	9.10513e-11	10.0407	MES_0
foxp4	lepb	0.0342936	0.0342936	6.33895e-08	7.19798	MES_0
creb5b	mdka	0.0342908	0.0342908	2.17461e-08	7.66262	MES_0
thrab	elovl1a	0.0342845	0.0342845	5.09907e-10	9.29251	MES_0
her6	col1a1b	0.0342817	0.0342817	3.21168e-12	11.4933	MES_0
foxo1b	fgfr1b	-0.0342805	0.0342805	5.25826e-13	12.2792	MES_0
jun	fosb	0.0342802	0.0342802	2.20857e-14	13.6559	MES_0
foxo1b	bicdl2l	0.0342708	0.0342708	2.94427e-14	13.531	MES_0
hmga2	f13a1b	0.0342573	0.0342573	2.31601e-12	11.6353	MES_0
foxp4	frem3	0.034246	0.034246	2.16374e-08	7.6648	MES_0
her6	kremen1	0.0341904	0.0341904	7.82851e-13	12.1063	MES_0
foxp4	osbpl3a	0.0341654	0.0341654	1.07906e-12	11.967	MES_0
pbx3b	vcana	-0.0341645	0.0341645	4.88994e-15	14.3107	MES_0
mafk	apoeb	-0.0341625	0.0341625	2.67236e-11	10.5731	MES_0
runx1	spon2a	0.0341582	0.0341582	9.21247e-11	10.0356	MES_0
klf7a	epcam	-0.0341495	0.0341495	2.05113e-09	8.68801	MES_0
rarab	adam8a	-0.0341474	0.0341474	2.22341e-09	8.65298	MES_0
dlx4a	si:ch211-157c3.4	0.034144	0.034144	2.52431e-07	6.59786	MES_0
lhx9	thbs4b	0.0341311	0.0341311	7.1368e-09	8.1465	MES_0
bhlhe40	loxa	0.0341301	0.0341301	2.19403e-16	15.6588	MES_0
klf7a	dkk2	-0.0341	0.0341	4.14036e-16	15.383	MES_0
jun	olfml2ba	-0.0340837	0.0340837	2.1176e-11	10.6742	MES_0
stat3	gli2a	-0.0340635	0.0340635	1.44967e-09	8.83873	MES_0
lmx1ba	robo1	-0.0340447	0.0340447	9.27834e-15	14.0325	MES_0
nr4a3	ccdc80	0.0340332	0.0340332	8.89524e-10	9.05084	MES_0
hmga2	macc1	-0.0340329	0.0340329	7.27248e-10	9.13832	MES_0
tfeb	pkp3a	0.0340308	0.0340308	1.54283e-08	7.81168	MES_0
nr1d2a	ephb2b	0.0340269	0.0340269	3.35287e-12	11.4746	MES_0
nfixb	ano1	0.0340194	0.0340194	5.00555e-07	6.30055	MES_0
fosb	nid1b	-0.0340119	0.0340119	7.23305e-08	7.14068	MES_0
fosl1a	rbms3	0.0339988	0.0339988	6.27068e-08	7.20269	MES_0
runx2a	cldna	0.0339973	0.0339973	1.06578e-07	6.97233	MES_0
bhlhe40	c1qtnf5	-0.033991	0.033991	1.49439e-07	6.82554	MES_0
hmga2	mmp30	0.0339731	0.0339731	1.7047e-10	9.76835	MES_0
thrab	itgb4	0.0339619	0.0339619	9.50901e-07	6.02186	MES_0
nfatc1	perp	-0.0339004	0.0339004	1.25855e-05	4.90013	MES_0
rfx2	cxcl18b	-0.0338894	0.0338894	6.05754e-12	11.2177	MES_0
junba	fosab	0.0338691	0.0338691	1.86364e-11	10.7296	MES_0
spi1b	paqr5b	0.0338666	0.0338666	5.65908e-14	13.2473	MES_0
atf3	mmp2	-0.0338562	0.0338562	1.58862e-10	9.79898	MES_0
nkx3-1	ampd3b	0.0338562	0.0338562	1.31579e-14	13.8808	MES_0
arid3a	ptgdsb.1	-0.0338383	0.0338383	1.66767e-09	8.77789	MES_0
alx4a	socs3a	-0.0338243	0.0338243	3.05456e-08	7.51505	MES_0
dlx4a	serpine1	-0.0338077	0.0338077	5.03008e-10	9.29842	MES_0
nr4a1	bcam	0.033799	0.033799	5.05854e-10	9.29597	MES_0
fosl1a	dennd4a	0.0337836	0.0337836	5.34826e-11	10.2718	MES_0
tcf7l2	vcana	-0.0337803	0.0337803	1.07775e-10	9.96748	MES_0
mef2cb	itga11a	-0.0337703	0.0337703	2.06247e-11	10.6856	MES_0
tcf7l2	krt91	0.0337703	0.0337703	3.80573e-06	5.41956	MES_0
trps1	rbp4	0.0337572	0.0337572	2.48631e-08	7.60444	MES_0
cux1a	raly	-0.0337535	0.0337535	6.4977e-12	11.1872	MES_0
nr4a1	cav1	0.033744	0.033744	8.52525e-14	13.0693	MES_0
pgr	cygb1	-0.0337393	0.0337393	2.27423e-11	10.6432	MES_0
fosb	plod2	-0.0337318	0.0337318	3.09195e-10	9.50977	MES_0
ar	klf8	0.0337281	0.0337281	2.10758e-13	12.6762	MES_0
elf3	ptgis	0.0337255	0.0337255	2.51937e-10	9.59871	MES_0
foxp4	asap3	0.033722	0.033722	1.28528e-07	6.891	MES_0
rarab	entpd1	0.0337012	0.0337012	6.69757e-09	8.17408	MES_0
stat3	entpd1	0.0336892	0.0336892	3.98376e-08	7.39971	MES_0
cux1a	aspn	0.0336881	0.0336881	1.49748e-10	9.82464	MES_0
mafk	tuft1a	0.0336801	0.0336801	7.45832e-13	12.1274	MES_0
hlfa	zgc:152670	0.0336626	0.0336626	1.27729e-15	14.8937	MES_0
fosb	ephb2b	-0.0336618	0.0336618	3.72653e-07	6.42869	MES_0
klf12a	fstl1a	0.0336524	0.0336524	1.23362e-14	13.9088	MES_0
klf12a	chst11	0.0336439	0.0336439	5.63666e-11	10.249	MES_0
nr4a1	fstl3	0.0336404	0.0336404	2.59548e-11	10.5858	MES_0
lmx1ba	cav1	-0.0336365	0.0336365	3.08621e-18	17.5106	MES_0
meox2a	enam	0.0336279	0.0336279	3.08694e-08	7.51047	MES_0
mitfa	ptgdsb.1	0.033605	0.033605	6.6424e-15	14.1777	MES_0
klf12a	si:busm1-57f23.1	-0.0336026	0.0336026	3.77163e-05	4.42347	MES_0
klf6a	gig2l	0.0335849	0.0335849	3.85429e-17	16.4141	MES_0
arid5b	furina	0.0335769	0.0335769	2.38038e-12	11.6234	MES_0
nr4a1	adam8a	-0.0335743	0.0335743	2.72605e-05	4.56447	MES_0
runx1	krt94	0.0335638	0.0335638	2.60752e-10	9.58377	MES_0
jun	dusp1	0.0335533	0.0335533	9.26439e-14	13.0332	MES_0
runx3	robo1	0.0335455	0.0335455	8.55685e-09	8.06769	MES_0
thrab	nrg1	0.0335376	0.0335376	2.21102e-06	5.65541	MES_0
klf8	malb	0.0335219	0.0335219	2.1288e-09	8.67187	MES_0
tfeb	cxadr	0.033512	0.033512	9.00489e-17	16.0455	MES_0
pknox2	fstl1a	-0.033507	0.033507	9.64636e-11	10.0156	MES_0
bhlhe40	vcana	-0.0334852	0.0334852	6.25201e-11	10.204	MES_0
nfia	rbms3	0.0334804	0.0334804	6.59476e-14	13.1808	MES_0
cebpd	selenop	0.0334715	0.0334715	4.96899e-10	9.30373	MES_0
atf3	rbp4	0.0334639	0.0334639	2.95949e-10	9.52878	MES_0
fosab	postnb	-0.0334618	0.0334618	4.70521e-11	10.3274	MES_0
pknox2	f3b	0.0334452	0.0334452	4.59122e-07	6.33807	MES_0
foxp4	klf8	0.0334264	0.0334264	7.038e-10	9.15255	MES_0
ebf3a	tnfaip6	0.0334074	0.0334074	3.71619e-06	5.4299	MES_0
thrab	macc1	0.0333732	0.0333732	1.64272e-09	8.78444	MES_0
klf7a	eppk1	-0.0333728	0.0333728	2.62742e-10	9.58047	MES_0
jun	crip1	0.0333579	0.0333579	2.79054e-11	10.5543	MES_0
pknox2	serpine1	0.0333554	0.0333554	4.41792e-12	11.3548	MES_0
nfia	krt94	-0.0333542	0.0333542	1.80722e-09	8.74299	MES_0
foxo1a	rps24	-0.0333441	0.0333441	2.42143e-09	8.61593	MES_0
rarab	apoeb	-0.0333434	0.0333434	2.08721e-11	10.6804	MES_0
hey2	lama5	-0.033336	0.033336	1.63122e-10	9.78749	MES_0
grhl2a	si:ch211-79k12.1	0.0333345	0.0333345	6.52571e-13	12.1854	MES_0
nfatc1	hbegfa	0.0333132	0.0333132	3.67762e-09	8.43443	MES_0
ches1	fstl1a	0.0332929	0.0332929	4.17884e-13	12.3789	MES_0
foxp4	fosb	-0.033244	0.033244	1.18485e-11	10.9263	MES_0
hmga2	scinla	0.0332344	0.0332344	4.67458e-11	10.3303	MES_0
foxo3b	cldne	0.0332307	0.0332307	1.15621e-08	7.93696	MES_0
pknox2	enam	-0.0332299	0.0332299	1.16254e-08	7.93459	MES_0
nr4a1	htra1a	-0.0332288	0.0332288	2.12507e-07	6.67263	MES_0
glis1a	cd248a	0.033227	0.033227	1.69234e-13	12.7715	MES_0
mef2cb	apoeb	-0.0332158	0.0332158	4.34639e-09	8.36187	MES_0
rarab	and2	-0.0332126	0.0332126	2.3017e-07	6.63795	MES_0
klf6a	krt4	0.0331992	0.0331992	1.82141e-15	14.7396	MES_0
mafk	sema6e	-0.0331917	0.0331917	3.54137e-09	8.45083	MES_0
nr4a1	wnt5b	-0.033188	0.033188	4.18255e-11	10.3786	MES_0
lmx1ba	and1	-0.0331842	0.0331842	1.50313e-05	4.823	MES_0
nfixb	abi3bpb	-0.03318	0.03318	6.60161e-11	10.1803	MES_0
fosb	abi3bpb	0.0331644	0.0331644	3.44659e-07	6.46261	MES_0
fosb	nedd9	0.0331432	0.0331432	5.93475e-08	7.2266	MES_0
pknox2	niban1a	0.0331425	0.0331425	3.12578e-10	9.50504	MES_0
egr1	thbs4b	0.0331402	0.0331402	2.39108e-06	5.62141	MES_0
tcf7l2	tenm3	0.0331397	0.0331397	1.24757e-08	7.90393	MES_0
runx3	tjp3	0.0331397	0.0331397	9.83569e-11	10.0072	MES_0
elf3	osbpl3a	0.0331372	0.0331372	6.85594e-15	14.1639	MES_0
tp63	ripor2	0.0331178	0.0331178	1.72306e-14	13.7637	MES_0
nr1d4b	fn1b	0.0331025	0.0331025	3.46363e-09	8.46047	MES_0
nr1d2a	hsp70l	0.0330952	0.0330952	1.66388e-15	14.7789	MES_0
foxo3b	klhl4	0.0330812	0.0330812	6.1553e-15	14.2108	MES_0
twist1a	acsl4b	-0.03306	0.03306	2.25961e-12	11.646	MES_0
hnf4g	f3b	-0.0330364	0.0330364	1.88106e-08	7.7256	MES_0
raraa	fn1a	-0.0330281	0.0330281	6.19724e-09	8.2078	MES_0
hmga2	enam	0.0330049	0.0330049	4.76522e-08	7.32192	MES_0
gfi1b	scinla	0.0329873	0.0329873	3.78587e-12	11.4218	MES_0
thrab	macrod2	0.0329865	0.0329865	1.00027e-08	7.99988	MES_0
raraa	ccl25b	0.0329723	0.0329723	2.57188e-06	5.58975	MES_0
ches1	trps1	-0.0329304	0.0329304	1.01924e-09	8.99172	MES_0
foxp1b	myh9a	0.0329272	0.0329272	2.58693e-06	5.58722	MES_0
nfatc1	col27a1b	-0.0329209	0.0329209	1.13718e-10	9.94417	MES_0
foxp4	sox6	0.0329193	0.0329193	3.15263e-11	10.5013	MES_0
foxp4	cldn7b	0.0329004	0.0329004	2.86972e-10	9.54216	MES_0
nr1d2a	aebp1	0.0328934	0.0328934	1.43276e-09	8.84383	MES_0
rorc	krt94	0.0328795	0.0328795	6.19888e-06	5.20769	MES_0
lef1	aste1a	-0.032875	0.032875	1.67858e-11	10.7751	MES_0
fosb	ptgdsb.2	0.032873	0.032873	9.34527e-14	13.0294	MES_0
nr1d2a	bhmt	0.0328707	0.0328707	1.0103e-08	7.99555	MES_0
junba	dkk3b	-0.0328675	0.0328675	0.000336684	3.47278	MES_0
thrab	ptgdsb.1	0.0328648	0.0328648	3.51124e-06	5.45454	MES_0
ches1	cldne	-0.0328496	0.0328496	8.40812e-08	7.0753	MES_0
pbx1a	abi3bpb	0.0328468	0.0328468	3.45013e-10	9.46216	MES_0
arid5b	ezrb	-0.0328191	0.0328191	3.70926e-10	9.43071	MES_0
foxo1a	zgc:111983	0.0327931	0.0327931	9.73619e-11	10.0116	MES_0
junba	angptl1a	0.0327884	0.0327884	3.21838e-11	10.4924	MES_0
gli2a	igsf3	0.0327839	0.0327839	1.43685e-14	13.8426	MES_0
rarab	mdka	-0.0327758	0.0327758	9.10289e-08	7.04082	MES_0
nr4a3	hopx	0.0327703	0.0327703	3.55907e-17	16.4487	MES_0
fosl1a	nedd9	0.0327687	0.0327687	4.8667e-09	8.31277	MES_0
alx4a	serpinh1b	0.0327254	0.0327254	6.35681e-16	15.1968	MES_0
jun	elovl1a	0.0326717	0.0326717	2.80889e-11	10.5515	MES_0
rfx2	col1a2	-0.0326682	0.0326682	8.83368e-12	11.0539	MES_0
nr4a1	nrg1	0.0326553	0.0326553	8.31592e-09	8.08009	MES_0
raraa	rbp4	0.03265	0.03265	8.10828e-09	8.09107	MES_0
rxraa	fn1b	0.0326492	0.0326492	1.79583e-06	5.74574	MES_0
alx4a	enam	0.0326488	0.0326488	1.10386e-08	7.95709	MES_0
klf15	ccn2a	0.0326404	0.0326404	3.7215e-07	6.42928	MES_0
rfx2	ccdc80	-0.0325939	0.0325939	2.45693e-08	7.60961	MES_0
klf8	pah	-0.0325844	0.0325844	2.86871e-11	10.5423	MES_0
dlx4a	cldne	0.0325833	0.0325833	8.30719e-07	6.08055	MES_0
alx4a	lamb1a	0.0325753	0.0325753	6.07205e-12	11.2167	MES_0
nr4a1	zgc:136930	0.0325517	0.0325517	1.23121e-18	17.9097	MES_0
twist2	f5	-0.0325499	0.0325499	2.35586e-07	6.62785	MES_0
nr4a1	lima1a	0.0325427	0.0325427	1.58561e-08	7.7998	MES_0
sox9a	aqp3a	-0.0325404	0.0325404	2.08532e-09	8.68083	MES_0
foxp1b	cst14b.1	0.0325387	0.0325387	9.2384e-14	13.0344	MES_0
klf12b	itgb4	0.0325287	0.0325287	5.82759e-06	5.23451	MES_0
rfx2	lmna	0.0325271	0.0325271	7.60286e-11	10.119	MES_0
jdp2b	pmp22b	0.0325027	0.0325027	4.75412e-08	7.32293	MES_0
dlx6a	smoc1	-0.0324998	0.0324998	1.43414e-10	9.84341	MES_0
hmga2	zgc:111983	-0.0324909	0.0324909	2.08787e-09	8.6803	MES_0
ches1	pdgfrb	0.0324883	0.0324883	8.2664e-08	7.08268	MES_0
lmx1ba	rgs5a	0.0324653	0.0324653	1.12833e-05	4.94756	MES_0
ar	cldna	0.0324584	0.0324584	6.94922e-12	11.1581	MES_0
elf3	actn4	0.0324416	0.0324416	7.0799e-10	9.14997	MES_0
klf15	sort1a	0.032436	0.032436	7.83407e-11	10.106	MES_0
sp7	cldne	0.0324315	0.0324315	9.16488e-08	7.03787	MES_0
ebf3a	pknox2	-0.0324186	0.0324186	8.99895e-09	8.04581	MES_0
lef1	ccn1	0.0324062	0.0324062	4.11994e-10	9.38511	MES_0
klf8	epha7	0.0324019	0.0324019	2.28114e-09	8.64185	MES_0
thrab	si:busm1-57f23.1	0.0323972	0.0323972	6.53348e-09	8.18486	MES_0
cux1a	cav1	-0.0323612	0.0323612	9.53003e-12	11.0209	MES_0
dlx6a	fn1b	0.0323557	0.0323557	8.94384e-05	4.04848	MES_0
foxo1b	mid1ip1a	0.0323421	0.0323421	5.40077e-12	11.2675	MES_0
egr1	robo1	-0.0323384	0.0323384	1.76664e-07	6.75285	MES_0
alx4a	thbs4b	0.0323361	0.0323361	4.99594e-08	7.30138	MES_0
alx4a	aspn	-0.0323327	0.0323327	1.72397e-14	13.7635	MES_0
rfx2	loxa	-0.0323166	0.0323166	4.56102e-14	13.3409	MES_0
klf12b	dsc2l	-0.0323046	0.0323046	1.60248e-12	11.7952	MES_0
klf12a	bcl2a	0.0322694	0.0322694	1.64902e-13	12.7828	MES_0
runx1	svila	0.0322566	0.0322566	2.8944e-11	10.5384	MES_0
bhlhe40	cxadr	0.032244	0.032244	1.50183e-09	8.82338	MES_0
bhlhe40	pdlim7	0.0322375	0.0322375	1.3227e-09	8.87854	MES_0
fosb	pah	0.0322323	0.0322323	1.32626e-10	9.87737	MES_0
sox6	f3a	0.0322202	0.0322202	1.10997e-08	7.95469	MES_0
bhlhe40	sema4ba	0.0322112	0.0322112	8.73528e-11	10.0587	MES_0
pknox2	epcam	-0.0321946	0.0321946	3.77384e-11	10.4232	MES_0
rfx2	aste1a	0.0321891	0.0321891	1.17038e-14	13.9317	MES_0
creb3l3b	pah	0.0321619	0.0321619	4.16492e-12	11.3804	MES_0
elf3	zgc:153911	0.0321504	0.0321504	2.06522e-11	10.685	MES_0
cux1a	arhgef1b	0.0321394	0.0321394	1.55512e-09	8.80824	MES_0
sox9a	igf2b	0.0321381	0.0321381	2.03015e-10	9.69247	MES_0
nfixa	postnb	0.03211	0.03211	1.46675e-07	6.83364	MES_0
dlx4a	and1	-0.0321049	0.0321049	0.000218321	3.6609	MES_0
foxo1b	ugt5f1	0.0321017	0.0321017	2.73152e-11	10.5636	MES_0
foxo1a	evpla	0.0320989	0.0320989	4.57161e-14	13.3399	MES_0
dmrt1	gmds	0.0320887	0.0320887	8.45406e-14	13.0729	MES_0
hlfa	cldni	0.032082	0.032082	4.31023e-10	9.3655	MES_0
foxp1b	jupa	0.0320788	0.0320788	2.39467e-10	9.62076	MES_0
dlx4a	zgc:153665	0.0320653	0.0320653	2.91001e-07	6.53611	MES_0
egr4	chst11	0.0320437	0.0320437	1.25399e-09	8.9017	MES_0
runx3	degs2	0.0320007	0.0320007	1.57316e-13	12.8032	MES_0
alx4a	mmp2	0.0319849	0.0319849	7.0541e-09	8.15156	MES_0
hey2	spns2	0.0319613	0.0319613	1.20349e-12	11.9196	MES_0
tcf7l2	ephb2b	0.0319535	0.0319535	2.02429e-10	9.69373	MES_0
nr4a3	epha7	0.0319409	0.0319409	1.39047e-10	9.85684	MES_0
fosl1a	rps27l	-0.0319282	0.0319282	6.54923e-15	14.1838	MES_0
ches1	abi3bpb	0.0319272	0.0319272	2.80396e-10	9.55223	MES_0
klf8	serpinh1b	-0.0319246	0.0319246	2.41975e-12	11.6162	MES_0
mafk	rps23	-0.0319244	0.0319244	6.56388e-12	11.1828	MES_0
fosab	cntfr	-0.03192	0.03192	1.14195e-12	11.9424	MES_0
foxo1b	soul2	0.031887	0.031887	2.17629e-12	11.6623	MES_0
ar	klf4	0.0318786	0.0318786	5.59327e-10	9.25233	MES_0
egr4	bhmt	-0.0318756	0.0318756	2.0962e-09	8.67857	MES_0
foxo3b	malb	0.0318571	0.0318571	1.46417e-10	9.83441	MES_0
runx3	tgm5l	0.03185	0.03185	2.58011e-08	7.58836	MES_0
dlx4a	ptgdsb.1	-0.031838	0.031838	1.15884e-09	8.93598	MES_0
klf12a	epcam	-0.0318035	0.0318035	2.10645e-11	10.6764	MES_0
sox6	pfn1	0.0317823	0.0317823	2.38017e-12	11.6234	MES_0
cux1a	ntn1a	-0.0317797	0.0317797	2.31474e-09	8.6355	MES_0
elf3	lrmda	0.0317774	0.0317774	5.94465e-11	10.2259	MES_0
klf8	col1a1b	-0.0317735	0.0317735	5.26549e-11	10.2786	MES_0
gfi1b	cyp26b1	0.0317309	0.0317309	9.70533e-09	8.01299	MES_0
nr1d2a	sfrp2	0.031724	0.031724	2.13276e-09	8.67106	MES_0
nfatc1	olfml2ba	0.0317091	0.0317091	2.93233e-14	13.5328	MES_0
junba	nedd9	0.0316803	0.0316803	7.65964e-08	7.11579	MES_0
junba	phlda2	0.0316785	0.0316785	4.29825e-07	6.36671	MES_0
sox6	col11a1a	-0.0316761	0.0316761	3.23965e-07	6.4895	MES_0
runx3	cldni	-0.0316211	0.0316211	6.32502e-08	7.19894	MES_0
klf6a	igfbp5b	0.0316071	0.0316071	4.86615e-10	9.31281	MES_0
mafk	aspn	-0.0316048	0.0316048	2.70291e-08	7.56817	MES_0
runx2b	bhmt	0.0316047	0.0316047	1.21739e-12	11.9146	MES_0
creb3l3b	add3a	0.0316045	0.0316045	3.92207e-17	16.4065	MES_0
nfixa	bmpr1ba	0.0316024	0.0316024	3.18544e-10	9.49683	MES_0
bach2b	bcam	0.0315895	0.0315895	1.25075e-10	9.90283	MES_0
nfic	klf6a	-0.0315493	0.0315493	2.04801e-08	7.68867	MES_0
stat3	zgc:152791	0.0315466	0.0315466	3.90703e-11	10.4082	MES_0
foxp4	tspan18b	0.0315458	0.0315458	3.2919e-12	11.4826	MES_0
lmx1ba	macc1	0.0315422	0.0315422	2.10433e-11	10.6769	MES_0
nr1d2a	tp63	-0.0315353	0.0315353	2.52369e-08	7.59796	MES_0
nr1d2a	cobll1b	-0.0315278	0.0315278	1.44753e-11	10.8394	MES_0
klf12b	zgc:153665	-0.0315263	0.0315263	7.89715e-11	10.1025	MES_0
elf3	col1a1b	-0.031516	0.031516	5.01755e-14	13.2995	MES_0
rarab	nectin1b	-0.0315046	0.0315046	1.58388e-09	8.80028	MES_0
nr4a3	htra1a	0.0315002	0.0315002	1.05125e-08	7.97829	MES_0
lhx9	hmcn1	0.0314873	0.0314873	4.1945e-10	9.37732	MES_0
alx4a	and1	0.0314743	0.0314743	3.18322e-07	6.49713	MES_0
fosab	f3b	0.0314312	0.0314312	7.65005e-08	7.11634	MES_0
pknox2	npr1a	0.0314192	0.0314192	3.33671e-07	6.47668	MES_0
arid3a	zgc:193505	0.0314172	0.0314172	9.08206e-06	5.04182	MES_0
meox2a	dmrt1	0.0314103	0.0314103	3.64598e-05	4.43819	MES_0
jun	entpd1	-0.0313986	0.0313986	8.36789e-07	6.07738	MES_0
sox6	baiap2a	0.0313863	0.0313863	2.60073e-07	6.5849	MES_0
pknox2	col11a1b	0.0313447	0.0313447	5.07439e-13	12.2946	MES_0
raraa	apoeb	-0.0313431	0.0313431	1.23165e-07	6.90951	MES_0
lmx1ba	thy1	-0.0313408	0.0313408	3.68325e-06	5.43377	MES_0
dlx4a	dhrs13a.2	0.0313117	0.0313117	4.61637e-05	4.3357	MES_0
rarab	robo1	-0.0313001	0.0313001	1.51633e-09	8.81921	MES_0
raraa	smoc1	0.0312996	0.0312996	4.50565e-10	9.34624	MES_0
foxo1a	inhbaa	-0.0312882	0.0312882	4.79569e-07	6.31915	MES_0
klf2a	zgc:153665	0.0312761	0.0312761	9.38555e-07	6.02754	MES_0
alx4a	bhmt	0.031268	0.031268	1.42319e-13	12.8467	MES_0
grhl2a	tnks1bp1	0.0312422	0.0312422	5.44458e-11	10.264	MES_0
tp63	alpi.1	0.0312034	0.0312034	6.53333e-07	6.18487	MES_0
alx4a	fstl1b	0.0311918	0.0311918	1.26671e-10	9.89732	MES_0
runx1	sema3e	0.0311456	0.0311456	4.81893e-13	12.317	MES_0
nr4a3	cdh1	0.0311326	0.0311326	0.000104088	3.9826	MES_0
meox2a	thy1	0.0311296	0.0311296	1.20374e-06	5.91947	MES_0
egr1	asip2b	0.0311216	0.0311216	8.97958e-09	8.04674	MES_0
klf7a	dsc2l	-0.0311153	0.0311153	3.87762e-12	11.4114	MES_0
fosab	frem2a	-0.0310988	0.0310988	1.8703e-11	10.7281	MES_0
zeb1b	adamts15a	0.0310944	0.0310944	1.04461e-13	12.981	MES_0
pknox2	zgc:152791	0.0310943	0.0310943	3.29763e-10	9.4818	MES_0
sox6	klhl4	0.0310858	0.0310858	9.23596e-09	8.03452	MES_0
rxraa	foxo3b	0.0310687	0.0310687	2.63973e-11	10.5784	MES_0
nfixb	tmprss4a	0.0310642	0.0310642	2.68124e-11	10.5717	MES_0
cebpd	zgc:153665	-0.0310591	0.0310591	6.48281e-06	5.18824	MES_0
arid3c	tenm3	-0.0310255	0.0310255	6.68504e-08	7.1749	MES_0
stat3	thbs4b	-0.0310252	0.0310252	2.30147e-07	6.63799	MES_0
gfi1b	notch1a	0.0310244	0.0310244	1.01605e-08	7.99308	MES_0
nr3c2	npr1a	-0.0310097	0.0310097	4.51857e-11	10.345	MES_0
gli2a	c1qtnf5	0.0310011	0.0310011	2.91772e-07	6.53496	MES_0
elf3	bicdl2l	0.0309989	0.0309989	3.58328e-09	8.44572	MES_0
foxo1b	pkp3a	0.0309978	0.0309978	1.06076e-08	7.97438	MES_0
klf2a	inhbaa	0.0309812	0.0309812	4.8108e-09	8.31778	MES_0
klf12a	hmgn2	-0.0309616	0.0309616	3.57854e-14	13.4463	MES_0
rarab	fn1a	0.0309596	0.0309596	5.99046e-09	8.22254	MES_0
foxo1a	dusp5	0.0309566	0.0309566	5.38391e-11	10.2689	MES_0
nr4a3	col17a1a	0.0309535	0.0309535	1.12465e-09	8.94898	MES_0
bach2b	srgn	-0.030939	0.030939	9.97409e-14	13.0011	MES_0
ar	hip1rb	0.0309255	0.0309255	8.84125e-05	4.05349	MES_0
trps1	fgfr1b	0.0309185	0.0309185	5.46159e-09	8.26268	MES_0
hmga2	slit2	0.0309111	0.0309111	2.09603e-11	10.6786	MES_0
im:7142702	csf1a	0.0309049	0.0309049	1.49369e-11	10.8257	MES_0
raraa	jdp2b	0.0308962	0.0308962	1.05105e-10	9.97837	MES_0
ches1	twist2	0.0308949	0.0308949	6.39007e-10	9.19449	MES_0
sox6	zgc:100997	0.0308946	0.0308946	1.24866e-10	9.90355	MES_0
dlx6a	tp63	0.0308917	0.0308917	0.000284236	3.54632	MES_0
rfx2	bcar1	0.0308759	0.0308759	2.02256e-07	6.6941	MES_0
foxo3b	fn1b	0.0308424	0.0308424	1.28548e-09	8.89093	MES_0
thrab	asap3	0.0308368	0.0308368	4.74291e-12	11.324	MES_0
runx1	fhl2a	0.0308323	0.0308323	5.86657e-13	12.2316	MES_0
raraa	ntn1a	0.0308184	0.0308184	1.27271e-10	9.89527	MES_0
lhx9	col10a1a	-0.030807	0.030807	3.00288e-06	5.52246	MES_0
nr4a1	col27a1b	-0.0308041	0.0308041	1.96676e-12	11.7062	MES_0
heyl	crhbp	-0.0307992	0.0307992	6.31048e-09	8.19994	MES_0
fosl1a	dusp5	0.0307881	0.0307881	1.39858e-11	10.8543	MES_0
grhl2a	tnk1	0.0307877	0.0307877	2.00257e-14	13.6984	MES_0
foxo1b	hsd17b12a	0.0307843	0.0307843	1.71695e-06	5.76524	MES_0
nr4a3	gfpt2	0.0307822	0.0307822	2.08404e-13	12.6811	MES_0
hnf4g	tenm3	-0.0307821	0.0307821	2.18291e-06	5.66096	MES_0
klf7a	fosab	-0.0307755	0.0307755	1.1989e-12	11.9212	MES_0
grhl2a	pdlim2	0.030773	0.030773	3.3317e-11	10.4773	MES_0
dlx4a	cxadr	0.0307691	0.0307691	2.62818e-11	10.5803	MES_0
hmga2	evpla	-0.0307239	0.0307239	9.27802e-11	10.0325	MES_0
junba	fstl3	0.0307135	0.0307135	5.10429e-10	9.29206	MES_0
nfixb	pcdh19	-0.0307074	0.0307074	3.42525e-11	10.4653	MES_0
fosl1a	igf2b	-0.0306904	0.0306904	2.02824e-08	7.69288	MES_0
hlfa	crip1	0.0306861	0.0306861	5.36775e-13	12.2702	MES_0
tcf7l1b	alpi.1	0.0306848	0.0306848	1.20124e-08	7.92037	MES_0
ar	postnb	-0.0306777	0.0306777	7.22924e-08	7.14091	MES_0
egr4	tph1b	0.0306708	0.0306708	6.57749e-10	9.18194	MES_0
nr4a3	foxo1b	0.0306594	0.0306594	2.01087e-10	9.69662	MES_0
mef2cb	sema6e	-0.0306558	0.0306558	5.04838e-09	8.29685	MES_0
dlx4a	tfpia	0.0306365	0.0306365	2.15829e-08	7.66589	MES_0
barhl1a	col10a1a	0.0305775	0.0305775	1.50916e-07	6.82127	MES_0
nfia	krt15	0.0305766	0.0305766	2.61771e-11	10.5821	MES_0
grhl2a	krt17	0.0305726	0.0305726	3.39428e-14	13.4693	MES_0
hlfa	apoeb	0.0305636	0.0305636	3.46961e-14	13.4597	MES_0
ches1	rcan2	0.0305631	0.0305631	2.47774e-17	16.6059	MES_0
atf3	tuft1a	0.0305495	0.0305495	4.04631e-12	11.3929	MES_0
mafk	itga11a	-0.0305491	0.0305491	1.345e-11	10.8713	MES_0
nfatc1	thbs4b	0.0305477	0.0305477	8.23115e-06	5.08454	MES_0
nr3c2	fn1a	-0.0305354	0.0305354	6.55758e-06	5.18326	MES_0
spi1b	sema4ba	-0.0305239	0.0305239	7.09652e-12	11.149	MES_0
ches1	cxadr	-0.030505	0.030505	3.15443e-11	10.5011	MES_0
mef2cb	ptgdsb.1	-0.0305023	0.0305023	4.96485e-08	7.30409	MES_0
stat3	pfkfb3	0.0304992	0.0304992	1.32728e-15	14.877	MES_0
zeb1b	spon2a	0.0304869	0.0304869	3.27103e-07	6.48532	MES_0
twist2	klf12a	0.0304827	0.0304827	1.55439e-09	8.80844	MES_0
nr4a3	nfkbiaa	0.0304821	0.0304821	6.18177e-14	13.2089	MES_0
dlx6a	ntn1a	-0.0304809	0.0304809	9.47172e-12	11.0236	MES_0
thrab	spon1b	0.0304737	0.0304737	1.3479e-12	11.8703	MES_0
klf12a	zgc:154058	0.0304687	0.0304687	3.47173e-15	14.4595	MES_0
twist1a	elovl1a	-0.0304595	0.0304595	1.57778e-10	9.80195	MES_0
twist2	ppp1r1b	0.0304566	0.0304566	1.11835e-08	7.95142	MES_0
klf2a	krt4	0.0304444	0.0304444	4.57234e-15	14.3399	MES_0
mafk	krt93	-0.0304253	0.0304253	3.01765e-11	10.5203	MES_0
thrab	ecrg4a	-0.0304217	0.0304217	5.2252e-07	6.2819	MES_0
lmx1ba	ucmaa	-0.0304027	0.0304027	2.12209e-09	8.67324	MES_0
bhlhe40	ppap2d	0.0303951	0.0303951	4.96668e-13	12.3039	MES_0
dlx6a	fstl1b	-0.0303661	0.0303661	7.25567e-08	7.13932	MES_0
nfixa	pcolce2b	-0.0303533	0.0303533	1.10447e-06	5.95685	MES_0
mef2cb	rbms3	-0.0303523	0.0303523	3.17829e-11	10.4978	MES_0
mafk	timp2b	-0.0303253	0.0303253	8.4572e-10	9.07277	MES_0
tbx2a	plch2a	0.0303252	0.0303252	4.08124e-07	6.38921	MES_0
her6	ccdc80	0.030301	0.030301	3.6477e-10	9.43798	MES_0
nr1d2a	perp	-0.0302983	0.0302983	2.06064e-09	8.686	MES_0
tcf7l2	pawr	0.0302828	0.0302828	7.6471e-13	12.1165	MES_0
foxo1a	ccnd2a	0.0302766	0.0302766	1.41666e-12	11.8487	MES_0
fosb	tenm3	0.0302742	0.0302742	4.07233e-09	8.39016	MES_0
jdp2b	epcam	-0.0302692	0.0302692	8.44278e-09	8.07351	MES_0
nfixb	cd74b	0.030269	0.030269	1.5352e-10	9.81383	MES_0
twist1a	s1pr2	-0.0302546	0.0302546	1.88429e-12	11.7249	MES_0
stat3	chmp6b	0.0302493	0.0302493	5.81587e-13	12.2354	MES_0
arid3a	f3a	-0.0302398	0.0302398	3.66243e-09	8.43623	MES_0
tcf7l2	daam1b	0.030239	0.030239	1.6116e-05	4.79274	MES_0
lmx1ba	lama5	-0.0302329	0.0302329	3.99437e-12	11.3986	MES_0
atf3	ccn1	0.0302009	0.0302009	1.29469e-09	8.88783	MES_0
klf7a	numbl	0.0301933	0.0301933	8.69752e-12	11.0606	MES_0
foxp1b	lrmda	0.0301933	0.0301933	2.13108e-10	9.6714	MES_0
nr1d2a	anxa11a	-0.030165	0.030165	9.64532e-15	14.0157	MES_0
alx4a	stat3	-0.0301554	0.0301554	2.17207e-12	11.6631	MES_0
mafk	wnt5b	-0.0301518	0.0301518	2.09801e-13	12.6782	MES_0
bach2b	csf1a	-0.0301459	0.0301459	1.12946e-12	11.9471	MES_0
twist1a	htra1a	-0.030145	0.030145	1.54706e-05	4.81049	MES_0
zgc:91944	tenm3	0.0301427	0.0301427	7.57237e-13	12.1208	MES_0
mef2cb	f3b	-0.0301413	0.0301413	8.36511e-07	6.07753	MES_0
dlx4a	nt5e	-0.0301403	0.0301403	2.86684e-12	11.5426	MES_0
mafk	pah	0.0301365	0.0301365	4.17826e-13	12.379	MES_0
alx4a	fn1a	0.0301197	0.0301197	1.00011e-11	11	MES_0
nfixa	krt91	0.0301097	0.0301097	9.10146e-06	5.04089	MES_0
arid5b	loxl1	0.0301044	0.0301044	1.72941e-11	10.7621	MES_0
raraa	nedd9	0.0300978	0.0300978	2.00769e-09	8.6973	MES_0
junba	ier2b	0.0300953	0.0300953	7.67447e-13	12.115	MES_0
creb5b	disp1	0.0300894	0.0300894	4.31812e-09	8.3647	MES_0
rxraa	igf2b	-0.0300886	0.0300886	1.46308e-09	8.83473	MES_0
foxo1a	rnf213a	0.0300878	0.0300878	5.01137e-10	9.30004	MES_0
atf3	si:dkey-221j11.3	0.030068	0.030068	3.58144e-10	9.44594	MES_0
elf3	c1qtnf5	-0.0300672	0.0300672	2.46233e-10	9.60865	MES_0
bach2b	myh9a	0.03006	0.03006	5.58031e-09	8.25334	MES_0
egr4	inhbaa	0.030042	0.030042	7.49821e-10	9.12504	MES_0
foxp4	aspn	0.0300328	0.0300328	1.39791e-08	7.85452	MES_0
klf6a	f3a	-0.0300306	0.0300306	7.69502e-09	8.11379	MES_0
tfeb	ptprfb	0.0300131	0.0300131	1.07129e-07	6.97009	MES_0
nr4a3	itga9	-0.0300119	0.0300119	6.47565e-11	10.1887	MES_0
cebpd	sdc4	0.0300062	0.0300062	1.40606e-11	10.852	MES_0
sox6	tnfrsf9a	0.0299986	0.0299986	3.6988e-14	13.4319	MES_0
rfx2	trps1	0.0299894	0.0299894	3.26807e-10	9.48571	MES_0
barhl1a	ecrg4a	0.029931	0.029931	6.13036e-06	5.21251	MES_0
wt1b	entpd1	-0.0299285	0.0299285	7.01191e-15	14.1542	MES_0
fosab	mmp2	-0.0299156	0.0299156	3.12473e-11	10.5052	MES_0
klf7a	htra1b	-0.0298889	0.0298889	6.40562e-10	9.19344	MES_0
foxp4	lum	-0.0298725	0.0298725	1.93625e-05	4.71304	MES_0
klf7a	f3b	0.0298713	0.0298713	1.83832e-07	6.73558	MES_0
ebf1b	fn1a	-0.0298664	0.0298664	1.32923e-10	9.8764	MES_0
raraa	pdzrn3b	0.0298567	0.0298567	1.06992e-07	6.97065	MES_0
gfi1b	baiap2l1a	-0.0298493	0.0298493	2.89699e-13	12.5381	MES_0
alx4a	dkk3b	-0.0298487	0.0298487	1.88429e-09	8.72485	MES_0
cebpd	svila	0.0298316	0.0298316	1.72036e-14	13.7644	MES_0
pknox2	srgn	0.0298204	0.0298204	1.60813e-15	14.7937	MES_0
dlx6a	aqp3a	-0.0298188	0.0298188	1.79227e-08	7.7466	MES_0
creb5b	crim1	0.0298025	0.0298025	9.3998e-15	14.0269	MES_0
foxo1b	cx30.3	0.0297889	0.0297889	2.41921e-15	14.6163	MES_0
pknox2	paqr5b	0.0297848	0.0297848	3.40963e-09	8.46729	MES_0
jdp2b	znf185	-0.0297761	0.0297761	1.07105e-06	5.97019	MES_0
mitfa	fstl1b	-0.0297711	0.0297711	2.25334e-11	10.6472	MES_0
sox6	cobll1b	0.0297501	0.0297501	6.4135e-12	11.1929	MES_0
nfixb	mhc1zba	0.0297459	0.0297459	8.48931e-07	6.07113	MES_0
cebpd	fosb	0.0297437	0.0297437	6.12405e-15	14.213	MES_0
foxp4	tspan35	0.0297402	0.0297402	3.82977e-13	12.4168	MES_0
meox2a	mmp2	0.0297387	0.0297387	3.10183e-08	7.50838	MES_0
meis3	cdh1	0.0297228	0.0297228	3.56437e-10	9.44802	MES_0
dlx6a	sparc	-0.0297128	0.0297128	4.10523e-08	7.38666	MES_0
alx4a	lmna	-0.029704	0.029704	1.07649e-14	13.968	MES_0
lef1	ptprfa	0.0296767	0.0296767	5.07875e-16	15.2942	MES_0
nr4a3	osbpl3a	0.0296605	0.0296605	2.31221e-16	15.636	MES_0
stat3	fstb	0.0296589	0.0296589	1.12815e-13	12.9476	MES_0
nfixa	cobll1b	0.0296513	0.0296513	5.4118e-10	9.26666	MES_0
her6	asap3	-0.0296488	0.0296488	7.24299e-13	12.1401	MES_0
cux1a	cdh1	0.0296481	0.0296481	0.000914595	3.03877	MES_0
nfatc1	ek1	0.0296478	0.0296478	7.1684e-12	11.1446	MES_0
lmx1ba	col10a1a	-0.0296357	0.0296357	1.51324e-07	6.82009	MES_0
heyl	ptgdsb.1	-0.029635	0.029635	2.14042e-08	7.6695	MES_0
bach2b	dennd4a	-0.0296307	0.0296307	3.9491e-13	12.4035	MES_0
cebpd	evpla	-0.0296275	0.0296275	4.25441e-11	10.3712	MES_0
twist1a	chst11	-0.0296244	0.0296244	9.70825e-10	9.01286	MES_0
rxraa	thy1	0.0296199	0.0296199	2.21676e-07	6.65428	MES_0
elf3	krt18a.1	-0.0296004	0.0296004	3.38311e-10	9.47068	MES_0
sox6	clic2	0.0295971	0.0295971	1.31e-07	6.88273	MES_0
jun	prickle2b	-0.0295825	0.0295825	7.27227e-12	11.1383	MES_0
nr4a3	smoc1	-0.0295785	0.0295785	4.35366e-08	7.36115	MES_0
gfi1b	baiap2a	0.0295745	0.0295745	1.35277e-08	7.86878	MES_0
thrab	eppk1	0.029573	0.029573	3.11686e-07	6.50628	MES_0
klf12a	nfatc1	0.0295701	0.0295701	4.67525e-08	7.3302	MES_0
elf3	nectin1b	0.0295626	0.0295626	9.82531e-09	8.00765	MES_0
pknox2	fstb	0.0295383	0.0295383	4.44569e-13	12.3521	MES_0
foxo1b	rxfp2a	0.0295368	0.0295368	1.51762e-13	12.8188	MES_0
hlfa	krt15	0.0295305	0.0295305	6.99912e-11	10.155	MES_0
klf6a	pah	-0.0295211	0.0295211	2.06293e-14	13.6855	MES_0
pknox2	plch2a	-0.029509	0.029509	2.47149e-06	5.60704	MES_0
jun	trps1	0.0295023	0.0295023	2.20086e-11	10.6574	MES_0
atf3	klf12a	0.0294952	0.0294952	2.11246e-13	12.6752	MES_0
nkx3-1	pfn1	-0.0294869	0.0294869	6.71239e-10	9.17312	MES_0
rfx2	tnika	0.0294866	0.0294866	5.48117e-10	9.26113	MES_0
hnf4g	lepb	0.0294781	0.0294781	4.43887e-08	7.35273	MES_0
nkx3-1	pdlim2	0.0294768	0.0294768	3.70838e-08	7.43082	MES_0
nr4a3	zgc:152791	0.0294696	0.0294696	1.02361e-10	9.98986	MES_0
dlx6a	col1a1b	-0.0294639	0.0294639	5.30485e-08	7.27533	MES_0
ches1	fbxl7	0.0294488	0.0294488	7.46908e-13	12.1267	MES_0
nfic	tshz1	0.0294406	0.0294406	3.18845e-13	12.4964	MES_0
fosl1a	tmem176l.4	0.0294306	0.0294306	0.000152906	3.81558	MES_0
nr4a1	col17a1a	0.0294301	0.0294301	1.24603e-08	7.90447	MES_0
hmga2	elovl1a	-0.0294283	0.0294283	1.71515e-08	7.7657	MES_0
fosab	midn	0.0294221	0.0294221	1.89248e-13	12.723	MES_0
sox6	cxcl12a	-0.0294185	0.0294185	1.95694e-08	7.70842	MES_0
pknox2	sort1a	0.0294179	0.0294179	2.1502e-13	12.6675	MES_0
elf3	cadm4	0.029407	0.029407	1.02244e-12	11.9904	MES_0
egr2b	cxcl18b	0.0294016	0.0294016	2.78879e-10	9.55458	MES_0
bhlhe40	pah	0.029399	0.029399	2.96449e-12	11.528	MES_0
klf12a	dusp5	0.0293985	0.0293985	3.04036e-12	11.5171	MES_0
rfx2	phlda2	0.0293955	0.0293955	1.25243e-08	7.90225	MES_0
nr4a3	rhpn2	0.0293909	0.0293909	4.9102e-10	9.3089	MES_0
trps1	tnfrsf9a	0.029387	0.029387	3.42701e-10	9.46508	MES_0
ebf1b	krt97	0.0293855	0.0293855	5.43501e-06	5.2648	MES_0
foxo1a	myo5b	0.0293781	0.0293781	8.0688e-10	9.09319	MES_0
fosab	clybl	-0.0293712	0.0293712	1.23097e-14	13.9098	MES_0
runx2a	add3a	-0.0293556	0.0293556	3.25357e-11	10.4876	MES_0
elf3	cldnb	0.0293403	0.0293403	2.76342e-12	11.5586	MES_0
egr1	loxa	0.029334	0.029334	1.24717e-13	12.9041	MES_0
lmx1ba	myo5b	0.0293256	0.0293256	3.19774e-13	12.4952	MES_0
nr4a1	apoeb	0.0293204	0.0293204	4.45041e-09	8.3516	MES_0
rarab	aspn	-0.0293037	0.0293037	9.7835e-12	11.0095	MES_0
nr1d2a	fn1b	-0.0292969	0.0292969	3.40394e-06	5.46802	MES_0
hnf4g	apoeb	0.0292929	0.0292929	9.75873e-06	5.01061	MES_0
cebpd	gadd45ba	0.0292837	0.0292837	8.37532e-14	13.077	MES_0
foxo1a	cav1	-0.0292774	0.0292774	8.42713e-13	12.0743	MES_0
sox9a	raly	-0.0292682	0.0292682	1.42489e-08	7.84622	MES_0
bhlhe40	rplp0	-0.0292583	0.0292583	7.21611e-15	14.1417	MES_0
nr4a3	kremen1	-0.0292481	0.0292481	9.38025e-11	10.0278	MES_0
mafk	chst11	-0.0292461	0.0292461	1.38166e-06	5.8596	MES_0
lmx1ba	thbs4b	0.0292367	0.0292367	1.05796e-09	8.97553	MES_0
foxp4	ier2b	0.0292335	0.0292335	4.34568e-08	7.36194	MES_0
nfatc1	ntn1a	0.0292314	0.0292314	1.95489e-10	9.70888	MES_0
zeb1b	prdm1a	0.0292187	0.0292187	3.02611e-11	10.5191	MES_0
gli2a	akap12b	0.0292166	0.0292166	3.06169e-12	11.514	MES_0
spi1b	aqp3a	-0.0292149	0.0292149	5.4464e-08	7.26389	MES_0
lmx1ba	postnb	-0.0291865	0.0291865	5.14481e-09	8.28863	MES_0
meis3	tfpia	0.0291795	0.0291795	1.73687e-09	8.76023	MES_0
nr4a3	ptgdsb.1	0.0291735	0.0291735	1.76137e-06	5.75415	MES_0
mafk	fam13b	0.0291545	0.0291545	2.24345e-13	12.6491	MES_0
sox6	epha7	0.0291471	0.0291471	5.43319e-14	13.2649	MES_0
raraa	angptl2b	-0.029139	0.029139	8.51596e-13	12.0698	MES_0
bhlhe40	pnp5a	0.0291254	0.0291254	4.57492e-13	12.3396	MES_0
ar	serpinh1b	-0.0291225	0.0291225	1.43897e-09	8.84195	MES_0
elf3	tenm3	-0.0291221	0.0291221	1.21546e-07	6.91526	MES_0
mitfb	adam8a	0.0291177	0.0291177	4.67595e-08	7.33013	MES_0
nr1d2a	robo1	-0.0291143	0.0291143	1.36643e-06	5.86441	MES_0
dlx4a	ptgs2a	0.0291093	0.0291093	5.46545e-07	6.26237	MES_0
klf6a	hsp90aa1.2	0.0291046	0.0291046	4.1617e-11	10.3807	MES_0
fosb	lima1a	-0.029101	0.029101	1.35611e-09	8.86771	MES_0
klf12b	perp	-0.0290938	0.0290938	1.50578e-05	4.82224	MES_0
twist2	chst11	0.0290684	0.0290684	1.33229e-06	5.8754	MES_0
fosl1a	angptl1a	0.0290575	0.0290575	6.5105e-10	9.18639	MES_0
grhl2a	si:dkey-221j11.3	0.0290571	0.0290571	9.33119e-10	9.03006	MES_0
cebpd	myo5b	-0.0290517	0.0290517	6.11775e-09	8.21341	MES_0
im:7142702	ptprfb	0.029042	0.029042	2.68515e-09	8.57103	MES_0
rfx2	midn	0.0290404	0.0290404	4.9079e-12	11.3091	MES_0
nkx3-1	baiap2a	0.0290267	0.0290267	1.17863e-05	4.92862	MES_0
tfeb	macrod2	0.0290236	0.0290236	1.85283e-08	7.73216	MES_0
lmx1ba	malb	0.0290091	0.0290091	1.656e-15	14.7809	MES_0
ebf1b	nedd9	-0.029	0.029	5.17423e-11	10.2862	MES_0
lmx1ba	ppl	0.0289958	0.0289958	4.83954e-08	7.3152	MES_0
klf8	krt4	0.0289949	0.0289949	5.63858e-12	11.2488	MES_0
klf6a	f13a1b	-0.0289946	0.0289946	8.38314e-11	10.0766	MES_0
foxp4	midn	0.0289728	0.0289728	4.70685e-09	8.32727	MES_0
klf12a	fosab	-0.0289718	0.0289718	1.74992e-12	11.757	MES_0
rorc	cdh1	0.0289715	0.0289715	6.14732e-09	8.21131	MES_0
dlx6a	cxcl8b.1	-0.0289432	0.0289432	2.0285e-11	10.6928	MES_0
atf3	scinla	0.0289274	0.0289274	6.02388e-12	11.2201	MES_0
nr4a1	si:ch211-156j16.1	-0.0289229	0.0289229	9.23564e-12	11.0345	MES_0
jun	dnajb1b	0.0289224	0.0289224	2.53043e-12	11.5968	MES_0
nfic	pknox2	0.0289114	0.0289114	8.39954e-11	10.0757	MES_0
egr1	zgc:193505	0.0288926	0.0288926	1.22026e-08	7.91355	MES_0
her6	twist2	0.0288865	0.0288865	8.44986e-09	8.07315	MES_0
nfixb	actn4	0.0288822	0.0288822	1.07907e-12	11.967	MES_0
foxp1b	b2ml	0.0288782	0.0288782	1.7794e-15	14.7497	MES_0
jun	sdc4	-0.0288505	0.0288505	8.41392e-15	14.075	MES_0
dlx4a	foxp4	0.028838	0.028838	5.9114e-11	10.2283	MES_0
meis3	col4a5	0.0288334	0.0288334	5.64532e-12	11.2483	MES_0
ches1	col1a2	0.0288174	0.0288174	3.49922e-12	11.456	MES_0
sox9a	si:ch211-157c3.4	-0.0288071	0.0288071	2.24243e-09	8.64928	MES_0
mafk	loxl1	-0.0288035	0.0288035	2.67094e-11	10.5733	MES_0
runx1	cldna	-0.0287914	0.0287914	5.66939e-08	7.24646	MES_0
klf12a	robo3	-0.0287846	0.0287846	7.07548e-12	11.1502	MES_0
elf3	spink2.1	0.0287796	0.0287796	2.60144e-14	13.5848	MES_0
klf2a	col11a1b	-0.0287739	0.0287739	1.68491e-08	7.77342	MES_0
bach2b	epcam	0.0287621	0.0287621	2.23809e-11	10.6501	MES_0
twist2	itgbl1	0.0287611	0.0287611	1.33824e-14	13.8735	MES_0
raraa	klf12a	0.0287587	0.0287587	7.90428e-08	7.10214	MES_0
raraa	alpi.1	-0.0287444	0.0287444	1.93455e-10	9.71342	MES_0
bach2b	igfbp1a	0.0287397	0.0287397	1.4548e-12	11.8372	MES_0
runx2a	fibinb	-0.0287327	0.0287327	4.93488e-07	6.30672	MES_0
elf3	chac2	0.028724	0.028724	8.37241e-17	16.0771	MES_0
foxo3b	spns2	0.0287073	0.0287073	1.43329e-08	7.84367	MES_0
klf15	mtss1la	0.0287067	0.0287067	4.81908e-16	15.317	MES_0
arid3c	c1qtnf5	0.0286917	0.0286917	5.81164e-10	9.2357	MES_0
runx1	csf1ra	0.0286879	0.0286879	2.12262e-13	12.6731	MES_0
dlx4a	raly	-0.0286814	0.0286814	4.10225e-10	9.38698	MES_0
foxp4	krt5	0.0286805	0.0286805	7.62462e-15	14.1178	MES_0
foxo1a	actn4	0.0286744	0.0286744	2.04762e-13	12.6888	MES_0
nfatc1	csf1a	0.0286645	0.0286645	1.79852e-15	14.7451	MES_0
dlx4a	itgb4	-0.0286562	0.0286562	0.00027941	3.55376	MES_0
jun	serpine1	-0.0286522	0.0286522	2.40424e-10	9.61902	MES_0
tp63	cxcl8b.1	0.0286409	0.0286409	2.05049e-11	10.6881	MES_0
ches1	rbms3	0.0286302	0.0286302	2.66321e-10	9.57459	MES_0
junba	fosb	0.0286294	0.0286294	5.16319e-13	12.2871	MES_0
nr1d2a	gli2a	-0.0286259	0.0286259	4.77452e-09	8.32107	MES_0
tbx2a	fn1a	-0.0286144	0.0286144	1.73449e-05	4.76083	MES_0
jdp2b	elovl1a	-0.0286129	0.0286129	5.72379e-12	11.2423	MES_0
runx1	slc38a3a	0.0286009	0.0286009	2.37018e-10	9.62522	MES_0
elf3	ezrb	0.028598	0.028598	2.35243e-10	9.62848	MES_0
lef1	slco3a1	0.0285692	0.0285692	9.29168e-14	13.0319	MES_0
hmga2	fn1a	0.0285639	0.0285639	2.297e-05	4.63884	MES_0
hmga2	fgfr1b	-0.0285444	0.0285444	6.59141e-08	7.18102	MES_0
jun	klf4	0.0285418	0.0285418	1.35264e-11	10.8688	MES_0
nr4a3	pah	-0.0285347	0.0285347	1.32225e-09	8.87869	MES_0
si:ch211-153j24.3	mdka	0.0285158	0.0285158	1.8799e-10	9.72587	MES_0
runx3	krtt1c19e	-0.0285106	0.0285106	3.18782e-11	10.4965	MES_0
sox6	spock3	-0.028489	0.028489	4.81702e-10	9.31722	MES_0
nfatc1	and1	-0.0284871	0.0284871	0.000113177	3.94624	MES_0
foxo1a	mhc1uba	0.0284842	0.0284842	1.72566e-09	8.76305	MES_0
alx4a	wif1	-0.0284805	0.0284805	5.41833e-09	8.26613	MES_0
nr4a1	krtt1c19e	0.0284682	0.0284682	4.8187e-11	10.3171	MES_0
foxp4	krt15	0.0284658	0.0284658	1.18818e-09	8.92512	MES_0
nr4a1	ptgdsb.2	0.0284639	0.0284639	3.31464e-11	10.4796	MES_0
mafk	f3a	-0.0284571	0.0284571	9.30121e-10	9.03146	MES_0
dlx6a	fn1a	0.0284555	0.0284555	0.000171517	3.76569	MES_0
dlx4a	cxcl14	0.0284548	0.0284548	2.71887e-09	8.56561	MES_0
klf12a	numbl	0.0284542	0.0284542	2.9405e-12	11.5316	MES_0
dlx4a	robo1	0.0284385	0.0284385	1.50938e-07	6.8212	MES_0
runx2a	fhl2a	-0.0284321	0.0284321	1.47283e-15	14.8318	MES_0
fosab	epha7	-0.0284285	0.0284285	1.40348e-10	9.85279	MES_0
jun	hsp70.2	0.0284205	0.0284205	7.93927e-13	12.1002	MES_0
nr1d4b	adam8a	0.0284162	0.0284162	1.1454e-07	6.94104	MES_0
dmrt1	mmp30	-0.0284152	0.0284152	1.74237e-14	13.7589	MES_0
foxp1b	sema4ba	0.0284035	0.0284035	2.87896e-08	7.54076	MES_0
klf8	dkk2	-0.0283975	0.0283975	7.89239e-11	10.1028	MES_0
nkx3-1	frem2b	-0.0283828	0.0283828	4.71966e-11	10.3261	MES_0
nfixb	ebf3a	0.0283819	0.0283819	1.39158e-11	10.8565	MES_0
zeb1b	lrmda	0.0283754	0.0283754	1.99001e-10	9.70114	MES_0
sox9a	chrdl2	0.0283665	0.0283665	3.68916e-14	13.4331	MES_0
meis3	hbegfa	0.0283631	0.0283631	4.05282e-08	7.39224	MES_0
mafk	krt18a.1	-0.0283579	0.0283579	2.37915e-11	10.6236	MES_0
nfixb	cldnb	0.028302	0.028302	9.72369e-13	12.0122	MES_0
creb5b	fgfrl1a	0.0282954	0.0282954	2.02438e-07	6.69371	MES_0
klf12a	zgc:153665	-0.0282774	0.0282774	5.00452e-06	5.30064	MES_0
wt1b	lum	-0.0282702	0.0282702	5.5395e-13	12.2565	MES_0
fosab	pappaa	-0.0282617	0.0282617	6.24019e-17	16.2048	MES_0
nr4a3	cyp26b1	0.0282578	0.0282578	3.17038e-08	7.49889	MES_0
klf2a	si:busm1-57f23.1	0.0282517	0.0282517	1.2781e-08	7.89344	MES_0
nfixb	cxcl12a	-0.0282513	0.0282513	3.51654e-07	6.45388	MES_0
rfx3	krt94	0.0282455	0.0282455	2.60587e-07	6.58405	MES_0
foxo1b	tnfaip6	-0.0282323	0.0282323	2.2746e-09	8.6431	MES_0
sox6	and1	-0.0282256	0.0282256	8.41795e-05	4.07479	MES_0
egr1	notum1b	0.0282189	0.0282189	1.48811e-10	9.82737	MES_0
foxo3b	pkp3a	0.0282074	0.0282074	8.86372e-11	10.0524	MES_0
tcf7l1b	furina	-0.0282011	0.0282011	1.3891e-09	8.85727	MES_0
thrab	klf8	0.0281963	0.0281963	7.27649e-07	6.13808	MES_0
nfic	tfpia	-0.0281847	0.0281847	1.52836e-09	8.81578	MES_0
foxp1b	spns2	0.0281678	0.0281678	1.05856e-09	8.97529	MES_0
si:ch211-153j24.3	mmp2	0.0281615	0.0281615	1.84979e-11	10.7329	MES_0
fosl1a	aspn	-0.0281536	0.0281536	0.000188637	3.72437	MES_0
stat3	acsl4b	0.0281469	0.0281469	5.55809e-14	13.2551	MES_0
tfeb	nrg1	0.0281463	0.0281463	5.04249e-10	9.29736	MES_0
jdp2b	angptl2b	-0.0281385	0.0281385	4.74407e-10	9.32385	MES_0
foxo3b	apoeb	-0.0281367	0.0281367	2.50739e-07	6.60078	MES_0
klf2a	itgb4	-0.0281366	0.0281366	7.1687e-06	5.14456	MES_0
runx1	wnt5b	0.0281244	0.0281244	3.64166e-11	10.4387	MES_0
mafk	dennd4a	0.02812	0.02812	4.62029e-11	10.3353	MES_0
thrab	fstl3	0.0281157	0.0281157	3.40281e-10	9.46816	MES_0
nr4a3	serpine1	-0.0281094	0.0281094	1.2877e-07	6.89019	MES_0
bach2b	ugt5f1	-0.0281051	0.0281051	1.58402e-11	10.8002	MES_0
lmx1ba	f3a	0.028098	0.028098	8.05082e-08	7.09416	MES_0
pknox2	jupa	-0.0280962	0.0280962	4.89856e-10	9.30993	MES_0
elf3	gig2l	0.028095	0.028095	1.71942e-12	11.7646	MES_0
lmx1ba	zgc:153665	0.0280874	0.0280874	2.86913e-11	10.5422	MES_0
sox6	alpi.1	0.0280861	0.0280861	1.58333e-08	7.80043	MES_0
cux1a	elovl1a	-0.0280821	0.0280821	1.02479e-06	5.98936	MES_0
klf8	stat1b	0.0280816	0.0280816	1.202e-17	16.9201	MES_0
meis3	enam	0.0280816	0.0280816	1.17461e-09	8.93011	MES_0
pknox2	gli2a	-0.0280673	0.0280673	2.51401e-11	10.5996	MES_0
fosab	fn1b	-0.0280619	0.0280619	6.52124e-06	5.18567	MES_0
fosb	crip1	0.0280615	0.0280615	2.98517e-09	8.52503	MES_0
osr1	zbtb16a	0.028058	0.028058	1.12414e-09	8.94918	MES_0
tcf7l2	enpp1	0.0280445	0.0280445	1.44992e-07	6.83866	MES_0
foxp1b	scel	0.0280387	0.0280387	3.41948e-08	7.46604	MES_0
grhl2a	agr1	0.0280381	0.0280381	3.71763e-09	8.42973	MES_0
twist2	numbl	0.028037	0.028037	3.36897e-10	9.4725	MES_0
elf3	tnk1	0.0280248	0.0280248	2.28984e-12	11.6402	MES_0
mafk	col18a1a	0.0280202	0.0280202	6.39055e-05	4.19446	MES_0
alx4a	prickle2b	0.0280167	0.0280167	6.31999e-16	15.1993	MES_0
nfatc1	pleca	0.0280166	0.0280166	5.34895e-11	10.2717	MES_0
alx4a	rgs5a	0.0280067	0.0280067	9.90261e-09	8.00425	MES_0
bhlhe40	tox2	0.0280051	0.0280051	2.99516e-17	16.5236	MES_0
dlx6a	enam	-0.0279994	0.0279994	2.5721e-10	9.58971	MES_0
foxo1a	svila	0.0279972	0.0279972	1.40685e-10	9.85175	MES_0
rfx2	jupa	0.0279751	0.0279751	3.44448e-09	8.46288	MES_0
klf7a	si:busm1-57f23.1	-0.0279707	0.0279707	1.04757e-06	5.97982	MES_0
sox6	lmo7a	-0.0279691	0.0279691	4.24598e-05	4.37202	MES_0
fosl1a	macrod2	0.0279614	0.0279614	6.61235e-11	10.1796	MES_0
alx4a	prdm1a	0.0279537	0.0279537	4.13883e-08	7.38312	MES_0
sox6	foxp4	0.0279521	0.0279521	2.51542e-12	11.5994	MES_0
irf8	baiap2a	0.0279492	0.0279492	6.4675e-11	10.1893	MES_0
runx1	crim1	0.027942	0.027942	1.90302e-11	10.7206	MES_0
mafk	btg2	0.0279369	0.0279369	4.92695e-17	16.3074	MES_0
dmrt1	tmprss13b	0.0279159	0.0279159	4.87916e-14	13.3117	MES_0
twist2	plxna3	-0.0279038	0.0279038	4.16962e-16	15.3799	MES_0
dmrt1	si:ch211-79k12.1	0.0278972	0.0278972	3.49714e-07	6.45629	MES_0
hmga2	igfbp1a	0.0278918	0.0278918	1.46827e-12	11.8332	MES_0
egr1	twist2	0.0278819	0.0278819	7.13096e-06	5.14685	MES_0
foxo1b	loxl2a	-0.027879	0.027879	4.16578e-10	9.3803	MES_0
foxo1a	col27a1b	-0.0278736	0.0278736	2.13805e-10	9.66998	MES_0
esr2a	and2	-0.0278675	0.0278675	4.17058e-12	11.3798	MES_0
meis3	and2	0.0278569	0.0278569	3.29783e-10	9.48177	MES_0
klf8	foxo3b	0.0278536	0.0278536	9.92925e-12	11.0031	MES_0
klf6a	fosab	0.0278473	0.0278473	1.99862e-10	9.69927	MES_0
dlx4a	ptprub	0.0278354	0.0278354	3.99448e-07	6.39854	MES_0
ebf1b	tnfaip6	0.0278328	0.0278328	3.77456e-06	5.42313	MES_0
cebpd	igf2b	-0.0278307	0.0278307	8.74814e-08	7.05808	MES_0
foxo1b	ano1	0.027829	0.027829	5.77934e-10	9.23812	MES_0
mef2cb	krt93	0.0278247	0.0278247	2.86855e-12	11.5423	MES_0
stat5a	krt4	-0.0278233	0.0278233	1.75863e-09	8.75483	MES_0
twist2	fstl1a	0.0278232	0.0278232	1.19293e-08	7.92338	MES_0
hnf4g	twist2	-0.027822	0.027822	7.14865e-06	5.14578	MES_0
raraa	eppk1	-0.027809	0.027809	2.54786e-06	5.59382	MES_0
sox6	pdgfab	0.0278062	0.0278062	3.41184e-13	12.467	MES_0
tp63	zgc:153911	0.0278046	0.0278046	2.21488e-15	14.6546	MES_0
cebpd	cldna	-0.0278039	0.0278039	3.20576e-08	7.49407	MES_0
klf2a	cldni	-0.0278035	0.0278035	1.44472e-06	5.84022	MES_0
elf3	fgfr1b	0.027797	0.027797	5.97703e-11	10.2235	MES_0
pknox2	tent5bb	0.027786	0.027786	9.89441e-17	16.0046	MES_0
fosab	and1	0.0277858	0.0277858	7.0498e-08	7.15182	MES_0
elf3	ampd3b	0.0277774	0.0277774	8.83124e-10	9.05398	MES_0
bhlhe40	macrod2	0.0277723	0.0277723	6.5769e-10	9.18198	MES_0
rarab	fstl3	-0.0277722	0.0277722	1.60026e-09	8.79581	MES_0
cux1a	macc1	-0.027772	0.027772	2.08675e-08	7.68053	MES_0
sox9a	cobll1b	-0.0277668	0.0277668	1.20175e-08	7.92018	MES_0
twist2	zgc:153665	-0.0277595	0.0277595	7.72629e-08	7.11203	MES_0
nfatc1	nav3	0.0277561	0.0277561	4.71847e-12	11.3262	MES_0
foxp4	slco3a1	0.0277546	0.0277546	1.5118e-07	6.82051	MES_0
fosb	aqp3a	0.0277534	0.0277534	2.82557e-05	4.54889	MES_0
fosab	col5a2a	-0.02775	0.02775	9.60276e-15	14.0176	MES_0
nfixa	cyp26b1	-0.0277445	0.0277445	2.25172e-07	6.64748	MES_0
lef1	daam1b	0.0277405	0.0277405	2.78447e-05	4.55526	MES_0
ebf3a	dennd4a	-0.0277078	0.0277078	1.41189e-10	9.8502	MES_0
foxp4	prss35	0.0277037	0.0277037	1.93747e-08	7.71276	MES_0
foxo3b	hsd17b12a	0.0276748	0.0276748	1.86089e-10	9.73028	MES_0
egr1	dsc2l	-0.0276696	0.0276696	5.59983e-07	6.25182	MES_0
nfixa	mmp2	-0.027668	0.027668	3.13651e-06	5.50355	MES_0
grhl2a	mgst1.2	0.0276679	0.0276679	3.43815e-11	10.4637	MES_0
nfixb	krt18a.1	-0.0276648	0.0276648	4.75375e-08	7.32296	MES_0
foxp4	nkain4	0.0276441	0.0276441	9.09741e-13	12.0411	MES_0
tcf7l2	itgb4	-0.0276361	0.0276361	2.31918e-06	5.63467	MES_0
bach2b	serpinb1l4	0.0276249	0.0276249	8.59865e-10	9.06557	MES_0
klf15	plch2a	-0.0276204	0.0276204	3.78881e-07	6.4215	MES_0
runx2a	krt94	0.0276187	0.0276187	4.37881e-07	6.35864	MES_0
klf12a	gfpt2	0.0276175	0.0276175	3.99422e-14	13.3986	MES_0
foxp1b	cd74a	0.0275886	0.0275886	1.48953e-12	11.827	MES_0
mafk	selenop	0.0275876	0.0275876	5.19444e-12	11.2845	MES_0
foxp4	rbms3	-0.0275862	0.0275862	4.073e-09	8.39009	MES_0
jun	epha7	-0.0275837	0.0275837	2.41134e-11	10.6177	MES_0
alx4a	robo1	-0.0275813	0.0275813	3.0927e-10	9.50966	MES_0
atf3	epha7	0.0275792	0.0275792	7.45927e-12	11.1273	MES_0
hlfa	hopx	0.0275737	0.0275737	1.00349e-08	7.99849	MES_0
foxo1b	mhc2dab	0.0275727	0.0275727	6.11612e-07	6.21352	MES_0
dmrt1	ftr83	0.0275675	0.0275675	2.88174e-09	8.54035	MES_0
foxo1b	jupa	0.0275606	0.0275606	5.0023e-11	10.3008	MES_0
nfic	apoeb	-0.0275599	0.0275599	1.20633e-06	5.91853	MES_0
ebf1b	col11a1a	-0.0275295	0.0275295	5.80137e-09	8.23647	MES_0
zeb1b	lnx1	0.0275138	0.0275138	4.43322e-05	4.35328	MES_0
dlx4a	krt15	-0.0275003	0.0275003	3.5086e-07	6.45487	MES_0
egr1	chsy1	-0.0274764	0.0274764	4.48196e-11	10.3485	MES_0
tfeb	dsc2l	0.027476	0.027476	1.02058e-08	7.99115	MES_0
rarab	si:ch211-156j16.1	0.0274688	0.0274688	7.80646e-12	11.1075	MES_0
nfixb	camk2d1	0.0274688	0.0274688	1.81133e-17	16.742	MES_0
foxp4	btbd11a	0.0274568	0.0274568	6.68574e-15	14.1749	MES_0
si:ch211-153j24.3	fstl1b	0.0274489	0.0274489	1.97365e-10	9.70473	MES_0
sox6	slit3	-0.027447	0.027447	1.05025e-07	6.97871	MES_0
grhl2a	itga9	-0.0274463	0.0274463	2.48121e-13	12.6053	MES_0
foxp4	ptgdsb.2	-0.0274459	0.0274459	2.00788e-09	8.69726	MES_0
foxo3b	jupa	0.0274453	0.0274453	1.34796e-09	8.87032	MES_0
sox9a	tenm3	-0.0274394	0.0274394	2.63779e-10	9.57876	MES_0
runx3	b2ml	0.0274384	0.0274384	5.77327e-08	7.23858	MES_0
mef2cb	tnfrsf9a	0.0274236	0.0274236	7.99759e-11	10.097	MES_0
fosl1a	has1	-0.0274172	0.0274172	1.48334e-06	5.82876	MES_0
tp63	mmp30	0.0274088	0.0274088	1.26607e-11	10.8975	MES_0
klf2a	ppl	0.0274086	0.0274086	0.000188734	3.72415	MES_0
raraa	stat3	0.0274073	0.0274073	2.34345e-14	13.6301	MES_0
rfx3	itga5	0.0273976	0.0273976	2.19784e-11	10.658	MES_0
cebpd	trps1	-0.0273963	0.0273963	1.35714e-09	8.86738	MES_0
cebpd	krt93	-0.0273901	0.0273901	3.84736e-08	7.41484	MES_0
nr4a1	nectin1b	-0.0273868	0.0273868	1.90639e-09	8.71979	MES_0
dlx4a	fn1a	-0.0273864	0.0273864	1.24675e-05	4.90422	MES_0
pknox2	chst11	0.0273782	0.0273782	2.31556e-12	11.6353	MES_0
im:7142702	crhbp	0.0273718	0.0273718	7.65497e-08	7.11606	MES_0
nr4a1	arhgef1b	-0.0273654	0.0273654	3.74346e-08	7.42673	MES_0
fosl1a	evpla	0.0273598	0.0273598	1.43227e-11	10.844	MES_0
trps1	krt93	0.027358	0.027358	1.95631e-06	5.70856	MES_0
fosb	znf185	-0.0273449	0.0273449	4.49643e-09	8.34713	MES_0
dmrt1	mid1ip1a	0.0273446	0.0273446	4.66744e-09	8.33092	MES_0
lhx9	scel	0.0273436	0.0273436	2.50705e-07	6.60084	MES_0
nr4a3	zgc:153911	0.0273419	0.0273419	1.22168e-09	8.91304	MES_0
fosb	pmp22b	0.0273389	0.0273389	6.97931e-09	8.15619	MES_0
foxo1b	b2ml	0.0273257	0.0273257	5.4716e-07	6.26189	MES_0
creb5b	ptgdsb.2	-0.0273171	0.0273171	7.60545e-09	8.11888	MES_0
tcf7l2	rbp4	-0.0272993	0.0272993	7.48966e-11	10.1255	MES_0
hnf4g	celf2	-0.0272977	0.0272977	1.15424e-08	7.9377	MES_0
foxo1a	itga5	-0.0272627	0.0272627	8.8286e-08	7.05411	MES_0
egr1	ek1	0.0272385	0.0272385	5.51329e-07	6.25859	MES_0
thrab	fn1b	-0.0272377	0.0272377	0.000189871	3.72154	MES_0
pbx1a	zgc:153665	0.027233	0.027233	9.31829e-09	8.03066	MES_0
nkx3-1	ptprfa	-0.0272277	0.0272277	6.43133e-16	15.1917	MES_0
sox9a	cast	-0.0272273	0.0272273	1.93844e-10	9.71255	MES_0
jdp2b	si:busm1-57f23.1	-0.027226	0.027226	4.57814e-06	5.33931	MES_0
trps1	lmo7a	0.0272184	0.0272184	1.11736e-06	5.95181	MES_0
nfatc1	ptgs2a	-0.0272099	0.0272099	3.9931e-07	6.39869	MES_0
im:7142702	zbtb16a	0.0272055	0.0272055	1.58598e-08	7.7997	MES_0
rfx3	fn1a	0.0271967	0.0271967	2.48384e-11	10.6049	MES_0
klf12b	dkk2	0.0271943	0.0271943	3.89623e-10	9.40936	MES_0
lmx1ba	emilin1b	-0.027193	0.027193	1.78276e-12	11.7489	MES_0
mafk	aqp3a	0.0271892	0.0271892	1.32216e-06	5.87872	MES_0
twist1a	krt94	-0.0271889	0.0271889	2.95794e-05	4.52901	MES_0
meis3	slit2	0.0271877	0.0271877	1.34175e-09	8.87233	MES_0
stat3	mvp	0.0271868	0.0271868	3.71682e-16	15.4298	MES_0
nfatc1	stat3	0.0271659	0.0271659	4.21854e-08	7.37484	MES_0
dlx6a	zbtb16a	-0.0271606	0.0271606	5.82422e-09	8.23476	MES_0
foxo1b	osbpl3a	0.027154	0.027154	1.37551e-11	10.8615	MES_0
trps1	tph1b	0.0271539	0.0271539	1.11867e-06	5.9513	MES_0
bach2b	runx2a	0.02715	0.02715	1.30774e-08	7.88348	MES_0
fosb	grhl2a	-0.0271459	0.0271459	4.32425e-10	9.36409	MES_0
runx2a	itga11a	-0.0271427	0.0271427	6.97335e-07	6.15656	MES_0
meox2a	col1a2	0.0271331	0.0271331	1.14329e-09	8.94185	MES_0
grhl2a	si:dkey-193p11.2	0.0271295	0.0271295	4.77328e-11	10.3212	MES_0
thrab	perp	0.0271178	0.0271178	2.13236e-06	5.67114	MES_0
fosb	frem2a	-0.027117	0.027117	1.28404e-07	6.89142	MES_0
foxp1b	rflna	0.0271135	0.0271135	8.01691e-13	12.096	MES_0
bach2b	rbp4	-0.0270852	0.0270852	4.88619e-11	10.311	MES_0
[truncated: 24,003 more rows]

## Sheet: Table S6C
Table S6. Mesenchymal (MES) subclusters DEGs and CellOracle infered GRNs
C. TF gene regulatory network centrality scores in each MES subcluster calculated by CellOracle
TF gene	degree_all	degree_centrality_all	degree_in	degree_centrality_in	degree_out	degree_centrality_out	betweenness_centrality	eigenvector_centrality	cluster
ebf3a	10	0.0196464	1	0.00196464	9	0.0176817	164	0.0623882	MES_0
tgfbr3	2	0.00392927	2	0.00392927	0	0	0	0.014973	MES_0
cebpd	23	0.0451866	0	0	23	0.0451866	0	0.13394	MES_0
c4b	5	0.00982318	5	0.00982318	0	0	0	0.061243	MES_0
tp63	40	0.0785855	14	0.0275049	26	0.0510806	2897	0.488096	MES_0
cldna	14	0.0275049	14	0.0275049	0	0	0	0.2466	MES_0
foxp4	88	0.172888	4	0.00785855	84	0.165029	5367	1	MES_0
baiap2a	14	0.0275049	14	0.0275049	0	0	0	0.354217	MES_0
klf8	59	0.115914	4	0.00785855	55	0.108055	1633	0.466339	MES_0
scel	10	0.0196464	10	0.0196464	0	0	0	0.249925	MES_0
dlx4a	66	0.129666	0	0	66	0.129666	0	0.598108	MES_0
aopep	4	0.00785855	4	0.00785855	0	0	0	0.140522	MES_0
grhl2a	37	0.0726916	3	0.00589391	34	0.0667976	1385	0.229902	MES_0
tmem176l.4	8	0.0157171	8	0.0157171	0	0	0	0.16801	MES_0
rfx2	30	0.0589391	3	0.00589391	27	0.0530452	538	0.221308	MES_0
socs3a	10	0.0196464	10	0.0196464	0	0	0	0.208023	MES_0
zgc:153665	16	0.0314342	16	0.0314342	0	0	0	0.202985	MES_0
sox6	49	0.0962672	1	0.00196464	48	0.0943026	750	0.421733	MES_0
pdgfrb	5	0.00982318	5	0.00982318	0	0	0	0.100252	MES_0
runx3	20	0.0392927	0	0	20	0.0392927	0	0.133497	MES_0
jun	45	0.0884086	7	0.0137525	38	0.0746562	2088	0.326733	MES_0
alx4a	30	0.0589391	0	0	30	0.0589391	0	0.196538	MES_0
ecrg4a	15	0.0294695	15	0.0294695	0	0	0	0.223694	MES_0
foxo1a	46	0.0903733	0	0	46	0.0903733	0	0.224355	MES_0
tnfaip6	9	0.0176817	9	0.0176817	0	0	0	0.105231	MES_0
perp	10	0.0196464	10	0.0196464	0	0	0	0.152543	MES_0
plch2a	7	0.0137525	7	0.0137525	0	0	0	0.205079	MES_0
nfixb	24	0.0471513	0	0	24	0.0471513	0	0.12556	MES_0
postnb	10	0.0196464	10	0.0196464	0	0	0	0.11598	MES_0
ppl	5	0.00982318	5	0.00982318	0	0	0	0.112819	MES_0
twist1a	18	0.0353635	0	0	18	0.0353635	0	0.104643	MES_0
twist2	28	0.0550098	5	0.00982318	23	0.0451866	599	0.115506	MES_0
fibinb	6	0.0117878	6	0.0117878	0	0	0	0.0617656	MES_0
dmrt1	21	0.0412574	2	0.00392927	19	0.0373281	33	0.121224	MES_0
lmo7a	10	0.0196464	10	0.0196464	0	0	0	0.177378	MES_0
nectin1b	7	0.0137525	7	0.0137525	0	0	0	0.19377	MES_0
pknox2	58	0.113949	2	0.00392927	56	0.11002	570	0.437713	MES_0
fn1b	15	0.0294695	15	0.0294695	0	0	0	0.199625	MES_0
trps1	20	0.0392927	5	0.00982318	15	0.0294695	2199	0.211129	MES_0
cdh1	10	0.0196464	10	0.0196464	0	0	0	0.144258	MES_0
apoeb	20	0.0392927	20	0.0392927	0	0	0	0.298995	MES_0
tnika	8	0.0157171	8	0.0157171	0	0	0	0.163923	MES_0
dsc2l	10	0.0196464	10	0.0196464	0	0	0	0.257011	MES_0
cldni	17	0.0333988	17	0.0333988	0	0	0	0.210622	MES_0
elf3	61	0.119843	0	0	61	0.119843	0	0.305619	MES_0
znf185	5	0.00982318	5	0.00982318	0	0	0	0.104667	MES_0
dhrs13a.2	5	0.00982318	5	0.00982318	0	0	0	0.0853857	MES_0
cldne	6	0.0117878	6	0.0117878	0	0	0	0.0648385	MES_0
si:ch211-157c3.4	5	0.00982318	5	0.00982318	0	0	0	0.0921577	MES_0
myh9a	11	0.021611	11	0.021611	0	0	0	0.218294	MES_0
lima1a	8	0.0157171	8	0.0157171	0	0	0	0.191762	MES_0
tfpia	7	0.0137525	7	0.0137525	0	0	0	0.211168	MES_0
myo5b	9	0.0176817	9	0.0176817	0	0	0	0.143382	MES_0
ccl25b	9	0.0176817	9	0.0176817	0	0	0	0.129619	MES_0
fa2h	5	0.00982318	5	0.00982318	0	0	0	0.0658202	MES_0
thy1	10	0.0196464	10	0.0196464	0	0	0	0.241005	MES_0
cast	5	0.00982318	5	0.00982318	0	0	0	0.125333	MES_0
jag1a	2	0.00392927	2	0.00392927	0	0	0	0.132038	MES_0
fosl1a	43	0.0844794	7	0.0137525	36	0.0707269	1253	0.385305	MES_0
phlda2	12	0.0235756	12	0.0235756	0	0	0	0.183545	MES_0
runx2b	8	0.0157171	0	0	8	0.0157171	0	0.0683692	MES_0
her6	11	0.021611	0	0	11	0.021611	0	0.0646349	MES_0
cygb1	11	0.021611	11	0.021611	0	0	0	0.164073	MES_0
thrab	26	0.0510806	0	0	26	0.0510806	0	0.158289	MES_0
frem2b	6	0.0117878	6	0.0117878	0	0	0	0.156955	MES_0
lnx1	7	0.0137525	7	0.0137525	0	0	0	0.0293224	MES_0
runx2a	15	0.0294695	2	0.00392927	13	0.0255403	297	0.103724	MES_0
f3b	19	0.0373281	19	0.0373281	0	0	0	0.363646	MES_0
nfat5b	2	0.00392927	0	0	2	0.00392927	0	0.0204241	MES_0
itga6b	8	0.0157171	8	0.0157171	0	0	0	0.110075	MES_0
meox2a	19	0.0373281	0	0	19	0.0373281	0	0.135093	MES_0
col10a1a	13	0.0255403	13	0.0255403	0	0	0	0.284503	MES_0
tbx2a	9	0.0176817	0	0	9	0.0176817	0	0.114139	MES_0
pkp3a	10	0.0196464	10	0.0196464	0	0	0	0.218452	MES_0
hmga2	37	0.0726916	0	0	37	0.0726916	0	0.247318	MES_0
dlx6a	37	0.0726916	0	0	37	0.0726916	0	0.298632	MES_0
col18a1a	9	0.0176817	9	0.0176817	0	0	0	0.125289	MES_0
foxp1b	29	0.0569745	0	0	29	0.0569745	0	0.256182	MES_0
macc1	11	0.021611	11	0.021611	0	0	0	0.157417	MES_0
krt97	8	0.0157171	8	0.0157171	0	0	0	0.22151	MES_0
paqr5b	10	0.0196464	10	0.0196464	0	0	0	0.156916	MES_0
daam1b	9	0.0176817	9	0.0176817	0	0	0	0.0543809	MES_0
tnks1bp1	4	0.00785855	4	0.00785855	0	0	0	0.0698031	MES_0
stat3	23	0.0451866	6	0.0117878	17	0.0333988	1412	0.15806	MES_0
fosb	42	0.0825147	7	0.0137525	35	0.0687623	2296	0.388258	MES_0
raraa	31	0.0609037	0	0	31	0.0609037	0	0.205191	MES_0
adam8a	12	0.0235756	12	0.0235756	0	0	0	0.130928	MES_0
lef1	12	0.0235756	0	0	12	0.0235756	0	0.0725508	MES_0
itgb4	18	0.0353635	18	0.0353635	0	0	0	0.177635	MES_0
and1	18	0.0353635	18	0.0353635	0	0	0	0.191089	MES_0
runx1	27	0.0530452	0	0	27	0.0530452	0	0.118698	MES_0
ptprub	4	0.00785855	4	0.00785855	0	0	0	0.0636427	MES_0
nr4a1	34	0.0667976	0	0	34	0.0667976	0	0.198099	MES_0
eppk1	12	0.0235756	12	0.0235756	0	0	0	0.144318	MES_0
egr1	23	0.0451866	0	0	23	0.0451866	0	0.091398	MES_0
ccn2a	7	0.0137525	7	0.0137525	0	0	0	0.0346097	MES_0
barhl1a	6	0.0117878	0	0	6	0.0117878	0	0.0588437	MES_0
ches1	32	0.0628684	0	0	32	0.0628684	0	0.156802	MES_0
htra1a	6	0.0117878	6	0.0117878	0	0	0	0.0450254	MES_0
cux1a	20	0.0392927	0	0	20	0.0392927	0	0.108647	MES_0
im:7142702	8	0.0157171	0	0	8	0.0157171	0	0.039103	MES_0
bach2b	21	0.0412574	0	0	21	0.0412574	0	0.131449	MES_0
enam	10	0.0196464	10	0.0196464	0	0	0	0.0828227	MES_0
foxo1b	39	0.0766208	2	0.00392927	37	0.0726916	526	0.180828	MES_0
ccn1	17	0.0333988	17	0.0333988	0	0	0	0.210407	MES_0
junba	19	0.0373281	0	0	19	0.0373281	0	0.158705	MES_0
mef2cb	19	0.0373281	0	0	19	0.0373281	0	0.144651	MES_0
arid3a	8	0.0157171	0	0	8	0.0157171	0	0.0659571	MES_0
nrgna	1	0.00196464	1	0.00196464	0	0	0	0.0226228	MES_0
rgs5a	12	0.0235756	12	0.0235756	0	0	0	0.159122	MES_0
mafk	47	0.0923379	0	0	47	0.0923379	0	0.232248	MES_0
mdka	14	0.0275049	14	0.0275049	0	0	0	0.146011	MES_0
ptgs2a	4	0.00785855	4	0.00785855	0	0	0	0.0747405	MES_0
aebp1	5	0.00982318	5	0.00982318	0	0	0	0.0470082	MES_0
cxcl18b	7	0.0137525	7	0.0137525	0	0	0	0.0742586	MES_0
meis3	21	0.0412574	0	0	21	0.0412574	0	0.176938	MES_0
niban1a	2	0.00392927	2	0.00392927	0	0	0	0.0584938	MES_0
hlfa	12	0.0235756	0	0	12	0.0235756	0	0.0638925	MES_0
gli2b	7	0.0137525	0	0	7	0.0137525	0	0.0368908	MES_0
col11a1a	15	0.0294695	15	0.0294695	0	0	0	0.186556	MES_0
fosab	36	0.0707269	8	0.0157171	28	0.0550098	1127	0.279802	MES_0
c1qtnf5	14	0.0275049	14	0.0275049	0	0	0	0.0949034	MES_0
lum	10	0.0196464	10	0.0196464	0	0	0	0.113835	MES_0
nedd9	9	0.0176817	9	0.0176817	0	0	0	0.125718	MES_0
ogfrl2	2	0.00392927	2	0.00392927	0	0	0	0.0311402	MES_0
hip1rb	2	0.00392927	2	0.00392927	0	0	0	0.029246	MES_0
aqp3a	11	0.021611	11	0.021611	0	0	0	0.196778	MES_0
pawr	5	0.00982318	5	0.00982318	0	0	0	0.117696	MES_0
sox9a	15	0.0294695	0	0	15	0.0294695	0	0.114163	MES_0
krt91	4	0.00785855	4	0.00785855	0	0	0	0.0214902	MES_0
prdm1a	3	0.00589391	3	0.00589391	0	0	0	0.0205103	MES_0
pcolce2b	4	0.00785855	4	0.00785855	0	0	0	0.0518125	MES_0
rhpn2	3	0.00589391	3	0.00589391	0	0	0	0.0695845	MES_0
klf6a	23	0.0451866	4	0.00785855	19	0.0373281	194	0.155847	MES_0
vcana	14	0.0275049	14	0.0275049	0	0	0	0.118374	MES_0
sfrp1b	7	0.0137525	7	0.0137525	0	0	0	0.102128	MES_0
atf3	20	0.0392927	0	0	20	0.0392927	0	0.155746	MES_0
igf2b	7	0.0137525	7	0.0137525	0	0	0	0.0646774	MES_0
jupa	9	0.0176817	9	0.0176817	0	0	0	0.182287	MES_0
zgc:111983	5	0.00982318	5	0.00982318	0	0	0	0.0627422	MES_0
rbp4	16	0.0314342	16	0.0314342	0	0	0	0.143684	MES_0
zgc:193505	7	0.0137525	7	0.0137525	0	0	0	0.0889387	MES_0
stard14	2	0.00392927	2	0.00392927	0	0	0	0.0539243	MES_0
agr1	4	0.00785855	4	0.00785855	0	0	0	0.0318582	MES_0
clic2	3	0.00589391	3	0.00589391	0	0	0	0.0407476	MES_0
aspn	13	0.0255403	13	0.0255403	0	0	0	0.163547	MES_0
ar	11	0.021611	0	0	11	0.021611	0	0.0770148	MES_0
fn1a	15	0.0294695	15	0.0294695	0	0	0	0.102278	MES_0
pmp22b	4	0.00785855	4	0.00785855	0	0	0	0.0622313	MES_0
epcam	10	0.0196464	10	0.0196464	0	0	0	0.192716	MES_0
epha7	8	0.0157171	8	0.0157171	0	0	0	0.145731	MES_0
cldnb	5	0.00982318	5	0.00982318	0	0	0	0.0690301	MES_0
nfic	17	0.0333988	0	0	17	0.0333988	0	0.149827	MES_0
fgfr1b	9	0.0176817	9	0.0176817	0	0	0	0.0829851	MES_0
krt94	16	0.0314342	16	0.0314342	0	0	0	0.101961	MES_0
tcf7l1b	9	0.0176817	0	0	9	0.0176817	0	0.0505448	MES_0
ptprfb	4	0.00785855	4	0.00785855	0	0	0	0.0967253	MES_0
tmprss4a	4	0.00785855	4	0.00785855	0	0	0	0.0619397	MES_0
cldn7b	5	0.00982318	5	0.00982318	0	0	0	0.127288	MES_0
abi3bpb	17	0.0333988	17	0.0333988	0	0	0	0.280136	MES_0
malb	4	0.00785855	4	0.00785855	0	0	0	0.0471236	MES_0
klf7a	20	0.0392927	0	0	20	0.0392927	0	0.144969	MES_0
rbpjb	1	0.00196464	0	0	1	0.00196464	0	0.00228874	MES_0
notch3	3	0.00589391	3	0.00589391	0	0	0	0.109141	MES_0
nrg1	9	0.0176817	9	0.0176817	0	0	0	0.115019	MES_0
pdlim7	4	0.00785855	4	0.00785855	0	0	0	0.0437412	MES_0
nr4a3	39	0.0766208	0	0	39	0.0766208	0	0.146464	MES_0
ucmaa	4	0.00785855	4	0.00785855	0	0	0	0.0783757	MES_0
chst11	8	0.0157171	8	0.0157171	0	0	0	0.0522804	MES_0
nuggc.3	2	0.00392927	2	0.00392927	0	0	0	0.0883056	MES_0
si:busm1-57f23.1	13	0.0255403	13	0.0255403	0	0	0	0.163034	MES_0
creb5b	13	0.0255403	0	0	13	0.0255403	0	0.057759	MES_0
dkk3b	15	0.0294695	15	0.0294695	0	0	0	0.173855	MES_0
lmx1ba	35	0.0687623	0	0	35	0.0687623	0	0.213944	MES_0
fgfrl1a	2	0.00392927	2	0.00392927	0	0	0	0.0108987	MES_0
evpla	7	0.0137525	7	0.0137525	0	0	0	0.10123	MES_0
ntn1a	9	0.0176817	9	0.0176817	0	0	0	0.0722419	MES_0
itga5	8	0.0157171	8	0.0157171	0	0	0	0.046387	MES_0
mmp2	11	0.021611	11	0.021611	0	0	0	0.117903	MES_0
bcam	9	0.0176817	9	0.0176817	0	0	0	0.104748	MES_0
alpi.1	9	0.0176817	9	0.0176817	0	0	0	0.138576	MES_0
frem2a	5	0.00982318	5	0.00982318	0	0	0	0.117645	MES_0
bmpr1ba	9	0.0176817	9	0.0176817	0	0	0	0.131414	MES_0
bhlhe40	19	0.0373281	0	0	19	0.0373281	0	0.0713768	MES_0
gli2a	16	0.0314342	6	0.0117878	10	0.0196464	334	0.0815118	MES_0
col11a1b	6	0.0117878	6	0.0117878	0	0	0	0.088548	MES_0
mitfb	5	0.00982318	0	0	5	0.00982318	0	0.0451594	MES_0
kazald3	5	0.00982318	5	0.00982318	0	0	0	0.119598	MES_0
fstl1b	12	0.0235756	12	0.0235756	0	0	0	0.200169	MES_0
sema4ba	6	0.0117878	6	0.0117878	0	0	0	0.0969553	MES_0
celf2	4	0.00785855	4	0.00785855	0	0	0	0.0593589	MES_0
entpd1	13	0.0255403	13	0.0255403	0	0	0	0.14182	MES_0
plod2	3	0.00589391	3	0.00589391	0	0	0	0.0507099	MES_0
jdp2b	33	0.064833	7	0.0137525	26	0.0510806	2069	0.279961	MES_0
sparc	9	0.0176817	9	0.0176817	0	0	0	0.0867989	MES_0
plcd1a	3	0.00589391	3	0.00589391	0	0	0	0.0519745	MES_0
klf12a	32	0.0628684	5	0.00982318	27	0.0530452	2217	0.18121	MES_0
thbs4b	13	0.0255403	13	0.0255403	0	0	0	0.112803	MES_0
col1a2	4	0.00785855	4	0.00785855	0	0	0	0.0228755	MES_0
gmds	3	0.00589391	3	0.00589391	0	0	0	0.036964	MES_0
cxcl12a	12	0.0235756	12	0.0235756	0	0	0	0.158253	MES_0
rxraa	8	0.0157171	0	0	8	0.0157171	0	0.0753404	MES_0
rflna	2	0.00392927	2	0.00392927	0	0	0	0.0781507	MES_0
notch1a	3	0.00589391	3	0.00589391	0	0	0	0.0549891	MES_0
baiap2l1a	3	0.00589391	3	0.00589391	0	0	0	0.0189437	MES_0
tgm5l	3	0.00589391	3	0.00589391	0	0	0	0.0526354	MES_0
dachd	2	0.00392927	2	0.00392927	0	0	0	0.00899256	MES_0
nt5e	5	0.00982318	5	0.00982318	0	0	0	0.0681176	MES_0
si:ch211-243a20.3	2	0.00392927	2	0.00392927	0	0	0	0.0131836	MES_0
heyl	8	0.0157171	0	0	8	0.0157171	0	0.0563094	MES_0
creb3l3b	8	0.0157171	0	0	8	0.0157171	0	0.0510635	MES_0
olfml2ba	3	0.00589391	3	0.00589391	0	0	0	0.0324248	MES_0
cx43	3	0.00589391	3	0.00589391	0	0	0	0.0202922	MES_0
smoc1	6	0.0117878	6	0.0117878	0	0	0	0.0975413	MES_0
tcf7l2	14	0.0275049	0	0	14	0.0275049	0	0.08068	MES_0
mhc1zba	3	0.00589391	3	0.00589391	0	0	0	0.0527611	MES_0
f5	3	0.00589391	3	0.00589391	0	0	0	0.0844797	MES_0
nkx3-1	12	0.0235756	0	0	12	0.0235756	0	0.0404288	MES_0
hsd17b12a	5	0.00982318	5	0.00982318	0	0	0	0.0499989	MES_0
krt18a.1	7	0.0137525	7	0.0137525	0	0	0	0.0462505	MES_0
lamb1a	3	0.00589391	3	0.00589391	0	0	0	0.0347684	MES_0
and2	4	0.00785855	4	0.00785855	0	0	0	0.0199363	MES_0
rbms3	10	0.0196464	10	0.0196464	0	0	0	0.127657	MES_0
pbx1a	5	0.00982318	0	0	5	0.00982318	0	0.037092	MES_0
ptgdsb.1	12	0.0235756	12	0.0235756	0	0	0	0.103622	MES_0
hnf4g	12	0.0235756	0	0	12	0.0235756	0	0.0887647	MES_0
serpinb1l4	5	0.00982318	5	0.00982318	0	0	0	0.0716561	MES_0
ugt8	1	0.00196464	1	0.00196464	0	0	0	0.0300127	MES_0
ckba	2	0.00392927	2	0.00392927	0	0	0	0.0221054	MES_0
spns2	6	0.0117878	6	0.0117878	0	0	0	0.0622514	MES_0
slit3	9	0.0176817	9	0.0176817	0	0	0	0.120373	MES_0
ebf1b	6	0.0117878	0	0	6	0.0117878	0	0.0459469	MES_0
gfi1b	11	0.021611	0	0	11	0.021611	0	0.0623403	MES_0
tenm3	16	0.0314342	16	0.0314342	0	0	0	0.198599	MES_0
wt1b	3	0.00589391	0	0	3	0.00589391	0	0.00890091	MES_0
col5a3b	1	0.00196464	1	0.00196464	0	0	0	0.00055729	MES_0
mhc2dab	2	0.00392927	2	0.00392927	0	0	0	0.0250411	MES_0
ano1	3	0.00589391	3	0.00589391	0	0	0	0.0400142	MES_0
tph1b	4	0.00785855	4	0.00785855	0	0	0	0.0192312	MES_0
npr1a	7	0.0137525	7	0.0137525	0	0	0	0.0990612	MES_0
si:ch211-79k12.1	3	0.00589391	3	0.00589391	0	0	0	0.0156174	MES_0
ezra	1	0.00196464	1	0.00196464	0	0	0	0.028576	MES_0
macrod2	7	0.0137525	7	0.0137525	0	0	0	0.0572174	MES_0
wif1	2	0.00392927	2	0.00392927	0	0	0	0.0157937	MES_0
klf2a	16	0.0314342	0	0	16	0.0314342	0	0.117908	MES_0
bhmt	7	0.0137525	7	0.0137525	0	0	0	0.0493026	MES_0
pfn1	6	0.0117878	6	0.0117878	0	0	0	0.116216	MES_0
ephb2b	7	0.0137525	7	0.0137525	0	0	0	0.0839399	MES_0
hmcn1	5	0.00982318	5	0.00982318	0	0	0	0.0629004	MES_0
arhgef1b	3	0.00589391	3	0.00589391	0	0	0	0.0186167	MES_0
mybl1	1	0.00196464	0	0	1	0.00196464	0	0.000895636	MES_0
igfbp1a	3	0.00589391	3	0.00589391	0	0	0	0.0722128	MES_0
pcdh7b	1	0.00196464	1	0.00196464	0	0	0	0.00705001	MES_0
rarab	20	0.0392927	0	0	20	0.0392927	0	0.109176	MES_0
serpine1	11	0.021611	11	0.021611	0	0	0	0.160269	MES_0
foxo3b	14	0.0275049	2	0.00392927	12	0.0235756	76	0.0800259	MES_0
col5a2a	2	0.00392927	2	0.00392927	0	0	0	0.0160014	MES_0
krt93	7	0.0137525	7	0.0137525	0	0	0	0.119478	MES_0
sdc4	4	0.00785855	4	0.00785855	0	0	0	0.0509402	MES_0
cxadr	7	0.0137525	7	0.0137525	0	0	0	0.053542	MES_0
nr1d2a	19	0.0373281	0	0	19	0.0373281	0	0.081327	MES_0
rfx3	6	0.0117878	0	0	6	0.0117878	0	0.0309342	MES_0
robo1	11	0.021611	11	0.021611	0	0	0	0.122979	MES_0
numbl	5	0.00982318	5	0.00982318	0	0	0	0.0346258	MES_0
rcn3	5	0.00982318	5	0.00982318	0	0	0	0.0494465	MES_0
nfatc1	28	0.0550098	3	0.00589391	25	0.0491159	1442	0.123229	MES_0
lmna	3	0.00589391	3	0.00589391	0	0	0	0.0276812	MES_0
cyp26b1	5	0.00982318	5	0.00982318	0	0	0	0.0423921	MES_0
tnfrsf9a	5	0.00982318	5	0.00982318	0	0	0	0.0789103	MES_0
tnfrsf18	2	0.00392927	2	0.00392927	0	0	0	0.0444991	MES_0
ccnd2a	3	0.00589391	3	0.00589391	0	0	0	0.0293384	MES_0
nfixa	9	0.0176817	0	0	9	0.0176817	0	0.0477069	MES_0
trim16	1	0.00196464	1	0.00196464	0	0	0	0.026252	MES_0
crabp1b	2	0.00392927	2	0.00392927	0	0	0	0.026879	MES_0
lhx9	9	0.0176817	0	0	9	0.0176817	0	0.0510764	MES_0
f3a	10	0.0196464	10	0.0196464	0	0	0	0.0857581	MES_0
pard6b	3	0.00589391	3	0.00589391	0	0	0	0.0389677	MES_0
krt15	7	0.0137525	7	0.0137525	0	0	0	0.0873738	MES_0
col4a5	4	0.00785855	4	0.00785855	0	0	0	0.0666837	MES_0
f13a1b	4	0.00785855	4	0.00785855	0	0	0	0.044011	MES_0
arid5b	7	0.0137525	0	0	7	0.0137525	0	0.0248452	MES_0
itga9	3	0.00589391	3	0.00589391	0	0	0	0.0140984	MES_0
tjp3	3	0.00589391	3	0.00589391	0	0	0	0.0254851	MES_0
aste1a	6	0.0117878	6	0.0117878	0	0	0	0.0970141	MES_0
csf1a	4	0.00785855	4	0.00785855	0	0	0	0.0346185	MES_0
egr2b	3	0.00589391	0	0	3	0.00589391	0	0.0109839	MES_0
sulf1	1	0.00196464	1	0.00196464	0	0	0	0.00451167	MES_0
actn4	6	0.0117878	6	0.0117878	0	0	0	0.101237	MES_0
rorc	7	0.0137525	0	0	7	0.0137525	0	0.0635972	MES_0
loxa	4	0.00785855	4	0.00785855	0	0	0	0.0387388	MES_0
ezrb	5	0.00982318	5	0.00982318	0	0	0	0.0476557	MES_0
nr3c2	8	0.0157171	0	0	8	0.0157171	0	0.0499903	MES_0
thbs3a	2	0.00392927	2	0.00392927	0	0	0	0.0269545	MES_0
lama5	6	0.0117878	6	0.0117878	0	0	0	0.0485016	MES_0
ogna	3	0.00589391	3	0.00589391	0	0	0	0.0207421	MES_0
igfbp5b	4	0.00785855	4	0.00785855	0	0	0	0.0649945	MES_0
spock3	2	0.00392927	2	0.00392927	0	0	0	0.0228103	MES_0
b2ml	5	0.00982318	5	0.00982318	0	0	0	0.0470722	MES_0
loxl2a	5	0.00982318	5	0.00982318	0	0	0	0.0789585	MES_0
tuft1a	3	0.00589391	3	0.00589391	0	0	0	0.0360179	MES_0
cd74b	4	0.00785855	4	0.00785855	0	0	0	0.0382509	MES_0
igsf3	2	0.00392927	2	0.00392927	0	0	0	0.0145546	MES_0
hbegfa	4	0.00785855	4	0.00785855	0	0	0	0.0249337	MES_0
eno1a	1	0.00196464	1	0.00196464	0	0	0	0.00834615	MES_0
elovl1a	10	0.0196464	10	0.0196464	0	0	0	0.0992856	MES_0
ptgis	3	0.00589391	3	0.00589391	0	0	0	0.061901	MES_0
robo3	2	0.00392927	2	0.00392927	0	0	0	0.0119554	MES_0
enpp1	4	0.00785855	4	0.00785855	0	0	0	0.066059	MES_0
pdlim2	4	0.00785855	4	0.00785855	0	0	0	0.0504345	MES_0
nav3	2	0.00392927	2	0.00392927	0	0	0	0.0124027	MES_0
zbtb16a	7	0.0137525	7	0.0137525	0	0	0	0.0646825	MES_0
tinagl1	1	0.00196464	1	0.00196464	0	0	0	0.0522906	MES_0
serpinh1b	6	0.0117878	6	0.0117878	0	0	0	0.0602202	MES_0
lpar1	1	0.00196464	1	0.00196464	0	0	0	0.00299549	MES_0
mhc1uba	3	0.00589391	3	0.00589391	0	0	0	0.0733793	MES_0
sema6e	5	0.00982318	5	0.00982318	0	0	0	0.055188	MES_0
pah	8	0.0157171	8	0.0157171	0	0	0	0.0629745	MES_0
si:dkey-193p11.2	2	0.00392927	2	0.00392927	0	0	0	0.0189021	MES_0
cst14b.1	2	0.00392927	2	0.00392927	0	0	0	0.0610788	MES_0
cav1	5	0.00982318	5	0.00982318	0	0	0	0.0347721	MES_0
cd74a	3	0.00589391	3	0.00589391	0	0	0	0.0259905	MES_0
prickle2b	3	0.00589391	3	0.00589391	0	0	0	0.024068	MES_0
degs2	2	0.00392927	2	0.00392927	0	0	0	0.0287509	MES_0
klf12b	7	0.0137525	0	0	7	0.0137525	0	0.0428312	MES_0
tfeb	8	0.0157171	0	0	8	0.0157171	0	0.0589388	MES_0
osr1	2	0.00392927	0	0	2	0.00392927	0	0.00364212	MES_0
kremen1	4	0.00785855	4	0.00785855	0	0	0	0.0293666	MES_0
has1	2	0.00392927	2	0.00392927	0	0	0	0.0178413	MES_0
slc38a3a	3	0.00589391	3	0.00589391	0	0	0	0.0150858	MES_0
furina	5	0.00982318	5	0.00982318	0	0	0	0.027429	MES_0
sik1	1	0.00196464	1	0.00196464	0	0	0	0.0233805	MES_0
smap2	1	0.00196464	1	0.00196464	0	0	0	0.00546814	MES_0
sp7	2	0.00392927	0	0	2	0.00392927	0	0.00760378	MES_0
mmp9	1	0.00196464	1	0.00196464	0	0	0	0.0210453	MES_0
si:dkey-221j11.3	3	0.00589391	3	0.00589391	0	0	0	0.0213879	MES_0
anxa11a	2	0.00392927	2	0.00392927	0	0	0	0.00916562	MES_0
il1b	1	0.00196464	1	0.00196464	0	0	0	0.0114305	MES_0
zfp36l1b	2	0.00392927	2	0.00392927	0	0	0	0.0223014	MES_0
klhl4	4	0.00785855	4	0.00785855	0	0	0	0.0349946	MES_0
asap3	6	0.0117878	6	0.0117878	0	0	0	0.0743009	MES_0
bnc2	1	0.00196464	1	0.00196464	0	0	0	0.00581791	MES_0
prss35	2	0.00392927	2	0.00392927	0	0	0	0.038195	MES_0
btg2	4	0.00785855	4	0.00785855	0	0	0	0.0502116	MES_0
fstl3	7	0.0137525	7	0.0137525	0	0	0	0.0543436	MES_0
sfrp2	5	0.00982318	5	0.00982318	0	0	0	0.0458688	MES_0
ptprfa	3	0.00589391	3	0.00589391	0	0	0	0.0518797	MES_0
zeb1b	9	0.0176817	0	0	9	0.0176817	0	0.0138391	MES_0
timp2b	2	0.00392927	2	0.00392927	0	0	0	0.0126123	MES_0
angptl1a	5	0.00982318	5	0.00982318	0	0	0	0.0348077	MES_0
raly	4	0.00785855	4	0.00785855	0	0	0	0.0351538	MES_0
itga11a	4	0.00785855	4	0.00785855	0	0	0	0.0182366	MES_0
slc51a	2	0.00392927	2	0.00392927	0	0	0	0.00740766	MES_0
cobll1b	6	0.0117878	6	0.0117878	0	0	0	0.03262	MES_0
pleca	2	0.00392927	2	0.00392927	0	0	0	0.00792122	MES_0
notum1b	2	0.00392927	2	0.00392927	0	0	0	0.0115342	MES_0
fstb	5	0.00982318	5	0.00982318	0	0	0	0.0343318	MES_0
ugt5f1	3	0.00589391	3	0.00589391	0	0	0	0.0255518	MES_0
crip1	4	0.00785855	4	0.00785855	0	0	0	0.0412456	MES_0
angptl2b	6	0.0117878	6	0.0117878	0	0	0	0.0376123	MES_0
emilin1b	2	0.00392927	2	0.00392927	0	0	0	0.014249	MES_0
hey2	3	0.00589391	0	0	3	0.00589391	0	0.00733577	MES_0
nfia	6	0.0117878	0	0	6	0.0117878	0	0.0288849	MES_0
rnf213a	3	0.00589391	3	0.00589391	0	0	0	0.0271585	MES_0
krt5	2	0.00392927	2	0.00392927	0	0	0	0.05658	MES_0
unc5b	1	0.00196464	1	0.00196464	0	0	0	0.04597	MES_0
tmprss13b	2	0.00392927	2	0.00392927	0	0	0	0.00587842	MES_0
nr1d4b	3	0.00589391	0	0	3	0.00589391	0	0.0169697	MES_0
mitfa	3	0.00589391	0	0	3	0.00589391	0	0.0193248	MES_0
klf4	3	0.00589391	3	0.00589391	0	0	0	0.0222299	MES_0
si:ch211-156j16.1	5	0.00982318	5	0.00982318	0	0	0	0.0356944	MES_0
dkk2	4	0.00785855	4	0.00785855	0	0	0	0.0271484	MES_0
pnp5a	3	0.00589391	3	0.00589391	0	0	0	0.0644933	MES_0
ppap2d	2	0.00392927	2	0.00392927	0	0	0	0.0247016	MES_0
ier2b	4	0.00785855	4	0.00785855	0	0	0	0.0630311	MES_0
dennd4a	7	0.0137525	7	0.0137525	0	0	0	0.0734633	MES_0
add3a	5	0.00982318	5	0.00982318	0	0	0	0.0666414	MES_0
ftr83	2	0.00392927	2	0.00392927	0	0	0	0.0176407	MES_0
ccdc80	4	0.00785855	4	0.00785855	0	0	0	0.018836	MES_0
nbn	1	0.00196464	1	0.00196464	0	0	0	0.0446442	MES_0
selenop	3	0.00589391	3	0.00589391	0	0	0	0.0223624	MES_0
plce1	1	0.00196464	1	0.00196464	0	0	0	0.00560381	MES_0
nrxn2a	1	0.00196464	1	0.00196464	0	0	0	0.0188068	MES_0
zcchc24	1	0.00196464	1	0.00196464	0	0	0	0.000615811	MES_0
scube3	1	0.00196464	1	0.00196464	0	0	0	0.0109665	MES_0
bcar1	2	0.00392927	2	0.00392927	0	0	0	0.0106743	MES_0
rhcgl1	1	0.00196464	1	0.00196464	0	0	0	0.0134495	MES_0
lhfpl6	1	0.00196464	1	0.00196464	0	0	0	0.00688689	MES_0
stat5a	2	0.00392927	0	0	2	0.00392927	0	0.0092812	MES_0
chmp6b	2	0.00392927	2	0.00392927	0	0	0	0.0247822	MES_0
elovl6l	1	0.00196464	1	0.00196464	0	0	0	0.013323	MES_0
csf1ra	2	0.00392927	2	0.00392927	0	0	0	0.0129465	MES_0
klf15	6	0.0117878	0	0	6	0.0117878	0	0.0360936	MES_0
nupr1b	1	0.00196464	1	0.00196464	0	0	0	0.000597645	MES_0
nid1b	4	0.00785855	4	0.00785855	0	0	0	0.0825085	MES_0
srgn	3	0.00589391	3	0.00589391	0	0	0	0.0228264	MES_0
gadd45ba	2	0.00392927	2	0.00392927	0	0	0	0.00814836	MES_0
mid1ip1a	3	0.00589391	3	0.00589391	0	0	0	0.0239636	MES_0
spi1b	4	0.00785855	0	0	4	0.00785855	0	0.018638	MES_0
rpl28	1	0.00196464	1	0.00196464	0	0	0	0.00956476	MES_0
rps27l	2	0.00392927	2	0.00392927	0	0	0	0.0241757	MES_0
zgc:153911	4	0.00785855	4	0.00785855	0	0	0	0.0524116	MES_0
spon2a	3	0.00589391	3	0.00589391	0	0	0	0.0109971	MES_0
slit2	3	0.00589391	3	0.00589391	0	0	0	0.0198358	MES_0
pbx3b	3	0.00589391	0	0	3	0.00589391	0	0.00897441	MES_0
asip2b	2	0.00392927	2	0.00392927	0	0	0	0.00375987	MES_0
chsy1	2	0.00392927	2	0.00392927	0	0	0	0.0127693	MES_0
tcnbb	1	0.00196464	1	0.00196464	0	0	0	0.0128613	MES_0
nppc	1	0.00196464	1	0.00196464	0	0	0	0.0250131	MES_0
midn	4	0.00785855	4	0.00785855	0	0	0	0.0678671	MES_0
mtss1la	2	0.00392927	2	0.00392927	0	0	0	0.00275318	MES_0
tmsb4x	1	0.00196464	1	0.00196464	0	0	0	0.0125674	MES_0
zgc:152791	4	0.00785855	4	0.00785855	0	0	0	0.0353573	MES_0
htra1b	2	0.00392927	2	0.00392927	0	0	0	0.024275	MES_0
lrmda	4	0.00785855	4	0.00785855	0	0	0	0.0371039	MES_0
slc40a1	1	0.00196464	1	0.00196464	0	0	0	0.00915843	MES_0
lepb	2	0.00392927	2	0.00392927	0	0	0	0.0438514	MES_0
col1a1b	4	0.00785855	4	0.00785855	0	0	0	0.042133	MES_0
bicdl2l	2	0.00392927	2	0.00392927	0	0	0	0.018618	MES_0
frem3	1	0.00196464	1	0.00196464	0	0	0	0.0406863	MES_0
osbpl3a	4	0.00785855	4	0.00785855	0	0	0	0.0636172	MES_0
mmp30	3	0.00589391	3	0.00589391	0	0	0	0.0299686	MES_0
ampd3b	2	0.00392927	2	0.00392927	0	0	0	0.011712	MES_0
pgr	1	0.00196464	0	0	1	0.00196464	0	0.00657672	MES_0
zgc:152670	1	0.00196464	1	0.00196464	0	0	0	0.00255526	MES_0
fstl1a	4	0.00785855	4	0.00785855	0	0	0	0.0346899	MES_0
gig2l	2	0.00392927	2	0.00392927	0	0	0	0.0164195	MES_0
dusp1	1	0.00196464	1	0.00196464	0	0	0	0.0130247	MES_0
rps24	1	0.00196464	1	0.00196464	0	0	0	0.00888775	MES_0
scinla	3	0.00589391	3	0.00589391	0	0	0	0.017561	MES_0
glis1a	1	0.00196464	0	0	1	0.00196464	0	0	MES_0
cd248a	1	0.00196464	1	0.00196464	0	0	0	0	MES_0
krt4	4	0.00785855	4	0.00785855	0	0	0	0.0267828	MES_0
wnt5b	3	0.00589391	3	0.00589391	0	0	0	0.0200966	MES_0
ripor2	1	0.00196464	1	0.00196464	0	0	0	0.0192046	MES_0
hsp70l	1	0.00196464	1	0.00196464	0	0	0	0.0031977	MES_0
acsl4b	2	0.00392927	2	0.00392927	0	0	0	0.00939565	MES_0
col27a1b	3	0.00589391	3	0.00589391	0	0	0	0.0194992	MES_0
ptgdsb.2	4	0.00785855	4	0.00785855	0	0	0	0.0563444	MES_0
hopx	2	0.00392927	2	0.00392927	0	0	0	0.00779536	MES_0
zgc:136930	1	0.00196464	1	0.00196464	0	0	0	0.00766115	MES_0
sort1a	2	0.00392927	2	0.00392927	0	0	0	0.016689	MES_0
bcl2a	1	0.00196464	1	0.00196464	0	0	0	0.00694722	MES_0
svila	3	0.00589391	3	0.00589391	0	0	0	0.0167584	MES_0
egr4	4	0.00785855	0	0	4	0.00785855	0	0.0050171	MES_0
rps23	1	0.00196464	1	0.00196464	0	0	0	0.00880873	MES_0
cntfr	1	0.00196464	1	0.00196464	0	0	0	0.0106109	MES_0
soul2	2	0.00392927	2	0.00392927	0	0	0	0.0166827	MES_0
tspan18b	1	0.00196464	1	0.00196464	0	0	0	0.0374783	MES_0
inhbaa	3	0.00589391	3	0.00589391	0	0	0	0.0128587	MES_0
sema3e	1	0.00196464	1	0.00196464	0	0	0	0.00439214	MES_0
adamts15a	1	0.00196464	1	0.00196464	0	0	0	0.000511242	MES_0
arid3c	2	0.00392927	0	0	2	0.00392927	0	0.0105554	MES_0
hmgn2	1	0.00196464	1	0.00196464	0	0	0	0.00666566	MES_0
dusp5	3	0.00589391	3	0.00589391	0	0	0	0.0286743	MES_0
col17a1a	2	0.00392927	2	0.00392927	0	0	0	0.0123126	MES_0
zgc:100997	1	0.00196464	1	0.00196464	0	0	0	0.0154795	MES_0
fhl2a	2	0.00392927	2	0.00392927	0	0	0	0.00785163	MES_0
crhbp	2	0.00392927	2	0.00392927	0	0	0	0.00333203	MES_0
tnk1	2	0.00392927	2	0.00392927	0	0	0	0.0185849	MES_0
gfpt2	2	0.00392927	2	0.00392927	0	0	0	0.0113021	MES_0
pcdh19	1	0.00196464	1	0.00196464	0	0	0	0.00458069	MES_0
krt17	1	0.00196464	1	0.00196464	0	0	0	0.00835049	MES_0
rcan2	1	0.00196464	1	0.00196464	0	0	0	0.00569362	MES_0
pfkfb3	1	0.00196464	1	0.00196464	0	0	0	0.00572728	MES_0
nfkbiaa	1	0.00196464	1	0.00196464	0	0	0	0.00530411	MES_0
spon1b	1	0.00196464	1	0.00196464	0	0	0	0.00573079	MES_0
zgc:154058	1	0.00196464	1	0.00196464	0	0	0	0.00655955	MES_0
ppp1r1b	1	0.00196464	1	0.00196464	0	0	0	0.0041795	MES_0
s1pr2	1	0.00196464	1	0.00196464	0	0	0	0.00376132	MES_0
zgc:91944	1	0.00196464	0	0	1	0.00196464	0	0.0071121	MES_0
loxl1	2	0.00392927	2	0.00392927	0	0	0	0.0088362	MES_0
disp1	1	0.00196464	1	0.00196464	0	0	0	0.00206477	MES_0
pdzrn3b	1	0.00196464	1	0.00196464	0	0	0	0.00727845	MES_0
crim1	2	0.00392927	2	0.00392927	0	0	0	0.00598545	MES_0
cx30.3	1	0.00196464	1	0.00196464	0	0	0	0.00639968	MES_0
tspan35	1	0.00196464	1	0.00196464	0	0	0	0.0353331	MES_0
ek1	2	0.00392927	2	0.00392927	0	0	0	0.00729827	MES_0
rxfp2a	1	0.00196464	1	0.00196464	0	0	0	0.00634552	MES_0
fbxl7	1	0.00196464	1	0.00196464	0	0	0	0.00548603	MES_0
tshz1	1	0.00196464	1	0.00196464	0	0	0	0.00524051	MES_0
cadm4	1	0.00196464	1	0.00196464	0	0	0	0.0106775	MES_0
clybl	1	0.00196464	1	0.00196464	0	0	0	0.0097636	MES_0
rplp0	1	0.00196464	1	0.00196464	0	0	0	0.0024811	MES_0
akap12b	1	0.00196464	1	0.00196464	0	0	0	0.00282936	MES_0
fam13b	1	0.00196464	1	0.00196464	0	0	0	0.00804442	MES_0
hsp90aa1.2	1	0.00196464	1	0.00196464	0	0	0	0.00538888	MES_0
cxcl8b.1	2	0.00392927	2	0.00392927	0	0	0	0.0268773	MES_0
dnajb1b	1	0.00196464	1	0.00196464	0	0	0	0.011227	MES_0
spink2.1	1	0.00196464	1	0.00196464	0	0	0	0.0104497	MES_0
itgbl1	1	0.00196464	1	0.00196464	0	0	0	0.00394684	MES_0
chac2	1	0.00196464	1	0.00196464	0	0	0	0.0104295	MES_0
slco3a1	2	0.00392927	2	0.00392927	0	0	0	0.0354366	MES_0
si:ch211-153j24.3	3	0.00589391	0	0	3	0.00589391	0	0.015419	MES_0
krtt1c19e	2	0.00392927	2	0.00392927	0	0	0	0.0112219	MES_0
cxcl14	1	0.00196464	1	0.00196464	0	0	0	0.0202196	MES_0
hsp70.2	1	0.00196464	1	0.00196464	0	0	0	0.0110322	MES_0
chrdl2	1	0.00196464	1	0.00196464	0	0	0	0.00384741	MES_0
pappaa	1	0.00196464	1	0.00196464	0	0	0	0.00939476	MES_0
stat1b	1	0.00196464	1	0.00196464	0	0	0	0.0155582	MES_0
tox2	1	0.00196464	1	0.00196464	0	0	0	0.00237483	MES_0
irf8	1	0.00196464	0	0	1	0.00196464	0	0.0117619	MES_0
plxna3	1	0.00196464	1	0.00196464	0	0	0	0.0038292	MES_0
esr2a	1	0.00196464	0	0	1	0.00196464	0	0.000660055	MES_0
pdgfab	1	0.00196464	1	0.00196464	0	0	0	0.0139321	MES_0
tent5bb	1	0.00196464	1	0.00196464	0	0	0	0.0144496	MES_0
mgst1.2	1	0.00196464	1	0.00196464	0	0	0	0.00755712	MES_0
nkain4	1	0.00196464	1	0.00196464	0	0	0	0.0328428	MES_0
camk2d1	1	0.00196464	1	0.00196464	0	0	0	0.00409757	MES_0
btbd11a	1	0.00196464	1	0.00196464	0	0	0	0.0326202	MES_0
mvp	1	0.00196464	1	0.00196464	0	0	0	0.00510526	MES_0
runx1	19	0.0375494	0	0	19	0.0375494	0	0.224625	MES_1
daam1b	8	0.0158103	8	0.0158103	0	0	0	0.102738	MES_1
grhl2a	43	0.0849802	4	0.00790514	39	0.0770751	1233	0.289551	MES_1
tmem176l.4	8	0.0158103	8	0.0158103	0	0	0	0.178217	MES_1
tp63	37	0.0731225	20	0.0395257	17	0.0335968	3498	0.510802	MES_1
cldna	12	0.0237154	12	0.0237154	0	0	0	0.232233	MES_1
foxo1a	51	0.100791	0	0	51	0.100791	0	0.38714	MES_1
tnfaip6	12	0.0237154	12	0.0237154	0	0	0	0.212694	MES_1
klf8	56	0.110672	3	0.00592885	53	0.104743	2916	0.453823	MES_1
perp	12	0.0237154	12	0.0237154	0	0	0	0.229027	MES_1
nfixb	19	0.0375494	0	0	19	0.0375494	0	0.19251	MES_1
foxp4	99	0.195652	8	0.0158103	91	0.179842	10106	1	MES_1
plch2a	8	0.0158103	8	0.0158103	0	0	0	0.2209	MES_1
krt97	7	0.013834	7	0.013834	0	0	0	0.215475	MES_1
cebpd	18	0.0355731	0	0	18	0.0355731	0	0.0854463	MES_1
c4b	3	0.00592885	3	0.00592885	0	0	0	0.0206293	MES_1
runx2a	30	0.0592885	14	0.027668	16	0.0316206	2051	0.249209	MES_1
jun	41	0.0810277	7	0.013834	34	0.0671937	952	0.491483	MES_1
krt91	10	0.0197628	10	0.0197628	0	0	0	0.106906	MES_1
apoeb	15	0.0296443	15	0.0296443	0	0	0	0.335719	MES_1
mafk	43	0.0849802	0	0	43	0.0849802	0	0.275712	MES_1
scel	11	0.0217391	11	0.0217391	0	0	0	0.230437	MES_1
baiap2a	17	0.0335968	17	0.0335968	0	0	0	0.326237	MES_1
tcf7l2	18	0.0355731	0	0	18	0.0355731	0	0.130091	MES_1
frem2b	8	0.0158103	8	0.0158103	0	0	0	0.192902	MES_1
dmrt1	22	0.0434783	2	0.00395257	20	0.0395257	32	0.147729	MES_1
cdh1	17	0.0335968	17	0.0335968	0	0	0	0.310025	MES_1
fosl1a	66	0.130435	5	0.00988142	61	0.120553	1287	0.577221	MES_1
phlda2	8	0.0158103	8	0.0158103	0	0	0	0.198624	MES_1
nectin1b	5	0.00988142	5	0.00988142	0	0	0	0.168022	MES_1
stat3	16	0.0316206	2	0.00395257	14	0.027668	40	0.174866	MES_1
ebf3a	11	0.0217391	1	0.00197628	10	0.0197628	331	0.150381	MES_1
dkk3b	9	0.0177866	9	0.0177866	0	0	0	0.128901	MES_1
cux1a	19	0.0375494	0	0	19	0.0375494	0	0.155469	MES_1
frem2a	9	0.0177866	9	0.0177866	0	0	0	0.215645	MES_1
tbx2a	7	0.013834	0	0	7	0.013834	0	0.126807	MES_1
mef2cb	42	0.083004	9	0.0177866	33	0.0652174	4648	0.411216	MES_1
zgc:153665	16	0.0316206	16	0.0316206	0	0	0	0.255134	MES_1
aqp3a	11	0.0217391	11	0.0217391	0	0	0	0.28301	MES_1
nfatc1	60	0.118577	9	0.0177866	51	0.100791	4805	0.506669	MES_1
dsc2l	11	0.0217391	11	0.0217391	0	0	0	0.274095	MES_1
krt94	17	0.0335968	17	0.0335968	0	0	0	0.197022	MES_1
tfpia	8	0.0158103	8	0.0158103	0	0	0	0.226543	MES_1
pknox2	66	0.130435	3	0.00592885	63	0.124506	3855	0.547656	MES_1
fn1b	14	0.027668	14	0.027668	0	0	0	0.203764	MES_1
ogna	5	0.00988142	5	0.00988142	0	0	0	0.0424989	MES_1
postnb	14	0.027668	14	0.027668	0	0	0	0.194874	MES_1
nr4a3	43	0.0849802	0	0	43	0.0849802	0	0.251941	MES_1
and2	6	0.0118577	6	0.0118577	0	0	0	0.104807	MES_1
twist2	27	0.0533597	3	0.00592885	24	0.0474308	1165	0.219801	MES_1
fosb	41	0.0810277	6	0.0118577	35	0.06917	5058	0.359856	MES_1
clic2	8	0.0158103	8	0.0158103	0	0	0	0.135684	MES_1
pkp3a	12	0.0237154	12	0.0237154	0	0	0	0.291814	MES_1
jag1a	6	0.0118577	6	0.0118577	0	0	0	0.163876	MES_1
eppk1	12	0.0237154	12	0.0237154	0	0	0	0.125459	MES_1
myh9a	8	0.0158103	8	0.0158103	0	0	0	0.171483	MES_1
junba	29	0.0573123	0	0	29	0.0573123	0	0.213169	MES_1
pmp22b	9	0.0177866	9	0.0177866	0	0	0	0.142662	MES_1
and1	17	0.0335968	17	0.0335968	0	0	0	0.228375	MES_1
hmga2	38	0.0750988	3	0.00592885	35	0.06917	1403	0.230837	MES_1
col10a1a	10	0.0197628	10	0.0197628	0	0	0	0.0977847	MES_1
thy1	7	0.013834	7	0.013834	0	0	0	0.18311	MES_1
sox9a	22	0.0434783	0	0	22	0.0434783	0	0.197879	MES_1
cntfr	6	0.0118577	6	0.0118577	0	0	0	0.11626	MES_1
alpi.1	9	0.0177866	9	0.0177866	0	0	0	0.174463	MES_1
lima1a	3	0.00592885	3	0.00592885	0	0	0	0.114043	MES_1
ppl	3	0.00592885	3	0.00592885	0	0	0	0.0718833	MES_1
myo5b	10	0.0197628	10	0.0197628	0	0	0	0.131773	MES_1
elf3	52	0.102767	0	0	52	0.102767	0	0.276433	MES_1
znf185	5	0.00988142	5	0.00988142	0	0	0	0.096052	MES_1
mdka	11	0.0217391	11	0.0217391	0	0	0	0.155324	MES_1
ccl25b	7	0.013834	7	0.013834	0	0	0	0.0914495	MES_1
rfx2	27	0.0533597	2	0.00395257	25	0.0494071	711	0.255213	MES_1
socs3a	10	0.0197628	10	0.0197628	0	0	0	0.14017	MES_1
im:7142702	4	0.00790514	0	0	4	0.00790514	0	0.0210589	MES_1
lnx1	7	0.013834	7	0.013834	0	0	0	0.0270983	MES_1
igf2b	10	0.0197628	10	0.0197628	0	0	0	0.131492	MES_1
lmo7a	8	0.0158103	8	0.0158103	0	0	0	0.136836	MES_1
itga6b	9	0.0177866	9	0.0177866	0	0	0	0.0704863	MES_1
sox6	61	0.120553	5	0.00988142	56	0.110672	6411	0.420624	MES_1
pcolce2b	11	0.0217391	11	0.0217391	0	0	0	0.167556	MES_1
klf6a	57	0.112648	9	0.0177866	48	0.0948617	2118	0.428939	MES_1
si:busm1-57f23.1	9	0.0177866	9	0.0177866	0	0	0	0.133602	MES_1
cldni	14	0.027668	14	0.027668	0	0	0	0.19873	MES_1
trps1	14	0.027668	7	0.013834	7	0.013834	1524	0.15217	MES_1
ptgs2a	2	0.00395257	2	0.00395257	0	0	0	0.0567917	MES_1
sfrp1b	6	0.0118577	6	0.0118577	0	0	0	0.129676	MES_1
klf12b	8	0.0158103	0	0	8	0.0158103	0	0.0205605	MES_1
tnn	8	0.0158103	8	0.0158103	0	0	0	0.114048	MES_1
pdgfrb	8	0.0158103	8	0.0158103	0	0	0	0.111099	MES_1
ptprub	8	0.0158103	8	0.0158103	0	0	0	0.13565	MES_1
plod2	10	0.0197628	10	0.0197628	0	0	0	0.152489	MES_1
macc1	9	0.0177866	9	0.0177866	0	0	0	0.150358	MES_1
nfixa	10	0.0197628	0	0	10	0.0197628	0	0.0974776	MES_1
ckba	4	0.00790514	4	0.00790514	0	0	0	0.0915846	MES_1
ches1	38	0.0750988	0	0	38	0.0750988	0	0.258642	MES_1
adam8a	11	0.0217391	11	0.0217391	0	0	0	0.121613	MES_1
aebp1	7	0.013834	7	0.013834	0	0	0	0.101309	MES_1
nr4a1	19	0.0375494	0	0	19	0.0375494	0	0.0934219	MES_1
fa2h	6	0.0118577	6	0.0118577	0	0	0	0.0887299	MES_1
tnika	13	0.0256917	13	0.0256917	0	0	0	0.170113	MES_1
twist1a	17	0.0335968	1	0.00197628	16	0.0316206	117	0.0876881	MES_1
lef1	10	0.0197628	0	0	10	0.0197628	0	0.056174	MES_1
itgb4	18	0.0355731	18	0.0355731	0	0	0	0.112536	MES_1
bhlhe40	23	0.0454545	0	0	23	0.0454545	0	0.146626	MES_1
klf12a	20	0.0395257	0	0	20	0.0395257	0	0.142459	MES_1
ccn1	15	0.0296443	15	0.0296443	0	0	0	0.202815	MES_1
si:ch211-157c3.4	3	0.00592885	3	0.00592885	0	0	0	0.0555665	MES_1
fibinb	8	0.0158103	8	0.0158103	0	0	0	0.0892392	MES_1
nrg1	6	0.0118577	6	0.0118577	0	0	0	0.113065	MES_1
wnt10a	2	0.00395257	2	0.00395257	0	0	0	0.0458268	MES_1
dlx6a	20	0.0395257	0	0	20	0.0395257	0	0.114957	MES_1
cast	6	0.0118577	6	0.0118577	0	0	0	0.130664	MES_1
itga5	15	0.0296443	15	0.0296443	0	0	0	0.139719	MES_1
sp7	9	0.0177866	1	0.00197628	8	0.0158103	148	0.0650318	MES_1
raraa	39	0.0770751	0	0	39	0.0770751	0	0.201403	MES_1
col18a1a	7	0.013834	7	0.013834	0	0	0	0.0756579	MES_1
nfia	10	0.0197628	0	0	10	0.0197628	0	0.0822504	MES_1
notch3	6	0.0118577	6	0.0118577	0	0	0	0.150263	MES_1
runx3	12	0.0237154	0	0	12	0.0237154	0	0.0709706	MES_1
sema3e	6	0.0118577	6	0.0118577	0	0	0	0.084051	MES_1
foxp1b	41	0.0810277	0	0	41	0.0810277	0	0.344741	MES_1
foxo3b	19	0.0375494	1	0.00197628	18	0.0355731	341	0.127367	MES_1
jdp2b	38	0.0750988	9	0.0177866	29	0.0573123	3907	0.353487	MES_1
has1	4	0.00790514	4	0.00790514	0	0	0	0.091225	MES_1
pbx1a	14	0.027668	0	0	14	0.027668	0	0.0728229	MES_1
vcana	14	0.027668	14	0.027668	0	0	0	0.13509	MES_1
cldne	2	0.00395257	2	0.00395257	0	0	0	0.0243204	MES_1
gli2b	2	0.00395257	0	0	2	0.00395257	0	0.00978759	MES_1
ar	25	0.0494071	0	0	25	0.0494071	0	0.122545	MES_1
alx4a	25	0.0494071	0	0	25	0.0494071	0	0.125331	MES_1
ecrg4a	11	0.0217391	11	0.0217391	0	0	0	0.0983539	MES_1
runx2b	12	0.0237154	2	0.00395257	10	0.0197628	648	0.112976	MES_1
creb3l3b	18	0.0355731	0	0	18	0.0355731	0	0.0758359	MES_1
cxcl12a	7	0.013834	7	0.013834	0	0	0	0.0714663	MES_1
rhpn2	4	0.00790514	4	0.00790514	0	0	0	0.0714041	MES_1
serpine1	13	0.0256917	13	0.0256917	0	0	0	0.179695	MES_1
epcam	14	0.027668	14	0.027668	0	0	0	0.290504	MES_1
foxo1b	38	0.0750988	1	0.00197628	37	0.0731225	1091	0.169442	MES_1
eno1a	4	0.00790514	4	0.00790514	0	0	0	0.0619317	MES_1
lhx9	25	0.0494071	0	0	25	0.0494071	0	0.166965	MES_1
slit3	6	0.0118577	6	0.0118577	0	0	0	0.0734124	MES_1
bach2b	17	0.0335968	0	0	17	0.0335968	0	0.109598	MES_1
pawr	6	0.0118577	6	0.0118577	0	0	0	0.130022	MES_1
cygb1	9	0.0177866	9	0.0177866	0	0	0	0.0918808	MES_1
mmp2	13	0.0256917	13	0.0256917	0	0	0	0.141972	MES_1
dhrs13a.2	3	0.00592885	3	0.00592885	0	0	0	0.0373551	MES_1
tenm3	9	0.0177866	9	0.0177866	0	0	0	0.129878	MES_1
paqr5b	5	0.00988142	5	0.00988142	0	0	0	0.0577135	MES_1
epha7	6	0.0118577	6	0.0118577	0	0	0	0.127864	MES_1
sema6e	6	0.0118577	6	0.0118577	0	0	0	0.0479386	MES_1
phex	8	0.0158103	8	0.0158103	0	0	0	0.114236	MES_1
mhc1uba	9	0.0177866	9	0.0177866	0	0	0	0.169508	MES_1
inhbaa	9	0.0177866	9	0.0177866	0	0	0	0.150976	MES_1
klf2a	21	0.041502	0	0	21	0.041502	0	0.155648	MES_1
malb	4	0.00790514	4	0.00790514	0	0	0	0.0564293	MES_1
rbp4	9	0.0177866	9	0.0177866	0	0	0	0.121367	MES_1
egr1	26	0.0513834	0	0	26	0.0513834	0	0.0779976	MES_1
tph1b	3	0.00592885	3	0.00592885	0	0	0	0.00668311	MES_1
prdm1a	2	0.00395257	2	0.00395257	0	0	0	0.0388652	MES_1
htra1a	8	0.0158103	8	0.0158103	0	0	0	0.076762	MES_1
serpinb1l4	8	0.0158103	8	0.0158103	0	0	0	0.112746	MES_1
nr1d4b	17	0.0335968	0	0	17	0.0335968	0	0.138208	MES_1
cldnb	11	0.0217391	11	0.0217391	0	0	0	0.148005	MES_1
zgc:193505	10	0.0197628	10	0.0197628	0	0	0	0.141256	MES_1
cx43	7	0.013834	7	0.013834	0	0	0	0.0615124	MES_1
tnks1bp1	3	0.00592885	3	0.00592885	0	0	0	0.059539	MES_1
zgc:111983	7	0.013834	7	0.013834	0	0	0	0.0806642	MES_1
krt15	8	0.0158103	8	0.0158103	0	0	0	0.0897135	MES_1
thrab	38	0.0750988	0	0	38	0.0750988	0	0.199399	MES_1
f3b	15	0.0296443	15	0.0296443	0	0	0	0.291734	MES_1
col11a1a	9	0.0177866	9	0.0177866	0	0	0	0.0911165	MES_1
jupa	6	0.0118577	6	0.0118577	0	0	0	0.138765	MES_1
gpc1b	5	0.00988142	5	0.00988142	0	0	0	0.0714278	MES_1
si:dkey-193p11.2	6	0.0118577	6	0.0118577	0	0	0	0.077462	MES_1
tcf7l1b	5	0.00988142	0	0	5	0.00988142	0	0.0282509	MES_1
krt18a.1	5	0.00988142	5	0.00988142	0	0	0	0.0600797	MES_1
plcd1a	3	0.00592885	3	0.00592885	0	0	0	0.0536545	MES_1
npr1a	4	0.00790514	4	0.00790514	0	0	0	0.0884149	MES_1
rps24	1	0.00197628	1	0.00197628	0	0	0	0.0266005	MES_1
enam	10	0.0197628	10	0.0197628	0	0	0	0.0832751	MES_1
nr1d2a	16	0.0316206	0	0	16	0.0316206	0	0.0968357	MES_1
agr1	3	0.00592885	3	0.00592885	0	0	0	0.0313273	MES_1
lmx1ba	20	0.0395257	0	0	20	0.0395257	0	0.0746358	MES_1
aopep	4	0.00790514	4	0.00790514	0	0	0	0.0167918	MES_1
fosab	23	0.0454545	7	0.013834	16	0.0316206	1327	0.214728	MES_1
aspn	10	0.0197628	10	0.0197628	0	0	0	0.133495	MES_1
atf3	23	0.0454545	0	0	23	0.0454545	0	0.150717	MES_1
krt93	5	0.00988142	5	0.00988142	0	0	0	0.101657	MES_1
nuggc.3	3	0.00592885	3	0.00592885	0	0	0	0.0915546	MES_1
her6	9	0.0177866	0	0	9	0.0177866	0	0.0505015	MES_1
bcam	13	0.0256917	13	0.0256917	0	0	0	0.147827	MES_1
klhl4	7	0.013834	7	0.013834	0	0	0	0.0962559	MES_1
meox2a	5	0.00988142	0	0	5	0.00988142	0	0.0195214	MES_1
ntn1a	8	0.0158103	8	0.0158103	0	0	0	0.0666504	MES_1
klf7a	18	0.0355731	2	0.00395257	16	0.0316206	825	0.108286	MES_1
tnfrsf9a	5	0.00988142	5	0.00988142	0	0	0	0.0743775	MES_1
cxcl18b	8	0.0158103	8	0.0158103	0	0	0	0.0871544	MES_1
ccdc80	5	0.00988142	5	0.00988142	0	0	0	0.0616187	MES_1
si:ch211-156j16.1	4	0.00790514	4	0.00790514	0	0	0	0.0578711	MES_1
f3a	5	0.00988142	5	0.00988142	0	0	0	0.0616797	MES_1
frem3	2	0.00395257	2	0.00395257	0	0	0	0.0684893	MES_1
tmprss4a	5	0.00988142	5	0.00988142	0	0	0	0.0665043	MES_1
abi3bpb	15	0.0296443	15	0.0296443	0	0	0	0.266141	MES_1
bmpr1ba	9	0.0177866	9	0.0177866	0	0	0	0.116566	MES_1
ptgdsb.1	5	0.00988142	5	0.00988142	0	0	0	0.0416908	MES_1
rflna	2	0.00395257	2	0.00395257	0	0	0	0.0760074	MES_1
tgm5l	2	0.00395257	2	0.00395257	0	0	0	0.0396246	MES_1
arid5b	5	0.00988142	0	0	5	0.00988142	0	0.0404336	MES_1
itga9	2	0.00395257	2	0.00395257	0	0	0	0.0218121	MES_1
bcl11ab	3	0.00592885	0	0	3	0.00592885	0	0.00682171	MES_1
adcy2b	5	0.00988142	5	0.00988142	0	0	0	0.0277423	MES_1
rps23	2	0.00395257	2	0.00395257	0	0	0	0.0243025	MES_1
cldn7b	7	0.013834	7	0.013834	0	0	0	0.13831	MES_1
sdc4	6	0.0118577	6	0.0118577	0	0	0	0.0893995	MES_1
cobll1b	6	0.0118577	6	0.0118577	0	0	0	0.0461835	MES_1
evpla	8	0.0158103	8	0.0158103	0	0	0	0.115416	MES_1
mhc1zba	8	0.0158103	8	0.0158103	0	0	0	0.115875	MES_1
smoc1	3	0.00592885	3	0.00592885	0	0	0	0.0475771	MES_1
ptprfb	7	0.013834	7	0.013834	0	0	0	0.135692	MES_1
plxna3	5	0.00988142	5	0.00988142	0	0	0	0.0506764	MES_1
hlfa	10	0.0197628	0	0	10	0.0197628	0	0.0495998	MES_1
lama5	6	0.0118577	6	0.0118577	0	0	0	0.0430522	MES_1
ugt8	4	0.00790514	4	0.00790514	0	0	0	0.0751298	MES_1
dlx4a	22	0.0434783	0	0	22	0.0434783	0	0.107736	MES_1
cdh7a	3	0.00592885	3	0.00592885	0	0	0	0.0277709	MES_1
rcn3	7	0.013834	7	0.013834	0	0	0	0.0643612	MES_1
baiap2l1a	2	0.00395257	2	0.00395257	0	0	0	0.0168773	MES_1
lum	15	0.0296443	15	0.0296443	0	0	0	0.143773	MES_1
lamb1a	5	0.00988142	5	0.00988142	0	0	0	0.0284345	MES_1
col11a1b	11	0.0217391	11	0.0217391	0	0	0	0.0902826	MES_1
rxraa	10	0.0197628	0	0	10	0.0197628	0	0.0616388	MES_1
mmp9	5	0.00988142	5	0.00988142	0	0	0	0.0574108	MES_1
arid3a	5	0.00988142	0	0	5	0.00988142	0	0.0261796	MES_1
c1qtnf5	9	0.0177866	9	0.0177866	0	0	0	0.0711194	MES_1
chst11	10	0.0197628	10	0.0197628	0	0	0	0.0994089	MES_1
nfat5b	2	0.00395257	0	0	2	0.00395257	0	0.0172615	MES_1
entpd1	5	0.00988142	5	0.00988142	0	0	0	0.0434559	MES_1
stard14	2	0.00395257	2	0.00395257	0	0	0	0.0350537	MES_1
meis3	17	0.0335968	0	0	17	0.0335968	0	0.116894	MES_1
f5	5	0.00988142	5	0.00988142	0	0	0	0.0846556	MES_1
cxadr	3	0.00592885	3	0.00592885	0	0	0	0.0252885	MES_1
il1b	1	0.00197628	1	0.00197628	0	0	0	0.0168752	MES_1
cst14b.1	2	0.00395257	2	0.00395257	0	0	0	0.0753366	MES_1
zeb1b	4	0.00790514	0	0	4	0.00790514	0	0.0425715	MES_1
enpp1	6	0.0118577	6	0.0118577	0	0	0	0.110016	MES_1
gmds	4	0.00790514	4	0.00790514	0	0	0	0.0416207	MES_1
nfic	13	0.0256917	0	0	13	0.0256917	0	0.108019	MES_1
hmgn2	5	0.00988142	5	0.00988142	0	0	0	0.0373773	MES_1
ccn2a	6	0.0118577	6	0.0118577	0	0	0	0.0268729	MES_1
thbs4b	5	0.00988142	5	0.00988142	0	0	0	0.0348353	MES_1
ncam1a	11	0.0217391	11	0.0217391	0	0	0	0.128641	MES_1
timp2b	7	0.013834	7	0.013834	0	0	0	0.0559655	MES_1
htra1b	5	0.00988142	5	0.00988142	0	0	0	0.0963015	MES_1
dusp5	4	0.00790514	4	0.00790514	0	0	0	0.0571854	MES_1
rbpjb	3	0.00592885	0	0	3	0.00592885	0	0.0165636	MES_1
gli2a	11	0.0217391	3	0.00592885	8	0.0158103	23	0.0544393	MES_1
rnf220a	5	0.00988142	5	0.00988142	0	0	0	0.0797535	MES_1
plce1	1	0.00197628	1	0.00197628	0	0	0	0.0108031	MES_1
zbtb16a	6	0.0118577	6	0.0118577	0	0	0	0.067691	MES_1
nbn	1	0.00197628	1	0.00197628	0	0	0	0.0558293	MES_1
ezra	1	0.00197628	1	0.00197628	0	0	0	0.0253224	MES_1
mitfb	5	0.00988142	0	0	5	0.00988142	0	0.0253453	MES_1
b2ml	6	0.0118577	6	0.0118577	0	0	0	0.078618	MES_1
cav1	5	0.00988142	5	0.00988142	0	0	0	0.0602147	MES_1
chsy1	5	0.00988142	5	0.00988142	0	0	0	0.0485263	MES_1
elovl1a	5	0.00988142	5	0.00988142	0	0	0	0.0714959	MES_1
pdlim7	5	0.00988142	5	0.00988142	0	0	0	0.0661265	MES_1
grem2b	2	0.00395257	2	0.00395257	0	0	0	0.0226466	MES_1
actn4	4	0.00790514	4	0.00790514	0	0	0	0.0567591	MES_1
pah	6	0.0118577	6	0.0118577	0	0	0	0.0491223	MES_1
igsf3	2	0.00395257	2	0.00395257	0	0	0	0.0109703	MES_1
ptgis	6	0.0118577	6	0.0118577	0	0	0	0.0975667	MES_1
wif1	1	0.00197628	1	0.00197628	0	0	0	0.00584252	MES_1
alcama	1	0.00197628	1	0.00197628	0	0	0	0.0225211	MES_1
osr1	4	0.00790514	0	0	4	0.00790514	0	0.0166626	MES_1
pard6b	3	0.00592885	3	0.00592885	0	0	0	0.0286882	MES_1
degs2	2	0.00395257	2	0.00395257	0	0	0	0.0257821	MES_1
nav3	5	0.00988142	5	0.00988142	0	0	0	0.0675972	MES_1
hip1rb	2	0.00395257	2	0.00395257	0	0	0	0.0201754	MES_1
hbegfa	4	0.00790514	4	0.00790514	0	0	0	0.0624122	MES_1
col4a5	4	0.00790514	4	0.00790514	0	0	0	0.0612362	MES_1
fn1a	12	0.0237154	12	0.0237154	0	0	0	0.0647854	MES_1
nedd9	5	0.00988142	5	0.00988142	0	0	0	0.0318891	MES_1
ptprfa	2	0.00395257	2	0.00395257	0	0	0	0.0596803	MES_1
zgc:154058	4	0.00790514	4	0.00790514	0	0	0	0.0409375	MES_1
spp1	1	0.00197628	1	0.00197628	0	0	0	0.0212899	MES_1
rpl28	1	0.00197628	1	0.00197628	0	0	0	0.0200189	MES_1
nr3c2	12	0.0237154	0	0	12	0.0237154	0	0.0515031	MES_1
egr4	2	0.00395257	0	0	2	0.00395257	0	0.00573433	MES_1
spns2	4	0.00790514	4	0.00790514	0	0	0	0.0423477	MES_1
unc5b	1	0.00197628	1	0.00197628	0	0	0	0.0511565	MES_1
macrod2	5	0.00988142	5	0.00988142	0	0	0	0.0644468	MES_1
pdlim2	4	0.00790514	4	0.00790514	0	0	0	0.0469537	MES_1
nkx3-1	8	0.0158103	0	0	8	0.0158103	0	0.0154206	MES_1
hsd17b12a	4	0.00790514	4	0.00790514	0	0	0	0.0379227	MES_1
igfbp1a	1	0.00197628	1	0.00197628	0	0	0	0.0506181	MES_1
cd74b	3	0.00592885	3	0.00592885	0	0	0	0.0414343	MES_1
serpine2	5	0.00988142	5	0.00988142	0	0	0	0.0938552	MES_1
ano1	2	0.00395257	2	0.00395257	0	0	0	0.0225072	MES_1
ier2b	4	0.00790514	4	0.00790514	0	0	0	0.0230776	MES_1
pleca	2	0.00395257	2	0.00395257	0	0	0	0.0289385	MES_1
crhbp	1	0.00197628	1	0.00197628	0	0	0	0.000834836	MES_1
tlx2	2	0.00395257	0	0	2	0.00395257	0	0.0217236	MES_1
midn	3	0.00592885	3	0.00592885	0	0	0	0.0492415	MES_1
lepb	4	0.00790514	4	0.00790514	0	0	0	0.0717429	MES_1
slc51a	2	0.00395257	2	0.00395257	0	0	0	0.0164661	MES_1
si:ch211-79k12.1	3	0.00592885	3	0.00592885	0	0	0	0.020727	MES_1
inhbab	4	0.00790514	4	0.00790514	0	0	0	0.070462	MES_1
furina	7	0.013834	7	0.013834	0	0	0	0.0595862	MES_1
krt96	1	0.00197628	1	0.00197628	0	0	0	0.0491849	MES_1
bhmt	8	0.0158103	8	0.0158103	0	0	0	0.0703118	MES_1
asap3	4	0.00790514	4	0.00790514	0	0	0	0.0370135	MES_1
stat5a	2	0.00395257	0	0	2	0.00395257	0	0.0232831	MES_1
creb5b	12	0.0237154	0	0	12	0.0237154	0	0.0470144	MES_1
krt5	5	0.00988142	5	0.00988142	0	0	0	0.102738	MES_1
ucmaa	5	0.00988142	5	0.00988142	0	0	0	0.0281916	MES_1
pfn1	3	0.00592885	3	0.00592885	0	0	0	0.0536977	MES_1
angptl2b	8	0.0158103	8	0.0158103	0	0	0	0.064527	MES_1
loxl2a	7	0.013834	7	0.013834	0	0	0	0.10778	MES_1
ppap2d	2	0.00395257	2	0.00395257	0	0	0	0.0298698	MES_1
rbms3	7	0.013834	7	0.013834	0	0	0	0.107323	MES_1
mhc2dab	1	0.00197628	1	0.00197628	0	0	0	0.0131118	MES_1
fgfr3	3	0.00592885	3	0.00592885	0	0	0	0.0354247	MES_1
lrmda	4	0.00790514	4	0.00790514	0	0	0	0.071381	MES_1
rnf213a	5	0.00988142	5	0.00988142	0	0	0	0.0810141	MES_1
nid1b	4	0.00790514	4	0.00790514	0	0	0	0.0840064	MES_1
pnp5a	6	0.0118577	6	0.0118577	0	0	0	0.0885452	MES_1
celf2	4	0.00790514	4	0.00790514	0	0	0	0.0416887	MES_1
notch1a	1	0.00197628	1	0.00197628	0	0	0	0.0237367	MES_1
scube3	4	0.00790514	4	0.00790514	0	0	0	0.0449388	MES_1
sgms1	1	0.00197628	1	0.00197628	0	0	0	0.0198402	MES_1
tjp3	3	0.00592885	3	0.00592885	0	0	0	0.0261431	MES_1
cthrc1a	1	0.00197628	1	0.00197628	0	0	0	0.0116118	MES_1
matn4	1	0.00197628	1	0.00197628	0	0	0	0.00519285	MES_1
col27a1b	5	0.00988142	5	0.00988142	0	0	0	0.0388633	MES_1
thbs3a	5	0.00988142	5	0.00988142	0	0	0	0.044059	MES_1
klf15	7	0.013834	0	0	7	0.013834	0	0.0500276	MES_1
alx4b	7	0.013834	0	0	7	0.013834	0	0.025846	MES_1
ephb2b	2	0.00395257	2	0.00395257	0	0	0	0.0254933	MES_1
tinagl1	1	0.00197628	1	0.00197628	0	0	0	0.0443711	MES_1
cd74a	4	0.00790514	4	0.00790514	0	0	0	0.0353489	MES_1
hsp70.3	1	0.00197628	1	0.00197628	0	0	0	0.0155028	MES_1
bcar1	5	0.00988142	5	0.00988142	0	0	0	0.0376205	MES_1
wt1b	6	0.0118577	0	0	6	0.0118577	0	0.0175823	MES_1
sema4ba	6	0.0118577	6	0.0118577	0	0	0	0.0985254	MES_1
rps27l	3	0.00592885	3	0.00592885	0	0	0	0.0282298	MES_1
cxcl8b.1	2	0.00395257	2	0.00395257	0	0	0	0.00689923	MES_1
fstl1b	3	0.00592885	3	0.00592885	0	0	0	0.0501407	MES_1
epha3	1	0.00197628	1	0.00197628	0	0	0	0.0086546	MES_1
csf1ra	4	0.00790514	4	0.00790514	0	0	0	0.0268143	MES_1
tcnbb	7	0.013834	7	0.013834	0	0	0	0.068016	MES_1
nppc	5	0.00988142	5	0.00988142	0	0	0	0.059599	MES_1
syt7b	2	0.00395257	2	0.00395257	0	0	0	0.0305033	MES_1
fgfr1b	5	0.00988142	5	0.00988142	0	0	0	0.0617904	MES_1
ca10a	1	0.00197628	1	0.00197628	0	0	0	0.0426807	MES_1
s1pr5a	1	0.00197628	1	0.00197628	0	0	0	0.00465223	MES_1
il34	1	0.00197628	1	0.00197628	0	0	0	0.00976342	MES_1
krt4	2	0.00395257	2	0.00395257	0	0	0	0.0211655	MES_1
nr2f2	1	0.00197628	0	0	1	0.00197628	0	0.00272504	MES_1
zgc:113307	1	0.00197628	1	0.00197628	0	0	0	0.00927757	MES_1
sulf1	3	0.00592885	3	0.00592885	0	0	0	0.0439149	MES_1
ndrg1a	1	0.00197628	1	0.00197628	0	0	0	0.0121591	MES_1
robo1	5	0.00988142	5	0.00988142	0	0	0	0.0907987	MES_1
epha4b	1	0.00197628	1	0.00197628	0	0	0	0.00299453	MES_1
rhcgl1	3	0.00592885	3	0.00592885	0	0	0	0.0171337	MES_1
ctss2.2	1	0.00197628	1	0.00197628	0	0	0	0.00599254	MES_1
rplp2l	1	0.00197628	1	0.00197628	0	0	0	0.0235339	MES_1
mybl1	2	0.00395257	0	0	2	0.00395257	0	0.00683642	MES_1
tgfbr3	1	0.00197628	1	0.00197628	0	0	0	0.000278627	MES_1
zgc:153911	5	0.00988142	5	0.00988142	0	0	0	0.0621958	MES_1
hsp70.2	1	0.00197628	1	0.00197628	0	0	0	0.0143677	MES_1
col1a2	2	0.00395257	2	0.00395257	0	0	0	0.0297254	MES_1
rps6ka3b	1	0.00197628	1	0.00197628	0	0	0	0.0401293	MES_1
spon1b	1	0.00197628	1	0.00197628	0	0	0	0.0080004	MES_1
prox1a	3	0.00592885	0	0	3	0.00592885	0	0.0138113	MES_1
hsp90aa1.2	1	0.00197628	1	0.00197628	0	0	0	0.00387893	MES_1
slc43a3b	1	0.00197628	1	0.00197628	0	0	0	0.0102069	MES_1
efnb3b	5	0.00988142	5	0.00988142	0	0	0	0.0381062	MES_1
kazald3	2	0.00395257	2	0.00395257	0	0	0	0.0148383	MES_1
anxa11a	3	0.00592885	3	0.00592885	0	0	0	0.038856	MES_1
igfbp5b	7	0.013834	7	0.013834	0	0	0	0.0952542	MES_1
ebf1b	2	0.00395257	0	0	2	0.00395257	0	0.0254456	MES_1
rorc	4	0.00790514	0	0	4	0.00790514	0	0.0451121	MES_1
btbd11a	1	0.00197628	1	0.00197628	0	0	0	0.0136748	MES_1
serpinh1b	4	0.00790514	4	0.00790514	0	0	0	0.0373212	MES_1
prss35	1	0.00197628	1	0.00197628	0	0	0	0.0394903	MES_1
cxcl14	3	0.00592885	3	0.00592885	0	0	0	0.0237494	MES_1
rgs3a	2	0.00395257	2	0.00395257	0	0	0	0.0568735	MES_1
crip1	1	0.00197628	1	0.00197628	0	0	0	0.00299211	MES_1
kremen1	3	0.00592885	3	0.00592885	0	0	0	0.0163679	MES_1
pnocb	3	0.00592885	3	0.00592885	0	0	0	0.0283742	MES_1
pparaa	2	0.00395257	0	0	2	0.00395257	0	0.0125528	MES_1
f13a1b	5	0.00988142	5	0.00988142	0	0	0	0.0379115	MES_1
hopx	1	0.00197628	1	0.00197628	0	0	0	0.0225283	MES_1
rarab	12	0.0237154	0	0	12	0.0237154	0	0.0389846	MES_1
fstl1a	1	0.00197628	1	0.00197628	0	0	0	0.039	MES_1
crim1	2	0.00395257	2	0.00395257	0	0	0	0.0366529	MES_1
tuft1a	2	0.00395257	2	0.00395257	0	0	0	0.0294823	MES_1
dennd4a	3	0.00592885	3	0.00592885	0	0	0	0.0618271	MES_1
heyl	3	0.00592885	0	0	3	0.00592885	0	0.0173936	MES_1
crabp1b	1	0.00197628	1	0.00197628	0	0	0	0.00779717	MES_1
dkk2	2	0.00395257	2	0.00395257	0	0	0	0.017424	MES_1
arhgef1b	2	0.00395257	2	0.00395257	0	0	0	0.00894674	MES_1
si:ch211-153j24.3	2	0.00395257	0	0	2	0.00395257	0	0.00872187	MES_1
cyp26b1	1	0.00197628	1	0.00197628	0	0	0	0.0163552	MES_1
olfml2ba	1	0.00197628	1	0.00197628	0	0	0	0.00288652	MES_1
gse1	3	0.00592885	3	0.00592885	0	0	0	0.0224161	MES_1
add3a	2	0.00395257	2	0.00395257	0	0	0	0.0126371	MES_1
osbpl3a	2	0.00395257	2	0.00395257	0	0	0	0.0145326	MES_1
cdk6	2	0.00395257	2	0.00395257	0	0	0	0.0088194	MES_1
pde10a	1	0.00197628	1	0.00197628	0	0	0	0.0207496	MES_1
wnt5b	2	0.00395257	2	0.00395257	0	0	0	0.0407288	MES_1
ptgdsb.2	3	0.00592885	3	0.00592885	0	0	0	0.05791	MES_1
tnk1	1	0.00197628	1	0.00197628	0	0	0	0.0108394	MES_1
col1a1b	3	0.00592885	3	0.00592885	0	0	0	0.0312015	MES_1
gfpt2	1	0.00197628	1	0.00197628	0	0	0	0.0189309	MES_1
ugt5f1	1	0.00197628	1	0.00197628	0	0	0	0.0102876	MES_1
angptl1a	3	0.00592885	3	0.00592885	0	0	0	0.0386992	MES_1
slit2	1	0.00197628	1	0.00197628	0	0	0	0.00834376	MES_1
mt2	1	0.00197628	1	0.00197628	0	0	0	0.0143787	MES_1
pcp4a	1	0.00197628	1	0.00197628	0	0	0	0.0131614	MES_1
rasa4	1	0.00197628	1	0.00197628	0	0	0	0.0150028	MES_1
ripor2	1	0.00197628	1	0.00197628	0	0	0	0.0186287	MES_1
ripor1	1	0.00197628	1	0.00197628	0	0	0	0.0153195	MES_1
hnf4g	1	0.00197628	0	0	1	0.00197628	0	0.00408357	MES_1
rfx3	2	0.00395257	0	0	2	0.00395257	0	0.0140061	MES_1
hspa5	3	0.00592885	3	0.00592885	0	0	0	0.0339509	MES_1
trim16	2	0.00395257	2	0.00395257	0	0	0	0.0216429	MES_1
slc38a3a	1	0.00197628	1	0.00197628	0	0	0	0.00786217	MES_1
ek1	1	0.00197628	1	0.00197628	0	0	0	0.00278485	MES_1
sfrp2	1	0.00197628	1	0.00197628	0	0	0	0.00716151	MES_1
rplp0	3	0.00592885	3	0.00592885	0	0	0	0.01328	MES_1
si:ch211-243a20.3	2	0.00395257	2	0.00395257	0	0	0	0.0178648	MES_1
fstb	4	0.00790514	4	0.00790514	0	0	0	0.015875	MES_1
barhl1a	2	0.00395257	0	0	2	0.00395257	0	0.00941108	MES_1
chrdl2	1	0.00197628	1	0.00197628	0	0	0	0.0146929	MES_1
asip2b	1	0.00197628	1	0.00197628	0	0	0	0.00271943	MES_1
pgr	3	0.00592885	0	0	3	0.00592885	0	0.0083789	MES_1
ezrb	2	0.00395257	2	0.00395257	0	0	0	0.0124384	MES_1
ccnd2a	2	0.00395257	2	0.00395257	0	0	0	0.0176888	MES_1
sparc	3	0.00592885	3	0.00592885	0	0	0	0.013234	MES_1
zgc:152791	2	0.00395257	2	0.00395257	0	0	0	0.00914716	MES_1
tfeb	1	0.00197628	0	0	1	0.00197628	0	0.000560281	MES_1
hsp70l	1	0.00197628	1	0.00197628	0	0	0	0.00330866	MES_1
fstl3	4	0.00790514	4	0.00790514	0	0	0	0.0386121	MES_1
tgfb2	2	0.00395257	2	0.00395257	0	0	0	0.015454	MES_1
vcanb	1	0.00197628	1	0.00197628	0	0	0	0.00852359	MES_1
mamdc2a	1	0.00197628	1	0.00197628	0	0	0	0.0171316	MES_1
kcnma1a	1	0.00197628	1	0.00197628	0	0	0	0.0337005	MES_1
chmp6b	2	0.00395257	2	0.00395257	0	0	0	0.0332373	MES_1
lmna	3	0.00592885	3	0.00592885	0	0	0	0.0143886	MES_1
tmem198b	1	0.00197628	1	0.00197628	0	0	0	0.0129635	MES_1
hey2	1	0.00197628	0	0	1	0.00197628	0	0.00295239	MES_1
rpl7a	1	0.00197628	1	0.00197628	0	0	0	0.0191395	MES_1
lfng	1	0.00197628	1	0.00197628	0	0	0	0.00215377	MES_1
batf	2	0.00395257	0	0	2	0.00395257	0	0.00898205	MES_1
selenop	1	0.00197628	1	0.00197628	0	0	0	0.00281129	MES_1
si:ch211-202p1.5	1	0.00197628	1	0.00197628	0	0	0	0.0138201	MES_1
ogfrl2	1	0.00197628	1	0.00197628	0	0	0	0.0328018	MES_1
igf2bp2a	1	0.00197628	1	0.00197628	0	0	0	0.00752286	MES_1
zcchc24	2	0.00395257	2	0.00395257	0	0	0	0.0158677	MES_1
arid3c	1	0.00197628	0	0	1	0.00197628	0	0	MES_1
adgrv1	1	0.00197628	1	0.00197628	0	0	0	0	MES_1
pcna	1	0.00197628	1	0.00197628	0	0	0	0.0187016	MES_1
icn	2	0.00395257	2	0.00395257	0	0	0	0.00595332	MES_1
scinla	1	0.00197628	1	0.00197628	0	0	0	0.00745286	MES_1
csf1a	1	0.00197628	1	0.00197628	0	0	0	0.00501585	MES_1
pax7b	1	0.00197628	0	0	1	0.00197628	0	0.0033095	MES_1
spock3	2	0.00395257	2	0.00395257	0	0	0	0.0221888	MES_1
tspan18b	1	0.00197628	1	0.00197628	0	0	0	0.0321782	MES_1
lhfpl6	1	0.00197628	1	0.00197628	0	0	0	0.00822864	MES_1
sik1	1	0.00197628	1	0.00197628	0	0	0	0.0144364	MES_1
tnfaip8l3	1	0.00197628	1	0.00197628	0	0	0	0.0133774	MES_1
cacna1c	1	0.00197628	1	0.00197628	0	0	0	0.00731308	MES_1
srgn	1	0.00197628	1	0.00197628	0	0	0	0.0160264	MES_1
col5a3b	1	0.00197628	1	0.00197628	0	0	0	0.000555969	MES_1
aste1a	2	0.00395257	2	0.00395257	0	0	0	0.0165215	MES_1
elovl6l	1	0.00197628	1	0.00197628	0	0	0	0.00870949	MES_1
nt5e	1	0.00197628	1	0.00197628	0	0	0	0.00245144	MES_1
hmox1a	1	0.00197628	1	0.00197628	0	0	0	0.0313153	MES_1
pfkfb3	1	0.00197628	1	0.00197628	0	0	0	0.00543967	MES_1
robo3	2	0.00395257	2	0.00395257	0	0	0	0.00542773	MES_1
emilin1b	1	0.00197628	1	0.00197628	0	0	0	0.0132987	MES_1
mgst1.2	1	0.00197628	1	0.00197628	0	0	0	0.00897202	MES_1
cpn1	1	0.00197628	1	0.00197628	0	0	0	0.00225502	MES_1
krt17	1	0.00197628	1	0.00197628	0	0	0	0.00378835	MES_1
nfkbiaa	1	0.00197628	1	0.00197628	0	0	0	0.00285982	MES_1
pdlim4	1	0.00197628	1	0.00197628	0	0	0	0.00885555	MES_1
neurod6a	1	0.00197628	0	0	1	0.00197628	0	0.00383188	MES_1
slc6a8	1	0.00197628	1	0.00197628	0	0	0	0.0130976	MES_1
enah	1	0.00197628	1	0.00197628	0	0	0	0.00883769	MES_1
tmprss13b	2	0.00395257	2	0.00395257	0	0	0	0.00495794	MES_1
spi1b	2	0.00395257	0	0	2	0.00395257	0	0.0030952	MES_1
crip2	1	0.00197628	1	0.00197628	0	0	0	0.00149961	MES_1
col5a2a	1	0.00197628	1	0.00197628	0	0	0	0.0066047	MES_1
tspan35	1	0.00197628	1	0.00197628	0	0	0	0.0300125	MES_1
diaph3	1	0.00197628	1	0.00197628	0	0	0	0.00323173	MES_1
si:dkey-1h24.2	1	0.00197628	1	0.00197628	0	0	0	0.0163173	MES_1
spon2b	1	0.00197628	1	0.00197628	0	0	0	0.00747246	MES_1
col1a1a	1	0.00197628	1	0.00197628	0	0	0	0.00215808	MES_1
niban1a	1	0.00197628	1	0.00197628	0	0	0	0.0134225	MES_1
pbx3b	1	0.00197628	0	0	1	0.00197628	0	0.00436751	MES_1
lrrc4ca	1	0.00197628	1	0.00197628	0	0	0	0.0169923	MES_1
bicdl2l	1	0.00197628	1	0.00197628	0	0	0	0.00813125	MES_1
si:dkey-221j11.3	1	0.00197628	1	0.00197628	0	0	0	0.00850558	MES_1
tnfrsf18	1	0.00197628	1	0.00197628	0	0	0	0.00808542	MES_1
pknox2	88	0.185263	6	0.0126316	82	0.172632	1316	0.908483	MES_10
cdh1	19	0.04	19	0.04	0	0	0	0.456993	MES_10
klf8	56	0.117895	3	0.00631579	53	0.111579	2296	0.538829	MES_10
perp	17	0.0357895	17	0.0357895	0	0	0	0.339437	MES_10
nfixb	21	0.0442105	0	0	21	0.0442105	0	0.238295	MES_10
tp63	34	0.0715789	19	0.04	15	0.0315789	3819	0.607672	MES_10
cldna	11	0.0231579	11	0.0231579	0	0	0	0.267367	MES_10
foxp4	78	0.164211	7	0.0147368	71	0.149474	5516	1	MES_10
frem2a	17	0.0357895	17	0.0357895	0	0	0	0.356873	MES_10
plch2a	10	0.0210526	10	0.0210526	0	0	0	0.222667	MES_10
trps1	12	0.0252632	1	0.00210526	11	0.0231579	134	0.158184	MES_10
grhl2a	47	0.0989474	6	0.0126316	41	0.0863158	1353	0.377963	MES_10
tmem176l.4	6	0.0126316	6	0.0126316	0	0	0	0.183919	MES_10
tcf7l2	20	0.0421053	0	0	20	0.0421053	0	0.144685	MES_10
krt91	13	0.0273684	13	0.0273684	0	0	0	0.116341	MES_10
baiap2a	10	0.0210526	10	0.0210526	0	0	0	0.354307	MES_10
krt97	5	0.0105263	5	0.0105263	0	0	0	0.263285	MES_10
scel	9	0.0189474	9	0.0189474	0	0	0	0.253668	MES_10
krt94	17	0.0357895	17	0.0357895	0	0	0	0.301294	MES_10
raraa	33	0.0694737	0	0	33	0.0694737	0	0.29062	MES_10
bach2b	20	0.0421053	0	0	20	0.0421053	0	0.11854	MES_10
cygb1	8	0.0168421	8	0.0168421	0	0	0	0.0860238	MES_10
frem2b	11	0.0231579	11	0.0231579	0	0	0	0.298934	MES_10
aqp3a	9	0.0189474	9	0.0189474	0	0	0	0.203355	MES_10
runx2a	19	0.04	0	0	19	0.04	0	0.109096	MES_10
ogna	5	0.0105263	5	0.0105263	0	0	0	0.0465405	MES_10
myh9a	11	0.0231579	11	0.0231579	0	0	0	0.22967	MES_10
runx3	23	0.0484211	0	0	23	0.0484211	0	0.136135	MES_10
daam1b	6	0.0126316	6	0.0126316	0	0	0	0.0555586	MES_10
apoeb	19	0.04	19	0.04	0	0	0	0.382735	MES_10
thy1	7	0.0147368	7	0.0147368	0	0	0	0.249662	MES_10
and2	5	0.0105263	5	0.0105263	0	0	0	0.15418	MES_10
foxp1b	62	0.130526	0	0	62	0.130526	0	0.643135	MES_10
nfic	19	0.04	0	0	19	0.04	0	0.235823	MES_10
fosab	36	0.0757895	6	0.0126316	30	0.0631579	1291	0.29926	MES_10
pdgfrb	4	0.00842105	4	0.00842105	0	0	0	0.0625593	MES_10
nr4a1	27	0.0568421	0	0	27	0.0568421	0	0.24479	MES_10
itgb4	16	0.0336842	16	0.0336842	0	0	0	0.178622	MES_10
arid5b	6	0.0126316	0	0	6	0.0126316	0	0.0328941	MES_10
itga9	7	0.0147368	7	0.0147368	0	0	0	0.0839066	MES_10
dlx4a	45	0.0947368	0	0	45	0.0947368	0	0.48534	MES_10
ches1	40	0.0842105	0	0	40	0.0842105	0	0.248672	MES_10
itga6b	8	0.0168421	8	0.0168421	0	0	0	0.150205	MES_10
jag1a	5	0.0105263	5	0.0105263	0	0	0	0.181323	MES_10
twist1a	29	0.0610526	2	0.00421053	27	0.0568421	268	0.204077	MES_10
fosl1a	59	0.124211	6	0.0126316	53	0.111579	3629	0.526031	MES_10
phlda2	12	0.0252632	12	0.0252632	0	0	0	0.166692	MES_10
cux1a	28	0.0589474	0	0	28	0.0589474	0	0.167829	MES_10
pmp22b	5	0.0105263	5	0.0105263	0	0	0	0.103425	MES_10
nr4a3	36	0.0757895	0	0	36	0.0757895	0	0.274633	MES_10
adam8a	11	0.0231579	11	0.0231579	0	0	0	0.170868	MES_10
fn1b	17	0.0357895	17	0.0357895	0	0	0	0.326935	MES_10
rfx2	30	0.0631579	1	0.00210526	29	0.0610526	1507	0.305289	MES_10
ppl	7	0.0147368	7	0.0147368	0	0	0	0.108469	MES_10
cast	12	0.0252632	12	0.0252632	0	0	0	0.191758	MES_10
elf3	54	0.113684	0	0	54	0.113684	0	0.296778	MES_10
fa2h	4	0.00842105	4	0.00842105	0	0	0	0.0800146	MES_10
twist2	19	0.04	0	0	19	0.04	0	0.140137	MES_10
jun	38	0.08	3	0.00631579	35	0.0736842	591	0.376626	MES_10
eppk1	15	0.0315789	15	0.0315789	0	0	0	0.241371	MES_10
tnika	13	0.0273684	13	0.0273684	0	0	0	0.193284	MES_10
zgc:153665	14	0.0294737	14	0.0294737	0	0	0	0.30064	MES_10
esr2a	38	0.08	0	0	38	0.08	0	0.35656	MES_10
cldni	19	0.04	19	0.04	0	0	0	0.200892	MES_10
nfixa	17	0.0357895	0	0	17	0.0357895	0	0.159823	MES_10
si:busm1-57f23.1	13	0.0273684	13	0.0273684	0	0	0	0.249343	MES_10
ebf3a	6	0.0126316	0	0	6	0.0126316	0	0.108324	MES_10
frem3	9	0.0189474	9	0.0189474	0	0	0	0.217046	MES_10
klf2a	21	0.0442105	0	0	21	0.0442105	0	0.199004	MES_10
alpi.1	12	0.0252632	12	0.0252632	0	0	0	0.327006	MES_10
im:7142702	9	0.0189474	0	0	9	0.0189474	0	0.0363118	MES_10
myo5b	6	0.0126316	6	0.0126316	0	0	0	0.081722	MES_10
cacna1ba	11	0.0231579	11	0.0231579	0	0	0	0.170941	MES_10
lef1	16	0.0336842	1	0.00210526	15	0.0315789	10	0.0820863	MES_10
ecrg4a	17	0.0357895	17	0.0357895	0	0	0	0.152054	MES_10
si:ch211-157c3.4	3	0.00631579	3	0.00631579	0	0	0	0.0549128	MES_10
cldnb	17	0.0357895	17	0.0357895	0	0	0	0.205912	MES_10
bhlhe40	26	0.0547368	0	0	26	0.0547368	0	0.187138	MES_10
notch3	3	0.00631579	3	0.00631579	0	0	0	0.122316	MES_10
znf185	4	0.00842105	4	0.00842105	0	0	0	0.0989267	MES_10
slc38a3a	8	0.0168421	8	0.0168421	0	0	0	0.107445	MES_10
lama5	12	0.0252632	12	0.0252632	0	0	0	0.180971	MES_10
lmo7a	9	0.0189474	9	0.0189474	0	0	0	0.165155	MES_10
tbx2a	10	0.0210526	0	0	10	0.0210526	0	0.143102	MES_10
cebpd	10	0.0210526	0	0	10	0.0210526	0	0.107449	MES_10
stat3	8	0.0168421	2	0.00421053	6	0.0126316	406	0.0871282	MES_10
dsc2l	18	0.0378947	18	0.0378947	0	0	0	0.328294	MES_10
tcf7l1b	25	0.0526316	3	0.00631579	22	0.0463158	72	0.109351	MES_10
runx2b	8	0.0168421	1	0.00210526	7	0.0147368	35	0.0395447	MES_10
klf6a	29	0.0610526	8	0.0168421	21	0.0442105	1219	0.180864	MES_10
tph1b	9	0.0189474	9	0.0189474	0	0	0	0.0439895	MES_10
epha7	8	0.0168421	8	0.0168421	0	0	0	0.21714	MES_10
klf12a	20	0.0421053	0	0	20	0.0421053	0	0.161856	MES_10
thrab	33	0.0694737	0	0	33	0.0694737	0	0.139811	MES_10
nectin1b	11	0.0231579	11	0.0231579	0	0	0	0.238661	MES_10
arid3c	11	0.0231579	4	0.00842105	7	0.0147368	23	0.068608	MES_10
col1a2	16	0.0336842	16	0.0336842	0	0	0	0.156175	MES_10
foxo1b	22	0.0463158	0	0	22	0.0463158	0	0.0941834	MES_10
nr1d2a	17	0.0357895	0	0	17	0.0357895	0	0.173246	MES_10
macc1	4	0.00842105	4	0.00842105	0	0	0	0.0953238	MES_10
zgc:111983	11	0.0231579	11	0.0231579	0	0	0	0.145508	MES_10
sparc	7	0.0147368	7	0.0147368	0	0	0	0.132649	MES_10
bcam	14	0.0294737	14	0.0294737	0	0	0	0.154179	MES_10
epcam	16	0.0336842	16	0.0336842	0	0	0	0.296419	MES_10
prss35	7	0.0147368	7	0.0147368	0	0	0	0.155467	MES_10
atf3	31	0.0652632	0	0	31	0.0652632	0	0.179913	MES_10
f5	6	0.0126316	6	0.0126316	0	0	0	0.134867	MES_10
arhgef1b	6	0.0126316	6	0.0126316	0	0	0	0.0470714	MES_10
adamts3	5	0.0105263	5	0.0105263	0	0	0	0.103806	MES_10
vcanb	7	0.0147368	7	0.0147368	0	0	0	0.0475629	MES_10
sox6	41	0.0863158	0	0	41	0.0863158	0	0.188222	MES_10
tgfbi	6	0.0126316	6	0.0126316	0	0	0	0.0526637	MES_10
nfatc1	46	0.0968421	4	0.00842105	42	0.0884211	1632	0.269925	MES_10
malb	7	0.0147368	7	0.0147368	0	0	0	0.102599	MES_10
foxo3b	29	0.0610526	1	0.00210526	28	0.0589474	195	0.194492	MES_10
klhl4	5	0.0105263	5	0.0105263	0	0	0	0.0545761	MES_10
jdp2b	32	0.0673684	5	0.0105263	27	0.0568421	733	0.203528	MES_10
and1	11	0.0231579	11	0.0231579	0	0	0	0.160088	MES_10
sema4ba	9	0.0189474	9	0.0189474	0	0	0	0.164483	MES_10
ptgs2a	3	0.00631579	3	0.00631579	0	0	0	0.0577658	MES_10
rarab	17	0.0357895	0	0	17	0.0357895	0	0.108243	MES_10
lmx1ba	10	0.0210526	0	0	10	0.0210526	0	0.036452	MES_10
aopep	3	0.00631579	3	0.00631579	0	0	0	0.0104609	MES_10
ptprub	11	0.0231579	11	0.0231579	0	0	0	0.223179	MES_10
enam	11	0.0231579	11	0.0231579	0	0	0	0.0667223	MES_10
foxo1a	49	0.103158	0	0	49	0.103158	0	0.316482	MES_10
si:dkey-193p11.2	21	0.0442105	21	0.0442105	0	0	0	0.166981	MES_10
col18a1a	5	0.0105263	5	0.0105263	0	0	0	0.0453078	MES_10
robo3	9	0.0189474	9	0.0189474	0	0	0	0.106663	MES_10
bcl11ab	6	0.0126316	0	0	6	0.0126316	0	0.0297971	MES_10
celf2	10	0.0210526	10	0.0210526	0	0	0	0.0609975	MES_10
gse1	3	0.00631579	3	0.00631579	0	0	0	0.0213942	MES_10
dlx6a	5	0.0105263	0	0	5	0.0105263	0	0.0423996	MES_10
slit3	6	0.0126316	6	0.0126316	0	0	0	0.11188	MES_10
mdka	10	0.0210526	10	0.0210526	0	0	0	0.0888447	MES_10
nrg1	5	0.0105263	5	0.0105263	0	0	0	0.0876491	MES_10
sfrp1b	2	0.00421053	2	0.00421053	0	0	0	0.0745542	MES_10
gli2a	13	0.0273684	4	0.00842105	9	0.0189474	73	0.0900305	MES_10
serpinb1l4	8	0.0168421	8	0.0168421	0	0	0	0.163321	MES_10
rhpn2	4	0.00842105	4	0.00842105	0	0	0	0.0655679	MES_10
dmrt1	22	0.0463158	2	0.00421053	20	0.0421053	257	0.175288	MES_10
itga5	8	0.0168421	8	0.0168421	0	0	0	0.101243	MES_10
col1a1b	21	0.0442105	21	0.0442105	0	0	0	0.15551	MES_10
ugt8	6	0.0126316	6	0.0126316	0	0	0	0.0945235	MES_10
krt5	7	0.0147368	7	0.0147368	0	0	0	0.137881	MES_10
tfpia	7	0.0147368	7	0.0147368	0	0	0	0.182657	MES_10
klf15	4	0.00842105	0	0	4	0.00842105	0	0.0355233	MES_10
nr3c2	18	0.0378947	0	0	18	0.0378947	0	0.0983761	MES_10
col10a1a	6	0.0126316	6	0.0126316	0	0	0	0.0905002	MES_10
krt93	7	0.0147368	7	0.0147368	0	0	0	0.142436	MES_10
thbs4b	10	0.0210526	10	0.0210526	0	0	0	0.14273	MES_10
plcd1a	6	0.0126316	6	0.0126316	0	0	0	0.0866094	MES_10
vcana	10	0.0210526	10	0.0210526	0	0	0	0.0603877	MES_10
lepb	9	0.0189474	9	0.0189474	0	0	0	0.0735365	MES_10
rps27l	2	0.00421053	2	0.00421053	0	0	0	0.0319709	MES_10
mhc1uba	10	0.0210526	10	0.0210526	0	0	0	0.170779	MES_10
mef2cb	20	0.0421053	0	0	20	0.0421053	0	0.163426	MES_10
egr1	26	0.0547368	0	0	26	0.0547368	0	0.173337	MES_10
aspn	10	0.0210526	10	0.0210526	0	0	0	0.0618533	MES_10
kremen1	4	0.00842105	4	0.00842105	0	0	0	0.0495935	MES_10
tcnbb	8	0.0168421	8	0.0168421	0	0	0	0.13691	MES_10
cldn7b	5	0.0105263	5	0.0105263	0	0	0	0.152173	MES_10
mhc1zba	11	0.0231579	11	0.0231579	0	0	0	0.155641	MES_10
ptprfb	16	0.0336842	16	0.0336842	0	0	0	0.274279	MES_10
hmga2	31	0.0652632	4	0.00842105	27	0.0568421	1121	0.227713	MES_10
pawr	5	0.0105263	5	0.0105263	0	0	0	0.112196	MES_10
stat5a	4	0.00842105	0	0	4	0.00842105	0	0.0264601	MES_10
klf7a	22	0.0463158	1	0.00210526	21	0.0442105	155	0.133055	MES_10
dacha	15	0.0315789	15	0.0315789	0	0	0	0.147593	MES_10
ca10a	5	0.0105263	5	0.0105263	0	0	0	0.113289	MES_10
rbpjb	3	0.00631579	0	0	3	0.00631579	0	0.0244241	MES_10
junba	25	0.0526316	0	0	25	0.0526316	0	0.109845	MES_10
tnks1bp1	4	0.00842105	4	0.00842105	0	0	0	0.0661634	MES_10
evpla	10	0.0210526	10	0.0210526	0	0	0	0.144767	MES_10
zgc:154058	3	0.00631579	3	0.00631579	0	0	0	0.022349	MES_10
hmgn2	4	0.00842105	4	0.00842105	0	0	0	0.0396911	MES_10
mafk	31	0.0652632	0	0	31	0.0652632	0	0.182311	MES_10
dusp5	5	0.0105263	5	0.0105263	0	0	0	0.0758798	MES_10
jupa	15	0.0315789	15	0.0315789	0	0	0	0.273568	MES_10
ptgis	5	0.0105263	5	0.0105263	0	0	0	0.115353	MES_10
ccn1	10	0.0210526	10	0.0210526	0	0	0	0.101513	MES_10
tgfbr3	1	0.00210526	1	0.00210526	0	0	0	0.00724838	MES_10
pkp3a	17	0.0357895	17	0.0357895	0	0	0	0.310385	MES_10
thbs3a	9	0.0189474	9	0.0189474	0	0	0	0.0688485	MES_10
lhx9	16	0.0336842	0	0	16	0.0336842	0	0.0637637	MES_10
ar	20	0.0421053	0	0	20	0.0421053	0	0.10874	MES_10
meis3	6	0.0126316	0	0	6	0.0126316	0	0.0719346	MES_10
plce1	4	0.00842105	4	0.00842105	0	0	0	0.0313826	MES_10
ptprfa	5	0.0105263	5	0.0105263	0	0	0	0.105721	MES_10
serpine1	9	0.0189474	9	0.0189474	0	0	0	0.0658681	MES_10
lnx1	6	0.0126316	6	0.0126316	0	0	0	0.03646	MES_10
col4a5	6	0.0126316	6	0.0126316	0	0	0	0.101379	MES_10
runx1	14	0.0294737	0	0	14	0.0294737	0	0.058789	MES_10
midn	4	0.00842105	4	0.00842105	0	0	0	0.0792838	MES_10
tnn	3	0.00631579	3	0.00631579	0	0	0	0.0236583	MES_10
creb5b	11	0.0231579	0	0	11	0.0231579	0	0.0333782	MES_10
nfia	5	0.0105263	0	0	5	0.0105263	0	0.102425	MES_10
serpinh1b	16	0.0336842	16	0.0336842	0	0	0	0.192822	MES_10
hbegfa	6	0.0126316	6	0.0126316	0	0	0	0.0977791	MES_10
pleca	4	0.00842105	4	0.00842105	0	0	0	0.0721542	MES_10
gmds	4	0.00842105	4	0.00842105	0	0	0	0.0388387	MES_10
dkk3b	6	0.0126316	6	0.0126316	0	0	0	0.0471083	MES_10
wnt5b	11	0.0231579	11	0.0231579	0	0	0	0.111341	MES_10
npr1a	5	0.0105263	5	0.0105263	0	0	0	0.0720155	MES_10
col11a1a	12	0.0252632	12	0.0252632	0	0	0	0.143546	MES_10
igfbp5b	6	0.0126316	6	0.0126316	0	0	0	0.0809341	MES_10
loxa	7	0.0147368	7	0.0147368	0	0	0	0.10041	MES_10
elovl1a	5	0.0105263	5	0.0105263	0	0	0	0.0726379	MES_10
ppap2d	3	0.00631579	3	0.00631579	0	0	0	0.0551738	MES_10
ezra	3	0.00631579	3	0.00631579	0	0	0	0.0738905	MES_10
rps24	2	0.00421053	2	0.00421053	0	0	0	0.0448542	MES_10
cxcl14	6	0.0126316	6	0.0126316	0	0	0	0.046546	MES_10
pard6b	2	0.00421053	2	0.00421053	0	0	0	0.0249602	MES_10
tspan18b	7	0.0147368	7	0.0147368	0	0	0	0.0408744	MES_10
il1b	1	0.00210526	1	0.00210526	0	0	0	0.0224271	MES_10
lrmda	5	0.0105263	5	0.0105263	0	0	0	0.101182	MES_10
cldne	4	0.00842105	4	0.00842105	0	0	0	0.0334414	MES_10
cd74b	5	0.0105263	5	0.0105263	0	0	0	0.0710952	MES_10
fosb	8	0.0168421	0	0	8	0.0168421	0	0.0319327	MES_10
pcp4a	7	0.0147368	7	0.0147368	0	0	0	0.0370418	MES_10
meox2a	31	0.0652632	0	0	31	0.0652632	0	0.227611	MES_10
cobll1b	4	0.00842105	4	0.00842105	0	0	0	0.0319704	MES_10
sema6e	7	0.0147368	7	0.0147368	0	0	0	0.105403	MES_10
wt1b	1	0.00210526	0	0	1	0.00210526	0	0.00255996	MES_10
spns2	7	0.0147368	7	0.0147368	0	0	0	0.0939855	MES_10
cst14b.1	6	0.0126316	6	0.0126316	0	0	0	0.108313	MES_10
cd74a	6	0.0126316	6	0.0126316	0	0	0	0.0720428	MES_10
asap3	3	0.00631579	3	0.00631579	0	0	0	0.0562413	MES_10
timp2b	9	0.0189474	9	0.0189474	0	0	0	0.112851	MES_10
cxadr	3	0.00631579	3	0.00631579	0	0	0	0.0272741	MES_10
sox9a	23	0.0484211	0	0	23	0.0484211	0	0.129809	MES_10
gpc1b	3	0.00631579	3	0.00631579	0	0	0	0.0328901	MES_10
nrxn2a	6	0.0126316	6	0.0126316	0	0	0	0.0593607	MES_10
b2ml	6	0.0126316	6	0.0126316	0	0	0	0.109077	MES_10
dhrs13a.2	1	0.00210526	1	0.00210526	0	0	0	0.0170181	MES_10
tmprss4a	6	0.0126316	6	0.0126316	0	0	0	0.0799828	MES_10
kcnma1a	1	0.00210526	1	0.00210526	0	0	0	0.0571077	MES_10
sp7	10	0.0210526	0	0	10	0.0210526	0	0.0650055	MES_10
krt15	12	0.0252632	12	0.0252632	0	0	0	0.119933	MES_10
robo1	6	0.0126316	6	0.0126316	0	0	0	0.127111	MES_10
nbn	2	0.00421053	2	0.00421053	0	0	0	0.0637423	MES_10
cx43	1	0.00210526	1	0.00210526	0	0	0	0.0106095	MES_10
rbms3	2	0.00421053	2	0.00421053	0	0	0	0.029689	MES_10
nppc	9	0.0189474	9	0.0189474	0	0	0	0.113816	MES_10
rxraa	26	0.0547368	0	0	26	0.0547368	0	0.180811	MES_10
pbx1a	10	0.0210526	0	0	10	0.0210526	0	0.0575665	MES_10
crip1	11	0.0231579	11	0.0231579	0	0	0	0.123603	MES_10
zeb1b	4	0.00842105	0	0	4	0.00842105	0	0.0272475	MES_10
stard14	2	0.00421053	2	0.00421053	0	0	0	0.0384476	MES_10
nuggc.3	2	0.00421053	2	0.00421053	0	0	0	0.0736646	MES_10
rorc	5	0.0105263	0	0	5	0.0105263	0	0.022612	MES_10
lmna	3	0.00631579	3	0.00631579	0	0	0	0.0237645	MES_10
tnfaip6	7	0.0147368	7	0.0147368	0	0	0	0.0531239	MES_10
krt18a.1	3	0.00631579	3	0.00631579	0	0	0	0.026952	MES_10
prickle2b	5	0.0105263	5	0.0105263	0	0	0	0.0634224	MES_10
rnf213a	3	0.00631579	3	0.00631579	0	0	0	0.044327	MES_10
sdc4	3	0.00631579	3	0.00631579	0	0	0	0.0512751	MES_10
zgc:193505	9	0.0189474	9	0.0189474	0	0	0	0.0989773	MES_10
f3a	5	0.0105263	5	0.0105263	0	0	0	0.0425418	MES_10
rfx3	3	0.00631579	0	0	3	0.00631579	0	0.0166762	MES_10
nav3	3	0.00631579	3	0.00631579	0	0	0	0.0648144	MES_10
tenm3	2	0.00421053	2	0.00421053	0	0	0	0.0642993	MES_10
si:dkey-1h24.2	4	0.00842105	4	0.00842105	0	0	0	0.0183111	MES_10
rflna	2	0.00421053	2	0.00421053	0	0	0	0.0838919	MES_10
ezrb	4	0.00842105	4	0.00842105	0	0	0	0.0643307	MES_10
aldh1a2	6	0.0126316	6	0.0126316	0	0	0	0.0440365	MES_10
igf2b	5	0.0105263	5	0.0105263	0	0	0	0.0366425	MES_10
stc1	8	0.0168421	8	0.0168421	0	0	0	0.0963317	MES_10
chsy1	10	0.0210526	10	0.0210526	0	0	0	0.0906735	MES_10
socs3a	2	0.00421053	2	0.00421053	0	0	0	0.0154737	MES_10
her6	5	0.0105263	1	0.00210526	4	0.00842105	27	0.0306983	MES_10
nfkbiaa	5	0.0105263	5	0.0105263	0	0	0	0.0353166	MES_10
nkx3-1	6	0.0126316	0	0	6	0.0126316	0	0.0186043	MES_10
hsd17b12a	5	0.0105263	5	0.0105263	0	0	0	0.0563498	MES_10
krt96	1	0.00210526	1	0.00210526	0	0	0	0.0505099	MES_10
rhcgl1	6	0.0126316	6	0.0126316	0	0	0	0.0812675	MES_10
pdlim2	3	0.00631579	3	0.00631579	0	0	0	0.040175	MES_10
fstl1b	4	0.00842105	4	0.00842105	0	0	0	0.0568346	MES_10
macrod2	7	0.0147368	7	0.0147368	0	0	0	0.0693381	MES_10
igsf3	5	0.0105263	5	0.0105263	0	0	0	0.0345459	MES_10
tnfrsf9a	6	0.0126316	6	0.0126316	0	0	0	0.0449348	MES_10
ano1	3	0.00631579	3	0.00631579	0	0	0	0.0430953	MES_10
hip1rb	1	0.00210526	1	0.00210526	0	0	0	0.0146047	MES_10
hlfa	7	0.0147368	0	0	7	0.0147368	0	0.0529166	MES_10
paqr5b	6	0.0126316	6	0.0126316	0	0	0	0.0330596	MES_10
slc43a3b	5	0.0105263	5	0.0105263	0	0	0	0.057144	MES_10
degs2	3	0.00631579	3	0.00631579	0	0	0	0.0346454	MES_10
ier2b	4	0.00842105	4	0.00842105	0	0	0	0.0278962	MES_10
igf2bp2a	2	0.00421053	2	0.00421053	0	0	0	0.0544174	MES_10
c1qtnf5	11	0.0231579	11	0.0231579	0	0	0	0.0420629	MES_10
prdm1a	3	0.00631579	3	0.00631579	0	0	0	0.0203727	MES_10
ogfrl2	2	0.00421053	2	0.00421053	0	0	0	0.0139382	MES_10
plod2	4	0.00842105	4	0.00842105	0	0	0	0.0216318	MES_10
fstl1a	3	0.00631579	3	0.00631579	0	0	0	0.0721103	MES_10
si:ch211-79k12.1	3	0.00631579	3	0.00631579	0	0	0	0.0382907	MES_10
rcn3	10	0.0210526	10	0.0210526	0	0	0	0.0978837	MES_10
htra1b	7	0.0147368	7	0.0147368	0	0	0	0.0730671	MES_10
krt4	5	0.0105263	5	0.0105263	0	0	0	0.0494371	MES_10
mybl1	4	0.00842105	0	0	4	0.00842105	0	0.00475173	MES_10
top2a	3	0.00631579	3	0.00631579	0	0	0	0.00682782	MES_10
klf12b	6	0.0126316	0	0	6	0.0126316	0	0.021049	MES_10
pax7b	7	0.0147368	0	0	7	0.0147368	0	0.0508429	MES_10
actn4	6	0.0126316	6	0.0126316	0	0	0	0.0785627	MES_10
fn1a	11	0.0231579	11	0.0231579	0	0	0	0.109424	MES_10
plxna3	4	0.00842105	4	0.00842105	0	0	0	0.0570116	MES_10
pnp5a	4	0.00842105	4	0.00842105	0	0	0	0.0580316	MES_10
mki67	5	0.0105263	5	0.0105263	0	0	0	0.0152929	MES_10
cntfr	6	0.0126316	6	0.0126316	0	0	0	0.0574653	MES_10
rpl28	2	0.00421053	2	0.00421053	0	0	0	0.0192339	MES_10
enpp1	4	0.00842105	4	0.00842105	0	0	0	0.0170613	MES_10
sulf1	2	0.00421053	2	0.00421053	0	0	0	0.0529585	MES_10
errfi1a	5	0.0105263	5	0.0105263	0	0	0	0.0426691	MES_10
alx4b	15	0.0315789	0	0	15	0.0315789	0	0.0800113	MES_10
agr1	3	0.00631579	3	0.00631579	0	0	0	0.0259038	MES_10
tgm5l	3	0.00631579	3	0.00631579	0	0	0	0.0523971	MES_10
lima1a	5	0.0105263	5	0.0105263	0	0	0	0.0736209	MES_10
spon1b	2	0.00421053	2	0.00421053	0	0	0	0.0464203	MES_10
nfat5b	1	0.00210526	0	0	1	0.00210526	0	0.00663016	MES_10
egr2b	3	0.00631579	0	0	3	0.00631579	0	0.0181497	MES_10
mmp2	5	0.0105263	5	0.0105263	0	0	0	0.0457736	MES_10
furina	3	0.00631579	3	0.00631579	0	0	0	0.0201851	MES_10
heyl	2	0.00421053	0	0	2	0.00421053	0	0.00635137	MES_10
nr1d4b	9	0.0189474	0	0	9	0.0189474	0	0.0783062	MES_10
cxcl8b.1	1	0.00210526	1	0.00210526	0	0	0	0.0265966	MES_10
tjp3	3	0.00631579	3	0.00631579	0	0	0	0.0315363	MES_10
pcna	8	0.0168421	8	0.0168421	0	0	0	0.0691279	MES_10
pdzrn3b	1	0.00210526	1	0.00210526	0	0	0	0.00475314	MES_10
mhc2dab	1	0.00210526	1	0.00210526	0	0	0	0.0128913	MES_10
bmpr1ba	5	0.0105263	5	0.0105263	0	0	0	0.0485588	MES_10
anxa11a	2	0.00421053	2	0.00421053	0	0	0	0.0313608	MES_10
batf	11	0.0231579	0	0	11	0.0231579	0	0.0682911	MES_10
zgc:153911	6	0.0126316	6	0.0126316	0	0	0	0.0899267	MES_10
gfi1b	4	0.00842105	0	0	4	0.00842105	0	0.0427176	MES_10
lum	3	0.00631579	3	0.00631579	0	0	0	0.0251565	MES_10
lpar1	2	0.00421053	2	0.00421053	0	0	0	0.0365102	MES_10
rps6ka3b	2	0.00421053	2	0.00421053	0	0	0	0.0578874	MES_10
baiap2l1a	4	0.00842105	4	0.00842105	0	0	0	0.0503551	MES_10
ptgdsb.1	3	0.00631579	3	0.00631579	0	0	0	0.0393617	MES_10
inhbaa	4	0.00842105	4	0.00842105	0	0	0	0.0301707	MES_10
pbx3b	6	0.0126316	0	0	6	0.0126316	0	0.0363312	MES_10
zcchc24	3	0.00631579	3	0.00631579	0	0	0	0.0125776	MES_10
f3b	6	0.0126316	6	0.0126316	0	0	0	0.0856916	MES_10
igfbp1a	5	0.0105263	5	0.0105263	0	0	0	0.065322	MES_10
osbpl3a	3	0.00631579	3	0.00631579	0	0	0	0.0491317	MES_10
vasnb	3	0.00631579	3	0.00631579	0	0	0	0.0182605	MES_10
pappaa	3	0.00631579	3	0.00631579	0	0	0	0.0146898	MES_10
arid3a	4	0.00842105	0	0	4	0.00842105	0	0.0121476	MES_10
col11a1b	1	0.00210526	1	0.00210526	0	0	0	0.0381818	MES_10
pfn1	4	0.00842105	4	0.00842105	0	0	0	0.0656569	MES_10
f13a1b	4	0.00842105	4	0.00842105	0	0	0	0.0159886	MES_10
tnfrsf18	1	0.00210526	1	0.00210526	0	0	0	0.0121654	MES_10
lfng	2	0.00421053	2	0.00421053	0	0	0	0.0113334	MES_10
crip2	1	0.00210526	1	0.00210526	0	0	0	0.00446334	MES_10
cpne5b	1	0.00210526	1	0.00210526	0	0	0	0.00365703	MES_10
ctnnal1	1	0.00210526	1	0.00210526	0	0	0	0.0117806	MES_10
fibinb	2	0.00421053	2	0.00421053	0	0	0	0.00963994	MES_10
col1a1a	4	0.00842105	4	0.00842105	0	0	0	0.021328	MES_10
slit2	2	0.00421053	2	0.00421053	0	0	0	0.0213748	MES_10
diaph3	6	0.0126316	6	0.0126316	0	0	0	0.0325132	MES_10
tlx2	5	0.0105263	0	0	5	0.0105263	0	0.0415738	MES_10
elmo1	1	0.00210526	1	0.00210526	0	0	0	0.00747818	MES_10
cyp26b1	2	0.00421053	2	0.00421053	0	0	0	0.0156528	MES_10
furinb	5	0.0105263	5	0.0105263	0	0	0	0.0557134	MES_10
gli2b	8	0.0168421	2	0.00421053	6	0.0126316	38	0.0537938	MES_10
dachd	1	0.00210526	1	0.00210526	0	0	0	0.00211573	MES_10
scinla	1	0.00210526	1	0.00210526	0	0	0	0.0139941	MES_10
zgc:152791	2	0.00421053	2	0.00421053	0	0	0	0.011148	MES_10
rtn4r	1	0.00210526	1	0.00210526	0	0	0	0.00266585	MES_10
alx4a	8	0.0168421	0	0	8	0.0168421	0	0.0292063	MES_10
dachc	6	0.0126316	6	0.0126316	0	0	0	0.0399426	MES_10
aebp1	3	0.00631579	3	0.00631579	0	0	0	0.014447	MES_10
creb3l3b	1	0.00210526	0	0	1	0.00210526	0	0.0034475	MES_10
kpna2	1	0.00210526	1	0.00210526	0	0	0	0.00791571	MES_10
matn4	1	0.00210526	1	0.00210526	0	0	0	0.00226396	MES_10
gpc5a	1	0.00210526	1	0.00210526	0	0	0	0.002262	MES_10
bcar1	3	0.00631579	3	0.00631579	0	0	0	0.0483504	MES_10
hsp70l	1	0.00210526	1	0.00210526	0	0	0	0.00642702	MES_10
enah	2	0.00421053	2	0.00421053	0	0	0	0.0187118	MES_10
unc5b	2	0.00421053	2	0.00421053	0	0	0	0.0469722	MES_10
nr2f2	1	0.00210526	0	0	1	0.00210526	0	0.00260762	MES_10
tent5bb	2	0.00421053	2	0.00421053	0	0	0	0.028548	MES_10
mgst1.2	2	0.00421053	2	0.00421053	0	0	0	0.0225197	MES_10
postnb	7	0.0147368	7	0.0147368	0	0	0	0.081909	MES_10
trim16	1	0.00210526	1	0.00210526	0	0	0	0.0201727	MES_10
col5a2a	3	0.00631579	3	0.00631579	0	0	0	0.0328075	MES_10
vipr1b	1	0.00210526	1	0.00210526	0	0	0	0.0373031	MES_10
bhmt	2	0.00421053	2	0.00421053	0	0	0	0.0395396	MES_10
adgra2	2	0.00421053	2	0.00421053	0	0	0	0.00860882	MES_10
slco3a1	4	0.00842105	4	0.00842105	0	0	0	0.0230303	MES_10
lamb1a	1	0.00210526	1	0.00210526	0	0	0	0.00914981	MES_10
ckba	1	0.00210526	1	0.00210526	0	0	0	0.0116092	MES_10
bcl2a	1	0.00210526	1	0.00210526	0	0	0	0.0332927	MES_10
ctss2.2	1	0.00210526	1	0.00210526	0	0	0	0.00675135	MES_10
mmp30	1	0.00210526	1	0.00210526	0	0	0	0.0128437	MES_10
crlf1a	1	0.00210526	1	0.00210526	0	0	0	0.00466566	MES_10
ftr83	1	0.00210526	1	0.00210526	0	0	0	0.0106044	MES_10
afap1l1a	2	0.00421053	2	0.00421053	0	0	0	0.00498868	MES_10
fgfrl1a	2	0.00421053	2	0.00421053	0	0	0	0.00834278	MES_10
gfra4a	1	0.00210526	1	0.00210526	0	0	0	0.0172535	MES_10
adma	1	0.00210526	1	0.00210526	0	0	0	0.00594967	MES_10
rps23	3	0.00631579	3	0.00631579	0	0	0	0.0162254	MES_10
dlg2	1	0.00210526	1	0.00210526	0	0	0	0.0100953	MES_10
col27a1b	3	0.00631579	3	0.00631579	0	0	0	0.0739403	MES_10
map3k22	1	0.00210526	1	0.00210526	0	0	0	0.0222452	MES_10
s1pr2	3	0.00631579	3	0.00631579	0	0	0	0.0336769	MES_10
rplp2l	2	0.00421053	2	0.00421053	0	0	0	0.0282738	MES_10
elovl6l	1	0.00210526	1	0.00210526	0	0	0	0.0102105	MES_10
crim1	5	0.0105263	5	0.0105263	0	0	0	0.0306388	MES_10
btbd11a	1	0.00210526	1	0.00210526	0	0	0	0.0220282	MES_10
rpl18a	2	0.00421053	2	0.00421053	0	0	0	0.0114658	MES_10
bnc2	2	0.00421053	2	0.00421053	0	0	0	0.0114268	MES_10
abi3bpb	4	0.00842105	4	0.00842105	0	0	0	0.0651283	MES_10
ddc	1	0.00210526	1	0.00210526	0	0	0	0.0178716	MES_10
csf1ra	2	0.00421053	2	0.00421053	0	0	0	0.00485352	MES_10
slc4a11	2	0.00421053	2	0.00421053	0	0	0	0.0352443	MES_10
inhbab	4	0.00842105	4	0.00842105	0	0	0	0.0274294	MES_10
tnk1	1	0.00210526	1	0.00210526	0	0	0	0.012757	MES_10
adgrg6	1	0.00210526	1	0.00210526	0	0	0	0.0063433	MES_10
tfeb	1	0.00210526	0	0	1	0.00210526	0	0.00338324	MES_10
pdlim7	3	0.00631579	3	0.00631579	0	0	0	0.0421919	MES_10
mmp9	1	0.00210526	1	0.00210526	0	0	0	0.0304909	MES_10
cav1	2	0.00421053	2	0.00421053	0	0	0	0.0159563	MES_10
ripor2	3	0.00631579	3	0.00631579	0	0	0	0.0380248	MES_10
mitfa	1	0.00210526	0	0	1	0.00210526	0	0.00480972	MES_10
aste1a	2	0.00421053	2	0.00421053	0	0	0	0.024248	MES_10
nedd9	2	0.00421053	2	0.00421053	0	0	0	0.0128057	MES_10
snap25b	1	0.00210526	1	0.00210526	0	0	0	0.00437827	MES_10
nkain4	1	0.00210526	1	0.00210526	0	0	0	0.0328367	MES_10
myoc	2	0.00421053	2	0.00421053	0	0	0	0.0134588	MES_10
cenpe	1	0.00210526	1	0.00210526	0	0	0	0.00665344	MES_10
pcdh15b	2	0.00421053	2	0.00421053	0	0	0	0.0110693	MES_10
rplp0	1	0.00210526	1	0.00210526	0	0	0	0.000990114	MES_10
mitfb	1	0.00210526	0	0	1	0.00210526	0	0.0292915	MES_10
tmprss13b	1	0.00210526	1	0.00210526	0	0	0	0.000598517	MES_10
efemp2b	1	0.00210526	1	0.00210526	0	0	0	0.00417493	MES_10
hsd11b2	1	0.00210526	1	0.00210526	0	0	0	0.00380172	MES_10
fam107b	1	0.00210526	1	0.00210526	0	0	0	0.00603435	MES_10
tspan35	2	0.00421053	2	0.00421053	0	0	0	0.0204938	MES_10
asip2b	1	0.00210526	1	0.00210526	0	0	0	0.0289916	MES_10
zgc:91944	2	0.00421053	0	0	2	0.00421053	0	0.00699959	MES_10
notch1a	1	0.00210526	1	0.00210526	0	0	0	0.00349042	MES_10
cxcl12a	2	0.00421053	2	0.00421053	0	0	0	0.0132621	MES_10
si:dkey-221j11.3	1	0.00210526	1	0.00210526	0	0	0	0.00591123	MES_10
tinagl1	1	0.00210526	1	0.00210526	0	0	0	0.031456	MES_10
emilin1b	2	0.00421053	2	0.00421053	0	0	0	0.0111215	MES_10
ephb2b	2	0.00421053	2	0.00421053	0	0	0	0.00296527	MES_10
ccl19a.2	1	0.00210526	1	0.00210526	0	0	0	0.00930567	MES_10
plekhf1	1	0.00210526	1	0.00210526	0	0	0	0.00927679	MES_10
pvrl2l	2	0.00421053	2	0.00421053	0	0	0	0.0248443	MES_10
cacna1c	1	0.00210526	1	0.00210526	0	0	0	0.00707307	MES_10
mhc2b	1	0.00210526	1	0.00210526	0	0	0	0.00920598	MES_10
histh1l	1	0.00210526	1	0.00210526	0	0	0	0.00500735	MES_10
icn	2	0.00421053	2	0.00421053	0	0	0	0.00714839	MES_10
ndrg1a	1	0.00210526	1	0.00210526	0	0	0	0.0115015	MES_10
dab2ipb	1	0.00210526	1	0.00210526	0	0	0	0.0274195	MES_10
sema3e	1	0.00210526	1	0.00210526	0	0	0	0.00176582	MES_10
ccnd2a	2	0.00421053	2	0.00421053	0	0	0	0.0147692	MES_10
ngfa	1	0.00210526	1	0.00210526	0	0	0	0.0157224	MES_10
hey2	1	0.00210526	0	0	1	0.00210526	0	0.00131384	MES_10
lhfpl6	1	0.00210526	1	0.00210526	0	0	0	0.00556455	MES_10
chst11	1	0.00210526	1	0.00210526	0	0	0	0.0159048	MES_10
il6st	1	0.00210526	1	0.00210526	0	0	0	0.00523612	MES_10
vegfd	1	0.00210526	1	0.00210526	0	0	0	0.00260016	MES_10
ebf1b	1	0.00210526	0	0	1	0.00210526	0	0.00335182	MES_10
lrrc4ca	1	0.00210526	1	0.00210526	0	0	0	0.000833354	MES_10
hsp90aa1.2	1	0.00210526	1	0.00210526	0	0	0	0.00399541	MES_10
csf1a	1	0.00210526	1	0.00210526	0	0	0	0.00112172	MES_10
zbtb16a	1	0.00210526	1	0.00210526	0	0	0	0.0148863	MES_10
plek2	1	0.00210526	1	0.00210526	0	0	0	0.0106681	MES_10
rxfp2a	1	0.00210526	1	0.00210526	0	0	0	0.00165923	MES_10
fgfr1b	1	0.00210526	1	0.00210526	0	0	0	0.00446325	MES_10
si:dkey-172h23.2	1	0.00210526	1	0.00210526	0	0	0	0.00375113	MES_10
fat3a	1	0.00210526	1	0.00210526	0	0	0	0.0100361	MES_10
fgf10a	1	0.00210526	1	0.00210526	0	0	0	0.00252445	MES_10
pdlim4	1	0.00210526	1	0.00210526	0	0	0	0.0105668	MES_10
rpl7a	1	0.00210526	1	0.00210526	0	0	0	0.0105174	MES_10
runx2a	27	0.0520231	1	0.00192678	26	0.0500963	23	0.194677	MES_11
ogna	6	0.0115607	6	0.0115607	0	0	0	0.111066	MES_11
pknox2	78	0.150289	4	0.00770713	74	0.142582	728	0.823269	MES_11
cdh1	14	0.026975	14	0.026975	0	0	0	0.365385	MES_11
tp63	39	0.0751445	21	0.0404624	18	0.0346821	2562	0.594182	MES_11
cldna	13	0.0250482	13	0.0250482	0	0	0	0.275775	MES_11
foxp4	80	0.154143	5	0.00963391	75	0.144509	3565	1	MES_11
frem2b	11	0.0211946	11	0.0211946	0	0	0	0.311102	MES_11
baiap2a	12	0.0231214	12	0.0231214	0	0	0	0.313879	MES_11
and2	7	0.0134875	7	0.0134875	0	0	0	0.213223	MES_11
plch2a	10	0.0192678	10	0.0192678	0	0	0	0.230774	MES_11
frem2a	15	0.0289017	15	0.0289017	0	0	0	0.416169	MES_11
apoeb	13	0.0250482	13	0.0250482	0	0	0	0.351468	MES_11
sox6	84	0.16185	6	0.0115607	78	0.150289	773	0.572902	MES_11
robo3	14	0.026975	14	0.026975	0	0	0	0.227	MES_11
myh9a	9	0.017341	9	0.017341	0	0	0	0.292085	MES_11
klf8	51	0.0982659	1	0.00192678	50	0.0963391	37	0.300437	MES_11
perp	11	0.0211946	11	0.0211946	0	0	0	0.168247	MES_11
thy1	3	0.00578035	3	0.00578035	0	0	0	0.196919	MES_11
grhl2a	46	0.088632	8	0.0154143	38	0.0732177	1323	0.321382	MES_11
tmem176l.4	6	0.0115607	6	0.0115607	0	0	0	0.137587	MES_11
scel	6	0.0115607	6	0.0115607	0	0	0	0.119823	MES_11
aqp3a	10	0.0192678	10	0.0192678	0	0	0	0.207502	MES_11
fn1b	13	0.0250482	13	0.0250482	0	0	0	0.23843	MES_11
rfx2	29	0.0558767	0	0	29	0.0558767	0	0.326313	MES_11
itga6b	8	0.0154143	8	0.0154143	0	0	0	0.155525	MES_11
jag1a	4	0.00770713	4	0.00770713	0	0	0	0.160409	MES_11
alpi.1	14	0.026975	14	0.026975	0	0	0	0.365375	MES_11
nfixb	28	0.0539499	0	0	28	0.0539499	0	0.239534	MES_11
krt94	14	0.026975	14	0.026975	0	0	0	0.25418	MES_11
runx2b	14	0.026975	0	0	14	0.026975	0	0.0868838	MES_11
daam1b	11	0.0211946	11	0.0211946	0	0	0	0.0757595	MES_11
ppl	6	0.0115607	6	0.0115607	0	0	0	0.0781962	MES_11
meox2a	37	0.0712909	0	0	37	0.0712909	0	0.323529	MES_11
tbx2a	9	0.017341	0	0	9	0.017341	0	0.158453	MES_11
fosl1a	48	0.0924855	5	0.00963391	43	0.0828516	643	0.374096	MES_11
phlda2	11	0.0211946	11	0.0211946	0	0	0	0.178966	MES_11
trps1	15	0.0289017	4	0.00770713	11	0.0211946	684	0.157923	MES_11
krt97	4	0.00770713	4	0.00770713	0	0	0	0.209546	MES_11
nr4a1	30	0.0578035	0	0	30	0.0578035	0	0.251534	MES_11
itgb4	14	0.026975	14	0.026975	0	0	0	0.235323	MES_11
tnika	10	0.0192678	10	0.0192678	0	0	0	0.142755	MES_11
twist2	32	0.061657	1	0.00192678	31	0.0597303	88	0.164357	MES_11
si:dkey-1h24.2	6	0.0115607	6	0.0115607	0	0	0	0.0643225	MES_11
tcf7l1b	27	0.0520231	2	0.00385356	25	0.0481696	46	0.152318	MES_11
vcana	15	0.0289017	15	0.0289017	0	0	0	0.125002	MES_11
fosab	46	0.088632	5	0.00963391	41	0.0789981	1576	0.34795	MES_11
pdgfrb	5	0.00963391	5	0.00963391	0	0	0	0.0826892	MES_11
bach2b	23	0.044316	0	0	23	0.044316	0	0.169587	MES_11
cygb1	10	0.0192678	10	0.0192678	0	0	0	0.0475161	MES_11
dlx4a	45	0.0867052	0	0	45	0.0867052	0	0.352272	MES_11
tgfbi	8	0.0154143	8	0.0154143	0	0	0	0.168436	MES_11
epha7	5	0.00963391	5	0.00963391	0	0	0	0.160763	MES_11
myo5b	7	0.0134875	7	0.0134875	0	0	0	0.0760742	MES_11
nectin1b	6	0.0115607	6	0.0115607	0	0	0	0.209978	MES_11
adgrg6	3	0.00578035	3	0.00578035	0	0	0	0.0850619	MES_11
sema3e	11	0.0211946	11	0.0211946	0	0	0	0.125589	MES_11
elf3	51	0.0982659	0	0	51	0.0982659	0	0.255722	MES_11
fa2h	4	0.00770713	4	0.00770713	0	0	0	0.0487009	MES_11
nr1d2a	29	0.0558767	0	0	29	0.0558767	0	0.289027	MES_11
ecrg4a	16	0.0308285	16	0.0308285	0	0	0	0.209746	MES_11
znf185	4	0.00770713	4	0.00770713	0	0	0	0.0746975	MES_11
col18a1a	6	0.0115607	6	0.0115607	0	0	0	0.127794	MES_11
tfpia	6	0.0115607	6	0.0115607	0	0	0	0.206485	MES_11
zgc:153665	14	0.026975	14	0.026975	0	0	0	0.213223	MES_11
ches1	36	0.0693642	0	0	36	0.0693642	0	0.214622	MES_11
foxp1b	55	0.105973	0	0	55	0.105973	0	0.440837	MES_11
gli2a	9	0.017341	2	0.00385356	7	0.0134875	13	0.0704937	MES_11
foxo1b	26	0.0500963	0	0	26	0.0500963	0	0.088108	MES_11
lmo7a	9	0.017341	9	0.017341	0	0	0	0.115078	MES_11
cldnb	10	0.0192678	10	0.0192678	0	0	0	0.137512	MES_11
runx3	16	0.0308285	0	0	16	0.0308285	0	0.102941	MES_11
krt91	14	0.026975	14	0.026975	0	0	0	0.120645	MES_11
ebf3a	15	0.0289017	0	0	15	0.0289017	0	0.139839	MES_11
tgfbr3	2	0.00385356	2	0.00385356	0	0	0	0.0154809	MES_11
jun	34	0.0655106	6	0.0115607	28	0.0539499	959	0.30191	MES_11
tcf7l2	27	0.0520231	0	0	27	0.0520231	0	0.151506	MES_11
frem3	15	0.0289017	15	0.0289017	0	0	0	0.256416	MES_11
nr4a3	34	0.0655106	0	0	34	0.0655106	0	0.277072	MES_11
adam8a	11	0.0211946	11	0.0211946	0	0	0	0.161702	MES_11
arid3c	11	0.0211946	5	0.00963391	6	0.0115607	28	0.058881	MES_11
itga9	7	0.0134875	7	0.0134875	0	0	0	0.115409	MES_11
pmp22b	3	0.00578035	3	0.00578035	0	0	0	0.0753758	MES_11
raraa	26	0.0500963	0	0	26	0.0500963	0	0.203611	MES_11
enam	15	0.0289017	15	0.0289017	0	0	0	0.188665	MES_11
junba	40	0.0770713	0	0	40	0.0770713	0	0.325295	MES_11
si:ch211-157c3.4	6	0.0115607	6	0.0115607	0	0	0	0.124088	MES_11
thbs4b	14	0.026975	14	0.026975	0	0	0	0.128668	MES_11
mef2cb	20	0.0385356	0	0	20	0.0385356	0	0.172458	MES_11
col10a1a	6	0.0115607	6	0.0115607	0	0	0	0.0782388	MES_11
enpp1	5	0.00963391	5	0.00963391	0	0	0	0.0787398	MES_11
cacna1ba	8	0.0154143	8	0.0154143	0	0	0	0.185918	MES_11
dkk3b	9	0.017341	9	0.017341	0	0	0	0.0966156	MES_11
elmo1	4	0.00770713	4	0.00770713	0	0	0	0.0772849	MES_11
atf3	36	0.0693642	0	0	36	0.0693642	0	0.299268	MES_11
htra1a	3	0.00578035	3	0.00578035	0	0	0	0.0228039	MES_11
cast	6	0.0115607	6	0.0115607	0	0	0	0.084327	MES_11
im:7142702	3	0.00578035	0	0	3	0.00578035	0	0.0288605	MES_11
ptprub	11	0.0211946	11	0.0211946	0	0	0	0.204489	MES_11
prdm1a	4	0.00770713	4	0.00770713	0	0	0	0.0450698	MES_11
eppk1	12	0.0231214	12	0.0231214	0	0	0	0.195437	MES_11
klf12a	17	0.0327553	0	0	17	0.0327553	0	0.125284	MES_11
nppc	10	0.0192678	10	0.0192678	0	0	0	0.172706	MES_11
cldne	9	0.017341	9	0.017341	0	0	0	0.0881166	MES_11
cux1a	22	0.0423892	0	0	22	0.0423892	0	0.123268	MES_11
slc38a3a	8	0.0154143	8	0.0154143	0	0	0	0.163142	MES_11
lima1a	8	0.0154143	8	0.0154143	0	0	0	0.144817	MES_11
prss35	9	0.017341	9	0.017341	0	0	0	0.241578	MES_11
klf6a	25	0.0481696	5	0.00963391	20	0.0385356	826	0.168211	MES_11
tph1b	5	0.00963391	5	0.00963391	0	0	0	0.0297009	MES_11
col11a1a	13	0.0250482	13	0.0250482	0	0	0	0.171937	MES_11
macc1	8	0.0154143	8	0.0154143	0	0	0	0.0988926	MES_11
ptprfa	4	0.00770713	4	0.00770713	0	0	0	0.112211	MES_11
egr1	44	0.0847784	0	0	44	0.0847784	0	0.176287	MES_11
nfic	21	0.0404624	0	0	21	0.0404624	0	0.212141	MES_11
itga5	7	0.0134875	7	0.0134875	0	0	0	0.100834	MES_11
mafk	24	0.0462428	0	0	24	0.0462428	0	0.155648	MES_11
rxraa	28	0.0539499	0	0	28	0.0539499	0	0.243979	MES_11
twist1a	26	0.0500963	3	0.00578035	23	0.044316	378	0.125561	MES_11
hmgn2	6	0.0115607	6	0.0115607	0	0	0	0.06319	MES_11
arid5b	5	0.00963391	0	0	5	0.00963391	0	0.0113137	MES_11
wnt5b	9	0.017341	9	0.017341	0	0	0	0.150754	MES_11
c1qtnf5	12	0.0231214	12	0.0231214	0	0	0	0.0650714	MES_11
plxna3	4	0.00770713	4	0.00770713	0	0	0	0.0608809	MES_11
lef1	13	0.0250482	1	0.00192678	12	0.0231214	65	0.104624	MES_11
notch3	6	0.0115607	6	0.0115607	0	0	0	0.146902	MES_11
foxo1a	40	0.0770713	0	0	40	0.0770713	0	0.182485	MES_11
lepb	8	0.0154143	8	0.0154143	0	0	0	0.116499	MES_11
fosb	14	0.026975	0	0	14	0.026975	0	0.101545	MES_11
dacha	15	0.0289017	15	0.0289017	0	0	0	0.173387	MES_11
tnks1bp1	3	0.00578035	3	0.00578035	0	0	0	0.0406181	MES_11
nfixa	15	0.0289017	0	0	15	0.0289017	0	0.156441	MES_11
jdp2b	35	0.0674374	3	0.00578035	32	0.061657	1806	0.264917	MES_11
zgc:111983	8	0.0154143	8	0.0154143	0	0	0	0.137919	MES_11
foxo3b	15	0.0289017	1	0.00192678	14	0.026975	37	0.0834036	MES_11
glis1a	2	0.00385356	0	0	2	0.00385356	0	0.0188094	MES_11
cldni	21	0.0404624	21	0.0404624	0	0	0	0.249266	MES_11
col1a2	14	0.026975	14	0.026975	0	0	0	0.220943	MES_11
dsc2l	9	0.017341	9	0.017341	0	0	0	0.11799	MES_11
gpc1b	3	0.00578035	3	0.00578035	0	0	0	0.0227033	MES_11
ar	11	0.0211946	0	0	11	0.0211946	0	0.0465327	MES_11
rhpn2	2	0.00385356	2	0.00385356	0	0	0	0.0382879	MES_11
klhl4	2	0.00385356	2	0.00385356	0	0	0	0.0210131	MES_11
fibinb	5	0.00963391	5	0.00963391	0	0	0	0.0434918	MES_11
malb	6	0.0115607	6	0.0115607	0	0	0	0.101778	MES_11
creb3l3b	6	0.0115607	0	0	6	0.0115607	0	0.0428347	MES_11
tnfaip6	7	0.0134875	7	0.0134875	0	0	0	0.0935344	MES_11
slit3	4	0.00770713	4	0.00770713	0	0	0	0.117836	MES_11
mdka	8	0.0154143	8	0.0154143	0	0	0	0.104736	MES_11
ugt8	6	0.0115607	6	0.0115607	0	0	0	0.0793569	MES_11
ogfrl2	2	0.00385356	2	0.00385356	0	0	0	0.0150595	MES_11
creb5b	19	0.0366089	0	0	19	0.0366089	0	0.0563966	MES_11
serpine1	9	0.017341	9	0.017341	0	0	0	0.0882631	MES_11
ca10a	4	0.00770713	4	0.00770713	0	0	0	0.0944673	MES_11
stat3	17	0.0327553	3	0.00578035	14	0.026975	383	0.114472	MES_11
and1	13	0.0250482	13	0.0250482	0	0	0	0.163807	MES_11
pkp3a	12	0.0231214	12	0.0231214	0	0	0	0.199375	MES_11
crlf1a	4	0.00770713	4	0.00770713	0	0	0	0.0676873	MES_11
krt93	10	0.0192678	10	0.0192678	0	0	0	0.182572	MES_11
ptgs2a	4	0.00770713	4	0.00770713	0	0	0	0.0512504	MES_11
dhrs13a.2	2	0.00385356	2	0.00385356	0	0	0	0.0235465	MES_11
lama5	20	0.0385356	20	0.0385356	0	0	0	0.247312	MES_11
klf7a	13	0.0250482	0	0	13	0.0250482	0	0.0935656	MES_11
si:busm1-57f23.1	11	0.0211946	11	0.0211946	0	0	0	0.172549	MES_11
nrxn2a	7	0.0134875	7	0.0134875	0	0	0	0.0753182	MES_11
pawr	4	0.00770713	4	0.00770713	0	0	0	0.105575	MES_11
f3b	9	0.017341	9	0.017341	0	0	0	0.136607	MES_11
dpt	5	0.00963391	5	0.00963391	0	0	0	0.0376048	MES_11
sox9a	38	0.0732177	0	0	38	0.0732177	0	0.250911	MES_11
zgc:193505	9	0.017341	9	0.017341	0	0	0	0.121547	MES_11
her6	8	0.0154143	1	0.00192678	7	0.0134875	23	0.0386038	MES_11
rps27l	2	0.00385356	2	0.00385356	0	0	0	0.0198552	MES_11
col1a1b	17	0.0327553	17	0.0327553	0	0	0	0.194284	MES_11
plcd1a	5	0.00963391	5	0.00963391	0	0	0	0.0512704	MES_11
timp2b	6	0.0115607	6	0.0115607	0	0	0	0.102704	MES_11
cldn7b	5	0.00963391	5	0.00963391	0	0	0	0.127682	MES_11
col4a5	5	0.00963391	5	0.00963391	0	0	0	0.101466	MES_11
cxcl14	5	0.00963391	5	0.00963391	0	0	0	0.0678204	MES_11
cntfr	8	0.0154143	8	0.0154143	0	0	0	0.113447	MES_11
f5	6	0.0115607	6	0.0115607	0	0	0	0.137019	MES_11
rorc	2	0.00385356	0	0	2	0.00385356	0	0.0222351	MES_11
ccn1	8	0.0154143	8	0.0154143	0	0	0	0.105744	MES_11
runx1	16	0.0308285	0	0	16	0.0308285	0	0.083967	MES_11
bhlhe40	19	0.0366089	0	0	19	0.0366089	0	0.105047	MES_11
dusp5	3	0.00578035	3	0.00578035	0	0	0	0.0438558	MES_11
lfng	3	0.00578035	3	0.00578035	0	0	0	0.0543766	MES_11
tspan18b	9	0.017341	9	0.017341	0	0	0	0.102409	MES_11
sparc	9	0.017341	9	0.017341	0	0	0	0.13826	MES_11
agr1	2	0.00385356	2	0.00385356	0	0	0	0.00942466	MES_11
dmrt1	16	0.0308285	1	0.00192678	15	0.0289017	14	0.0909619	MES_11
hmga2	23	0.044316	4	0.00770713	19	0.0366089	496	0.164641	MES_11
adamts3	5	0.00963391	5	0.00963391	0	0	0	0.0780898	MES_11
jupa	5	0.00963391	5	0.00963391	0	0	0	0.112819	MES_11
si:dkey-193p11.2	8	0.0154143	8	0.0154143	0	0	0	0.100963	MES_11
fstl1b	7	0.0134875	7	0.0134875	0	0	0	0.0612595	MES_11
thbs3a	6	0.0115607	6	0.0115607	0	0	0	0.0531441	MES_11
tgfb2	1	0.00192678	1	0.00192678	0	0	0	0.0387131	MES_11
abi3bpb	18	0.0346821	18	0.0346821	0	0	0	0.243165	MES_11
klf15	9	0.017341	0	0	9	0.017341	0	0.0590627	MES_11
bcam	20	0.0385356	20	0.0385356	0	0	0	0.199333	MES_11
nbn	1	0.00192678	1	0.00192678	0	0	0	0.0667926	MES_11
nrg1	3	0.00578035	3	0.00578035	0	0	0	0.0458555	MES_11
igfbp5b	6	0.0115607	6	0.0115607	0	0	0	0.104265	MES_11
ptprfb	13	0.0250482	13	0.0250482	0	0	0	0.200931	MES_11
chsy1	9	0.017341	9	0.017341	0	0	0	0.0993125	MES_11
lmx1ba	33	0.0635838	0	0	33	0.0635838	0	0.152265	MES_11
paqr5b	13	0.0250482	13	0.0250482	0	0	0	0.109982	MES_11
nr3c2	11	0.0211946	0	0	11	0.0211946	0	0.0570997	MES_11
sema4ba	11	0.0211946	11	0.0211946	0	0	0	0.185353	MES_11
sema6e	4	0.00770713	4	0.00770713	0	0	0	0.0795742	MES_11
krt15	12	0.0231214	12	0.0231214	0	0	0	0.126006	MES_11
nfatc1	26	0.0500963	2	0.00385356	24	0.0462428	446	0.133924	MES_11
kcnma1a	2	0.00385356	2	0.00385356	0	0	0	0.0755054	MES_11
krt5	4	0.00770713	4	0.00770713	0	0	0	0.0524109	MES_11
stard14	2	0.00385356	2	0.00385356	0	0	0	0.0284302	MES_11
zeb1b	10	0.0192678	0	0	10	0.0192678	0	0.022534	MES_11
lnx1	5	0.00963391	5	0.00963391	0	0	0	0.0335803	MES_11
rbms3	9	0.017341	9	0.017341	0	0	0	0.100304	MES_11
klf2a	11	0.0211946	0	0	11	0.0211946	0	0.0783358	MES_11
b2ml	3	0.00578035	3	0.00578035	0	0	0	0.04841	MES_11
afap1l1a	3	0.00578035	3	0.00578035	0	0	0	0.0516491	MES_11
sfrp1b	6	0.0115607	6	0.0115607	0	0	0	0.0945804	MES_11
npr1a	5	0.00963391	5	0.00963391	0	0	0	0.0559849	MES_11
epcam	13	0.0250482	13	0.0250482	0	0	0	0.179886	MES_11
robo1	9	0.017341	9	0.017341	0	0	0	0.14749	MES_11
gmds	3	0.00578035	3	0.00578035	0	0	0	0.0458549	MES_11
fn1a	10	0.0192678	10	0.0192678	0	0	0	0.116935	MES_11
spon1b	4	0.00770713	4	0.00770713	0	0	0	0.056517	MES_11
mybl1	6	0.0115607	0	0	6	0.0115607	0	0.017112	MES_11
spns2	3	0.00578035	3	0.00578035	0	0	0	0.05454	MES_11
slc51a	1	0.00192678	1	0.00192678	0	0	0	0.00956657	MES_11
rflna	2	0.00385356	2	0.00385356	0	0	0	0.0789584	MES_11
stat5a	3	0.00578035	0	0	3	0.00578035	0	0.036684	MES_11
nt5e	6	0.0115607	6	0.0115607	0	0	0	0.100872	MES_11
igsf3	6	0.0115607	6	0.0115607	0	0	0	0.0335145	MES_11
disp1	2	0.00385356	2	0.00385356	0	0	0	0.0372002	MES_11
serpinb1l4	8	0.0154143	8	0.0154143	0	0	0	0.111279	MES_11
igfbp1a	4	0.00770713	4	0.00770713	0	0	0	0.0791978	MES_11
ppap2d	3	0.00578035	3	0.00578035	0	0	0	0.0453511	MES_11
dlx6a	9	0.017341	0	0	9	0.017341	0	0.0633997	MES_11
aopep	4	0.00770713	4	0.00770713	0	0	0	0.0235113	MES_11
col11a1b	3	0.00578035	3	0.00578035	0	0	0	0.0557084	MES_11
evpla	10	0.0192678	10	0.0192678	0	0	0	0.153195	MES_11
cd74b	6	0.0115607	6	0.0115607	0	0	0	0.0626241	MES_11
bmp4	2	0.00385356	2	0.00385356	0	0	0	0.0413249	MES_11
stc1	6	0.0115607	6	0.0115607	0	0	0	0.0921012	MES_11
hipk2	2	0.00385356	2	0.00385356	0	0	0	0.038808	MES_11
pcdh7b	3	0.00578035	3	0.00578035	0	0	0	0.0509195	MES_11
postnb	5	0.00963391	5	0.00963391	0	0	0	0.0467899	MES_11
gse1	2	0.00385356	2	0.00385356	0	0	0	0.0220372	MES_11
rarab	5	0.00963391	0	0	5	0.00963391	0	0.020497	MES_11
kremen1	5	0.00963391	5	0.00963391	0	0	0	0.0368669	MES_11
tgm5l	2	0.00385356	2	0.00385356	0	0	0	0.0279368	MES_11
ezra	2	0.00385356	2	0.00385356	0	0	0	0.0344109	MES_11
angptl2b	4	0.00770713	4	0.00770713	0	0	0	0.0428884	MES_11
sdc4	5	0.00963391	5	0.00963391	0	0	0	0.0469343	MES_11
thrab	25	0.0481696	0	0	25	0.0481696	0	0.121917	MES_11
plce1	2	0.00385356	2	0.00385356	0	0	0	0.0386202	MES_11
arhgef1b	6	0.0115607	6	0.0115607	0	0	0	0.0528387	MES_11
ezrb	2	0.00385356	2	0.00385356	0	0	0	0.025466	MES_11
bcar1	3	0.00578035	3	0.00578035	0	0	0	0.0533645	MES_11
cx43	2	0.00385356	2	0.00385356	0	0	0	0.0368425	MES_11
nfia	10	0.0192678	0	0	10	0.0192678	0	0.0632603	MES_11
heyl	3	0.00578035	0	0	3	0.00578035	0	0.0130606	MES_11
mhc1zba	5	0.00963391	5	0.00963391	0	0	0	0.0553478	MES_11
adcy2b	4	0.00770713	4	0.00770713	0	0	0	0.0303462	MES_11
pbx1a	13	0.0250482	0	0	13	0.0250482	0	0.0717116	MES_11
hip1rb	1	0.00192678	1	0.00192678	0	0	0	0.0145156	MES_11
rps24	2	0.00385356	2	0.00385356	0	0	0	0.0202853	MES_11
crip1	7	0.0134875	7	0.0134875	0	0	0	0.0974795	MES_11
cd74a	4	0.00770713	4	0.00770713	0	0	0	0.0423626	MES_11
cobll1b	3	0.00578035	3	0.00578035	0	0	0	0.0260916	MES_11
nuggc.3	1	0.00192678	1	0.00192678	0	0	0	0.0564926	MES_11
gpc5a	9	0.017341	9	0.017341	0	0	0	0.0591421	MES_11
mmp2	6	0.0115607	6	0.0115607	0	0	0	0.0596432	MES_11
zgc:154058	4	0.00770713	4	0.00770713	0	0	0	0.0264578	MES_11
smad6b	1	0.00192678	1	0.00192678	0	0	0	0.0321759	MES_11
lhx9	4	0.00770713	0	0	4	0.00770713	0	0.0233218	MES_11
esr2a	12	0.0231214	0	0	12	0.0231214	0	0.104954	MES_11
krt4	7	0.0134875	7	0.0134875	0	0	0	0.0651959	MES_11
baiap2l1a	3	0.00578035	3	0.00578035	0	0	0	0.0229091	MES_11
kazald3	3	0.00578035	3	0.00578035	0	0	0	0.0190693	MES_11
lpar1	4	0.00770713	4	0.00770713	0	0	0	0.065803	MES_11
cxadr	3	0.00578035	3	0.00578035	0	0	0	0.0250276	MES_11
celf2	6	0.0115607	6	0.0115607	0	0	0	0.0402393	MES_11
osr1	8	0.0154143	0	0	8	0.0154143	0	0.0350819	MES_11
nav3	1	0.00192678	1	0.00192678	0	0	0	0.0454645	MES_11
pcp4a	5	0.00963391	5	0.00963391	0	0	0	0.0739664	MES_11
rps6ka3b	5	0.00963391	5	0.00963391	0	0	0	0.0763823	MES_11
mhc1uba	5	0.00963391	5	0.00963391	0	0	0	0.0486458	MES_11
si:dkey-221j11.3	1	0.00192678	1	0.00192678	0	0	0	0.00573985	MES_11
hbegfa	7	0.0134875	7	0.0134875	0	0	0	0.0826837	MES_11
gli2b	8	0.0154143	1	0.00192678	7	0.0134875	27	0.0763343	MES_11
vcanb	3	0.00578035	3	0.00578035	0	0	0	0.0221889	MES_11
pard6b	2	0.00385356	2	0.00385356	0	0	0	0.017724	MES_11
entpd1	3	0.00578035	3	0.00578035	0	0	0	0.0309895	MES_11
lrmda	3	0.00578035	3	0.00578035	0	0	0	0.0669903	MES_11
mhc2dab	2	0.00385356	2	0.00385356	0	0	0	0.0177084	MES_11
fstl1a	6	0.0115607	6	0.0115607	0	0	0	0.0787712	MES_11
rnf213a	2	0.00385356	2	0.00385356	0	0	0	0.029578	MES_11
igf2bp2a	2	0.00385356	2	0.00385356	0	0	0	0.0492281	MES_11
il1b	1	0.00192678	1	0.00192678	0	0	0	0.0172668	MES_11
htra1b	3	0.00578035	3	0.00578035	0	0	0	0.050194	MES_11
f3a	6	0.0115607	6	0.0115607	0	0	0	0.0428058	MES_11
tmprss4a	4	0.00770713	4	0.00770713	0	0	0	0.0668729	MES_11
nkx3-1	6	0.0115607	0	0	6	0.0115607	0	0.00873467	MES_11
si:ch211-79k12.1	4	0.00770713	4	0.00770713	0	0	0	0.0337886	MES_11
aspn	9	0.017341	9	0.017341	0	0	0	0.063192	MES_11
tcnbb	5	0.00963391	5	0.00963391	0	0	0	0.0506226	MES_11
cyp26b1	3	0.00578035	3	0.00578035	0	0	0	0.0231528	MES_11
hlfa	7	0.0134875	0	0	7	0.0134875	0	0.0265341	MES_11
tenm3	4	0.00770713	4	0.00770713	0	0	0	0.0789961	MES_11
degs2	1	0.00192678	1	0.00192678	0	0	0	0.0159038	MES_11
plxdc2	2	0.00385356	2	0.00385356	0	0	0	0.0320792	MES_11
unc5b	1	0.00192678	1	0.00192678	0	0	0	0.052644	MES_11
fgfrl1a	2	0.00385356	2	0.00385356	0	0	0	0.00549515	MES_11
sgms1	3	0.00578035	3	0.00578035	0	0	0	0.0406288	MES_11
rbpjb	3	0.00578035	0	0	3	0.00578035	0	0.0248866	MES_11
cd248a	1	0.00192678	1	0.00192678	0	0	0	0.000975238	MES_11
krt18a.1	5	0.00963391	5	0.00963391	0	0	0	0.0332019	MES_11
pnp5a	3	0.00578035	3	0.00578035	0	0	0	0.0421694	MES_11
alx4b	8	0.0154143	0	0	8	0.0154143	0	0.0306826	MES_11
dachd	1	0.00192678	1	0.00192678	0	0	0	0.00389326	MES_11
nedd9	1	0.00192678	1	0.00192678	0	0	0	0.00287153	MES_11
ier2b	5	0.00963391	5	0.00963391	0	0	0	0.0455645	MES_11
asap3	3	0.00578035	3	0.00578035	0	0	0	0.0299326	MES_11
pdlim2	2	0.00385356	2	0.00385356	0	0	0	0.0132044	MES_11
klf12b	7	0.0134875	0	0	7	0.0134875	0	0.0388586	MES_11
rps23	2	0.00385356	2	0.00385356	0	0	0	0.0201038	MES_11
igf2b	3	0.00578035	3	0.00578035	0	0	0	0.0336177	MES_11
cpne5b	4	0.00770713	4	0.00770713	0	0	0	0.0574242	MES_11
hsd17b12a	3	0.00578035	3	0.00578035	0	0	0	0.0258052	MES_11
myoc	10	0.0192678	10	0.0192678	0	0	0	0.0447762	MES_11
ptgis	4	0.00770713	4	0.00770713	0	0	0	0.0645466	MES_11
add3a	3	0.00578035	3	0.00578035	0	0	0	0.0152091	MES_11
slc43a3b	7	0.0134875	7	0.0134875	0	0	0	0.0973068	MES_11
col5a2a	2	0.00385356	2	0.00385356	0	0	0	0.0101677	MES_11
nr1d4b	8	0.0154143	0	0	8	0.0154143	0	0.0610983	MES_11
ano1	2	0.00385356	2	0.00385356	0	0	0	0.0256343	MES_11
midn	3	0.00578035	3	0.00578035	0	0	0	0.0335062	MES_11
fam107b	1	0.00192678	1	0.00192678	0	0	0	0.0280712	MES_11
hmcn1	5	0.00963391	5	0.00963391	0	0	0	0.0648061	MES_11
cst14b.1	5	0.00963391	5	0.00963391	0	0	0	0.0872317	MES_11
lmna	3	0.00578035	3	0.00578035	0	0	0	0.0217291	MES_11
plod2	1	0.00192678	1	0.00192678	0	0	0	0.00676701	MES_11
osbpl3a	2	0.00385356	2	0.00385356	0	0	0	0.0240146	MES_11
krt96	1	0.00192678	1	0.00192678	0	0	0	0.0482514	MES_11
cebpd	11	0.0211946	0	0	11	0.0211946	0	0.0488335	MES_11
tlx2	4	0.00770713	0	0	4	0.00770713	0	0.0543461	MES_11
elovl1a	5	0.00963391	5	0.00963391	0	0	0	0.0566297	MES_11
bmpr1ba	3	0.00578035	3	0.00578035	0	0	0	0.031638	MES_11
pbx3b	4	0.00770713	0	0	4	0.00770713	0	0.0208023	MES_11
s1pr2	1	0.00192678	1	0.00192678	0	0	0	0.000535327	MES_11
si:dkey-172h23.2	1	0.00192678	1	0.00192678	0	0	0	0.0270342	MES_11
egr2b	3	0.00578035	0	0	3	0.00578035	0	0.0117852	MES_11
rplp0	3	0.00578035	3	0.00578035	0	0	0	0.028527	MES_11
rpl28	3	0.00578035	3	0.00578035	0	0	0	0.0213268	MES_11
pparaa	3	0.00578035	0	0	3	0.00578035	0	0.034323	MES_11
furina	1	0.00192678	1	0.00192678	0	0	0	0.000522489	MES_11
rgs5a	2	0.00385356	2	0.00385356	0	0	0	0.00898354	MES_11
pappaa	1	0.00192678	1	0.00192678	0	0	0	0.00635004	MES_11
nfat5b	3	0.00578035	0	0	3	0.00578035	0	0.0152079	MES_11
aebp1	3	0.00578035	3	0.00578035	0	0	0	0.0145121	MES_11
loxl1	3	0.00578035	3	0.00578035	0	0	0	0.0209219	MES_11
bcl11ab	5	0.00963391	0	0	5	0.00963391	0	0.0166368	MES_11
pax7b	3	0.00578035	0	0	3	0.00578035	0	0.0178463	MES_11
ptgdsb.1	3	0.00578035	3	0.00578035	0	0	0	0.0304671	MES_11
prickle2b	7	0.0134875	7	0.0134875	0	0	0	0.0801459	MES_11
serpinh1b	4	0.00770713	4	0.00770713	0	0	0	0.0432739	MES_11
mmp9	2	0.00385356	2	0.00385356	0	0	0	0.0466144	MES_11
crim1	3	0.00578035	3	0.00578035	0	0	0	0.0365345	MES_11
dlg2	1	0.00192678	1	0.00192678	0	0	0	0.00904796	MES_11
slco3a1	2	0.00385356	2	0.00385356	0	0	0	0.0287195	MES_11
pleca	5	0.00963391	5	0.00963391	0	0	0	0.0505118	MES_11
nrip2	2	0.00385356	2	0.00385356	0	0	0	0.0168387	MES_11
pdzrn3b	5	0.00963391	5	0.00963391	0	0	0	0.0588442	MES_11
enah	4	0.00770713	4	0.00770713	0	0	0	0.0403547	MES_11
rfx3	1	0.00192678	0	0	1	0.00192678	0	0.00684666	MES_11
f13a1b	1	0.00192678	1	0.00192678	0	0	0	0.00856653	MES_11
ccnd2a	3	0.00578035	3	0.00578035	0	0	0	0.0331563	MES_11
tfeb	2	0.00385356	0	0	2	0.00385356	0	0.020546	MES_11
rab6ba	2	0.00385356	2	0.00385356	0	0	0	0.00931023	MES_11
matn4	4	0.00770713	4	0.00770713	0	0	0	0.0198025	MES_11
macrod2	5	0.00963391	5	0.00963391	0	0	0	0.060626	MES_11
mgst1.2	2	0.00385356	2	0.00385356	0	0	0	0.00667214	MES_11
rhcgl1	3	0.00578035	3	0.00578035	0	0	0	0.0242426	MES_11
pdlim7	2	0.00385356	2	0.00385356	0	0	0	0.0108249	MES_11
lum	3	0.00578035	3	0.00578035	0	0	0	0.0174191	MES_11
pcna	3	0.00578035	3	0.00578035	0	0	0	0.0146717	MES_11
bmp7b	6	0.0115607	6	0.0115607	0	0	0	0.0269473	MES_11
anxa11a	3	0.00578035	3	0.00578035	0	0	0	0.0338568	MES_11
gfi1b	2	0.00385356	0	0	2	0.00385356	0	0.00565633	MES_11
nrgna	1	0.00192678	1	0.00192678	0	0	0	0.000241572	MES_11
selenop	4	0.00770713	4	0.00770713	0	0	0	0.043382	MES_11
trim16	2	0.00385356	2	0.00385356	0	0	0	0.0161795	MES_11
sp7	4	0.00770713	0	0	4	0.00770713	0	0.026488	MES_11
pcdh15b	2	0.00385356	2	0.00385356	0	0	0	0.00792907	MES_11
numbl	1	0.00192678	1	0.00192678	0	0	0	0.00690533	MES_11
zgc:152791	2	0.00385356	2	0.00385356	0	0	0	0.0137607	MES_11
dok6	2	0.00385356	2	0.00385356	0	0	0	0.0101499	MES_11
rpl18a	2	0.00385356	2	0.00385356	0	0	0	0.00945801	MES_11
rcan2	2	0.00385356	2	0.00385356	0	0	0	0.00944085	MES_11
col27a1b	3	0.00578035	3	0.00578035	0	0	0	0.0349224	MES_11
ebf1b	2	0.00385356	0	0	2	0.00385356	0	0.0445912	MES_11
tinagl1	2	0.00385356	2	0.00385356	0	0	0	0.0498576	MES_11
tjp3	2	0.00385356	2	0.00385356	0	0	0	0.0218506	MES_11
chst11	1	0.00192678	1	0.00192678	0	0	0	0.00289829	MES_11
mid1ip1a	2	0.00385356	2	0.00385356	0	0	0	0.0121497	MES_11
zgc:153911	2	0.00385356	2	0.00385356	0	0	0	0.0230662	MES_11
svila	1	0.00192678	1	0.00192678	0	0	0	0.00340618	MES_11
errfi1a	4	0.00770713	4	0.00770713	0	0	0	0.0225997	MES_11
lhfpl6	3	0.00578035	3	0.00578035	0	0	0	0.02298	MES_11
rpl7a	2	0.00385356	2	0.00385356	0	0	0	0.0153947	MES_11
notum1b	2	0.00385356	2	0.00385356	0	0	0	0.0126626	MES_11
actn4	4	0.00770713	4	0.00770713	0	0	0	0.0389906	MES_11
dachc	4	0.00770713	4	0.00770713	0	0	0	0.0472191	MES_11
adgra2	4	0.00770713	4	0.00770713	0	0	0	0.0533282	MES_11
aldh1a2	4	0.00770713	4	0.00770713	0	0	0	0.0285666	MES_11
nid1b	2	0.00385356	2	0.00385356	0	0	0	0.0267405	MES_11
tnfrsf9a	3	0.00578035	3	0.00578035	0	0	0	0.019319	MES_11
cxcl8b.1	2	0.00385356	2	0.00385356	0	0	0	0.0313089	MES_11
csf1a	1	0.00192678	1	0.00192678	0	0	0	0.00340049	MES_11
ctnnal1	1	0.00192678	1	0.00192678	0	0	0	0.00793792	MES_11
loxl2a	1	0.00192678	1	0.00192678	0	0	0	0.00219375	MES_11
lamb1a	2	0.00385356	2	0.00385356	0	0	0	0.04689	MES_11
batf	3	0.00578035	0	0	3	0.00578035	0	0.00669641	MES_11
rcn3	2	0.00385356	2	0.00385356	0	0	0	0.0526734	MES_11
emilin1b	3	0.00578035	3	0.00578035	0	0	0	0.050692	MES_11
slit2	1	0.00192678	1	0.00192678	0	0	0	0.00967902	MES_11
mhc2b	1	0.00192678	1	0.00192678	0	0	0	0.00980343	MES_11
pfn1	4	0.00770713	4	0.00770713	0	0	0	0.0816906	MES_11
ppm1e	4	0.00770713	4	0.00770713	0	0	0	0.0339085	MES_11
tnk1	1	0.00192678	1	0.00192678	0	0	0	0.012268	MES_11
bnc2	1	0.00192678	1	0.00192678	0	0	0	0.00578894	MES_11
ripor2	3	0.00578035	3	0.00578035	0	0	0	0.0405268	MES_11
socs3a	2	0.00385356	2	0.00385356	0	0	0	0.0103458	MES_11
ctss2.2	1	0.00192678	1	0.00192678	0	0	0	0.00395595	MES_11
diaph3	3	0.00578035	3	0.00578035	0	0	0	0.0162238	MES_11
nkain4	1	0.00192678	1	0.00192678	0	0	0	0.0374549	MES_11
alx4a	8	0.0154143	0	0	8	0.0154143	0	0.0366876	MES_11
eno1a	1	0.00192678	1	0.00192678	0	0	0	0.0112831	MES_11
notch1a	1	0.00192678	1	0.00192678	0	0	0	0.0111753	MES_11
slc4a11	2	0.00385356	2	0.00385356	0	0	0	0.00789617	MES_11
asip2b	2	0.00385356	2	0.00385356	0	0	0	0.0181284	MES_11
bcl2a	2	0.00385356	2	0.00385356	0	0	0	0.00751953	MES_11
grip1	3	0.00578035	3	0.00578035	0	0	0	0.0298693	MES_11
plek2	2	0.00385356	2	0.00385356	0	0	0	0.0454139	MES_11
icn	1	0.00192678	1	0.00192678	0	0	0	0.00723262	MES_11
sulf1	2	0.00385356	2	0.00385356	0	0	0	0.0472816	MES_11
col1a1a	2	0.00385356	2	0.00385356	0	0	0	0.0134344	MES_11
zcchc24	1	0.00192678	1	0.00192678	0	0	0	0.00557061	MES_11
pdlim4	1	0.00192678	1	0.00192678	0	0	0	0.0117249	MES_11
ccl25b	2	0.00385356	2	0.00385356	0	0	0	0.00982651	MES_11
mki67	1	0.00192678	1	0.00192678	0	0	0	0.00455735	MES_11
scube3	1	0.00192678	1	0.00192678	0	0	0	0.0360203	MES_11
ephb2b	2	0.00385356	2	0.00385356	0	0	0	0.00585273	MES_11
tnn	1	0.00192678	1	0.00192678	0	0	0	0.00299794	MES_11
nfkbiaa	3	0.00578035	3	0.00578035	0	0	0	0.021543	MES_11
soul2	1	0.00192678	1	0.00192678	0	0	0	0.00314892	MES_11
spock3	2	0.00385356	2	0.00385356	0	0	0	0.0157986	MES_11
tppp3	2	0.00385356	2	0.00385356	0	0	0	0.0263614	MES_11
gfra4a	1	0.00192678	1	0.00192678	0	0	0	0.0123931	MES_11
tmprss13b	1	0.00192678	1	0.00192678	0	0	0	0.000306992	MES_11
ftr83	1	0.00192678	1	0.00192678	0	0	0	0.00896086	MES_11
bhmt	2	0.00385356	2	0.00385356	0	0	0	0.00652607	MES_11
ngfa	2	0.00385356	2	0.00385356	0	0	0	0.0249648	MES_11
sik1	1	0.00192678	1	0.00192678	0	0	0	0.0104202	MES_11
tnfrsf18	1	0.00192678	1	0.00192678	0	0	0	0.0088648	MES_11
cadm4	1	0.00192678	1	0.00192678	0	0	0	0.00884358	MES_11
hey2	2	0.00385356	0	0	2	0.00385356	0	0.00448588	MES_11
ackr3b	1	0.00192678	1	0.00192678	0	0	0	0.011257	MES_11
mgat4b	1	0.00192678	1	0.00192678	0	0	0	0.00270194	MES_11
nupr1b	1	0.00192678	1	0.00192678	0	0	0	0.000774128	MES_11
arid3a	3	0.00578035	0	0	3	0.00578035	0	0.010725	MES_11
rtn4r	1	0.00192678	1	0.00192678	0	0	0	0.000229922	MES_11
elovl6l	1	0.00192678	1	0.00192678	0	0	0	0.00877544	MES_11
lrrn1	3	0.00578035	3	0.00578035	0	0	0	0.0552366	MES_11
rplp2l	1	0.00192678	1	0.00192678	0	0	0	0.00574174	MES_11
slc12a2	1	0.00192678	1	0.00192678	0	0	0	0.0195533	MES_11
rbp4	1	0.00192678	1	0.00192678	0	0	0	0.00166412	MES_11
crip2	1	0.00192678	1	0.00192678	0	0	0	0.00518385	MES_11
bicdl2l	1	0.00192678	1	0.00192678	0	0	0	0.00299372	MES_11
hopx	1	0.00192678	1	0.00192678	0	0	0	0.0127047	MES_11
sgcd	1	0.00192678	1	0.00192678	0	0	0	0.0279171	MES_11
meis3	1	0.00192678	0	0	1	0.00192678	0	0.00526123	MES_11
ckba	1	0.00192678	1	0.00192678	0	0	0	0.00613765	MES_11
efemp2b	1	0.00192678	1	0.00192678	0	0	0	0.0054902	MES_11
map3k22	1	0.00192678	1	0.00192678	0	0	0	0.0147251	MES_11
adamts15a	1	0.00192678	1	0.00192678	0	0	0	0.000751499	MES_11
aste1a	1	0.00192678	1	0.00192678	0	0	0	0.00574893	MES_11
ugt5f1	1	0.00192678	1	0.00192678	0	0	0	0.00293586	MES_11
parvab	1	0.00192678	1	0.00192678	0	0	0	0.00238221	MES_11
ret	1	0.00192678	1	0.00192678	0	0	0	0.0331298	MES_11
adma	1	0.00192678	1	0.00192678	0	0	0	0.00407469	MES_11
gig2l	1	0.00192678	1	0.00192678	0	0	0	0.00844284	MES_11
inhbaa	1	0.00192678	1	0.00192678	0	0	0	0.00541302	MES_11
zbtb16a	1	0.00192678	1	0.00192678	0	0	0	0.00115333	MES_11
ccdc80	1	0.00192678	1	0.00192678	0	0	0	0.00437357	MES_11
adcy5	1	0.00192678	1	0.00192678	0	0	0	0.00191904	MES_11
niban1a	1	0.00192678	1	0.00192678	0	0	0	0.0090086	MES_11
tmprss13a	1	0.00192678	1	0.00192678	0	0	0	0.00286054	MES_11
tent5bb	1	0.00192678	1	0.00192678	0	0	0	0.0267143	MES_11
kpna2	1	0.00192678	1	0.00192678	0	0	0	0.00406637	MES_11
fgfr1b	1	0.00192678	1	0.00192678	0	0	0	0.00510414	MES_11
[truncated: 4,466 more rows]
